# Supplementary material for: Drivers and sites of diversity in the DNA adenine methylomes of 93 Mycobacterium tuberculosis complex clinical isolates
Source: eLife. 2020 Oct 27;9:e58542. doi: 10.7554/eLife.58542 (PMC7591249; doi:10.7554/eLife.58542)
Supplement: Figure 2—source data 1. [file elife-58542-fig2-data1.csv]

MTase	Isolate	scaled IPD Ratio	Genotype
MamA	1-0006	0.163405391051308	E270A
MamA	1-0006	0.443825852498491	E270A
MamA	1-0006	0.426218371815081	E270A
MamA	1-0006	-0.0556697259012945	E270A
MamA	1-0006	0.732337781953516	E270A
MamA	1-0006	1.40783274498075	E270A
MamA	1-0006	0.641793275463684	E270A
MamA	1-0006	0.624526772332414	E270A
MamA	1-0006	1.02842371400606	E270A
MamA	1-0006	0.686851825224855	E270A
MamA	1-0006	0.333625573065676	E270A
MamA	1-0006	0.298975330942175	E270A
MamA	1-0006	0.31819553249607	E270A
MamA	1-0006	0.467690525151421	E270A
MamA	1-0006	0.521540499095675	E270A
MamA	1-0006	0.100964816275401	E270A
MamA	1-0006	1.88070942183301	E270A
MamA	1-0006	1.33421575308654	E270A
MamA	1-0006	0.412870288554137	E270A
MamA	1-0006	0.103736565525455	E270A
MamA	1-0006	0.417333385820863	E270A
MamA	1-0006	2.44764901024833	E270A
MamA	1-0006	0.817533684923086	E270A
MamA	1-0006	1.44437263857321	E270A
MamA	1-0006	0.97341476655489	E270A
MamA	1-0006	0.963530651196708	E270A
MamA	1-0006	1.08351968181599	E270A
MamA	1-0006	0.546202553329944	E270A
MamA	1-0006	0.365154764854904	E270A
MamA	1-0006	0.121624286841494	E270A
MamA	1-0006	1.17991615767022	E270A
MamA	1-0006	1.75499489029171	E270A
MamA	1-0006	0.313414434364271	E270A
MamA	1-0006	0.766847312380125	E270A
MamA	1-0006	-0.0821992086561093	E270A
MamA	1-0006	0.0443812879090337	E270A
MamA	1-0006	1.57095094840682	E270A
MamA	1-0006	1.2941300029926	E270A
MamA	1-0006	0.99447638208272	E270A
MamA	1-0006	0.433948099671759	E270A
MamA	1-0006	0.665436791208773	E270A
MamA	1-0006	0.5225765458482	E270A
MamA	1-0006	0.642746493232678	E270A
MamA	1-0006	0.486926744014338	E270A
MamA	1-0006	0.0630154620480847	E270A
MamA	1-0006	0.171354144166799	E270A
MamA	1-0006	1.01964460958753	E270A
MamA	1-0006	0.984735999442327	E270A
MamA	1-0006	0.82511132438541	E270A
MamA	1-0006	0.00637496532928879	E270A
MamA	1-0006	-0.323350496591453	E270A
MamA	1-0006	-0.143325867217695	E270A
MamA	1-0006	0.183195756811316	E270A
MamA	1-0006	0.442731658254998	E270A
MamA	1-0006	0.485864767491679	E270A
MamA	1-0006	0.0729504401058046	E270A
MamA	1-0006	1.15741495320893	E270A
MamA	1-0006	0.655081350043798	E270A
MamA	1-0006	0.997460240521541	E270A
MamA	1-0006	1.32474377788281	E270A
MamA	1-0006	0.562412780511203	E270A
MamA	1-0006	0.892378194463984	E270A
MamA	1-0006	0.358207584299432	E270A
MamA	1-0006	0.0342469107753205	E270A
MamA	1-0006	-0.0175211510168731	E270A
MamA	1-0006	-0.39784104069604	E270A
MamA	1-0006	0.230881845553528	E270A
MamA	1-0006	0.202718315076134	E270A
MamA	1-0006	0.355884403377303	E270A
MamA	1-0006	0.137941464071372	E270A
MamA	1-0006	0.780769688612494	E270A
MamA	1-0006	0.562412780511203	E270A
MamA	1-0006	0.75895652676066	E270A
MamA	1-0006	0.726954585256612	E270A
MamA	1-0006	0.350060031151321	E270A
MamA	1-0006	0.38237775142405	E270A
MamA	1-0006	0.258506093261881	E270A
MamA	1-0006	-0.0759129458086781	E270A
MamA	1-0006	-0.120503096832749	E270A
MamA	1-0006	0.223255246078829	E270A
MamA	1-0006	0.856674132782305	E270A
MamA	1-0006	1.0573074623533	E270A
MamA	1-0006	0.313414434364271	E270A
MamA	1-0006	0.151399537791154	E270A
MamA	1-0006	1.09470884146746	E270A
MamA	1-0006	1.0159708234391	E270A
MamA	1-0006	0.543142753580886	E270A
MamA	1-0006	0.749253252365387	E270A
MamA	1-0006	1.11064273017776	E270A
MamA	1-0006	0.601178534501777	E270A
MamA	1-0006	0.0443812879090337	E270A
MamA	1-0006	1.0218443991485	E270A
MamA	1-0006	0.365154764854904	E270A
MamA	1-0006	0.262232384720165	E270A
MamA	1-0006	1.05945060962668	E270A
MamA	1-0006	0.718841939469293	E270A
MamA	1-0006	-0.0948545094621383	E270A
MamA	1-0006	0.544163408056345	E270A
MamA	1-0006	0.701563948037457	E270A
MamA	1-0006	2.73144197624893	E270A
MamA	1-0006	0.494338771537037	E270A
MamA	1-0006	0.905939707481062	E270A
MamA	1-0006	0.644651041418038	E270A
MamA	1-0006	1.18319575681132	E270A
MamA	1-0006	1.74570854532197	E270A
MamA	1-0006	1.47037760926011	E270A
MamA	1-0006	0.109264139493888	E270A
MamA	1-0006	0.462301295720999	E270A
MamA	1-0006	0.813306623472785	E270A
MamA	1-0006	1.32414970950263	E270A
MamA	1-0006	-0.0341823812846684	E270A
MamA	1-0006	0.585400441042593	E270A
MamA	1-0006	0.512182444397441	E270A
MamA	1-0006	0.771212504941527	E270A
MamA	1-0006	0.915436362995663	E270A
MamA	1-0006	0.514267264183497	E270A
MamA	1-0006	1.23214903495506	E270A
MamA	1-0006	0.825950832725008	E270A
MamA	1-0006	1.25289854771458	E270A
MamA	1-0006	1.41454556844924	E270A
MamA	1-0006	0.410633551608598	E270A
MamA	1-0006	0.228344122751629	E270A
MamA	1-0006	0.295342861442253	E270A
MamA	1-0006	0.281945006226709	E270A
MamA	1-0006	0.415103563057201	E270A
MamA	1-0006	0.301391906115058	E270A
MamA	1-0006	0.88111336836817	E270A
MamA	1-0006	1.0587365808861	E270A
MamA	1-0006	0.77469517420281	E270A
MamA	1-0006	1.00192448866614	E270A
MamA	1-0006	1.17728709992054	E270A
MamA	1-0006	0.511138903635205	E270A
MamA	1-0006	1.25414655388314	E270A
MamA	1-0006	0.260991356651475	E270A
MamA	1-0006	0.232149034955059	E270A
MamA	1-0006	0.781635392233363	E270A
MamA	1-0006	1.84014823569143	E270A
MamA	1-0006	1.59232459919938	E270A
MamA	1-0006	1.45091795811421	E270A
MamA	1-0006	1.36803957893528	E270A
MamA	1-0006	0.908319738333005	E270A
MamA	1-0006	0.648452611577895	E270A
MamA	1-0006	0.957414287861175	E270A
MamA	1-0006	1.19624010463604	E270A
MamA	1-0006	0.435048973468701	E270A
MamA	1-0006	0.29048529779295	E270A
MamA	1-0006	0.566437037069998	E270A
MamA	1-0006	0.650349646750492	E270A
MamA	1-0006	1.10027104610532	E270A
MamA	1-0006	1.06159057794126	E270A
MamA	1-0006	0.662619943504488	E270A
MamA	1-0006	1.28926834703257	E270A
MamA	1-0006	-0.243683355112045	E270A
MamA	1-0006	0.275813696356999	E270A
MamA	1-0006	1.25601654123618	E270A
MamA	1-0006	0.9381317896296	E270A
MamA	1-0006	1.6065626443809	E270A
MamA	1-0006	1.56944787998724	E270A
MamA	1-0006	1.32533760174009	E270A
MamA	1-0006	1.0863251178792	E270A
MamA	1-0006	0.135234718360147	E270A
MamA	1-0006	0.621628823502185	E270A
MamA	1-0006	0.578442890330152	E270A
MamA	1-0006	1.15206915722341	E270A
MamA	1-0006	1.72515571340149	E270A
MamA	1-0006	1.54773002307654	E270A
MamA	1-0006	0.988490087016989	E270A
MamA	1-0006	0.780769688612494	E270A
MamA	1-0006	0.80225794765693	E270A
MamA	1-0006	1.0159708234391	E270A
MamA	1-0006	0.39713981294967	E270A
MamA	1-0006	1.30681444554038	E270A
MamA	1-0006	-0.135133369104587	E270A
MamA	1-0006	0.765097530430165	E270A
MamA	1-0006	0.698816828754433	E270A
MamA	1-0006	0.776433361209323	E270A
MamA	1-0006	0.181884811658969	E270A
MamA	1-0006	0.132522884778051	E270A
MamA	1-0006	0.181884811658969	E270A
MamA	1-0006	0.402777549865688	E270A
MamA	1-0006	1.37149375865612	E270A
MamA	1-0006	1.95932843838861	E270A
MamA	1-0006	0.954346354667002	E270A
MamA	1-0006	0.756316644887955	E270A
MamA	1-0006	0.808217746799985	E270A
MamA	1-0006	1.45689185915884	E270A
MamA	1-0006	0.675718432036515	E270A
MamA	1-0006	0.347723682396365	E270A
MamA	1-0006	0.584408557166541	E270A
MamA	1-0006	0.110642730177755	E270A
MamA	1-0006	1.59084364607613	E270A
MamA	1-0006	0.820063989648094	E270A
MamA	1-0006	1.25164946102106	E270A
MamA	1-0006	0.695145847025936	E270A
MamA	1-0006	2.21302332346787	E270A
MamA	1-0006	1.57295260677979	E270A
MamA	1-0006	1.20659132422334	E270A
MamA	1-0006	0.914647358305016	E270A
MamA	1-0006	0.893980299060485	E270A
MamA	1-0006	0.590349657014326	E270A
MamA	1-0006	1.15005936580357	E270A
MamA	1-0006	1.01891060039292	E270A
MamA	1-0006	0.604117812342016	E270A
MamA	1-0006	0.935800474755112	E270A
MamA	1-0006	1.01376205285064	E270A
MamA	1-0006	1.99932202299813	E270A
MamA	1-0006	1.46013995443153	E270A
MamA	1-0006	1.50643360670547	E270A
MamA	1-0006	0.497503734504846	E270A
MamA	1-0006	0.168709422911235	E270A
MamA	1-0006	0.420671671246085	E270A
MamA	1-0006	1.36803957893528	E270A
MamA	1-0006	1.11888672427266	E270A
MamA	1-0006	0.435048973468701	E270A
MamA	1-0006	1.11683013797873	E270A
MamA	1-0006	0.583415990879788	E270A
MamA	1-0006	0.846781328023873	E270A
MamA	1-0006	1.5032881947599	E270A
MamA	1-0006	0.455807533635499	E270A
MamA	1-0006	0.374365937667454	E270A
MamA	1-0006	0.637017716515611	E270A
MamA	1-0006	0.79112400368677	E270A
MamA	1-0006	0.960475710847392	E270A
MamA	1-0006	1.1120200047844	E270A
MamA	1-0006	0.830141062336045	E270A
MamA	1-0006	0.7554356097211	E270A
MamA	1-0006	1.30621294666117	E270A
MamA	1-0006	1.20788002019191	E270A
MamA	1-0006	1.02769415897615	E270A
MamA	1-0006	1.30139190611506	E270A
MamA	1-0006	0.470914426025707	E270A
MamA	1-0006	0.301391906115058	E270A
MamA	1-0006	0.232149034955059	E270A
MamA	1-0006	0.486926744014338	E270A
MamA	1-0006	0.743044287794918	E270A
MamA	1-0006	0.484802008665801	E270A
MamA	1-0006	0.750138069958831	E270A
MamA	1-0006	0.166059844497286	E270A
MamA	1-0006	0.487987939384649	E270A
MamA	1-0006	0.724255435655657	E270A
MamA	1-0006	1.32711760818538	E270A
MamA	1-0006	0.548238820486463	E270A
MamA	1-0006	0.678509845434074	E270A
MamA	1-0006	0.389209784906475	E270A
MamA	1-0006	0.814153027158482	E270A
MamA	1-0006	1.61775581435498	E270A
MamA	1-0006	1.61775581435498	E270A
MamA	1-0006	1.40727193057489	E270A
MamA	1-0006	0.562412780511203	E270A
MamA	1-0006	0.717937711899178	E270A
MamA	1-0006	0.634144774894011	E270A
MamA	1-0006	1.26842156212696	E270A
MamA	1-0006	0.623561436036184	E270A
MamA	1-0006	0.36052703020239	E270A
MamA	1-0006	0.809916034272011	E270A
MamA	1-0006	1.05444497125373	E270A
MamA	1-0006	0.422892911162764	E270A
MamA	1-0006	0.568444963686244	E270A
MamA	1-0006	0.795416464576896	E270A
MamA	1-0006	0.940459343306098	E270A
MamA	1-0006	0.628381671194806	E270A
MamA	1-0006	1.20336453906942	E270A
MamA	1-0006	1.0954052909335	E270A
MamA	1-0006	1.64892710427774	E270A
MamA	1-0006	1.05945060962668	E270A
MamA	1-0006	0.0658610153194851	E270A
MamA	1-0006	0.640839427468019	E270A
MamA	1-0006	1.15273846599945	E270A
MamA	1-0006	0.345383543941848	E270A
MamA	1-0006	1.10788423021519	E270A
MamA	1-0006	0.765097530430165	E270A
MamA	1-0006	1.07436415412475	E270A
MamA	1-0006	0.275813696356999	E270A
MamA	1-0006	1.04004669764514	E270A
MamA	1-0006	0.238468340025336	E270A
MamA	1-0006	1.29716023943722	E270A
MamA	1-0006	0.800550616048332	E270A
MamA	1-0006	0.113395965824214	E270A
MamA	1-0006	-0.131869351782694	E270A
MamA	1-0006	0.646553078662413	E270A
MamA	1-0006	-0.295694153688588	E270A
MamA	1-0006	1.03787450896745	E270A
MamA	1-0006	0.00785541188391967	E270A
MamA	1-0006	0.273353857669194	E270A
MamA	1-0006	0.930346044663004	E270A
MamA	1-0006	-0.248977654781558	E270A
MamA	1-0006	2.08807574913501	E270A
MamA	1-0006	1.8887669409116	E270A
MamA	1-0006	0.451462063359535	E270A
MamA	1-0006	0.286831361586735	E270A
MamA	1-0006	0.113395965824214	E270A
MamA	1-0006	0.698816828754433	E270A
MamA	1-0006	-0.505661228462963	E270A
MamA	1-0006	0.634144774894011	E270A
MamA	1-0006	1.07577648418457	E270A
MamA	1-0006	0.943556918389547	E270A
MamA	1-0006	1.13320132120762	E270A
MamA	1-0006	1.17003238957055	E270A
MamA	1-0006	1.77034052241822	E270A
MamA	1-0006	1.05157678931324	E270A
MamA	1-0006	0.618725041829047	E270A
MamA	1-0006	0.952041115762323	E270A
MamA	1-0006	0.64750315774903	E270A
MamA	1-0006	0.989988991090406	E270A
MamA	1-0006	1.09679718206017	E270A
MamA	1-0006	1.05157678931324	E270A
MamA	1-0006	0.548238820486463	E270A
MamA	1-0006	0.708864128273716	E270A
MamA	1-0006	0.455807533635499	E270A
MamA	1-0006	0.751906078808642	E270A
MamA	1-0006	0.7554356097211	E270A
MamA	1-0006	2.23625973045539	E270A
MamA	1-0006	1.14468619370472	E270A
MamA	1-0006	1.88796321106302	E270A
MamA	1-0006	0.252274139550367	E270A
MamA	1-0006	0.39713981294967	E270A
MamA	1-0006	-0.179936010351906	E270A
MamA	1-0006	0.490107991259018	E270A
MamA	1-0006	-0.0115099129830114	E270A
MamA	1-0006	0.246015149078684	E270A
MamA	1-0006	0.224529149067462	E270A
MamA	1-0006	-0.301183171245567	E270A
MamA	1-0006	1.04942190460956	E270A
MamA	1-0006	0.328895421153279	E270A
MamA	1-0006	0.460139954431532	E270A
MamA	1-0006	0.125720915360972	E270A
MamA	1-0006	1.29048529779295	E270A
MamA	1-0006	0.541099275844211	E270A
MamA	1-0006	0.577446209778671	E270A
MamA	1-0006	0.393746565503247	E270A
MamA	1-0006	1.11751599253925	E270A
MamA	1-0006	1.66073898490572	E270A
MamA	1-0006	0.0211115085861865	E270A
MamA	1-0006	0.279495608285391	E270A
MamA	1-0006	0.660738984905724	E270A
MamA	1-0006	0.305009196035732	E270A
MamA	1-0006	0.487987939384649	E270A
MamA	1-0006	0.966579136305401	E270A
MamA	1-0006	0.811612324932909	E270A
MamA	1-0006	0.163405391051308	E270A
MamA	1-0006	0.783365242609545	E270A
MamA	1-0006	0.369767702568807	E270A
MamA	1-0006	1.14199208453546	E270A
MamA	1-0006	0.312216680006649	E270A
MamA	1-0006	0.630305264867635	E270A
MamA	1-0006	0.828466430643791	E270A
MamA	1-0006	0.143339767997202	E270A
MamA	1-0006	0.353557475387548	E270A
MamA	1-0006	1.17794481365014	E270A
MamA	1-0006	1.29170122288885	E270A
MamA	1-0006	0.280720827077407	E270A
MamA	1-0006	0.767721408160205	E270A
MamA	1-0006	0.216868803419168	E270A
MamA	1-0006	0.86159521216736	E270A
MamA	1-0006	0.597250158920337	E270A
MamA	1-0006	1.23088184555353	E270A
MamA	1-0006	0.649401440971443	E270A
MamA	1-0006	0.268421562126964	E270A
MamA	1-0006	0.351226788223316	E270A
MamA	1-0006	0.389209784906475	E270A
MamA	1-0006	0.562412780511203	E270A
MamA	1-0006	0.890774308761394	E270A
MamA	1-0006	1.50381290654633	E270A
MamA	1-0006	0.139292934934501	E270A
MamA	1-0006	-0.0916802616669947	E270A
MamA	1-0006	0.140643140967437	E270A
MamA	1-0006	0.646553078662413	E270A
MamA	1-0006	0.267185848954295	E270A
MamA	1-0006	1.80694271795792	E270A
MamA	1-0006	0.866499562638378	E270A
MamA	1-0006	1.04438128790903	E270A
MamA	1-0006	1.81711153567621	E270A
MamA	1-0006	1.00043794032144	E270A
MamA	1-0006	0.168709422911235	E270A
MamA	1-0006	1.42898374555979	E270A
MamA	1-0006	-0.261407104323076	E270A
MamA	1-0006	0.917013079044284	E270A
MamA	1-0006	0.253522685747625	E270A
MamA	1-0006	0.180572674196178	E270A
MamA	1-0006	0.140643140967437	E270A
MamA	1-0006	0.399397552128584	E270A
MamA	1-0006	-0.0418197471402702	E270A
MamA	1-0006	0.185814078838329	E270A
MamA	1-0006	0.463380753340299	E270A
MamA	1-0006	0.0630154620480847	E270A
MamA	1-0006	0.144686193704719	E270A
MamA	1-0006	0.435048973468701	E270A
MamA	1-0006	0.412870288554137	E270A
MamA	1-0006	0.505909847381911	E270A
MamA	1-0006	0.780769688612494	E270A
MamA	1-0006	0.692386467719527	E270A
MamA	1-0006	0.693306847362155	E270A
MamA	1-0006	1.15474453126945	E270A
MamA	1-0006	1.02842371400606	E270A
MamA	1-0006	-0.0853526416949836	E270A
MamA	1-0006	0.596266391380758	E270A
MamA	1-0006	1.49539453085301	E270A
MamA	1-0006	1.44382585249849	E270A
MamA	1-0006	0.428431094704193	E270A
MamA	1-0006	1.20465611931763	E270A
MamA	1-0006	0.681295868264912	E270A
MamA	1-0006	0.303804440190449	E270A
MamA	1-0006	0.28316814749615	E270A
MamA	1-0006	0.791983518183977	E270A
MamA	1-0006	1.3359848459396	E270A
MamA	1-0006	0.517388855825208	E270A
MamA	1-0006	0.956647915975483	E270A
MamA	1-0006	1.39544418684942	E270A
MamA	1-0006	0.136588726006123	E270A
MamA	1-0006	0.483738466383291	E270A
MamA	1-0006	1.50957217583502	E270A
MamA	1-0006	1.57395239548293	E270A
MamA	1-0006	0.712500412595466	E270A
MamA	1-0006	0.583415990879788	E270A
MamA	1-0006	0.843468593983037	E270A
MamA	1-0006	0.269656217778603	E270A
MamA	1-0006	0.213023323467873	E270A
MamA	1-0006	0.467690525151421	E270A
MamA	1-0006	0.272122363748162	E270A
MamA	1-0006	0.274584301275455	E270A
MamA	1-0006	0.958945811402973	E270A
MamA	1-0006	2.03461008133505	E270A
MamA	1-0006	0.633185854924584	E270A
MamA	1-0006	-0.0806250731579989	E270A
MamA	1-0006	0.596266391380758	E270A
MamA	1-0006	0.260991356651475	E270A
MamA	1-0006	0.609003340346014	E270A
MamA	1-0006	0.328895421153279	E270A
MamA	1-0006	0.921732914358296	E270A
MamA	1-0006	0.292916124047712	E270A
MamA	1-0006	0.319388335408904	E270A
MamA	1-0006	0.200130520586979	E270A
MamA	1-0006	-0.240164584975249	E270A
MamA	1-0006	0.431743828745029	E270A
MamA	1-0006	0.102351356546364	E270A
MamA	1-0006	0.380093198229496	E270A
MamA	1-0006	0.340691848617126	E270A
MamA	1-0006	-0.0160159917349226	E270A
MamA	1-0006	0.95818025285973	E270A
MamA	1-0006	1.79969619195413	E270A
MamA	1-0006	1.03206596547579	E270A
MamA	1-0006	0.948961722830351	E270A
MamA	1-0006	1.17860222766967	E270A
MamA	1-0006	-0.109225691238606	E270A
MamA	1-0006	1.1534074644074	E270A
MamA	1-0006	0.162076330578788	E270A
MamA	1-0006	0.763345623668572	E270A
MamA	1-0006	1.29837055413982	E270A
MamA	1-0006	-0.495138242050955	E270A
MamA	1-0006	-0.256067079567877	E270A
MamA	1-0006	0.889168637988094	E270A
MamA	1-0006	1.11545744991999	E270A
MamA	1-0006	0.512182444397441	E270A
MamA	1-0006	0.974172285627631	E270A
MamA	1-0006	1.49381060201223	E270A
MamA	1-0006	1.88916863798809	E270A
MamA	1-0006	1.31819553249607	E270A
MamA	1-0006	1.63462399597162	E270A
MamA	1-0006	-0.0948545094621383	E270A
MamA	1-0006	1.04654370905965	E270A
MamA	1-0006	0.869759891801965	E270A
MamA	1-0006	0.632226297163311	E270A
MamA	1-0006	1.2616120041297	E270A
MamA	1-0006	1.55382378098921	E270A
MamA	1-0006	-0.013010375979303	E270A
MamA	1-0006	0.291701222888853	E270A
MamA	1-0006	-0.117271975569736	E270A
MamA	1-0006	0.653190530584558	E270A
MamA	1-0006	0.837652942407116	E270A
MamA	1-0006	0.0544449712537312	E270A
MamA	1-0006	0.820063989648094	E270A
MamA	1-0006	0.931126512651143	E270A
MamA	1-0006	0.770340522418221	E270A
MamA	1-0006	0.0785970032469467	E270A
MamA	1-0006	0.070118849322642	E270A
MamA	1-0006	0.0167063294661854	E270A
MamA	1-0006	0.783365242609545	E270A
MamA	1-0006	-0.659308151382874	E270A
MamA	1-0006	0.76246887186955	E270A
MamA	1-0006	0.61387237986775	E270A
MamA	1-0006	0.962003989635316	E270A
MamA	1-0006	1.18122889210191	E270A
MamA	1-0006	0.590349657014326	E270A
MamA	1-0006	-0.173210147163593	E270A
MamA	1-0006	0.610952928535794	E270A
MamA	1-0006	0.93968390924234	E270A
MamA	1-0006	2.02111150858619	E270A
MamA	1-0006	1.14535893563385	E270A
MamA	1-0006	1.19038473904796	E270A
MamA	1-0006	1.23024783322037	E270A
MamA	1-0006	0.517388855825208	E270A
MamA	1-0006	0.521540499095675	E270A
MamA	1-0006	1.42511073641258	E270A
MamA	1-0006	1.22261787251384	E270A
MamA	1-0006	0.247269121379177	E270A
MamA	1-0006	0.400525098134309	E270A
MamA	1-0006	0.529808115079275	E270A
MamA	1-0006	0.484802008665801	E270A
MamA	1-0006	0.731441976248926	E270A
MamA	1-0006	0.120256154884161	E270A
MamA	1-0006	1.01964460958753	E270A
MamA	1-0006	0.794558993502091	E270A
MamA	1-0006	1.3558844033773	E270A
MamA	1-0006	1.68222334823314	E270A
MamA	1-0006	1.9903634739065	E270A
MamA	1-0006	1.06728169001911	E270A
MamA	1-0006	0.565432024809997	E270A
MamA	1-0006	0.156747810981597	E270A
MamA	1-0006	0.500661769419759	E270A
MamA	1-0006	1.21109673287546	E270A
MamA	1-0006	0.722453193021671	E270A
MamA	1-0006	0.869759891801965	E270A
MamA	1-0006	1.14670347910572	E270A
MamA	1-0006	0.732337781953516	E270A
MamA	1-0006	1.43339734759754	E270A
MamA	1-0006	0.760713768197021	E270A
MamA	1-0006	1.26656759523115	E270A
MamA	1-0006	-0.0326597478547943	E270A
MamA	1-0006	1.36226417073845	E270A
MamA	1-0006	1.02111150858619	E270A
MamA	1-0006	1.19948284603474	E270A
MamA	1-0006	0.938908058166428	E270A
MamA	1-0006	0.453636434593872	E270A
MamA	1-0006	1.03569904480923	E270A
MamA	1-0006	0.654136250081477	E270A
MamA	1-0006	0.654136250081477	E270A
MamA	1-0006	-0.0175211510168731	E270A
MamA	1-0006	0.181884811658969	E270A
MamA	1-0006	1.10304412728759	E270A
MamA	1-0006	0.192339169296135	E270A
MamA	1-0006	0.0814120188540007	E270A
MamA	1-0006	0.491166850052156	E270A
MamA	1-0006	1.10788423021519	E270A
MamA	1-0006	1.83348450541042	E270A
MamA	1-0006	0.339516536909852	E270A
MamA	1-0006	-0.156531406016963	E270A
MamA	1-0006	1.31281568148542	E270A
MamA	1-0006	0.758077102752393	E270A
MamA	1-0006	1.66026836182509	E270A
MamA	1-0006	1.58093158344494	E270A
MamA	1-0006	0.729648694425875	E270A
MamA	1-0006	1.29837055413982	E270A
MamA	1-0006	0.464459403888408	E270A
MamA	1-0006	0.785956135327829	E270A
MamA	1-0006	0.412870288554137	E270A
MamA	1-0006	0.256016541236183	E270A
MamA	1-0006	0.547221046164965	E270A
MamA	1-0006	0.64560237349398	E270A
MamA	1-0006	0.197538075970454	E270A
MamA	1-0006	0.411752353557563	E270A
MamA	1-0006	0.247269121379177	E270A
MamA	1-0006	0.75895652676066	E270A
MamA	1-0006	0.937355103182367	E270A
MamA	1-0006	1.19559068079393	E270A
MamA	1-0006	1.36342110347157	E270A
MamA	1-0006	1.38408879535763	E270A
MamA	1-0006	1.04293787103936	E270A
MamA	1-0006	0.45254965861714	E270A
MamA	1-0006	-0.59497350963075	E270A
MamA	1-0006	0.0196446095875273	E270A
MamA	1-0006	0.444919217492763	E270A
MamA	1-0006	1.32058015294128	E270A
MamA	1-0006	0.0240408396248582	E270A
MamA	1-0006	0.540076450533102	E270A
MamA	1-0006	0.0327933136338219	E270A
MamA	1-0006	1.18712146002512	E270A
MamA	1-0006	1.42511073641258	E270A
MamA	1-0006	1.35472140852118	E270A
MamA	1-0006	0.751906078808642	E270A
MamA	1-0006	0.998949858662028	E270A
MamA	1-0006	0.393746565503247	E270A
MamA	1-0006	0.461221029821863	E270A
MamA	1-0006	0.490107991259018	E270A
MamA	1-0006	0.473059697857264	E270A
MamA	1-0006	1.1567478109816	E270A
MamA	1-0006	0.419559767498646	E270A
MamA	1-0006	0.114770615800432	E270A
MamA	1-0006	0.671988126038684	E270A
MamA	1-0006	0.9982052418502	E270A
MamA	1-0006	0.567441349704283	E270A
MamA	1-0006	1.08562427014092	E270A
MamA	1-0006	1.08702562531753	E270A
MamA	1-0006	0.484802008665801	E270A
MamA	1-0006	0.259749260112513	E270A
MamA	1-0006	0.542121376518127	E270A
MamA	1-0006	1.28194500622671	E270A
MamA	1-0006	0.259749260112513	E270A
MamA	1-0006	1.3217709867199	E270A
MamA	1-0006	0.141992084535456	E270A
MamA	1-0006	0.375513210126236	E270A
MamA	1-0006	0.88836513195736	E270A
MamA	1-0006	1.02550327770334	E270A
MamA	1-0006	0.396009617011816	E270A
MamA	1-0006	0.00489299802805817	E270A
MamA	1-0006	0.487987939384649	E270A
MamA	1-0006	0.390345318251905	E270A
MamA	1-0006	0.267185848954295	E270A
MamA	1-0006	-0.0341823812846684	E270A
MamA	1-0006	0.900370985217514	E270A
MamA	1-0006	0.817533684923086	E270A
MamA	1-0006	0.688699066246611	E270A
MamA	1-0006	0.77469517420281	E270A
MamA	1-0006	1.49275368252109	E270A
MamA	1-0006	1.00711537850484	E270A
MamA	1-0006	1.14468619370472	E270A
MamA	1-0006	0.93968390924234	E270A
MamA	1-0006	-0.0326597478547943	E270A
MamA	1-0006	0.286831361586735	E270A
MamA	1-0006	-0.433562962930002	E270A
MamA	1-0006	-0.168186247574098	E270A
MamA	1-0006	0.566437037069998	E270A
MamA	1-0006	0.128445552697508	E270A
MamA	1-0006	0.962767522355382	E270A
MamA	1-0006	0.428431094704193	E270A
MamA	1-0006	0.150059365803571	E270A
MamA	1-0006	0.198834880588906	E270A
MamA	1-0006	0.257261854253419	E270A
MamA	1-0006	0.118886724272663	E270A
MamA	1-0006	-0.128612702451989	E270A
MamA	1-0006	0.117515992539249	E270A
MamA	1-0006	0.596266391380758	E270A
MamA	1-0006	0.951271883517552	E270A
MamA	1-0006	0.368615850179565	E270A
MamA	1-0006	0.375513210126236	E270A
MamA	1-0006	0.345383543941848	E270A
MamA	1-0006	0.278269348083311	E270A
MamA	1-0006	0.429536184793378	E270A
MamA	1-0006	0.311017930423023	E270A
MamA	1-0006	1.27273824211008	E270A
MamA	1-0006	1.32711760818538	E270A
MamA	1-0006	0.600197442970673	E270A
MamA	1-0006	0.1311650540511	E270A
MamA	1-0006	1.1845055118181	E270A
MamA	1-0006	0.800550616048332	E270A
MamA	1-0006	0.324149709502629	E270A
MamA	1-0006	0.170032389570554	E270A
MamA	1-0006	1.73636203851231	E270A
MamA	1-0006	1.08492308177188	E270A
MamA	1-0006	1.35355747538755	E270A
MamA	1-0006	0.152738465999452	E270A
MamA	1-0006	1.24538775396513	E270A
MamA	1-0006	1.45472239252312	E270A
MamA	1-0006	0.944330274098706	E270A
MamA	1-0006	1.72290396479253	E270A
MamA	1-0006	0.259749260112513	E270A
MamA	1-0006	-0.301183171245567	E270A
MamA	1-0006	0.200130520586979	E270A
MamA	1-0006	0.278269348083311	E270A
MamA	1-0006	0.164733228274256	E270A
MamA	1-0006	0.214306289351346	E270A
MamA	1-0006	0.455807533635499	E270A
MamA	1-0006	0.442731658254998	E270A
MamA	1-0006	0.662619943504488	E270A
MamA	1-0006	0.796273426313343	E270A
MamA	1-0006	1.27396921064969	E270A
MamA	1-0006	0.856674132782305	E270A
MamA	1-0006	1.24161764282774	E270A
MamA	1-0006	0.589361171164838	E270A
MamA	1-0006	0.710683416082129	E270A
MamA	1-0006	0.770340522418221	E270A
MamA	1-0006	0.854207284006485	E270A
MamA	1-0006	1.06586101531949	E270A
MamA	1-0006	1.19429095544396	E270A
MamA	1-0006	1.57545078063499	E270A
MamA	1-0006	0.317001742572026	E270A
MamA	1-0006	1.04149300858421	E270A
MamA	1-0006	0.956647915975483	E270A
MamA	1-0006	0.727853180764261	E270A
MamA	1-0006	0.426218371815081	E270A
MamA	1-0006	0.409513881361564	E270A
MamA	1-0006	0.273353857669194	E270A
MamA	1-0006	1.06087760780523	E270A
MamA	1-0006	0.905145490537862	E270A
MamA	1-0006	1.19299005811425	E270A
MamA	1-0006	2.05301159305247	E270A
MamA	1-0006	1.78293297442927	E270A
MamA	1-0006	0.0573074623533038	E270A
MamA	1-0006	-0.163179782026328	E270A
MamA	1-0006	-0.0603160907576595	E270A
MamA	1-0006	0.559387204342763	E270A
MamA	1-0006	1.19299005811425	E270A
MamA	1-0006	0.735915452828234	E270A
MamA	1-0006	0.649401440971443	E270A
MamA	1-0006	1.21173921564755	E270A
MamA	1-0006	1.16074604460082	E270A
MamA	1-0006	1.50171291339405	E270A
MamA	1-0006	1.24350392992263	E270A
MamA	1-0006	1.47413113870925	E270A
MamA	1-0006	1.14199208453546	E270A
MamA	1-0006	-0.203726573686657	E270A
MamA	1-0006	1.37894956357517	E270A
MamA	1-0006	1.40502649036925	E270A
MamA	1-0006	0.676649503408547	E270A
MamA	1-0006	0.254770152354437	E270A
MamA	1-0006	1.02111150858619	E270A
MamA	1-0006	0.52671330865641	E270A
MamA	1-0006	1.30621294666117	E270A
MamA	1-0006	0.760713768197021	E270A
MamA	1-0006	0.420671671246085	E270A
MamA	1-0006	0.601178534501777	E270A
MamA	1-0006	-0.141683641609649	E270A
MamA	1-0006	0.779903465205571	E270A
MamA	1-0006	0.386936033386354	E270A
MamA	1-0006	0.29048529779295	E270A
MamA	1-0006	0.426218371815081	E270A
MamA	1-0006	0.987740050586844	E270A
MamA	1-0006	0.672921607171794	E270A
MamA	1-0006	1.2207040605495	E270A
MamA	1-0006	0.00340950685272754	E270A
MamA	1-0006	0.223255246078829	E270A
MamA	1-0006	0.503812906546331	E270A
MamA	1-0006	0.545183340966191	E270A
MamA	1-0006	1.4906375177986	E270A
MamA	1-0006	1.11614395720912	E270A
MamA	1-0006	1.08842562061505	E270A
MamA	1-0006	-0.181622386979793	E270A
MamA	1-0006	1.08422155244082	E270A
MamA	1-0006	0.718841939469293	E270A
MamA	1-0006	1.43284638519219	E270A
MamA	1-0006	1.3318535830281	E270A
MamA	1-0006	1.09610140435636	E270A
MamA	1-0006	0.964293376586342	E270A
MamA	1-0006	1.54058795383252	E270A
MamA	1-0006	0.628381671194806	E270A
MamA	1-0006	-0.057216852098773	E270A
MamA	1-0006	0.530838243677765	E270A
MamA	1-0006	0.671988126038684	E270A
MamA	1-0006	0.300184124511752	E270A
MamA	1-0006	0.366309382796396	E270A
MamA	1-0006	0.489048354750941	E270A
MamA	1-0006	1.16141134091922	E270A
MamA	1-0006	1.23720669146142	E270A
MamA	1-0006	0.901964243293182	E270A
MamA	1-0006	1.61532989308236	E270A
MamA	1-0006	0.692386467719527	E270A
MamA	1-0006	0.816689262867437	E270A
MamA	1-0006	0.880305362163409	E270A
MamA	1-0006	1.1534074644074	E270A
MamA	1-0006	1.15808178707376	E270A
MamA	1-0006	0.695145847025936	E270A
MamA	1-0006	0.420671671246085	E270A
MamA	1-0006	0.780769688612494	E270A
MamA	1-0006	1.23151557938357	E270A
MamA	1-0006	0.767721408160205	E270A
MamA	1-0006	0.651297229734239	E270A
MamA	1-0006	1.02769415897615	E270A
MamA	1-0006	-0.00851366052309176	E270A
MamA	1-0006	1.22580192818918	E270A
MamA	1-0006	0.00192448866613889	E270A
MamA	1-0006	0.224529149067462	E270A
MamA	1-0006	0.499609859026173	E270A
MamA	1-0006	0.480543127223484	E270A
MamA	1-0006	0.898775965662134	E270A
MamA	1-0006	0.545183340966191	E270A
MamA	1-0006	0.264711242788589	E270A
MamA	1-0006	0.632226297163311	E270A
MamA	1-0006	0.64750315774903	E270A
MamA	1-0006	1.40783274498075	E270A
MamA	1-0006	1.03424691077532	E270A
MamA	1-0006	1.1534074644074	E270A
MamA	1-0006	0.584408557166541	E270A
MamA	1-0006	0.302598677445052	E270A
MamA	1-0006	1.72155122672728	E270A
MamA	1-0006	0.518427887228339	E270A
MamA	1-0006	0.736808485998741	E270A
MamA	1-0006	-0.00701786459761061	E270A
MamA	1-0006	1.23468007953563	E270A
MamA	1-0006	0.971139819895499	E270A
MamA	1-0006	0.60215895930396	E270A
MamA	1-0006	0.0981877316048275	E270A
MamA	1-0006	-0.403733608619242	E270A
MamA	1-0006	0.431743828745029	E270A
MamA	1-0006	0.269656217778603	E270A
MamA	1-0006	0.0211115085861865	E270A
MamA	1-0006	1.36688634542792	E270A
MamA	1-0006	0.191036510028499	E270A
MamA	1-0006	0.154076152734964	E270A
MamA	1-0006	0.207880020191913	E270A
MamA	1-0006	0.243503929922634	E270A
MamA	1-0006	-0.143325867217695	E270A
MamA	1-0006	0.21814835564574	E270A
MamA	1-0006	0.429536184793378	E270A
MamA	1-0006	0.100964816275401	E270A
MamA	1-0006	0.347723682396365	E270A
MamA	1-0006	0.72875121692204	E270A
MamA	1-0006	0.193640653408657	E270A
MamA	1-0006	0.565432024809997	E270A
MamA	1-0006	0.576448840198064	E270A
MamA	1-0006	0.198834880588906	E270A
MamA	1-0006	0.407271930574894	E270A
MamA	1-0006	0.582422741242697	E270A
MamA	1-0006	1.35530302313938	E270A
MamA	1-0006	0.744821006050126	E270A
MamA	1-0006	0.863231848804467	E270A
MamA	1-0006	1.8566741327823	E270A
MamA	1-0006	1.6896218005543	E270A
MamA	1-0006	-0.013010375979303	E270A
MamA	1-0006	0.583415990879788	E270A
MamA	1-0006	0.137941464071372	E270A
MamA	1-0006	0.162076330578788	E270A
MamA	1-0006	1.00637496532929	E270A
MamA	1-0006	0.575450780634988	E270A
MamA	1-0006	0.891576474498429	E270A
MamA	1-0006	0.524646409963497	E270A
MamA	1-0006	0.183195756811316	E270A
MamA	1-0006	0.518427887228339	E270A
MamA	1-0006	1.33244448823435	E270A
MamA	1-0006	0.0967971820601723	E270A
MamA	1-0006	0.321770986719898	E270A
MamA	1-0006	0.763345623668572	E270A
MamA	1-0006	0.78250057669161	E270A
MamA	1-0006	0.417333385820863	E270A
MamA	1-0006	1.12025615488416	E270A
MamA	1-0006	1.15741495320893	E270A
MamA	1-0006	0.717032917237419	E270A
MamA	1-0006	0.275813696356999	E270A
MamA	1-0006	1.06515015300361	E270A
MamA	1-0006	0.209167566052373	E270A
MamA	1-0006	0.662619943504488	E270A
MamA	1-0006	-0.215770609391639	E270A
MamA	1-0006	1.1739940260395	E270A
MamA	1-0006	0.116143957209125	E270A
MamA	1-0006	0.285611323424479	E270A
MamA	1-0006	0.267185848954295	E270A
MamA	1-0006	0.393746565503247	E270A
MamA	1-0006	0.296554701111061	E270A
MamA	1-0006	0.88111336836817	E270A
MamA	1-0006	0.74215510746422	E270A
MamA	1-0006	1.07436415412475	E270A
MamA	1-0006	0.721551226727279	E270A
MamA	1-0006	0.950502240906134	E270A
MamA	1-0006	1.01449868551453	E270A
MamA	1-0006	0.187121460025116	E270A
MamA	1-0006	-0.205441006497909	E270A
MamA	1-0006	1.10926413949389	E270A
MamA	1-0006	1.07365747027967	E270A
MamA	1-0006	1.20142499805461	E270A
MamA	1-0006	0.796273426313343	E270A
MamA	1-0006	0.785956135327829	E270A
MamA	1-0006	0.542121376518127	E270A
MamA	1-0006	0.0530115930524738	E270A
MamA	1-0006	0.441636633503461	E270A
MamA	1-0006	0.791983518183977	E270A
MamA	1-0006	0.890774308761394	E270A
MamA	1-0006	1.01670632946619	E270A
MamA	1-0006	1.53905289955658	E270A
MamA	1-0006	0.0687009671044466	E270A
MamA	1-0006	0.402777549865688	E270A
MamA	1-0006	1.02330906429043	E270A
MamA	1-0006	0.938908058166428	E270A
MamA	1-0006	0.074364154124748	E270A
MamA	1-0006	0.938908058166428	E270A
MamA	1-0006	0.707042543384128	E270A
MamA	1-0006	0.339516536909852	E270A
MamA	1-0006	0.710683416082129	E270A
MamA	1-0006	0.851736209966638	E270A
MamA	1-0006	0.167385241963854	E270A
MamA	1-0006	0.594296841530989	E270A
MamA	1-0006	1.32652451669053	E270A
MamA	1-0006	0.532896296866846	E270A
MamA	1-0006	0.795416464576896	E270A
MamA	1-0006	1.16738524196385	E270A
MamA	1-0006	1.42400224996474	E270A
MamA	1-0006	1.04510245515269	E270A
MamA	1-0006	0.375513210126236	E270A
MamA	1-0006	0.357046461467428	E270A
MamA	1-0006	0.327710455960675	E270A
MamA	1-0006	0.658855570746734	E270A
MamA	1-0006	0.743044287794918	E270A
MamA	1-0006	0.910695849286081	E270A
MamA	1-0006	0.152738465999452	E270A
MamA	1-0006	0.447103464754638	E270A
MamA	1-0006	0.348892329718987	E270A
MamA	1-0006	0.341866203619608	E270A
MamA	1-0006	0.198834880588906	E270A
MamA	1-0006	0.828466430643791	E270A
MamA	1-0006	0.838485186468782	E270A
MamA	1-0006	0.0842215524408248	E270A
MamA	1-0006	-0.140043283228394	E270A
MamA	1-0006	0.689621800554299	E270A
MamA	1-0006	0.835153325771034	E270A
MamA	1-0006	0.36052703020239	E270A
MamA	1-0006	1.62886281011569	E270A
MamA	1-0006	1.20013052058698	E270A
MamA	1-0006	0.00785541188391967	E270A
MamA	1-0006	0.112020004784397	E270A
MamA	1-0006	0.345383543941848	E270A
MamA	1-0006	0.102351356546364	E270A
MamA	1-0006	0.125720915360972	E270A
MamA	1-0006	0.347723682396365	E270A
MamA	1-0006	0.373217752138574	E270A
MamA	1-0006	0.663559503968103	E270A
MamA	1-0006	0.749253252365387	E270A
MamA	1-0006	0.444919217492763	E270A
MamA	1-0006	0.575450780634988	E270A
MamA	1-0006	0.0587365808861038	E270A
MamA	1-0006	1.26533029237581	E270A
MamA	1-0006	1.90355574377547	E270A
MamA	1-0006	0.604117812342016	E270A
MamA	1-0006	1.18777470660222	E270A
MamA	1-0006	0.83097764979984	E270A
MamA	1-0006	1.55078011943649	E270A
MamA	1-0006	0.205301476090137	E270A
MamA	1-0006	0.141992084535456	E270A
MamA	1-0006	0.357046461467428	E270A
MamA	1-0006	0.492224932271119	E270A
MamA	1-0006	0.986238806912474	E270A
MamA	1-0006	0.63797409377363	E270A
MamA	1-0006	1.5246464099635	E270A
MamA	1-0006	1.32711760818538	E270A
MamA	1-0006	0.871387297548011	E270A
MamA	1-0006	0.964293376586342	E270A
MamA	1-0006	0.366309382796396	E270A
MamA	1-0006	0.330079413867159	E270A
MamA	1-0006	0.300184124511752	E270A
MamA	1-0006	0.862413762567128	E270A
MamA	1-0006	0.291701222888853	E270A
MamA	1-0006	0.533924223551507	E270A
MamA	1-0006	0.628381671194806	E270A
MamA	1-0006	0.778169456534216	E270A
MamA	1-0006	1.90871602869146	E270A
MamA	1-0006	0.75278927139263	E270A
MamA	1-0006	1.06799150309168	E270A
MamA	1-0006	0.492224932271119	E270A
MamA	1-0006	0.928002104194705	E270A
MamA	1-0006	0.828466430643791	E270A
MamA	1-0006	-0.343974168717305	E270A
MamA	1-0006	0.842639220553534	E270A
MamA	1-0006	0.32533760174009	E270A
MamA	1-0006	0.714315123577994	E270A
MamA	1-0006	0.792842520913069	E270A
MamA	1-0006	0.894780684679288	E270A
MamA	1-0006	0.492224932271119	E270A
MamA	1-0006	0.464459403888408	E270A
MamA	1-0006	0.686851825224855	E270A
MamA	1-0006	0.574452030134118	E270A
MamA	1-0006	0.312216680006649	E270A
MamA	1-0006	0.112020004784397	E270A
MamA	1-0006	0.275813696356999	E270A
MamA	1-0006	0.506957175951238	E270A
MamA	1-0006	-0.427547547512231	E270A
MamA	1-0006	0.817533684923086	E270A
MamA	1-0006	0.0672816900191125	E270A
MamA	1-0006	0.610952928535794	E270A
MamA	1-0006	0.0342469107753205	E270A
MamA	1-0006	0.737700966720608	E270A
MamA	1-0006	1.67245494210517	E270A
MamA	1-0006	0.185814078838329	E270A
MamA	1-0006	-0.14496996430832	E270A
MamA	1-0006	-0.0680934413493788	E270A
MamA	1-0006	0.705218655605317	E270A
MamA	1-0006	0.644651041418038	E270A
MamA	1-0006	0.901167834197115	E270A
MamA	1-0006	0.657912940826961	E270A
MamA	1-0006	-0.131869351782694	E270A
MamA	1-0006	0.070118849322642	E270A
MamA	1-0006	0.0196446095875273	E270A
MamA	1-0006	-0.169858937663955	E270A
MamA	1-0006	1.41621890523945	E270A
MamA	1-0006	1.54773002307654	E270A
MamA	1-0006	0.463380753340299	E270A
MamA	1-0006	0.521540499095675	E270A
MamA	1-0006	0.692386467719527	E270A
MamA	1-0006	1.12367405518189	E270A
MamA	1-0006	0.745708545321974	E270A
MamA	1-0006	1.14603136400347	E270A
MamA	1-0006	1.32593118127568	E270A
MamA	1-0006	0.286831361586735	E270A
MamA	1-0006	0.517388855825208	E270A
MamA	1-0006	0.95818025285973	E270A
MamA	1-0006	1.04077003435665	E270A
MamA	1-0006	1.1140834545391	E270A
MamA	1-0006	0.886756776115321	E270A
MamA	1-0006	0.97189853410751	E270A
MamA	1-0006	0.989988991090406	E270A
MamA	1-0006	0.992982135402389	E270A
MamA	1-0006	0.467690525151421	E270A
MamA	1-0006	0.607051114011736	E270A
MamA	1-0006	1.3152092034627	E270A
MamA	1-0006	0.638929837459388	E270A
MamA	1-0006	0.982478848983127	E270A
MamA	1-0006	0.428431094704193	E270A
MamA	1-0006	1.02037824552548	E270A
MamA	1-0006	1.47947643952913	E270A
MamA	1-0006	1.03061016813643	E270A
MamA	1-0006	1.10373656552545	E270A
MamA	1-0006	0.297765523709108	E270A
MamA	1-0006	0.535977882319482	E270A
MamA	1-0006	0.272122363748162	E270A
MamA	1-0006	0.00340950685272754	E270A
MamA	1-0006	0.173994026039503	E270A
MamA	1-0006	1.02915290029446	E270A
MamA	1-0006	-0.0160159917349226	E270A
MamA	1-0006	0.489048354750941	E270A
MamA	1-0006	0.79112400368677	E270A
MamA	1-0006	0.229613542139195	E270A
MamA	1-0006	0.815844346274685	E270A
MamA	1-0006	0.605096242383513	E270A
MamA	1-0006	1.68268686471613	E270A
MamA	1-0006	0.561404959973614	E270A
MamA	1-0006	1.0587365808861	E270A
MamA	1-0006	1.20594654430607	E270A
MamA	1-0006	0.936577998374519	E270A
MamA	1-0006	0.573452587738145	E270A
MamA	1-0006	2.48639585346892	E270A
MamA	1-0006	0.00192448866613889	E270A
MamA	1-0006	0.665436791208773	E270A
MamA	1-0006	0.454722392523121	E270A
MamA	1-0006	0.497503734504846	E270A
MamA	1-0006	0.187121460025116	E270A
MamA	1-0006	0.772954890468398	E270A
MamA	1-0006	0.78250057669161	E270A
MamA	1-0006	1.20852393675734	E270A
MamA	1-0006	0.206591324223341	E270A
MamA	1-0006	0.701563948037457	E270A
MamA	1-0006	0.409513881361564	E270A
MamA	1-0006	0.671988126038684	E270A
MamA	1-0006	0.592324599199384	E270A
MamA	1-0006	1.20981090833322	E270A
MamA	1-0006	1.05587692674686	E270A
MamA	1-0006	2.23404773455908	E270A
MamA	1-0006	1.24914803856365	E270A
MamA	1-0006	1.15474453126945	E270A
MamA	1-0006	0.497503734504846	E270A
MamA	1-0006	0.797985824189029	E270A
MamA	1-0006	0.672921607171794	E270A
MamA	1-0006	1.04654370905965	E270A
MamA	1-0006	0.854207284006485	E270A
MamA	1-0006	0.0152349422495172	E270A
MamA	1-0006	0.630305264867635	E270A
MamA	1-0006	0.724255435655657	E270A
MamA	1-0006	0.381235927034499	E270A
MamA	1-0006	1.78811166395366	E270A
MamA	1-0006	1.29837055413982	E270A
MamA	1-0006	0.348892329718987	E270A
MamA	1-0006	-0.11888663163183	E270A
MamA	1-0006	1.03352029527727	E270A
MamA	1-0006	1.41844700613157	E270A
MamA	1-0006	0.32533760174009	E270A
MamA	1-0006	0.66731163882921	E270A
MamA	1-0006	0.0269642348316243	E270A
MamA	1-0006	0.00489299802805817	E270A
MamA	1-0006	0.158081787073762	E270A
MamA	1-0006	0.978709066224403	E270A
MamA	1-0006	0.443825852498491	E270A
MamA	1-0006	0.346554087649786	E270A
MamA	1-0006	0.654136250081477	E270A
MamA	1-0006	0.772083960746272	E270A
MamA	1-0006	-0.00701786459761061	E270A
MamA	1-0006	0.664498452937718	E270A
MamA	1-0006	0.243503929922634	E270A
MamA	1-0006	0.86159521216736	E270A
MamA	1-0006	0.85585231843887	E270A
MamA	1-0006	0.783365242609545	E270A
MamA	1-0006	-0.21749942330839	E270A
MamA	1-0006	0.331262435697195	E270A
MamA	1-0006	-0.14496996430832	E270A
MamA	1-0006	0.480543127223484	E270A
MamA	1-0006	0.735021866524727	E270A
MamA	1-0006	0.62934378863019	E270A
MamA	1-0006	-0.071216159107279	E270A
MamA	1-0006	0.350060031151321	E270A
MamA	1-0006	0.173994026039503	E270A
MamA	1-0006	0.505909847381911	E270A
MamA	1-0006	1.17662908620747	E270A
MamA	1-0006	1.42122730192535	E270A
MamA	1-0006	1.22643789691928	E270A
MamA	1-0006	0.912277751901689	E270A
MamA	1-0006	0.682223348233139	E270A
MamA	1-0006	0.989988991090406	E270A
MamA	1-0006	0.561404959973614	E270A
MamA	1-0006	-0.207157479086931	E270A
MamA	1-0006	0.729648694425875	E270A
MamA	1-0006	0.0926174735618814	E270A
MamA	1-0006	0.560396434912698	E270A
MamA	1-0006	1.36919189132952	E270A
MamA	1-0006	0.592324599199384	E270A
MamA	1-0006	0.928002104194705	E270A
MamA	1-0006	1.37780502163423	E270A
MamA	1-0006	1.66637451957516	E270A
MamA	1-0006	-0.229659477581779	E270A
MamA	1-0006	0.514267264183497	E270A
MamA	1-0006	0.610952928535794	E270A
MamA	1-0006	1.83139576168246	E270A
MamA	1-0006	1.16008044134062	E270A
MamA	1-0006	0.196240104636039	E270A
MamA	1-0006	0.175312157735482	E270A
MamA	1-0006	0.82511132438541	E270A
MamA	1-0006	0.5287772504117	E270A
MamA	1-0006	0.249773800898719	E270A
MamA	1-0006	0.616785935299365	E270A
MamA	1-0006	0.159414530855274	E270A
MamA	1-0006	0.30621294666117	E270A
MamA	1-0006	0.918588073786832	E270A
MamA	1-0006	0.982478848983127	E270A
MamA	1-0006	1.63510305791887	E270A
MamA	1-0006	0.967340252145206	E270A
MamA	1-0006	0.298975330942175	E270A
MamA	1-0006	1.13794146407137	E270A
MamA	1-0006	1.26347234615523	E270A
MamA	1-0006	1.79798582418903	E270A
MamA	1-0006	1.24601514907868	E270A
MamA	1-0006	1.95127188351755	E270A
MamA	1-0006	1.53956476581737	E270A
MamA	1-0006	0.198834880588906	E270A
MamA	1-0006	0.00340950685272754	E270A
MamA	1-0006	0.938908058166428	E270A
MamA	1-0006	2.18385078294783	E270A
MamA	1-0006	0.66167977074988	E270A
MamA	1-0006	0.285611323424479	E270A
MamA	1-0006	0.191036510028499	E270A
MamA	1-0006	0.564426311948851	E270A
MamA	1-0006	-0.0372324776446184	E270A
MamA	1-0006	-0.626782247861426	E270A
MamA	1-0006	0.309818183958132	E270A
MamA	1-0006	0.829303989471895	E270A
MamA	1-0006	0.346554087649786	E270A
MamA	1-0006	0.942008962188584	E270A
MamA	1-0006	0.230881845553528	E270A
MamA	1-0006	0.301391906115058	E270A
MamA	1-0006	0.675718432036515	E270A
MamA	1-0006	0.0672816900191125	E270A
MamA	1-0006	2.0866754141152	E270A
MamA	1-0006	2.2178285739663	E270A
MamA	1-0006	1.46176126388206	E270A
MamA	1-0006	1.63270615582095	E270A
MamA	1-0006	-0.37065621136981	E270A
MamA	1-0006	-0.126987130402947	E270A
MamA	1-0006	0.319388335408904	E270A
MamA	1-0006	0.295342861442253	E270A
MamA	1-0006	1.50118743713951	E270A
MamA	1-0006	0.485864767491679	E270A
MamA	1-0006	0.275813696356999	E270A
MamA	1-0006	0.307415693742828	E270A
MamA	1-0006	0.249773800898719	E270A
MamA	1-0006	0.931126512651143	E270A
MamA	1-0006	0.741265378764488	E270A
MamA	1-0006	-0.0727800563237153	E270A
MamA	1-0006	0.361685356270949	E270A
MamA	1-0006	0.962767522355382	E270A
MamA	1-0006	0.398269124193941	E270A
MamA	1-0006	-0.362982283484389	E270A
MamA	1-0006	0.486926744014338	E270A
MamA	1-0006	0.695145847025936	E270A
MamA	1-0006	1.04293787103936	E270A
MamA	1-0006	1.32474377788281	E270A
MamA	1-0006	0.100964816275401	E270A
MamA	1-0006	0.275813696356999	E270A
MamA	1-0006	0.0814120188540007	E270A
MamA	1-0006	0.144686193704719	E270A
MamA	1-0006	0.717032917237419	E270A
MamA	1-0006	-0.0790526533392453	E270A
MamA	1-0006	0.277042044699309	E270A
MamA	1-0006	0.919374926842001	E270A
MamA	1-0006	0.38237775142405	E270A
MamA	1-0006	0.43064042904238	E270A
MamA	1-0006	0.451462063359535	E270A
MamA	1-0006	-0.168186247574098	E270A
MamA	1-0006	0.494338771537037	E270A
MamA	1-0006	0.179259342252145	E270A
MamA	1-0006	0.109264139493888	E270A
MamA	1-0006	0.435048973468701	E270A
MamA	1-0006	0.389209784906475	E270A
MamA	1-0006	1.0863251178792	E270A
MamA	1-0006	-0.220963278611961	E270A
MamA	1-0006	-0.0996290147824856	E270A
MamA	1-0006	0.338340266937728	E270A
MamA	1-0006	0.660738984905724	E270A
MamA	1-0006	0.362842753076617	E270A
MamA	1-0006	0.476271636195214	E270A
MamA	1-0006	0.747481987513194	E270A
MamA	1-0006	1.2007779045067	E270A
MamA	1-0006	0.408393341467648	E270A
MamA	1-0006	0.821748397359446	E270A
MamA	1-0006	1.14871794772377	E270A
MamA	1-0006	1.66684315529176	E270A
MamA	1-0006	1.17003238957055	E270A
MamA	1-0006	0.475201784428805	E270A
MamA	1-0006	1.38920978490647	E270A
MamA	1-0006	1.33007941386716	E270A
MamA	1-0006	0.0771874329922752	E270A
MamA	1-0006	0.547221046164965	E270A
MamA	1-0006	0.868130648217306	E270A
MamA	1-0006	0.355884403377303	E270A
MamA	1-0006	0.84097904195734	E270A
MamA	1-0006	0.873012869597053	E270A
MamA	1-0006	1.64322286604232	E270A
MamA	1-0006	1.6307857628041	E270A
MamA	1-0006	0.851736209966638	E270A
MamA	1-0006	0.562412780511203	E270A
MamA	1-0006	0.197538075970454	E270A
MamA	1-0006	1.08912510913343	E270A
MamA	1-0006	0.426218371815081	E270A
MamA	1-0006	0.0240408396248582	E270A
MamA	1-0006	0.506957175951238	E270A
MamA	1-0006	0.83931695071257	E270A
MamA	1-0006	0.447103464754638	E270A
MamA	1-0006	0.298975330942175	E270A
MamA	1-0006	0.99223443129605	E270A
MamA	1-0006	-0.0235575407475418	E270A
MamA	1-0006	0.593311057385434	E270A
MamA	1-0006	1.43284638519219	E270A
MamA	1-0006	0.107884230215192	E270A
MamA	1-0006	0.424002249964742	E270A
MamA	1-0006	0.80736785278961	E270A
MamA	1-0006	1.17531215773548	E270A
MamA	1-0006	-0.220963278611961	E270A
MamA	1-0006	-0.233152687619875	E270A
MamA	1-0006	-0.107621805536016	E270A
MamA	1-0006	-0.159851764308574	E270A
MamA	1-0006	0.0414930085842072	E270A
MamA	1-0006	0.622595453381488	E270A
MamA	1-0006	0.370918636048986	E270A
MamA	1-0006	-0.171533569356209	E270A
MamA	1-0006	-0.301183171245567	E270A
MamA	1-0006	0.583415990879788	E270A
MamA	1-0006	-0.207157479086931	E270A
MamA	1-0006	0.209167566052373	E270A
MamA	1-0006	0.700648822703323	E270A
MamA	1-0006	0.327710455960675	E270A
MamA	1-0006	0.677579974283038	E270A
MamA	1-0006	0.666374519575157	E270A
MamA	1-0006	0.662619943504488	E270A
MamA	1-0006	0.479476439529131	E270A
MamA	1-0006	0.486926744014338	E270A
MamA	1-0006	0.334805691774333	E270A
MamA	1-0006	0.340691848617126	E270A
MamA	1-0006	1.09957694215116	E270A
MamA	1-0006	-0.0821992086561093	E270A
MamA	1-0006	0.948961722830351	E270A
MamA	1-0006	1.07011884932264	E270A
MamA	1-0006	0.510094607504998	E270A
MamA	1-0006	2.30290021262033	E270A
MamA	1-0006	1.78552464286435	E270A
MamA	1-0006	0.21814835564574	E270A
MamA	1-0006	0.40502649036925	E270A
MamA	1-0006	0.870573824145635	E270A
MamA	1-0006	0.345383543941848	E270A
MamA	1-0006	0.140643140967437	E270A
MamA	1-0006	1.25601654123618	E270A
MamA	1-0006	0.301391906115058	E270A
MamA	1-0006	1.01523494224952	E270A
MamA	1-0006	-0.38807326444722	E270A
MamA	1-0006	1.10719378031406	E270A
MamA	1-0006	0.0342469107753205	E270A
MamA	1-0006	0.150059365803571	E270A
MamA	1-0006	0.897977794111546	E270A
MamA	1-0006	0.398269124193941	E270A
MamA	1-0006	0.747481987513194	E270A
MamA	1-0006	0.418447006131572	E270A
MamA	1-0006	0.868130648217306	E270A
MamA	1-0006	0.560396434912698	E270A
MamA	1-0006	-0.0326597478547943	E270A
MamA	1-0006	0.497503734504846	E270A
MamA	1-0006	0.735915452828234	E270A
MamA	1-0006	0.995222925458182	E270A
MamA	1-0006	1.03424691077532	E270A
MamA	1-0006	0.865683327798563	E270A
MamA	1-0006	0.432846385192187	E270A
MamA	1-0006	0.582422741242697	E270A
MamA	1-0006	1.14804677067473	E270A
MamA	1-0006	0.486926744014338	E270A
MamA	1-0006	0.120256154884161	E270A
MamA	1-0006	0.213023323467873	E270A
MamA	1-0006	1.91385792187444	E270A
MamA	1-0006	1.95664791597548	E270A
MamA	1-0006	0.589361171164838	E270A
MamA	1-0006	0.00637496532928879	E270A
MamA	1-0006	0.696982505505553	E270A
MamA	1-0006	1.39826912419394	E270A
MamA	1-0006	1.69606446854114	E270A
MamA	1-0006	0.85503003569168	E270A
MamA	1-0006	0.983984008265077	E270A
MamA	1-0006	0.968100966658422	E270A
MamA	1-0006	0.897977794111546	E270A
MamA	1-0006	1.0159708234391	E270A
MamA	1-0006	0.425110736412582	E270A
MamA	1-0006	0.209167566052373	E270A
MamA	1-0006	0.727853180764261	E270A
MamA	1-0006	-0.227916039253728	E270A
MamA	1-0006	1.21238141242685	E270A
MamA	1-0006	0.378949563575166	E270A
MamA	1-0006	1.34069184861713	E270A
MamA	1-0006	0.61192673555278	E270A
MamA	1-0006	-0.0853526416949836	E270A
MamA	1-0006	-0.407675400800616	E270A
MamA	1-0006	0.920947346660755	E270A
MamA	1-0006	1.52205861547434	E270A
MamA	1-0006	0.956647915975483	E270A
MamA	1-0006	1.50486175794904	E270A
MamA	1-0006	0.260991356651475	E270A
MamA	1-0006	0.7554356097211	E270A
MamA	1-0006	0.567441349704283	E270A
MamA	1-0006	0.796273426313343	E270A
MamA	1-0006	0.31819553249607	E270A
MamA	1-0006	0.0800051976397549	E270A
MamA	1-0006	0.463380753340299	E270A
MamA	1-0006	0.808217746799985	E270A
MamA	1-0006	0.565432024809997	E270A
MamA	1-0006	0.367463077412766	E270A
MamA	1-0006	0.320580152941276	E270A
MamA	1-0006	0.440540776982188	E270A
MamA	1-0006	-0.00851366052309176	E270A
MamA	1-0006	0.12435666462963	E270A
MamA	1-0006	1.02842371400606	E270A
MamA	1-0006	-0.181622386979793	E270A
MamA	1-0006	0.416218905239454	E270A
MamA	1-0006	0.127083877239283	E270A
MamA	1-0006	1.17003238957055	E270A
MamA	1-0006	1.66073898490572	E270A
MamA	1-0006	0.618725041829047	E270A
MamA	1-0006	0.685002215944731	E270A
MamA	1-0006	-0.00552361791728022	E270A
MamA	1-0006	0.772954890468398	E270A
MamA	1-0006	0.632226297163311	E270A
MamA	1-0006	0.0356990448092328	E270A
MamA	1-0006	0.406149647328187	E270A
MamA	1-0006	1.21750872138969	E270A
MamA	1-0006	0.143339767997202	E270A
MamA	1-0006	0.895580626502328	E270A
MamA	1-0006	0.273353857669194	E270A
MamA	1-0006	1.26780383784397	E270A
MamA	1-0006	1.08351968181599	E270A
MamA	1-0006	1.17267468891885	E270A
MamA	1-0006	0.858316358390351	E270A
MamA	1-0006	0.582422741242697	E270A
MamA	1-0006	0.582422741242697	E270A
MamA	1-0006	0.84097904195734	E270A
MamA	1-0006	0.586391643445643	E270A
MamA	1-0006	0.490107991259018	E270A
MamA	1-0006	0.736808485998741	E270A
MamA	1-0006	1.19364065340866	E270A
MamA	1-0006	0.864866630895413	E270A
MamA	1-0006	0.403902458336629	E270A
MamA	1-0006	0.188427657525741	E270A
MamA	1-0006	0.407271930574894	E270A
MamA	1-0006	0.172674688918851	E270A
MamA	1-0006	-0.33268836117079	E270A
MamA	1-0006	1.04365975999157	E270A
MamA	1-0006	0.696982505505553	E270A
MamA	1-0006	0.272122363748162	E270A
MamA	1-0006	0.569447879987245	E270A
MamA	1-0006	0.128445552697508	E270A
MamA	1-0006	0.352392602461211	E270A
MamA	1-0006	1.46876595944713	E270A
MamA	1-0006	0.99223443129605	E270A
MamA	1-0006	1.9213401839786	E270A
MamA	1-0006	1.58043418814924	E270A
MamA	1-0006	0.479476439529131	E270A
MamA	1-0006	0.439444087426611	E270A
MamA	1-0006	1.09331493310696	E270A
MamA	1-0006	0.114770615800432	E270A
MamA	1-0006	1.39657482565407	E270A
MamA	1-0006	1.06941008240056	E270A
MamA	1-0006	1.24224667926277	E270A
MamA	1-0006	0.309818183958132	E270A
MamA	1-0006	0.43614900786503	E270A
MamA	1-0006	0.280720827077407	E270A
MamA	1-0006	0.900370985217514	E270A
MamA	1-0006	-0.455836591943655	E270A
MamA	1-0006	0.0601642851499612	E270A
MamA	1-0006	0.624526772332414	E270A
MamA	1-0006	0.0122876581991804	E270A
MamA	1-0006	0.690543945066927	E270A
MamA	1-0006	0.406149647328187	E270A
MamA	1-0006	0.456891859158838	E270A
MamA	1-0006	0.344212049731404	E270A
MamA	1-0006	0.361685356270949	E270A
MamA	1-0006	0.520503707789186	E270A
MamA	1-0006	0.579438882803876	E270A
MamA	1-0006	1.36052703020239	E270A
MamA	1-0006	0.627418911705698	E270A
MamA	1-0006	0.475201784428805	E270A
MamA	1-0006	1.22707358542522	E270A
MamA	1-0006	0.574452030134118	E270A
MamA	1-0006	0.415103563057201	E270A
MamA	1-0006	0.93968390924234	E270A
MamA	1-0006	1.19299005811425	E270A
MamA	1-0006	0.964293376586342	E270A
MamA	1-0006	0.767721408160205	E270A
MamA	1-0006	1.01007323713374	E270A
MamA	1-0006	1.31819553249607	E270A
MamA	1-0006	0.504861757949045	E270A
MamA	1-0006	0.7554356097211	E270A
MamA	1-0006	0.541099275844211	E270A
MamA	1-0006	0.0371497186779579	E270A
MamA	1-0006	0.0644389402502872	E270A
MamA	1-0006	0.340691848617126	E270A
MamA	1-0006	-0.106019700939515	E270A
MamA	1-0006	0.871387297548011	E270A
MamA	1-0006	0.43614900786503	E270A
MamA	1-0006	0.238468340025336	E270A
MamA	1-0006	0.347723682396365	E270A
MamA	1-0006	0.455807533635499	E270A
MamA	1-0006	0.464459403888408	E270A
MamA	1-0006	0.457975370318209	E270A
MamA	1-0006	0.789403436946298	E270A
MamA	1-0006	1.49908361607272	E270A
MamA	1-0006	1.0159708234391	E270A
MamA	1-0006	1.31819553249607	E270A
MamA	1-0006	0.513225230883671	E270A
MamA	1-0006	0.359367773377549	E270A
MamA	1-0006	0.475201784428805	E270A
MamA	1-0006	-0.071216159107279	E270A
MamA	1-0006	1.07718743299228	E270A
MamA	1-0006	1.43559909551193	E270A
MamA	1-0006	0.075776484184568	E270A
MamA	1-0006	0.598233256090159	E270A
MamA	1-0006	-0.0433520840245167	E270A
MamA	1-0006	-0.256067079567877	E270A
MamA	1-0006	0.197538075970454	E270A
MamA	1-0006	0.315806964001968	E270A
MamA	1-0006	-0.0115099129830114	E270A
MamA	1-0006	0.264711242788589	E270A
MamA	1-0006	0.0658610153194851	E270A
MamA	1-0006	1.02257691759069	E270A
MamA	1-0006	-0.0464216490992789	E270A
MamA	1-0006	0.291701222888853	E270A
MamA	1-0006	0.441636633503461	E270A
MamA	1-0006	0.928783840892721	E270A
MamA	1-0006	0.648452611577895	E270A
MamA	1-0006	-0.447697247133638	E270A
MamA	1-0006	0.151399537791154	E270A
MamA	1-0006	0.158081787073762	E270A
MamA	1-0006	0.353557475387548	E270A
MamA	1-0006	0.152738465999452	E270A
MamA	1-0006	0.684076521308616	E270A
MamA	1-0006	1.22897897206479	E270A
MamA	1-0006	0.639884948411776	E270A
MamA	1-0006	-0.0774819454640188	E270A
MamA	1-0006	0.112020004784397	E270A
MamA	1-0006	0.197538075970454	E270A
MamA	1-0006	0.717032917237419	E270A
MamA	1-0006	0.705218655605317	E270A
MamA	1-0006	0.191036510028499	E270A
MamA	1-0006	0.150059365803571	E270A
MamA	1-0006	0.867315335937405	E270A
MamA	1-0006	0.339516536909852	E270A
MamA	1-0006	0.228344122751629	E270A
MamA	1-0006	1.13184412915937	E270A
MamA	1-0006	0.514267264183497	E270A
MamA	1-0006	1.11477061580043	E270A
MamA	1-0006	0.449284410054164	E270A
MamA	1-0006	-0.173210147163593	E270A
MamA	1-0006	0.317001742572026	E270A
MamA	1-0006	-0.411627992426116	E270A
MamA	1-0006	0.0630154620480847	E270A
MamA	1-0006	0.587382165311459	E270A
MamA	1-0006	0.825950832725008	E270A
MamA	1-0006	0.920947346660755	E270A
MamA	1-0006	0.781635392233363	E270A
MamA	1-0006	1.05085885198024	E270A
MamA	1-0006	1.10442867157897	E270A
MamA	1-0006	0.450373647584871	E270A
MamA	1-0006	0.803963261142588	E270A
MamA	1-0006	0.889168637988094	E270A
MamA	1-0006	1.39713981294967	E270A
MamA	1-0006	0.719745600658179	E270A
MamA	1-0006	0.756316644887955	E270A
MamA	1-0006	0.547221046164965	E270A
MamA	1-0006	-0.0464216490992789	E270A
MamA	1-0006	0.0940120556336341	E270A
MamA	1-0006	-0.472254351377617	E270A
MamA	1-0006	0.455807533635499	E270A
MamA	1-0006	0.36052703020239	E270A
MamA	1-0006	0.623561436036184	E270A
MamA	1-0006	0.401651763588593	E270A
MamA	1-0006	0.693306847362155	E270A
MamA	1-0006	0.0884256206150549	E270A
MamA	1-0006	0.483738466383291	E270A
MamA	1-0006	-0.178251602640554	E270A
MamA	1-0006	0.132522884778051	E270A
MamA	1-0006	0.133879438748136	E270A
MamA	1-0006	0.363999222109195	E270A
MamA	1-0006	0.163405391051308	E270A
MamA	1-0006	-0.031138719731944	E270A
MamA	1-0006	0.55736662272271	E270A
MamA	1-0006	0.511138903635205	E270A
MamA	1-0006	0.0196446095875273	E270A
MamA	1-0006	0.535977882319482	E270A
MamA	1-0006	0.525680229456599	E270A
MamA	1-0006	1.36573218933365	E270A
MamA	1-0006	0.9381317896296	E270A
MamA	1-0006	0.194940964484415	E270A
MamA	1-0006	0.330079413867159	E270A
MamA	1-0006	-0.135133369104587	E270A
MamA	1-0006	0.565432024809997	E270A
MamA	1-0006	0.656969694607751	E270A
MamA	1-0006	1.40334011374136	E270A
MamA	1-0006	1.46876595944713	E270A
MamA	1-0006	-0.109225691238606	E270A
MamA	1-0006	0.987740050586844	E270A
MamA	1-0006	1.9063366520539	E270A
MamA	1-0006	1.17003238957055	E270A
MamA	1-0006	0.623561436036184	E270A
MamA	1-0006	0.128445552697508	E270A
MamA	1-0006	0.986989624020697	E270A
MamA	1-0006	-0.0853526416949836	E270A
MamA	1-0006	0.281945006226709	E270A
MamA	1-0006	-0.233152687619875	E270A
MamA	1-0006	0.117515992539249	E270A
MamA	1-0006	0.694226640215044	E270A
MamA	1-0006	0.358207584299432	E270A
MamA	1-0006	0.24476008589306	E270A
MamA	1-0006	0.183195756811316	E270A
MamA	1-0006	0.972656849520969	E270A
MamA	1-0006	0.624526772332414	E270A
MamA	1-0006	0.85585231843887	E270A
MamA	1-0006	0.348892329718987	E270A
MamA	1-0006	-0.114048074695449	E270A
MamA	1-0006	-0.0885129825883116	E270A
MamA	1-0006	0.339516536909852	E270A
MamA	1-0006	0.453636434593872	E270A
MamA	1-0006	-0.229659477581779	E270A
MamA	1-0006	0.127083877239283	E270A
MamA	1-0006	0.512182444397441	E270A
MamA	1-0006	0.657912940826961	E270A
MamA	1-0006	1.32474377788281	E270A
MamA	1-0006	0.567441349704283	E270A
MamA	1-0006	0.852560371680504	E270A
MamA	1-0006	0.159414530855274	E270A
MamA	1-0006	0.514267264183497	E270A
MamA	1-0006	0.482674139488181	E270A
MamA	1-0006	0.314611195147031	E270A
MamA	1-0006	0.106502999816831	E270A
MamA	1-0006	0.0954052909335006	E270A
MamA	1-0006	0.393746565503247	E270A
MamA	1-0006	0.170032389570554	E270A
MamA	1-0006	0.442731658254998	E270A
MamA	1-0006	0.654136250081477	E270A
MamA	1-0006	0.64750315774903	E270A
MamA	1-0006	0.317001742572026	E270A
MamA	1-0006	0.00637496532928879	E270A
MamA	1-0006	0.798841261534512	E270A
MamA	1-0006	0.451462063359535	E270A
MamA	1-0006	-0.190083965727989	E270A
MamA	1-0006	0.560396434912698	E270A
MamA	1-0006	0.0269642348316243	E270A
MamA	1-0006	-0.200303808045868	E270A
MamA	1-0006	0.811612324932909	E270A
MamA	1-0006	1.55433043421334	E270A
MamA	1-0006	1.11683013797873	E270A
MamA	1-0006	0.480543127223484	E270A
MamA	1-0006	-0.02810146589249	E270A
MamA	1-0006	0.103736565525455	E270A
MamA	1-0006	0.876258529100707	E270A
MamA	1-0006	1.38693603338635	E270A
MamA	1-0006	0.72875121692204	E270A
MamA	1-0006	1.17531215773548	E270A
MamA	1-0006	1.47787492775591	E270A
MamA	1-0006	0.0729504401058046	E270A
MamA	1-0006	0.278269348083311	E270A
MamA	1-0006	-0.123741470899293	E270A
MamA	1-0006	0.846781328023873	E270A
MamA	1-0006	0.234680079535628	E270A
MamA	1-0006	-0.130240108198035	E270A
MamA	1-0006	0.757197142346406	E270A
MamA	1-0006	0.240988332003851	E270A
MamA	1-0006	0.188427657525741	E270A
MamA	1-0006	0.639884948411776	E270A
MamA	1-0006	0.558377267276046	E270A
MamA	1-0006	0.808217746799985	E270A
MamA	1-0006	0.494338771537037	E270A
MamA	1-0006	0.279495608285391	E270A
MamA	1-0006	0.0912215421120061	E270A
MamA	1-0006	0.181884811658969	E270A
MamA	1-0006	0.164733228274256	E270A
MamA	1-0006	0.354721408521184	E270A
MamA	1-0006	-0.0326597478547943	E270A
MamA	1-0006	0.941234360805741	E270A
MamA	1-0006	0.652244190740269	E270A
MamA	1-0006	0.268421562126964	E270A
MamA	1-0006	-0.0696539553369957	E270A
MamA	1-0006	0.280720827077407	E270A
MamA	1-0006	0.868945499998861	E270A
MamA	1-0006	0.400525098134309	E270A
MamA	1-0006	1.62838167119481	E270A
MamA	1-0006	0.0225769175906853	E270A
MamA	1-0006	0.440540776982188	E270A
MamA	1-0006	0.502763292065047	E270A
MamA	1-0006	1.13048565915232	E270A
MamA	1-0006	0.589361171164838	E270A
MamA	1-0006	0.909904247048998	E270A
MamA	1-0006	0.735915452828234	E270A
MamA	1-0006	0.745708545321974	E270A
MamA	1-0006	0.876258529100707	E270A
MamA	1-0006	0.184505511818104	E270A
MamA	1-0006	0.632226297163311	E270A
MamA	1-0006	-0.0296192935347432	E270A
MamA	1-0006	0.814998934565237	E270A
MamA	1-0006	0.366309382796396	E270A
MamA	1-0006	0.317001742572026	E270A
MamA	1-0006	1.5032881947599	E270A
MamA	1-0006	1.24098833200385	E270A
MamA	1-0006	0.736808485998741	E270A
MamA	1-0006	0.240988332003851	E270A
MamA	1-0006	0.297765523709108	E270A
MamA	1-0006	0.0615905779412568	E270A
MamA	1-0006	0.675718432036515	E270A
MamA	1-0006	-0.013010375979303	E270A
MamA	1-0006	0.344212049731404	E270A
MamA	1-0006	-0.812878539974884	E270A
MamA	1-0006	1.27704204469931	E270A
MamA	1-0006	1.1009648162754	E270A
MamA	1-0006	0.156747810981597	E270A
MamA	1-0006	-0.0525804419780542	E270A
MamA	1-0006	0.805666561270653	E270A
MamA	1-0006	1.52154049909567	E270A
MamA	1-0006	1.22834412275163	E270A
MamA	1-0006	1.07648213107606	E270A
MamA	1-0006	1.30199541795857	E270A
MamA	1-0006	1.2862214714737	E270A
MamA	1-0006	1.04221562069092	E270A
MamA	1-0006	0.959710963922043	E270A
MamA	1-0006	0.90435083613006	E270A
MamA	1-0006	0.980972117732972	E270A
MamA	1-0006	0.074364154124748	E270A
MamA	1-0006	0.595281952556557	E270A
MamA	1-0006	-0.0790526533392453	E270A
MamA	1-0006	0.730545613970393	E270A
MamA	1-0006	0.441636633503461	E270A
MamA	1-0006	0.416218905239454	E270A
MamA	1-0006	0.0615905779412568	E270A
MamA	1-0006	-0.0837750635816485	E270A
MamA	1-0006	0.735915452828234	E270A
MamA	1-0006	0.0898242586702008	E270A
MamA	1-0006	1.01081175521533	E270A
MamA	1-0006	1.12708387723928	E270A
MamA	1-0006	-0.284778376209404	E270A
MamA	1-0006	0.171354144166799	E270A
MamA	1-0006	0.593311057385434	E270A
MamA	1-0006	0.897179180727805	E270A
MamA	1-0006	0.204010473730262	E270A
MamA	1-0006	1.51166076836902	E270A
MamA	1-0006	0.61192673555278	E270A
MamA	1-0006	0.401651763588593	E270A
MamA	1-0006	0.106502999816831	E270A
MamA	1-0006	0.353557475387548	E270A
MamA	1-0006	0.873012869597053	E270A
MamA	1-0006	1.89917488590272	E270A
MamA	1-0006	0.398269124193941	E270A
MamA	1-0006	0.99447638208272	E270A
MamA	1-0006	0.0211115085861865	E270A
MamA	1-0006	0.779036721388039	E270A
MamA	1-0006	0.626455509305364	E270A
MamA	1-0006	1.31221668000665	E270A
MamA	1-0006	0.918588073786832	E270A
MamA	1-0006	0.772954890468398	E270A
MamA	1-0006	0.482674139488181	E270A
MamA	1-0006	1.19364065340866	E270A
MamA	1-0006	0.183195756811316	E270A
MamA	1-0006	0.822589864307121	E270A
MamA	1-0006	0.234680079535628	E270A
MamA	1-0006	0.429536184793378	E270A
MamA	1-0006	0.00043794032143666	E270A
MamA	1-0006	0.698816828754433	E270A
MamA	1-0006	0.0515767893132375	E270A
MamA	1-0006	0.439444087426611	E270A
MamA	1-0006	0.1229911226054	E270A
MamA	1-0006	0.151399537791154	E270A
MamA	1-0006	-0.224435470518766	E270A
MamA	1-0006	0.0967971820601723	E270A
MamA	1-0006	-0.109225691238606	E270A
MamA	1-0006	0.143339767997202	E270A
MamA	1-0006	-0.238408413071371	E270A
MamA	1-0006	-0.0115099129830114	E270A
MamA	1-0006	0.914647358305016	E270A
MamA	1-0006	0.89638012502148	E270A
MamA	1-0006	1.12162428684149	E270A
MamA	1-0006	0.506957175951238	E270A
MamA	1-0006	0.589361171164838	E270A
MamA	1-0006	0.653190530584558	E270A
MamA	1-0006	0.464459403888408	E270A
MamA	1-0006	-0.21231918420271	E270A
MamA	1-0006	0.669184053161981	E270A
MamA	1-0006	0.307415693742828	E270A
MamA	1-0006	0.196240104636039	E270A
MamA	1-0006	0.341866203619608	E270A
MamA	1-0006	0.171354144166799	E270A
MamA	1-0006	0.820906439330946	E270A
MamA	1-0006	0.905145490537862	E270A
MamA	1-0006	0.867315335937405	E270A
MamA	1-0006	0.369767702568807	E270A
MamA	1-0006	0.569447879987245	E270A
MamA	1-0006	1.40165176358859	E270A
MamA	1-0006	0.456891859158838	E270A
MamA	1-0006	0.314611195147031	E270A
MamA	1-0006	0.857495479255323	E270A
MamA	1-0006	-0.0680934413493788	E270A
MamA	1-0006	0.710683416082129	E270A
MamA	1-0006	1.02623394119877	E270A
MamA	1-0006	0.0814120188540007	E270A
MamA	1-0006	0.792842520913069	E270A
MamA	1-0006	0.0414930085842072	E270A
MamA	1-0006	0.0385989353150276	E270A
MamA	1-0006	0.401651763588593	E270A
MamA	1-0006	1.65649784013392	E270A
MamA	1-0006	1.62162882350218	E270A
MamA	1-0006	0.895580626502328	E270A
MamA	1-0006	0.95818025285973	E270A
MamA	1-0006	0.700648822703323	E270A
MamA	1-0006	0.489048354750941	E270A
MamA	1-0006	0.242246679262772	E270A
MamA	1-0006	-0.0634220016254811	E270A
MamA	1-0006	0.197538075970454	E270A
MamA	1-0006	-0.117271975569736	E270A
MamA	1-0006	1.93151658837094	E270A
MamA	1-0006	1.33716303713688	E270A
MamA	1-0006	0.074364154124748	E270A
MamA	1-0006	1.039322998086	E270A
MamA	1-0006	0.107884230215192	E270A
MamA	1-0006	0.97189853410751	E270A
MamA	1-0006	1.81415302715848	E270A
MamA	1-0006	0.725155713401495	E270A
MamA	1-0006	0.984735999442327	E270A
MamA	1-0006	0.619693618596471	E270A
MamA	1-0006	1.13996819590676	E270A
MamA	1-0006	0.876258529100707	E270A
MamA	1-0006	1.37149375865612	E270A
MamA	1-0006	1.66214993371343	E270A
MamA	1-0006	1.24977380089872	E270A
MamA	1-0006	0.895580626502328	E270A
MamA	1-0006	-0.297521506739595	E270A
MamA	1-0006	0.413987357940872	E270A
MamA	1-0006	0.0530115930524738	E270A
MamA	1-0006	-0.222698329982709	E270A
MamA	1-0006	1.37665957096596	E270A
MamA	1-0006	2.19753807597045	E270A
MamA	1-0006	1.17333450829504	E270A
MamA	1-0006	0.375513210126236	E270A
MamA	1-0006	1.22452914906746	E270A
MamA	1-0006	0.571451623421694	E270A
MamA	1-0006	0.351226788223316	E270A
MamA	1-0006	0.927219943676285	E270A
MamA	1-0006	0.146031364003469	E270A
MamA	1-0006	0.191036510028499	E270A
MamA	1-0006	0.0884256206150549	E270A
MamA	1-0006	0.0327933136338219	E270A
MamA	1-0006	1.01817621756164	E270A
MamA	1-0006	-0.151565153123613	E270A
MamA	1-0006	0.620661545530389	E270A
MamA	1-0006	0.21045396385574	E270A
MamA	1-0006	0.110642730177755	E270A
MamA	1-0006	-0.102820819272195	E270A
MamA	1-0006	0.335984845939598	E270A
MamA	1-0006	0.551287842489727	E270A
MamA	1-0006	0.00637496532928879	E270A
MamA	1-0006	-0.176569159253508	E270A
MamA	1-0006	0.910695849286081	E270A
MamA	1-0006	0.33244448823435	E270A
MamA	1-0006	0.224529149067462	E270A
MamA	1-0006	0.535977882319482	E270A
MamA	1-0006	0.386936033386354	E270A
MamA	1-0006	0.400525098134309	E270A
MamA	1-0006	-0.407675400800616	E270A
MamA	1-0006	0.83097764979984	E270A
MamA	1-0006	0.609978463763259	E270A
MamA	1-0006	0.0240408396248582	E270A
MamA	1-0006	0.355884403377303	E270A
MamA	1-0006	1.33539538932634	E270A
MamA	1-0006	0.487987939384649	E270A
MamA	1-0006	0.658855570746734	E270A
MamA	1-0006	0.772954890468398	E270A
MamA	1-0006	0.779036721388039	E270A
MamA	1-0006	0.882728024430264	E270A
MamA	1-0006	0.588372007573884	E270A
MamA	1-0006	0.828466430643791	E270A
MamA	1-0006	1.00118140596061	E270A
MamA	1-0006	0.315806964001968	E270A
MamA	1-0006	0.315806964001968	E270A
MamA	1-0006	1.09470884146746	E270A
MamA	1-0006	0.949732187489992	E270A
MamA	1-0006	0.183195756811316	E270A
MamA	1-0006	0.80225794765693	E270A
MamA	1-0006	0.198834880588906	E270A
MamA	1-0006	0.433948099671759	E270A
MamA	1-0006	0.172674688918851	E270A
MamA	1-0006	0.0912215421120061	E270A
MamA	1-0006	1.2843902526441	E270A
MamA	1-0006	1.16274101386209	E270A
MamA	1-0006	-0.0587656391942595	E270A
MamA	1-0006	0.89638012502148	E270A
MamA	1-0006	-0.198595465583507	E270A
MamA	1-0006	0.187121460025116	E270A
MamA	1-0006	0.811612324932909	E270A
MamA	1-0006	-0.102820819272195	E270A
MamA	1-0006	1.60019744297067	E270A
MamA	1-0006	-0.102820819272195	E270A
MamA	1-0006	0.729648694425875	E270A
MamA	1-0006	-0.0821992086561093	E270A
MamA	1-0006	0.432846385192187	E270A
MamA	1-0006	1.27888260847124	E270A
MamA	1-0006	0.577446209778671	E270A
MamA	1-0006	0.45254965861714	E270A
MamA	1-0006	0.713408053418664	E270A
MamA	1-0006	0.353557475387548	E270A
MamA	1-0006	0.383518672828619	E270A
MamA	1-0006	0.500661769419759	E270A
MamA	1-0006	0.239728886231253	E270A
MamA	1-0006	1.00859506585597	E270A
MamA	1-0006	0.307415693742828	E270A
MamA	1-0006	0.498557181094836	E270A
MamA	1-0006	1.19168798668933	E270A
MamA	1-0006	1.58440855716654	E270A
MamA	1-0006	0.695145847025936	E270A
MamA	1-0006	0.995222925458182	E270A
MamA	1-0006	0.653190530584558	E270A
MamA	1-0006	1.61630075115459	E270A
MamA	1-0006	0.375513210126236	E270A
MamA	1-0006	0.886756776115321	E270A
MamA	1-0006	1.48904835475094	E270A
MamA	1-0006	1.84263922055353	E270A
MamA	1-0006	-0.241922897247607	E270A
MamA	1-0006	1.12844555269751	E270A
MamA	1-0006	1.16207633057879	E270A
MamA	1-0006	1.13455723769924	E270A
MamA	1-0006	0.500661769419759	E270A
MamA	1-0006	-0.0556697259012945	E270A
MamA	1-0006	1.63606070484477	E270A
MamA	1-0006	0.856674132782305	E270A
MamA	1-0006	1.60362834837095	E270A
MamA	1-0006	0.841809370061347	E270A
MamA	1-0006	1.44491921749276	E270A
MamA	1-0006	1.56291642689121	E270A
MamA	1-0006	1.0877257927862	E270A
MamA	1-0006	0.129805944161711	E270A
MamA	1-0006	0.929565154229385	E270A
MamA	1-0006	0.473059697857264	E270A
MamA	1-0006	0.968861280268056	E270A
MamA	1-0006	0.963530651196708	E270A
MamA	1-0006	0.32533760174009	E270A
MamA	1-0006	0.438346563569276	E270A
MamA	1-0006	0.543142753580886	E270A
MamA	1-0006	1.2007779045067	E270A
MamA	1-0006	0.200130520586979	E270A
MamA	1-0006	-0.149913527252455	E270A
MamA	1-0006	0.517388855825208	E270A
MamA	1-0006	0.842639220553534	E270A
MamA	1-0006	0.955113949811946	E270A
MamA	1-0006	0.449284410054164	E270A
MamA	1-0006	-0.193482542189854	E270A
MamA	1-0006	0.171354144166799	E270A
MamA	1-0006	0.75278927139263	E270A
MamA	1-0006	0.384658692675288	E270A
MamA	1-0006	0.294130002992603	E270A
MamA	1-0006	0.530838243677765	E270A
MamA	1-0006	0.944330274098706	E270A
MamA	1-0006	1.01007323713374	E270A
MamA	1-0006	0.671054040515027	E270A
MamA	1-0006	0.116143957209125	E270A
MamA	1-0006	-0.351547388422105	E270A
MamA	1-0006	0.518427887228339	E270A
MamA	1-0006	1.1693710578877	E270A
MamA	1-0006	1.68175968278133	E270A
MamA	1-0006	0.302598677445052	E270A
MamA	1-0006	0.845953857372632	E270A
MamA	1-0006	0.129805944161711	E270A
MamA	1-0006	0.555343207186413	E270A
MamA	1-0006	0.621628823502185	E270A
MamA	1-0006	0.793701012483114	E270A
MamA	1-0006	0.176629086207473	E270A
MamA	1-0006	-0.123741470899293	E270A
MamA	1-0006	0.279495608285391	E270A
MamA	1-0006	-0.0680934413493788	E270A
MamA	1-0006	0.495394530853007	E270A
MamA	1-0006	-0.0372324776446184	E270A
MamA	1-0006	0.840148235691426	E270A
MamA	1-0006	-0.0525804419780542	E270A
MamA	1-0006	1.31998436724588	E270A
MamA	1-0006	1.19364065340866	E270A
MamA	1-0006	0.415103563057201	E270A
MamA	1-0006	0.297765523709108	E270A
MamA	1-0006	0.213023323467873	E270A
MamA	1-0006	0.0530115930524738	E270A
MamA	1-0006	1.28133304649711	E270A
MamA	1-0006	1.44382585249849	E270A
MamA	1-0006	0.935022531872478	E270A
MamA	1-0006	1.67245494210517	E270A
MamA	1-0006	1.00859506585597	E270A
MamA	1-0006	0.567441349704283	E270A
MamA	1-0006	0.162076330578788	E270A
MamA	1-0006	1.12435666462963	E270A
MamA	1-0006	0.0672816900191125	E270A
MamA	1-0006	1.09818773160483	E270A
MamA	1-0006	0.396009617011816	E270A
MamA	1-0006	0.393746565503247	E270A
MamA	1-0006	0.0167063294661854	E270A
MamA	1-0006	0.980218161593059	E270A
MamA	1-0006	0.593311057385434	E270A
MamA	1-0006	1.20788002019191	E270A
MamA	1-0006	0.417333385820863	E270A
MamA	1-0006	-0.0510382771696487	E270A
MamA	1-0006	0.872200312526353	E270A
MamA	1-0006	0.5287772504117	E270A
MamA	1-0006	-0.649939968848679	E270A
MamA	1-0006	0.409513881361564	E270A
MamA	1-0006	-0.890735860506112	E270A
MamA	1-0006	0.132522884778051	E270A
MamA	1-0006	-0.904594709066499	E270A
MamA	1-0006	0.834319156889229	E270A
MamA	1-0006	0.320580152941276	E270A
MamA	1-0006	-0.297521506739595	E270A
MamA	1-0006	0.470914426025707	E270A
MamA	1-0006	0.597250158920337	E270A
MamA	1-0006	0.539052899556583	E270A
MamA	1-0006	0.193640653408657	E270A
MamA	1-0006	0.389209784906475	E270A
MamA	1-0006	0.532896296866846	E270A
MamA	1-0006	0.497503734504846	E270A
MamA	1-0006	0.627418911705698	E270A
MamA	1-0006	0.496449518132845	E270A
MamA	1-0006	-0.14496996430832	E270A
MamA	1-0006	1.2616120041297	E270A
MamA	1-0006	1.2149473447011	E270A
MamA	1-0006	-0.52265930481486	E270A
MamA	1-0006	-0.227916039253728	E270A
MamA	1-0006	0.390345318251905	E270A
MamA	1-0006	0.793701012483114	E270A
MamA	1-0006	0.168709422911235	E270A
MamA	1-0006	0.00192448866613889	E270A
MamA	1-0006	0.951271883517552	E270A
MamA	1-0006	1.10165825298228	E270A
MamA	1-0006	0.328895421153279	E270A
MamA	1-0006	0.418447006131572	E270A
MamA	1-0006	0.346554087649786	E270A
MamA	1-0006	0.272122363748162	E270A
MamA	1-0006	0.0785970032469467	E270A
MamA	1-0006	0.232149034955059	E270A
MamA	1-0006	0.650349646750492	E270A
MamA	1-0006	0.821748397359446	E270A
MamA	1-0006	-0.195184837420855	E270A
MamA	1-0006	0.385797812387756	E270A
MamA	1-0006	0.341866203619608	E270A
MamA	1-0006	0.303804440190449	E270A
MamA	1-0006	0.359367773377549	E270A
MamA	1-0006	0.249773800898719	E270A
MamA	1-0006	0.545183340966191	E270A
MamA	1-0006	0.243503929922634	E270A
MamA	1-0006	0.451462063359535	E270A
MamA	1-0006	0.205301476090137	E270A
MamA	1-0006	0.706130887719739	E270A
MamA	1-0006	0.834319156889229	E270A
MamA	1-0006	0.437248204139834	E270A
MamA	1-0006	0.521540499095675	E270A
MamA	1-0006	1.15407615273496	E270A
MamA	1-0006	0.710683416082129	E270A
MamA	1-0006	1.53751621021454	E270A
MamA	1-0006	0.66167977074988	E270A
MamA	1-0006	1.13184412915937	E270A
MamA	1-0006	0.518427887228339	E270A
MamA	1-0006	1.05587692674686	E270A
MamA	1-0006	1.52826154172314	E270A
MamA	1-0006	0.906733487441054	E270A
MamA	1-0006	0.623561436036184	E270A
MamA	1-0006	0.906733487441054	E270A
MamA	1-0006	1.3988334484886	E270A
MamA	1-0006	0.52671330865641	E270A
MamA	1-0006	0.47413113870925	E270A
MamA	1-0006	0.669184053161981	E270A
MamA	1-0006	0.0800051976397549	E270A
MamA	1-0006	1.78336524260955	E270A
MamA	1-0006	1.55736662272271	E270A
MamA	1-0006	0.454722392523121	E270A
MamA	1-0006	1.15273846599945	E270A
MamA	1-0006	1.14535893563385	E270A
MamA	1-0006	1.06159057794126	E270A
MamA	1-0006	-0.687783319993351	E270A
MamA	1-0006	-0.120503096832749	E270A
MamA	1-0006	0.43614900786503	E270A
MamA	1-0006	-0.275744564344343	E270A
MamA	1-0006	-0.0235575407475418	E270A
MamA	1-0006	0.794558993502091	E270A
MamA	1-0006	0.525680229456599	E270A
MamA	1-0006	1.20594654430607	E270A
MamA	1-0006	0.858316358390351	E270A
MamA	1-0006	0.351226788223316	E270A
MamA	1-0006	1.29048529779295	E270A
MamA	1-0006	0.913857921874435	E270A
MamA	1-0006	0.697899958662633	E270A
MamA	1-0006	0.0515767893132375	E270A
MamA	1-0006	0.551287842489727	E270A
MamA	1-0006	1.1433397679972	E270A
MamA	1-0006	-0.115659124601435	E270A
MamA	1-0006	0.301391906115058	E270A
MamA	1-0006	0.370918636048986	E270A
MamA	1-0006	-0.21749942330839	E270A
MamA	1-0006	0.593311057385434	E270A
MamA	1-0006	0.723354595763204	E270A
MamA	1-0006	0.584408557166541	E270A
MamA	1-0006	0.737700966720608	E270A
MamA	1-0006	0.110642730177755	E270A
MamA	1-0006	0.521540499095675	E270A
MamA	1-0006	1.275813696357	E270A
MamA	1-0006	0.901167834197115	E270A
MamA	1-0006	0.0615905779412568	E270A
MamA	1-0006	0.170032389570554	E270A
MamA	1-0006	0.569447879987245	E270A
MamA	1-0006	0.311017930423023	E270A
MamA	1-0006	0.38237775142405	E270A
[truncated: 790,047 more rows]
