# Supplementary material for: Drivers and sites of diversity in the DNA adenine methylomes of 93 Mycobacterium tuberculosis complex clinical isolates
Source: eLife. 2020 Oct 27;9:e58542. doi: 10.7554/eLife.58542 (PMC7591249; doi:10.7554/eLife.58542)
Supplement: Figure 2—source data 2. [file elife-58542-fig2-data2.csv]

scaled IPD Ratio	Activity	Isolate	Lineage	MTase
0.163405391051308	knocked down	1-0006	East-Asian	MamA
0.443825852498491	knocked down	1-0006	East-Asian	MamA
0.426218371815081	knocked down	1-0006	East-Asian	MamA
-0.0556697259012945	knocked down	1-0006	East-Asian	MamA
2.83661196174222	wild-type	1-0006	East-Asian	MamB
2.75256852392974	wild-type	1-0006	East-Asian	HsdM
2.4086735580444	wild-type	1-0006	East-Asian	HsdM
3.11305209857413	wild-type	1-0006	East-Asian	MamB
0.732337781953516	knocked down	1-0006	East-Asian	MamA
1.40783274498075	knocked down	1-0006	East-Asian	MamA
2.86649956263838	wild-type	1-0006	East-Asian	HsdM
2.3677513569703	wild-type	1-0006	East-Asian	HsdM
2.90534408576715	wild-type	1-0006	East-Asian	HsdM
2.64560237349398	wild-type	1-0006	East-Asian	HsdM
0.641793275463684	knocked down	1-0006	East-Asian	MamA
0.624526772332414	knocked down	1-0006	East-Asian	MamA
1.02842371400606	knocked down	1-0006	East-Asian	MamA
0.686851825224855	knocked down	1-0006	East-Asian	MamA
2.1874481202871	wild-type	1-0006	East-Asian	MamB
0.333625573065676	knocked down	1-0006	East-Asian	MamA
0.298975330942175	knocked down	1-0006	East-Asian	MamA
2.5009246272215	wild-type	1-0006	East-Asian	HsdM
2.8457469155318	wild-type	1-0006	East-Asian	HsdM
3.01044254343062	wild-type	1-0006	East-Asian	HsdM
3.17019767513422	wild-type	1-0006	East-Asian	HsdM
0.31819553249607	knocked down	1-0006	East-Asian	MamA
0.467690525151421	knocked down	1-0006	East-Asian	MamA
0.521540499095675	knocked down	1-0006	East-Asian	MamA
0.100964816275401	knocked down	1-0006	East-Asian	MamA
2.91740698895551	wild-type	1-0006	East-Asian	MamB
3.05820082732141	wild-type	1-0006	East-Asian	MamB
1.88070942183301	knocked down	1-0006	East-Asian	MamA
1.33421575308654	knocked down	1-0006	East-Asian	MamA
0.412870288554137	knocked down	1-0006	East-Asian	MamA
0.103736565525455	knocked down	1-0006	East-Asian	MamA
2.26068093275767	wild-type	1-0006	East-Asian	MamB
0.417333385820863	knocked down	1-0006	East-Asian	MamA
2.44764901024833	knocked down	1-0006	East-Asian	MamA
0.817533684923086	knocked down	1-0006	East-Asian	MamA
1.44437263857321	knocked down	1-0006	East-Asian	MamA
0.97341476655489	knocked down	1-0006	East-Asian	MamA
0.963530651196708	knocked down	1-0006	East-Asian	MamA
2.71816382192877	wild-type	1-0006	East-Asian	MamB
2.6065626443809	wild-type	1-0006	East-Asian	HsdM
2.43229521229498	wild-type	1-0006	East-Asian	HsdM
2.44382585249849	wild-type	1-0006	East-Asian	MamB
1.08351968181599	knocked down	1-0006	East-Asian	MamA
0.546202553329944	knocked down	1-0006	East-Asian	MamA
0.365154764854904	knocked down	1-0006	East-Asian	MamA
0.121624286841494	knocked down	1-0006	East-Asian	MamA
3.28209795560834	wild-type	1-0006	East-Asian	MamB
2.43834656356928	wild-type	1-0006	East-Asian	MamB
1.17991615767022	knocked down	1-0006	East-Asian	MamA
1.75499489029171	knocked down	1-0006	East-Asian	MamA
0.313414434364271	knocked down	1-0006	East-Asian	MamA
0.766847312380125	knocked down	1-0006	East-Asian	MamA
-0.0821992086561093	knocked down	1-0006	East-Asian	MamA
0.0443812879090337	knocked down	1-0006	East-Asian	MamA
2.64488893325482	wild-type	1-0006	East-Asian	MamB
1.57095094840682	knocked down	1-0006	East-Asian	MamA
1.2941300029926	knocked down	1-0006	East-Asian	MamA
0.99447638208272	knocked down	1-0006	East-Asian	MamA
0.433948099671759	knocked down	1-0006	East-Asian	MamA
0.665436791208773	knocked down	1-0006	East-Asian	MamA
0.5225765458482	knocked down	1-0006	East-Asian	MamA
0.642746493232678	knocked down	1-0006	East-Asian	MamA
0.486926744014338	knocked down	1-0006	East-Asian	MamA
2.69537555724709	wild-type	1-0006	East-Asian	MamB
0.0630154620480847	knocked down	1-0006	East-Asian	MamA
0.171354144166799	knocked down	1-0006	East-Asian	MamA
3.13269252379769	wild-type	1-0006	East-Asian	MamB
1.01964460958753	knocked down	1-0006	East-Asian	MamA
0.984735999442327	knocked down	1-0006	East-Asian	MamA
2.66965177728373	wild-type	1-0006	East-Asian	MamB
0.82511132438541	knocked down	1-0006	East-Asian	MamA
0.00637496532928879	knocked down	1-0006	East-Asian	MamA
-0.323350496591453	knocked down	1-0006	East-Asian	MamA
-0.143325867217695	knocked down	1-0006	East-Asian	MamA
0.183195756811316	knocked down	1-0006	East-Asian	MamA
0.442731658254998	knocked down	1-0006	East-Asian	MamA
2.75345131119357	wild-type	1-0006	East-Asian	HsdM
2.5246464099635	wild-type	1-0006	East-Asian	HsdM
0.485864767491679	knocked down	1-0006	East-Asian	MamA
0.0729504401058046	knocked down	1-0006	East-Asian	MamA
1.15741495320893	knocked down	1-0006	East-Asian	MamA
0.655081350043798	knocked down	1-0006	East-Asian	MamA
0.997460240521541	knocked down	1-0006	East-Asian	MamA
1.32474377788281	knocked down	1-0006	East-Asian	MamA
0.562412780511203	knocked down	1-0006	East-Asian	MamA
0.892378194463984	knocked down	1-0006	East-Asian	MamA
0.358207584299432	knocked down	1-0006	East-Asian	MamA
0.0342469107753205	knocked down	1-0006	East-Asian	MamA
-0.0175211510168731	knocked down	1-0006	East-Asian	MamA
-0.39784104069604	knocked down	1-0006	East-Asian	MamA
0.230881845553528	knocked down	1-0006	East-Asian	MamA
0.202718315076134	knocked down	1-0006	East-Asian	MamA
0.355884403377303	knocked down	1-0006	East-Asian	MamA
0.137941464071372	knocked down	1-0006	East-Asian	MamA
2.65342701858458	wild-type	1-0006	East-Asian	HsdM
2.13658872600612	wild-type	1-0006	East-Asian	HsdM
0.780769688612494	knocked down	1-0006	East-Asian	MamA
0.562412780511203	knocked down	1-0006	East-Asian	MamA
0.75895652676066	knocked down	1-0006	East-Asian	MamA
0.726954585256612	knocked down	1-0006	East-Asian	MamA
3.06550562794464	wild-type	1-0006	East-Asian	MamB
3.55875607653144	wild-type	1-0006	East-Asian	MamB
2.44873948274234	wild-type	1-0006	East-Asian	HsdM
2.57395239548293	wild-type	1-0006	East-Asian	HsdM
3.10304412728759	wild-type	1-0006	East-Asian	MamB
0.350060031151321	knocked down	1-0006	East-Asian	MamA
0.38237775142405	knocked down	1-0006	East-Asian	MamA
2.54620255332994	wild-type	1-0006	East-Asian	MamB
0.258506093261881	knocked down	1-0006	East-Asian	MamA
-0.0759129458086781	knocked down	1-0006	East-Asian	MamA
2.21013247192329	wild-type	1-0006	East-Asian	HsdM
2.56316818416275	wild-type	1-0006	East-Asian	HsdM
-0.120503096832749	knocked down	1-0006	East-Asian	MamA
0.223255246078829	knocked down	1-0006	East-Asian	MamA
0.856674132782305	knocked down	1-0006	East-Asian	MamA
1.0573074623533	knocked down	1-0006	East-Asian	MamA
0.313414434364271	knocked down	1-0006	East-Asian	MamA
0.151399537791154	knocked down	1-0006	East-Asian	MamA
1.09470884146746	knocked down	1-0006	East-Asian	MamA
1.0159708234391	knocked down	1-0006	East-Asian	MamA
0.543142753580886	knocked down	1-0006	East-Asian	MamA
0.749253252365387	knocked down	1-0006	East-Asian	MamA
1.11064273017776	knocked down	1-0006	East-Asian	MamA
0.601178534501777	knocked down	1-0006	East-Asian	MamA
0.0443812879090337	knocked down	1-0006	East-Asian	MamA
1.0218443991485	knocked down	1-0006	East-Asian	MamA
0.365154764854904	knocked down	1-0006	East-Asian	MamA
0.262232384720165	knocked down	1-0006	East-Asian	MamA
1.05945060962668	knocked down	1-0006	East-Asian	MamA
0.718841939469293	knocked down	1-0006	East-Asian	MamA
-0.0948545094621383	knocked down	1-0006	East-Asian	MamA
0.544163408056345	knocked down	1-0006	East-Asian	MamA
2.95319419564858	wild-type	1-0006	East-Asian	HsdM
2.28591642970475	wild-type	1-0006	East-Asian	HsdM
3.17448846656787	wild-type	1-0006	East-Asian	MamB
2.85708486446932	wild-type	1-0006	East-Asian	HsdM
2.7195197384204	wild-type	1-0006	East-Asian	HsdM
0.701563948037457	knocked down	1-0006	East-Asian	MamA
2.73144197624893	knocked down	1-0006	East-Asian	MamA
0.494338771537037	knocked down	1-0006	East-Asian	MamA
0.905939707481062	knocked down	1-0006	East-Asian	MamA
0.644651041418038	knocked down	1-0006	East-Asian	MamA
1.18319575681132	knocked down	1-0006	East-Asian	MamA
2.56367156694556	wild-type	1-0006	East-Asian	HsdM
2.5111389036352	wild-type	1-0006	East-Asian	HsdM
2.13760339844806	wild-type	1-0006	East-Asian	MamB
3.06728169001911	wild-type	1-0006	East-Asian	MamB
1.74570854532197	knocked down	1-0006	East-Asian	MamA
1.47037760926011	knocked down	1-0006	East-Asian	MamA
0.109264139493888	knocked down	1-0006	East-Asian	MamA
0.462301295720999	knocked down	1-0006	East-Asian	MamA
0.813306623472785	knocked down	1-0006	East-Asian	MamA
1.32414970950263	knocked down	1-0006	East-Asian	MamA
3.34465147154532	wild-type	1-0006	East-Asian	MamB
3.10009755142158	wild-type	1-0006	East-Asian	MamB
-0.0341823812846684	knocked down	1-0006	East-Asian	MamA
0.585400441042593	knocked down	1-0006	East-Asian	MamA
2.42178271869483	wild-type	1-0006	East-Asian	HsdM
2.38237775142405	wild-type	1-0006	East-Asian	HsdM
2.77990346520557	wild-type	1-0006	East-Asian	HsdM
3.00229588654202	wild-type	1-0006	East-Asian	HsdM
0.512182444397441	knocked down	1-0006	East-Asian	MamA
0.771212504941527	knocked down	1-0006	East-Asian	MamA
0.915436362995663	knocked down	1-0006	East-Asian	MamA
0.514267264183497	knocked down	1-0006	East-Asian	MamA
3.27934238274854	wild-type	1-0006	East-Asian	MamB
2.65342701858458	wild-type	1-0006	East-Asian	HsdM
2.38807335708805	wild-type	1-0006	East-Asian	HsdM
1.23214903495506	knocked down	1-0006	East-Asian	MamA
0.825950832725008	knocked down	1-0006	East-Asian	MamA
1.25289854771458	knocked down	1-0006	East-Asian	MamA
1.41454556844924	knocked down	1-0006	East-Asian	MamA
3.6968677828272	wild-type	1-0006	East-Asian	MamB
0.410633551608598	knocked down	1-0006	East-Asian	MamA
0.228344122751629	knocked down	1-0006	East-Asian	MamA
0.295342861442253	knocked down	1-0006	East-Asian	MamA
0.281945006226709	knocked down	1-0006	East-Asian	MamA
0.415103563057201	knocked down	1-0006	East-Asian	MamA
0.301391906115058	knocked down	1-0006	East-Asian	MamA
0.88111336836817	knocked down	1-0006	East-Asian	MamA
1.0587365808861	knocked down	1-0006	East-Asian	MamA
0.77469517420281	knocked down	1-0006	East-Asian	MamA
1.00192448866614	knocked down	1-0006	East-Asian	MamA
3.06958730677777	wild-type	1-0006	East-Asian	MamB
2.92055440234649	wild-type	1-0006	East-Asian	HsdM
3.16207633057879	wild-type	1-0006	East-Asian	HsdM
1.17728709992054	knocked down	1-0006	East-Asian	MamA
0.511138903635205	knocked down	1-0006	East-Asian	MamA
3.22150179075555	wild-type	1-0006	East-Asian	MamB
1.25414655388314	knocked down	1-0006	East-Asian	MamA
0.260991356651475	knocked down	1-0006	East-Asian	MamA
0.232149034955059	knocked down	1-0006	East-Asian	MamA
0.781635392233363	knocked down	1-0006	East-Asian	MamA
1.84014823569143	knocked down	1-0006	East-Asian	MamA
1.59232459919938	knocked down	1-0006	East-Asian	MamA
1.45091795811421	knocked down	1-0006	East-Asian	MamA
1.36803957893528	knocked down	1-0006	East-Asian	MamA
0.908319738333005	knocked down	1-0006	East-Asian	MamA
0.648452611577895	knocked down	1-0006	East-Asian	MamA
0.957414287861175	knocked down	1-0006	East-Asian	MamA
1.19624010463604	knocked down	1-0006	East-Asian	MamA
0.435048973468701	knocked down	1-0006	East-Asian	MamA
0.29048529779295	knocked down	1-0006	East-Asian	MamA
0.566437037069998	knocked down	1-0006	East-Asian	MamA
0.650349646750492	knocked down	1-0006	East-Asian	MamA
2.88091140923844	wild-type	1-0006	East-Asian	MamB
3.08685053034299	wild-type	1-0006	East-Asian	MamB
3.24852200468926	wild-type	1-0006	East-Asian	HsdM
2.75433355860885	wild-type	1-0006	East-Asian	HsdM
1.10027104610532	knocked down	1-0006	East-Asian	MamA
1.06159057794126	knocked down	1-0006	East-Asian	MamA
0.662619943504488	knocked down	1-0006	East-Asian	MamA
1.28926834703257	knocked down	1-0006	East-Asian	MamA
2.50302576728471	wild-type	1-0006	East-Asian	MamB
-0.243683355112045	knocked down	1-0006	East-Asian	MamA
0.275813696356999	knocked down	1-0006	East-Asian	MamA
1.25601654123618	knocked down	1-0006	East-Asian	MamA
0.9381317896296	knocked down	1-0006	East-Asian	MamA
1.6065626443809	knocked down	1-0006	East-Asian	MamA
1.56944787998724	knocked down	1-0006	East-Asian	MamA
2.33716303713688	wild-type	1-0006	East-Asian	HsdM
2.6463154610977	wild-type	1-0006	East-Asian	HsdM
1.32533760174009	knocked down	1-0006	East-Asian	MamA
1.0863251178792	knocked down	1-0006	East-Asian	MamA
0.135234718360147	knocked down	1-0006	East-Asian	MamA
0.621628823502185	knocked down	1-0006	East-Asian	MamA
2.58911394384166	wild-type	1-0006	East-Asian	HsdM
2.48214168144896	wild-type	1-0006	East-Asian	HsdM
0.578442890330152	knocked down	1-0006	East-Asian	MamA
1.15206915722341	knocked down	1-0006	East-Asian	MamA
2.67455374719011	wild-type	1-0006	East-Asian	MamB
1.72515571340149	knocked down	1-0006	East-Asian	MamA
1.54773002307654	knocked down	1-0006	East-Asian	MamA
0.988490087016989	knocked down	1-0006	East-Asian	MamA
0.780769688612494	knocked down	1-0006	East-Asian	MamA
0.80225794765693	knocked down	1-0006	East-Asian	MamA
1.0159708234391	knocked down	1-0006	East-Asian	MamA
3.3318535830281	wild-type	1-0006	East-Asian	MamB
2.510094607505	wild-type	1-0006	East-Asian	MamB
0.39713981294967	knocked down	1-0006	East-Asian	MamA
1.30681444554038	knocked down	1-0006	East-Asian	MamA
2.97549698766682	wild-type	1-0006	East-Asian	MamB
-0.135133369104587	knocked down	1-0006	East-Asian	MamA
0.765097530430165	knocked down	1-0006	East-Asian	MamA
2.86179989331134	wild-type	1-0006	East-Asian	MamB
0.698816828754433	knocked down	1-0006	East-Asian	MamA
0.776433361209323	knocked down	1-0006	East-Asian	MamA
3.03678718694068	wild-type	1-0006	East-Asian	MamB
2.769031559642	wild-type	1-0006	East-Asian	MamB
0.181884811658969	knocked down	1-0006	East-Asian	MamA
0.132522884778051	knocked down	1-0006	East-Asian	MamA
0.181884811658969	knocked down	1-0006	East-Asian	MamA
0.402777549865688	knocked down	1-0006	East-Asian	MamA
3.20594654430607	wild-type	1-0006	East-Asian	MamB
1.37149375865612	knocked down	1-0006	East-Asian	MamA
1.95932843838861	knocked down	1-0006	East-Asian	MamA
0.954346354667002	knocked down	1-0006	East-Asian	MamA
0.756316644887955	knocked down	1-0006	East-Asian	MamA
2.61678593529937	wild-type	1-0006	East-Asian	MamB
2.30500919603573	wild-type	1-0006	East-Asian	HsdM
2.33037526028281	wild-type	1-0006	East-Asian	HsdM
0.808217746799985	knocked down	1-0006	East-Asian	MamA
1.45689185915884	knocked down	1-0006	East-Asian	MamA
0.675718432036515	knocked down	1-0006	East-Asian	MamA
0.347723682396365	knocked down	1-0006	East-Asian	MamA
0.584408557166541	knocked down	1-0006	East-Asian	MamA
0.110642730177755	knocked down	1-0006	East-Asian	MamA
1.59084364607613	knocked down	1-0006	East-Asian	MamA
0.820063989648094	knocked down	1-0006	East-Asian	MamA
1.25164946102106	knocked down	1-0006	East-Asian	MamA
0.695145847025936	knocked down	1-0006	East-Asian	MamA
3.36269812924402	wild-type	1-0006	East-Asian	MamB
2.21302332346787	knocked down	1-0006	East-Asian	MamA
1.57295260677979	knocked down	1-0006	East-Asian	MamA
1.20659132422334	knocked down	1-0006	East-Asian	MamA
0.914647358305016	knocked down	1-0006	East-Asian	MamA
2.79605923359661	wild-type	1-0006	East-Asian	MamB
0.893980299060485	knocked down	1-0006	East-Asian	MamA
0.590349657014326	knocked down	1-0006	East-Asian	MamA
1.15005936580357	knocked down	1-0006	East-Asian	MamA
1.01891060039292	knocked down	1-0006	East-Asian	MamA
0.604117812342016	knocked down	1-0006	East-Asian	MamA
0.935800474755112	knocked down	1-0006	East-Asian	MamA
1.01376205285064	knocked down	1-0006	East-Asian	MamA
1.99932202299813	knocked down	1-0006	East-Asian	MamA
2.9183912934495	wild-type	1-0006	East-Asian	MamB
3.17909509166383	wild-type	1-0006	East-Asian	MamB
1.46013995443153	knocked down	1-0006	East-Asian	MamA
1.50643360670547	knocked down	1-0006	East-Asian	MamA
3.29154928828381	wild-type	1-0006	East-Asian	MamB
0.497503734504846	knocked down	1-0006	East-Asian	MamA
0.168709422911235	knocked down	1-0006	East-Asian	MamA
0.420671671246085	knocked down	1-0006	East-Asian	MamA
1.36803957893528	knocked down	1-0006	East-Asian	MamA
2.62814104154853	wild-type	1-0006	East-Asian	MamB
2.93793765721447	wild-type	1-0006	East-Asian	MamB
3.29139733767638	wild-type	1-0006	East-Asian	MamB
2.96162207168712	wild-type	1-0006	East-Asian	MamB
1.11888672427266	knocked down	1-0006	East-Asian	MamA
0.435048973468701	knocked down	1-0006	East-Asian	MamA
3.35180981310128	wild-type	1-0006	East-Asian	MamB
1.11683013797873	knocked down	1-0006	East-Asian	MamA
0.583415990879788	knocked down	1-0006	East-Asian	MamA
0.846781328023873	knocked down	1-0006	East-Asian	MamA
1.5032881947599	knocked down	1-0006	East-Asian	MamA
3.00359502669364	wild-type	1-0006	East-Asian	MamB
0.455807533635499	knocked down	1-0006	East-Asian	MamA
0.374365937667454	knocked down	1-0006	East-Asian	MamA
0.637017716515611	knocked down	1-0006	East-Asian	MamA
0.79112400368677	knocked down	1-0006	East-Asian	MamA
0.960475710847392	knocked down	1-0006	East-Asian	MamA
1.1120200047844	knocked down	1-0006	East-Asian	MamA
3.04257679106229	wild-type	1-0006	East-Asian	HsdM
3.11751599253925	wild-type	1-0006	East-Asian	HsdM
0.830141062336045	knocked down	1-0006	East-Asian	MamA
0.7554356097211	knocked down	1-0006	East-Asian	MamA
1.30621294666117	knocked down	1-0006	East-Asian	MamA
1.20788002019191	knocked down	1-0006	East-Asian	MamA
1.02769415897615	knocked down	1-0006	East-Asian	MamA
1.30139190611506	knocked down	1-0006	East-Asian	MamA
2.60215895930396	wild-type	1-0006	East-Asian	MamB
0.470914426025707	knocked down	1-0006	East-Asian	MamA
0.301391906115058	knocked down	1-0006	East-Asian	MamA
0.232149034955059	knocked down	1-0006	East-Asian	MamA
0.486926744014338	knocked down	1-0006	East-Asian	MamA
0.743044287794918	knocked down	1-0006	East-Asian	MamA
0.484802008665801	knocked down	1-0006	East-Asian	MamA
2.91602783346827	wild-type	1-0006	East-Asian	HsdM
2.82469138695241	wild-type	1-0006	East-Asian	HsdM
2.40530736159391	wild-type	1-0006	East-Asian	MamB
3.41482459273034	wild-type	1-0006	East-Asian	MamB
0.750138069958831	knocked down	1-0006	East-Asian	MamA
0.166059844497286	knocked down	1-0006	East-Asian	MamA
0.487987939384649	knocked down	1-0006	East-Asian	MamA
0.724255435655657	knocked down	1-0006	East-Asian	MamA
2.63869096088944	wild-type	1-0006	East-Asian	MamB
3.33907554805088	wild-type	1-0006	East-Asian	MamB
3.26780383784397	wild-type	1-0006	East-Asian	MamB
1.32711760818538	knocked down	1-0006	East-Asian	MamA
0.548238820486463	knocked down	1-0006	East-Asian	MamA
0.678509845434074	knocked down	1-0006	East-Asian	MamA
0.389209784906475	knocked down	1-0006	East-Asian	MamA
0.814153027158482	knocked down	1-0006	East-Asian	MamA
1.61775581435498	knocked down	1-0006	East-Asian	MamA
1.61775581435498	knocked down	1-0006	East-Asian	MamA
1.40727193057489	knocked down	1-0006	East-Asian	MamA
0.562412780511203	knocked down	1-0006	East-Asian	MamA
0.717937711899178	knocked down	1-0006	East-Asian	MamA
0.634144774894011	knocked down	1-0006	East-Asian	MamA
1.26842156212696	knocked down	1-0006	East-Asian	MamA
0.623561436036184	knocked down	1-0006	East-Asian	MamA
0.36052703020239	knocked down	1-0006	East-Asian	MamA
2.97246730803204	wild-type	1-0006	East-Asian	HsdM
3.18728479940156	wild-type	1-0006	East-Asian	HsdM
2.50512385169868	wild-type	1-0006	East-Asian	MamB
0.809916034272011	knocked down	1-0006	East-Asian	MamA
1.05444497125373	knocked down	1-0006	East-Asian	MamA
0.422892911162764	knocked down	1-0006	East-Asian	MamA
0.568444963686244	knocked down	1-0006	East-Asian	MamA
0.795416464576896	knocked down	1-0006	East-Asian	MamA
0.940459343306098	knocked down	1-0006	East-Asian	MamA
2.57245245248777	wild-type	1-0006	East-Asian	MamB
0.628381671194806	knocked down	1-0006	East-Asian	MamA
1.20336453906942	knocked down	1-0006	East-Asian	MamA
2.28713620998531	wild-type	1-0006	East-Asian	MamB
1.0954052909335	knocked down	1-0006	East-Asian	MamA
1.64892710427774	knocked down	1-0006	East-Asian	MamA
3.12418604254429	wild-type	1-0006	East-Asian	MamB
1.05945060962668	knocked down	1-0006	East-Asian	MamA
0.0658610153194851	knocked down	1-0006	East-Asian	MamA
3.04293787103936	wild-type	1-0006	East-Asian	MamB
0.640839427468019	knocked down	1-0006	East-Asian	MamA
1.15273846599945	knocked down	1-0006	East-Asian	MamA
0.345383543941848	knocked down	1-0006	East-Asian	MamA
1.10788423021519	knocked down	1-0006	East-Asian	MamA
0.765097530430165	knocked down	1-0006	East-Asian	MamA
1.07436415412475	knocked down	1-0006	East-Asian	MamA
0.275813696356999	knocked down	1-0006	East-Asian	MamA
1.04004669764514	knocked down	1-0006	East-Asian	MamA
0.238468340025336	knocked down	1-0006	East-Asian	MamA
1.29716023943722	knocked down	1-0006	East-Asian	MamA
3.23909875080263	wild-type	1-0006	East-Asian	HsdM
3.12980594416171	wild-type	1-0006	East-Asian	HsdM
3.38280570269259	wild-type	1-0006	East-Asian	MamB
0.800550616048332	knocked down	1-0006	East-Asian	MamA
0.113395965824214	knocked down	1-0006	East-Asian	MamA
-0.131869351782694	knocked down	1-0006	East-Asian	MamA
0.646553078662413	knocked down	1-0006	East-Asian	MamA
-0.295694153688588	knocked down	1-0006	East-Asian	MamA
1.03787450896745	knocked down	1-0006	East-Asian	MamA
0.00785541188391967	knocked down	1-0006	East-Asian	MamA
0.273353857669194	knocked down	1-0006	East-Asian	MamA
2.68777574138893	wild-type	1-0006	East-Asian	HsdM
2.25039929192993	wild-type	1-0006	East-Asian	HsdM
0.930346044663004	knocked down	1-0006	East-Asian	MamA
-0.248977654781558	knocked down	1-0006	East-Asian	MamA
2.08807574913501	knocked down	1-0006	East-Asian	MamA
1.8887669409116	knocked down	1-0006	East-Asian	MamA
0.451462063359535	knocked down	1-0006	East-Asian	MamA
0.286831361586735	knocked down	1-0006	East-Asian	MamA
1.73233778195352	wild-type	1-0006	East-Asian	HsdM
1.50695717595124	wild-type	1-0006	East-Asian	HsdM
0.113395965824214	knocked down	1-0006	East-Asian	MamA
0.698816828754433	knocked down	1-0006	East-Asian	MamA
2.48240793503298	wild-type	1-0006	East-Asian	HsdM
1.77903672138804	wild-type	1-0006	East-Asian	HsdM
-0.505661228462963	knocked down	1-0006	East-Asian	MamA
0.634144774894011	knocked down	1-0006	East-Asian	MamA
1.07577648418457	knocked down	1-0006	East-Asian	MamA
0.943556918389547	knocked down	1-0006	East-Asian	MamA
2.32504072036423	wild-type	1-0006	East-Asian	MamB
1.13320132120762	knocked down	1-0006	East-Asian	MamA
1.17003238957055	knocked down	1-0006	East-Asian	MamA
1.77034052241822	knocked down	1-0006	East-Asian	MamA
1.05157678931324	knocked down	1-0006	East-Asian	MamA
0.618725041829047	knocked down	1-0006	East-Asian	MamA
0.952041115762323	knocked down	1-0006	East-Asian	MamA
2.93093143523338	wild-type	1-0006	East-Asian	MamB
2.80927941072374	wild-type	1-0006	East-Asian	HsdM
2.17794481365014	wild-type	1-0006	East-Asian	HsdM
0.64750315774903	knocked down	1-0006	East-Asian	MamA
0.989988991090406	knocked down	1-0006	East-Asian	MamA
1.09679718206017	knocked down	1-0006	East-Asian	MamA
1.05157678931324	knocked down	1-0006	East-Asian	MamA
2.98360786563724	wild-type	1-0006	East-Asian	MamB
0.548238820486463	knocked down	1-0006	East-Asian	MamA
0.708864128273716	knocked down	1-0006	East-Asian	MamA
0.455807533635499	knocked down	1-0006	East-Asian	MamA
0.751906078808642	knocked down	1-0006	East-Asian	MamA
3.91326556093781	wild-type	1-0006	East-Asian	MamB
0.7554356097211	knocked down	1-0006	East-Asian	MamA
2.23625973045539	knocked down	1-0006	East-Asian	MamA
1.14468619370472	knocked down	1-0006	East-Asian	MamA
1.88796321106302	knocked down	1-0006	East-Asian	MamA
3.36947982567652	wild-type	1-0006	East-Asian	MamB
0.252274139550367	knocked down	1-0006	East-Asian	MamA
0.39713981294967	knocked down	1-0006	East-Asian	MamA
2.6104657784245	wild-type	1-0006	East-Asian	MamB
-0.179936010351906	knocked down	1-0006	East-Asian	MamA
0.490107991259018	knocked down	1-0006	East-Asian	MamA
-0.0115099129830114	knocked down	1-0006	East-Asian	MamA
0.246015149078684	knocked down	1-0006	East-Asian	MamA
0.224529149067462	knocked down	1-0006	East-Asian	MamA
-0.301183171245567	knocked down	1-0006	East-Asian	MamA
1.04942190460956	knocked down	1-0006	East-Asian	MamA
0.328895421153279	knocked down	1-0006	East-Asian	MamA
0.460139954431532	knocked down	1-0006	East-Asian	MamA
0.125720915360972	knocked down	1-0006	East-Asian	MamA
3.47787492775591	wild-type	1-0006	East-Asian	MamB
1.29048529779295	knocked down	1-0006	East-Asian	MamA
0.541099275844211	knocked down	1-0006	East-Asian	MamA
0.577446209778671	knocked down	1-0006	East-Asian	MamA
0.393746565503247	knocked down	1-0006	East-Asian	MamA
2.59109057719198	wild-type	1-0006	East-Asian	HsdM
2.63486354682994	wild-type	1-0006	East-Asian	HsdM
1.11751599253925	knocked down	1-0006	East-Asian	MamA
1.66073898490572	knocked down	1-0006	East-Asian	MamA
0.0211115085861865	knocked down	1-0006	East-Asian	MamA
0.279495608285391	knocked down	1-0006	East-Asian	MamA
0.660738984905724	knocked down	1-0006	East-Asian	MamA
0.305009196035732	knocked down	1-0006	East-Asian	MamA
0.487987939384649	knocked down	1-0006	East-Asian	MamA
0.966579136305401	knocked down	1-0006	East-Asian	MamA
0.811612324932909	knocked down	1-0006	East-Asian	MamA
0.163405391051308	knocked down	1-0006	East-Asian	MamA
0.783365242609545	knocked down	1-0006	East-Asian	MamA
0.369767702568807	knocked down	1-0006	East-Asian	MamA
1.14199208453546	knocked down	1-0006	East-Asian	MamA
0.312216680006649	knocked down	1-0006	East-Asian	MamA
0.630305264867635	knocked down	1-0006	East-Asian	MamA
0.828466430643791	knocked down	1-0006	East-Asian	MamA
0.143339767997202	knocked down	1-0006	East-Asian	MamA
0.353557475387548	knocked down	1-0006	East-Asian	MamA
1.17794481365014	knocked down	1-0006	East-Asian	MamA
1.29170122288885	knocked down	1-0006	East-Asian	MamA
1.9794638112277	wild-type	1-0006	East-Asian	HsdM
3.16854396674489	wild-type	1-0006	East-Asian	HsdM
0.280720827077407	knocked down	1-0006	East-Asian	MamA
0.767721408160205	knocked down	1-0006	East-Asian	MamA
2.88252629122139	wild-type	1-0006	East-Asian	MamB
2.95990218866099	wild-type	1-0006	East-Asian	MamB
3.38066467577347	wild-type	1-0006	East-Asian	HsdM
2.45336481733977	wild-type	1-0006	East-Asian	HsdM
0.216868803419168	knocked down	1-0006	East-Asian	MamA
0.86159521216736	knocked down	1-0006	East-Asian	MamA
0.597250158920337	knocked down	1-0006	East-Asian	MamA
1.23088184555353	knocked down	1-0006	East-Asian	MamA
0.649401440971443	knocked down	1-0006	East-Asian	MamA
0.268421562126964	knocked down	1-0006	East-Asian	MamA
2.73725479537303	wild-type	1-0006	East-Asian	HsdM
2.66637451957516	wild-type	1-0006	East-Asian	HsdM
0.351226788223316	knocked down	1-0006	East-Asian	MamA
0.389209784906475	knocked down	1-0006	East-Asian	MamA
0.562412780511203	knocked down	1-0006	East-Asian	MamA
0.890774308761394	knocked down	1-0006	East-Asian	MamA
1.50381290654633	knocked down	1-0006	East-Asian	MamA
0.139292934934501	knocked down	1-0006	East-Asian	MamA
-0.0916802616669947	knocked down	1-0006	East-Asian	MamA
0.140643140967437	knocked down	1-0006	East-Asian	MamA
3.28148606076685	wild-type	1-0006	East-Asian	MamB
0.646553078662413	knocked down	1-0006	East-Asian	MamA
0.267185848954295	knocked down	1-0006	East-Asian	MamA
1.80694271795792	knocked down	1-0006	East-Asian	MamA
0.866499562638378	knocked down	1-0006	East-Asian	MamA
2.27088981771771	wild-type	1-0006	East-Asian	HsdM
2.63797409377363	wild-type	1-0006	East-Asian	HsdM
1.04438128790903	knocked down	1-0006	East-Asian	MamA
1.81711153567621	knocked down	1-0006	East-Asian	MamA
1.00043794032144	knocked down	1-0006	East-Asian	MamA
0.168709422911235	knocked down	1-0006	East-Asian	MamA
1.42898374555979	knocked down	1-0006	East-Asian	MamA
-0.261407104323076	knocked down	1-0006	East-Asian	MamA
0.917013079044284	knocked down	1-0006	East-Asian	MamA
0.253522685747625	knocked down	1-0006	East-Asian	MamA
0.180572674196178	knocked down	1-0006	East-Asian	MamA
0.140643140967437	knocked down	1-0006	East-Asian	MamA
0.399397552128584	knocked down	1-0006	East-Asian	MamA
-0.0418197471402702	knocked down	1-0006	East-Asian	MamA
2.32504072036423	wild-type	1-0006	East-Asian	MamB
0.185814078838329	knocked down	1-0006	East-Asian	MamA
0.463380753340299	knocked down	1-0006	East-Asian	MamA
0.0630154620480847	knocked down	1-0006	East-Asian	MamA
0.144686193704719	knocked down	1-0006	East-Asian	MamA
0.435048973468701	knocked down	1-0006	East-Asian	MamA
0.412870288554137	knocked down	1-0006	East-Asian	MamA
2.8782833645782	wild-type	1-0006	East-Asian	MamB
3.39643354425152	wild-type	1-0006	East-Asian	MamB
0.505909847381911	knocked down	1-0006	East-Asian	MamA
0.780769688612494	knocked down	1-0006	East-Asian	MamA
0.692386467719527	knocked down	1-0006	East-Asian	MamA
0.693306847362155	knocked down	1-0006	East-Asian	MamA
2.6080275573931	wild-type	1-0006	East-Asian	MamB
1.15474453126945	knocked down	1-0006	East-Asian	MamA
1.02842371400606	knocked down	1-0006	East-Asian	MamA
-0.0853526416949836	knocked down	1-0006	East-Asian	MamA
0.596266391380758	knocked down	1-0006	East-Asian	MamA
1.49539453085301	knocked down	1-0006	East-Asian	MamA
1.44382585249849	knocked down	1-0006	East-Asian	MamA
0.428431094704193	knocked down	1-0006	East-Asian	MamA
1.20465611931763	knocked down	1-0006	East-Asian	MamA
0.681295868264912	knocked down	1-0006	East-Asian	MamA
0.303804440190449	knocked down	1-0006	East-Asian	MamA
0.28316814749615	knocked down	1-0006	East-Asian	MamA
0.791983518183977	knocked down	1-0006	East-Asian	MamA
2.43669871068779	wild-type	1-0006	East-Asian	MamB
1.3359848459396	knocked down	1-0006	East-Asian	MamA
0.517388855825208	knocked down	1-0006	East-Asian	MamA
0.956647915975483	knocked down	1-0006	East-Asian	MamA
1.39544418684942	knocked down	1-0006	East-Asian	MamA
2.90931026019882	wild-type	1-0006	East-Asian	MamB
2.79133893032268	wild-type	1-0006	East-Asian	MamB
0.136588726006123	knocked down	1-0006	East-Asian	MamA
0.483738466383291	knocked down	1-0006	East-Asian	MamA
3.06923283624997	wild-type	1-0006	East-Asian	MamB
2.36052703020239	wild-type	1-0006	East-Asian	MamB
1.50957217583502	knocked down	1-0006	East-Asian	MamA
1.57395239548293	knocked down	1-0006	East-Asian	MamA
0.712500412595466	knocked down	1-0006	East-Asian	MamA
0.583415990879788	knocked down	1-0006	East-Asian	MamA
0.843468593983037	knocked down	1-0006	East-Asian	MamA
0.269656217778603	knocked down	1-0006	East-Asian	MamA
3.37063098874649	wild-type	1-0006	East-Asian	MamB
0.213023323467873	knocked down	1-0006	East-Asian	MamA
0.467690525151421	knocked down	1-0006	East-Asian	MamA
0.272122363748162	knocked down	1-0006	East-Asian	MamA
0.274584301275455	knocked down	1-0006	East-Asian	MamA
0.958945811402973	knocked down	1-0006	East-Asian	MamA
2.03461008133505	knocked down	1-0006	East-Asian	MamA
0.633185854924584	knocked down	1-0006	East-Asian	MamA
-0.0806250731579989	knocked down	1-0006	East-Asian	MamA
0.596266391380758	knocked down	1-0006	East-Asian	MamA
0.260991356651475	knocked down	1-0006	East-Asian	MamA
2.4882531163068	wild-type	1-0006	East-Asian	MamB
1.77860315412981	wild-type	1-0006	East-Asian	HsdM
2.63653929003439	wild-type	1-0006	East-Asian	HsdM
0.609003340346014	knocked down	1-0006	East-Asian	MamA
0.328895421153279	knocked down	1-0006	East-Asian	MamA
2.31909022712375	wild-type	1-0006	East-Asian	HsdM
1.92878384089272	wild-type	1-0006	East-Asian	HsdM
3.15724819657222	wild-type	1-0006	East-Asian	MamB
0.921732914358296	knocked down	1-0006	East-Asian	MamA
0.292916124047712	knocked down	1-0006	East-Asian	MamA
0.319388335408904	knocked down	1-0006	East-Asian	MamA
0.200130520586979	knocked down	1-0006	East-Asian	MamA
2.5905966726884	wild-type	1-0006	East-Asian	HsdM
3.07824473977532	wild-type	1-0006	East-Asian	HsdM
2.57993662130834	wild-type	1-0006	East-Asian	MamB
-0.240164584975249	knocked down	1-0006	East-Asian	MamA
0.431743828745029	knocked down	1-0006	East-Asian	MamA
0.102351356546364	knocked down	1-0006	East-Asian	MamA
0.380093198229496	knocked down	1-0006	East-Asian	MamA
2.69881682875443	wild-type	1-0006	East-Asian	HsdM
2.80268446504093	wild-type	1-0006	East-Asian	HsdM
3.28683136158674	wild-type	1-0006	East-Asian	HsdM
2.1450226038825	wild-type	1-0006	East-Asian	HsdM
0.340691848617126	knocked down	1-0006	East-Asian	MamA
-0.0160159917349226	knocked down	1-0006	East-Asian	MamA
0.95818025285973	knocked down	1-0006	East-Asian	MamA
1.79969619195413	knocked down	1-0006	East-Asian	MamA
3.02951735527704	wild-type	1-0006	East-Asian	MamB
1.03206596547579	knocked down	1-0006	East-Asian	MamA
0.948961722830351	knocked down	1-0006	East-Asian	MamA
1.17860222766967	knocked down	1-0006	East-Asian	MamA
-0.109225691238606	knocked down	1-0006	East-Asian	MamA
3.34479791574591	wild-type	1-0006	East-Asian	MamB
1.1534074644074	knocked down	1-0006	East-Asian	MamA
0.162076330578788	knocked down	1-0006	East-Asian	MamA
2.66402905483991	wild-type	1-0006	East-Asian	MamB
0.763345623668572	knocked down	1-0006	East-Asian	MamA
1.29837055413982	knocked down	1-0006	East-Asian	MamA
2.41287028855414	wild-type	1-0006	East-Asian	HsdM
2.05694996141209	wild-type	1-0006	East-Asian	HsdM
2.72245319302167	wild-type	1-0006	East-Asian	MamB
2.69537555724709	wild-type	1-0006	East-Asian	MamB
-0.495138242050955	knocked down	1-0006	East-Asian	MamA
-0.256067079567877	knocked down	1-0006	East-Asian	MamA
0.889168637988094	knocked down	1-0006	East-Asian	MamA
1.11545744991999	knocked down	1-0006	East-Asian	MamA
0.512182444397441	knocked down	1-0006	East-Asian	MamA
0.974172285627631	knocked down	1-0006	East-Asian	MamA
2.93229642354717	wild-type	1-0006	East-Asian	HsdM
2.46957200940248	wild-type	1-0006	East-Asian	HsdM
2.82111697490825	wild-type	1-0006	East-Asian	MamB
2.50407519089227	wild-type	1-0006	East-Asian	MamB
1.49381060201223	knocked down	1-0006	East-Asian	MamA
1.88916863798809	knocked down	1-0006	East-Asian	MamA
1.31819553249607	knocked down	1-0006	East-Asian	MamA
1.63462399597162	knocked down	1-0006	East-Asian	MamA
-0.0948545094621383	knocked down	1-0006	East-Asian	MamA
1.04654370905965	knocked down	1-0006	East-Asian	MamA
0.869759891801965	knocked down	1-0006	East-Asian	MamA
0.632226297163311	knocked down	1-0006	East-Asian	MamA
1.2616120041297	knocked down	1-0006	East-Asian	MamA
1.55382378098921	knocked down	1-0006	East-Asian	MamA
3.02330906429043	wild-type	1-0006	East-Asian	MamB
2.81203608614638	wild-type	1-0006	East-Asian	MamB
2.99690123694688	wild-type	1-0006	East-Asian	MamB
3.15223651353018	wild-type	1-0006	East-Asian	HsdM
2.70224991129987	wild-type	1-0006	East-Asian	HsdM
2.78055318151508	wild-type	1-0006	East-Asian	MamB
3.16953641923132	wild-type	1-0006	East-Asian	MamB
2.66097423888764	wild-type	1-0006	East-Asian	MamB
3.08964950304757	wild-type	1-0006	East-Asian	MamB
-0.013010375979303	knocked down	1-0006	East-Asian	MamA
0.291701222888853	knocked down	1-0006	East-Asian	MamA
-0.117271975569736	knocked down	1-0006	East-Asian	MamA
0.653190530584558	knocked down	1-0006	East-Asian	MamA
0.837652942407116	knocked down	1-0006	East-Asian	MamA
0.0544449712537312	knocked down	1-0006	East-Asian	MamA
0.820063989648094	knocked down	1-0006	East-Asian	MamA
0.931126512651143	knocked down	1-0006	East-Asian	MamA
0.770340522418221	knocked down	1-0006	East-Asian	MamA
0.0785970032469467	knocked down	1-0006	East-Asian	MamA
2.29716023943722	wild-type	1-0006	East-Asian	MamB
2.68315023232598	wild-type	1-0006	East-Asian	HsdM
2.14938881267001	wild-type	1-0006	East-Asian	HsdM
2.88111336836817	wild-type	1-0006	East-Asian	MamB
0.070118849322642	knocked down	1-0006	East-Asian	MamA
0.0167063294661854	knocked down	1-0006	East-Asian	MamA
0.783365242609545	knocked down	1-0006	East-Asian	MamA
-0.659308151382874	knocked down	1-0006	East-Asian	MamA
0.76246887186955	knocked down	1-0006	East-Asian	MamA
0.61387237986775	knocked down	1-0006	East-Asian	MamA
0.962003989635316	knocked down	1-0006	East-Asian	MamA
1.18122889210191	knocked down	1-0006	East-Asian	MamA
0.590349657014326	knocked down	1-0006	East-Asian	MamA
-0.173210147163593	knocked down	1-0006	East-Asian	MamA
0.610952928535794	knocked down	1-0006	East-Asian	MamA
0.93968390924234	knocked down	1-0006	East-Asian	MamA
2.02111150858619	knocked down	1-0006	East-Asian	MamA
1.14535893563385	knocked down	1-0006	East-Asian	MamA
1.19038473904796	knocked down	1-0006	East-Asian	MamA
1.23024783322037	knocked down	1-0006	East-Asian	MamA
0.517388855825208	knocked down	1-0006	East-Asian	MamA
0.521540499095675	knocked down	1-0006	East-Asian	MamA
1.42511073641258	knocked down	1-0006	East-Asian	MamA
1.22261787251384	knocked down	1-0006	East-Asian	MamA
0.247269121379177	knocked down	1-0006	East-Asian	MamA
0.400525098134309	knocked down	1-0006	East-Asian	MamA
0.529808115079275	knocked down	1-0006	East-Asian	MamA
0.484802008665801	knocked down	1-0006	East-Asian	MamA
0.731441976248926	knocked down	1-0006	East-Asian	MamA
0.120256154884161	knocked down	1-0006	East-Asian	MamA
2.35064352763688	wild-type	1-0006	East-Asian	HsdM
2.53495141835523	wild-type	1-0006	East-Asian	HsdM
1.01964460958753	knocked down	1-0006	East-Asian	MamA
0.794558993502091	knocked down	1-0006	East-Asian	MamA
2.75565591895889	wild-type	1-0006	East-Asian	MamB
3.01615473510241	wild-type	1-0006	East-Asian	MamB
2.75058027533881	wild-type	1-0006	East-Asian	MamB
2.57220231030407	wild-type	1-0006	East-Asian	MamB
1.3558844033773	knocked down	1-0006	East-Asian	MamA
1.68222334823314	knocked down	1-0006	East-Asian	MamA
2.74348867253303	wild-type	1-0006	East-Asian	MamB
3.23309869711171	wild-type	1-0006	East-Asian	MamB
2.082466235226	wild-type	1-0006	East-Asian	HsdM
2.36428819457704	wild-type	1-0006	East-Asian	HsdM
2.59897013958667	wild-type	1-0006	East-Asian	MamB
1.9903634739065	knocked down	1-0006	East-Asian	MamA
1.06728169001911	knocked down	1-0006	East-Asian	MamA
0.565432024809997	knocked down	1-0006	East-Asian	MamA
0.156747810981597	knocked down	1-0006	East-Asian	MamA
0.500661769419759	knocked down	1-0006	East-Asian	MamA
1.21109673287546	knocked down	1-0006	East-Asian	MamA
0.722453193021671	knocked down	1-0006	East-Asian	MamA
0.869759891801965	knocked down	1-0006	East-Asian	MamA
1.14670347910572	knocked down	1-0006	East-Asian	MamA
0.732337781953516	knocked down	1-0006	East-Asian	MamA
1.43339734759754	knocked down	1-0006	East-Asian	MamA
0.760713768197021	knocked down	1-0006	East-Asian	MamA
3.12469784827575	wild-type	1-0006	East-Asian	MamB
1.26656759523115	knocked down	1-0006	East-Asian	MamA
-0.0326597478547943	knocked down	1-0006	East-Asian	MamA
2.70339245910718	wild-type	1-0006	East-Asian	MamB
3.54569303715269	wild-type	1-0006	East-Asian	MamB
1.36226417073845	knocked down	1-0006	East-Asian	MamA
1.02111150858619	knocked down	1-0006	East-Asian	MamA
1.19948284603474	knocked down	1-0006	East-Asian	MamA
0.938908058166428	knocked down	1-0006	East-Asian	MamA
0.453636434593872	knocked down	1-0006	East-Asian	MamA
1.03569904480923	knocked down	1-0006	East-Asian	MamA
0.654136250081477	knocked down	1-0006	East-Asian	MamA
0.654136250081477	knocked down	1-0006	East-Asian	MamA
-0.0175211510168731	knocked down	1-0006	East-Asian	MamA
0.181884811658969	knocked down	1-0006	East-Asian	MamA
1.10304412728759	knocked down	1-0006	East-Asian	MamA
0.192339169296135	knocked down	1-0006	East-Asian	MamA
3.11236411809334	wild-type	1-0006	East-Asian	MamB
2.6967530510254	wild-type	1-0006	East-Asian	HsdM
2.43862102281882	wild-type	1-0006	East-Asian	HsdM
0.0814120188540007	knocked down	1-0006	East-Asian	MamA
0.491166850052156	knocked down	1-0006	East-Asian	MamA
2.85173620996664	wild-type	1-0006	East-Asian	MamB
3.61605809787996	wild-type	1-0006	East-Asian	MamB
1.10788423021519	knocked down	1-0006	East-Asian	MamA
1.83348450541042	knocked down	1-0006	East-Asian	MamA
0.339516536909852	knocked down	1-0006	East-Asian	MamA
-0.156531406016963	knocked down	1-0006	East-Asian	MamA
2.37894956357517	wild-type	1-0006	East-Asian	HsdM
2.62428549880716	wild-type	1-0006	East-Asian	HsdM
2.7115922003899	wild-type	1-0006	East-Asian	MamB
3.46849717602001	wild-type	1-0006	East-Asian	MamB
1.31281568148542	knocked down	1-0006	East-Asian	MamA
0.758077102752393	knocked down	1-0006	East-Asian	MamA
1.66026836182509	knocked down	1-0006	East-Asian	MamA
1.58093158344494	knocked down	1-0006	East-Asian	MamA
3.16572830478748	wild-type	1-0006	East-Asian	MamB
2.55736662272271	wild-type	1-0006	East-Asian	MamB
2.84926089616371	wild-type	1-0006	East-Asian	MamB
2.53828475948649	wild-type	1-0006	East-Asian	MamB
2.59281791260508	wild-type	1-0006	East-Asian	MamB
0.729648694425875	knocked down	1-0006	East-Asian	MamA
1.29837055413982	knocked down	1-0006	East-Asian	MamA
0.464459403888408	knocked down	1-0006	East-Asian	MamA
0.785956135327829	knocked down	1-0006	East-Asian	MamA
0.412870288554137	knocked down	1-0006	East-Asian	MamA
0.256016541236183	knocked down	1-0006	East-Asian	MamA
0.547221046164965	knocked down	1-0006	East-Asian	MamA
0.64560237349398	knocked down	1-0006	East-Asian	MamA
3.21173921564755	wild-type	1-0006	East-Asian	MamB
2.62307852555774	wild-type	1-0006	East-Asian	MamB
2.7401524457147	wild-type	1-0006	East-Asian	HsdM
2.64679065709702	wild-type	1-0006	East-Asian	HsdM
2.07824473977532	wild-type	1-0006	East-Asian	MamB
2.55660817442299	wild-type	1-0006	East-Asian	MamB
0.197538075970454	knocked down	1-0006	East-Asian	MamA
0.411752353557563	knocked down	1-0006	East-Asian	MamA
0.247269121379177	knocked down	1-0006	East-Asian	MamA
0.75895652676066	knocked down	1-0006	East-Asian	MamA
2.78012006982138	wild-type	1-0006	East-Asian	MamB
0.937355103182367	knocked down	1-0006	East-Asian	MamA
1.19559068079393	knocked down	1-0006	East-Asian	MamA
2.64679065709702	wild-type	1-0006	East-Asian	MamB
1.36342110347157	knocked down	1-0006	East-Asian	MamA
1.38408879535763	knocked down	1-0006	East-Asian	MamA
1.04293787103936	knocked down	1-0006	East-Asian	MamA
0.45254965861714	knocked down	1-0006	East-Asian	MamA
-0.59497350963075	knocked down	1-0006	East-Asian	MamA
0.0196446095875273	knocked down	1-0006	East-Asian	MamA
0.444919217492763	knocked down	1-0006	East-Asian	MamA
1.32058015294128	knocked down	1-0006	East-Asian	MamA
0.0240408396248582	knocked down	1-0006	East-Asian	MamA
0.540076450533102	knocked down	1-0006	East-Asian	MamA
0.0327933136338219	knocked down	1-0006	East-Asian	MamA
1.18712146002512	knocked down	1-0006	East-Asian	MamA
1.42511073641258	knocked down	1-0006	East-Asian	MamA
1.35472140852118	knocked down	1-0006	East-Asian	MamA
0.751906078808642	knocked down	1-0006	East-Asian	MamA
0.998949858662028	knocked down	1-0006	East-Asian	MamA
0.393746565503247	knocked down	1-0006	East-Asian	MamA
0.461221029821863	knocked down	1-0006	East-Asian	MamA
0.490107991259018	knocked down	1-0006	East-Asian	MamA
0.473059697857264	knocked down	1-0006	East-Asian	MamA
1.1567478109816	knocked down	1-0006	East-Asian	MamA
0.419559767498646	knocked down	1-0006	East-Asian	MamA
0.114770615800432	knocked down	1-0006	East-Asian	MamA
0.671988126038684	knocked down	1-0006	East-Asian	MamA
3.30305095657752	wild-type	1-0006	East-Asian	MamB
0.9982052418502	knocked down	1-0006	East-Asian	MamA
0.567441349704283	knocked down	1-0006	East-Asian	MamA
2.5987245535718	wild-type	1-0006	East-Asian	HsdM
2.74748198751319	wild-type	1-0006	East-Asian	HsdM
3.31356408376442	wild-type	1-0006	East-Asian	MamB
1.08562427014092	knocked down	1-0006	East-Asian	MamA
1.08702562531753	knocked down	1-0006	East-Asian	MamA
0.484802008665801	knocked down	1-0006	East-Asian	MamA
0.259749260112513	knocked down	1-0006	East-Asian	MamA
0.542121376518127	knocked down	1-0006	East-Asian	MamA
1.28194500622671	knocked down	1-0006	East-Asian	MamA
0.259749260112513	knocked down	1-0006	East-Asian	MamA
1.3217709867199	knocked down	1-0006	East-Asian	MamA
2.68106390507752	wild-type	1-0006	East-Asian	HsdM
3.0073004224403	wild-type	1-0006	East-Asian	HsdM
3.00489299802806	wild-type	1-0006	East-Asian	MamB
0.141992084535456	knocked down	1-0006	East-Asian	MamA
0.375513210126236	knocked down	1-0006	East-Asian	MamA
0.88836513195736	knocked down	1-0006	East-Asian	MamA
1.02550327770334	knocked down	1-0006	East-Asian	MamA
2.20304146325553	wild-type	1-0006	East-Asian	HsdM
2.51478799872836	wild-type	1-0006	East-Asian	HsdM
0.396009617011816	knocked down	1-0006	East-Asian	MamA
0.00489299802805817	knocked down	1-0006	East-Asian	MamA
2.59207787922599	wild-type	1-0006	East-Asian	MamB
0.487987939384649	knocked down	1-0006	East-Asian	MamA
0.390345318251905	knocked down	1-0006	East-Asian	MamA
0.267185848954295	knocked down	1-0006	East-Asian	MamA
-0.0341823812846684	knocked down	1-0006	East-Asian	MamA
2.4906375177986	wild-type	1-0006	East-Asian	MamB
0.900370985217514	knocked down	1-0006	East-Asian	MamA
0.817533684923086	knocked down	1-0006	East-Asian	MamA
0.688699066246611	knocked down	1-0006	East-Asian	MamA
0.77469517420281	knocked down	1-0006	East-Asian	MamA
1.49275368252109	knocked down	1-0006	East-Asian	MamA
1.00711537850484	knocked down	1-0006	East-Asian	MamA
1.14468619370472	knocked down	1-0006	East-Asian	MamA
0.93968390924234	knocked down	1-0006	East-Asian	MamA
2.97398294314545	wild-type	1-0006	East-Asian	MamB
2.17925934225215	wild-type	1-0006	East-Asian	MamB
-0.0326597478547943	knocked down	1-0006	East-Asian	MamA
0.286831361586735	knocked down	1-0006	East-Asian	MamA
-0.433562962930002	knocked down	1-0006	East-Asian	MamA
-0.168186247574098	knocked down	1-0006	East-Asian	MamA
0.566437037069998	knocked down	1-0006	East-Asian	MamA
0.128445552697508	knocked down	1-0006	East-Asian	MamA
2.9289792088991	wild-type	1-0006	East-Asian	MamB
2.72897563864465	wild-type	1-0006	East-Asian	MamB
2.34743137259071	wild-type	1-0006	East-Asian	HsdM
2.28957268097334	wild-type	1-0006	East-Asian	HsdM
2.6965235600457	wild-type	1-0006	East-Asian	HsdM
2.92506681317016	wild-type	1-0006	East-Asian	HsdM
0.962767522355382	knocked down	1-0006	East-Asian	MamA
0.428431094704193	knocked down	1-0006	East-Asian	MamA
0.150059365803571	knocked down	1-0006	East-Asian	MamA
0.198834880588906	knocked down	1-0006	East-Asian	MamA
0.257261854253419	knocked down	1-0006	East-Asian	MamA
0.118886724272663	knocked down	1-0006	East-Asian	MamA
-0.128612702451989	knocked down	1-0006	East-Asian	MamA
0.117515992539249	knocked down	1-0006	East-Asian	MamA
0.596266391380758	knocked down	1-0006	East-Asian	MamA
0.951271883517552	knocked down	1-0006	East-Asian	MamA
2.32117569269829	wild-type	1-0006	East-Asian	MamB
0.368615850179565	knocked down	1-0006	East-Asian	MamA
0.375513210126236	knocked down	1-0006	East-Asian	MamA
0.345383543941848	knocked down	1-0006	East-Asian	MamA
0.278269348083311	knocked down	1-0006	East-Asian	MamA
0.429536184793378	knocked down	1-0006	East-Asian	MamA
0.311017930423023	knocked down	1-0006	East-Asian	MamA
1.27273824211008	knocked down	1-0006	East-Asian	MamA
1.32711760818538	knocked down	1-0006	East-Asian	MamA
2.60166883018734	wild-type	1-0006	East-Asian	MamB
2.14737528123236	wild-type	1-0006	East-Asian	HsdM
2.49960985902617	wild-type	1-0006	East-Asian	HsdM
0.600197442970673	knocked down	1-0006	East-Asian	MamA
0.1311650540511	knocked down	1-0006	East-Asian	MamA
1.1845055118181	knocked down	1-0006	East-Asian	MamA
0.800550616048332	knocked down	1-0006	East-Asian	MamA
0.324149709502629	knocked down	1-0006	East-Asian	MamA
0.170032389570554	knocked down	1-0006	East-Asian	MamA
1.73636203851231	knocked down	1-0006	East-Asian	MamA
1.08492308177188	knocked down	1-0006	East-Asian	MamA
1.35355747538755	knocked down	1-0006	East-Asian	MamA
0.152738465999452	knocked down	1-0006	East-Asian	MamA
1.24538775396513	knocked down	1-0006	East-Asian	MamA
1.45472239252312	knocked down	1-0006	East-Asian	MamA
2.99447638208272	wild-type	1-0006	East-Asian	MamB
0.944330274098706	knocked down	1-0006	East-Asian	MamA
1.72290396479253	knocked down	1-0006	East-Asian	MamA
2.7803366419213	wild-type	1-0006	East-Asian	HsdM
3.02458942764372	wild-type	1-0006	East-Asian	HsdM
3.10633025299978	wild-type	1-0006	East-Asian	MamB
2.88010328988338	wild-type	1-0006	East-Asian	HsdM
2.7419327267253	wild-type	1-0006	East-Asian	HsdM
0.259749260112513	knocked down	1-0006	East-Asian	MamA
-0.301183171245567	knocked down	1-0006	East-Asian	MamA
3.32518916868878	wild-type	1-0006	East-Asian	MamB
2.84905442817897	wild-type	1-0006	East-Asian	MamB
0.200130520586979	knocked down	1-0006	East-Asian	MamA
0.278269348083311	knocked down	1-0006	East-Asian	MamA
0.164733228274256	knocked down	1-0006	East-Asian	MamA
0.214306289351346	knocked down	1-0006	East-Asian	MamA
3.03787450896745	wild-type	1-0006	East-Asian	MamB
0.455807533635499	knocked down	1-0006	East-Asian	MamA
0.442731658254998	knocked down	1-0006	East-Asian	MamA
3.2724303357935	wild-type	1-0006	East-Asian	MamB
0.662619943504488	knocked down	1-0006	East-Asian	MamA
0.796273426313343	knocked down	1-0006	East-Asian	MamA
1.27396921064969	knocked down	1-0006	East-Asian	MamA
0.856674132782305	knocked down	1-0006	East-Asian	MamA
3.75289963245911	wild-type	1-0006	East-Asian	MamB
1.24161764282774	knocked down	1-0006	East-Asian	MamA
0.589361171164838	knocked down	1-0006	East-Asian	MamA
2.70499050742094	wild-type	1-0006	East-Asian	MamB
0.710683416082129	knocked down	1-0006	East-Asian	MamA
0.770340522418221	knocked down	1-0006	East-Asian	MamA
0.854207284006485	knocked down	1-0006	East-Asian	MamA
1.06586101531949	knocked down	1-0006	East-Asian	MamA
1.19429095544396	knocked down	1-0006	East-Asian	MamA
1.57545078063499	knocked down	1-0006	East-Asian	MamA
0.317001742572026	knocked down	1-0006	East-Asian	MamA
1.04149300858421	knocked down	1-0006	East-Asian	MamA
2.61338621472721	wild-type	1-0006	East-Asian	MamB
0.956647915975483	knocked down	1-0006	East-Asian	MamA
0.727853180764261	knocked down	1-0006	East-Asian	MamA
0.426218371815081	knocked down	1-0006	East-Asian	MamA
0.409513881361564	knocked down	1-0006	East-Asian	MamA
0.273353857669194	knocked down	1-0006	East-Asian	MamA
1.06087760780523	knocked down	1-0006	East-Asian	MamA
0.905145490537862	knocked down	1-0006	East-Asian	MamA
1.19299005811425	knocked down	1-0006	East-Asian	MamA
3.17942357414268	wild-type	1-0006	East-Asian	HsdM
2.76968618948348	wild-type	1-0006	East-Asian	HsdM
2.415940150521	wild-type	1-0006	East-Asian	MamB
2.87037038410569	wild-type	1-0006	East-Asian	MamB
2.05301159305247	knocked down	1-0006	East-Asian	MamA
1.78293297442927	knocked down	1-0006	East-Asian	MamA
0.0573074623533038	knocked down	1-0006	East-Asian	MamA
-0.163179782026328	knocked down	1-0006	East-Asian	MamA
-0.0603160907576595	knocked down	1-0006	East-Asian	MamA
0.559387204342763	knocked down	1-0006	East-Asian	MamA
1.19299005811425	knocked down	1-0006	East-Asian	MamA
0.735915452828234	knocked down	1-0006	East-Asian	MamA
0.649401440971443	knocked down	1-0006	East-Asian	MamA
1.21173921564755	knocked down	1-0006	East-Asian	MamA
1.16074604460082	knocked down	1-0006	East-Asian	MamA
1.50171291339405	knocked down	1-0006	East-Asian	MamA
1.24350392992263	knocked down	1-0006	East-Asian	MamA
1.47413113870925	knocked down	1-0006	East-Asian	MamA
1.14199208453546	knocked down	1-0006	East-Asian	MamA
-0.203726573686657	knocked down	1-0006	East-Asian	MamA
1.37894956357517	knocked down	1-0006	East-Asian	MamA
1.40502649036925	knocked down	1-0006	East-Asian	MamA
3.24098833200385	wild-type	1-0006	East-Asian	MamB
0.676649503408547	knocked down	1-0006	East-Asian	MamA
0.254770152354437	knocked down	1-0006	East-Asian	MamA
1.02111150858619	knocked down	1-0006	East-Asian	MamA
0.52671330865641	knocked down	1-0006	East-Asian	MamA
1.30621294666117	knocked down	1-0006	East-Asian	MamA
0.760713768197021	knocked down	1-0006	East-Asian	MamA
0.420671671246085	knocked down	1-0006	East-Asian	MamA
0.601178534501777	knocked down	1-0006	East-Asian	MamA
-0.141683641609649	knocked down	1-0006	East-Asian	MamA
0.779903465205571	knocked down	1-0006	East-Asian	MamA
0.386936033386354	knocked down	1-0006	East-Asian	MamA
0.29048529779295	knocked down	1-0006	East-Asian	MamA
0.426218371815081	knocked down	1-0006	East-Asian	MamA
0.987740050586844	knocked down	1-0006	East-Asian	MamA
2.58391235938318	wild-type	1-0006	East-Asian	HsdM
2.6572055639847	wild-type	1-0006	East-Asian	HsdM
2.66332467121087	wild-type	1-0006	East-Asian	HsdM
2.75763718964001	wild-type	1-0006	East-Asian	HsdM
2.76400283803309	wild-type	1-0006	East-Asian	MamB
2.59084364607613	wild-type	1-0006	East-Asian	MamB
0.672921607171794	knocked down	1-0006	East-Asian	MamA
1.2207040605495	knocked down	1-0006	East-Asian	MamA
2.38835754797657	wild-type	1-0006	East-Asian	HsdM
2.63486354682994	wild-type	1-0006	East-Asian	HsdM
0.00340950685272754	knocked down	1-0006	East-Asian	MamA
0.223255246078829	knocked down	1-0006	East-Asian	MamA
0.503812906546331	knocked down	1-0006	East-Asian	MamA
0.545183340966191	knocked down	1-0006	East-Asian	MamA
2.84180937006135	wild-type	1-0006	East-Asian	MamB
2.03352029527727	wild-type	1-0006	East-Asian	HsdM
2.48240793503298	wild-type	1-0006	East-Asian	HsdM
1.4906375177986	knocked down	1-0006	East-Asian	MamA
1.11614395720912	knocked down	1-0006	East-Asian	MamA
1.08842562061505	knocked down	1-0006	East-Asian	MamA
-0.181622386979793	knocked down	1-0006	East-Asian	MamA
1.08422155244082	knocked down	1-0006	East-Asian	MamA
0.718841939469293	knocked down	1-0006	East-Asian	MamA
2.66871617735412	wild-type	1-0006	East-Asian	MamB
1.43284638519219	knocked down	1-0006	East-Asian	MamA
1.3318535830281	knocked down	1-0006	East-Asian	MamA
1.09610140435636	knocked down	1-0006	East-Asian	MamA
0.964293376586342	knocked down	1-0006	East-Asian	MamA
2.60827156501159	wild-type	1-0006	East-Asian	HsdM
2.8628228636732	wild-type	1-0006	East-Asian	HsdM
3.3677513569703	wild-type	1-0006	East-Asian	MamB
1.54058795383252	knocked down	1-0006	East-Asian	MamA
0.628381671194806	knocked down	1-0006	East-Asian	MamA
3.09383780657963	wild-type	1-0006	East-Asian	MamB
2.57545078063499	wild-type	1-0006	East-Asian	MamB
2.60851553136727	wild-type	1-0006	East-Asian	HsdM
2.60068807213401	wild-type	1-0006	East-Asian	HsdM
-0.057216852098773	knocked down	1-0006	East-Asian	MamA
0.530838243677765	knocked down	1-0006	East-Asian	MamA
2.26068093275767	wild-type	1-0006	East-Asian	HsdM
2.96009338805706	wild-type	1-0006	East-Asian	HsdM
3.26130171376591	wild-type	1-0006	East-Asian	MamB
2.72357985847596	wild-type	1-0006	East-Asian	HsdM
2.49301798499336	wild-type	1-0006	East-Asian	HsdM
2.75873672101012	wild-type	1-0006	East-Asian	MamB
0.671988126038684	knocked down	1-0006	East-Asian	MamA
0.300184124511752	knocked down	1-0006	East-Asian	MamA
2.96104900512908	wild-type	1-0006	East-Asian	HsdM
2.55862981783089	wild-type	1-0006	East-Asian	HsdM
2.8457469155318	wild-type	1-0006	East-Asian	MamB
2.93112651265114	wild-type	1-0006	East-Asian	MamB
0.366309382796396	knocked down	1-0006	East-Asian	MamA
0.489048354750941	knocked down	1-0006	East-Asian	MamA
3.31819553249607	wild-type	1-0006	East-Asian	MamB
1.16141134091922	knocked down	1-0006	East-Asian	MamA
1.23720669146142	knocked down	1-0006	East-Asian	MamA
2.40052509813431	wild-type	1-0006	East-Asian	MamB
0.901964243293182	knocked down	1-0006	East-Asian	MamA
1.61532989308236	knocked down	1-0006	East-Asian	MamA
0.692386467719527	knocked down	1-0006	East-Asian	MamA
0.816689262867437	knocked down	1-0006	East-Asian	MamA
0.880305362163409	knocked down	1-0006	East-Asian	MamA
1.1534074644074	knocked down	1-0006	East-Asian	MamA
1.15808178707376	knocked down	1-0006	East-Asian	MamA
0.695145847025936	knocked down	1-0006	East-Asian	MamA
0.420671671246085	knocked down	1-0006	East-Asian	MamA
0.780769688612494	knocked down	1-0006	East-Asian	MamA
1.23151557938357	knocked down	1-0006	East-Asian	MamA
0.767721408160205	knocked down	1-0006	East-Asian	MamA
2.76049423003318	wild-type	1-0006	East-Asian	MamB
0.651297229734239	knocked down	1-0006	East-Asian	MamA
1.02769415897615	knocked down	1-0006	East-Asian	MamA
3.02696423483162	wild-type	1-0006	East-Asian	MamB
-0.00851366052309176	knocked down	1-0006	East-Asian	MamA
1.22580192818918	knocked down	1-0006	East-Asian	MamA
0.00192448866613889	knocked down	1-0006	East-Asian	MamA
0.224529149067462	knocked down	1-0006	East-Asian	MamA
0.499609859026173	knocked down	1-0006	East-Asian	MamA
0.480543127223484	knocked down	1-0006	East-Asian	MamA
0.898775965662134	knocked down	1-0006	East-Asian	MamA
0.545183340966191	knocked down	1-0006	East-Asian	MamA
0.264711242788589	knocked down	1-0006	East-Asian	MamA
0.632226297163311	knocked down	1-0006	East-Asian	MamA
0.64750315774903	knocked down	1-0006	East-Asian	MamA
1.40783274498075	knocked down	1-0006	East-Asian	MamA
1.03424691077532	knocked down	1-0006	East-Asian	MamA
1.1534074644074	knocked down	1-0006	East-Asian	MamA
0.584408557166541	knocked down	1-0006	East-Asian	MamA
0.302598677445052	knocked down	1-0006	East-Asian	MamA
1.72155122672728	knocked down	1-0006	East-Asian	MamA
0.518427887228339	knocked down	1-0006	East-Asian	MamA
0.736808485998741	knocked down	1-0006	East-Asian	MamA
-0.00701786459761061	knocked down	1-0006	East-Asian	MamA
2.51218244439744	wild-type	1-0006	East-Asian	MamB
1.23468007953563	knocked down	1-0006	East-Asian	MamA
0.971139819895499	knocked down	1-0006	East-Asian	MamA
2.7622496006417	wild-type	1-0006	East-Asian	HsdM
2.75300998508401	wild-type	1-0006	East-Asian	HsdM
0.60215895930396	knocked down	1-0006	East-Asian	MamA
0.0981877316048275	knocked down	1-0006	East-Asian	MamA
2.77860315412981	wild-type	1-0006	East-Asian	HsdM
2.7915538249445	wild-type	1-0006	East-Asian	HsdM
3.14232912344387	wild-type	1-0006	East-Asian	MamB
-0.403733608619242	knocked down	1-0006	East-Asian	MamA
0.431743828745029	knocked down	1-0006	East-Asian	MamA
0.269656217778603	knocked down	1-0006	East-Asian	MamA
0.0211115085861865	knocked down	1-0006	East-Asian	MamA
1.36688634542792	knocked down	1-0006	East-Asian	MamA
0.191036510028499	knocked down	1-0006	East-Asian	MamA
2.02915290029446	wild-type	1-0006	East-Asian	HsdM
2.55230275286636	wild-type	1-0006	East-Asian	HsdM
2.41231142934092	wild-type	1-0006	East-Asian	MamB
2.510094607505	wild-type	1-0006	East-Asian	HsdM
2.4259415426785	wild-type	1-0006	East-Asian	HsdM
0.154076152734964	knocked down	1-0006	East-Asian	MamA
0.207880020191913	knocked down	1-0006	East-Asian	MamA
3.93346538650718	wild-type	1-0006	East-Asian	MamB
0.243503929922634	knocked down	1-0006	East-Asian	MamA
-0.143325867217695	knocked down	1-0006	East-Asian	MamA
0.21814835564574	knocked down	1-0006	East-Asian	MamA
0.429536184793378	knocked down	1-0006	East-Asian	MamA
3.44491921749276	wild-type	1-0006	East-Asian	MamB
0.100964816275401	knocked down	1-0006	East-Asian	MamA
0.347723682396365	knocked down	1-0006	East-Asian	MamA
2.66073898490572	wild-type	1-0006	East-Asian	HsdM
2.49724025262284	wild-type	1-0006	East-Asian	HsdM
2.10235135654636	wild-type	1-0006	East-Asian	HsdM
2.68175968278133	wild-type	1-0006	East-Asian	HsdM
0.72875121692204	knocked down	1-0006	East-Asian	MamA
0.193640653408657	knocked down	1-0006	East-Asian	MamA
2.95127188351755	wild-type	1-0006	East-Asian	MamB
0.565432024809997	knocked down	1-0006	East-Asian	MamA
0.576448840198064	knocked down	1-0006	East-Asian	MamA
3.31071808732917	wild-type	1-0006	East-Asian	MamB
2.78076968861249	wild-type	1-0006	East-Asian	MamB
0.198834880588906	knocked down	1-0006	East-Asian	MamA
0.407271930574894	knocked down	1-0006	East-Asian	MamA
0.582422741242697	knocked down	1-0006	East-Asian	MamA
1.35530302313938	knocked down	1-0006	East-Asian	MamA
0.744821006050126	knocked down	1-0006	East-Asian	MamA
0.863231848804467	knocked down	1-0006	East-Asian	MamA
2.86445810900655	wild-type	1-0006	East-Asian	MamB
3.2337314581047	wild-type	1-0006	East-Asian	MamB
1.8566741327823	knocked down	1-0006	East-Asian	MamA
1.6896218005543	knocked down	1-0006	East-Asian	MamA
-0.013010375979303	knocked down	1-0006	East-Asian	MamA
0.583415990879788	knocked down	1-0006	East-Asian	MamA
0.137941464071372	knocked down	1-0006	East-Asian	MamA
0.162076330578788	knocked down	1-0006	East-Asian	MamA
1.00637496532929	knocked down	1-0006	East-Asian	MamA
0.575450780634988	knocked down	1-0006	East-Asian	MamA
0.891576474498429	knocked down	1-0006	East-Asian	MamA
0.524646409963497	knocked down	1-0006	East-Asian	MamA
0.183195756811316	knocked down	1-0006	East-Asian	MamA
0.518427887228339	knocked down	1-0006	East-Asian	MamA
1.33244448823435	knocked down	1-0006	East-Asian	MamA
0.0967971820601723	knocked down	1-0006	East-Asian	MamA
0.321770986719898	knocked down	1-0006	East-Asian	MamA
0.763345623668572	knocked down	1-0006	East-Asian	MamA
0.78250057669161	knocked down	1-0006	East-Asian	MamA
0.417333385820863	knocked down	1-0006	East-Asian	MamA
2.44519242931838	wild-type	1-0006	East-Asian	HsdM
2.919374926842	wild-type	1-0006	East-Asian	HsdM
1.12025615488416	knocked down	1-0006	East-Asian	MamA
1.15741495320893	knocked down	1-0006	East-Asian	MamA
2.86261832762112	wild-type	1-0006	East-Asian	HsdM
2.42261544312827	wild-type	1-0006	East-Asian	HsdM
3.03569904480923	wild-type	1-0006	East-Asian	MamB
3.02275998910173	wild-type	1-0006	East-Asian	MamB
0.717032917237419	knocked down	1-0006	East-Asian	MamA
0.275813696356999	knocked down	1-0006	East-Asian	MamA
1.06515015300361	knocked down	1-0006	East-Asian	MamA
0.209167566052373	knocked down	1-0006	East-Asian	MamA
2.39119638210958	wild-type	1-0006	East-Asian	HsdM
2.28744099398156	wild-type	1-0006	East-Asian	HsdM
2.79413006677353	wild-type	1-0006	East-Asian	MamB
0.662619943504488	knocked down	1-0006	East-Asian	MamA
-0.215770609391639	knocked down	1-0006	East-Asian	MamA
1.1739940260395	knocked down	1-0006	East-Asian	MamA
0.116143957209125	knocked down	1-0006	East-Asian	MamA
0.285611323424479	knocked down	1-0006	East-Asian	MamA
0.267185848954295	knocked down	1-0006	East-Asian	MamA
2.5142672641835	wild-type	1-0006	East-Asian	HsdM
2.64536459927986	wild-type	1-0006	East-Asian	HsdM
0.393746565503247	knocked down	1-0006	East-Asian	MamA
0.296554701111061	knocked down	1-0006	East-Asian	MamA
2.8031108563669	wild-type	1-0006	East-Asian	MamB
0.88111336836817	knocked down	1-0006	East-Asian	MamA
0.74215510746422	knocked down	1-0006	East-Asian	MamA
1.07436415412475	knocked down	1-0006	East-Asian	MamA
0.721551226727279	knocked down	1-0006	East-Asian	MamA
0.950502240906134	knocked down	1-0006	East-Asian	MamA
1.01449868551453	knocked down	1-0006	East-Asian	MamA
2.1291259087775	wild-type	1-0006	East-Asian	HsdM
2.09052306955375	wild-type	1-0006	East-Asian	HsdM
2.56291642689121	wild-type	1-0006	East-Asian	MamB
3.12742441661084	wild-type	1-0006	East-Asian	MamB
0.187121460025116	knocked down	1-0006	East-Asian	MamA
-0.205441006497909	knocked down	1-0006	East-Asian	MamA
2.98717726725968	wild-type	1-0006	East-Asian	MamB
2.53469468821115	wild-type	1-0006	East-Asian	HsdM
2.14938881267001	wild-type	1-0006	East-Asian	HsdM
3.03279331363382	wild-type	1-0006	East-Asian	HsdM
2.8162668664244	wild-type	1-0006	East-Asian	HsdM
1.10926413949389	knocked down	1-0006	East-Asian	MamA
1.07365747027967	knocked down	1-0006	East-Asian	MamA
1.20142499805461	knocked down	1-0006	East-Asian	MamA
0.796273426313343	knocked down	1-0006	East-Asian	MamA
3.25477015235444	wild-type	1-0006	East-Asian	MamB
0.785956135327829	knocked down	1-0006	East-Asian	MamA
0.542121376518127	knocked down	1-0006	East-Asian	MamA
2.78552464286435	wild-type	1-0006	East-Asian	HsdM
2.26347234615523	wild-type	1-0006	East-Asian	HsdM
2.81309494493952	wild-type	1-0006	East-Asian	MamB
0.0530115930524738	knocked down	1-0006	East-Asian	MamA
0.441636633503461	knocked down	1-0006	East-Asian	MamA
0.791983518183977	knocked down	1-0006	East-Asian	MamA
0.890774308761394	knocked down	1-0006	East-Asian	MamA
3.00544891417682	wild-type	1-0006	East-Asian	MamB
2.6550813500438	wild-type	1-0006	East-Asian	MamB
2.74858928286334	wild-type	1-0006	East-Asian	HsdM
2.79627342631334	wild-type	1-0006	East-Asian	HsdM
3.24177492765111	wild-type	1-0006	East-Asian	MamB
1.01670632946619	knocked down	1-0006	East-Asian	MamA
1.53905289955658	knocked down	1-0006	East-Asian	MamA
0.0687009671044466	knocked down	1-0006	East-Asian	MamA
0.402777549865688	knocked down	1-0006	East-Asian	MamA
1.02330906429043	knocked down	1-0006	East-Asian	MamA
0.938908058166428	knocked down	1-0006	East-Asian	MamA
0.074364154124748	knocked down	1-0006	East-Asian	MamA
0.938908058166428	knocked down	1-0006	East-Asian	MamA
0.707042543384128	knocked down	1-0006	East-Asian	MamA
0.339516536909852	knocked down	1-0006	East-Asian	MamA
0.710683416082129	knocked down	1-0006	East-Asian	MamA
0.851736209966638	knocked down	1-0006	East-Asian	MamA
0.167385241963854	knocked down	1-0006	East-Asian	MamA
0.594296841530989	knocked down	1-0006	East-Asian	MamA
2.63773505888933	wild-type	1-0006	East-Asian	HsdM
2.53109566093974	wild-type	1-0006	East-Asian	HsdM
3.00600461619598	wild-type	1-0006	East-Asian	HsdM
2.30048616471821	wild-type	1-0006	East-Asian	HsdM
2.60460711030868	wild-type	1-0006	East-Asian	MamB
3.36154061636203	wild-type	1-0006	East-Asian	MamB
2.84450464073556	wild-type	1-0006	East-Asian	MamB
1.32652451669053	knocked down	1-0006	East-Asian	MamA
0.532896296866846	knocked down	1-0006	East-Asian	MamA
0.795416464576896	knocked down	1-0006	East-Asian	MamA
1.16738524196385	knocked down	1-0006	East-Asian	MamA
1.42400224996474	knocked down	1-0006	East-Asian	MamA
1.04510245515269	knocked down	1-0006	East-Asian	MamA
3.06887827860727	wild-type	1-0006	East-Asian	HsdM
2.16274101386209	wild-type	1-0006	East-Asian	HsdM
0.375513210126236	knocked down	1-0006	East-Asian	MamA
0.357046461467428	knocked down	1-0006	East-Asian	MamA
0.327710455960675	knocked down	1-0006	East-Asian	MamA
0.658855570746734	knocked down	1-0006	East-Asian	MamA
3.1433397679972	wild-type	1-0006	East-Asian	MamB
2.27980201054647	wild-type	1-0006	East-Asian	MamB
0.743044287794918	knocked down	1-0006	East-Asian	MamA
0.910695849286081	knocked down	1-0006	East-Asian	MamA
2.60924718299696	wild-type	1-0006	East-Asian	HsdM
2.51686905937178	wild-type	1-0006	East-Asian	HsdM
2.59084364607613	wild-type	1-0006	East-Asian	MamB
0.152738465999452	knocked down	1-0006	East-Asian	MamA
0.447103464754638	knocked down	1-0006	East-Asian	MamA
0.348892329718987	knocked down	1-0006	East-Asian	MamA
0.341866203619608	knocked down	1-0006	East-Asian	MamA
0.198834880588906	knocked down	1-0006	East-Asian	MamA
0.828466430643791	knocked down	1-0006	East-Asian	MamA
0.838485186468782	knocked down	1-0006	East-Asian	MamA
0.0842215524408248	knocked down	1-0006	East-Asian	MamA
2.3318535830281	wild-type	1-0006	East-Asian	MamB
-0.140043283228394	knocked down	1-0006	East-Asian	MamA
0.689621800554299	knocked down	1-0006	East-Asian	MamA
3.00303839558614	wild-type	1-0006	East-Asian	MamB
0.835153325771034	knocked down	1-0006	East-Asian	MamA
0.36052703020239	knocked down	1-0006	East-Asian	MamA
3.24051616867419	wild-type	1-0006	East-Asian	MamB
1.62886281011569	knocked down	1-0006	East-Asian	MamA
1.20013052058698	knocked down	1-0006	East-Asian	MamA
2.81943182939221	wild-type	1-0006	East-Asian	MamB
0.00785541188391967	knocked down	1-0006	East-Asian	MamA
0.112020004784397	knocked down	1-0006	East-Asian	MamA
0.345383543941848	knocked down	1-0006	East-Asian	MamA
0.102351356546364	knocked down	1-0006	East-Asian	MamA
2.62428549880716	wild-type	1-0006	East-Asian	MamB
0.125720915360972	knocked down	1-0006	East-Asian	MamA
0.347723682396365	knocked down	1-0006	East-Asian	MamA
0.373217752138574	knocked down	1-0006	East-Asian	MamA
0.663559503968103	knocked down	1-0006	East-Asian	MamA
2.67315488311068	wild-type	1-0006	East-Asian	HsdM
2.12810525430204	wild-type	1-0006	East-Asian	HsdM
0.749253252365387	knocked down	1-0006	East-Asian	MamA
0.444919217492763	knocked down	1-0006	East-Asian	MamA
0.575450780634988	knocked down	1-0006	East-Asian	MamA
0.0587365808861038	knocked down	1-0006	East-Asian	MamA
1.26533029237581	knocked down	1-0006	East-Asian	MamA
1.90355574377547	knocked down	1-0006	East-Asian	MamA
3.26378217006727	wild-type	1-0006	East-Asian	HsdM
2.78983377104073	wild-type	1-0006	East-Asian	HsdM
0.604117812342016	knocked down	1-0006	East-Asian	MamA
1.18777470660222	knocked down	1-0006	East-Asian	MamA
0.83097764979984	knocked down	1-0006	East-Asian	MamA
1.55078011943649	knocked down	1-0006	East-Asian	MamA
3.04257679106229	wild-type	1-0006	East-Asian	MamB
0.205301476090137	knocked down	1-0006	East-Asian	MamA
0.141992084535456	knocked down	1-0006	East-Asian	MamA
2.59010259903943	wild-type	1-0006	East-Asian	MamB
0.357046461467428	knocked down	1-0006	East-Asian	MamA
0.492224932271119	knocked down	1-0006	East-Asian	MamA
2.61702846619695	wild-type	1-0006	East-Asian	HsdM
2.61630075115459	wild-type	1-0006	East-Asian	HsdM
0.986238806912474	knocked down	1-0006	East-Asian	MamA
0.63797409377363	knocked down	1-0006	East-Asian	MamA
2.89037305857361	wild-type	1-0006	East-Asian	MamB
1.5246464099635	knocked down	1-0006	East-Asian	MamA
1.32711760818538	knocked down	1-0006	East-Asian	MamA
0.871387297548011	knocked down	1-0006	East-Asian	MamA
0.964293376586342	knocked down	1-0006	East-Asian	MamA
2.95146423003352	wild-type	1-0006	East-Asian	MamB
2.31281568148542	wild-type	1-0006	East-Asian	HsdM
2.08842562061505	wild-type	1-0006	East-Asian	HsdM
0.366309382796396	knocked down	1-0006	East-Asian	MamA
0.330079413867159	knocked down	1-0006	East-Asian	MamA
0.300184124511752	knocked down	1-0006	East-Asian	MamA
0.862413762567128	knocked down	1-0006	East-Asian	MamA
2.52024439350056	wild-type	1-0006	East-Asian	HsdM
2.31341443436427	wild-type	1-0006	East-Asian	HsdM
3.4158007529615	wild-type	1-0006	East-Asian	MamB
0.291701222888853	knocked down	1-0006	East-Asian	MamA
0.533924223551507	knocked down	1-0006	East-Asian	MamA
0.628381671194806	knocked down	1-0006	East-Asian	MamA
0.778169456534216	knocked down	1-0006	East-Asian	MamA
2.28255670648641	wild-type	1-0006	East-Asian	MamB
3.47934304809629	wild-type	1-0006	East-Asian	MamB
2.3812359270345	wild-type	1-0006	East-Asian	MamB
1.90871602869146	knocked down	1-0006	East-Asian	MamA
0.75278927139263	knocked down	1-0006	East-Asian	MamA
1.06799150309168	knocked down	1-0006	East-Asian	MamA
0.492224932271119	knocked down	1-0006	East-Asian	MamA
3.59392725140705	wild-type	1-0006	East-Asian	MamB
3.05462404343678	wild-type	1-0006	East-Asian	MamB
0.928002104194705	knocked down	1-0006	East-Asian	MamA
0.828466430643791	knocked down	1-0006	East-Asian	MamA
-0.343974168717305	knocked down	1-0006	East-Asian	MamA
0.842639220553534	knocked down	1-0006	East-Asian	MamA
0.32533760174009	knocked down	1-0006	East-Asian	MamA
0.714315123577994	knocked down	1-0006	East-Asian	MamA
0.792842520913069	knocked down	1-0006	East-Asian	MamA
0.894780684679288	knocked down	1-0006	East-Asian	MamA
3.41635826240362	wild-type	1-0006	East-Asian	MamB
0.492224932271119	knocked down	1-0006	East-Asian	MamA
0.464459403888408	knocked down	1-0006	East-Asian	MamA
0.686851825224855	knocked down	1-0006	East-Asian	MamA
0.574452030134118	knocked down	1-0006	East-Asian	MamA
0.312216680006649	knocked down	1-0006	East-Asian	MamA
0.112020004784397	knocked down	1-0006	East-Asian	MamA
0.275813696356999	knocked down	1-0006	East-Asian	MamA
0.506957175951238	knocked down	1-0006	East-Asian	MamA
-0.427547547512231	knocked down	1-0006	East-Asian	MamA
0.817533684923086	knocked down	1-0006	East-Asian	MamA
0.0672816900191125	knocked down	1-0006	East-Asian	MamA
0.610952928535794	knocked down	1-0006	East-Asian	MamA
0.0342469107753205	knocked down	1-0006	East-Asian	MamA
0.737700966720608	knocked down	1-0006	East-Asian	MamA
1.67245494210517	knocked down	1-0006	East-Asian	MamA
0.185814078838329	knocked down	1-0006	East-Asian	MamA
1.98661426430975	wild-type	1-0006	East-Asian	MamB
-0.14496996430832	knocked down	1-0006	East-Asian	MamA
-0.0680934413493788	knocked down	1-0006	East-Asian	MamA
0.705218655605317	knocked down	1-0006	East-Asian	MamA
0.644651041418038	knocked down	1-0006	East-Asian	MamA
0.901167834197115	knocked down	1-0006	East-Asian	MamA
0.657912940826961	knocked down	1-0006	East-Asian	MamA
-0.131869351782694	knocked down	1-0006	East-Asian	MamA
0.070118849322642	knocked down	1-0006	East-Asian	MamA
0.0196446095875273	knocked down	1-0006	East-Asian	MamA
-0.169858937663955	knocked down	1-0006	East-Asian	MamA
1.41621890523945	knocked down	1-0006	East-Asian	MamA
1.54773002307654	knocked down	1-0006	East-Asian	MamA
1.92369496421992	wild-type	1-0006	East-Asian	MamB
0.463380753340299	knocked down	1-0006	East-Asian	MamA
0.521540499095675	knocked down	1-0006	East-Asian	MamA
0.692386467719527	knocked down	1-0006	East-Asian	MamA
1.12367405518189	knocked down	1-0006	East-Asian	MamA
0.745708545321974	knocked down	1-0006	East-Asian	MamA
1.14603136400347	knocked down	1-0006	East-Asian	MamA
1.32593118127568	knocked down	1-0006	East-Asian	MamA
0.286831361586735	knocked down	1-0006	East-Asian	MamA
3.58849569011851	wild-type	1-0006	East-Asian	MamB
0.517388855825208	knocked down	1-0006	East-Asian	MamA
0.95818025285973	knocked down	1-0006	East-Asian	MamA
1.04077003435665	knocked down	1-0006	East-Asian	MamA
1.1140834545391	knocked down	1-0006	East-Asian	MamA
0.886756776115321	knocked down	1-0006	East-Asian	MamA
0.97189853410751	knocked down	1-0006	East-Asian	MamA
2.91740698895551	wild-type	1-0006	East-Asian	MamB
0.989988991090406	knocked down	1-0006	East-Asian	MamA
0.992982135402389	knocked down	1-0006	East-Asian	MamA
0.467690525151421	knocked down	1-0006	East-Asian	MamA
0.607051114011736	knocked down	1-0006	East-Asian	MamA
2.66543679120877	wild-type	1-0006	East-Asian	MamB
1.3152092034627	knocked down	1-0006	East-Asian	MamA
0.638929837459388	knocked down	1-0006	East-Asian	MamA
0.982478848983127	knocked down	1-0006	East-Asian	MamA
0.428431094704193	knocked down	1-0006	East-Asian	MamA
1.02037824552548	knocked down	1-0006	East-Asian	MamA
1.47947643952913	knocked down	1-0006	East-Asian	MamA
2.0729504401058	wild-type	1-0006	East-Asian	HsdM
1.95664791597548	wild-type	1-0006	East-Asian	HsdM
1.03061016813643	knocked down	1-0006	East-Asian	MamA
1.10373656552545	knocked down	1-0006	East-Asian	MamA
0.297765523709108	knocked down	1-0006	East-Asian	MamA
0.535977882319482	knocked down	1-0006	East-Asian	MamA
0.272122363748162	knocked down	1-0006	East-Asian	MamA
0.00340950685272754	knocked down	1-0006	East-Asian	MamA
2.37091863604899	wild-type	1-0006	East-Asian	HsdM
2.25196183409598	wild-type	1-0006	East-Asian	HsdM
0.173994026039503	knocked down	1-0006	East-Asian	MamA
1.02915290029446	knocked down	1-0006	East-Asian	MamA
2.38522836495945	wild-type	1-0006	East-Asian	MamB
-0.0160159917349226	knocked down	1-0006	East-Asian	MamA
0.489048354750941	knocked down	1-0006	East-Asian	MamA
2.575949896724	wild-type	1-0006	East-Asian	MamB
0.79112400368677	knocked down	1-0006	East-Asian	MamA
0.229613542139195	knocked down	1-0006	East-Asian	MamA
0.815844346274685	knocked down	1-0006	East-Asian	MamA
0.605096242383513	knocked down	1-0006	East-Asian	MamA
2.01339359542535	wild-type	1-0006	East-Asian	MamB
3.03261151096949	wild-type	1-0006	East-Asian	MamB
2.96276752235538	wild-type	1-0006	East-Asian	MamB
1.68268686471613	knocked down	1-0006	East-Asian	MamA
0.561404959973614	knocked down	1-0006	East-Asian	MamA
1.0587365808861	knocked down	1-0006	East-Asian	MamA
1.20594654430607	knocked down	1-0006	East-Asian	MamA
0.936577998374519	knocked down	1-0006	East-Asian	MamA
0.573452587738145	knocked down	1-0006	East-Asian	MamA
2.44437263857321	wild-type	1-0006	East-Asian	MamB
2.48639585346892	knocked down	1-0006	East-Asian	MamA
0.00192448866613889	knocked down	1-0006	East-Asian	MamA
0.665436791208773	knocked down	1-0006	East-Asian	MamA
0.454722392523121	knocked down	1-0006	East-Asian	MamA
2.17695813057904	wild-type	1-0006	East-Asian	HsdM
2.17925934225215	wild-type	1-0006	East-Asian	HsdM
0.497503734504846	knocked down	1-0006	East-Asian	MamA
0.187121460025116	knocked down	1-0006	East-Asian	MamA
3.15691462546301	wild-type	1-0006	East-Asian	MamB
0.772954890468398	knocked down	1-0006	East-Asian	MamA
0.78250057669161	knocked down	1-0006	East-Asian	MamA
2.84781499937345	wild-type	1-0006	East-Asian	MamB
1.20852393675734	knocked down	1-0006	East-Asian	MamA
0.206591324223341	knocked down	1-0006	East-Asian	MamA
0.701563948037457	knocked down	1-0006	East-Asian	MamA
0.409513881361564	knocked down	1-0006	East-Asian	MamA
2.55306346737958	wild-type	1-0006	East-Asian	HsdM
3.1265729174178	wild-type	1-0006	East-Asian	HsdM
0.671988126038684	knocked down	1-0006	East-Asian	MamA
0.592324599199384	knocked down	1-0006	East-Asian	MamA
1.20981090833322	knocked down	1-0006	East-Asian	MamA
1.05587692674686	knocked down	1-0006	East-Asian	MamA
2.23404773455908	knocked down	1-0006	East-Asian	MamA
1.24914803856365	knocked down	1-0006	East-Asian	MamA
1.15474453126945	knocked down	1-0006	East-Asian	MamA
0.497503734504846	knocked down	1-0006	East-Asian	MamA
0.797985824189029	knocked down	1-0006	East-Asian	MamA
0.672921607171794	knocked down	1-0006	East-Asian	MamA
1.04654370905965	knocked down	1-0006	East-Asian	MamA
0.854207284006485	knocked down	1-0006	East-Asian	MamA
3.14586328629129	wild-type	1-0006	East-Asian	MamB
0.0152349422495172	knocked down	1-0006	East-Asian	MamA
0.630305264867635	knocked down	1-0006	East-Asian	MamA
3.60326114138448	wild-type	1-0006	East-Asian	MamB
0.724255435655657	knocked down	1-0006	East-Asian	MamA
0.381235927034499	knocked down	1-0006	East-Asian	MamA
1.78811166395366	knocked down	1-0006	East-Asian	MamA
1.29837055413982	knocked down	1-0006	East-Asian	MamA
3.17036294176375	wild-type	1-0006	East-Asian	MamB
0.348892329718987	knocked down	1-0006	East-Asian	MamA
-0.11888663163183	knocked down	1-0006	East-Asian	MamA
1.03352029527727	knocked down	1-0006	East-Asian	MamA
1.41844700613157	knocked down	1-0006	East-Asian	MamA
0.32533760174009	knocked down	1-0006	East-Asian	MamA
0.66731163882921	knocked down	1-0006	East-Asian	MamA
2.10891928589098	wild-type	1-0006	East-Asian	HsdM
2.6087594564741	wild-type	1-0006	East-Asian	HsdM
0.0269642348316243	knocked down	1-0006	East-Asian	MamA
0.00489299802805817	knocked down	1-0006	East-Asian	MamA
0.158081787073762	knocked down	1-0006	East-Asian	MamA
0.978709066224403	knocked down	1-0006	East-Asian	MamA
0.443825852498491	knocked down	1-0006	East-Asian	MamA
0.346554087649786	knocked down	1-0006	East-Asian	MamA
0.654136250081477	knocked down	1-0006	East-Asian	MamA
0.772083960746272	knocked down	1-0006	East-Asian	MamA
-0.00701786459761061	knocked down	1-0006	East-Asian	MamA
0.664498452937718	knocked down	1-0006	East-Asian	MamA
3.16390347323851	wild-type	1-0006	East-Asian	MamB
2.70270703900993	wild-type	1-0006	East-Asian	MamB
0.243503929922634	knocked down	1-0006	East-Asian	MamA
0.86159521216736	knocked down	1-0006	East-Asian	MamA
2.98811511754356	wild-type	1-0006	East-Asian	MamB
2.89757854267939	wild-type	1-0006	East-Asian	MamB
0.85585231843887	knocked down	1-0006	East-Asian	MamA
0.783365242609545	knocked down	1-0006	East-Asian	MamA
-0.21749942330839	knocked down	1-0006	East-Asian	MamA
0.331262435697195	knocked down	1-0006	East-Asian	MamA
-0.14496996430832	knocked down	1-0006	East-Asian	MamA
0.480543127223484	knocked down	1-0006	East-Asian	MamA
0.735021866524727	knocked down	1-0006	East-Asian	MamA
0.62934378863019	knocked down	1-0006	East-Asian	MamA
-0.071216159107279	knocked down	1-0006	East-Asian	MamA
0.350060031151321	knocked down	1-0006	East-Asian	MamA
2.27489174827521	wild-type	1-0006	East-Asian	HsdM
2.70658678756265	wild-type	1-0006	East-Asian	HsdM
2.49882042259559	wild-type	1-0006	East-Asian	HsdM
1.97530781897306	wild-type	1-0006	East-Asian	HsdM
0.173994026039503	knocked down	1-0006	East-Asian	MamA
0.505909847381911	knocked down	1-0006	East-Asian	MamA
1.17662908620747	knocked down	1-0006	East-Asian	MamA
1.42122730192535	knocked down	1-0006	East-Asian	MamA
1.22643789691928	knocked down	1-0006	East-Asian	MamA
0.912277751901689	knocked down	1-0006	East-Asian	MamA
0.682223348233139	knocked down	1-0006	East-Asian	MamA
0.989988991090406	knocked down	1-0006	East-Asian	MamA
0.561404959973614	knocked down	1-0006	East-Asian	MamA
-0.207157479086931	knocked down	1-0006	East-Asian	MamA
0.729648694425875	knocked down	1-0006	East-Asian	MamA
0.0926174735618814	knocked down	1-0006	East-Asian	MamA
2.5571138509234	wild-type	1-0006	East-Asian	MamB
0.560396434912698	knocked down	1-0006	East-Asian	MamA
1.36919189132952	knocked down	1-0006	East-Asian	MamA
2.88675677611532	wild-type	1-0006	East-Asian	MamB
1.93968390924234	wild-type	1-0006	East-Asian	MamB
0.592324599199384	knocked down	1-0006	East-Asian	MamA
0.928002104194705	knocked down	1-0006	East-Asian	MamA
1.37780502163423	knocked down	1-0006	East-Asian	MamA
1.66637451957516	knocked down	1-0006	East-Asian	MamA
-0.229659477581779	knocked down	1-0006	East-Asian	MamA
0.514267264183497	knocked down	1-0006	East-Asian	MamA
0.610952928535794	knocked down	1-0006	East-Asian	MamA
1.83139576168246	knocked down	1-0006	East-Asian	MamA
1.16008044134062	knocked down	1-0006	East-Asian	MamA
0.196240104636039	knocked down	1-0006	East-Asian	MamA
2.74681720213584	wild-type	1-0006	East-Asian	MamB
3.39402964115232	wild-type	1-0006	East-Asian	MamB
0.175312157735482	knocked down	1-0006	East-Asian	MamA
0.82511132438541	knocked down	1-0006	East-Asian	MamA
2.38408879535763	wild-type	1-0006	East-Asian	HsdM
2.37809124225631	wild-type	1-0006	East-Asian	HsdM
0.5287772504117	knocked down	1-0006	East-Asian	MamA
0.249773800898719	knocked down	1-0006	East-Asian	MamA
2.47171927683648	wild-type	1-0006	East-Asian	HsdM
2.6967530510254	wild-type	1-0006	East-Asian	HsdM
3.16024687094695	wild-type	1-0006	East-Asian	MamB
0.616785935299365	knocked down	1-0006	East-Asian	MamA
0.159414530855274	knocked down	1-0006	East-Asian	MamA
0.30621294666117	knocked down	1-0006	East-Asian	MamA
0.918588073786832	knocked down	1-0006	East-Asian	MamA
0.982478848983127	knocked down	1-0006	East-Asian	MamA
1.63510305791887	knocked down	1-0006	East-Asian	MamA
3.03733095038988	wild-type	1-0006	East-Asian	MamB
0.967340252145206	knocked down	1-0006	East-Asian	MamA
0.298975330942175	knocked down	1-0006	East-Asian	MamA
3.02257691759069	wild-type	1-0006	East-Asian	MamB
1.13794146407137	knocked down	1-0006	East-Asian	MamA
1.26347234615523	knocked down	1-0006	East-Asian	MamA
3.33318277955638	wild-type	1-0006	East-Asian	MamB
1.79798582418903	knocked down	1-0006	East-Asian	MamA
1.24601514907868	knocked down	1-0006	East-Asian	MamA
1.95127188351755	knocked down	1-0006	East-Asian	MamA
1.53956476581737	knocked down	1-0006	East-Asian	MamA
0.198834880588906	knocked down	1-0006	East-Asian	MamA
0.00340950685272754	knocked down	1-0006	East-Asian	MamA
3.0889502687962	wild-type	1-0006	East-Asian	MamB
2.16837849160094	wild-type	1-0006	East-Asian	HsdM
2.73144197624893	wild-type	1-0006	East-Asian	HsdM
3.00155299515542	wild-type	1-0006	East-Asian	MamB
2.94471679655002	wild-type	1-0006	East-Asian	MamB
0.938908058166428	knocked down	1-0006	East-Asian	MamA
2.18385078294783	knocked down	1-0006	East-Asian	MamA
0.66167977074988	knocked down	1-0006	East-Asian	MamA
0.285611323424479	knocked down	1-0006	East-Asian	MamA
0.191036510028499	knocked down	1-0006	East-Asian	MamA
0.564426311948851	knocked down	1-0006	East-Asian	MamA
-0.0372324776446184	knocked down	1-0006	East-Asian	MamA
-0.626782247861426	knocked down	1-0006	East-Asian	MamA
3.36976770256881	wild-type	1-0006	East-Asian	MamB
1.83515332577103	wild-type	1-0006	East-Asian	MamB
2.71431512357799	wild-type	1-0006	East-Asian	MamB
0.309818183958132	knocked down	1-0006	East-Asian	MamA
0.829303989471895	knocked down	1-0006	East-Asian	MamA
0.346554087649786	knocked down	1-0006	East-Asian	MamA
0.942008962188584	knocked down	1-0006	East-Asian	MamA
0.230881845553528	knocked down	1-0006	East-Asian	MamA
0.301391906115058	knocked down	1-0006	East-Asian	MamA
0.675718432036515	knocked down	1-0006	East-Asian	MamA
0.0672816900191125	knocked down	1-0006	East-Asian	MamA
2.56341989750909	wild-type	1-0006	East-Asian	MamB
2.0866754141152	knocked down	1-0006	East-Asian	MamA
2.2178285739663	knocked down	1-0006	East-Asian	MamA
2.79905504164024	wild-type	1-0006	East-Asian	HsdM
2.73256164649596	wild-type	1-0006	East-Asian	HsdM
2.39855131393389	wild-type	1-0006	East-Asian	HsdM
3.05659237185991	wild-type	1-0006	East-Asian	HsdM
3.16091239744515	wild-type	1-0006	East-Asian	MamB
2.77012244441299	wild-type	1-0006	East-Asian	MamB
2.65838433277394	wild-type	1-0006	East-Asian	HsdM
2.11477061580043	wild-type	1-0006	East-Asian	HsdM
1.46176126388206	knocked down	1-0006	East-Asian	MamA
1.63270615582095	knocked down	1-0006	East-Asian	MamA
-0.37065621136981	knocked down	1-0006	East-Asian	MamA
-0.126987130402947	knocked down	1-0006	East-Asian	MamA
0.319388335408904	knocked down	1-0006	East-Asian	MamA
0.295342861442253	knocked down	1-0006	East-Asian	MamA
1.50118743713951	knocked down	1-0006	East-Asian	MamA
0.485864767491679	knocked down	1-0006	East-Asian	MamA
2.87767621227595	wild-type	1-0006	East-Asian	MamB
0.275813696356999	knocked down	1-0006	East-Asian	MamA
0.307415693742828	knocked down	1-0006	East-Asian	MamA
0.249773800898719	knocked down	1-0006	East-Asian	MamA
0.931126512651143	knocked down	1-0006	East-Asian	MamA
2.61095292853579	wild-type	1-0006	East-Asian	MamB
0.741265378764488	knocked down	1-0006	East-Asian	MamA
-0.0727800563237153	knocked down	1-0006	East-Asian	MamA
0.361685356270949	knocked down	1-0006	East-Asian	MamA
0.962767522355382	knocked down	1-0006	East-Asian	MamA
0.398269124193941	knocked down	1-0006	East-Asian	MamA
-0.362982283484389	knocked down	1-0006	East-Asian	MamA
2.86159521216736	wild-type	1-0006	East-Asian	MamB
0.486926744014338	knocked down	1-0006	East-Asian	MamA
0.695145847025936	knocked down	1-0006	East-Asian	MamA
2.18875402220101	wild-type	1-0006	East-Asian	MamB
2.73076975675666	wild-type	1-0006	East-Asian	MamB
1.04293787103936	knocked down	1-0006	East-Asian	MamA
1.32474377788281	knocked down	1-0006	East-Asian	MamA
2.68245512508975	wild-type	1-0006	East-Asian	MamB
0.100964816275401	knocked down	1-0006	East-Asian	MamA
0.275813696356999	knocked down	1-0006	East-Asian	MamA
0.0814120188540007	knocked down	1-0006	East-Asian	MamA
0.144686193704719	knocked down	1-0006	East-Asian	MamA
0.717032917237419	knocked down	1-0006	East-Asian	MamA
-0.0790526533392453	knocked down	1-0006	East-Asian	MamA
0.277042044699309	knocked down	1-0006	East-Asian	MamA
0.919374926842001	knocked down	1-0006	East-Asian	MamA
0.38237775142405	knocked down	1-0006	East-Asian	MamA
0.43064042904238	knocked down	1-0006	East-Asian	MamA
0.451462063359535	knocked down	1-0006	East-Asian	MamA
-0.168186247574098	knocked down	1-0006	East-Asian	MamA
0.494338771537037	knocked down	1-0006	East-Asian	MamA
0.179259342252145	knocked down	1-0006	East-Asian	MamA
0.109264139493888	knocked down	1-0006	East-Asian	MamA
0.435048973468701	knocked down	1-0006	East-Asian	MamA
3.62886281011569	wild-type	1-0006	East-Asian	MamB
0.389209784906475	knocked down	1-0006	East-Asian	MamA
1.0863251178792	knocked down	1-0006	East-Asian	MamA
-0.220963278611961	knocked down	1-0006	East-Asian	MamA
-0.0996290147824856	knocked down	1-0006	East-Asian	MamA
0.338340266937728	knocked down	1-0006	East-Asian	MamA
0.660738984905724	knocked down	1-0006	East-Asian	MamA
3.70954663007982	wild-type	1-0006	East-Asian	MamB
0.362842753076617	knocked down	1-0006	East-Asian	MamA
0.476271636195214	knocked down	1-0006	East-Asian	MamA
3.47827547239989	wild-type	1-0006	East-Asian	MamB
3.0573074623533	wild-type	1-0006	East-Asian	HsdM
2.62380283067255	wild-type	1-0006	East-Asian	HsdM
0.747481987513194	knocked down	1-0006	East-Asian	MamA
1.2007779045067	knocked down	1-0006	East-Asian	MamA
2.49934676154375	wild-type	1-0006	East-Asian	MamB
2.34684657524144	wild-type	1-0006	East-Asian	HsdM
2.72110003202747	wild-type	1-0006	East-Asian	HsdM
0.408393341467648	knocked down	1-0006	East-Asian	MamA
0.821748397359446	knocked down	1-0006	East-Asian	MamA
3.31401293884947	wild-type	1-0006	East-Asian	MamB
3.54033222485181	wild-type	1-0006	East-Asian	MamB
1.14871794772377	knocked down	1-0006	East-Asian	MamA
1.66684315529176	knocked down	1-0006	East-Asian	MamA
2.84616076953374	wild-type	1-0006	East-Asian	HsdM
3.19559068079393	wild-type	1-0006	East-Asian	HsdM
1.17003238957055	knocked down	1-0006	East-Asian	MamA
0.475201784428805	knocked down	1-0006	East-Asian	MamA
2.83577863606366	wild-type	1-0006	East-Asian	MamB
1.38920978490647	knocked down	1-0006	East-Asian	MamA
1.33007941386716	knocked down	1-0006	East-Asian	MamA
0.0771874329922752	knocked down	1-0006	East-Asian	MamA
0.547221046164965	knocked down	1-0006	East-Asian	MamA
0.868130648217306	knocked down	1-0006	East-Asian	MamA
0.355884403377303	knocked down	1-0006	East-Asian	MamA
3.00674521941598	wild-type	1-0006	East-Asian	MamB
0.84097904195734	knocked down	1-0006	East-Asian	MamA
0.873012869597053	knocked down	1-0006	East-Asian	MamA
1.64322286604232	knocked down	1-0006	East-Asian	MamA
1.6307857628041	knocked down	1-0006	East-Asian	MamA
0.851736209966638	knocked down	1-0006	East-Asian	MamA
0.562412780511203	knocked down	1-0006	East-Asian	MamA
3.22484744913293	wild-type	1-0006	East-Asian	MamB
0.197538075970454	knocked down	1-0006	East-Asian	MamA
1.08912510913343	knocked down	1-0006	East-Asian	MamA
3.31026820580973	wild-type	1-0006	East-Asian	HsdM
2.67711481385957	wild-type	1-0006	East-Asian	HsdM
0.426218371815081	knocked down	1-0006	East-Asian	MamA
0.0240408396248582	knocked down	1-0006	East-Asian	MamA
0.506957175951238	knocked down	1-0006	East-Asian	MamA
0.83931695071257	knocked down	1-0006	East-Asian	MamA
2.85564679168578	wild-type	1-0006	East-Asian	MamB
0.447103464754638	knocked down	1-0006	East-Asian	MamA
0.298975330942175	knocked down	1-0006	East-Asian	MamA
0.99223443129605	knocked down	1-0006	East-Asian	MamA
-0.0235575407475418	knocked down	1-0006	East-Asian	MamA
3.23499614811853	wild-type	1-0006	East-Asian	MamB
0.593311057385434	knocked down	1-0006	East-Asian	MamA
1.43284638519219	knocked down	1-0006	East-Asian	MamA
2.90315803321723	wild-type	1-0006	East-Asian	MamB
2.7201972190813	wild-type	1-0006	East-Asian	MamB
0.107884230215192	knocked down	1-0006	East-Asian	MamA
0.424002249964742	knocked down	1-0006	East-Asian	MamA
0.80736785278961	knocked down	1-0006	East-Asian	MamA
1.17531215773548	knocked down	1-0006	East-Asian	MamA
-0.220963278611961	knocked down	1-0006	East-Asian	MamA
-0.233152687619875	knocked down	1-0006	East-Asian	MamA
-0.107621805536016	knocked down	1-0006	East-Asian	MamA
-0.159851764308574	knocked down	1-0006	East-Asian	MamA
0.0414930085842072	knocked down	1-0006	East-Asian	MamA
0.622595453381488	knocked down	1-0006	East-Asian	MamA
0.370918636048986	knocked down	1-0006	East-Asian	MamA
-0.171533569356209	knocked down	1-0006	East-Asian	MamA
3.11854416341604	wild-type	1-0006	East-Asian	MamB
-0.301183171245567	knocked down	1-0006	East-Asian	MamA
0.583415990879788	knocked down	1-0006	East-Asian	MamA
-0.207157479086931	knocked down	1-0006	East-Asian	MamA
0.209167566052373	knocked down	1-0006	East-Asian	MamA
2.56969850016348	wild-type	1-0006	East-Asian	MamB
0.415103563057201	wild-type	1-0006	East-Asian	HsdM
-0.176569159253508	wild-type	1-0006	East-Asian	HsdM
0.700648822703323	knocked down	1-0006	East-Asian	MamA
0.327710455960675	knocked down	1-0006	East-Asian	MamA
0.677579974283038	knocked down	1-0006	East-Asian	MamA
0.666374519575157	knocked down	1-0006	East-Asian	MamA
0.662619943504488	knocked down	1-0006	East-Asian	MamA
0.479476439529131	knocked down	1-0006	East-Asian	MamA
2.78055318151508	wild-type	1-0006	East-Asian	HsdM
2.31700174257203	wild-type	1-0006	East-Asian	HsdM
0.486926744014338	knocked down	1-0006	East-Asian	MamA
0.334805691774333	knocked down	1-0006	East-Asian	MamA
3.12895584983455	wild-type	1-0006	East-Asian	MamB
2.69445649683003	wild-type	1-0006	East-Asian	MamB
3.20255671383924	wild-type	1-0006	East-Asian	MamB
0.340691848617126	knocked down	1-0006	East-Asian	MamA
1.09957694215116	knocked down	1-0006	East-Asian	MamA
-0.0821992086561093	knocked down	1-0006	East-Asian	MamA
0.948961722830351	knocked down	1-0006	East-Asian	MamA
1.07011884932264	knocked down	1-0006	East-Asian	MamA
0.510094607504998	knocked down	1-0006	East-Asian	MamA
2.8515300959523	wild-type	1-0006	East-Asian	MamB
2.76005505345722	wild-type	1-0006	East-Asian	HsdM
2.60044277840888	wild-type	1-0006	East-Asian	HsdM
2.30290021262033	knocked down	1-0006	East-Asian	MamA
1.78552464286435	knocked down	1-0006	East-Asian	MamA
3.47974318540044	wild-type	1-0006	East-Asian	MamB
0.21814835564574	knocked down	1-0006	East-Asian	MamA
0.40502649036925	knocked down	1-0006	East-Asian	MamA
0.870573824145635	knocked down	1-0006	East-Asian	MamA
0.345383543941848	knocked down	1-0006	East-Asian	MamA
2.55128784248973	wild-type	1-0006	East-Asian	MamB
0.140643140967437	knocked down	1-0006	East-Asian	MamA
1.25601654123618	knocked down	1-0006	East-Asian	MamA
0.301391906115058	knocked down	1-0006	East-Asian	MamA
1.01523494224952	knocked down	1-0006	East-Asian	MamA
2.47840896257263	wild-type	1-0006	East-Asian	HsdM
3.24977380089872	wild-type	1-0006	East-Asian	HsdM
-0.38807326444722	knocked down	1-0006	East-Asian	MamA
1.10719378031406	knocked down	1-0006	East-Asian	MamA
0.0342469107753205	knocked down	1-0006	East-Asian	MamA
0.150059365803571	knocked down	1-0006	East-Asian	MamA
2.0619469309234	wild-type	1-0006	East-Asian	HsdM
2.73099386472462	wild-type	1-0006	East-Asian	HsdM
0.897977794111546	knocked down	1-0006	East-Asian	MamA
0.398269124193941	knocked down	1-0006	East-Asian	MamA
0.747481987513194	knocked down	1-0006	East-Asian	MamA
0.418447006131572	knocked down	1-0006	East-Asian	MamA
3.16423543252227	wild-type	1-0006	East-Asian	MamB
2.43559909551193	wild-type	1-0006	East-Asian	HsdM
2.92408705419132	wild-type	1-0006	East-Asian	HsdM
0.868130648217306	knocked down	1-0006	East-Asian	MamA
0.560396434912698	knocked down	1-0006	East-Asian	MamA
-0.0326597478547943	knocked down	1-0006	East-Asian	MamA
0.497503734504846	knocked down	1-0006	East-Asian	MamA
2.1874481202871	wild-type	1-0006	East-Asian	HsdM
2.54823882048646	wild-type	1-0006	East-Asian	HsdM
0.735915452828234	knocked down	1-0006	East-Asian	MamA
0.995222925458182	knocked down	1-0006	East-Asian	MamA
3.0045222682198	wild-type	1-0006	East-Asian	MamB
2.2023950944988	wild-type	1-0006	East-Asian	HsdM
2.56417477415013	wild-type	1-0006	East-Asian	HsdM
2.39204694421	wild-type	1-0006	East-Asian	MamB
1.03424691077532	knocked down	1-0006	East-Asian	MamA
0.865683327798563	knocked down	1-0006	East-Asian	MamA
2.58515253399827	wild-type	1-0006	East-Asian	HsdM
1.53032327132145	wild-type	1-0006	East-Asian	HsdM
2.40755236502828	wild-type	1-0006	East-Asian	HsdM
2.65460887745373	wild-type	1-0006	East-Asian	HsdM
2.71771156642636	wild-type	1-0006	East-Asian	MamB
2.65649784013392	wild-type	1-0006	East-Asian	HsdM
2.48798793938465	wild-type	1-0006	East-Asian	HsdM
2.3318535830281	wild-type	1-0006	East-Asian	MamB
0.432846385192187	knocked down	1-0006	East-Asian	MamA
0.582422741242697	knocked down	1-0006	East-Asian	MamA
1.14804677067473	knocked down	1-0006	East-Asian	MamA
0.486926744014338	knocked down	1-0006	East-Asian	MamA
0.120256154884161	knocked down	1-0006	East-Asian	MamA
0.213023323467873	knocked down	1-0006	East-Asian	MamA
1.91385792187444	knocked down	1-0006	East-Asian	MamA
1.95664791597548	knocked down	1-0006	East-Asian	MamA
2.80736785278961	wild-type	1-0006	East-Asian	HsdM
2.24256109465922	wild-type	1-0006	East-Asian	HsdM
0.589361171164838	knocked down	1-0006	East-Asian	MamA
0.00637496532928879	knocked down	1-0006	East-Asian	MamA
0.696982505505553	knocked down	1-0006	East-Asian	MamA
1.39826912419394	knocked down	1-0006	East-Asian	MamA
2.9381317896296	wild-type	1-0006	East-Asian	MamB
1.69606446854114	knocked down	1-0006	East-Asian	MamA
0.85503003569168	knocked down	1-0006	East-Asian	MamA
0.983984008265077	knocked down	1-0006	East-Asian	MamA
0.968100966658422	knocked down	1-0006	East-Asian	MamA
0.897977794111546	knocked down	1-0006	East-Asian	MamA
1.0159708234391	knocked down	1-0006	East-Asian	MamA
0.425110736412582	knocked down	1-0006	East-Asian	MamA
0.209167566052373	knocked down	1-0006	East-Asian	MamA
0.727853180764261	knocked down	1-0006	East-Asian	MamA
-0.227916039253728	knocked down	1-0006	East-Asian	MamA
1.21238141242685	knocked down	1-0006	East-Asian	MamA
0.378949563575166	knocked down	1-0006	East-Asian	MamA
1.34069184861713	knocked down	1-0006	East-Asian	MamA
0.61192673555278	knocked down	1-0006	East-Asian	MamA
3.47907622822482	wild-type	1-0006	East-Asian	MamB
2.6967530510254	wild-type	1-0006	East-Asian	MamB
-0.0853526416949836	knocked down	1-0006	East-Asian	MamA
-0.407675400800616	knocked down	1-0006	East-Asian	MamA
2.80609207227238	wild-type	1-0006	East-Asian	HsdM
3.17860222766967	wild-type	1-0006	East-Asian	HsdM
2.68338186033337	wild-type	1-0006	East-Asian	MamB
0.920947346660755	knocked down	1-0006	East-Asian	MamA
1.52205861547434	knocked down	1-0006	East-Asian	MamA
3.40727193057489	wild-type	1-0006	East-Asian	MamB
0.956647915975483	knocked down	1-0006	East-Asian	MamA
1.50486175794904	knocked down	1-0006	East-Asian	MamA
2.47386335308604	wild-type	1-0006	East-Asian	MamB
0.260991356651475	knocked down	1-0006	East-Asian	MamA
0.7554356097211	knocked down	1-0006	East-Asian	MamA
2.69789995866263	wild-type	1-0006	East-Asian	MamB
0.567441349704283	knocked down	1-0006	East-Asian	MamA
0.796273426313343	knocked down	1-0006	East-Asian	MamA
0.31819553249607	knocked down	1-0006	East-Asian	MamA
0.0800051976397549	knocked down	1-0006	East-Asian	MamA
0.463380753340299	knocked down	1-0006	East-Asian	MamA
0.808217746799985	knocked down	1-0006	East-Asian	MamA
0.565432024809997	knocked down	1-0006	East-Asian	MamA
0.367463077412766	knocked down	1-0006	East-Asian	MamA
0.320580152941276	knocked down	1-0006	East-Asian	MamA
0.440540776982188	knocked down	1-0006	East-Asian	MamA
3.12589135602995	wild-type	1-0006	East-Asian	HsdM
2.86425380467414	wild-type	1-0006	East-Asian	HsdM
-0.00851366052309176	knocked down	1-0006	East-Asian	MamA
0.12435666462963	knocked down	1-0006	East-Asian	MamA
3.07665848888337	wild-type	1-0006	East-Asian	MamB
1.02842371400606	knocked down	1-0006	East-Asian	MamA
-0.181622386979793	knocked down	1-0006	East-Asian	MamA
0.416218905239454	knocked down	1-0006	East-Asian	MamA
0.127083877239283	knocked down	1-0006	East-Asian	MamA
1.17003238957055	knocked down	1-0006	East-Asian	MamA
1.66073898490572	knocked down	1-0006	East-Asian	MamA
0.618725041829047	knocked down	1-0006	East-Asian	MamA
0.685002215944731	knocked down	1-0006	East-Asian	MamA
-0.00552361791728022	knocked down	1-0006	East-Asian	MamA
0.772954890468398	knocked down	1-0006	East-Asian	MamA
2.41705484637779	wild-type	1-0006	East-Asian	MamB
3.117858797588	wild-type	1-0006	East-Asian	MamB
3.43229521229498	wild-type	1-0006	East-Asian	MamB
0.632226297163311	knocked down	1-0006	East-Asian	MamA
0.0356990448092328	knocked down	1-0006	East-Asian	MamA
2.64940144097144	wild-type	1-0006	East-Asian	MamB
0.406149647328187	knocked down	1-0006	East-Asian	MamA
1.21750872138969	knocked down	1-0006	East-Asian	MamA
0.143339767997202	knocked down	1-0006	East-Asian	MamA
0.895580626502328	knocked down	1-0006	East-Asian	MamA
0.273353857669194	knocked down	1-0006	East-Asian	MamA
1.26780383784397	knocked down	1-0006	East-Asian	MamA
1.08351968181599	knocked down	1-0006	East-Asian	MamA
1.17267468891885	knocked down	1-0006	East-Asian	MamA
2.70430584631141	wild-type	1-0006	East-Asian	MamB
2.86772304967218	wild-type	1-0006	East-Asian	MamB
3.3727869468676	wild-type	1-0006	East-Asian	MamB
0.858316358390351	knocked down	1-0006	East-Asian	MamA
0.582422741242697	knocked down	1-0006	East-Asian	MamA
0.582422741242697	knocked down	1-0006	East-Asian	MamA
0.84097904195734	knocked down	1-0006	East-Asian	MamA
0.586391643445643	knocked down	1-0006	East-Asian	MamA
0.490107991259018	knocked down	1-0006	East-Asian	MamA
2.86261832762112	wild-type	1-0006	East-Asian	HsdM
2.85790597720684	wild-type	1-0006	East-Asian	HsdM
0.736808485998741	knocked down	1-0006	East-Asian	MamA
1.19364065340866	knocked down	1-0006	East-Asian	MamA
2.9926083317882	wild-type	1-0006	East-Asian	HsdM
2.78358132813993	wild-type	1-0006	East-Asian	HsdM
2.75675696078971	wild-type	1-0006	East-Asian	MamB
3.03769334552891	wild-type	1-0006	East-Asian	HsdM
2.63677852310697	wild-type	1-0006	East-Asian	HsdM
0.864866630895413	knocked down	1-0006	East-Asian	MamA
0.403902458336629	knocked down	1-0006	East-Asian	MamA
0.188427657525741	knocked down	1-0006	East-Asian	MamA
0.407271930574894	knocked down	1-0006	East-Asian	MamA
0.172674688918851	knocked down	1-0006	East-Asian	MamA
-0.33268836117079	knocked down	1-0006	East-Asian	MamA
1.04365975999157	knocked down	1-0006	East-Asian	MamA
0.696982505505553	knocked down	1-0006	East-Asian	MamA
2.56994907681038	wild-type	1-0006	East-Asian	MamB
2.80673010355316	wild-type	1-0006	East-Asian	MamB
2.66871617735412	wild-type	1-0006	East-Asian	MamB
0.272122363748162	knocked down	1-0006	East-Asian	MamA
0.569447879987245	knocked down	1-0006	East-Asian	MamA
0.128445552697508	knocked down	1-0006	East-Asian	MamA
0.352392602461211	knocked down	1-0006	East-Asian	MamA
1.46876595944713	knocked down	1-0006	East-Asian	MamA
0.99223443129605	knocked down	1-0006	East-Asian	MamA
1.9213401839786	knocked down	1-0006	East-Asian	MamA
1.58043418814924	knocked down	1-0006	East-Asian	MamA
0.479476439529131	knocked down	1-0006	East-Asian	MamA
0.439444087426611	knocked down	1-0006	East-Asian	MamA
2.73546872886093	wild-type	1-0006	East-Asian	MamB
2.58366419647883	wild-type	1-0006	East-Asian	HsdM
3.03968489324428	wild-type	1-0006	East-Asian	HsdM
1.09331493310696	knocked down	1-0006	East-Asian	MamA
0.114770615800432	knocked down	1-0006	East-Asian	MamA
1.39657482565407	knocked down	1-0006	East-Asian	MamA
1.06941008240056	knocked down	1-0006	East-Asian	MamA
2.67781249826467	wild-type	1-0006	East-Asian	HsdM
2.5246464099635	wild-type	1-0006	East-Asian	HsdM
1.24224667926277	knocked down	1-0006	East-Asian	MamA
0.309818183958132	knocked down	1-0006	East-Asian	MamA
0.43614900786503	knocked down	1-0006	East-Asian	MamA
0.280720827077407	knocked down	1-0006	East-Asian	MamA
2.77599901074966	wild-type	1-0006	East-Asian	MamB
0.900370985217514	knocked down	1-0006	East-Asian	MamA
-0.455836591943655	knocked down	1-0006	East-Asian	MamA
0.0601642851499612	knocked down	1-0006	East-Asian	MamA
0.624526772332414	knocked down	1-0006	East-Asian	MamA
0.0122876581991804	knocked down	1-0006	East-Asian	MamA
0.690543945066927	knocked down	1-0006	East-Asian	MamA
3.36587650934987	wild-type	1-0006	East-Asian	MamB
0.406149647328187	knocked down	1-0006	East-Asian	MamA
0.456891859158838	knocked down	1-0006	East-Asian	MamA
0.344212049731404	knocked down	1-0006	East-Asian	MamA
0.361685356270949	knocked down	1-0006	East-Asian	MamA
0.520503707789186	knocked down	1-0006	East-Asian	MamA
0.579438882803876	knocked down	1-0006	East-Asian	MamA
3.25601654123618	wild-type	1-0006	East-Asian	MamB
3.54989117391422	wild-type	1-0006	East-Asian	MamB
2.5938040336557	wild-type	1-0006	East-Asian	HsdM
2.87423084775372	wild-type	1-0006	East-Asian	HsdM
2.85729018647079	wild-type	1-0006	East-Asian	HsdM
2.40137017970151	wild-type	1-0006	East-Asian	HsdM
1.36052703020239	knocked down	1-0006	East-Asian	MamA
0.627418911705698	knocked down	1-0006	East-Asian	MamA
2.86323184880447	wild-type	1-0006	East-Asian	MamB
2.73412772640259	wild-type	1-0006	East-Asian	MamB
0.475201784428805	knocked down	1-0006	East-Asian	MamA
1.22707358542522	knocked down	1-0006	East-Asian	MamA
2.84014823569143	wild-type	1-0006	East-Asian	HsdM
3.00118140596061	wild-type	1-0006	East-Asian	HsdM
3.20643015625793	wild-type	1-0006	East-Asian	MamB
0.574452030134118	knocked down	1-0006	East-Asian	MamA
0.415103563057201	knocked down	1-0006	East-Asian	MamA
0.93968390924234	knocked down	1-0006	East-Asian	MamA
1.19299005811425	knocked down	1-0006	East-Asian	MamA
0.964293376586342	knocked down	1-0006	East-Asian	MamA
0.767721408160205	knocked down	1-0006	East-Asian	MamA
1.01007323713374	knocked down	1-0006	East-Asian	MamA
1.31819553249607	knocked down	1-0006	East-Asian	MamA
3.23988637709336	wild-type	1-0006	East-Asian	MamB
2.10822933129108	wild-type	1-0006	East-Asian	MamB
2.37866351320427	wild-type	1-0006	East-Asian	HsdM
2.89378013325498	wild-type	1-0006	East-Asian	HsdM
0.504861757949045	knocked down	1-0006	East-Asian	MamA
0.7554356097211	knocked down	1-0006	East-Asian	MamA
0.541099275844211	knocked down	1-0006	East-Asian	MamA
0.0371497186779579	knocked down	1-0006	East-Asian	MamA
0.0644389402502872	knocked down	1-0006	East-Asian	MamA
0.340691848617126	knocked down	1-0006	East-Asian	MamA
-0.106019700939515	knocked down	1-0006	East-Asian	MamA
0.871387297548011	knocked down	1-0006	East-Asian	MamA
2.44928441005416	wild-type	1-0006	East-Asian	MamB
2.72042297528877	wild-type	1-0006	East-Asian	MamB
0.43614900786503	knocked down	1-0006	East-Asian	MamA
0.238468340025336	knocked down	1-0006	East-Asian	MamA
2.49196048445792	wild-type	1-0006	East-Asian	MamB
2.3532663453208	wild-type	1-0006	East-Asian	MamB
0.347723682396365	knocked down	1-0006	East-Asian	MamA
0.455807533635499	knocked down	1-0006	East-Asian	MamA
0.464459403888408	knocked down	1-0006	East-Asian	MamA
0.457975370318209	knocked down	1-0006	East-Asian	MamA
0.789403436946298	knocked down	1-0006	East-Asian	MamA
1.49908361607272	knocked down	1-0006	East-Asian	MamA
2.59626639138076	wild-type	1-0006	East-Asian	HsdM
3.25586080150041	wild-type	1-0006	East-Asian	HsdM
2.43614900786503	wild-type	1-0006	East-Asian	HsdM
2.99092501593404	wild-type	1-0006	East-Asian	HsdM
1.0159708234391	knocked down	1-0006	East-Asian	MamA
1.31819553249607	knocked down	1-0006	East-Asian	MamA
0.513225230883671	knocked down	1-0006	East-Asian	MamA
0.359367773377549	knocked down	1-0006	East-Asian	MamA
0.475201784428805	knocked down	1-0006	East-Asian	MamA
-0.071216159107279	knocked down	1-0006	East-Asian	MamA
1.07718743299228	knocked down	1-0006	East-Asian	MamA
1.43559909551193	knocked down	1-0006	East-Asian	MamA
0.075776484184568	knocked down	1-0006	East-Asian	MamA
0.598233256090159	knocked down	1-0006	East-Asian	MamA
-0.0433520840245167	knocked down	1-0006	East-Asian	MamA
-0.256067079567877	knocked down	1-0006	East-Asian	MamA
0.197538075970454	knocked down	1-0006	East-Asian	MamA
0.315806964001968	knocked down	1-0006	East-Asian	MamA
1.82469138695241	wild-type	1-0006	East-Asian	HsdM
2.94162171348383	wild-type	1-0006	East-Asian	HsdM
-0.0115099129830114	knocked down	1-0006	East-Asian	MamA
0.264711242788589	knocked down	1-0006	East-Asian	MamA
3.0183598483187	wild-type	1-0006	East-Asian	MamB
0.0658610153194851	knocked down	1-0006	East-Asian	MamA
1.02257691759069	knocked down	1-0006	East-Asian	MamA
-0.0464216490992789	knocked down	1-0006	East-Asian	MamA
0.291701222888853	knocked down	1-0006	East-Asian	MamA
0.441636633503461	knocked down	1-0006	East-Asian	MamA
0.928783840892721	knocked down	1-0006	East-Asian	MamA
[truncated: 498,609 more rows]
