# Supplementary material for: Drivers and sites of diversity in the DNA adenine methylomes of 93 Mycobacterium tuberculosis complex clinical isolates
Source: eLife. 2020 Oct 27;9:e58542. doi: 10.7554/eLife.58542 (PMC7591249; doi:10.7554/eLife.58542)
Supplement: Figure 3—source data 1. [file elife-58542-fig3-data1.csv]

strand	pos	mol	nat	N_nat	subread_len	gtype
0	1006	162589	2.208	6	17675	WT
1	73892	134589	2.69	6	16315	WT
0	107578	57986	1.844	6	10262	WT
0	110545	67042	1.798	10	26313	WT
0	111016	45522	2.022	6	20396	WT
0	118090	142095	2.939	6	15949	WT
0	118090	96560	1.246	6	11519	WT
1	140442	38290	2.628	6	18061	WT
0	163801	674	2.66	6	12922	WT
0	163801	22520	1.714	6	10226	WT
0	341517	28090	2.566	6	17769	WT
0	341517	133477	2.92	6	13017	WT
0	396850	142167	2.519	6	10018	WT
0	396850	136419	2.108	9	27872	WT
0	402130	89326	1.988	7	22097	WT
0	402130	129237	2.787	6	16533	WT
0	415002	112437	2.88	6	15751	WT
0	415002	72477	1.031	6	19013	WT
0	418402	131096	1.886	7	19130	WT
0	418402	85096	1.681	8	30592	WT
0	423122	79505	2.223	6	5424	WT
0	423122	9966	2.48	7	26444	WT
1	444359	129155	1.334	6	11587	WT
1	446545	155342	2.19	6	12333	WT
1	446545	5944	2.048	7	9704	WT
1	446545	145532	1.515	7	16236	WT
1	448966	27857	2.581	7	9663	WT
1	448966	102983	2.736	7	31219	WT
1	448966	77310	2.899	6	7241	WT
1	449743	35225	2.278	7	16138	WT
1	449743	30638	2.21	6	8201	WT
1	449743	117767	2.304	7	5427	WT
1	450720	17996	2.625	7	18773	WT
1	450720	139309	2.793	6	6748	WT
1	450720	33815	3.68	6	4984	WT
1	459430	157568	3.34	6	15789	WT
1	461190	33085	2.838	6	19317	WT
1	643109	141195	1.964	6	11004	WT
1	643109	135049	1.338	6	11332	WT
1	643109	60315	1.357	6	7079	WT
1	643255	87943	3.126	6	6503	WT
1	645065	98846	2.059	6	13051	WT
0	682389	30967	1.92	6	19391	WT
0	686640	104466	2.537	6	24227	WT
0	749156	90174	1.995	7	20770	WT
0	752612	151220	2.265	6	11560	WT
0	752612	28878	1.438	6	24804	WT
0	755220	115669	1.381	10	21917	WT
0	762564	111997	1.661	8	9668	WT
0	762564	58509	2.688	11	20505	WT
0	762564	97263	3.046	6	28158	WT
0	762564	19786	2.993	7	18511	WT
0	764069	134714	2.336	9	16684	WT
0	764069	148590	2.6	13	26450	WT
0	764069	47893	1.611	6	7792	WT
0	764069	29086	3.077	6	12376	WT
0	764653	116857	2.294	20	33333	WT
0	764653	107347	2.982	6	14031	WT
0	765899	79956	2.709	8	13214	WT
0	765899	42061	2.687	9	15667	WT
0	765899	86258	1.84	9	15065	WT
0	765899	103476	3.052	8	13874	WT
0	765899	149811	1.533	8	10653	WT
0	767142	4439	2.133	6	4230	WT
0	767766	134931	1.868	7	14732	WT
0	767766	151221	2.374	6	6232	WT
0	767766	147420	1.727	7	11366	WT
0	767766	96937	2.988	7	8807	WT
0	767766	24335	0.727	7	5730	WT
0	768147	138787	2.37	8	30200	WT
0	769821	30997	1.819	7	5670	WT
0	769821	49766	1.701	6	6981	WT
0	770312	92790	0.936	6	19067	WT
0	770468	114895	1.643	6	9674	WT
0	946451	11587	2.667	8	19969	WT
0	958866	61186	2.573	6	9818	WT
0	958866	106959	1.666	6	10888	WT
0	960494	56435	2.275	6	4713	WT
0	960494	136622	1.94	8	13309	WT
0	963220	27726	2.349	6	18474	WT
0	970855	5555	2.288	6	15787	WT
1	1009790	69195	2.422	7	28897	WT
1	1009790	33612	2.035	6	11609	WT
0	1045914	32093	2.192	11	31365	WT
0	1047982	141127	2.468	8	13318	WT
0	1051596	142056	1.681	11	31052	WT
0	1051596	130162	1.656	6	7232	WT
0	1053545	146153	2.14	6	14532	WT
0	1053545	100610	2.235	6	16417	WT
0	1053545	129800	1.08	6	13316	WT
0	1077730	87861	2.769	6	29337	WT
0	1143969	145149	1.809	6	8675	WT
0	1143969	118641	1.69	6	14022	WT
0	1143969	135392	1.227	7	10551	WT
0	1145962	162574	2.109	7	16185	WT
0	1145962	39266	1.657	10	16135	WT
0	1145962	87450	1.542	6	7841	WT
0	1147706	139590	1.959	9	10808	WT
0	1147706	115613	2.299	9	23805	WT
0	1147706	149044	1.562	8	7958	WT
0	1147706	87533	1.288	8	10260	WT
0	1149143	120285	1.499	7	11638	WT
0	1149143	13723	2.604	7	7483	WT
0	1245999	17202	2.658	6	9960	WT
1	1259847	50524	2.709	7	29376	WT
1	1390345	84680	2.169	6	14834	WT
1	1396350	125322	2.331	6	6246	WT
1	1396350	38611	2.538	6	4946	WT
1	1396350	14566	2.074	7	8777	WT
1	1396350	152774	2.565	6	11061	WT
1	1396350	106693	2.584	7	7142	WT
1	1396350	73397	2.009	6	5105	WT
1	1397020	58284	2.841	6	23391	WT
1	1630426	18912	2.631	6	18284	WT
1	1630426	133173	2.872	6	9011	WT
0	1655466	153120	1.632	7	23610	WT
0	1655466	48947	1.455	6	9717	WT
0	1655466	135683	1.447	7	31294	WT
0	1655466	72498	0.711	6	18665	WT
0	1655466	35512	2.866	7	19024	WT
0	1655522	148748	1.532	6	7981	WT
0	1655522	147321	2.267	6	11188	WT
0	1657541	88754	2.339	6	7957	WT
0	1669012	112871	0.081	6	21180	WT
0	1674682	82320	2.983	6	16793	WT
0	1675976	80219	2.28	6	17345	WT
0	1679595	138222	1.238	9	27562	WT
0	1842744	26141	3.044	7	27967	WT
0	1880889	19616	1.89	9	10691	WT
0	1914697	159455	2.879	11	25523	WT
0	1925165	140200	2.412	6	12263	WT
0	2065278	136175	2.625	6	8621	WT
0	2066627	133687	1.704	6	19234	WT
0	2185580	49456	2.144	6	12334	WT
0	2185580	150926	2.155	9	24607	WT
0	2189287	162419	2.328	7	8210	WT
0	2189287	49454	2.183	12	24221	WT
0	2189287	160740	2.11	9	9292	WT
0	2189287	70551	2.039	7	8339	WT
0	2189287	54709	2.037	8	8721	WT
0	2189287	64664	2.543	7	12258	WT
0	2189287	41763	2.649	8	29751	WT
0	2189287	81635	2.739	6	8626	WT
0	2189287	4731	1.593	9	9308	WT
0	2189287	15813	1.197	7	7031	WT
0	2190792	118211	2.709	8	27508	WT
0	2191167	106167	2.199	8	33220	WT
0	2191167	80181	2.223	6	13431	WT
0	2191167	136051	2.199	7	6434	WT
0	2191167	5019	2.156	6	11854	WT
0	2191167	11967	2.2	6	7406	WT
0	2191167	688	2.424	6	9845	WT
0	2191167	15991	1.799	7	7399	WT
0	2191167	72905	2.896	6	8688	WT
0	2191167	160771	1.692	6	28152	WT
0	2191935	104974	2.561	6	4877	WT
1	2303490	124645	3.312	6	12914	WT
1	2331715	127399	2.377	6	18397	WT
0	2435360	156812	1.918	7	12371	WT
1	2508340	58291	2.322	7	12542	WT
1	2508340	99072	2.924	6	21325	WT
0	2516888	53778	3.157	6	9901	WT
1	2654294	91190	2.947	7	18468	WT
1	2654294	147385	0.612	6	11957	WT
1	2726717	155640	1.434	6	11746	WT
1	2729700	159414	2.169	6	25223	WT
1	2749778	15546	1.568	6	11103	WT
1	2787845	115831	2.087	8	18198	WT
1	2787845	71386	2.063	10	29722	WT
1	2787845	24315	1.885	7	14603	WT
1	2787845	44418	3.088	9	27863	WT
1	2787845	156994	3.276	6	31857	WT
1	2788169	8815	2.398	8	23744	WT
1	2788169	153799	2.453	7	8909	WT
1	2789484	102693	2.195	6	11424	WT
1	2789484	43622	2.341	6	5795	WT
1	2815705	49302	1.642	6	13788	WT
1	2843117	91952	2.617	7	12483	WT
1	2843117	84497	0.44	6	12326	WT
1	2845031	148527	2.052	6	23731	WT
1	2845031	82131	1.747	6	18046	WT
1	2845031	19270	2.713	6	9732	WT
0	2883768	107915	2.394	8	25546	WT
0	2887007	145527	2.384	6	17952	WT
0	2889047	131156	2.523	7	8739	WT
1	2915253	37906	2.579	7	18521	WT
1	2940845	109223	0.842	6	28679	WT
1	2943489	45504	1.099	6	18991	WT
1	3039052	135343	2.364	9	24042	WT
1	3039052	157672	2.615	6	13774	WT
1	3039052	81872	2.984	6	12075	WT
1	3040821	89957	2.309	8	18968	WT
1	3040821	78427	1.961	7	8866	WT
1	3041466	20118	2.574	6	17128	WT
1	3041466	111865	1.566	7	25004	WT
1	3047829	25642	2.416	6	6731	WT
1	3047829	143322	2.594	6	23554	WT
1	3074209	27537	1.965	6	30402	WT
1	3111146	21127	2.908	6	23755	WT
1	3169479	149397	2.076	6	12027	WT
1	3169479	130167	2.45	7	30884	WT
1	3169479	49144	2.646	6	14312	WT
1	3189427	115032	1.929	6	22385	WT
1	3208577	123998	1.96	6	26499	WT
1	3218422	26499	1.308	6	10667	WT
1	3223724	3463	2.558	6	11189	WT
0	3447919	141293	2.222	6	33998	WT
0	3451072	95823	2.999	6	11388	WT
0	3506439	3831	2.602	9	20482	WT
0	3506439	8595	2.667	6	22532	WT
0	3506439	141004	2.814	7	8349	WT
0	3507168	152160	1.602	7	11290	WT
0	3508305	103914	2.146	7	11264	WT
0	3511117	20449	2.288	7	18463	WT
0	3511117	40304	2.434	7	8715	WT
0	3511117	140225	2.515	6	11841	WT
0	3511117	104018	2.129	7	23404	WT
0	3512796	35801	2.319	8	9091	WT
0	3512796	48097	2.142	7	11902	WT
0	3514061	69436	2.564	7	27492	WT
1	3605968	1828	2.282	6	26995	WT
1	3605968	51127	2.735	6	22813	WT
1	3608395	16017	2.069	6	7496	WT
1	3608395	89947	1.048	6	15071	WT
1	3619554	153390	2.097	7	13418	WT
1	3624151	160374	2.268	7	8391	WT
1	3624151	137701	2.339	12	27818	WT
1	3624151	158392	2.041	6	16722	WT
1	3624151	119923	2.746	6	13777	WT
1	3624151	104641	2.907	6	14903	WT
1	3625664	153709	2.152	6	12799	WT
1	3698615	146724	1.397	6	13972	WT
1	3832772	19499	2.135	8	14809	WT
1	3832772	138028	2.952	6	22763	WT
1	3837658	120808	2.445	6	11888	WT
1	3837966	121925	2.303	8	21413	WT
1	3837966	106620	1.642	7	16537	WT
0	3959921	10701	2.048	6	16860	WT
0	3968757	97196	2.09	7	14938	WT
1	3991752	32278	2.447	6	24182	WT
1	3991752	135069	2.094	7	21629	WT
1	3991752	159968	1.965	7	8514	WT
1	3991752	43966	2.984	6	17771	WT
1	3991752	132203	1.204	6	10364	WT
1	4035683	73152	2.543	6	9985	WT
1	4035683	49357	2.064	7	23429	WT
1	4035683	87126	2.392	6	9752	WT
1	4035683	149710	3.02	7	9480	WT
1	4035683	109269	1.282	6	14005	WT
1	4037191	14609	2.262	6	12599	WT
1	4037191	127377	2.4	9	15656	WT
1	4037191	95271	2.164	6	14923	WT
1	4037191	28177	2.696	6	11095	WT
1	4037191	123855	2.666	9	13523	WT
1	4038683	71752	1.362	7	10087	WT
1	4040538	129294	1.232	6	10247	WT
1	4055014	131257	2.572	6	9439	WT
0	4161339	146481	2.216	7	8594	WT
0	4161339	61573	2.122	6	14559	WT
0	4161339	138881	2.331	6	28544	WT
0	4161339	148913	2.024	6	8092	WT
0	4161339	104766	1.906	6	9670	WT
0	4161339	156930	2.004	6	17361	WT
0	4161339	63850	2.611	6	6932	WT
0	4161339	153030	2.79	7	29058	WT
0	4161468	4700	1.304	6	7716	WT
0	4172659	146739	1.674	7	9688	WT
0	4172659	88817	1.602	6	4160	WT
0	4172659	121570	2.439	14	19570	WT
1	4296339	52144	2.263	9	30342	WT
1	4296339	31520	1.893	7	14054	WT
1	4302180	99437	2.05	6	15261	WT
1	4302180	131515	1.58	10	30028	WT
1	4302432	78540	2.211	6	12826	WT
1	4302432	6198	2.421	6	9043	WT
0	4331973	119018	2.056	6	26827	WT
0	4337980	157682	2.613	6	24620	WT
0	110674	64122	1.903	9	30245	WT
1	140571	18914	0.11	6	17737	WT
0	345719	56836	2.983	7	24071	WT
0	389621	42956	1.792	7	15987	WT
0	393000	79022	2.419	7	17309	WT
0	393000	82783	2.75	6	10946	WT
0	398280	65372	1.521	6	9411	WT
0	419271	67214	1.932	9	25475	WT
0	419271	159688	2.085	6	6892	WT
0	419271	80298	2.142	7	8313	WT
0	419271	98059	2.131	11	33583	WT
0	419271	16399	-1.265	6	6865	WT
0	419413	29056	2.077	6	18346	WT
1	437065	98684	2.581	12	34084	WT
1	440508	80841	1.479	7	24671	WT
1	442694	36798	1.939	16	30476	WT
1	442694	138181	1.499	6	10234	WT
1	442694	154745	2.753	6	11074	WT
1	442694	104095	2.936	6	8538	WT
1	445115	141609	1.938	11	28741	WT
1	445892	44053	2.51	8	28737	WT
1	445892	36596	2.712	6	11855	WT
1	445892	148518	2.917	7	8377	WT
1	446869	108138	2.492	10	27298	WT
1	446869	31500	2.615	6	9852	WT
1	447908	19687	2.124	6	20346	WT
1	447908	86827	1.021	6	7526	WT
1	452174	27803	2.32	6	28942	WT
1	455578	83179	2.459	7	30166	WT
1	455578	92118	2.614	6	9342	WT
0	523268	107622	2.312	6	17520	WT
0	561278	9586	1.671	8	18826	WT
1	561484	128266	2.919	6	30089	WT
1	639247	73618	2.513	15	36937	WT
1	639247	152535	2.525	8	12006	WT
1	639247	20743	2.92	7	10678	WT
1	641203	45984	2.665	7	19614	WT
0	656888	63341	2.536	6	14956	WT
0	656888	19862	0.661	6	20496	WT
0	745284	88058	2.014	8	24433	WT
0	748740	108295	2.221	6	12982	WT
0	748974	60342	1.893	6	32124	WT
0	758691	93492	2.21	6	14667	WT
0	758691	87550	1.93	6	13170	WT
0	758691	116059	2.18	13	20689	WT
0	758691	141781	2.251	11	21051	WT
0	758691	90901	2.51	8	8719	WT
0	760196	131328	2.315	9	13183	WT
0	760196	55080	3.067	11	17825	WT
0	760780	86207	1.69	7	19093	WT
0	762026	164063	1.976	6	9628	WT
0	763269	110407	1.734	6	9260	WT
0	763269	53956	1.816	6	8913	WT
0	763269	60673	1.756	7	5911	WT
0	763269	136668	1.584	7	12106	WT
0	763269	126287	3.05	7	8544	WT
0	763893	60666	1.803	11	22922	WT
0	764274	77797	1.775	6	11879	WT
0	765948	51105	1.96	6	16774	WT
0	765948	159057	1.691	6	12872	WT
0	765948	45334	2.415	6	3884	WT
0	765948	177944	0.765	6	7230	WT
0	766439	62697	1.956	6	16099	WT
0	766595	61031	1.782	10	33213	WT
0	898812	75275	2.7	6	30461	WT
0	948718	153956	1.369	9	22918	WT
0	956707	136734	2.288	6	17201	WT
0	956707	90495	2.815	8	24394	WT
0	958593	166273	2.447	13	33325	WT
0	1041586	138695	2.054	9	22429	WT
0	1044304	10372	1.621	8	15441	WT
0	1047260	152496	1.995	9	31651	WT
0	1073394	99971	2.101	6	18986	WT
0	1139633	66181	2.113	10	18020	WT
0	1141456	13742	2.405	15	34258	WT
0	1141456	79086	0.955	13	33672	WT
0	1141626	88810	1.471	6	5519	WT
0	1141626	79290	2.015	7	12081	WT
0	1143370	149133	1.495	13	32615	WT
0	1143370	150542	2.63	9	18901	WT
0	1143370	143563	2.674	6	15179	WT
0	1143637	133308	1.608	6	8344	WT
0	1143637	74239	1.714	9	30516	WT
0	1143637	110666	1.635	17	33262	WT
0	1144807	121524	2.035	7	12602	WT
0	1144807	82271	1.519	9	17311	WT
0	1144807	99836	2.555	6	13741	WT
0	1144807	33088	0.923	6	11632	WT
0	1145769	70147	2.194	14	33951	WT
0	1148989	118724	1.837	8	30803	WT
1	1392014	52319	1.997	7	25042	WT
1	1392014	54156	2.674	11	33077	WT
1	1392014	132799	2.757	7	11278	WT
1	1392684	117564	1.226	6	8706	WT
0	1600409	24394	2.184	6	13415	WT
0	1651043	27137	1.738	8	31209	WT
0	1651043	51052	1.081	6	10046	WT
0	1651043	62222	-0.037	10	20339	WT
0	1651043	132485	-0.588	6	20845	WT
0	1670259	95218	2.694	14	35317	WT
0	1670259	117835	3.247	6	7658	WT
0	1672691	131413	1.608	7	9943	WT
0	1689354	33131	1.583	6	16240	WT
0	1689354	35904	1.242	6	32701	WT
0	1707501	152040	2.835	6	22278	WT
0	1823781	33606	2.892	7	17846	WT
0	1875049	97474	2.632	6	8980	WT
0	1875049	99246	2.457	7	28248	WT
0	1875049	118527	2.307	9	25444	WT
0	1875049	164156	2.657	9	34617	WT
0	1875049	77921	1.97	9	30324	WT
0	1875049	157474	1.381	7	4014	WT
0	1877645	99806	1.817	6	18589	WT
1	1897835	58312	0.352	6	25038	WT
0	1941963	120295	1.394	6	27557	WT
0	2068831	38324	2.307	7	15343	WT
0	2125943	118646	1.736	6	15158	WT
0	2192477	60933	2.003	9	8552	WT
0	2192477	68577	2.467	7	7052	WT
0	2192477	134946	1.724	8	6937	WT
0	2192477	125431	1.543	9	19941	WT
0	2193982	136815	2.178	6	4986	WT
0	2193982	37945	2.015	23	32947	WT
0	2193982	111782	2.56	16	25695	WT
0	2193982	68963	1.433	6	11270	WT
0	2194357	37568	3.684	6	5538	WT
0	2194453	150600	2.307	6	7522	WT
1	2361231	58151	1.968	6	10737	WT
0	2441458	77451	2.806	7	12287	WT
1	2459412	38648	1.574	6	21802	WT
0	2497111	106301	2.166	9	34436	WT
0	2497111	148924	2.344	6	12056	WT
1	2514438	136744	2.32	6	24232	WT
1	2755870	82765	2.151	7	33038	WT
1	2755870	116819	1.377	7	30004	WT
1	2763982	143593	2.326	6	14439	WT
1	2793936	111942	1.712	6	11456	WT
1	2793936	98116	1.356	7	10741	WT
1	2793936	141584	0.486	6	13762	WT
1	2794260	108475	1.225	6	15540	WT
1	2794260	91926	2.617	8	13014	WT
1	2814081	95112	1.744	6	27995	WT
1	2819713	9900	1.344	6	13862	WT
1	2842355	70740	2.176	6	11444	WT
1	2849208	126362	2.206	8	8275	WT
1	2849208	158052	2.495	7	17711	WT
1	2852649	61877	2.742	6	6079	WT
0	2895138	25151	2.375	6	8101	WT
1	2949580	53896	1.81	8	26075	WT
1	3045148	53128	2.553	10	28922	WT
1	3045148	124777	2.048	10	23629	WT
1	3045148	140038	2.141	10	26105	WT
1	3045148	94739	1.754	7	16499	WT
1	3046917	75293	2.198	6	10630	WT
1	3046917	8984	2.82	8	23998	WT
1	3046917	167905	3.5	7	9451	WT
1	3053925	125421	1.646	7	37348	WT
1	3081210	13634	2.276	7	16321	WT
1	3087635	51545	2.572	10	34387	WT
1	3118599	131086	1.298	10	30175	WT
1	3198122	62576	2.317	12	33723	WT
1	3200168	16747	2.464	6	32363	WT
1	3226959	20215	2.956	7	17777	WT
1	3232261	132723	2.223	6	12031	WT
1	3405679	64945	2.08	6	25403	WT
1	3405679	166591	1.805	6	10148	WT
1	3409896	92756	1.971	9	18659	WT
1	3453078	128294	1.887	6	15617	WT
0	3459732	108040	1.884	6	19643	WT
0	3463350	129191	2.625	6	35100	WT
0	3485358	136175	2.274	7	10906	WT
0	3518252	90184	2.124	7	8731	WT
0	3518252	84238	2.436	8	28932	WT
0	3518252	142378	2.617	6	24657	WT
0	3518981	115236	2.473	6	17636	WT
0	3519221	97714	2.735	6	9768	WT
0	3522930	69874	2.072	8	27243	WT
0	3522930	122879	2.778	7	17885	WT
0	3524609	107355	2.054	7	7313	WT
0	3524609	33380	2.448	6	10736	WT
0	3524609	150180	1.332	6	12113	WT
0	3525874	21663	2.566	13	36290	WT
1	3619252	47129	1.986	8	25622	WT
1	3619252	84118	1.861	10	32777	WT
1	3619252	125271	2.774	10	31487	WT
1	3619286	116379	2.419	11	35048	WT
1	3621679	34906	1.674	14	35608	WT
1	3626430	34833	2.387	6	34406	WT
1	3632838	42126	1.489	6	9270	WT
1	3637435	107268	1.961	9	20620	WT
1	3637435	53602	1.682	8	18255	WT
1	3637435	94528	2.423	7	7095	WT
1	3637630	27932	0.882	6	10146	WT
1	3638948	112071	1.84	11	27426	WT
1	3642331	73758	2.202	6	34376	WT
1	3642331	13545	1.409	7	10779	WT
1	3711899	114830	3.039	6	12930	WT
1	3713091	141030	3.494	6	25465	WT
1	3848416	18757	1.534	9	15756	WT
1	3853610	57120	2.51	9	34575	WT
0	4002308	68627	2.258	6	27150	WT
1	4010055	117059	2.321	6	6756	WT
1	4010055	67968	2.347	12	26374	WT
1	4010055	89858	1.835	6	10287	WT
1	4010055	50752	2.526	9	27681	WT
1	4010055	126967	2.637	6	7264	WT
1	4010983	46801	1.824	6	6795	WT
0	4030993	31280	1.976	6	26877	WT
1	4053989	77374	1.874	8	21701	WT
1	4055497	131210	2.237	14	32094	WT
1	4055497	134695	2.377	10	22879	WT
1	4056989	113882	2.756	9	34531	WT
1	4056989	41360	0.196	7	18981	WT
1	4057117	121766	1.299	7	16607	WT
1	4059177	91977	0.948	7	17756	WT
0	4180824	60885	1.816	6	8433	WT
0	4180824	10158	2.004	8	19778	WT
0	4180824	135875	1.6	10	34812	WT
0	4180824	53829	2.293	17	32944	WT
0	4180824	91572	2.34	6	11060	WT
0	4180824	28706	2.411	14	32839	WT
0	4180824	126946	0.435	6	6373	WT
0	4180953	61308	1.307	6	19419	WT
0	4192144	98701	2.164	6	10266	WT
0	4192144	149042	2.744	7	16297	WT
0	4192144	5751	-0.477	10	18268	WT
1	4315823	37288	2.822	6	16581	WT
1	4316150	6835	2.397	7	15282	WT
1	4321664	156135	2.026	6	5964	WT
0	115251	146608	2.234	7	31654	WT
0	115251	36514	2.862	6	28034	WT
0	115251	102232	1.039	6	19020	WT
0	118218	129673	1.108	6	17772	WT
0	353011	107969	2.094	9	28863	WT
0	353011	59273	2.241	6	15829	WT
0	353011	12769	2.706	9	28383	WT
0	354888	22191	2.718	8	21456	WT
0	400987	116590	1.699	6	14184	WT
0	404366	129280	2.021	7	9513	WT
0	409646	137062	1.896	10	25315	WT
0	409646	1800	2.741	8	30249	WT
0	425917	47856	2.168	11	27176	WT
0	430637	67733	2.038	7	14896	WT
0	430637	92018	2.652	6	6051	WT
0	430637	96121	3.186	7	17273	WT
0	430637	154066	3.641	7	19940	WT
1	444042	27602	2.764	6	28682	WT
1	451712	47405	1.437	7	19342	WT
1	453898	28618	2.294	10	23115	WT
1	453898	128124	2.175	6	13569	WT
1	453898	123947	2.799	6	7703	WT
1	456319	158890	2.467	11	28647	WT
1	456319	15241	1.334	12	23880	WT
1	457096	154264	2.272	6	8815	WT
1	458073	162764	2.006	7	24233	WT
1	458073	128501	2.776	9	18121	WT
1	458073	50511	1.789	6	19630	WT
1	458073	61171	1.252	10	27319	WT
1	459112	101729	2.757	7	11247	WT
1	466783	27061	2.695	7	10896	WT
1	466783	127727	1.643	6	13681	WT
0	572694	72340	2.348	7	19052	WT
1	644227	39256	0.777	6	26740	WT
1	649803	112945	2.259	7	15836	WT
1	649803	105704	2.283	10	28373	WT
1	649803	21309	2.292	6	19845	WT
1	649803	65954	2.456	6	29256	WT
1	649803	99720	2.43	7	10712	WT
1	649803	77079	1.75	7	13171	WT
1	649803	123139	3.107	7	4013	WT
1	649949	1213	2.698	6	17856	WT
1	651759	153514	1.98	9	21395	WT
1	651759	137668	2.665	7	21463	WT
0	753451	94219	2.136	7	16654	WT
0	755877	115060	1.026	8	13119	WT
0	759333	12772	2.194	10	24281	WT
0	759333	124740	2.217	7	22084	WT
0	765978	36763	0.96	6	10229	WT
0	769284	147393	2.915	11	32401	WT
0	769284	96634	3.139	8	32230	WT
0	770789	28908	2.474	16	33401	WT
0	770789	145434	3.019	8	9745	WT
0	771373	813	2.15	14	24363	WT
0	771373	99568	1.389	7	24125	WT
0	772619	31116	1.92	6	13921	WT
0	773862	73142	2.457	11	29987	WT
0	773862	135593	1.501	8	15217	WT
0	774486	113894	2.427	9	24779	WT
0	774486	27901	2.404	8	13973	WT
0	774486	120900	1.82	12	26639	WT
0	774486	115854	3.626	7	22487	WT
0	774867	9812	2.367	9	29944	WT
0	774867	16878	1.919	10	23012	WT
0	774867	28271	1.684	9	30278	WT
0	776541	51267	2.563	6	27058	WT
0	776541	143773	2.014	31	26153	WT
0	776541	159430	1.803	8	16959	WT
0	776541	18778	1.551	22	29225	WT
1	922566	78070	2.531	6	22569	WT
0	963959	32754	1.796	13	26362	WT
0	963959	155832	1.376	7	15666	WT
0	965090	25446	1.885	6	11303	WT
0	965586	41492	1.977	9	27332	WT
1	1014849	13760	2.484	10	27866	WT
0	1053698	119984	1.618	8	29131	WT
0	1061077	94400	2.18	8	16488	WT
0	1082788	54770	1.588	10	31405	WT
0	1149039	121117	1.935	7	31806	WT
0	1149039	148907	0.748	6	10749	WT
0	1150862	82836	1.857	7	8474	WT
0	1150862	12588	2.137	9	11639	WT
0	1150862	13535	2.2	14	24782	WT
0	1150862	138844	2.288	8	21343	WT
0	1150862	3527	1.438	6	19980	WT
0	1150862	160909	2.427	13	32119	WT
0	1151032	103535	1.808	7	15661	WT
0	1151032	42823	1.488	6	13859	WT
0	1151032	27275	1.407	6	8257	WT
0	1151032	162191	2.6	7	25577	WT
0	1152776	159520	2.124	13	26310	WT
0	1152776	78401	2.177	7	13311	WT
0	1152776	1404	1.737	7	6632	WT
0	1153043	163372	1.914	9	24352	WT
0	1247563	3517	1.815	6	26953	WT
1	1399561	74361	2.304	6	5554	WT
1	1399561	132072	2.407	6	11161	WT
1	1399561	8005	2.637	12	22103	WT
1	1399561	58843	2.936	7	11295	WT
1	1399561	18850	0.903	6	15344	WT
1	1400231	14403	1.9	9	23748	WT
1	1400231	99106	1.331	8	23437	WT
1	1636338	39025	2.642	7	18376	WT
1	1636338	80764	2.749	6	7479	WT
1	1636338	10861	3.605	7	23379	WT
0	1661226	94520	1.449	6	7632	WT
0	1661226	102277	2.183	6	8040	WT
0	1661226	114901	2.125	6	14547	WT
0	1663301	59707	2.024	10	27042	WT
0	1663301	32437	2.688	6	10811	WT
0	1681736	81817	2.312	6	13791	WT
0	1685355	134293	2.128	8	23815	WT
0	1699537	58732	2.517	6	26435	WT
0	1875427	55179	2.611	10	15713	WT
0	1875427	118185	2.702	6	18223	WT
0	1875427	63346	2.295	9	27644	WT
0	1876832	1381	2.448	7	8959	WT
0	1876832	30564	2.154	6	3514	WT
0	1876832	144505	1.967	6	11092	WT
0	1876832	125853	1.653	10	27079	WT
0	1876832	94678	1.307	6	7309	WT
0	2078019	155966	2.81	6	16781	WT
0	2200859	125592	0.939	6	9604	WT
0	2202364	101273	2.205	6	7503	WT
0	2202364	33808	2.539	7	6516	WT
0	2202364	39874	2.727	8	4439	WT
0	2202364	39829	3.469	7	8068	WT
0	2202739	118466	3.06	6	13115	WT
1	2347576	118605	2.076	7	27715	WT
1	2395341	35073	1.343	6	21631	WT
1	2395908	17820	2.952	6	22653	WT
0	2504140	55154	1.233	8	32617	WT
1	2741390	34846	2.388	6	8404	WT
1	2741390	152828	2.551	6	8932	WT
1	2802518	97800	2.145	7	26235	WT
1	2802518	113713	2.348	6	5235	WT
1	2830598	159377	2.105	6	31669	WT
1	2860079	96496	1.601	8	20726	WT
1	2861102	153906	2.265	12	29383	WT
1	2862629	162505	2.541	7	23516	WT
1	2862629	71378	1.004	9	29530	WT
0	2903734	61876	2.162	6	9998	WT
0	2903734	52024	2.109	7	13020	WT
0	2903734	120434	1.039	6	16709	WT
0	2903779	88254	2.309	6	22905	WT
1	2943780	160689	2.406	6	16480	WT
1	2943780	114469	2.246	6	18530	WT
1	2960154	2270	2.551	9	19998	WT
1	3045841	104271	2.683	7	12310	WT
1	3045841	112147	1.652	6	23545	WT
1	3047610	136614	2.82	7	13387	WT
1	3047610	126216	2.772	8	27951	WT
1	3047610	39990	2.801	11	22066	WT
1	3047610	13	2.962	7	13808	WT
1	3199947	70709	2.221	6	21020	WT
1	3199947	47063	3.06	9	27155	WT
1	3201993	18309	2.185	7	20134	WT
1	3201993	26705	0.98	7	25677	WT
1	3204065	45603	3.26	6	20028	WT
1	3413855	6070	2.863	6	23921	WT
1	3413855	71186	1.582	6	19595	WT
0	3464440	39326	2.008	6	16121	WT
0	3519439	9306	2.151	9	15834	WT
0	3519439	158594	2.457	11	32030	WT
0	3519439	43430	1.914	7	19524	WT
0	3519886	124882	1.831	7	13034	WT
0	3520168	4984	2.333	7	16674	WT
0	3520168	103496	2.579	7	23980	WT
0	3525798	157591	2.031	8	28842	WT
1	3619035	77234	2.417	6	8562	WT
1	3619035	25547	2.986	6	14007	WT
1	3621462	63806	2.118	6	23625	WT
1	3621462	123028	1.611	6	7324	WT
1	3637214	154871	1.999	7	29195	WT
1	3637214	35845	1.544	8	11793	WT
1	3637409	38664	2.387	13	29627	WT
1	3637697	11561	2.348	6	15863	WT
1	3852345	55325	2.321	7	9816	WT
1	3852609	33654	2.732	9	28575	WT
0	3987478	98526	2.4	6	21641	WT
1	4010473	139926	2.342	12	28641	WT
1	4010473	67	2.189	7	23536	WT
1	4010473	9481	2.732	9	29557	WT
1	4010473	137338	3.259	9	32266	WT
1	4011401	78421	1.701	6	26775	WT
1	4054418	92801	1.589	8	14257	WT
1	4055953	51027	2.281	7	14165	WT
1	4055953	38156	2.341	6	4336	WT
1	4055953	15324	1.462	7	15545	WT
1	4057445	64133	1.559	10	32805	WT
1	4057445	48721	1.107	6	12615	WT
1	4057573	104973	1.791	6	6675	WT
1	4057573	138357	2.743	11	31610	WT
1	4057573	34884	2.957	6	7457	WT
1	4059300	156116	2.268	8	25472	WT
1	4059300	151699	1.203	6	11853	WT
0	4180275	42065	2.308	7	28420	WT
0	4180275	59575	2.394	10	25049	WT
0	4180275	107393	3.209	6	3816	WT
0	4180275	108802	0.716	9	18866	WT
0	4180404	30288	0.583	7	20177	WT
0	4191594	55200	1.718	10	26108	WT
0	4191594	162177	1.619	6	8553	WT
1	4288621	7491	1.931	6	17672	WT
1	4322303	153426	2.356	6	21804	WT
1	4322303	143737	2.209	9	24670	WT
1	4322303	100678	2.146	7	11217	WT
1	4322303	124411	2.804	7	21909	WT
1	4322303	27260	1.904	9	24825	WT
1	4322555	147920	2.047	6	7384	WT
1	72308	26805	1.057	6	16975	WT
0	108968	40494	2.348	6	24597	WT
0	164528	74891	2.185	6	21767	WT
0	252520	118422	1.095	6	25986	WT
0	344075	74062	2.034	6	17696	WT
0	345952	41840	2.455	9	31241	WT
0	387849	116255	2.586	6	30261	WT
0	391950	127714	2.265	8	30193	WT
0	392079	88820	0.867	6	14162	WT
0	395329	34038	2.915	6	14690	WT
0	400609	139060	2.284	6	9481	WT
0	400609	126636	2.339	9	23734	WT
0	400609	121469	2.353	13	31294	WT
0	400609	88107	1.928	6	20669	WT
0	400609	18590	1.493	8	21421	WT
0	416881	151496	2.314	6	8966	WT
0	416881	81860	2.475	7	21562	WT
0	416881	136014	2.663	8	27672	WT
0	416881	99736	2.669	6	19192	WT
0	421601	110713	2.196	6	11728	WT
0	421601	23198	1.649	10	27374	WT
0	421601	117153	2.936	7	25396	WT
0	421601	47486	3.045	10	32421	WT
0	421743	49721	1.175	6	14981	WT
1	434926	113167	1.865	8	19764	WT
1	434926	107228	1.116	11	22496	WT
1	442595	1973	-0.05	7	10899	WT
1	444781	114928	2.177	10	26418	WT
1	444781	120675	2.055	7	7780	WT
1	444781	144974	1.722	6	17610	WT
1	444781	33051	1.195	10	31435	WT
1	444781	149166	1.002	7	16699	WT
1	447202	122922	2.129	6	11643	WT
1	447202	75905	2.119	18	29165	WT
1	447202	117591	2.055	8	10897	WT
1	447202	87979	2.556	8	26228	WT
1	447202	81805	1.66	10	26948	WT
1	447202	103889	1.46	11	25518	WT
1	447202	89100	2.864	7	7790	WT
1	447979	143477	2.278	6	6931	WT
1	447979	153011	2.339	7	17932	WT
1	447979	56456	2.439	10	29085	WT
1	447979	17020	2.499	6	8370	WT
1	447979	151069	1.671	6	7062	WT
1	448956	98738	2.53	8	12559	WT
1	449995	30906	2.713	6	19143	WT
1	457666	92724	2.53	6	14226	WT
1	457666	71093	2.608	8	23160	WT
1	558619	91131	2.354	7	25132	WT
1	634486	19570	1.995	6	15440	WT
1	640062	132997	2.361	11	20989	WT
1	640062	127988	2.118	13	29596	WT
1	640062	97234	2.403	7	22926	WT
1	640062	93589	1.907	6	11519	WT
1	640062	28455	2.64	8	28118	WT
1	640062	122541	2.549	6	10028	WT
1	640062	117015	2.749	10	32095	WT
1	640062	142782	1.442	11	25228	WT
1	640208	115504	1.373	6	15318	WT
1	642018	26311	1.841	13	30142	WT
1	642018	145422	3.116	9	30752	WT
1	642018	130206	0.973	9	24898	WT
1	642018	21755	3.568	10	25219	WT
1	642221	120450	2.376	6	21933	WT
0	746127	22719	2.784	7	25534	WT
0	749583	134397	1.9	13	30969	WT
0	749583	120865	2.3	9	25413	WT
0	749583	68119	1.706	6	9327	WT
0	749583	129108	2.882	11	30174	WT
0	756229	111420	2.815	6	15996	WT
0	759535	17683	2.21	7	18330	WT
0	759535	98400	2.147	10	23435	WT
0	759535	132977	2.092	7	16479	WT
0	759535	69209	1.691	9	12562	WT
0	759535	53697	2.652	9	24418	WT
0	759535	740	2.799	7	19493	WT
0	761040	25333	2.225	10	15882	WT
0	761040	155490	2.428	7	7732	WT
0	761040	43383	1.775	13	23454	WT
0	761040	76144	2.582	14	22140	WT
0	761040	12455	1.656	6	7431	WT
0	761040	147059	2.785	14	26672	WT
0	761040	100013	1.484	10	23222	WT
0	761624	91098	2.185	6	7670	WT
0	761624	19893	2.369	8	11557	WT
0	761624	12930	2.388	7	18446	WT
0	761624	96161	2.881	9	20371	WT
0	762870	108168	2.816	10	17803	WT
0	762870	163068	2.856	6	22624	WT
0	762870	10065	1.716	7	17403	WT
0	764113	142405	2.062	17	27200	WT
0	764113	31849	2.101	7	17360	WT
0	764113	136580	2.075	7	26249	WT
0	764113	23302	1.924	7	10218	WT
0	764113	105635	1.765	7	14234	WT
0	764113	141745	2.506	9	11581	WT
0	764113	50355	1.588	9	13650	WT
0	764113	48425	2.691	7	4457	WT
0	764113	81029	2.937	6	9464	WT
0	764113	45365	3.143	7	10714	WT
0	764113	32000	3.178	6	8206	WT
0	764737	57648	2.194	7	10888	WT
0	764737	3625	2.089	6	14343	WT
0	764737	12150	2.53	6	30977	WT
0	764737	24258	2.598	13	36709	WT
0	765118	85698	2.21	17	27992	WT
0	765118	18261	1.525	10	16846	WT
0	766792	88245	2.063	11	22656	WT
0	766792	10708	1.859	21	27386	WT
0	766792	136099	1.813	6	11258	WT
0	766792	82362	2.812	8	19999	WT
0	766792	73551	2.853	7	21092	WT
0	767283	758	2.43	6	15079	WT
0	825233	10895	2.059	6	13873	WT
0	954070	4215	2.319	7	21112	WT
0	954070	142670	2.448	7	15223	WT
0	954070	132307	1.869	8	30618	WT
1	1004951	24930	1.921	8	23115	WT
0	1043800	28644	2.155	9	26231	WT
0	1046756	115417	2.095	9	26477	WT
0	1046756	31650	1.568	6	9295	WT
0	1046756	53249	-0.144	6	7419	WT
0	1063711	132579	2.893	6	26487	WT
0	1139075	119337	2.105	11	28311	WT
0	1139075	32694	1.843	9	25056	WT
0	1139075	3252	1.893	7	9710	WT
0	1139075	38282	2.209	8	26569	WT
0	1139075	163139	2.407	7	10698	WT
0	1139075	18872	1.075	7	10269	WT
0	1140898	1259	2.466	10	18450	WT
0	1140898	22092	2.573	11	22399	WT
0	1140898	37233	1.259	9	11324	WT
0	1140898	79403	0.726	6	10343	WT
0	1141068	2909	1.99	7	23812	WT
0	1141068	52079	1.785	11	14832	WT
0	1141068	26274	2.338	6	4755	WT
0	1141068	29923	2.438	9	11292	WT
0	1142812	46622	2.207	8	8316	WT
0	1142812	26665	1.926	7	9147	WT
0	1142812	44525	2.149	12	23238	WT
0	1142812	128277	1.863	9	23689	WT
0	1142812	29614	2.727	6	5451	WT
0	1142812	36701	1.266	8	23668	WT
0	1142812	156979	3.168	8	17839	WT
0	1142812	82355	0.385	6	7298	WT
0	1144249	100081	2.035	6	22216	WT
0	1144249	119934	2.101	8	11125	WT
0	1144249	138549	1.916	15	32683	WT
0	1144249	71965	2.449	6	14643	WT
0	1144249	138778	2.923	6	9833	WT
0	1144390	75997	2.22	8	22292	WT
0	1207314	131754	2.976	6	14452	WT
1	1255645	144166	2.282	6	16478	WT
1	1389471	38723	2.341	6	19780	WT
1	1389471	152524	2.371	6	15862	WT
1	1389471	23987	2.017	6	20068	WT
1	1389471	76318	1.762	6	6870	WT
1	1389471	154927	1.721	9	25847	WT
1	1389471	135659	2.929	6	7706	WT
1	1389471	4796	2.829	9	20256	WT
1	1389471	136309	3.287	6	5964	WT
1	1390141	1831	1.788	6	4192	WT
1	1390141	48783	2.562	6	6027	WT
1	1390141	32462	1.518	6	13487	WT
1	1623129	95019	1.088	9	32464	WT
0	1647767	38337	1.915	7	19899	WT
0	1647767	105351	1.741	6	22822	WT
0	1647767	72815	1.507	7	20301	WT
0	1647767	2106	3.257	6	11676	WT
0	1647823	149164	1.979	9	28465	WT
0	1647823	142402	2.182	6	14558	WT
0	1666983	158011	2.337	9	26269	WT
0	1666983	104979	1.981	8	27538	WT
0	1666983	141707	2.646	9	25399	WT
0	1666983	133484	1.698	6	13975	WT
0	1667635	148335	2.924	6	10857	WT
0	1669415	95157	1.543	6	12948	WT
0	1822645	64348	2.142	8	27181	WT
0	1822645	44509	2.756	10	29082	WT
0	1861929	2436	2.551	6	7864	WT
0	1861929	116177	2.528	7	14208	WT
0	1861929	138420	2.341	6	7011	WT
0	1861929	118027	2.222	10	26715	WT
0	1861929	142967	2.729	7	18287	WT
0	1861929	144816	2.116	6	17654	WT
0	1861929	99262	2.912	6	17345	WT
0	1861929	86920	3.215	6	10895	WT
0	1863334	145289	2.391	6	3124	WT
0	1863334	117791	1.645	6	23859	WT
0	1863334	37639	3.816	6	7035	WT
0	1905024	153116	3.17	6	20751	WT
0	1907587	24202	2.094	6	14442	WT
0	2180592	161009	2.698	12	32209	WT
0	2184299	16230	2.272	9	21639	WT
0	2184299	158796	2.154	6	7704	WT
0	2184299	124926	1.925	16	26179	WT
0	2184299	77134	1.684	6	18449	WT
0	2184299	137181	2.825	8	6793	WT
0	2184299	142490	0.797	8	20343	WT
0	2185804	66510	2.248	6	9795	WT
0	2185804	161266	2.164	9	22436	WT
0	2185804	61302	2.304	7	8533	WT
0	2185804	112389	1.989	6	20546	WT
0	2185804	137591	2.487	8	24526	WT
0	2185804	11652	2.507	10	18537	WT
0	2185804	156301	2.654	16	20722	WT
0	2186179	85301	2.582	6	8081	WT
0	2186179	1478	1.709	8	20370	WT
0	2186179	147715	1.486	7	15350	WT
0	2186947	28615	2.486	6	6302	WT
0	2188002	21102	3.004	6	18132	WT
0	2361593	14874	2.072	6	21159	WT
1	2377054	151516	2.832	11	26996	WT
0	2463887	61507	2.784	6	10945	WT
0	2485865	150369	2.793	6	22629	WT
1	2504755	56957	2.549	6	23349	WT
1	2742525	20161	2.117	8	27075	WT
1	2742525	155927	2.926	10	24300	WT
1	2749444	57374	1.569	6	12320	WT
1	2780556	107397	1.907	6	8209	WT
1	2780556	155211	1.836	6	23539	WT
1	2780556	24759	2.146	6	7283	WT
1	2780556	58449	2.548	7	13580	WT
1	2780556	115339	1.322	8	20191	WT
1	2782195	32204	2.555	10	30082	WT
1	2808150	147999	2.462	12	28715	WT
1	2808330	129873	2.275	10	28792	WT
1	2835562	27304	1.97	6	9220	WT
1	2835562	59152	2.307	10	20867	WT
1	2835562	80761	2.585	6	9284	WT
1	2835562	58276	1.082	6	16670	WT
1	2836453	26309	2.138	6	28414	WT
1	2836453	116522	2.191	7	14861	WT
1	2837476	33115	2.042	6	20424	WT
1	2837476	75624	1.938	7	18790	WT
0	2880108	143839	2.099	9	32845	WT
1	2920153	22399	2.482	8	27791	WT
1	2920153	83879	2.341	6	8322	WT
1	2920153	143126	2.938	8	28484	WT
1	2931527	157444	2.267	7	22685	WT
1	2936589	2681	2.085	6	23263	WT
1	2936589	21698	2.776	7	25601	WT
1	3034299	92702	2.682	8	15691	WT
1	3123132	3941	2.721	6	17100	WT
1	3184756	90499	2.353	6	25977	WT
1	3184756	120393	1.094	7	25657	WT
1	3186802	11060	2.66	6	10317	WT
1	3188931	26213	2.013	6	7417	WT
1	3218947	116490	3.155	7	15232	WT
1	3403684	22923	2.034	6	23659	WT
1	3403684	14732	2.646	6	25759	WT
0	3444034	87688	2.482	8	14664	WT
0	3490317	26118	1.303	7	19326	WT
0	3504031	28914	2.277	9	29810	WT
0	3504031	63775	2.562	10	29195	WT
0	3504031	115840	3.267	8	26822	WT
0	3504478	16159	2.604	6	24479	WT
0	3504478	7809	2.716	14	25759	WT
0	3504760	60244	2.556	6	19454	WT
0	3508711	8896	2.338	7	17496	WT
0	3508711	163155	2.871	9	31240	WT
0	3508711	19119	3.003	7	19912	WT
0	3510390	77231	2.485	7	23747	WT
0	3510390	40033	1.975	6	15618	WT
0	3510390	108228	1.435	6	17057	WT
1	3603674	14194	2.196	6	6217	WT
1	3603674	80847	2.19	6	13922	WT
1	3603674	65422	1.94	6	8058	WT
1	3603674	58518	3.01	8	16264	WT
1	3603674	140761	1.349	7	23778	WT
1	3606101	58153	1.893	8	26530	WT
1	3606101	152742	2.392	6	16629	WT
1	3610852	16399	2.606	7	29962	WT
1	3617260	86168	2.896	6	11177	WT
1	3621857	37370	2.294	7	11657	WT
1	3621857	21080	2.036	6	13868	WT
1	3622052	119312	2.72	6	9444	WT
1	3622052	40547	2.835	6	20812	WT
1	3622340	27488	1.952	7	12296	WT
1	3820093	127497	2.889	7	15256	WT
1	3830890	71504	3.038	13	23523	WT
1	3830890	73900	3.142	10	25499	WT
1	3831198	40174	2.401	12	21296	WT
1	3831198	158902	2.591	7	15239	WT
1	3831198	6454	3.015	6	14747	WT
1	3985878	3141	3.351	6	14161	WT
1	4029814	21086	1.65	7	20378	WT
1	4031322	127281	1.954	6	19647	WT
1	4031322	44214	2.292	6	7879	WT
1	4031322	93280	2.21	7	21800	WT
1	4031322	15418	2.476	12	28469	WT
1	4031322	6675	2.722	7	16440	WT
1	4032814	100755	2.129	6	14131	WT
1	4032814	88018	1.866	6	24890	WT
1	4032814	127710	1.745	7	13836	WT
1	4032814	156171	1.667	7	19735	WT
1	4032814	90700	2.962	7	17279	WT
1	4032814	135872	-0.823	9	9446	WT
1	4034669	117527	2.159	8	26313	WT
0	4156189	132094	2.033	8	21302	WT
0	4156189	15768	2.047	6	12485	WT
0	4156189	59525	1.925	8	17294	WT
0	4156189	21115	2.051	20	21284	WT
0	4156189	159837	1.865	6	7376	WT
0	4156189	13138	2.208	6	17746	WT
0	4156189	121173	1.601	16	28437	WT
0	4156189	73329	2.413	6	16912	WT
0	4156189	161834	1.352	6	6866	WT
0	4156189	69562	1.323	6	30383	WT
0	4156189	123423	2.673	7	10149	WT
0	4156189	75047	0.353	13	11435	WT
0	4156318	143167	1.563	6	15532	WT
0	4161299	6872	2.43	6	16441	WT
0	4167496	140578	2.074	6	20430	WT
0	4167496	99384	2.072	6	8186	WT
0	4167496	65288	2.024	6	12384	WT
0	4167496	30899	2.264	6	9942	WT
0	4167496	127967	3.026	7	18331	WT
0	4167496	150205	0.931	6	13042	WT
1	4292373	81389	1.81	8	12596	WT
1	4292373	61003	1.386	6	22647	WT
1	4292700	65334	2.309	7	28282	WT
1	4298214	51574	2.328	11	31321	WT
1	4298214	139543	2.265	6	9170	WT
1	4298214	27292	2.184	8	22319	WT
1	4298214	92166	1.407	6	7064	WT
0	1006	154619	1.456	6	10510	WT
1	72326	146777	1.952	10	31348	WT
0	105985	65985	2.184	6	14007	WT
1	138849	132153	1.417	6	18452	WT
0	338179	127756	1.568	6	14627	WT
0	338179	45418	1.353	6	15673	WT
0	394713	97786	1.94	11	35893	WT
0	394713	79825	1.866	6	3838	WT
0	394713	91789	2.663	6	6643	WT
0	394713	70197	1.504	6	16930	WT
0	394787	127557	2.475	6	17193	WT
0	415705	105500	1.972	7	17756	WT
0	415705	98632	2.428	7	28471	WT
0	415705	123222	1.925	6	7535	WT
1	439026	15763	2.765	7	15332	WT
1	439026	75918	1.707	12	31125	WT
1	439026	81479	2.839	8	14928	WT
1	441447	91850	2.446	7	12426	WT
1	441447	142465	2.262	6	10579	WT
1	441447	26435	2.044	7	9347	WT
1	441447	107283	2.618	6	8467	WT
1	441447	107955	1.736	6	5193	WT
1	442224	125957	2.426	6	12861	WT
1	442224	153843	2.744	6	25193	WT
1	444240	103648	2.278	7	20825	WT
1	444240	68327	2.135	7	31400	WT
1	448506	139883	3.306	6	18085	WT
0	518246	70254	2.303	6	15355	WT
0	525996	158394	2.612	6	18620	WT
1	634258	88468	2.152	10	31044	WT
1	634258	156747	2.402	7	11516	WT
1	634258	108710	2.615	6	16903	WT
1	634258	162523	1.104	7	5147	WT
1	636214	139449	2.465	7	19861	WT
1	636214	132613	2.562	8	28715	WT
1	693154	129052	1.447	6	17215	WT
0	737874	24483	2.072	8	17346	WT
0	743223	109244	2.522	6	32989	WT
0	743223	67641	2.453	9	29550	WT
0	749868	48330	2.155	12	20780	WT
0	749868	68361	1.984	10	16719	WT
0	749868	112665	2.494	6	11882	WT
0	753174	115753	2.254	6	11360	WT
0	754679	1035	2.271	10	15838	WT
0	754679	107597	2.366	11	16275	WT
0	755263	13946	1.591	6	20913	WT
0	756509	82789	2.364	11	30597	WT
0	757752	120571	2.209	9	18369	WT
0	757752	110450	2.469	7	16807	WT
0	757752	154574	2.925	8	33523	WT
0	758376	149553	1.293	7	8593	WT
0	758376	67770	1.058	7	3816	WT
0	758757	71301	2.743	8	33207	WT
0	758757	158816	1.686	12	34351	WT
0	760431	118948	2.167	12	35970	WT
0	760431	31651	2.249	6	3906	WT
0	760431	83456	2.477	6	2893	WT
0	760431	35002	2.513	6	3274	WT
0	760431	115666	1.919	6	4707	WT
0	810994	21405	1.789	6	14756	WT
0	950436	116060	2.296	10	28984	WT
0	950436	111902	0.298	6	11774	WT
0	953950	3841	2.601	10	28943	WT
1	1001154	59655	2.225	6	12992	WT
1	1001154	156344	2.477	9	27430	WT
0	1042959	59720	1.848	6	6486	WT
0	1042959	90761	2.703	9	32734	WT
0	1044908	26452	1.793	10	30296	WT
0	1044908	73154	2.493	7	11975	WT
0	1044908	35610	0.901	6	11805	WT
0	1135346	64922	1.776	9	22101	WT
0	1135346	120642	2.05	7	17948	WT
0	1135346	151400	1.656	6	15503	WT
0	1135346	95817	1.113	7	9290	WT
0	1137169	70379	2.195	8	24856	WT
0	1137169	122145	2.152	7	12287	WT
0	1137169	98946	1.527	10	25647	WT
0	1137169	29094	0.973	6	18412	WT
0	1137339	158353	2.235	7	7878	WT
0	1139083	145069	2.172	8	30044	WT
0	1139083	14884	2.933	11	30892	WT
0	1140520	6548	1.789	10	28498	WT
0	1140661	54041	2.042	6	13999	WT
0	1142427	79613	2.084	6	16141	WT
0	1144702	115804	1.871	6	8196	WT
1	1381601	119641	2.218	6	13431	WT
1	1387607	16638	2.006	7	9523	WT
1	1387607	145915	2.45	6	7931	WT
1	1387607	19760	2.65	6	13548	WT
1	1387607	161407	1.373	6	5811	WT
1	1387607	90743	1.265	6	8562	WT
1	1388277	51038	1.817	6	11525	WT
0	1647739	21116	1.04	7	10684	WT
0	1666954	47474	2.561	6	7473	WT
0	1666954	116623	2.616	7	12530	WT
0	1666954	41480	2.71	10	14547	WT
0	1667606	29262	1.883	8	16984	WT
0	1671867	137976	2.282	11	30751	WT
0	1671867	95332	3.037	6	22749	WT
0	1702838	98543	1.674	7	15810	WT
0	1820911	80060	1.29	8	28995	WT
0	1861919	75226	1.877	6	14240	WT
0	1861919	130055	2.926	19	32503	WT
0	1861919	70428	1.402	6	16528	WT
0	1863324	159932	1.988	7	15002	WT
0	1863324	47941	1.789	6	12157	WT
0	1863324	34941	2.572	6	9179	WT
0	1863324	89026	1.348	6	16912	WT
0	1863324	11908	1.135	7	9314	WT
0	1864000	91178	2.397	8	22553	WT
0	2042952	155463	2.352	7	20010	WT
0	2048747	27638	2.554	6	18235	WT
0	2105922	155940	3.396	6	15611	WT
0	2167008	10374	1.805	11	31950	WT
0	2172219	108047	1.918	6	21300	WT
0	2172219	148821	1.6	11	16502	WT
0	2172219	1970	1.646	7	7448	WT
0	2172219	42006	1.441	6	5670	WT
0	2172219	45454	2.967	7	7535	WT
0	2172594	5822	2.844	7	15853	WT
1	2309836	4201	1.889	6	23494	WT
1	2309836	37754	2.171	6	11966	WT
0	2410084	162413	2.482	6	15401	WT
0	2465737	163309	2.141	11	30607	WT
1	2484627	23477	1.756	6	11407	WT
1	2572106	122315	1.946	6	14027	WT
1	2732875	161588	2.839	7	19553	WT
1	2763953	148390	1.96	6	20235	WT
1	2763953	87583	2.052	6	18008	WT
1	2763953	53204	1.789	10	32234	WT
1	2763953	2676	1.571	8	8758	WT
1	2763953	144406	2.472	7	9611	WT
1	2763953	111818	2.767	6	34001	WT
1	2766300	30518	2.359	6	19749	WT
1	2812417	31594	1.913	7	26328	WT
1	2819270	120149	1.789	12	33353	WT
1	2819270	78328	1.71	6	6202	WT
1	2820161	145784	2.376	7	29719	WT
1	2821184	89270	2.239	7	20249	WT
1	2822711	129094	2.024	11	31789	WT
1	2826425	145808	1.603	6	18654	WT
0	2865200	14002	2.976	6	15323	WT
0	2865200	153754	1.015	6	10079	WT
1	2903210	5595	2.774	6	12175	WT
1	2914584	69003	1.616	6	16205	WT
1	2917002	152634	1.902	7	9877	WT
1	2917002	95570	1.258	8	27817	WT
1	2919646	162344	1.502	6	7719	WT
1	2919646	119523	1.07	6	9591	WT
1	3014975	47486	2.091	7	11917	WT
1	3014975	14786	2.011	7	10649	WT
1	3016744	82781	2.568	6	22735	WT
1	3016744	39742	1.729	6	13080	WT
1	3016744	17057	2.911	6	10715	WT
1	3016744	152120	1.415	7	26800	WT
1	3018130	117257	2.233	7	13690	WT
1	3018130	91000	2.572	6	10845	WT
1	3149216	144947	1.954	9	27567	WT
1	3173398	78742	2.981	6	10367	WT
1	3203414	110843	2.842	6	22928	WT
1	3289998	127569	2.252	8	36421	WT
1	3378312	47297	2.112	6	13595	WT
1	3387798	135707	1.88	6	27062	WT
1	3388486	77811	2.043	10	33093	WT
0	3466196	59396	2.567	6	17356	WT
0	3485197	160359	2.074	6	9276	WT
0	3485197	37590	2.276	6	15169	WT
0	3485197	129346	2.015	12	32743	WT
0	3485197	116361	2.624	8	26100	WT
0	3485197	93118	3.422	6	10900	WT
0	3489877	148062	3.191	6	9053	WT
0	3491556	88834	2.521	6	9533	WT
0	3491556	89101	2.958	6	22222	WT
0	3492821	125902	3.105	6	17216	WT
1	3582696	7774	2.543	8	31741	WT
1	3582696	138914	2.627	9	31928	WT
1	3582696	17746	2.883	7	31848	WT
1	3582696	31057	1.245	6	13274	WT
1	3582730	2657	3.057	6	9667	WT
1	3585123	32885	2.995	8	25100	WT
1	3585123	101964	0.88	6	9025	WT
1	3593651	108937	2.373	6	11857	WT
1	3600879	117517	1.562	9	10927	WT
1	3600879	9976	1.215	6	7804	WT
1	3601362	90508	1.958	6	12982	WT
1	3602392	108944	2.847	6	8287	WT
1	3602392	91661	2.884	9	35537	WT
0	3796276	78440	2.882	6	18987	WT
1	3810528	139926	1.213	6	11789	WT
1	3815414	148079	2.216	6	9727	WT
1	3815414	96621	2.175	6	7233	WT
1	3815414	82644	2.348	6	9565	WT
1	3815414	118567	2.307	6	9110	WT
1	3815414	116252	1.502	8	11322	WT
1	3815414	66882	1.471	6	11363	WT
1	3819467	146988	1.453	6	11553	WT
1	3834830	146459	3.374	6	27665	WT
0	3948317	83695	2.07	6	6691	WT
1	3971313	22545	2.863	6	9832	WT
0	3983800	97159	2.272	6	15545	WT
1	4015249	97668	1.806	7	19183	WT
1	4015249	82452	1.49	6	10427	WT
1	4015249	24037	1.063	7	8125	WT
1	4016757	122039	2.829	6	8963	WT
1	4018249	23780	1.748	6	4819	WT
1	4018249	15424	2.403	6	6374	WT
1	4019116	57658	2.727	6	7235	WT
1	4020104	61109	1.45	11	21434	WT
1	4020437	42358	1.925	9	29397	WT
0	4141283	52691	2.306	10	33481	WT
0	4141283	141180	2.28	6	7976	WT
0	4141283	29343	1.478	12	31867	WT
0	4141283	125022	2.844	7	11535	WT
0	4141283	19661	3.382	6	12710	WT
0	4141412	120762	2.606	7	14470	WT
0	4141412	78694	2.759	6	9139	WT
0	4141412	47840	0.121	6	15912	WT
0	4146393	2383	1.917	6	13561	WT
0	4152601	66564	1.928	6	8956	WT
0	4152601	75460	1.531	11	25900	WT
1	4281185	5316	2.156	6	15113	WT
1	4281185	88583	2.296	6	10123	WT
0	1006	148406	1.329	6	10655	WT
1	43276	81614	1.917	6	21317	WT
1	43276	113501	1.604	6	17105	WT
1	64711	38961	2.302	6	19304	WT
1	72594	121266	2.696	9	32159	WT
1	72594	18536	2.705	6	31151	WT
0	90045	21584	2.104	8	29629	WT
0	99235	39375	2.355	7	19136	WT
0	106281	152151	1.203	6	11143	WT
0	109248	107701	2.298	6	16459	WT
0	109719	23698	2.469	6	14108	WT
0	116793	84023	2.41	6	14170	WT
0	116793	107524	2.89	6	27859	WT
1	139145	139177	3.002	6	14506	WT
0	162504	113405	3.183	8	19829	WT
0	166963	142201	2.978	6	24171	WT
0	344301	21342	1.93	7	24830	WT
0	344301	27408	1.883	7	11322	WT
0	344301	54681	2.534	6	20851	WT
0	346178	112513	1.867	7	25003	WT
0	346178	102028	1.569	6	19860	WT
0	346178	143721	2.355	6	21611	WT
0	346178	121568	1.424	6	24658	WT
0	346178	154149	2.554	6	10419	WT
0	346178	126909	2.707	10	32171	WT
0	346178	117143	2.713	7	25596	WT
0	347974	50309	2.591	6	11716	WT
0	347974	72087	2.811	6	10955	WT
0	392101	158443	1.526	7	18378	WT
0	392101	56154	1.269	7	11708	WT
0	392230	93412	2.919	6	28403	WT
0	395480	59588	1.687	6	30839	WT
0	417032	32502	2.055	6	7515	WT
0	421752	2000	1.512	9	16513	WT
0	421752	56458	2.254	13	32388	WT
0	421752	121655	1.466	6	9683	WT
0	421752	130986	1.478	6	9295	WT
1	435371	146918	2.169	12	24229	WT
1	439534	27298	2.525	8	23327	WT
1	439534	77697	1.756	8	23886	WT
1	439534	156597	2.896	10	28279	WT
1	439597	143855	2.409	6	15222	WT
0	441494	23211	2.622	6	27072	WT
1	443040	110588	2.396	8	24054	WT
1	443040	41892	1.705	6	9358	WT
1	443040	152354	1.431	9	29972	WT
1	443040	112064	2.651	9	19825	WT
1	445226	136578	2.23	6	6637	WT
1	445226	7342	1.702	7	11595	WT
1	445226	110326	0.919	8	19874	WT
1	445226	59975	0.929	6	24550	WT
1	447647	49984	0.472	7	9714	WT
1	448424	71468	2.074	6	7001	WT
1	448424	128553	2.155	7	26678	WT
1	448424	110054	2.704	7	19694	WT
1	448424	142746	2.916	8	18071	WT
1	449401	9654	2.37	6	18304	WT
1	449401	66363	2.486	6	5073	WT
1	450440	43662	2.954	7	21720	WT
1	450465	65431	1.901	8	13446	WT
1	450484	98082	2.779	7	17143	WT
1	450994	24746	2.686	8	22501	WT
1	452477	91832	2.089	6	23741	WT
1	454706	117644	1.965	6	25430	WT
1	458111	89447	2.328	6	28963	WT
1	458111	130317	2.821	8	32815	WT
1	458111	57084	2.897	8	28575	WT
1	458111	32413	2.938	6	10890	WT
1	459871	126471	2.176	6	23463	WT
1	459871	144065	1.866	6	16545	WT
0	533551	103608	0.738	7	31046	WT
1	555121	144567	2.102	6	17005	WT
0	563811	61569	2.86	6	26345	WT
0	572810	155683	3.174	6	18893	WT
1	636205	73014	2.168	7	23847	WT
1	636205	145225	2.593	7	17096	WT
1	636205	73321	2.693	6	10485	WT
1	641781	161530	2.236	9	10780	WT
1	641781	79773	2.379	7	30521	WT
1	641781	136207	1.939	8	15652	WT
1	641781	53876	2.974	7	16072	WT
1	641781	3310	1.432	6	13642	WT
1	641781	22794	1.205	6	6693	WT
1	641781	88322	1.207	7	16429	WT
1	641927	47443	2.446	7	14213	WT
1	641927	106277	2.72	7	18598	WT
1	643737	62759	2.263	6	16231	WT
1	643737	112203	1.342	6	16983	WT
1	643737	106469	3.408	6	14220	WT
1	643940	43987	2.288	6	24994	WT
1	643940	156197	2.948	10	32850	WT
0	681061	112455	2.178	6	17951	WT
0	681061	858	3.279	6	27619	WT
0	685312	12670	2.814	6	13256	WT
1	703061	69242	1.99	9	31101	WT
0	745402	31512	2.249	7	15330	WT
0	747828	81817	2.436	7	23086	WT
0	747828	17560	1.823	7	10125	WT
0	747828	141252	2.636	6	8835	WT
0	747828	8726	2.686	7	19324	WT
0	747828	110811	1.087	6	31740	WT
0	751284	116837	2.156	9	22099	WT
0	751284	32693	2.485	8	14341	WT
0	751284	45243	1.399	6	4848	WT
0	751284	15335	1.275	6	5612	WT
0	751518	7113	1.831	8	26069	WT
0	751922	118099	1.571	6	16417	WT
0	753892	62690	2.268	7	26621	WT
0	753892	45652	2.388	8	12175	WT
0	753892	91121	1.436	8	33568	WT
0	753892	119552	0.991	6	11474	WT
0	754402	134011	2.53	6	13235	WT
0	757929	149934	2.28	6	9097	WT
0	761235	150873	2.284	8	18641	WT
0	761235	91323	2.377	8	20760	WT
0	761235	160694	2.316	7	15531	WT
0	761235	69791	2.31	10	12078	WT
0	761235	135395	2.074	7	20158	WT
0	761235	121210	2.448	9	9748	WT
0	761235	28061	2.567	6	6711	WT
0	761235	121118	2.503	7	12825	WT
0	761235	50638	1.849	7	15759	WT
0	761235	121903	1.702	9	11502	WT
0	761235	145982	2.755	6	9113	WT
0	761235	148664	2.809	9	17730	WT
0	761235	88842	2.936	6	8820	WT
0	761235	52779	2.966	9	22738	WT
0	761235	79448	2.858	6	15344	WT
0	761235	143840	3.15	6	19147	WT
0	762740	107613	2.065	9	9553	WT
0	762740	147355	2.408	6	21164	WT
0	762740	62438	2.388	9	10951	WT
0	762740	81474	2.493	9	8596	WT
0	762740	90165	1.373	8	33928	WT
0	763324	11591	2.149	9	28613	WT
0	763324	153383	2.73	20	31355	WT
0	764570	35913	1.655	9	17678	WT
0	764570	10911	3.106	10	17355	WT
0	764570	78053	3.184	6	19272	WT
0	765813	133661	2.347	7	5460	WT
0	765813	140691	2.293	6	8393	WT
0	765813	107431	2.376	9	14023	WT
0	765813	52475	1.532	7	12479	WT
0	765813	134661	2.872	8	15565	WT
0	766437	93406	2.245	7	17756	WT
0	766437	107050	1.823	13	29592	WT
0	766437	31194	2.356	8	15464	WT
0	766437	127203	2.403	7	10118	WT
0	766437	111326	1.317	6	12336	WT
0	766818	18451	0.711	6	3548	WT
0	768492	38533	2.715	6	13201	WT
0	768492	103604	1.349	9	25748	WT
0	768983	43435	2.052	8	29423	WT
0	768983	137084	2.526	6	26106	WT
0	777904	23112	2.981	6	21818	WT
1	839050	114471	2.252	6	21485	WT
1	847089	4934	2.13	6	14546	WT
1	847089	119084	1.357	6	12601	WT
0	951209	52178	1.966	6	13888	WT
0	951209	70221	2.816	10	28374	WT
0	951209	53605	1.397	7	30325	WT
0	957570	121040	2.011	6	7834	WT
0	957570	80234	2.801	10	22778	WT
0	957570	90890	2.844	6	9414	WT
0	957570	52213	0.824	6	11024	WT
0	959198	66185	2.164	6	25559	WT
0	959198	52478	1.752	8	14725	WT
0	961084	74558	2.311	8	19239	WT
0	961084	120436	2.327	7	23266	WT
0	961084	21458	1.811	6	19682	WT
0	961084	32173	1.619	6	24296	WT
0	961924	156480	2.357	6	17435	WT
0	969612	98457	2.147	6	21858	WT
0	969612	40296	2.058	7	31543	WT
0	969612	75954	1.408	6	14380	WT
0	969612	136661	3.101	8	34366	WT
1	1002152	129298	2.458	6	19941	WT
1	1008546	100463	2.041	9	34048	WT
1	1008546	57355	2.032	8	21180	WT
1	1008546	160916	2.844	9	25568	WT
1	1035841	2503	1.829	6	25671	WT
0	1044668	80002	2.178	12	33738	WT
0	1044668	3221	2.259	6	18258	WT
0	1044668	7325	1.745	8	16003	WT
0	1044668	142377	2.618	7	27904	WT
0	1046736	155129	2.191	8	28589	WT
0	1046736	42829	1.69	6	16380	WT
0	1046736	3524	1.295	6	13669	WT
0	1047394	54754	2.032	7	34878	WT
0	1050350	27381	2.043	7	23212	WT
0	1050350	19590	1.74	11	32441	WT
0	1050350	160292	1.662	6	28684	WT
0	1050350	33714	1.458	7	34376	WT
0	1050350	64620	2.65	8	23822	WT
1	1051092	2360	2.003	6	26693	WT
0	1052299	32020	1.182	7	32727	WT
0	1067304	52517	2.31	6	19444	WT
0	1068502	122986	1.116	6	18051	WT
0	1076484	147950	2.257	6	10027	WT
0	1076484	125433	1.737	7	35181	WT
0	1076490	62990	2.323	6	14348	WT
0	1142720	18143	2.151	7	7946	WT
0	1142720	108144	1.894	7	9283	WT
0	1142720	159263	2.205	7	13195	WT
0	1142720	123100	1.669	15	29181	WT
0	1142720	67271	2.394	6	23492	WT
0	1142720	48256	1.661	7	18309	WT
0	1142720	51608	2.471	12	36036	WT
0	1142720	146116	1.595	8	18257	WT
0	1142720	94845	2.512	8	14259	WT
0	1142720	7157	2.659	10	19523	WT
0	1142720	85536	2.773	10	20073	WT
0	1144543	141298	1.541	6	15488	WT
0	1144543	8587	1.17	7	11435	WT
0	1144713	64632	2.08	12	24951	WT
0	1144713	148061	2.006	7	17233	WT
0	1146457	109245	1.93	14	25214	WT
0	1146457	12572	1.897	7	8896	WT
0	1146457	84801	1.685	8	19230	WT
0	1146457	91667	2.198	8	18574	WT
0	1146724	107406	1.985	8	18897	WT
0	1146724	145841	1.333	8	25384	WT
0	1147894	54036	2.619	6	26523	WT
0	1147894	58767	1.289	6	7963	WT
0	1148035	60424	1.606	8	25637	WT
0	1148856	129628	2.209	8	10684	WT
0	1149801	22206	1.844	6	20617	WT
0	1152076	31928	2.205	9	26602	WT
0	1212914	106906	2.203	6	20860	WT
0	1229870	87762	2.998	7	25371	WT
0	1244750	70437	2.574	10	32061	WT
0	1250325	19666	2.644	6	30256	WT
1	1258598	100432	2.098	6	18321	WT
1	1389100	61802	2.055	7	21685	WT
1	1395105	47676	2.193	9	29928	WT
1	1395105	73420	2.656	6	16502	WT
1	1395105	3791	2.631	8	26783	WT
1	1395105	133112	2.705	6	9905	WT
1	1395105	141924	2.704	11	21600	WT
1	1395105	37226	1.519	12	31717	WT
1	1395105	33039	1.216	6	24887	WT
1	1395105	69280	0.857	6	2429	WT
1	1395775	92689	1.822	6	4771	WT
1	1395775	80516	2.296	6	15658	WT
1	1396465	156005	2.392	6	15995	WT
0	1533152	99363	2.294	6	18433	WT
0	1533152	126179	3.205	6	22750	WT
0	1598299	27868	2.116	7	17195	WT
0	1598299	32771	1.996	6	21606	WT
0	1602015	12802	2.857	6	27114	WT
1	1606093	120431	1.655	6	32672	WT
1	1623954	154953	1.996	10	31364	WT
1	1623954	92487	2.685	6	19237	WT
1	1623954	65644	3.479	6	18782	WT
1	1625858	153172	2.234	6	31663	WT
0	1648943	59154	1.697	6	6213	WT
0	1648943	12621	1.989	6	24840	WT
0	1648943	52593	1.826	7	19968	WT
0	1648943	115612	1.389	7	8958	WT
0	1648943	117120	2.085	7	27439	WT
0	1648943	124639	2.599	6	19321	WT
0	1648943	83822	2.767	6	19811	WT
0	1648999	80944	2.56	6	18641	WT
0	1651018	104509	2.815	10	30793	WT
0	1651785	70692	2.364	9	34245	WT
0	1662489	110843	2.273	11	32427	WT
0	1662489	77973	1.845	6	30423	WT
0	1668159	156183	2.292	7	20731	WT
0	1668159	52970	2.427	9	14446	WT
0	1668159	72836	2.588	6	5568	WT
0	1668159	76057	2.653	6	13382	WT
0	1668159	3351	1.711	10	26003	WT
0	1668811	161770	2.149	6	15165	WT
0	1668811	34665	1.949	6	12548	WT
0	1668811	123211	1.813	6	12230	WT
0	1668811	91850	3.473	8	13119	WT
0	1669453	154972	2.802	9	30990	WT
0	1670591	10591	2.654	7	10420	WT
0	1673072	134415	1.781	6	20944	WT
0	1673072	96389	0.859	6	13053	WT
0	1676625	142362	1.254	6	17171	WT
0	1687254	22261	2.201	6	22541	WT
0	1705402	123407	1.686	7	32714	WT
0	1831937	121792	2.126	6	28853	WT
0	1831937	159525	2.197	10	30494	WT
0	1831937	54687	2.514	6	27565	WT
0	1831937	85270	1.978	6	26935	WT
0	1833643	149392	2.011	6	9209	WT
0	1833643	123967	2.285	6	15870	WT
0	1833643	16757	2.701	7	24377	WT
0	1863531	2795	1.89	6	16331	WT
0	1872966	153695	2.178	9	12946	WT
0	1872966	119106	2.22	8	29467	WT
0	1872966	25612	2.45	6	20830	WT
0	1872966	57205	1.973	6	12773	WT
0	1872966	4097	1.978	7	12554	WT
0	1872966	33336	1.888	6	28015	WT
0	1872966	52184	2.628	6	18204	WT
0	1872966	29150	2.662	7	24641	WT
0	1872966	80123	1.821	6	18991	WT
0	1872966	16115	2.889	6	32907	WT
0	1872966	33141	3.001	6	22668	WT
0	1872966	137147	3.115	6	30187	WT
0	1872966	88715	2.936	6	12263	WT
0	1872966	106846	1.197	6	13911	WT
0	1872966	93371	1.212	6	9545	WT
0	1872966	119886	1.16	7	8415	WT
0	1874371	25362	1.742	7	11017	WT
0	1874371	128446	2.753	7	4704	WT
0	1874371	26599	1.413	7	8811	WT
0	1874371	118966	1.326	8	10956	WT
0	1874371	19329	0.784	7	13778	WT
0	1874467	99175	2.217	7	17104	WT
0	1874467	82009	2.99	6	14992	WT
0	1875047	103818	1.665	7	19540	WT
1	1895565	90171	2.702	6	12410	WT
1	1895565	99342	2.769	6	9465	WT
0	1916084	125948	2.803	8	33347	WT
0	1918647	78482	1.959	6	13734	WT
0	1920076	95214	3.103	6	16895	WT
0	2071884	163343	2.259	8	31524	WT
0	2071884	92004	2.337	7	11813	WT
0	2071884	73861	1.635	6	12867	WT
0	2128997	39252	1.885	6	33394	WT
1	2131175	80865	2.038	6	25157	WT
0	2191974	18039	2.31	6	21867	WT
0	2191974	145902	2.502	8	15963	WT
0	2195681	35462	2.394	6	7733	WT
0	2195681	23995	2.179	13	20220	WT
0	2195681	152214	2.301	13	28210	WT
0	2195681	146984	2.452	7	18757	WT
0	2195681	95295	2.074	9	16033	WT
0	2195681	62535	2.527	9	9449	WT
0	2195681	135912	2.457	6	20274	WT
0	2195681	39266	2.508	10	15932	WT
0	2195681	150983	2.698	10	31988	WT
0	2195681	146427	1.381	8	15263	WT
0	2195681	83211	3.464	7	19174	WT
0	2195681	16271	3.794	6	12867	WT
0	2197186	38333	2.437	6	13338	WT
0	2197186	69856	2.17	7	9919	WT
0	2197186	118370	2.601	7	13619	WT
0	2197186	147441	2.689	7	31453	WT
0	2197186	132029	1.787	10	18715	WT
0	2197186	90217	2.756	7	12161	WT
0	2197186	93596	1.729	11	22411	WT
0	2197186	5435	1.584	9	17922	WT
0	2197186	117333	1.56	7	23355	WT
0	2197186	18652	3.296	7	13442	WT
0	2197186	21469	1.054	15	33101	WT
0	2197186	119067	3.61	7	15945	WT
0	2197561	59527	2.25	8	4969	WT
0	2197561	116312	2.242	6	5436	WT
0	2197561	46833	2.025	6	18388	WT
0	2197561	28547	2.583	6	12892	WT
0	2197657	33352	1.934	6	8025	WT
0	2197657	107040	1.712	8	20731	WT
1	2307400	127067	1.656	6	21779	WT
1	2343680	29528	1.965	9	31543	WT
1	2343680	158349	1.681	7	13056	WT
1	2343680	37983	1.509	7	25067	WT
1	2343680	115769	2.526	6	16683	WT
1	2343680	73970	2.418	8	29561	WT
1	2368456	19988	2.492	6	16584	WT
1	2368456	11722	2.608	6	19547	WT
1	2368456	100425	2.814	6	14448	WT
0	2382529	44233	1.614	6	19477	WT
1	2394280	133765	2.224	8	21454	WT
1	2394280	131721	1.143	12	33244	WT
1	2394280	77566	0.842	7	11558	WT
1	2394964	72370	1.632	6	13907	WT
1	2398162	128722	1.778	6	16123	WT
1	2398162	74404	2.732	6	14756	WT
1	2400120	52503	2.225	6	13769	WT
1	2402760	127112	2.02	6	13823	WT
1	2402760	5447	2.317	6	32017	WT
1	2402760	146668	2.493	6	14943	WT
1	2432696	80341	2.314	6	27907	WT
0	2447325	65764	1.873	8	29785	WT
0	2447325	93620	2.598	7	14669	WT
0	2447325	118349	1.086	9	26798	WT
0	2451173	78217	2.706	6	15703	WT
1	2454737	48229	1.681	6	21478	WT
0	2462579	123499	1.162	7	27527	WT
1	2464386	120824	2.938	7	19164	WT
0	2479552	3067	2.788	8	29173	WT
0	2502978	79372	1.151	9	27159	WT
1	2520305	17964	2.455	8	23898	WT
1	2520305	106271	2.41	6	21500	WT
1	2520305	37061	2.512	6	15577	WT
1	2520305	39609	3.093	7	18981	WT
1	2522575	55260	1.656	6	25455	WT
1	2666258	84244	2.6	6	21589	WT
1	2668143	150531	1.748	8	20527	WT
1	2738680	48170	2.331	7	23521	WT
1	2738680	107012	1.638	6	27553	WT
1	2738680	69415	2.622	6	21528	WT
1	2738680	135720	1.754	6	30265	WT
1	2738680	74684	1.542	6	18113	WT
1	2759321	16809	2.096	6	11389	WT
1	2761741	110983	2.46	6	14760	WT
1	2761741	138154	1.017	6	11866	WT
1	2763157	28096	2.043	8	29223	WT
1	2763157	144608	2.897	6	12624	WT
1	2765264	27618	2.578	6	11544	WT
1	2799808	157658	1.998	7	25672	WT
1	2799808	83161	1.785	6	31431	WT
1	2799808	99593	1.8	8	18688	WT
1	2799808	90762	2.409	7	25965	WT
1	2799808	129002	2.803	6	20615	WT
1	2799808	61992	2.859	11	27180	WT
1	2799808	104758	0.829	7	13670	WT
1	2799808	89553	0.951	8	35625	WT
1	2801447	47141	2.189	6	12723	WT
1	2801447	30663	1.998	10	26257	WT
1	2802155	29960	2.534	6	17314	WT
1	2802155	135244	1.471	7	25766	WT
1	2802155	128718	1.193	7	29664	WT
1	2825586	45211	2.229	6	13876	WT
1	2827668	24616	2.133	11	24624	WT
1	2827668	16153	2.468	10	31226	WT
1	2827668	88223	2.65	6	11536	WT
1	2827668	117586	3.069	6	30338	WT
1	2843772	48119	2.702	7	21919	WT
1	2849235	28435	2.396	10	32617	WT
1	2849235	155530	2.503	7	25871	WT
1	2849235	108177	2.731	6	29760	WT
1	2855080	117253	2.298	8	23705	WT
1	2855080	99707	2.321	9	32909	WT
1	2855080	66826	2.256	6	28254	WT
1	2855080	59536	2.661	8	15685	WT
1	2855080	91184	1.596	8	29051	WT
1	2855080	96858	1.387	7	16036	WT
1	2855971	73062	2.206	7	25977	WT
1	2855971	99795	2.613	12	34163	WT
1	2855971	55142	1.739	7	25322	WT
1	2855971	14591	2.736	9	29966	WT
1	2855971	48967	1.69	6	15228	WT
1	2855971	117522	2.804	6	18455	WT
1	2855971	96634	1.23	6	21478	WT
1	2856994	60030	1.997	7	22653	WT
1	2856994	42719	2.948	6	25701	WT
1	2858521	8104	1.448	9	31469	WT
1	2858521	87128	0.785	7	19294	WT
1	2877335	47544	2.107	6	27442	WT
0	2898970	144182	2.274	6	24342	WT
0	2898970	50297	1.75	6	12773	WT
0	2898970	84221	1.657	6	31375	WT
0	2901010	96967	2.084	7	17429	WT
0	2901010	20102	2.185	8	21388	WT
0	2901010	51463	2.522	7	18338	WT
0	2901010	100626	2.566	7	17147	WT
1	2939016	10609	2.729	8	33919	WT
1	2939016	153367	2.951	6	13056	WT
1	2939016	133745	1.904	6	19463	WT
1	2939016	45333	3.187	8	20899	WT
1	2955452	44427	1.94	6	7606	WT
1	2957148	67849	2.492	6	15747	WT
1	2969867	37643	2.281	6	18532	WT
1	3051073	69757	2.374	6	18559	WT
1	3051073	160437	2.404	7	30454	WT
1	3051073	86244	2.097	7	12208	WT
1	3051073	100734	2.491	7	14168	WT
1	3051073	135687	2.053	10	21905	WT
1	3051073	77668	2.735	7	25374	WT
1	3051073	149126	3.323	7	27462	WT
1	3051073	148107	0.798	7	12716	WT
1	3052842	61093	1.915	6	8521	WT
1	3052842	38741	1.557	8	21378	WT
1	3059850	100292	2.973	6	25529	WT
1	3086230	59696	2.339	7	27286	WT
1	3086230	54684	1.683	6	15674	WT
1	3086230	90511	2.732	7	18348	WT
1	3098587	39010	1.841	7	30323	WT
1	3123173	3345	2.632	6	27214	WT
1	3123173	19352	1.761	6	10773	WT
1	3150142	98305	1.968	8	20495	WT
1	3185439	66400	2.277	6	22246	WT
1	3185439	137889	2.809	6	27782	WT
1	3205279	133283	1.902	6	16400	WT
1	3205279	105830	1.711	10	32755	WT
1	3205279	58369	2.241	8	13264	WT
1	3205279	57427	2.385	6	8509	WT
1	3207325	14759	2.643	6	23942	WT
1	3207325	60408	1.451	7	25292	WT
1	3209454	10267	2.147	6	7750	WT
1	3209454	118056	3	10	25077	WT
1	3225548	129442	1.394	7	17862	WT
1	3230796	129565	1.567	6	14838	WT
1	3239577	147599	2.401	6	8309	WT
1	3239577	128673	2.588	6	12732	WT
1	3241214	114654	2.649	6	16907	WT
1	3241214	91471	1.737	6	11963	WT
1	3309307	12230	2.205	6	16581	WT
1	3315342	99783	2.464	6	30491	WT
1	3417319	76131	1.833	9	22624	WT
1	3419724	20412	1.253	6	11202	WT
1	3426805	1663	1.962	6	27674	WT
1	3426805	127244	2.095	7	16973	WT
1	3426805	109456	2.594	6	15232	WT
1	3457205	99339	2.204	6	30949	WT
0	3467156	74375	2.165	7	25391	WT
0	3467156	149808	2.028	6	12598	WT
0	3467156	153062	2.472	6	14962	WT
0	3467156	101600	1.758	6	15529	WT
0	3467156	118413	2.983	6	21415	WT
0	3470309	117647	0.937	6	19710	WT
0	3470774	37511	2.196	9	27256	WT
0	3470774	43300	2.742	6	13446	WT
0	3472422	19595	2.133	6	9033	WT
0	3472422	42900	0.78	6	9048	WT
0	3513424	48030	1.347	7	16796	WT
0	3525666	89492	2.287	9	28202	WT
0	3525666	41757	1.974	10	26104	WT
0	3525666	59689	1.45	6	27601	WT
0	3525666	120704	2.883	9	21178	WT
0	3526113	151675	1.966	7	16074	WT
0	3526113	136507	2.491	8	29168	WT
0	3526113	90581	2.796	10	19659	WT
0	3526113	36841	0.864	6	19184	WT
0	3526635	128287	2.166	10	17201	WT
0	3527532	23391	2.24	9	31416	WT
0	3527532	19803	2.305	6	29784	WT
0	3530344	152003	2.694	11	31132	WT
0	3530344	138923	2.872	7	27404	WT
0	3532023	142274	1.744	8	30337	WT
0	3532023	162963	1.264	7	19057	WT
0	3533288	12310	2.129	6	9002	WT
0	3533288	109781	1.99	7	9888	WT
1	3626665	144124	1.97	7	12403	WT
1	3626665	96114	2.627	8	14030	WT
1	3626665	16018	2.838	6	16407	WT
1	3626665	32029	1.527	7	29646	WT
1	3629092	135553	1.989	6	13939	WT
1	3629092	158492	1.76	6	19393	WT
1	3629092	161698	2.521	12	32367	WT
1	3640251	21284	2.194	9	31679	WT
1	3640251	87785	2.198	7	22841	WT
1	3644848	118819	2.073	8	31226	WT
1	3644848	161042	1.948	6	15228	WT
1	3644848	157922	2.48	6	13533	WT
1	3644848	29836	2.526	13	28845	WT
1	3645043	79856	1.78	7	18638	WT
1	3645043	79701	2.295	6	8680	WT
1	3645043	2669	1.596	7	10026	WT
1	3645331	13167	2.127	6	23184	WT
1	3647825	111980	2.222	7	9976	WT
1	3649744	146248	1.66	9	21927	WT
1	3853996	16455	2.559	7	16007	WT
1	3853996	42625	2.954	9	22102	WT
1	3858882	156647	2.129	6	7776	WT
1	3858882	108634	2.306	6	9414	WT
1	3858882	14094	2.176	8	14059	WT
1	3858882	157284	2.354	8	19833	WT
1	3858882	47179	2.451	6	10647	WT
1	3858882	66845	1.966	8	15785	WT
1	3858882	162662	2.5	10	30265	WT
1	3858882	70042	1.736	6	22080	WT
1	3858882	122947	2.664	6	24900	WT
1	3858882	15027	2.949	7	29894	WT
1	3858882	21140	1.524	6	9150	WT
1	3859190	146771	1.602	6	24636	WT
1	3859454	28649	2.5	7	31906	WT
1	3860211	159982	1.912	12	32282	WT
1	3860211	29171	2.373	9	33508	WT
1	3860211	66698	2.532	6	16219	WT
0	3982473	157002	2.147	7	14752	WT
0	3983301	62520	2.383	6	30684	WT
0	3992137	133847	1.461	6	13550	WT
0	3992137	112305	2.044	6	14121	WT
0	3992137	119587	2.236	6	19231	WT
0	3992137	30362	2.264	7	29721	WT
0	4007557	97275	3.085	6	13613	WT
1	4015132	134838	2.316	6	33607	WT
1	4015132	154651	2.379	6	16846	WT
1	4015132	9084	2.184	6	8158	WT
1	4015132	161902	2.514	9	26620	WT
1	4015132	136051	2.659	6	18695	WT
1	4015132	128629	1.613	7	10683	WT
1	4015132	135333	1.494	6	7001	WT
1	4015132	52677	3.423	6	20733	WT
0	4016478	140899	2.226	6	17434	WT
1	4051115	113294	1.596	8	17928	WT
1	4059006	12326	2.134	13	27701	WT
1	4059006	63509	2.058	9	26012	WT
1	4059006	19117	2.37	9	31140	WT
1	4059006	91722	2.434	8	28739	WT
1	4059006	117106	1.757	7	11052	WT
1	4059006	134326	2.784	7	10626	WT
1	4060514	131523	2.187	8	27655	WT
1	4060514	157742	2.341	7	25137	WT
1	4060514	39416	2.374	8	30544	WT
1	4060514	10512	2.01	10	23182	WT
1	4060514	99773	1.753	6	7322	WT
1	4060514	62221	1.582	7	6605	WT
1	4062006	83816	2.041	13	25438	WT
1	4062006	145202	2.323	10	15199	WT
1	4062006	49771	2.324	9	13063	WT
1	4062006	101293	1.926	6	13683	WT
1	4062006	14177	2.403	10	31845	WT
1	4062006	20721	1.831	10	22278	WT
1	4062006	60458	1.816	8	16042	WT
1	4062006	145399	2.861	6	17931	WT
1	4062134	129067	2.075	7	25827	WT
1	4062873	132991	2.028	6	15339	WT
1	4063861	123492	2.811	8	27296	WT
1	4066776	54100	2.431	7	20848	WT
0	4185731	43677	2.312	8	29471	WT
0	4185731	42425	1.947	9	26259	WT
0	4185731	138146	2.309	6	7254	WT
0	4185731	126180	2.449	8	21210	WT
0	4185731	30425	2.467	6	5599	WT
0	4185731	162123	2.517	6	7654	WT
0	4185731	30499	2.571	7	28309	WT
0	4185731	142444	1.558	6	8724	WT
0	4185731	163319	2.73	6	29817	WT
0	4185860	135715	2.12	7	25850	WT
0	4190841	122245	2.534	6	12417	WT
0	4197051	140831	1.951	6	32360	WT
0	4197051	25878	1.887	6	17896	WT
0	4197051	24548	2.905	6	7154	WT
0	4197169	54516	1.569	6	18107	WT
1	4290180	13363	2.337	9	33587	WT
1	4290180	46378	2.969	7	19048	WT
1	4320685	46008	2.033	7	19026	WT
1	4320685	155238	2.629	12	32310	WT
1	4320685	32665	1.447	6	16482	WT
1	4326526	157140	2.187	7	33512	WT
1	4326526	137562	2.413	6	7517	WT
1	4326526	45666	2.446	7	19319	WT
1	4326526	148304	2.577	6	15295	WT
1	4326526	34421	1.749	10	32197	WT
1	4326526	136550	1.522	6	11448	WT
1	4326778	159599	1.474	6	7197	WT
0	4363031	132577	1.1	6	24892	WT
0	106000	63722	2.148	8	14477	WT
0	106000	157294	2.424	6	18037	WT
0	108967	48967	1.563	6	30314	WT
0	108967	148710	0.858	7	16320	WT
0	109438	69158	1.23	6	30789	WT
1	128053	19440	1.525	7	32687	WT
0	162223	125996	1.794	7	19559	WT
0	339916	51570	1.929	8	19714	WT
0	339916	157718	2.806	6	31227	WT
0	344343	157879	1.818	8	28843	WT
0	392247	72445	2.856	7	21306	WT
0	392376	67998	1.517	6	12332	WT
0	400906	34902	1.989	6	9581	WT
0	400906	125847	2.475	6	7560	WT
0	400906	122009	2.593	6	6671	WT
0	400906	142329	3.022	6	34488	WT
0	400906	138394	0.646	6	30946	WT
0	413777	161790	2.536	7	10863	WT
0	417177	77027	2	9	28196	WT
0	417177	62041	1.365	8	26444	WT
0	421897	135150	1.869	6	24181	WT
0	421897	143875	1.867	7	23182	WT
0	421897	75962	2.24	6	15849	WT
0	421897	44934	2.315	7	8804	WT
0	421897	25887	1.642	11	22695	WT
0	421897	20552	2.557	6	10973	WT
0	421897	16797	2.538	10	33194	WT
0	421897	146376	2.679	9	22743	WT
0	421897	83237	0.809	6	10204	WT
0	422039	133089	1.489	6	13524	WT
1	439468	71698	1.761	7	20856	WT
1	439468	3654	2.425	6	21865	WT
1	439468	4732	2.837	9	15206	WT
1	442974	91059	2.037	8	28687	WT
1	442974	115116	2.246	6	16415	WT
1	442974	52711	1.718	9	15991	WT
1	442974	4722	2.285	9	24832	WT
1	442974	137053	2.652	13	28901	WT
1	442974	77099	1.232	6	11557	WT
1	442974	27752	3.021	8	21653	WT
1	442974	75526	0.766	9	33426	WT
1	445160	60526	2.075	6	20956	WT
1	445160	74988	2.052	7	16013	WT
1	445160	91261	2.324	7	27103	WT
1	445160	52020	1.953	6	21365	WT
1	445160	142703	2.375	7	35484	WT
1	445160	20190	2.492	9	23536	WT
1	447581	62424	2.194	9	16993	WT
1	447581	28741	2.223	7	16971	WT
1	447581	139631	1.963	6	14281	WT
1	447581	129268	1.86	9	19120	WT
1	447581	8932	2.22	8	19013	WT
1	447581	67659	1.216	8	20189	WT
1	447581	42388	0.977	10	30719	WT
1	448358	115794	2.301	11	29305	WT
1	448358	90592	2.268	7	8337	WT
1	448358	125083	2.471	8	15714	WT
1	448358	130294	2.582	7	11226	WT
1	448358	85761	1.269	9	17874	WT
1	448358	77207	2.99	6	13360	WT
1	448358	71675	3.01	7	12123	WT
1	448358	13929	3.304	6	29867	WT
1	448358	68699	0.358	10	27875	WT
1	450399	109253	2.604	7	13612	WT
1	458045	128802	2.03	6	15446	WT
1	458045	152689	1.886	6	18388	WT
1	459806	113999	2.17	6	11336	WT
1	474815	140206	1.909	6	16355	WT
1	474815	132063	2.184	8	28311	WT
1	474815	31065	0.217	9	32369	WT
0	524380	45609	2.423	6	21220	WT
0	524380	63356	2.598	7	16599	WT
0	532586	118610	1.978	6	28520	WT
0	551758	155456	1.66	7	34783	WT
0	558562	46257	1.011	6	34162	WT
0	575506	29486	-0.268	6	17095	WT
1	635524	113693	2.722	6	19882	WT
1	641100	112185	2.419	6	19311	WT
1	641100	28998	2.293	6	15559	WT
1	641100	34353	2.054	8	23128	WT
1	641100	141777	2.141	6	11794	WT
1	641100	128398	2.574	6	12993	WT
1	641246	92071	1.548	8	11688	WT
1	643056	19275	2.174	9	33059	WT
1	643056	132662	2.13	6	7831	WT
1	643056	55962	2.398	7	20692	WT
1	643056	120455	1.495	6	17498	WT
1	643056	101753	3.267	12	20710	WT
0	684658	96178	1.819	7	31678	WT
0	744748	111945	2.206	6	10773	WT
0	744748	23505	1.976	6	20579	WT
0	744748	47720	3.184	6	13258	WT
0	744748	13555	3.517	6	28254	WT
0	747174	52850	1.615	7	23279	WT
0	750630	32013	2.206	7	20507	WT
0	750630	157115	2.412	9	22534	WT
0	750630	150639	2.782	8	20003	WT
0	750630	77561	1.338	7	23185	WT
0	750630	151960	3.146	6	17635	WT
0	757275	112813	1.928	9	23855	WT
[truncated: 34,775 more rows]
