# Supplementary material for: Drivers and sites of diversity in the DNA adenine methylomes of 93 Mycobacterium tuberculosis complex clinical isolates
Source: eLife. 2020 Oct 27;9:e58542. doi: 10.7554/eLife.58542 (PMC7591249; doi:10.7554/eLife.58542)
Supplement: Figure 3—source data 2. [file elife-58542-fig3-data2.csv]

strand	pos	mol	nat	N_nat	subread_len	gtype	activity
1	568969	119609	1.945	6	8049	WT	active
1	568969	137298	2.243	6	4364	WT	active
1	568969	154966	2.289	7	11188	WT	active
1	568969	62188	2.338	12	33233	WT	active
1	568969	26017	2.339	6	12892	WT	active
1	568969	2523	2.373	6	33061	WT	active
1	568969	9380	2.594	10	34477	WT	active
1	568969	140744	1.156	10	37334	WT	active
1	568969	37509	2.827	7	13391	WT	active
1	568969	84223	2.926	7	9092	WT	active
1	569804	6663	2.373	10	28780	WT	active
1	569804	82246	2.606	6	21832	WT	active
1	569804	16558	2.618	6	15717	WT	active
1	571683	118302	2.094	6	21190	WT	active
1	1238453	115456	1.971	6	23322	WT	active
1	1873516	40751	2.533	6	19879	WT	active
0	2673512	149422	1.721	8	27567	WT	active
0	2676151	687	2.21	10	29503	WT	active
0	2676151	24613	2.177	10	30329	WT	active
0	2676151	21723	1.991	6	13122	WT	active
0	3294389	49376	1.629	6	18281	WT	active
1	562863	56280	2.117	6	19500	WT	active
1	562863	47194	2.111	7	32546	WT	active
1	562863	67840	2.078	6	8521	WT	active
1	562863	75850	2.067	6	7981	WT	active
1	562863	142965	1.956	7	13106	WT	active
1	562863	103656	1.931	7	12913	WT	active
1	562863	25999	2.385	9	31522	WT	active
1	562863	61159	1.82	6	8424	WT	active
1	562863	126197	1.781	6	12295	WT	active
1	562863	92109	2.466	8	27439	WT	active
1	562863	103248	2.529	6	22407	WT	active
1	562863	52053	1.548	6	18864	WT	active
1	562863	84883	2.666	8	28495	WT	active
1	562863	21646	2.714	8	32746	WT	active
1	562863	100225	2.702	7	14377	WT	active
1	562863	145936	1.514	8	22355	WT	active
1	562863	87476	1.379	7	11356	WT	active
1	562863	137017	3.217	6	9720	WT	active
1	562863	50159	0.832	7	22662	WT	active
1	563698	124656	2.203	6	6466	WT	active
1	563698	54186	2.527	6	7461	WT	active
1	563809	113485	2.908	7	25398	WT	active
1	565577	51280	1.79	6	21627	WT	active
1	599794	115723	2.713	7	28291	WT	active
1	1231430	30818	2.6	7	22770	WT	active
1	1855836	133899	2.377	8	26024	WT	active
1	1871454	112955	2.508	6	20394	WT	active
0	2650644	157838	2.075	6	21914	WT	active
0	2650644	150745	1.812	7	17491	WT	active
0	2650644	107655	2.965	6	11439	WT	active
0	2653283	63183	2.434	6	16425	WT	active
1	561420	100212	2.114	9	39367	WT	active
1	561420	107644	2.086	12	33409	WT	active
1	561420	54591	2.319	6	22405	WT	active
1	561420	145100	2.418	6	11420	WT	active
1	561420	48897	2.384	6	7767	WT	active
1	561420	130584	1.863	7	15374	WT	active
1	561420	129826	1.793	6	33239	WT	active
1	561420	55836	2.57	7	26330	WT	active
1	561420	57789	2.716	8	22343	WT	active
1	561420	40699	1.577	7	7121	WT	active
1	561420	115803	2.806	6	28223	WT	active
1	561420	149822	1.399	6	5595	WT	active
1	561420	124195	3.086	7	8117	WT	active
1	562255	41085	2.345	6	13631	WT	active
1	562255	823	2.857	6	8811	WT	active
1	564134	46042	1.653	6	29430	WT	active
1	598355	23754	2.197	7	16418	WT	active
1	598355	48320	2.379	7	16669	WT	active
0	2646242	2928	2.275	9	24176	WT	active
0	2646242	113388	2.307	6	12674	WT	active
0	2646242	137088	2.157	7	10692	WT	active
0	2646242	151459	2.635	10	30866	WT	active
0	2646242	147804	2.675	6	22441	WT	active
0	2648881	28301	2.301	8	35938	WT	active
0	2648881	229	2.853	6	20538	WT	active
0	2648881	132004	3.091	6	18054	WT	active
0	2648881	90361	3.298	11	35216	WT	active
0	3257974	48020	1.483	8	30281	WT	active
0	3363653	104922	2.194	6	17508	WT	active
0	532316	103608	2.268	6	31046	WT	active
1	567935	73959	2.174	11	28734	WT	active
1	567935	30105	2.227	6	18838	WT	active
1	567935	102886	2.083	6	8044	WT	active
1	567935	104074	2.234	11	23243	WT	active
1	567935	86089	2.02	7	11326	WT	active
1	567935	40978	2.35	7	5480	WT	active
1	567935	92875	1.928	7	30632	WT	active
1	567935	15418	2.486	8	28554	WT	active
1	567935	31788	2.458	6	6966	WT	active
1	567935	42710	1.762	12	28433	WT	active
1	567935	97125	2.793	6	5933	WT	active
1	567935	83480	2.818	10	24036	WT	active
1	567935	29410	2.981	6	6587	WT	active
1	567935	106919	1.126	8	29462	WT	active
1	567935	123881	3.623	6	19347	WT	active
1	568770	81443	2.264	8	22637	WT	active
1	568770	3066	2.386	6	12690	WT	active
1	568770	157178	2.592	6	5552	WT	active
1	568770	123275	1.871	6	14856	WT	active
1	568881	147660	2.548	6	12548	WT	active
1	569448	38444	2.548	6	22392	WT	active
1	1864353	88876	2.295	6	19008	WT	active
0	2668696	106602	2.573	6	25751	WT	active
0	2668696	15214	2.736	7	27824	WT	active
0	2668696	150531	1.078	7	20527	WT	active
0	2671334	84583	2.041	6	10747	WT	active
0	2671334	45554	1.895	11	28560	WT	active
0	2671334	61164	1.734	6	7684	WT	active
0	2671334	81572	2.424	10	26772	WT	active
1	561509	78966	2.13	12	35418	WT	active
1	561509	87566	2.04	6	9963	WT	active
1	561509	160281	2.22	6	19428	WT	active
1	561509	5341	1.901	6	11574	WT	active
1	561509	144764	2.366	6	24765	WT	active
1	561509	7959	1.711	6	15440	WT	active
1	561509	145110	2.545	7	15253	WT	active
1	561509	84011	2.591	10	35214	WT	active
1	561509	133906	2.633	13	25581	WT	active
1	561509	11584	2.692	6	9830	WT	active
1	561509	115657	1.532	6	10785	WT	active
1	561509	56282	2.742	6	8356	WT	active
1	561509	131254	2.798	6	16613	WT	active
1	561509	47899	1.35	7	7674	WT	active
1	562344	118748	2.051	6	16939	WT	active
1	598440	37008	2.753	6	27771	WT	active
0	2649487	58321	2.502	7	13554	WT	active
0	2649487	140705	3.232	6	15040	WT	active
0	2652126	137049	2.156	6	16935	WT	active
0	2652126	82766	2.324	6	13615	WT	active
0	2652126	75630	1.854	6	15440	WT	active
0	2652126	24848	2.583	6	7998	WT	active
1	561481	83573	2.202	12	22705	WT	active
1	561481	100982	2.282	9	20966	WT	active
1	561481	1743	2.325	7	19225	WT	active
1	561481	77930	2.048	6	7936	WT	active
1	561481	69913	2.041	12	32409	WT	active
1	561481	114763	2.435	6	5689	WT	active
1	561481	23170	2.55	6	8005	WT	active
1	561481	63585	1.819	6	6852	WT	active
1	561481	83254	2.825	8	28969	WT	active
1	561481	136775	1.613	6	8474	WT	active
1	561481	123474	2.932	7	11124	WT	active
1	561481	103319	3.047	6	21004	WT	active
1	562316	62534	2.203	6	9446	WT	active
1	562316	159404	2.469	6	4590	WT	active
1	1210402	27946	2.648	7	30214	WT	active
0	2645433	138694	1.351	6	16372	WT	active
0	2645433	75537	3.054	6	9861	WT	active
0	2648072	86926	2.478	6	27248	WT	active
0	3364357	58122	2.474	6	14285	WT	active
0	3833979	11314	2.725	6	25103	WT	active
1	560775	102494	2.089	7	28270	WT	active
1	560775	90559	2.231	7	5380	WT	active
1	560775	127916	1.947	7	6632	WT	active
1	560775	121216	2.374	9	18772	WT	active
1	560775	125257	2.427	6	12650	WT	active
1	560775	84823	2.425	6	27787	WT	active
1	560775	7233	2.457	6	28323	WT	active
1	560775	79274	1.744	7	28281	WT	active
1	560775	66520	2.525	7	16214	WT	active
1	560775	12243	2.658	6	8708	WT	active
1	560775	85402	2.672	6	33042	WT	active
1	560775	69726	1.233	6	19167	WT	active
1	560775	120706	1.253	9	24335	WT	active
1	560775	148392	0.924	7	6558	WT	active
1	561610	151623	2.439	6	23588	WT	active
1	561610	140945	2.474	6	20142	WT	active
1	561610	161236	1.6	6	3861	WT	active
1	561721	142509	2.062	6	11276	WT	active
1	597711	130690	2.869	6	23516	WT	active
1	608509	105682	2.677	6	29832	WT	active
1	1706364	96760	2.121	6	31912	WT	active
1	1721326	114074	2.13	6	36439	WT	active
0	2649121	48284	1.982	8	25079	WT	active
0	2649121	103508	2.497	7	21750	WT	active
0	2651760	23032	1.849	6	7392	WT	active
0	3255772	4004	1.299	6	23685	WT	active
0	3262006	155479	2.42	6	27467	WT	active
1	4391226	155244	2.702	6	26700	WT	active
0	518571	80792	1.066	6	26719	WT	active
0	526496	136457	2.209	6	11637	WT	active
1	562125	158872	2.123	6	9517	WT	active
1	562125	101068	2.086	7	11261	WT	active
1	562125	132995	2.264	7	21843	WT	active
1	562125	27147	2.249	6	21103	WT	active
1	562125	113315	2.001	6	17502	WT	active
1	562125	9070	1.964	6	14173	WT	active
1	562125	134907	1.984	13	34527	WT	active
1	562125	149392	1.907	6	7635	WT	active
1	562125	34900	2.394	13	30073	WT	active
1	562125	136668	2.46	6	13257	WT	active
1	562125	144126	1.726	6	8898	WT	active
1	562125	111417	1.522	6	27722	WT	active
1	562125	88954	2.83	11	32991	WT	active
1	562125	89214	1.068	11	21192	WT	active
1	562960	115994	2.12	10	21128	WT	active
1	562960	134142	2.527	6	22834	WT	active
1	562960	128350	2.819	6	13591	WT	active
1	562960	81182	2.981	6	11616	WT	active
0	2650469	71669	2.365	7	22973	WT	active
0	2650469	7574	2.481	6	11444	WT	active
0	2650469	138622	3.259	7	29352	WT	active
0	2653108	84506	2.415	6	29330	WT	active
0	2653108	41785	2.461	9	27917	WT	active
0	2653108	108150	2.709	6	11515	WT	active
0	2653108	84309	2.948	6	9529	WT	active
0	3262044	33611	1.129	6	12036	WT	active
1	561545	56433	2.238	10	25570	WT	active
1	561545	149668	2.271	10	32508	WT	active
1	561545	76697	2.263	7	12302	WT	active
1	561545	94401	1.888	7	8535	WT	active
1	561545	53059	2.56	8	22862	WT	active
1	561545	159145	1.607	12	30919	WT	active
1	561545	2583	2.723	7	18363	WT	active
1	561545	84630	2.804	10	28025	WT	active
1	561545	103316	1.377	11	19888	WT	active
1	561545	126021	1.321	7	7844	WT	active
1	561545	6743	3.153	11	23545	WT	active
1	561545	125968	1.11	6	20916	WT	active
1	562380	140481	2.306	6	8332	WT	active
1	562380	97766	2.805	10	27029	WT	active
0	2642001	117250	3.022	7	11200	WT	active
0	2642001	62504	3.28	10	26467	WT	active
0	2644640	43269	2.173	6	18850	WT	active
0	2644640	146869	1.993	6	6893	WT	active
0	2644640	137058	2.781	8	30919	WT	active
0	2646715	132596	2.608	6	18966	WT	active
1	561412	25804	2.165	6	31409	WT	active
1	561412	24478	2.264	11	31164	WT	active
1	561412	57448	2.312	7	19497	WT	active
1	561412	26378	2.353	7	7959	WT	active
1	561412	118912	2	7	7349	WT	active
1	561412	22157	2.02	6	6247	WT	active
1	561412	9361	2.458	11	24911	WT	active
1	561412	45051	2.473	7	19499	WT	active
1	561412	16611	2.529	9	22507	WT	active
1	561412	13551	1.891	6	8243	WT	active
1	561412	135249	1.83	10	21445	WT	active
1	561412	64301	2.701	6	6584	WT	active
1	561412	79787	2.734	12	23031	WT	active
1	561412	156084	3.035	9	21169	WT	active
1	561412	45102	1.259	6	14051	WT	active
1	562247	65500	2.181	10	20782	WT	active
1	562247	62420	2.077	9	16880	WT	active
1	562247	143343	2.039	6	9750	WT	active
1	562247	72440	1.962	7	13388	WT	active
1	598406	149328	2.657	6	15049	WT	active
1	598406	104482	1.98	7	26302	WT	active
0	2644558	90644	2.55	7	31705	WT	active
0	2644558	158949	2.948	10	24864	WT	active
0	2647197	5291	2.234	6	14905	WT	active
0	2647197	70249	2.689	6	13407	WT	active
0	2647197	89309	1.2	15	29879	WT	active
0	2647197	5050	3.142	6	18394	WT	active
0	2712936	55509	2.513	6	20396	WT	active
1	566212	157691	2.179	6	15066	WT	active
1	566212	122083	2.219	20	24341	WT	active
1	566212	87831	2.439	6	4785	WT	active
1	566212	155897	2.54	10	19649	WT	active
1	566212	143877	1.648	6	12216	WT	active
1	566212	108006	1.646	14	29400	WT	active
1	566212	151070	2.869	8	22880	WT	active
1	566212	29616	1.522	6	20861	WT	active
1	566212	140445	2.849	6	15711	WT	active
1	566212	158002	1.43	6	14063	WT	active
1	566212	135656	1.395	6	21828	WT	active
1	566212	176655	1.042	7	9356	WT	active
1	567047	69898	2.202	6	4701	WT	active
1	567047	90076	2.266	11	24577	WT	active
1	567047	47561	2.298	8	15899	WT	active
1	567047	155511	1.989	11	18242	WT	active
1	567047	100517	1.639	6	8025	WT	active
1	2448893	198728	1.879	6	23553	WT	active
0	2620824	91447	2.453	10	21654	WT	active
0	2652327	72686	2.496	10	22318	WT	active
0	2654966	143377	2.052	6	11662	WT	active
0	2654966	98418	1.945	6	6091	WT	active
0	2657041	83890	2.023	6	20707	WT	active
0	2725082	105319	2.889	6	19375	WT	active
0	3269446	116637	2.383	6	15166	WT	active
0	525806	12955	2.113	6	26885	WT	active
0	525806	2277	2.11	7	25411	WT	active
1	561434	50906	2.262	8	25482	WT	active
1	561434	124250	2.099	10	26953	WT	active
1	561434	10678	1.972	7	20451	WT	active
1	561434	161445	2.062	6	12435	WT	active
1	561434	57876	1.935	10	36340	WT	active
1	561434	55189	2.564	6	11812	WT	active
1	561434	34668	2.565	8	24495	WT	active
1	561434	41666	2.583	6	12183	WT	active
1	561434	124528	2.604	7	26903	WT	active
1	561434	81548	2.689	6	13967	WT	active
1	561434	17552	2.784	7	15069	WT	active
1	561434	14039	3.179	10	26968	WT	active
1	562269	120621	1.728	6	12034	WT	active
1	562269	156216	1.663	6	9280	WT	active
1	562269	47168	2.899	6	17602	WT	active
1	562269	97227	3.155	6	33140	WT	active
0	2425895	132910	2.329	13	29844	WT	active
0	2425895	58524	1.973	6	19614	WT	active
0	2425895	41010	1.738	6	24888	WT	active
0	2425895	78375	2.699	6	30534	WT	active
0	2428534	24906	2.683	6	31126	WT	active
0	522377	116936	2.163	6	29022	WT	active
1	569136	146743	1.972	7	9440	WT	active
1	569136	81992	2.141	10	26984	WT	active
1	569136	107838	2.137	6	6078	WT	active
1	569136	78134	1.58	11	26123	WT	active
1	569136	42186	2.352	6	16024	WT	active
1	569136	144770	2.553	6	14120	WT	active
1	569136	38661	1.487	10	23907	WT	active
1	569136	134731	2.508	7	8591	WT	active
1	569136	56369	1.234	7	9270	WT	active
1	569136	58982	2.776	7	7202	WT	active
1	569136	18940	0.651	7	24562	WT	active
1	569136	137107	3.298	6	27841	WT	active
1	569971	117394	2.402	7	18992	WT	active
1	569971	125980	2.8	6	15280	WT	active
1	570649	51310	2.422	6	17254	WT	active
1	571850	83332	2.403	6	12970	WT	active
0	2677151	134462	2.706	6	28542	WT	active
0	2677151	134499	2.87	6	28657	WT	active
0	3286504	146336	1.188	7	33118	WT	active
0	528835	95896	1.984	6	17097	WT	active
1	564464	64047	2.415	10	15722	WT	active
1	564464	80065	2.214	13	24403	WT	active
1	564464	56134	2.519	7	20015	WT	active
1	564464	155894	2.539	9	30958	WT	active
1	564464	70759	2.542	7	29030	WT	active
1	564464	83763	2.017	11	31468	WT	active
1	564464	124135	2.804	7	6466	WT	active
1	564464	133609	1.715	6	7602	WT	active
1	564464	50886	3.272	6	15241	WT	active
1	564464	38543	3.315	6	5558	WT	active
1	565299	105281	1.871	6	11642	WT	active
1	565299	119206	1.535	6	6982	WT	active
1	565299	104509	3.145	8	26974	WT	active
1	565299	51305	1.386	6	11023	WT	active
0	2652847	2212	2.429	6	18889	WT	active
0	2652847	2017	1.763	6	12838	WT	active
0	2652847	37552	2.958	7	16666	WT	active
0	2652847	155849	0.917	6	10817	WT	active
0	2655486	130668	2.611	6	7242	WT	active
0	2655486	59793	1.628	6	13600	WT	active
0	2657561	161041	2.439	6	22565	WT	active
0	2657561	159676	3.44	6	17247	WT	active
0	3269957	38938	1.782	6	16981	WT	active
0	533389	135334	2.115	6	19927	WT	active
1	551194	119267	1.893	8	28709	WT	active
1	566256	74002	2.372	6	12073	WT	active
1	566256	99811	2.393	7	22534	WT	active
1	566256	125611	2.15	8	14241	WT	active
1	566256	13592	2.499	6	11352	WT	active
1	566256	1808	2.045	6	25567	WT	active
1	566256	19312	2.633	6	13367	WT	active
1	566256	135805	1.854	7	17770	WT	active
1	566256	127518	2.755	11	27092	WT	active
1	566256	12214	1.774	9	20592	WT	active
1	566256	68620	1.713	7	20956	WT	active
1	566256	147298	3.02	9	33630	WT	active
1	566256	142364	1.386	7	6161	WT	active
1	566256	73132	3.294	6	13791	WT	active
1	566256	52728	1.245	7	10549	WT	active
1	567091	93896	2.423	6	15322	WT	active
1	567091	53615	2.895	6	11339	WT	active
1	603192	43205	2.779	7	13699	WT	active
1	603192	100983	1.213	6	31192	WT	active
1	1226931	57738	1.888	7	21537	WT	active
1	1226931	107015	1.99	6	27697	WT	active
1	1853616	42529	1.588	7	27950	WT	active
1	1856884	12648	2.518	7	22116	WT	active
1	1859695	13753	2.859	6	15164	WT	active
0	2640416	58469	2.786	7	25297	WT	active
0	2643055	104111	2.284	6	14219	WT	active
0	2643055	143215	2.038	8	21616	WT	active
0	2643055	91862	2.548	6	18886	WT	active
0	2643055	109258	2.722	6	12931	WT	active
0	2643055	43464	2.946	7	21321	WT	active
0	3249732	7681	2.017	6	22570	WT	active
0	3872162	159833	1.886	6	28135	WT	active
0	525808	27608	1.788	6	18288	WT	active
0	525808	156066	1.772	6	20469	WT	active
1	561437	67156	2.029	10	30072	WT	active
1	561437	154111	2.192	6	32583	WT	active
1	561437	40693	2.454	6	22333	WT	active
1	561437	47135	1.534	12	33378	WT	active
1	561437	84354	2.592	7	10658	WT	active
1	561437	147587	2.665	7	7750	WT	active
1	561437	128809	1.301	7	18685	WT	active
1	561437	78815	1.173	6	9145	WT	active
1	561437	20605	1.067	6	7561	WT	active
1	561437	118766	0.964	9	29523	WT	active
1	562272	28781	2.324	6	10369	WT	active
1	562272	6313	2.649	7	20142	WT	active
1	562272	32379	1.226	6	6997	WT	active
1	609171	88853	1.573	7	25703	WT	active
0	2425888	116893	2.234	6	18363	WT	active
0	2425888	24940	2.305	6	18034	WT	active
0	2425888	139616	2.725	11	30506	WT	active
0	2428527	145691	2.136	6	10910	WT	active
0	2428527	120895	1.525	9	31321	WT	active
0	2499289	10252	2.09	6	28596	WT	active
1	567614	42787	0.237	7	22874	K1033T	barely active
1	567614	121936	0.815	6	12569	K1033T	barely active
1	567614	56526	0.233	6	11868	K1033T	barely active
1	567614	116119	0.309	7	28560	K1033T	barely active
1	567614	56940	-0.047	6	10459	K1033T	barely active
1	567614	28733	-0.102	6	15194	K1033T	barely active
1	567614	102034	1.213	7	7603	K1033T	barely active
1	567614	145820	-0.122	7	6881	K1033T	barely active
1	567614	155253	1.505	6	6666	K1033T	barely active
1	567614	138949	1.715	6	21770	K1033T	barely active
1	567614	125756	1.624	7	22955	K1033T	barely active
1	567614	150994	-0.519	6	11556	K1033T	barely active
1	567614	66315	-0.651	6	17107	K1033T	barely active
1	567614	91896	-0.542	6	14332	K1033T	barely active
1	567614	65915	1.924	7	8754	K1033T	barely active
1	567614	110165	-1.361	6	6218	K1033T	barely active
1	567614	57577	-1.81	6	9391	K1033T	barely active
1	568449	117970	0.841	6	27839	K1033T	barely active
0	2587915	84767	-0.191	6	31228	K1033T	barely active
0	2654472	116724	-0.141	6	22742	K1033T	barely active
0	2654472	132591	0.496	6	27396	K1033T	barely active
0	2657111	140392	-0.048	6	7115	K1033T	barely active
0	2657111	162221	1.094	6	7959	K1033T	barely active
0	3274552	119497	0.101	6	24787	K1033T	barely active
0	3274552	34895	0.304	6	25018	K1033T	barely active
0	3274552	134095	1.396	6	20659	K1033T	barely active
0	524761	158394	-1.358	6	18620	DEL_507-1606	inactive
1	560390	20529	-0.019	6	25159	DEL_507-1606	inactive
1	560390	138141	0.015	7	10584	DEL_507-1606	inactive
1	560390	137971	-0.195	6	18304	DEL_507-1606	inactive
1	560390	47971	-0.255	7	11513	DEL_507-1606	inactive
1	560390	104322	-0.292	12	33470	DEL_507-1606	inactive
1	560390	6250	0.173	7	11491	DEL_507-1606	inactive
1	560390	67777	0.223	13	23426	DEL_507-1606	inactive
1	560390	104447	-0.51	6	13507	DEL_507-1606	inactive
1	560390	151367	0.374	6	11774	DEL_507-1606	inactive
1	560390	32048	0.531	6	8995	DEL_507-1606	inactive
1	560390	54258	0.468	9	29661	DEL_507-1606	inactive
1	560390	4929	0.731	6	4974	DEL_507-1606	inactive
1	561225	18757	-0.658	6	6546	DEL_507-1606	inactive
1	561225	79688	0.847	6	17958	DEL_507-1606	inactive
1	563104	98265	-1.792	6	23105	DEL_507-1606	inactive
0	2632911	134364	0.243	7	12426	DEL_507-1606	inactive
0	2632911	107589	0.246	6	19025	DEL_507-1606	inactive
0	2632911	69746	-0.452	6	10252	DEL_507-1606	inactive
0	2635550	44372	0.55	6	17759	DEL_507-1606	inactive
0	2635550	54608	0.956	6	10911	DEL_507-1606	inactive
0	2705648	46609	-1.4	7	20567	DEL_507-1606	inactive
0	3251720	24579	0.002	6	30043	DEL_507-1606	inactive
1	569016	130282	-0.236	7	5892	D59G,V616A,INS_1131-1583	inactive
1	569016	73378	-0.313	7	23880	D59G,V616A,INS_1131-1583	inactive
1	569016	12422	-0.174	9	23465	D59G,V616A,INS_1131-1583	inactive
1	569016	76585	-0.097	6	22132	D59G,V616A,INS_1131-1583	inactive
1	569016	40581	-0.389	6	15435	D59G,V616A,INS_1131-1583	inactive
1	569016	135923	-0.119	6	7603	D59G,V616A,INS_1131-1583	inactive
1	569016	81020	-0.484	19	36937	D59G,V616A,INS_1131-1583	inactive
1	569016	142681	-0.501	6	10165	D59G,V616A,INS_1131-1583	inactive
1	569016	47132	0.039	6	9586	D59G,V616A,INS_1131-1583	inactive
1	569016	66350	-0.827	7	12430	D59G,V616A,INS_1131-1583	inactive
1	569016	130575	-1.124	7	29581	D59G,V616A,INS_1131-1583	inactive
1	569016	36943	0.753	6	29837	D59G,V616A,INS_1131-1583	inactive
1	569016	34576	-1.661	10	33441	D59G,V616A,INS_1131-1583	inactive
1	569851	71803	-0.369	6	21829	D59G,V616A,INS_1131-1583	inactive
1	569851	122083	0.16	8	24761	D59G,V616A,INS_1131-1583	inactive
1	569851	51124	-0.628	6	19291	D59G,V616A,INS_1131-1583	inactive
1	569851	75732	0.314	6	7896	D59G,V616A,INS_1131-1583	inactive
1	569851	15372	0.441	11	34080	D59G,V616A,INS_1131-1583	inactive
0	2666465	34360	-0.001	6	11684	D59G,V616A,INS_1131-1583	inactive
0	2666465	83216	0.316	8	30395	D59G,V616A,INS_1131-1583	inactive
0	2669104	38179	-0.451	6	8893	D59G,V616A,INS_1131-1583	inactive
0	2669104	48920	-0.712	6	6794	D59G,V616A,INS_1131-1583	inactive
0	2669104	108499	-0.906	6	11670	D59G,V616A,INS_1131-1583	inactive
0	2669104	66936	0.815	6	27857	D59G,V616A,INS_1131-1583	inactive
0	2669104	138465	0.941	6	8150	D59G,V616A,INS_1131-1583	inactive
0	3287238	61571	0.686	6	21193	D59G,V616A,INS_1131-1583	inactive
0	3387015	16982	0.141	6	29677	D59G,V616A,INS_1131-1583	inactive
1	559381	209950	-0.347	7	25751	D59G,V616A,INS_1131-1583	inactive
1	559381	41997	-0.361	14	25293	D59G,V616A,INS_1131-1583	inactive
1	559381	32873	-0.193	7	17408	D59G,V616A,INS_1131-1583	inactive
1	559381	107977	-0.166	6	13123	D59G,V616A,INS_1131-1583	inactive
1	559381	161541	-0.462	11	22055	D59G,V616A,INS_1131-1583	inactive
1	559381	134776	-0.538	6	7259	D59G,V616A,INS_1131-1583	inactive
1	559381	63762	-0.516	11	21472	D59G,V616A,INS_1131-1583	inactive
1	559381	125231	-0.067	9	18178	D59G,V616A,INS_1131-1583	inactive
1	559381	157385	-0.63	13	23936	D59G,V616A,INS_1131-1583	inactive
1	559381	137030	0.001	6	10106	D59G,V616A,INS_1131-1583	inactive
1	559381	127476	0.179	6	10819	D59G,V616A,INS_1131-1583	inactive
1	559381	144769	-0.802	6	21276	D59G,V616A,INS_1131-1583	inactive
1	559381	126173	0.225	6	15029	D59G,V616A,INS_1131-1583	inactive
1	559381	132633	0.264	9	23914	D59G,V616A,INS_1131-1583	inactive
1	559381	113269	0.344	10	15755	D59G,V616A,INS_1131-1583	inactive
1	559381	11048	0.501	6	6194	D59G,V616A,INS_1131-1583	inactive
1	559381	70198	0.667	6	12425	D59G,V616A,INS_1131-1583	inactive
1	559381	248828	-1.384	6	14834	D59G,V616A,INS_1131-1583	inactive
1	559381	74857	-1.843	7	19065	D59G,V616A,INS_1131-1583	inactive
1	559381	9897	-2.039	6	15964	D59G,V616A,INS_1131-1583	inactive
1	560216	76872	-1.487	6	16393	D59G,V616A,INS_1131-1583	inactive
1	560216	264029	-1.683	6	21257	D59G,V616A,INS_1131-1583	inactive
0	2647022	217181	-0.441	6	10946	D59G,V616A,INS_1131-1583	inactive
0	2647022	147084	0.323	6	17555	D59G,V616A,INS_1131-1583	inactive
0	2649661	216329	0.041	6	20134	D59G,V616A,INS_1131-1583	inactive
0	2649661	174892	-0.348	6	16014	D59G,V616A,INS_1131-1583	inactive
0	2649661	29853	-1.672	6	13341	D59G,V616A,INS_1131-1583	inactive
0	525784	84847	-0.017	6	11968	DEL_507-1606	inactive
0	525784	46933	0.054	6	28602	DEL_507-1606	inactive
1	561411	92410	-0.381	6	5761	DEL_507-1606	inactive
1	561411	91500	-0.121	6	6054	DEL_507-1606	inactive
1	561411	71029	-0.206	6	13507	DEL_507-1606	inactive
1	561411	36014	-0.036	6	11986	DEL_507-1606	inactive
1	561411	66089	-0.462	10	27165	DEL_507-1606	inactive
1	561411	84195	0.262	7	17449	DEL_507-1606	inactive
1	561411	132993	0.273	7	9758	DEL_507-1606	inactive
1	561411	147388	0.233	8	31970	DEL_507-1606	inactive
1	561411	14490	0.307	11	21190	DEL_507-1606	inactive
1	561411	158709	-0.571	6	5880	DEL_507-1606	inactive
1	561411	31751	-0.694	6	7173	DEL_507-1606	inactive
1	561411	25755	-1.577	7	13053	DEL_507-1606	inactive
1	562246	135471	-0.249	6	21910	DEL_507-1606	inactive
1	562246	81757	0.125	6	19856	DEL_507-1606	inactive
1	562246	128240	0.147	6	24803	DEL_507-1606	inactive
1	598287	148685	-0.606	6	18915	DEL_507-1606	inactive
1	609085	19879	-0.54	6	22651	DEL_507-1606	inactive
1	1865501	137628	-0.034	6	19465	DEL_507-1606	inactive
1	1865501	113575	-0.672	6	15851	DEL_507-1606	inactive
0	2652618	77145	-0.224	6	17286	DEL_507-1606	inactive
0	2655257	135777	0.375	6	19885	DEL_507-1606	inactive
1	568570	155684	-0.132	6	10846	V616A,H770N	inactive
1	568570	48972	-0.32	8	22416	V616A,H770N	inactive
1	568570	102643	0.454	6	22939	V616A,H770N	inactive
1	568570	87923	-0.474	7	18989	V616A,H770N	inactive
1	568570	132624	0.363	7	10336	V616A,H770N	inactive
1	568570	132635	-0.485	7	6863	V616A,H770N	inactive
1	568570	25007	0.301	6	13338	V616A,H770N	inactive
1	568570	146170	-0.626	6	17549	V616A,H770N	inactive
1	568570	19166	-0.579	6	25450	V616A,H770N	inactive
1	568570	135570	-0.639	7	10239	V616A,H770N	inactive
1	568570	141871	0.605	7	11749	V616A,H770N	inactive
1	568570	154996	-0.759	10	30771	V616A,H770N	inactive
1	568570	57987	0.709	6	9702	V616A,H770N	inactive
1	568570	158950	0.778	6	7949	V616A,H770N	inactive
1	568570	113871	-1.793	6	17979	V616A,H770N	inactive
1	605927	309	-0.849	6	25959	V616A,H770N	inactive
1	616725	150543	-1.049	6	21974	V616A,H770N	inactive
0	2601778	151269	-0.377	7	23676	V616A,H770N	inactive
0	2666799	33908	0.243	10	34495	V616A,H770N	inactive
0	2669438	81590	-0.541	6	12047	V616A,H770N	inactive
