# Supplementary material for: Drivers and sites of diversity in the DNA adenine methylomes of 93 Mycobacterium tuberculosis complex clinical isolates
Source: eLife. 2020 Oct 27;9:e58542. doi: 10.7554/eLife.58542 (PMC7591249; doi:10.7554/eLife.58542)
Supplement: Figure 4—source data 1. [file elife-58542-fig4-data1.csv]

Isolate	Lineage	RefLoci	logIPD_adj
1-0006	East-Asian	antisense_dnaA_520_to_stop	0.163405391051308
1-0009	East-Asian	antisense_dnaA_520_to_stop	0.273766723782603
1-0013	East-Asian	antisense_dnaA_520_to_stop	2.79236503716806
1-0017	East-Asian	antisense_dnaA_520_to_stop	0.85424764594022
1-0021	East-African-Indian	antisense_dnaA_520_to_stop	2.79236503716806
1-0028	East-Asian	antisense_dnaA_520_to_stop	0.358165971533642
1-0030	Indo-Oceanic	antisense_dnaA_520_to_stop	2.79236503716806
1-0031	East-Asian	antisense_dnaA_520_to_stop	0
1-0036	Euro-American	antisense_dnaA_520_to_stop	2.79236503716806
1-0039	East-Asian	antisense_dnaA_520_to_stop	0
1-0044	Euro-American	antisense_dnaA_520_to_stop	2.79236503716806
1-0045	East-Asian	antisense_dnaA_520_to_stop	0
1-0047	East-African-Indian	antisense_dnaA_520_to_stop	2.79236503716806
1-0054	East-Asian	antisense_dnaA_520_to_stop	0.0516476937098469
1-0056	East-Asian	antisense_dnaA_520_to_stop	0.471984558766066
1-0061	Indo-Oceanic	antisense_dnaA_520_to_stop	2.79236503716806
1-0064	East-Asian	antisense_dnaA_520_to_stop	0.154078864196666
1-0066	East-Asian	antisense_dnaA_520_to_stop	0.641992039657055
1-0069	East-Asian	antisense_dnaA_520_to_stop	0.193385005383997
1-0071	East-Asian	antisense_dnaA_520_to_stop	0.604799819932986
1-0084	East-Asian	antisense_dnaA_520_to_stop	0
1-0102	East-Asian	antisense_dnaA_520_to_stop	0.362243861660613
1-0107	East-African-Indian	antisense_dnaA_520_to_stop	2.79236503716806
1-0110	East-Asian	antisense_dnaA_520_to_stop	0
1-0112	East-Asian	antisense_dnaA_520_to_stop	0
1-0116	East-Asian	antisense_dnaA_520_to_stop	0.280149650031092
1-0123	East-Asian	antisense_dnaA_520_to_stop	0.231874084049834
1-0137	East-Asian	antisense_dnaA_520_to_stop	0.201231666851503
1-0149	East-Asian	antisense_dnaA_520_to_stop	0
1-0150	East-Asian	antisense_dnaA_520_to_stop	0.0411146242381229
1-0153	East-Asian	antisense_dnaA_520_to_stop	0
1-0156	Euro-American	antisense_dnaA_520_to_stop	2.01574568726179
2-0013	East-Asian	antisense_dnaA_520_to_stop	0.453154345031428
2-0021	Euro-American	antisense_dnaA_520_to_stop	2.79236503716806
2-0022	Euro-American	antisense_dnaA_520_to_stop	2.71030416599407
2-0023	Euro-American	antisense_dnaA_520_to_stop	2.50575026482872
2-0028	Euro-American	antisense_dnaA_520_to_stop	2.79236503716806
2-0029	Euro-American	antisense_dnaA_520_to_stop	2.79236503716806
2-0034	East-Asian	antisense_dnaA_520_to_stop	0
2-0043-unknown	Euro-American	antisense_dnaA_520_to_stop	2.74567713036221
2-0046	Euro-American	antisense_dnaA_520_to_stop	2.79236503716806
2-0052	East-Asian	antisense_dnaA_520_to_stop	0.0224513367112707
2-0068	East-Asian	antisense_dnaA_520_to_stop	0
2-0111	Euro-American	antisense_dnaA_520_to_stop	2.79236503716806
3-0059	Euro-American	antisense_dnaA_520_to_stop	2.79236503716806
3-0090	Indo-Oceanic	antisense_dnaA_520_to_stop	0
3-0096	Indo-Oceanic	antisense_dnaA_520_to_stop	0
3-0124	Indo-Oceanic	antisense_dnaA_520_to_stop	0.137590838577417
4-0012	Euro-American	antisense_dnaA_520_to_stop	2.79236503716806
4-0062	East-Asian	antisense_dnaA_520_to_stop	0.203613137429434
4-0073	Euro-American	antisense_dnaA_520_to_stop	2.02725675446296
4-0077	East-Asian	antisense_dnaA_520_to_stop	0.00770164876674282
4-0087	Euro-American	antisense_dnaA_520_to_stop	2.79236503716806
4-0096	East-Asian	antisense_dnaA_520_to_stop	0.593899157720941
N0054	East-African-Indian	antisense_dnaA_520_to_stop	2.79236503716806
N0091	M. africanum	antisense_dnaA_520_to_stop	2.79236503716806
N0153	Indo-Oceanic	antisense_dnaA_520_to_stop	2.79236503716806
N0157	Indo-Oceanic	antisense_dnaA_520_to_stop	0
N1063	M. africanum	antisense_dnaA_520_to_stop	2.79236503716806
N1176	M. africanum	antisense_dnaA_520_to_stop	2.79236503716806
N1216	Euro-American	antisense_dnaA_520_to_stop	2.79236503716806
SEA00042	Euro-American	antisense_dnaA_520_to_stop	2.7701921851334
SEA06535	Euro-American	antisense_dnaA_520_to_stop	2.79236503716806
SEA07010354	East-African-Indian	antisense_dnaA_520_to_stop	2.72183030208439
SEA07020250	Euro-American	antisense_dnaA_520_to_stop	0.566923654933286
SEA08151	Indo-Oceanic	antisense_dnaA_520_to_stop	2.79236503716806
SEA09020048	Euro-American	antisense_dnaA_520_to_stop	2.79236503716806
SEA09167	Euro-American	antisense_dnaA_520_to_stop	2.58196142942482
SEA11020038	Euro-American	antisense_dnaA_520_to_stop	2.79236503716806
SEA11020057	Euro-American	antisense_dnaA_520_to_stop	2.76046117579796
SEA11020068	Euro-American	antisense_dnaA_520_to_stop	2.79236503716806
SEA11020092	Euro-American	antisense_dnaA_520_to_stop	2.79236503716806
SEA11278	Lineage 7	antisense_dnaA_520_to_stop	2.79236503716806
SEA12126	Indo-Oceanic	antisense_dnaA_520_to_stop	2.79236503716806
SEA12202	Indo-Oceanic	antisense_dnaA_520_to_stop	2.69223575298439
SEA12334	Indo-Oceanic	antisense_dnaA_520_to_stop	2.79236503716806
SEA13111	Indo-Oceanic	antisense_dnaA_520_to_stop	2.79236503716806
SEA14117	East-Asian	antisense_dnaA_520_to_stop	2.79236503716806
SEA14333	Indo-Oceanic	antisense_dnaA_520_to_stop	2.79236503716806
SEA15228	Indo-Oceanic	antisense_dnaA_520_to_stop	2.79236503716806
SEA15229	Indo-Oceanic	antisense_dnaA_520_to_stop	2.79236503716806
SEA15230	Indo-Oceanic	antisense_dnaA_520_to_stop	2.60298761414914
SEA17020023	Indo-Oceanic	antisense_dnaA_520_to_stop	2.74678945062178
SEA17020024	Indo-Oceanic	antisense_dnaA_520_to_stop	2.77993647000706
SEA17020028	East-Asian	antisense_dnaA_520_to_stop	0
SEA17020030	Euro-American	antisense_dnaA_520_to_stop	2.57466588920051
1-0006	East-Asian	sense_dnaA_517_to_stop	0.443825852498491
1-0009	East-Asian	sense_dnaA_517_to_stop	0.940862672340621
1-0013	East-Asian	sense_dnaA_517_to_stop	2.79236503716806
1-0017	East-Asian	sense_dnaA_517_to_stop	0.328859878577435
1-0021	East-African-Indian	sense_dnaA_517_to_stop	2.39871262644323
1-0028	East-Asian	sense_dnaA_517_to_stop	0.38071781352349
1-0030	Indo-Oceanic	sense_dnaA_517_to_stop	2.708173803291
1-0031	East-Asian	sense_dnaA_517_to_stop	0.890349293281929
1-0036	Euro-American	sense_dnaA_517_to_stop	2.63936913719724
1-0039	East-Asian	sense_dnaA_517_to_stop	0.429616313338276
1-0044	Euro-American	sense_dnaA_517_to_stop	2.34082596946286
1-0045	East-Asian	sense_dnaA_517_to_stop	0.00898931312921766
1-0047	East-African-Indian	sense_dnaA_517_to_stop	2.79236503716806
1-0054	East-Asian	sense_dnaA_517_to_stop	0.173825486230946
1-0056	East-Asian	sense_dnaA_517_to_stop	0.32275854999159
1-0061	Indo-Oceanic	sense_dnaA_517_to_stop	2.54104546966381
1-0064	East-Asian	sense_dnaA_517_to_stop	0.313337773644515
1-0066	East-Asian	sense_dnaA_517_to_stop	0.448932771068944
1-0069	East-Asian	sense_dnaA_517_to_stop	0.295325393885217
1-0071	East-Asian	sense_dnaA_517_to_stop	0.85872225635144
1-0084	East-Asian	sense_dnaA_517_to_stop	0.0306856593478009
1-0102	East-Asian	sense_dnaA_517_to_stop	0
1-0107	East-African-Indian	sense_dnaA_517_to_stop	2.79236503716806
1-0110	East-Asian	sense_dnaA_517_to_stop	0
1-0112	East-Asian	sense_dnaA_517_to_stop	0
1-0116	East-Asian	sense_dnaA_517_to_stop	0.252668913608985
1-0123	East-Asian	sense_dnaA_517_to_stop	0.178335657158661
1-0137	East-Asian	sense_dnaA_517_to_stop	0.451090683937564
1-0149	East-Asian	sense_dnaA_517_to_stop	0.353092342723204
1-0150	East-Asian	sense_dnaA_517_to_stop	0.75203472627512
1-0153	East-Asian	sense_dnaA_517_to_stop	0
1-0156	Euro-American	sense_dnaA_517_to_stop	2.52397151347848
2-0013	East-Asian	sense_dnaA_517_to_stop	0.554068539936284
2-0021	Euro-American	sense_dnaA_517_to_stop	2.75361129871063
2-0022	Euro-American	sense_dnaA_517_to_stop	2.71806883227009
2-0023	Euro-American	sense_dnaA_517_to_stop	2.56642849339713
2-0028	Euro-American	sense_dnaA_517_to_stop	2.79236503716806
2-0029	Euro-American	sense_dnaA_517_to_stop	2.65941071591354
2-0034	East-Asian	sense_dnaA_517_to_stop	0.195610662277638
2-0043-unknown	Euro-American	sense_dnaA_517_to_stop	2.77003359199192
2-0046	Euro-American	sense_dnaA_517_to_stop	2.79236503716806
2-0052	East-Asian	sense_dnaA_517_to_stop	0.108833227187341
2-0068	East-Asian	sense_dnaA_517_to_stop	0.341769711628244
2-0111	Euro-American	sense_dnaA_517_to_stop	2.79236503716806
3-0059	Euro-American	sense_dnaA_517_to_stop	2.79236503716806
3-0090	Indo-Oceanic	sense_dnaA_517_to_stop	0.0974053503190029
3-0096	Indo-Oceanic	sense_dnaA_517_to_stop	0.0176745806224513
3-0124	Indo-Oceanic	sense_dnaA_517_to_stop	0
4-0012	Euro-American	sense_dnaA_517_to_stop	2.67059506144615
4-0062	East-Asian	sense_dnaA_517_to_stop	0.383884146959937
4-0073	Euro-American	sense_dnaA_517_to_stop	2.79236503716806
4-0077	East-Asian	sense_dnaA_517_to_stop	0.345220356096084
4-0087	Euro-American	sense_dnaA_517_to_stop	2.74840936352934
4-0096	East-Asian	sense_dnaA_517_to_stop	0.572696844990873
N0054	East-African-Indian	sense_dnaA_517_to_stop	2.79236503716806
N0091	M. africanum	sense_dnaA_517_to_stop	2.66357505675966
N0153	Indo-Oceanic	sense_dnaA_517_to_stop	2.79236503716806
N0157	Indo-Oceanic	sense_dnaA_517_to_stop	0
N1063	M. africanum	sense_dnaA_517_to_stop	2.79236503716806
N1176	M. africanum	sense_dnaA_517_to_stop	2.79236503716806
N1216	Euro-American	sense_dnaA_517_to_stop	2.79236503716806
SEA00042	Euro-American	sense_dnaA_517_to_stop	2.45454440411768
SEA06535	Euro-American	sense_dnaA_517_to_stop	2.64990181711178
SEA07010354	East-African-Indian	sense_dnaA_517_to_stop	2.79236503716806
SEA07020250	Euro-American	sense_dnaA_517_to_stop	0.577872065841761
SEA08151	Indo-Oceanic	sense_dnaA_517_to_stop	2.77538943171328
SEA09020048	Euro-American	sense_dnaA_517_to_stop	2.79236503716806
SEA09167	Euro-American	sense_dnaA_517_to_stop	2.79236503716806
SEA11020038	Euro-American	sense_dnaA_517_to_stop	2.77999523368905
SEA11020057	Euro-American	sense_dnaA_517_to_stop	2.79236503716806
SEA11020068	Euro-American	sense_dnaA_517_to_stop	2.75847630292759
SEA11020092	Euro-American	sense_dnaA_517_to_stop	2.79236503716806
SEA11278	Lineage 7	sense_dnaA_517_to_stop	2.79236503716806
SEA12126	Indo-Oceanic	sense_dnaA_517_to_stop	2.79236503716806
SEA12202	Indo-Oceanic	sense_dnaA_517_to_stop	2.79236503716806
SEA12334	Indo-Oceanic	sense_dnaA_517_to_stop	2.79236503716806
SEA13111	Indo-Oceanic	sense_dnaA_517_to_stop	2.1881322088653
SEA14117	East-Asian	sense_dnaA_517_to_stop	2.63603390482068
SEA14333	Indo-Oceanic	sense_dnaA_517_to_stop	2.79236503716806
SEA15228	Indo-Oceanic	sense_dnaA_517_to_stop	2.55600540413479
SEA15229	Indo-Oceanic	sense_dnaA_517_to_stop	2.74095119397362
SEA15230	Indo-Oceanic	sense_dnaA_517_to_stop	2.50920546782853
SEA17020023	Indo-Oceanic	sense_dnaA_517_to_stop	2.60572682300737
SEA17020024	Indo-Oceanic	sense_dnaA_517_to_stop	2.65463770039107
SEA17020028	East-Asian	sense_dnaA_517_to_stop	0.134248501105345
SEA17020030	Euro-American	sense_dnaA_517_to_stop	2.68085732271589
1-0006	East-Asian	antisense_recF_506_from_start	0.732337781953516
1-0009	East-Asian	antisense_recF_506_from_start	0.619333718427139
1-0013	East-Asian	antisense_recF_506_from_start	1.89226414489224
1-0017	East-Asian	antisense_recF_506_from_start	0
1-0021	East-African-Indian	antisense_recF_506_from_start	2.13431738281336
1-0028	East-Asian	antisense_recF_506_from_start	0.212264199297846
1-0030	Indo-Oceanic	antisense_recF_506_from_start	1.63464620068695
1-0031	East-Asian	antisense_recF_506_from_start	0.224604137844727
1-0036	Euro-American	antisense_recF_506_from_start	1.94004908930318
1-0039	East-Asian	antisense_recF_506_from_start	0
1-0044	Euro-American	antisense_recF_506_from_start	1.44478483004796
1-0045	East-Asian	antisense_recF_506_from_start	0
1-0047	East-African-Indian	antisense_recF_506_from_start	1.5586871804152
1-0054	East-Asian	antisense_recF_506_from_start	0
1-0056	East-Asian	antisense_recF_506_from_start	0.0429808803232199
1-0061	Indo-Oceanic	antisense_recF_506_from_start	1.21311863415501
1-0064	East-Asian	antisense_recF_506_from_start	0
1-0066	East-Asian	antisense_recF_506_from_start	0.379923616477956
1-0069	East-Asian	antisense_recF_506_from_start	0.115085336833602
1-0071	East-Asian	antisense_recF_506_from_start	0.25771760190447
1-0084	East-Asian	antisense_recF_506_from_start	0.0321830077343032
1-0102	East-Asian	antisense_recF_506_from_start	0
1-0107	East-African-Indian	antisense_recF_506_from_start	1.5542603876379
1-0110	East-Asian	antisense_recF_506_from_start	0
1-0112	East-Asian	antisense_recF_506_from_start	0.147552920203102
1-0116	East-Asian	antisense_recF_506_from_start	0.0412917782759392
1-0123	East-Asian	antisense_recF_506_from_start	0.355213419242741
1-0137	East-Asian	antisense_recF_506_from_start	0.0477705691985918
1-0149	East-Asian	antisense_recF_506_from_start	0
1-0150	East-Asian	antisense_recF_506_from_start	0
1-0153	East-Asian	antisense_recF_506_from_start	0
1-0156	Euro-American	antisense_recF_506_from_start	1.79445374455071
2-0013	East-Asian	antisense_recF_506_from_start	0
2-0021	Euro-American	antisense_recF_506_from_start	1.43643564131941
2-0022	Euro-American	antisense_recF_506_from_start	2.05028523361109
2-0023	Euro-American	antisense_recF_506_from_start	1.79807106000801
2-0028	Euro-American	antisense_recF_506_from_start	1.90505420873125
2-0029	Euro-American	antisense_recF_506_from_start	1.61087475426352
2-0034	East-Asian	antisense_recF_506_from_start	0
2-0043-unknown	Euro-American	antisense_recF_506_from_start	1.42948406365028
2-0046	Euro-American	antisense_recF_506_from_start	1.90517141674137
2-0052	East-Asian	antisense_recF_506_from_start	0
2-0068	East-Asian	antisense_recF_506_from_start	0
2-0111	Euro-American	antisense_recF_506_from_start	2.23134767250055
3-0059	Euro-American	antisense_recF_506_from_start	1.91569497549604
3-0090	Indo-Oceanic	antisense_recF_506_from_start	0
3-0096	Indo-Oceanic	antisense_recF_506_from_start	0
3-0124	Indo-Oceanic	antisense_recF_506_from_start	0
4-0012	Euro-American	antisense_recF_506_from_start	1.88717863686683
4-0062	East-Asian	antisense_recF_506_from_start	0
4-0073	Euro-American	antisense_recF_506_from_start	1.74426733029558
4-0077	East-Asian	antisense_recF_506_from_start	0.383754957515073
4-0087	Euro-American	antisense_recF_506_from_start	2.42571320646571
4-0096	East-Asian	antisense_recF_506_from_start	0.0241631312244427
N0054	East-African-Indian	antisense_recF_506_from_start	2.12010776418325
N0091	M. africanum	antisense_recF_506_from_start	1.90105850195959
N0153	Indo-Oceanic	antisense_recF_506_from_start	1.88181201959472
N0157	Indo-Oceanic	antisense_recF_506_from_start	0
N1063	M. africanum	antisense_recF_506_from_start	1.74458253103267
N1176	M. africanum	antisense_recF_506_from_start	1.99954187229567
N1216	Euro-American	antisense_recF_506_from_start	1.95831246654879
SEA00042	Euro-American	antisense_recF_506_from_start	1.70526554851262
SEA06535	Euro-American	antisense_recF_506_from_start	1.78931731944028
SEA07010354	East-African-Indian	antisense_recF_506_from_start	1.87060003039493
SEA07020250	Euro-American	antisense_recF_506_from_start	0.0836931669111741
SEA08151	Indo-Oceanic	antisense_recF_506_from_start	1.82704948667419
SEA09020048	Euro-American	antisense_recF_506_from_start	1.70103061641849
SEA09167	Euro-American	antisense_recF_506_from_start	1.40317900486417
SEA11020038	Euro-American	antisense_recF_506_from_start	1.6452736396252
SEA11020057	Euro-American	antisense_recF_506_from_start	2.04626912197371
SEA11020068	Euro-American	antisense_recF_506_from_start	2.21059445425872
SEA11020092	Euro-American	antisense_recF_506_from_start	1.65823563106131
SEA11278	Lineage 7	antisense_recF_506_from_start	1.87527348132594
SEA12126	Indo-Oceanic	antisense_recF_506_from_start	1.96286680768019
SEA12202	Indo-Oceanic	antisense_recF_506_from_start	2.00759950117352
SEA12334	Indo-Oceanic	antisense_recF_506_from_start	1.6641499729937
SEA13111	Indo-Oceanic	antisense_recF_506_from_start	1.62872208476371
SEA14117	East-Asian	antisense_recF_506_from_start	1.58717255581688
SEA14333	Indo-Oceanic	antisense_recF_506_from_start	1.60153910933362
SEA15228	Indo-Oceanic	antisense_recF_506_from_start	1.86041228399813
SEA15229	Indo-Oceanic	antisense_recF_506_from_start	1.75119316235987
SEA15230	Indo-Oceanic	antisense_recF_506_from_start	1.80860552678922
SEA17020023	Indo-Oceanic	antisense_recF_506_from_start	1.7324124823761
SEA17020024	Indo-Oceanic	antisense_recF_506_from_start	1.68176806401155
SEA17020028	East-Asian	antisense_recF_506_from_start	0
SEA17020030	Euro-American	antisense_recF_506_from_start	2.07018756030199
1-0006	East-Asian	sense_recF_509_from_start	1.40783274498075
1-0009	East-Asian	sense_recF_509_from_start	1.93966458642466
1-0013	East-Asian	sense_recF_509_from_start	2.79236503716806
1-0017	East-Asian	sense_recF_509_from_start	0.659167639080771
1-0021	East-African-Indian	sense_recF_509_from_start	2.79236503716806
1-0028	East-Asian	sense_recF_509_from_start	1.35637045787203
1-0030	Indo-Oceanic	sense_recF_509_from_start	2.79236503716806
1-0031	East-Asian	sense_recF_509_from_start	0.0394927325877384
1-0036	Euro-American	sense_recF_509_from_start	2.79236503716806
1-0039	East-Asian	sense_recF_509_from_start	0.593234035686041
1-0044	Euro-American	sense_recF_509_from_start	2.59546828467163
1-0045	East-Asian	sense_recF_509_from_start	0.701981390741778
1-0047	East-African-Indian	sense_recF_509_from_start	2.79236503716806
1-0054	East-Asian	sense_recF_509_from_start	0.54457828972004
1-0056	East-Asian	sense_recF_509_from_start	1.19533478107477
1-0061	Indo-Oceanic	sense_recF_509_from_start	2.79236503716806
1-0064	East-Asian	sense_recF_509_from_start	0.778460504359669
1-0066	East-Asian	sense_recF_509_from_start	1.27416673863
1-0069	East-Asian	sense_recF_509_from_start	0.703807305586752
1-0071	East-Asian	sense_recF_509_from_start	0.952208885229549
1-0084	East-Asian	sense_recF_509_from_start	0
1-0102	East-Asian	sense_recF_509_from_start	0
1-0107	East-African-Indian	sense_recF_509_from_start	2.79236503716806
1-0110	East-Asian	sense_recF_509_from_start	0
1-0112	East-Asian	sense_recF_509_from_start	0.269170626262742
1-0116	East-Asian	sense_recF_509_from_start	0.949020094825961
1-0123	East-Asian	sense_recF_509_from_start	0.98139858269041
1-0137	East-Asian	sense_recF_509_from_start	0.688530908354515
1-0149	East-Asian	sense_recF_509_from_start	0.403677130468128
1-0150	East-Asian	sense_recF_509_from_start	0.412873875077492
1-0153	East-Asian	sense_recF_509_from_start	0.154958979524661
1-0156	Euro-American	sense_recF_509_from_start	2.79236503716806
2-0013	East-Asian	sense_recF_509_from_start	0.287170950090661
2-0021	Euro-American	sense_recF_509_from_start	2.79236503716806
2-0022	Euro-American	sense_recF_509_from_start	2.79236503716806
2-0023	Euro-American	sense_recF_509_from_start	2.79236503716806
2-0028	Euro-American	sense_recF_509_from_start	2.79236503716806
2-0029	Euro-American	sense_recF_509_from_start	2.79236503716806
2-0034	East-Asian	sense_recF_509_from_start	0.12200757223764
2-0043-unknown	Euro-American	sense_recF_509_from_start	2.79236503716806
2-0046	Euro-American	sense_recF_509_from_start	2.79236503716806
2-0052	East-Asian	sense_recF_509_from_start	0.950011671252662
2-0068	East-Asian	sense_recF_509_from_start	0
2-0111	Euro-American	sense_recF_509_from_start	2.79236503716806
3-0059	Euro-American	sense_recF_509_from_start	2.79236503716806
3-0090	Indo-Oceanic	sense_recF_509_from_start	0
3-0096	Indo-Oceanic	sense_recF_509_from_start	0
3-0124	Indo-Oceanic	sense_recF_509_from_start	0
4-0012	Euro-American	sense_recF_509_from_start	2.79236503716806
4-0062	East-Asian	sense_recF_509_from_start	1.04333670587017
4-0073	Euro-American	sense_recF_509_from_start	2.79236503716806
4-0077	East-Asian	sense_recF_509_from_start	1.13938784592136
4-0087	Euro-American	sense_recF_509_from_start	2.79236503716806
4-0096	East-Asian	sense_recF_509_from_start	0.683836026461942
N0054	East-African-Indian	sense_recF_509_from_start	2.79236503716806
N0091	M. africanum	sense_recF_509_from_start	2.79236503716806
N0153	Indo-Oceanic	sense_recF_509_from_start	2.79236503716806
N0157	Indo-Oceanic	sense_recF_509_from_start	0.132941748713967
N1063	M. africanum	sense_recF_509_from_start	2.79236503716806
N1176	M. africanum	sense_recF_509_from_start	2.79236503716806
N1216	Euro-American	sense_recF_509_from_start	2.79236503716806
SEA00042	Euro-American	sense_recF_509_from_start	2.79236503716806
SEA06535	Euro-American	sense_recF_509_from_start	2.67032928322319
SEA07010354	East-African-Indian	sense_recF_509_from_start	2.79236503716806
SEA07020250	Euro-American	sense_recF_509_from_start	1.21636396297971
SEA08151	Indo-Oceanic	sense_recF_509_from_start	2.79236503716806
SEA09020048	Euro-American	sense_recF_509_from_start	2.79236503716806
SEA09167	Euro-American	sense_recF_509_from_start	2.79236503716806
SEA11020038	Euro-American	sense_recF_509_from_start	2.79236503716806
SEA11020057	Euro-American	sense_recF_509_from_start	2.79236503716806
SEA11020068	Euro-American	sense_recF_509_from_start	2.79236503716806
SEA11020092	Euro-American	sense_recF_509_from_start	2.79236503716806
SEA11278	Lineage 7	sense_recF_509_from_start	2.79236503716806
SEA12126	Indo-Oceanic	sense_recF_509_from_start	2.79236503716806
SEA12202	Indo-Oceanic	sense_recF_509_from_start	2.79236503716806
SEA12334	Indo-Oceanic	sense_recF_509_from_start	2.79236503716806
SEA13111	Indo-Oceanic	sense_recF_509_from_start	2.69076776975873
SEA14117	East-Asian	sense_recF_509_from_start	2.79236503716806
SEA14333	Indo-Oceanic	sense_recF_509_from_start	2.79236503716806
SEA15228	Indo-Oceanic	sense_recF_509_from_start	2.79236503716806
SEA15229	Indo-Oceanic	sense_recF_509_from_start	2.79236503716806
SEA15230	Indo-Oceanic	sense_recF_509_from_start	2.79236503716806
SEA17020023	Indo-Oceanic	sense_recF_509_from_start	2.79236503716806
SEA17020024	Indo-Oceanic	sense_recF_509_from_start	2.79236503716806
SEA17020028	East-Asian	sense_recF_509_from_start	0.293029502746142
SEA17020030	Euro-American	sense_recF_509_from_start	2.76338324420728
1-0006	East-Asian	antisense_gyrB_67_from_start	0.641793275463684
1-0009	East-Asian	antisense_gyrB_67_from_start	0.827114268837436
1-0013	East-Asian	antisense_gyrB_67_from_start	2.79236503716806
1-0017	East-Asian	antisense_gyrB_67_from_start	0.656379821709151
1-0021	East-African-Indian	antisense_gyrB_67_from_start	2.79236503716806
1-0028	East-Asian	antisense_gyrB_67_from_start	0.756055188982076
1-0030	Indo-Oceanic	antisense_gyrB_67_from_start	2.79236503716806
1-0031	East-Asian	antisense_gyrB_67_from_start	0.785873753497805
1-0036	Euro-American	antisense_gyrB_67_from_start	2.79236503716806
1-0039	East-Asian	antisense_gyrB_67_from_start	0.206668475232354
1-0044	Euro-American	antisense_gyrB_67_from_start	2.76396231391929
1-0045	East-Asian	antisense_gyrB_67_from_start	0.26444408178975
1-0047	East-African-Indian	antisense_gyrB_67_from_start	2.79236503716806
1-0054	East-Asian	antisense_gyrB_67_from_start	0
1-0056	East-Asian	antisense_gyrB_67_from_start	0.41022139124193
1-0061	Indo-Oceanic	antisense_gyrB_67_from_start	2.79236503716806
1-0064	East-Asian	antisense_gyrB_67_from_start	0.313337773644515
1-0066	East-Asian	antisense_gyrB_67_from_start	0.437843592407138
1-0069	East-Asian	antisense_gyrB_67_from_start	0
1-0071	East-Asian	antisense_gyrB_67_from_start	0.777122178671458
1-0084	East-Asian	antisense_gyrB_67_from_start	0.130520926927596
1-0102	East-Asian	antisense_gyrB_67_from_start	0.136983828485804
1-0107	East-African-Indian	antisense_gyrB_67_from_start	2.79236503716806
1-0110	East-Asian	antisense_gyrB_67_from_start	0
1-0112	East-Asian	antisense_gyrB_67_from_start	0
1-0116	East-Asian	antisense_gyrB_67_from_start	0.265877200165901
1-0123	East-Asian	antisense_gyrB_67_from_start	0.414300098068637
1-0137	East-Asian	antisense_gyrB_67_from_start	0.426618785767428
1-0149	East-Asian	antisense_gyrB_67_from_start	0.238512788947839
1-0150	East-Asian	antisense_gyrB_67_from_start	0
1-0153	East-Asian	antisense_gyrB_67_from_start	0
1-0156	Euro-American	antisense_gyrB_67_from_start	2.39876345140598
2-0013	East-Asian	antisense_gyrB_67_from_start	0.184665509105526
2-0021	Euro-American	antisense_gyrB_67_from_start	2.57318665090421
2-0022	Euro-American	antisense_gyrB_67_from_start	2.79236503716806
2-0023	Euro-American	antisense_gyrB_67_from_start	2.79236503716806
2-0028	Euro-American	antisense_gyrB_67_from_start	2.79236503716806
2-0029	Euro-American	antisense_gyrB_67_from_start	2.79236503716806
2-0034	East-Asian	antisense_gyrB_67_from_start	0.182966453025415
2-0043-unknown	Euro-American	antisense_gyrB_67_from_start	2.79236503716806
2-0046	Euro-American	antisense_gyrB_67_from_start	2.79236503716806
2-0052	East-Asian	antisense_gyrB_67_from_start	0.225129227285832
2-0068	East-Asian	antisense_gyrB_67_from_start	0.53831416289439
2-0111	Euro-American	antisense_gyrB_67_from_start	2.79236503716806
3-0059	Euro-American	antisense_gyrB_67_from_start	2.74220189945026
3-0090	Indo-Oceanic	antisense_gyrB_67_from_start	0.0264620984273698
3-0096	Indo-Oceanic	antisense_gyrB_67_from_start	0.284757238964185
3-0124	Indo-Oceanic	antisense_gyrB_67_from_start	0.0999349879177678
4-0012	Euro-American	antisense_gyrB_67_from_start	2.79236503716806
4-0062	East-Asian	antisense_gyrB_67_from_start	0.388396097598859
4-0073	Euro-American	antisense_gyrB_67_from_start	2.79236503716806
4-0077	East-Asian	antisense_gyrB_67_from_start	0.470559785052346
4-0087	Euro-American	antisense_gyrB_67_from_start	2.79236503716806
4-0096	East-Asian	antisense_gyrB_67_from_start	0.577542986735719
N0054	East-African-Indian	antisense_gyrB_67_from_start	2.79236503716806
N0091	M. africanum	antisense_gyrB_67_from_start	2.79236503716806
N0153	Indo-Oceanic	antisense_gyrB_67_from_start	2.79236503716806
N0157	Indo-Oceanic	antisense_gyrB_67_from_start	0.103006542172194
N1063	M. africanum	antisense_gyrB_67_from_start	2.79236503716806
N1176	M. africanum	antisense_gyrB_67_from_start	2.69772468776771
N1216	Euro-American	antisense_gyrB_67_from_start	2.6744545990663
SEA00042	Euro-American	antisense_gyrB_67_from_start	2.78348499082645
SEA06535	Euro-American	antisense_gyrB_67_from_start	2.79236503716806
SEA07010354	East-African-Indian	antisense_gyrB_67_from_start	2.79236503716806
SEA07020250	Euro-American	antisense_gyrB_67_from_start	0.41758236121175
SEA08151	Indo-Oceanic	antisense_gyrB_67_from_start	2.79236503716806
SEA09020048	Euro-American	antisense_gyrB_67_from_start	2.79236503716806
SEA09167	Euro-American	antisense_gyrB_67_from_start	2.39442424642006
SEA11020038	Euro-American	antisense_gyrB_67_from_start	2.79236503716806
SEA11020057	Euro-American	antisense_gyrB_67_from_start	2.79236503716806
SEA11020068	Euro-American	antisense_gyrB_67_from_start	2.79236503716806
SEA11020092	Euro-American	antisense_gyrB_67_from_start	2.79236503716806
SEA11278	Lineage 7	antisense_gyrB_67_from_start	2.79236503716806
SEA12126	Indo-Oceanic	antisense_gyrB_67_from_start	2.79236503716806
SEA12202	Indo-Oceanic	antisense_gyrB_67_from_start	2.79236503716806
SEA12334	Indo-Oceanic	antisense_gyrB_67_from_start	2.79236503716806
SEA13111	Indo-Oceanic	antisense_gyrB_67_from_start	2.79236503716806
SEA14117	East-Asian	antisense_gyrB_67_from_start	2.79236503716806
SEA14333	Indo-Oceanic	antisense_gyrB_67_from_start	2.79236503716806
SEA15228	Indo-Oceanic	antisense_gyrB_67_from_start	2.5993796754064
SEA15229	Indo-Oceanic	antisense_gyrB_67_from_start	2.79236503716806
SEA15230	Indo-Oceanic	antisense_gyrB_67_from_start	2.79236503716806
SEA17020028	East-Asian	antisense_gyrB_67_from_start	0
SEA17020030	Euro-American	antisense_gyrB_67_from_start	2.47440644524847
1-0006	East-Asian	sense_gyrB_70_from_start	0.624526772332414
1-0009	East-Asian	sense_gyrB_70_from_start	0.428682690616831
1-0013	East-Asian	sense_gyrB_70_from_start	2.74177048515281
1-0017	East-Asian	sense_gyrB_70_from_start	0.653586606817471
1-0021	East-African-Indian	sense_gyrB_70_from_start	2.4131293992121
1-0028	East-Asian	sense_gyrB_70_from_start	1.12496679524061
1-0030	Indo-Oceanic	sense_gyrB_70_from_start	2.59867622409952
1-0031	East-Asian	sense_gyrB_70_from_start	0.732869058206262
1-0036	Euro-American	sense_gyrB_70_from_start	2.57114945719876
1-0039	East-Asian	sense_gyrB_70_from_start	0.50111583369761
1-0044	Euro-American	sense_gyrB_70_from_start	2.66363978731321
1-0045	East-Asian	sense_gyrB_70_from_start	0.463357436076991
1-0047	East-African-Indian	sense_gyrB_70_from_start	2.67642904179176
1-0054	East-Asian	sense_gyrB_70_from_start	0.464604882547644
1-0056	East-Asian	sense_gyrB_70_from_start	0.529209427459016
1-0061	Indo-Oceanic	sense_gyrB_70_from_start	2.74257748115469
1-0064	East-Asian	sense_gyrB_70_from_start	0.0215508514147957
1-0066	East-Asian	sense_gyrB_70_from_start	0.658326423734954
1-0069	East-Asian	sense_gyrB_70_from_start	0.635575244029792
1-0071	East-Asian	sense_gyrB_70_from_start	0.399613979026816
1-0084	East-Asian	sense_gyrB_70_from_start	0.412765320342476
1-0102	East-Asian	sense_gyrB_70_from_start	0.336811078917966
1-0107	East-African-Indian	sense_gyrB_70_from_start	2.17073386110427
1-0110	East-Asian	sense_gyrB_70_from_start	0.149696290630042
1-0112	East-Asian	sense_gyrB_70_from_start	0.394173184086517
1-0116	East-Asian	sense_gyrB_70_from_start	0.781883988589835
1-0123	East-Asian	sense_gyrB_70_from_start	0.744080242335676
1-0137	East-Asian	sense_gyrB_70_from_start	0.571649608058896
1-0149	East-Asian	sense_gyrB_70_from_start	0.0460528736882219
1-0150	East-Asian	sense_gyrB_70_from_start	0.728375700805421
1-0153	East-Asian	sense_gyrB_70_from_start	0.10636970845953
1-0156	Euro-American	sense_gyrB_70_from_start	2.56198548524476
2-0013	East-Asian	sense_gyrB_70_from_start	0.191208354972298
2-0021	Euro-American	sense_gyrB_70_from_start	2.68398562654378
2-0022	Euro-American	sense_gyrB_70_from_start	2.47424205057846
2-0023	Euro-American	sense_gyrB_70_from_start	2.4733526591803
2-0028	Euro-American	sense_gyrB_70_from_start	2.4809723685072
2-0029	Euro-American	sense_gyrB_70_from_start	2.63335262247423
2-0034	East-Asian	sense_gyrB_70_from_start	0
2-0043-unknown	Euro-American	sense_gyrB_70_from_start	2.65139542628241
2-0046	Euro-American	sense_gyrB_70_from_start	2.35972623121077
2-0052	East-Asian	sense_gyrB_70_from_start	0.293470726528371
2-0068	East-Asian	sense_gyrB_70_from_start	0.207271081303256
2-0111	Euro-American	sense_gyrB_70_from_start	2.66605123563381
3-0059	Euro-American	sense_gyrB_70_from_start	2.79236503716806
3-0090	Indo-Oceanic	sense_gyrB_70_from_start	0
3-0096	Indo-Oceanic	sense_gyrB_70_from_start	0.138637559024596
3-0124	Indo-Oceanic	sense_gyrB_70_from_start	0
4-0012	Euro-American	sense_gyrB_70_from_start	2.6382848887062
4-0062	East-Asian	sense_gyrB_70_from_start	0.399614622564403
4-0073	Euro-American	sense_gyrB_70_from_start	2.76592211502923
4-0077	East-Asian	sense_gyrB_70_from_start	0.578076613264853
4-0087	Euro-American	sense_gyrB_70_from_start	2.24158792895515
4-0096	East-Asian	sense_gyrB_70_from_start	0.588147541966549
N0054	East-African-Indian	sense_gyrB_70_from_start	2.65372658413923
N0091	M. africanum	sense_gyrB_70_from_start	2.65287186053311
N0153	Indo-Oceanic	sense_gyrB_70_from_start	2.79133003433779
N0157	Indo-Oceanic	sense_gyrB_70_from_start	0.00365873176900074
N1063	M. africanum	sense_gyrB_70_from_start	2.79236503716806
N1176	M. africanum	sense_gyrB_70_from_start	2.55146907581747
N1216	Euro-American	sense_gyrB_70_from_start	2.62382852599633
SEA00042	Euro-American	sense_gyrB_70_from_start	2.79236503716806
SEA06535	Euro-American	sense_gyrB_70_from_start	2.55762769332312
SEA07010354	East-African-Indian	sense_gyrB_70_from_start	2.79236503716806
SEA07020250	Euro-American	sense_gyrB_70_from_start	0.478336392290847
SEA08151	Indo-Oceanic	sense_gyrB_70_from_start	2.55063235736639
SEA09020048	Euro-American	sense_gyrB_70_from_start	2.62591191563273
SEA09167	Euro-American	sense_gyrB_70_from_start	2.61467031198252
SEA11020038	Euro-American	sense_gyrB_70_from_start	2.47361884238818
SEA11020057	Euro-American	sense_gyrB_70_from_start	2.79236503716806
SEA11020068	Euro-American	sense_gyrB_70_from_start	2.70144880008752
SEA11020092	Euro-American	sense_gyrB_70_from_start	2.51067111502623
SEA11278	Lineage 7	sense_gyrB_70_from_start	2.27244642418108
SEA12126	Indo-Oceanic	sense_gyrB_70_from_start	2.39365560897526
SEA12202	Indo-Oceanic	sense_gyrB_70_from_start	2.66630669884622
SEA12334	Indo-Oceanic	sense_gyrB_70_from_start	2.37935035847625
SEA13111	Indo-Oceanic	sense_gyrB_70_from_start	2.19990670665786
SEA14117	East-Asian	sense_gyrB_70_from_start	2.31940181816865
SEA14333	Indo-Oceanic	sense_gyrB_70_from_start	2.76013561856842
SEA15228	Indo-Oceanic	sense_gyrB_70_from_start	2.00876496331912
SEA15229	Indo-Oceanic	sense_gyrB_70_from_start	2.79236503716806
SEA15230	Indo-Oceanic	sense_gyrB_70_from_start	2.50817973366453
SEA17020028	East-Asian	sense_gyrB_70_from_start	0.350347180376308
SEA17020030	Euro-American	sense_gyrB_70_from_start	2.12182854374859
1-0006	East-Asian	antisense_gyrB_256_to_stop	1.02842371400606
1-0009	East-Asian	antisense_gyrB_256_to_stop	0.726961399537691
1-0013	East-Asian	antisense_gyrB_256_to_stop	2.79236503716806
1-0017	East-Asian	antisense_gyrB_256_to_stop	0
1-0021	East-African-Indian	antisense_gyrB_256_to_stop	2.79236503716806
1-0028	East-Asian	antisense_gyrB_256_to_stop	1.08577039707753
1-0030	Indo-Oceanic	antisense_gyrB_256_to_stop	2.79236503716806
1-0031	East-Asian	antisense_gyrB_256_to_stop	0.649990325416032
1-0036	Euro-American	antisense_gyrB_256_to_stop	2.79236503716806
1-0039	East-Asian	antisense_gyrB_256_to_stop	0.0289451032296348
1-0044	Euro-American	antisense_gyrB_256_to_stop	2.79236503716806
1-0045	East-Asian	antisense_gyrB_256_to_stop	0.121537199510482
1-0047	East-African-Indian	antisense_gyrB_256_to_stop	2.79236503716806
1-0054	East-Asian	antisense_gyrB_256_to_stop	0.240997560052337
1-0056	East-Asian	antisense_gyrB_256_to_stop	0.662151786989579
1-0061	Indo-Oceanic	antisense_gyrB_256_to_stop	2.79236503716806
1-0064	East-Asian	antisense_gyrB_256_to_stop	0.291459923276871
1-0066	East-Asian	antisense_gyrB_256_to_stop	0.462128244530565
1-0069	East-Asian	antisense_gyrB_256_to_stop	0
1-0071	East-Asian	antisense_gyrB_256_to_stop	0
1-0084	East-Asian	antisense_gyrB_256_to_stop	0.419646231832561
1-0102	East-Asian	antisense_gyrB_256_to_stop	0
1-0107	East-African-Indian	antisense_gyrB_256_to_stop	2.79236503716806
1-0110	East-Asian	antisense_gyrB_256_to_stop	0
1-0112	East-Asian	antisense_gyrB_256_to_stop	0.847355921140381
1-0116	East-Asian	antisense_gyrB_256_to_stop	0.295453780105781
1-0123	East-Asian	antisense_gyrB_256_to_stop	0
1-0137	East-Asian	antisense_gyrB_256_to_stop	0
1-0149	East-Asian	antisense_gyrB_256_to_stop	0
1-0150	East-Asian	antisense_gyrB_256_to_stop	0
1-0153	East-Asian	antisense_gyrB_256_to_stop	0
1-0156	Euro-American	antisense_gyrB_256_to_stop	2.78376959158104
2-0013	East-Asian	antisense_gyrB_256_to_stop	0
2-0021	Euro-American	antisense_gyrB_256_to_stop	2.79236503716806
2-0022	Euro-American	antisense_gyrB_256_to_stop	2.79236503716806
2-0023	Euro-American	antisense_gyrB_256_to_stop	2.79236503716806
2-0028	Euro-American	antisense_gyrB_256_to_stop	2.52774211026999
2-0029	Euro-American	antisense_gyrB_256_to_stop	2.71969639392609
2-0034	East-Asian	antisense_gyrB_256_to_stop	0.119355558548043
2-0043-unknown	Euro-American	antisense_gyrB_256_to_stop	2.79236503716806
2-0046	Euro-American	antisense_gyrB_256_to_stop	2.79236503716806
2-0052	East-Asian	antisense_gyrB_256_to_stop	0
2-0068	East-Asian	antisense_gyrB_256_to_stop	0.155556044759101
2-0111	Euro-American	antisense_gyrB_256_to_stop	2.79236503716806
3-0059	Euro-American	antisense_gyrB_256_to_stop	2.79236503716806
3-0090	Indo-Oceanic	antisense_gyrB_256_to_stop	0
3-0096	Indo-Oceanic	antisense_gyrB_256_to_stop	0
3-0124	Indo-Oceanic	antisense_gyrB_256_to_stop	0
4-0012	Euro-American	antisense_gyrB_256_to_stop	2.79236503716806
4-0062	East-Asian	antisense_gyrB_256_to_stop	0.237768845902695
4-0073	Euro-American	antisense_gyrB_256_to_stop	2.79236503716806
4-0077	East-Asian	antisense_gyrB_256_to_stop	0.611887552369286
4-0087	Euro-American	antisense_gyrB_256_to_stop	2.79236503716806
4-0096	East-Asian	antisense_gyrB_256_to_stop	0.419182736926329
N0054	East-African-Indian	antisense_gyrB_256_to_stop	2.79236503716806
N0091	M. africanum	antisense_gyrB_256_to_stop	2.79236503716806
N0153	Indo-Oceanic	antisense_gyrB_256_to_stop	2.79236503716806
N0157	Indo-Oceanic	antisense_gyrB_256_to_stop	0
N1063	M. africanum	antisense_gyrB_256_to_stop	2.79236503716806
N1176	M. africanum	antisense_gyrB_256_to_stop	2.79236503716806
N1216	Euro-American	antisense_gyrB_256_to_stop	2.79236503716806
SEA00042	Euro-American	antisense_gyrB_256_to_stop	2.79236503716806
SEA06535	Euro-American	antisense_gyrB_256_to_stop	2.79236503716806
SEA07010354	East-African-Indian	antisense_gyrB_256_to_stop	2.79236503716806
SEA07020250	Euro-American	antisense_gyrB_256_to_stop	0.112727779683329
SEA08151	Indo-Oceanic	antisense_gyrB_256_to_stop	2.79236503716806
SEA09020048	Euro-American	antisense_gyrB_256_to_stop	2.79236503716806
SEA09167	Euro-American	antisense_gyrB_256_to_stop	2.79236503716806
SEA11020038	Euro-American	antisense_gyrB_256_to_stop	2.1702906588826
SEA11020057	Euro-American	antisense_gyrB_256_to_stop	2.79236503716806
SEA11020068	Euro-American	antisense_gyrB_256_to_stop	2.79236503716806
SEA11020092	Euro-American	antisense_gyrB_256_to_stop	2.79236503716806
SEA11278	Lineage 7	antisense_gyrB_256_to_stop	2.79236503716806
SEA12126	Indo-Oceanic	antisense_gyrB_256_to_stop	2.79236503716806
SEA12202	Indo-Oceanic	antisense_gyrB_256_to_stop	2.79236503716806
SEA12334	Indo-Oceanic	antisense_gyrB_256_to_stop	2.79236503716806
SEA13111	Indo-Oceanic	antisense_gyrB_256_to_stop	2.79236503716806
SEA14117	East-Asian	antisense_gyrB_256_to_stop	2.79236503716806
SEA14333	Indo-Oceanic	antisense_gyrB_256_to_stop	2.79236503716806
SEA15228	Indo-Oceanic	antisense_gyrB_256_to_stop	2.79236503716806
SEA15229	Indo-Oceanic	antisense_gyrB_256_to_stop	2.79236503716806
SEA15230	Indo-Oceanic	antisense_gyrB_256_to_stop	2.79236503716806
SEA17020028	East-Asian	antisense_gyrB_256_to_stop	0
SEA17020030	Euro-American	antisense_gyrB_256_to_stop	2.79236503716806
1-0006	East-Asian	sense_gyrB_253_to_stop	0.686851825224855
1-0009	East-Asian	sense_gyrB_253_to_stop	0.749927421613203
1-0013	East-Asian	sense_gyrB_253_to_stop	2.52045526467346
1-0017	East-Asian	sense_gyrB_253_to_stop	0.622498929033374
1-0021	East-African-Indian	sense_gyrB_253_to_stop	1.90206501215949
1-0028	East-Asian	sense_gyrB_253_to_stop	0.384246625003736
1-0030	Indo-Oceanic	sense_gyrB_253_to_stop	2.51142031196909
1-0031	East-Asian	sense_gyrB_253_to_stop	0.527779213897221
1-0036	Euro-American	sense_gyrB_253_to_stop	2.6329213273992
1-0039	East-Asian	sense_gyrB_253_to_stop	0.336729015796727
1-0044	Euro-American	sense_gyrB_253_to_stop	2.64725479384367
1-0045	East-Asian	sense_gyrB_253_to_stop	0.388850931840989
1-0047	East-African-Indian	sense_gyrB_253_to_stop	2.29127742216
1-0054	East-Asian	sense_gyrB_253_to_stop	0.231241343390193
1-0056	East-Asian	sense_gyrB_253_to_stop	0.843100203280961
1-0061	Indo-Oceanic	sense_gyrB_253_to_stop	2.52086392190005
1-0064	East-Asian	sense_gyrB_253_to_stop	0.0580028926416189
1-0066	East-Asian	sense_gyrB_253_to_stop	0.573727020488911
1-0069	East-Asian	sense_gyrB_253_to_stop	0.767162033413295
1-0071	East-Asian	sense_gyrB_253_to_stop	0.0812378638759735
1-0084	East-Asian	sense_gyrB_253_to_stop	0.244707141987657
1-0102	East-Asian	sense_gyrB_253_to_stop	0
1-0107	East-African-Indian	sense_gyrB_253_to_stop	2.21202620544173
1-0110	East-Asian	sense_gyrB_253_to_stop	0.368336577105382
1-0112	East-Asian	sense_gyrB_253_to_stop	0.264090708898389
1-0116	East-Asian	sense_gyrB_253_to_stop	0.490146686697036
1-0123	East-Asian	sense_gyrB_253_to_stop	0.677141514130103
1-0137	East-Asian	sense_gyrB_253_to_stop	0.567585675678997
1-0149	East-Asian	sense_gyrB_253_to_stop	0.787159895872127
1-0150	East-Asian	sense_gyrB_253_to_stop	0.892351435916547
1-0153	East-Asian	sense_gyrB_253_to_stop	0.545568958436818
1-0156	Euro-American	sense_gyrB_253_to_stop	2.79236503716806
2-0013	East-Asian	sense_gyrB_253_to_stop	0.12986457468584
2-0021	Euro-American	sense_gyrB_253_to_stop	2.50459016848191
2-0022	Euro-American	sense_gyrB_253_to_stop	2.79236503716806
2-0023	Euro-American	sense_gyrB_253_to_stop	2.30490397262097
2-0028	Euro-American	sense_gyrB_253_to_stop	2.47379859042544
2-0029	Euro-American	sense_gyrB_253_to_stop	2.57953678773052
2-0034	East-Asian	sense_gyrB_253_to_stop	0.0993085239785059
2-0043-unknown	Euro-American	sense_gyrB_253_to_stop	2.4331268810721
2-0046	Euro-American	sense_gyrB_253_to_stop	2.47272293309595
2-0052	East-Asian	sense_gyrB_253_to_stop	0.76646479560673
2-0068	East-Asian	sense_gyrB_253_to_stop	0.382829416888256
2-0111	Euro-American	sense_gyrB_253_to_stop	2.12815515709784
3-0059	Euro-American	sense_gyrB_253_to_stop	2.65692041842899
3-0090	Indo-Oceanic	sense_gyrB_253_to_stop	0.196387099869682
3-0096	Indo-Oceanic	sense_gyrB_253_to_stop	0.477244395058589
3-0124	Indo-Oceanic	sense_gyrB_253_to_stop	0
4-0012	Euro-American	sense_gyrB_253_to_stop	2.51069274988728
4-0062	East-Asian	sense_gyrB_253_to_stop	0.323907371147146
4-0073	Euro-American	sense_gyrB_253_to_stop	2.58785890487353
4-0077	East-Asian	sense_gyrB_253_to_stop	0.574161563261469
4-0087	Euro-American	sense_gyrB_253_to_stop	2.60190485304682
4-0096	East-Asian	sense_gyrB_253_to_stop	0.694582407925938
N0054	East-African-Indian	sense_gyrB_253_to_stop	2.60131846729888
N0091	M. africanum	sense_gyrB_253_to_stop	2.42442381178978
N0153	Indo-Oceanic	sense_gyrB_253_to_stop	2.59786918309637
N0157	Indo-Oceanic	sense_gyrB_253_to_stop	0.00224916151432922
N1063	M. africanum	sense_gyrB_253_to_stop	2.55959008150142
N1176	M. africanum	sense_gyrB_253_to_stop	2.56769106256975
N1216	Euro-American	sense_gyrB_253_to_stop	2.4299729641002
SEA00042	Euro-American	sense_gyrB_253_to_stop	2.05279622843319
SEA06535	Euro-American	sense_gyrB_253_to_stop	2.40878622786812
SEA07010354	East-African-Indian	sense_gyrB_253_to_stop	1.86195741551432
SEA07020250	Euro-American	sense_gyrB_253_to_stop	0.717627338200663
SEA08151	Indo-Oceanic	sense_gyrB_253_to_stop	2.5798651324913
SEA09020048	Euro-American	sense_gyrB_253_to_stop	2.79236503716806
SEA09167	Euro-American	sense_gyrB_253_to_stop	2.79236503716806
SEA11020038	Euro-American	sense_gyrB_253_to_stop	2.51031551421324
SEA11020057	Euro-American	sense_gyrB_253_to_stop	2.65604431650533
SEA11020068	Euro-American	sense_gyrB_253_to_stop	2.27257988320264
SEA11020092	Euro-American	sense_gyrB_253_to_stop	2.46511418030927
SEA11278	Lineage 7	sense_gyrB_253_to_stop	2.79236503716806
SEA12126	Indo-Oceanic	sense_gyrB_253_to_stop	2.46065802144537
SEA12202	Indo-Oceanic	sense_gyrB_253_to_stop	2.60457391343258
SEA12334	Indo-Oceanic	sense_gyrB_253_to_stop	2.45736741942082
SEA13111	Indo-Oceanic	sense_gyrB_253_to_stop	2.71467530924533
SEA14117	East-Asian	sense_gyrB_253_to_stop	2.21523216089795
SEA14333	Indo-Oceanic	sense_gyrB_253_to_stop	2.79236503716806
SEA15228	Indo-Oceanic	sense_gyrB_253_to_stop	2.54682334570168
SEA15229	Indo-Oceanic	sense_gyrB_253_to_stop	2.40870790082231
SEA15230	Indo-Oceanic	sense_gyrB_253_to_stop	2.61827965573504
SEA17020028	East-Asian	sense_gyrB_253_to_stop	0.23209582450349
SEA17020030	Euro-American	sense_gyrB_253_to_stop	1.87934397484036
1-0006	East-Asian	antisense_gyrA_613_from_start	0.333625573065676
1-0009	East-Asian	antisense_gyrA_613_from_start	0.466887128193817
1-0013	East-Asian	antisense_gyrA_613_from_start	2.79236503716806
1-0017	East-Asian	antisense_gyrA_613_from_start	1.19182317089399
1-0021	East-African-Indian	antisense_gyrA_613_from_start	2.79236503716806
1-0028	East-Asian	antisense_gyrA_613_from_start	0
1-0030	Indo-Oceanic	antisense_gyrA_613_from_start	2.78459474811926
1-0031	East-Asian	antisense_gyrA_613_from_start	0.244607162492351
1-0036	Euro-American	antisense_gyrA_613_from_start	2.54047338161685
1-0039	East-Asian	antisense_gyrA_613_from_start	0.241248706942499
1-0044	Euro-American	antisense_gyrA_613_from_start	2.71125014128203
1-0045	East-Asian	antisense_gyrA_613_from_start	0.149681701778615
1-0047	East-African-Indian	antisense_gyrA_613_from_start	2.62568591910582
1-0054	East-Asian	antisense_gyrA_613_from_start	0.125925423370957
1-0056	East-Asian	antisense_gyrA_613_from_start	0.509031545521386
1-0061	Indo-Oceanic	antisense_gyrA_613_from_start	2.79236503716806
1-0064	East-Asian	antisense_gyrA_613_from_start	0
1-0066	East-Asian	antisense_gyrA_613_from_start	0.342357424643023
1-0069	East-Asian	antisense_gyrA_613_from_start	0.442086402514722
1-0071	East-Asian	antisense_gyrA_613_from_start	0.424296125527352
1-0084	East-Asian	antisense_gyrA_613_from_start	0.00040763217943815
1-0102	East-Asian	antisense_gyrA_613_from_start	0.164843632946795
1-0107	East-African-Indian	antisense_gyrA_613_from_start	2.69644530806949
1-0110	East-Asian	antisense_gyrA_613_from_start	0.0212758716425451
1-0112	East-Asian	antisense_gyrA_613_from_start	0
1-0116	East-Asian	antisense_gyrA_613_from_start	0.372963147326697
1-0123	East-Asian	antisense_gyrA_613_from_start	0
1-0137	East-Asian	antisense_gyrA_613_from_start	0
1-0149	East-Asian	antisense_gyrA_613_from_start	0.148942047852821
1-0150	East-Asian	antisense_gyrA_613_from_start	0.0879742136588385
1-0153	East-Asian	antisense_gyrA_613_from_start	0.146973562232002
1-0156	Euro-American	antisense_gyrA_613_from_start	2.79236503716806
2-0013	East-Asian	antisense_gyrA_613_from_start	0
2-0021	Euro-American	antisense_gyrA_613_from_start	2.79236503716806
2-0022	Euro-American	antisense_gyrA_613_from_start	2.79236503716806
2-0023	Euro-American	antisense_gyrA_613_from_start	2.38930987889367
2-0028	Euro-American	antisense_gyrA_613_from_start	2.6395795971617
2-0029	Euro-American	antisense_gyrA_613_from_start	2.57147223952695
2-0034	East-Asian	antisense_gyrA_613_from_start	0.21063887150997
2-0043-unknown	Euro-American	antisense_gyrA_613_from_start	2.79236503716806
2-0046	Euro-American	antisense_gyrA_613_from_start	2.79236503716806
2-0052	East-Asian	antisense_gyrA_613_from_start	0.44242595412356
2-0068	East-Asian	antisense_gyrA_613_from_start	0.689610374633756
2-0111	Euro-American	antisense_gyrA_613_from_start	2.79236503716806
3-0059	Euro-American	antisense_gyrA_613_from_start	2.61912924399583
3-0090	Indo-Oceanic	antisense_gyrA_613_from_start	0
3-0096	Indo-Oceanic	antisense_gyrA_613_from_start	0.127410303601342
3-0124	Indo-Oceanic	antisense_gyrA_613_from_start	0.0999349879177678
4-0012	Euro-American	antisense_gyrA_613_from_start	2.79236503716806
4-0062	East-Asian	antisense_gyrA_613_from_start	0.616088122640456
4-0073	Euro-American	antisense_gyrA_613_from_start	2.79236503716806
4-0077	East-Asian	antisense_gyrA_613_from_start	0.696258039613167
4-0087	Euro-American	antisense_gyrA_613_from_start	2.79236503716806
4-0096	East-Asian	antisense_gyrA_613_from_start	0.204150562584507
N0054	East-African-Indian	antisense_gyrA_613_from_start	2.79236503716806
N0091	M. africanum	antisense_gyrA_613_from_start	2.69847270585571
N0153	Indo-Oceanic	antisense_gyrA_613_from_start	2.79236503716806
N0157	Indo-Oceanic	antisense_gyrA_613_from_start	0
N1063	M. africanum	antisense_gyrA_613_from_start	2.79236503716806
N1176	M. africanum	antisense_gyrA_613_from_start	2.79236503716806
N1216	Euro-American	antisense_gyrA_613_from_start	2.79236503716806
SEA00042	Euro-American	antisense_gyrA_613_from_start	2.79236503716806
SEA06535	Euro-American	antisense_gyrA_613_from_start	2.79236503716806
SEA07010354	East-African-Indian	antisense_gyrA_613_from_start	2.37570477547615
SEA07020250	Euro-American	antisense_gyrA_613_from_start	0.687617471825104
SEA08151	Indo-Oceanic	antisense_gyrA_613_from_start	2.79236503716806
SEA09020048	Euro-American	antisense_gyrA_613_from_start	2.79236503716806
SEA09167	Euro-American	antisense_gyrA_613_from_start	2.79236503716806
SEA11020038	Euro-American	antisense_gyrA_613_from_start	2.69605030454731
SEA11020057	Euro-American	antisense_gyrA_613_from_start	2.6847261660455
SEA11020068	Euro-American	antisense_gyrA_613_from_start	2.54890288556409
SEA11020092	Euro-American	antisense_gyrA_613_from_start	2.67575174992471
SEA11278	Lineage 7	antisense_gyrA_613_from_start	2.79236503716806
SEA12126	Indo-Oceanic	antisense_gyrA_613_from_start	2.79236503716806
SEA12202	Indo-Oceanic	antisense_gyrA_613_from_start	2.79236503716806
SEA12334	Indo-Oceanic	antisense_gyrA_613_from_start	2.79236503716806
SEA13111	Indo-Oceanic	antisense_gyrA_613_from_start	2.786496980361
SEA14117	East-Asian	antisense_gyrA_613_from_start	2.7025755395266
SEA14333	Indo-Oceanic	antisense_gyrA_613_from_start	2.79236503716806
SEA15228	Indo-Oceanic	antisense_gyrA_613_from_start	2.7619779426392
SEA15229	Indo-Oceanic	antisense_gyrA_613_from_start	2.7405137485364
SEA15230	Indo-Oceanic	antisense_gyrA_613_from_start	2.79236503716806
SEA17020028	East-Asian	antisense_gyrA_613_from_start	0
SEA17020030	Euro-American	antisense_gyrA_613_from_start	2.79236503716806
1-0006	East-Asian	sense_gyrA_616_from_start	0.298975330942175
1-0009	East-Asian	sense_gyrA_616_from_start	0.0102251303742806
1-0013	East-Asian	sense_gyrA_616_from_start	2.79236503716806
1-0017	East-Asian	sense_gyrA_616_from_start	1.25399897719623
1-0021	East-African-Indian	sense_gyrA_616_from_start	2.42159440198753
1-0028	East-Asian	sense_gyrA_616_from_start	0.851772523186595
1-0030	Indo-Oceanic	sense_gyrA_616_from_start	2.73725438107671
1-0031	East-Asian	sense_gyrA_616_from_start	0.462024768413506
1-0036	Euro-American	sense_gyrA_616_from_start	2.79236503716806
1-0039	East-Asian	sense_gyrA_616_from_start	0.0391718450768831
1-0044	Euro-American	sense_gyrA_616_from_start	2.64151176403697
1-0045	East-Asian	sense_gyrA_616_from_start	0.188958947234621
1-0047	East-African-Indian	sense_gyrA_616_from_start	2.79236503716806
1-0054	East-Asian	sense_gyrA_616_from_start	0.575751846468847
1-0056	East-Asian	sense_gyrA_616_from_start	0.779665767213341
1-0061	Indo-Oceanic	sense_gyrA_616_from_start	2.78561291727894
1-0064	East-Asian	sense_gyrA_616_from_start	0.654438177806724
1-0066	East-Asian	sense_gyrA_616_from_start	0.231135801923114
1-0069	East-Asian	sense_gyrA_616_from_start	0.884434764494845
1-0071	East-Asian	sense_gyrA_616_from_start	0.132067808216102
1-0084	East-Asian	sense_gyrA_616_from_start	0
1-0102	East-Asian	sense_gyrA_616_from_start	0.523612912578893
1-0107	East-African-Indian	sense_gyrA_616_from_start	2.79236503716806
1-0110	East-Asian	sense_gyrA_616_from_start	0.377796906354448
1-0112	East-Asian	sense_gyrA_616_from_start	0
1-0116	East-Asian	sense_gyrA_616_from_start	0.550267679134607
1-0123	East-Asian	sense_gyrA_616_from_start	0.00619309269840999
1-0137	East-Asian	sense_gyrA_616_from_start	0.330364785615558
1-0149	East-Asian	sense_gyrA_616_from_start	0.02215675734206
1-0150	East-Asian	sense_gyrA_616_from_start	0
1-0153	East-Asian	sense_gyrA_616_from_start	0
1-0156	Euro-American	sense_gyrA_616_from_start	2.79236503716806
2-0013	East-Asian	sense_gyrA_616_from_start	0.219649500865725
2-0021	Euro-American	sense_gyrA_616_from_start	2.79236503716806
2-0022	Euro-American	sense_gyrA_616_from_start	2.79236503716806
2-0023	Euro-American	sense_gyrA_616_from_start	2.79236503716806
2-0028	Euro-American	sense_gyrA_616_from_start	2.79236503716806
2-0029	Euro-American	sense_gyrA_616_from_start	2.79236503716806
2-0034	East-Asian	sense_gyrA_616_from_start	0.424462922948176
2-0043-unknown	Euro-American	sense_gyrA_616_from_start	2.79236503716806
2-0046	Euro-American	sense_gyrA_616_from_start	2.79236503716806
2-0052	East-Asian	sense_gyrA_616_from_start	0.182767262122151
2-0068	East-Asian	sense_gyrA_616_from_start	0.0978136828242905
2-0111	Euro-American	sense_gyrA_616_from_start	2.60597232743475
3-0059	Euro-American	sense_gyrA_616_from_start	2.79236503716806
3-0090	Indo-Oceanic	sense_gyrA_616_from_start	0.0438093419912666
3-0096	Indo-Oceanic	sense_gyrA_616_from_start	0.149778116629797
3-0124	Indo-Oceanic	sense_gyrA_616_from_start	0.0685087048323847
4-0012	Euro-American	sense_gyrA_616_from_start	2.79236503716806
4-0062	East-Asian	sense_gyrA_616_from_start	0.10836862085176
4-0073	Euro-American	sense_gyrA_616_from_start	2.79236503716806
4-0077	East-Asian	sense_gyrA_616_from_start	0.681776662908435
4-0087	Euro-American	sense_gyrA_616_from_start	2.62455283549005
4-0096	East-Asian	sense_gyrA_616_from_start	0.10425672243769
N0054	East-African-Indian	sense_gyrA_616_from_start	2.79236503716806
N0091	M. africanum	sense_gyrA_616_from_start	2.79236503716806
N0153	Indo-Oceanic	sense_gyrA_616_from_start	2.79236503716806
N0157	Indo-Oceanic	sense_gyrA_616_from_start	0.125192249109033
N1063	M. africanum	sense_gyrA_616_from_start	2.79236503716806
N1176	M. africanum	sense_gyrA_616_from_start	2.79236503716806
N1216	Euro-American	sense_gyrA_616_from_start	2.77893388736529
SEA00042	Euro-American	sense_gyrA_616_from_start	2.79236503716806
SEA06535	Euro-American	sense_gyrA_616_from_start	2.62172514942911
SEA07010354	East-African-Indian	sense_gyrA_616_from_start	2.7220577309555
SEA07020250	Euro-American	sense_gyrA_616_from_start	0.866296594074793
SEA08151	Indo-Oceanic	sense_gyrA_616_from_start	2.79236503716806
SEA09020048	Euro-American	sense_gyrA_616_from_start	2.75968933443686
SEA09167	Euro-American	sense_gyrA_616_from_start	2.79236503716806
SEA11020038	Euro-American	sense_gyrA_616_from_start	2.63015142297238
SEA11020057	Euro-American	sense_gyrA_616_from_start	2.79236503716806
SEA11020068	Euro-American	sense_gyrA_616_from_start	2.79236503716806
SEA11020092	Euro-American	sense_gyrA_616_from_start	2.58796537179878
SEA11278	Lineage 7	sense_gyrA_616_from_start	2.76891059914525
SEA12126	Indo-Oceanic	sense_gyrA_616_from_start	2.79236503716806
SEA12202	Indo-Oceanic	sense_gyrA_616_from_start	2.79236503716806
SEA12334	Indo-Oceanic	sense_gyrA_616_from_start	2.67815025386539
SEA13111	Indo-Oceanic	sense_gyrA_616_from_start	2.69447173852215
SEA14117	East-Asian	sense_gyrA_616_from_start	2.79236503716806
SEA14333	Indo-Oceanic	sense_gyrA_616_from_start	2.60348147925461
SEA15228	Indo-Oceanic	sense_gyrA_616_from_start	2.79236503716806
SEA15229	Indo-Oceanic	sense_gyrA_616_from_start	2.79236503716806
SEA15230	Indo-Oceanic	sense_gyrA_616_from_start	2.79236503716806
SEA17020028	East-Asian	sense_gyrA_616_from_start	0
SEA17020030	Euro-American	sense_gyrA_616_from_start	2.62229834905041
1-0006	East-Asian	antisense_Rv0007_119_from_start	0.31819553249607
1-0009	East-Asian	antisense_Rv0007_119_from_start	0
1-0013	East-Asian	antisense_Rv0007_119_from_start	2.79236503716806
1-0017	East-Asian	antisense_Rv0007_119_from_start	0.831360219106618
1-0021	East-African-Indian	antisense_Rv0007_119_from_start	2.79236503716806
1-0028	East-Asian	antisense_Rv0007_119_from_start	0.22149959003675
1-0030	Indo-Oceanic	antisense_Rv0007_119_from_start	2.79236503716806
1-0031	East-Asian	antisense_Rv0007_119_from_start	0.25820010711633
1-0036	Euro-American	antisense_Rv0007_119_from_start	2.79236503716806
1-0039	East-Asian	antisense_Rv0007_119_from_start	0
1-0044	Euro-American	antisense_Rv0007_119_from_start	2.79236503716806
1-0045	East-Asian	antisense_Rv0007_119_from_start	0.204375247524307
1-0047	East-African-Indian	antisense_Rv0007_119_from_start	2.79236503716806
1-0054	East-Asian	antisense_Rv0007_119_from_start	0.557323894556581
1-0056	East-Asian	antisense_Rv0007_119_from_start	0.276954860378465
1-0061	Indo-Oceanic	antisense_Rv0007_119_from_start	2.79236503716806
1-0064	East-Asian	antisense_Rv0007_119_from_start	0.087926529191739
1-0066	East-Asian	antisense_Rv0007_119_from_start	0.757097552996175
1-0069	East-Asian	antisense_Rv0007_119_from_start	0.575286734968516
1-0071	East-Asian	antisense_Rv0007_119_from_start	0.506952496534842
1-0084	East-Asian	antisense_Rv0007_119_from_start	0.454684026198267
1-0102	East-Asian	antisense_Rv0007_119_from_start	0.361097500820885
1-0107	East-African-Indian	antisense_Rv0007_119_from_start	2.78594173628867
1-0110	East-Asian	antisense_Rv0007_119_from_start	0
1-0112	East-Asian	antisense_Rv0007_119_from_start	0.25899284125871
1-0116	East-Asian	antisense_Rv0007_119_from_start	0.422057696854866
1-0123	East-Asian	antisense_Rv0007_119_from_start	0.765115154393155
1-0137	East-Asian	antisense_Rv0007_119_from_start	0
1-0149	East-Asian	antisense_Rv0007_119_from_start	0
1-0150	East-Asian	antisense_Rv0007_119_from_start	0.0533538920527334
1-0153	East-Asian	antisense_Rv0007_119_from_start	0.372603502674455
1-0156	Euro-American	antisense_Rv0007_119_from_start	2.79236503716806
2-0013	East-Asian	antisense_Rv0007_119_from_start	0.138015415806705
2-0021	Euro-American	antisense_Rv0007_119_from_start	2.79236503716806
2-0022	Euro-American	antisense_Rv0007_119_from_start	2.79236503716806
2-0023	Euro-American	antisense_Rv0007_119_from_start	2.79236503716806
2-0028	Euro-American	antisense_Rv0007_119_from_start	2.79236503716806
2-0029	Euro-American	antisense_Rv0007_119_from_start	2.79236503716806
2-0034	East-Asian	antisense_Rv0007_119_from_start	0.496743706791914
2-0043-unknown	Euro-American	antisense_Rv0007_119_from_start	2.79236503716806
2-0046	Euro-American	antisense_Rv0007_119_from_start	2.64123734561298
2-0052	East-Asian	antisense_Rv0007_119_from_start	0.0738080979474952
2-0068	East-Asian	antisense_Rv0007_119_from_start	0.126302239783986
2-0111	Euro-American	antisense_Rv0007_119_from_start	2.62084560391628
3-0059	Euro-American	antisense_Rv0007_119_from_start	2.79236503716806
3-0090	Indo-Oceanic	antisense_Rv0007_119_from_start	0
3-0096	Indo-Oceanic	antisense_Rv0007_119_from_start	0.0845123451636281
3-0124	Indo-Oceanic	antisense_Rv0007_119_from_start	0
4-0012	Euro-American	antisense_Rv0007_119_from_start	2.79236503716806
4-0062	East-Asian	antisense_Rv0007_119_from_start	0.132775698013735
4-0073	Euro-American	antisense_Rv0007_119_from_start	2.79236503716806
4-0077	East-Asian	antisense_Rv0007_119_from_start	0.71415771142173
4-0087	Euro-American	antisense_Rv0007_119_from_start	2.79236503716806
4-0096	East-Asian	antisense_Rv0007_119_from_start	0.832329239719437
N0054	East-African-Indian	antisense_Rv0007_119_from_start	2.79236503716806
N0091	M. africanum	antisense_Rv0007_119_from_start	2.79236503716806
N0153	Indo-Oceanic	antisense_Rv0007_119_from_start	2.79236503716806
N0157	Indo-Oceanic	antisense_Rv0007_119_from_start	0.0897949567963098
N1063	M. africanum	antisense_Rv0007_119_from_start	2.79236503716806
N1176	M. africanum	antisense_Rv0007_119_from_start	2.79236503716806
N1216	Euro-American	antisense_Rv0007_119_from_start	2.79236503716806
SEA00042	Euro-American	antisense_Rv0007_119_from_start	2.70549452955285
SEA06535	Euro-American	antisense_Rv0007_119_from_start	2.79236503716806
SEA07010354	East-African-Indian	antisense_Rv0007_119_from_start	2.79236503716806
SEA07020250	Euro-American	antisense_Rv0007_119_from_start	0.447194017322289
SEA08151	Indo-Oceanic	antisense_Rv0007_119_from_start	2.79236503716806
SEA09020048	Euro-American	antisense_Rv0007_119_from_start	2.79236503716806
SEA09167	Euro-American	antisense_Rv0007_119_from_start	2.79236503716806
SEA11020038	Euro-American	antisense_Rv0007_119_from_start	2.79236503716806
SEA11020057	Euro-American	antisense_Rv0007_119_from_start	2.60217119691631
SEA11020068	Euro-American	antisense_Rv0007_119_from_start	2.79236503716806
SEA11020092	Euro-American	antisense_Rv0007_119_from_start	2.79236503716806
SEA11278	Lineage 7	antisense_Rv0007_119_from_start	2.79236503716806
SEA12126	Indo-Oceanic	antisense_Rv0007_119_from_start	2.79236503716806
SEA12202	Indo-Oceanic	antisense_Rv0007_119_from_start	2.79236503716806
SEA12334	Indo-Oceanic	antisense_Rv0007_119_from_start	2.79236503716806
SEA13111	Indo-Oceanic	antisense_Rv0007_119_from_start	2.79236503716806
SEA14117	East-Asian	antisense_Rv0007_119_from_start	2.79236503716806
SEA14333	Indo-Oceanic	antisense_Rv0007_119_from_start	2.79236503716806
SEA15228	Indo-Oceanic	antisense_Rv0007_119_from_start	2.79236503716806
SEA15229	Indo-Oceanic	antisense_Rv0007_119_from_start	2.79236503716806
SEA15230	Indo-Oceanic	antisense_Rv0007_119_from_start	2.79236503716806
SEA17020028	East-Asian	antisense_Rv0007_119_from_start	0.131581781231669
SEA17020030	Euro-American	antisense_Rv0007_119_from_start	2.79236503716806
1-0006	East-Asian	sense_Rv0007_122_from_start	0.467690525151421
1-0009	East-Asian	sense_Rv0007_122_from_start	0.184876962764531
1-0013	East-Asian	sense_Rv0007_122_from_start	2.79236503716806
1-0017	East-Asian	sense_Rv0007_122_from_start	0.373678382419281
1-0021	East-African-Indian	sense_Rv0007_122_from_start	1.96731955113844
1-0028	East-Asian	sense_Rv0007_122_from_start	0
1-0030	Indo-Oceanic	sense_Rv0007_122_from_start	2.79236503716806
1-0031	East-Asian	sense_Rv0007_122_from_start	0.626362299073553
1-0036	Euro-American	sense_Rv0007_122_from_start	2.37619686571845
1-0039	East-Asian	sense_Rv0007_122_from_start	0
1-0044	Euro-American	sense_Rv0007_122_from_start	2.61684557583426
1-0045	East-Asian	sense_Rv0007_122_from_start	0.0997190893047912
1-0047	East-African-Indian	sense_Rv0007_122_from_start	2.67993612165079
1-0054	East-Asian	sense_Rv0007_122_from_start	0
1-0056	East-Asian	sense_Rv0007_122_from_start	0.338852526111891
1-0061	Indo-Oceanic	sense_Rv0007_122_from_start	2.79236503716806
1-0064	East-Asian	sense_Rv0007_122_from_start	0
1-0066	East-Asian	sense_Rv0007_122_from_start	0.0809871642168232
1-0069	East-Asian	sense_Rv0007_122_from_start	0
1-0071	East-Asian	sense_Rv0007_122_from_start	0.348945567765449
1-0084	East-Asian	sense_Rv0007_122_from_start	0
1-0102	East-Asian	sense_Rv0007_122_from_start	0.358802042833223
1-0107	East-African-Indian	sense_Rv0007_122_from_start	2.46508987796065
1-0110	East-Asian	sense_Rv0007_122_from_start	0.130237681029905
1-0112	East-Asian	sense_Rv0007_122_from_start	0
1-0116	East-Asian	sense_Rv0007_122_from_start	0.505413443350346
1-0123	East-Asian	sense_Rv0007_122_from_start	0.72273409161537
1-0137	East-Asian	sense_Rv0007_122_from_start	0.72182534845294
1-0149	East-Asian	sense_Rv0007_122_from_start	0.591980661225295
1-0150	East-Asian	sense_Rv0007_122_from_start	0
1-0153	East-Asian	sense_Rv0007_122_from_start	0
1-0156	Euro-American	sense_Rv0007_122_from_start	2.79236503716806
2-0013	East-Asian	sense_Rv0007_122_from_start	0.167513925720813
2-0021	Euro-American	sense_Rv0007_122_from_start	2.61668332114639
2-0022	Euro-American	sense_Rv0007_122_from_start	2.79236503716806
2-0023	Euro-American	sense_Rv0007_122_from_start	2.79236503716806
2-0028	Euro-American	sense_Rv0007_122_from_start	2.70055077255821
2-0029	Euro-American	sense_Rv0007_122_from_start	2.79236503716806
2-0034	East-Asian	sense_Rv0007_122_from_start	0
2-0043-unknown	Euro-American	sense_Rv0007_122_from_start	2.79236503716806
2-0046	Euro-American	sense_Rv0007_122_from_start	2.6966120487585
2-0052	East-Asian	sense_Rv0007_122_from_start	0.0280923802262776
2-0068	East-Asian	sense_Rv0007_122_from_start	0.0950709157607521
2-0111	Euro-American	sense_Rv0007_122_from_start	2.79236503716806
3-0059	Euro-American	sense_Rv0007_122_from_start	2.31142673943603
3-0090	Indo-Oceanic	sense_Rv0007_122_from_start	0.0581077250438351
3-0096	Indo-Oceanic	sense_Rv0007_122_from_start	0.142825355988029
3-0124	Indo-Oceanic	sense_Rv0007_122_from_start	0.305066442078411
4-0012	Euro-American	sense_Rv0007_122_from_start	2.61738460334805
4-0062	East-Asian	sense_Rv0007_122_from_start	0
4-0073	Euro-American	sense_Rv0007_122_from_start	2.79236503716806
4-0077	East-Asian	sense_Rv0007_122_from_start	0
4-0087	Euro-American	sense_Rv0007_122_from_start	2.66463027486538
4-0096	East-Asian	sense_Rv0007_122_from_start	0.557078884176003
N0054	East-African-Indian	sense_Rv0007_122_from_start	2.79236503716806
N0091	M. africanum	sense_Rv0007_122_from_start	2.62142160534471
N0153	Indo-Oceanic	sense_Rv0007_122_from_start	2.58498893728802
N0157	Indo-Oceanic	sense_Rv0007_122_from_start	0.0204670194555546
N1063	M. africanum	sense_Rv0007_122_from_start	2.71194812513669
N1176	M. africanum	sense_Rv0007_122_from_start	2.61453509478493
N1216	Euro-American	sense_Rv0007_122_from_start	2.74082516961347
SEA00042	Euro-American	sense_Rv0007_122_from_start	2.4629661484486
SEA06535	Euro-American	sense_Rv0007_122_from_start	2.3567121018402
SEA07010354	East-African-Indian	sense_Rv0007_122_from_start	2.45501533025958
SEA07020250	Euro-American	sense_Rv0007_122_from_start	0.154547955377956
SEA08151	Indo-Oceanic	sense_Rv0007_122_from_start	2.68422367801574
SEA09020048	Euro-American	sense_Rv0007_122_from_start	2.53277077889973
SEA09167	Euro-American	sense_Rv0007_122_from_start	2.79236503716806
SEA11020038	Euro-American	sense_Rv0007_122_from_start	2.79236503716806
SEA11020057	Euro-American	sense_Rv0007_122_from_start	2.68742826461762
SEA11020068	Euro-American	sense_Rv0007_122_from_start	2.65634681389345
SEA11020092	Euro-American	sense_Rv0007_122_from_start	2.41073969465048
SEA11278	Lineage 7	sense_Rv0007_122_from_start	2.79236503716806
SEA12126	Indo-Oceanic	sense_Rv0007_122_from_start	2.62259087617848
SEA12202	Indo-Oceanic	sense_Rv0007_122_from_start	2.68927637750385
SEA12334	Indo-Oceanic	sense_Rv0007_122_from_start	2.66981160431151
SEA13111	Indo-Oceanic	sense_Rv0007_122_from_start	2.79236503716806
SEA14117	East-Asian	sense_Rv0007_122_from_start	2.45275377474348
SEA14333	Indo-Oceanic	sense_Rv0007_122_from_start	2.7053445500288
SEA15228	Indo-Oceanic	sense_Rv0007_122_from_start	2.56734004345918
SEA15229	Indo-Oceanic	sense_Rv0007_122_from_start	2.29444618325835
SEA15230	Indo-Oceanic	sense_Rv0007_122_from_start	2.78105669024675
SEA17020028	East-Asian	sense_Rv0007_122_from_start	0
SEA17020030	Euro-American	sense_Rv0007_122_from_start	2.21955943827961
1-0006	East-Asian	antisense_Rv0007_149_to_stop	0.521540499095675
1-0009	East-Asian	antisense_Rv0007_149_to_stop	0.287644964122135
1-0013	East-Asian	antisense_Rv0007_149_to_stop	2.79236503716806
1-0017	East-Asian	antisense_Rv0007_149_to_stop	0.714715300254348
1-0021	East-African-Indian	antisense_Rv0007_149_to_stop	2.60986723178838
1-0028	East-Asian	antisense_Rv0007_149_to_stop	0.096566369439084
1-0030	Indo-Oceanic	antisense_Rv0007_149_to_stop	2.79236503716806
1-0031	East-Asian	antisense_Rv0007_149_to_stop	0.0956358106252722
1-0036	Euro-American	antisense_Rv0007_149_to_stop	2.23493833476638
1-0039	East-Asian	antisense_Rv0007_149_to_stop	0
1-0044	Euro-American	antisense_Rv0007_149_to_stop	2.79236503716806
1-0045	East-Asian	antisense_Rv0007_149_to_stop	0
1-0047	East-African-Indian	antisense_Rv0007_149_to_stop	2.32123064426162
1-0054	East-Asian	antisense_Rv0007_149_to_stop	0
1-0056	East-Asian	antisense_Rv0007_149_to_stop	0.0103361171956326
1-0061	Indo-Oceanic	antisense_Rv0007_149_to_stop	2.49153442270115
1-0064	East-Asian	antisense_Rv0007_149_to_stop	0
1-0066	East-Asian	antisense_Rv0007_149_to_stop	0
1-0069	East-Asian	antisense_Rv0007_149_to_stop	0.137496584253861
1-0071	East-Asian	antisense_Rv0007_149_to_stop	0.428949984533569
1-0084	East-Asian	antisense_Rv0007_149_to_stop	0
1-0102	East-Asian	antisense_Rv0007_149_to_stop	0.0110875683979937
1-0107	East-African-Indian	antisense_Rv0007_149_to_stop	2.5106245836929
1-0110	East-Asian	antisense_Rv0007_149_to_stop	0.0422500007362866
1-0112	East-Asian	antisense_Rv0007_149_to_stop	0.265362366134438
1-0116	East-Asian	antisense_Rv0007_149_to_stop	0.0216055755766935
1-0123	East-Asian	antisense_Rv0007_149_to_stop	0.122733591120331
1-0137	East-Asian	antisense_Rv0007_149_to_stop	0.0153159379163221
1-0149	East-Asian	antisense_Rv0007_149_to_stop	0.276884599820358
1-0150	East-Asian	antisense_Rv0007_149_to_stop	0.966224264209343
1-0153	East-Asian	antisense_Rv0007_149_to_stop	0.251217107901881
1-0156	Euro-American	antisense_Rv0007_149_to_stop	2.79236503716806
2-0013	East-Asian	antisense_Rv0007_149_to_stop	0
2-0021	Euro-American	antisense_Rv0007_149_to_stop	2.75648673630974
2-0022	Euro-American	antisense_Rv0007_149_to_stop	2.79236503716806
2-0023	Euro-American	antisense_Rv0007_149_to_stop	2.73293644389163
2-0028	Euro-American	antisense_Rv0007_149_to_stop	2.79236503716806
2-0029	Euro-American	antisense_Rv0007_149_to_stop	2.62393090708897
2-0034	East-Asian	antisense_Rv0007_149_to_stop	0.503878207581285
2-0043-unknown	Euro-American	antisense_Rv0007_149_to_stop	2.54897002709657
2-0046	Euro-American	antisense_Rv0007_149_to_stop	2.65004623008197
2-0052	East-Asian	antisense_Rv0007_149_to_stop	0.0280923802262776
2-0068	East-Asian	antisense_Rv0007_149_to_stop	0.45091441924256
2-0111	Euro-American	antisense_Rv0007_149_to_stop	2.68959395148946
3-0059	Euro-American	antisense_Rv0007_149_to_stop	2.4350595948801
3-0090	Indo-Oceanic	antisense_Rv0007_149_to_stop	0.301084478536375
3-0096	Indo-Oceanic	antisense_Rv0007_149_to_stop	0
3-0124	Indo-Oceanic	antisense_Rv0007_149_to_stop	0.488951587133319
4-0012	Euro-American	antisense_Rv0007_149_to_stop	2.78337877328386
4-0062	East-Asian	antisense_Rv0007_149_to_stop	0.228991013273038
4-0073	Euro-American	antisense_Rv0007_149_to_stop	2.79236503716806
4-0077	East-Asian	antisense_Rv0007_149_to_stop	0.871576299825698
4-0087	Euro-American	antisense_Rv0007_149_to_stop	2.79236503716806
4-0096	East-Asian	antisense_Rv0007_149_to_stop	0.0213203814556174
N0054	East-African-Indian	antisense_Rv0007_149_to_stop	2.79236503716806
N0091	M. africanum	antisense_Rv0007_149_to_stop	2.79236503716806
N0153	Indo-Oceanic	antisense_Rv0007_149_to_stop	2.79236503716806
N0157	Indo-Oceanic	antisense_Rv0007_149_to_stop	0
N1063	M. africanum	antisense_Rv0007_149_to_stop	2.79236503716806
N1176	M. africanum	antisense_Rv0007_149_to_stop	2.42102621377858
N1216	Euro-American	antisense_Rv0007_149_to_stop	2.79236503716806
SEA00042	Euro-American	antisense_Rv0007_149_to_stop	2.16827344585313
SEA06535	Euro-American	antisense_Rv0007_149_to_stop	2.79167694310952
SEA07010354	East-African-Indian	antisense_Rv0007_149_to_stop	2.5008019165012
SEA07020250	Euro-American	antisense_Rv0007_149_to_stop	0
SEA08151	Indo-Oceanic	antisense_Rv0007_149_to_stop	2.79236503716806
SEA09020048	Euro-American	antisense_Rv0007_149_to_stop	2.68695543120677
SEA09167	Euro-American	antisense_Rv0007_149_to_stop	2.77252179999101
SEA11020038	Euro-American	antisense_Rv0007_149_to_stop	2.53068580186465
SEA11020057	Euro-American	antisense_Rv0007_149_to_stop	2.36875846761348
SEA11020068	Euro-American	antisense_Rv0007_149_to_stop	2.75655427535177
SEA11020092	Euro-American	antisense_Rv0007_149_to_stop	2.79236503716806
SEA11278	Lineage 7	antisense_Rv0007_149_to_stop	2.67164336268974
SEA12126	Indo-Oceanic	antisense_Rv0007_149_to_stop	2.79236503716806
SEA12202	Indo-Oceanic	antisense_Rv0007_149_to_stop	2.64813297448142
SEA12334	Indo-Oceanic	antisense_Rv0007_149_to_stop	2.26670378330033
SEA13111	Indo-Oceanic	antisense_Rv0007_149_to_stop	2.51680968990563
SEA14117	East-Asian	antisense_Rv0007_149_to_stop	2.76383688568799
SEA14333	Indo-Oceanic	antisense_Rv0007_149_to_stop	2.79236503716806
SEA15228	Indo-Oceanic	antisense_Rv0007_149_to_stop	2.7410235548078
SEA15229	Indo-Oceanic	antisense_Rv0007_149_to_stop	2.76006864937821
SEA15230	Indo-Oceanic	antisense_Rv0007_149_to_stop	2.57460581277932
SEA17020028	East-Asian	antisense_Rv0007_149_to_stop	0
SEA17020030	Euro-American	antisense_Rv0007_149_to_stop	2.79236503716806
1-0006	East-Asian	sense_Rv0007_146_to_stop	0.100964816275401
1-0009	East-Asian	sense_Rv0007_146_to_stop	0.430958235317127
1-0013	East-Asian	sense_Rv0007_146_to_stop	2.79236503716806
1-0017	East-Asian	sense_Rv0007_146_to_stop	0.647047997187846
1-0021	East-African-Indian	sense_Rv0007_146_to_stop	2.79236503716806
1-0028	East-Asian	sense_Rv0007_146_to_stop	0.660340711685976
1-0030	Indo-Oceanic	sense_Rv0007_146_to_stop	2.79236503716806
1-0031	East-Asian	sense_Rv0007_146_to_stop	0.871176984007083
1-0036	Euro-American	sense_Rv0007_146_to_stop	2.64647433009028
1-0039	East-Asian	sense_Rv0007_146_to_stop	0
1-0044	Euro-American	sense_Rv0007_146_to_stop	2.79236503716806
1-0045	East-Asian	sense_Rv0007_146_to_stop	0.00459308309188675
1-0047	East-African-Indian	sense_Rv0007_146_to_stop	2.79236503716806
1-0054	East-Asian	sense_Rv0007_146_to_stop	0.0460935192236555
1-0056	East-Asian	sense_Rv0007_146_to_stop	0.291203816116745
1-0061	Indo-Oceanic	sense_Rv0007_146_to_stop	2.79236503716806
1-0064	East-Asian	sense_Rv0007_146_to_stop	0
1-0066	East-Asian	sense_Rv0007_146_to_stop	0.357736853213295
1-0069	East-Asian	sense_Rv0007_146_to_stop	0
1-0071	East-Asian	sense_Rv0007_146_to_stop	0.370878854008315
1-0084	East-Asian	sense_Rv0007_146_to_stop	0.253719991725268
1-0102	East-Asian	sense_Rv0007_146_to_stop	0.0740099113097044
1-0107	East-African-Indian	sense_Rv0007_146_to_stop	2.76991884413719
1-0110	East-Asian	sense_Rv0007_146_to_stop	0
1-0112	East-Asian	sense_Rv0007_146_to_stop	0.32633914958511
1-0116	East-Asian	sense_Rv0007_146_to_stop	0.497291282328898
1-0123	East-Asian	sense_Rv0007_146_to_stop	0
1-0137	East-Asian	sense_Rv0007_146_to_stop	0.313476858185137
1-0149	East-Asian	sense_Rv0007_146_to_stop	0
1-0150	East-Asian	sense_Rv0007_146_to_stop	0
1-0153	East-Asian	sense_Rv0007_146_to_stop	0.807759436173491
1-0156	Euro-American	sense_Rv0007_146_to_stop	2.39757114138697
2-0013	East-Asian	sense_Rv0007_146_to_stop	0
2-0021	Euro-American	sense_Rv0007_146_to_stop	2.79236503716806
2-0022	Euro-American	sense_Rv0007_146_to_stop	2.79236503716806
2-0023	Euro-American	sense_Rv0007_146_to_stop	2.79236503716806
2-0028	Euro-American	sense_Rv0007_146_to_stop	2.79236503716806
2-0029	Euro-American	sense_Rv0007_146_to_stop	2.79236503716806
2-0034	East-Asian	sense_Rv0007_146_to_stop	0.2143715903863
2-0043-unknown	Euro-American	sense_Rv0007_146_to_stop	2.79236503716806
2-0046	Euro-American	sense_Rv0007_146_to_stop	2.79236503716806
2-0052	East-Asian	sense_Rv0007_146_to_stop	0
2-0068	East-Asian	sense_Rv0007_146_to_stop	0.0881910980455152
2-0111	Euro-American	sense_Rv0007_146_to_stop	2.53788812870361
3-0059	Euro-American	sense_Rv0007_146_to_stop	2.79236503716806
3-0090	Indo-Oceanic	sense_Rv0007_146_to_stop	0.174241458989726
3-0096	Indo-Oceanic	sense_Rv0007_146_to_stop	0
3-0124	Indo-Oceanic	sense_Rv0007_146_to_stop	0.244997607812967
4-0012	Euro-American	sense_Rv0007_146_to_stop	2.79236503716806
4-0062	East-Asian	sense_Rv0007_146_to_stop	0.495793888922744
4-0073	Euro-American	sense_Rv0007_146_to_stop	2.79236503716806
4-0077	East-Asian	sense_Rv0007_146_to_stop	0.256392856601614
4-0087	Euro-American	sense_Rv0007_146_to_stop	2.79236503716806
4-0096	East-Asian	sense_Rv0007_146_to_stop	0.335831004780497
N0054	East-African-Indian	sense_Rv0007_146_to_stop	2.79236503716806
N0091	M. africanum	sense_Rv0007_146_to_stop	2.79236503716806
N0153	Indo-Oceanic	sense_Rv0007_146_to_stop	2.79236503716806
N0157	Indo-Oceanic	sense_Rv0007_146_to_stop	0
N1063	M. africanum	sense_Rv0007_146_to_stop	2.79236503716806
N1176	M. africanum	sense_Rv0007_146_to_stop	2.79236503716806
N1216	Euro-American	sense_Rv0007_146_to_stop	2.79236503716806
SEA00042	Euro-American	sense_Rv0007_146_to_stop	2.79236503716806
SEA06535	Euro-American	sense_Rv0007_146_to_stop	2.79236503716806
SEA07010354	East-African-Indian	sense_Rv0007_146_to_stop	2.79236503716806
SEA07020250	Euro-American	sense_Rv0007_146_to_stop	0.849145757581473
SEA08151	Indo-Oceanic	sense_Rv0007_146_to_stop	2.79236503716806
SEA09020048	Euro-American	sense_Rv0007_146_to_stop	2.70103061641849
SEA09167	Euro-American	sense_Rv0007_146_to_stop	2.79236503716806
SEA11020038	Euro-American	sense_Rv0007_146_to_stop	2.40591890737574
SEA11020057	Euro-American	sense_Rv0007_146_to_stop	2.79236503716806
SEA11020068	Euro-American	sense_Rv0007_146_to_stop	2.79236503716806
SEA11020092	Euro-American	sense_Rv0007_146_to_stop	2.79236503716806
SEA11278	Lineage 7	sense_Rv0007_146_to_stop	2.79236503716806
SEA12126	Indo-Oceanic	sense_Rv0007_146_to_stop	2.79236503716806
SEA12202	Indo-Oceanic	sense_Rv0007_146_to_stop	2.79236503716806
SEA12334	Indo-Oceanic	sense_Rv0007_146_to_stop	2.79236503716806
SEA13111	Indo-Oceanic	sense_Rv0007_146_to_stop	2.79236503716806
SEA14117	East-Asian	sense_Rv0007_146_to_stop	2.72094279250066
SEA14333	Indo-Oceanic	sense_Rv0007_146_to_stop	2.79236503716806
SEA15228	Indo-Oceanic	sense_Rv0007_146_to_stop	2.79236503716806
SEA15229	Indo-Oceanic	sense_Rv0007_146_to_stop	2.79236503716806
SEA15230	Indo-Oceanic	sense_Rv0007_146_to_stop	2.79236503716806
SEA17020028	East-Asian	sense_Rv0007_146_to_stop	0.110068688610219
SEA17020030	Euro-American	sense_Rv0007_146_to_stop	2.7065655705237
1-0006	East-Asian	sense_pstP_388_to_stop	1.88070942183301
1-0009	East-Asian	sense_pstP_388_to_stop	2.38034231288578
1-0013	East-Asian	sense_pstP_388_to_stop	2.63813409737764
1-0017	East-Asian	sense_pstP_388_to_stop	2.01631200676441
1-0021	East-African-Indian	sense_pstP_388_to_stop	2.79236503716806
1-0028	East-Asian	sense_pstP_388_to_stop	1.81694493463351
1-0030	Indo-Oceanic	sense_pstP_388_to_stop	2.61840730068676
1-0031	East-Asian	sense_pstP_388_to_stop	1.61488190660209
1-0036	Euro-American	sense_pstP_388_to_stop	2.61480611624336
1-0039	East-Asian	sense_pstP_388_to_stop	1.41173605298008
1-0044	Euro-American	sense_pstP_388_to_stop	2.78278129356298
1-0045	East-Asian	sense_pstP_388_to_stop	1.44129827177353
1-0047	East-African-Indian	sense_pstP_388_to_stop	2.6473448002356
1-0054	East-Asian	sense_pstP_388_to_stop	1.47135495263782
1-0056	East-Asian	sense_pstP_388_to_stop	1.85753529354453
1-0061	Indo-Oceanic	sense_pstP_388_to_stop	2.66325404440335
1-0064	East-Asian	sense_pstP_388_to_stop	1.54517700857281
1-0066	East-Asian	sense_pstP_388_to_stop	1.42048512711998
1-0069	East-Asian	sense_pstP_388_to_stop	1.12773447326409
1-0071	East-Asian	sense_pstP_388_to_stop	1.5866915217945
1-0084	East-Asian	sense_pstP_388_to_stop	0.518037363442535
1-0102	East-Asian	sense_pstP_388_to_stop	1.12892405869185
1-0107	East-African-Indian	sense_pstP_388_to_stop	2.62120218348178
1-0110	East-Asian	sense_pstP_388_to_stop	1.14208310652017
1-0112	East-Asian	sense_pstP_388_to_stop	1.7728636464431
1-0116	East-Asian	sense_pstP_388_to_stop	2.17809682946762
1-0123	East-Asian	sense_pstP_388_to_stop	1.92033779146987
1-0137	East-Asian	sense_pstP_388_to_stop	1.8284139956237
1-0149	East-Asian	sense_pstP_388_to_stop	1.90984482373276
1-0150	East-Asian	sense_pstP_388_to_stop	1.16542866360776
1-0153	East-Asian	sense_pstP_388_to_stop	1.3155633529905
1-0156	Euro-American	sense_pstP_388_to_stop	2.79236503716806
2-0013	East-Asian	sense_pstP_388_to_stop	0.630199609152255
2-0021	Euro-American	sense_pstP_388_to_stop	2.32731194858144
2-0022	Euro-American	sense_pstP_388_to_stop	2.31518238346208
2-0023	Euro-American	sense_pstP_388_to_stop	2.31062716746906
2-0028	Euro-American	sense_pstP_388_to_stop	2.73717541483104
2-0029	Euro-American	sense_pstP_388_to_stop	2.38995209960603
2-0034	East-Asian	sense_pstP_388_to_stop	1.14435500375544
2-0043-unknown	Euro-American	sense_pstP_388_to_stop	2.66647224717694
2-0046	Euro-American	sense_pstP_388_to_stop	2.58824258833975
2-0052	East-Asian	sense_pstP_388_to_stop	1.90204958647524
2-0068	East-Asian	sense_pstP_388_to_stop	0.674072805577563
2-0111	Euro-American	sense_pstP_388_to_stop	2.34905965554031
3-0059	Euro-American	sense_pstP_388_to_stop	2.55394507523569
3-0090	Indo-Oceanic	sense_pstP_388_to_stop	0.102932924287436
3-0096	Indo-Oceanic	sense_pstP_388_to_stop	0.196188581586755
3-0124	Indo-Oceanic	sense_pstP_388_to_stop	0
4-0012	Euro-American	sense_pstP_388_to_stop	2.79236503716806
4-0062	East-Asian	sense_pstP_388_to_stop	1.48477488796259
4-0073	Euro-American	sense_pstP_388_to_stop	2.79236503716806
4-0077	East-Asian	sense_pstP_388_to_stop	1.91555952234706
4-0087	Euro-American	sense_pstP_388_to_stop	2.73341331552019
4-0096	East-Asian	sense_pstP_388_to_stop	1.66118728751674
N0054	East-African-Indian	sense_pstP_388_to_stop	2.7881699990848
N0091	M. africanum	sense_pstP_388_to_stop	2.56354737770051
N0153	Indo-Oceanic	sense_pstP_388_to_stop	2.79236503716806
N0157	Indo-Oceanic	sense_pstP_388_to_stop	0
N1063	M. africanum	sense_pstP_388_to_stop	2.76627760213199
N1176	M. africanum	sense_pstP_388_to_stop	2.68961829866738
N1216	Euro-American	sense_pstP_388_to_stop	2.79236503716806
SEA00042	Euro-American	sense_pstP_388_to_stop	2.79236503716806
SEA06535	Euro-American	sense_pstP_388_to_stop	2.47515070439617
SEA07010354	East-African-Indian	sense_pstP_388_to_stop	2.79236503716806
SEA07020250	Euro-American	sense_pstP_388_to_stop	1.87277698696258
SEA08151	Indo-Oceanic	sense_pstP_388_to_stop	2.79236503716806
SEA09020048	Euro-American	sense_pstP_388_to_stop	2.79236503716806
SEA09167	Euro-American	sense_pstP_388_to_stop	2.59237088735171
SEA11020038	Euro-American	sense_pstP_388_to_stop	2.79236503716806
SEA11020057	Euro-American	sense_pstP_388_to_stop	2.79236503716806
SEA11020068	Euro-American	sense_pstP_388_to_stop	2.65359532855679
SEA11020092	Euro-American	sense_pstP_388_to_stop	2.77704306110134
SEA11278	Lineage 7	sense_pstP_388_to_stop	2.54619601582728
SEA12126	Indo-Oceanic	sense_pstP_388_to_stop	2.63928033654942
SEA12202	Indo-Oceanic	sense_pstP_388_to_stop	2.40146518813371
SEA12334	Indo-Oceanic	sense_pstP_388_to_stop	2.67590131336183
SEA13111	Indo-Oceanic	sense_pstP_388_to_stop	2.79236503716806
SEA14117	East-Asian	sense_pstP_388_to_stop	2.75548830439753
SEA14333	Indo-Oceanic	sense_pstP_388_to_stop	2.72532772822684
SEA15228	Indo-Oceanic	sense_pstP_388_to_stop	2.75639109159076
SEA15229	Indo-Oceanic	sense_pstP_388_to_stop	2.66022464177165
SEA15230	Indo-Oceanic	sense_pstP_388_to_stop	2.64325589186007
SEA17020028	East-Asian	sense_pstP_388_to_stop	1.00617222068351
SEA17020030	Euro-American	sense_pstP_388_to_stop	2.79236503716806
1-0006	East-Asian	antisense_pstP_391_to_stop	1.33421575308654
1-0009	East-Asian	antisense_pstP_391_to_stop	1.23326961727703
1-0013	East-Asian	antisense_pstP_391_to_stop	2.29109470803026
1-0017	East-Asian	antisense_pstP_391_to_stop	1.50551315608252
1-0021	East-African-Indian	antisense_pstP_391_to_stop	2.60167007882176
1-0028	East-Asian	antisense_pstP_391_to_stop	1.20296930724188
1-0030	Indo-Oceanic	antisense_pstP_391_to_stop	2.29496199209069
1-0031	East-Asian	antisense_pstP_391_to_stop	1.07762786147451
1-0036	Euro-American	antisense_pstP_391_to_stop	2.79236503716806
1-0039	East-Asian	antisense_pstP_391_to_stop	0.756201486415913
1-0044	Euro-American	antisense_pstP_391_to_stop	2.78733957552528
1-0045	East-Asian	antisense_pstP_391_to_stop	1.39837740486931
1-0047	East-African-Indian	antisense_pstP_391_to_stop	2.35759930647066
1-0054	East-Asian	antisense_pstP_391_to_stop	0.840872811661912
1-0056	East-Asian	antisense_pstP_391_to_stop	1.69556781388114
1-0061	Indo-Oceanic	antisense_pstP_391_to_stop	2.45498091968968
1-0064	East-Asian	antisense_pstP_391_to_stop	0.743972127974378
1-0066	East-Asian	antisense_pstP_391_to_stop	1.27603591838734
1-0069	East-Asian	antisense_pstP_391_to_stop	1.72338537395765
1-0071	East-Asian	antisense_pstP_391_to_stop	1.01623379716485
1-0084	East-Asian	antisense_pstP_391_to_stop	0.12070186589715
1-0102	East-Asian	antisense_pstP_391_to_stop	0
1-0107	East-African-Indian	antisense_pstP_391_to_stop	2.5210112019246
1-0110	East-Asian	antisense_pstP_391_to_stop	0.389535742811215
1-0112	East-Asian	antisense_pstP_391_to_stop	0.286810785398472
1-0116	East-Asian	antisense_pstP_391_to_stop	1.47109243274249
1-0123	East-Asian	antisense_pstP_391_to_stop	1.22198579968539
1-0137	East-Asian	antisense_pstP_391_to_stop	0.911725049656518
1-0149	East-Asian	antisense_pstP_391_to_stop	0.832520429272002
1-0150	East-Asian	antisense_pstP_391_to_stop	0.306963047357349
1-0153	East-Asian	antisense_pstP_391_to_stop	0
1-0156	Euro-American	antisense_pstP_391_to_stop	2.73622047896525
2-0013	East-Asian	antisense_pstP_391_to_stop	0
2-0021	Euro-American	antisense_pstP_391_to_stop	2.41279577196644
2-0022	Euro-American	antisense_pstP_391_to_stop	2.0117506321921
2-0023	Euro-American	antisense_pstP_391_to_stop	2.67456610702094
2-0028	Euro-American	antisense_pstP_391_to_stop	2.54006027800877
2-0029	Euro-American	antisense_pstP_391_to_stop	2.4434216770533
2-0034	East-Asian	antisense_pstP_391_to_stop	0.638698851582403
2-0043-unknown	Euro-American	antisense_pstP_391_to_stop	2.55875104788916
2-0046	Euro-American	antisense_pstP_391_to_stop	2.63951824330961
2-0052	East-Asian	antisense_pstP_391_to_stop	0.773198506971933
2-0068	East-Asian	antisense_pstP_391_to_stop	0.276692482260735
2-0111	Euro-American	antisense_pstP_391_to_stop	2.31066874989685
3-0059	Euro-American	antisense_pstP_391_to_stop	2.6018967779535
3-0090	Indo-Oceanic	antisense_pstP_391_to_stop	0.0609504748126605
3-0096	Indo-Oceanic	antisense_pstP_391_to_stop	0
3-0124	Indo-Oceanic	antisense_pstP_391_to_stop	0
4-0012	Euro-American	antisense_pstP_391_to_stop	2.70607106838365
4-0062	East-Asian	antisense_pstP_391_to_stop	1.24897671873043
4-0073	Euro-American	antisense_pstP_391_to_stop	2.38294988318403
4-0077	East-Asian	antisense_pstP_391_to_stop	1.17988262414942
4-0087	Euro-American	antisense_pstP_391_to_stop	2.38169631159388
4-0096	East-Asian	antisense_pstP_391_to_stop	1.21600925179676
N0054	East-African-Indian	antisense_pstP_391_to_stop	2.60700024047486
N0091	M. africanum	antisense_pstP_391_to_stop	2.69608539497628
N0153	Indo-Oceanic	antisense_pstP_391_to_stop	2.69108058438003
N0157	Indo-Oceanic	antisense_pstP_391_to_stop	0
N1063	M. africanum	antisense_pstP_391_to_stop	2.55080688423504
N1176	M. africanum	antisense_pstP_391_to_stop	2.50982688308182
N1216	Euro-American	antisense_pstP_391_to_stop	2.62829180494116
SEA00042	Euro-American	antisense_pstP_391_to_stop	2.37903731619164
SEA06535	Euro-American	antisense_pstP_391_to_stop	2.45742563543866
SEA07010354	East-African-Indian	antisense_pstP_391_to_stop	2.21209039166081
SEA07020250	Euro-American	antisense_pstP_391_to_stop	1.72077389351753
SEA08151	Indo-Oceanic	antisense_pstP_391_to_stop	2.27965317778797
SEA09020048	Euro-American	antisense_pstP_391_to_stop	2.42035779842027
SEA09167	Euro-American	antisense_pstP_391_to_stop	2.79236503716806
SEA11020038	Euro-American	antisense_pstP_391_to_stop	2.79236503716806
SEA11020057	Euro-American	antisense_pstP_391_to_stop	2.35239288778479
SEA11020068	Euro-American	antisense_pstP_391_to_stop	2.48636454333096
SEA11020092	Euro-American	antisense_pstP_391_to_stop	2.53681234556295
SEA11278	Lineage 7	antisense_pstP_391_to_stop	2.79236503716806
SEA12126	Indo-Oceanic	antisense_pstP_391_to_stop	2.71427156639983
SEA12202	Indo-Oceanic	antisense_pstP_391_to_stop	2.70649197244467
SEA12334	Indo-Oceanic	antisense_pstP_391_to_stop	2.56992071043783
SEA13111	Indo-Oceanic	antisense_pstP_391_to_stop	2.7462453882462
SEA14117	East-Asian	antisense_pstP_391_to_stop	2.24825710690894
SEA14333	Indo-Oceanic	antisense_pstP_391_to_stop	2.44975196395482
SEA15228	Indo-Oceanic	antisense_pstP_391_to_stop	2.38329473849259
SEA15229	Indo-Oceanic	antisense_pstP_391_to_stop	2.69247136757691
SEA15230	Indo-Oceanic	antisense_pstP_391_to_stop	2.51381226804169
SEA17020028	East-Asian	antisense_pstP_391_to_stop	0
SEA17020030	Euro-American	antisense_pstP_391_to_stop	2.56474871634042
1-0006	East-Asian	sense_Rv0021c_185_from_start	0.412870288554137
1-0009	East-Asian	sense_Rv0021c_185_from_start	0.770738058993336
1-0017	East-Asian	sense_Rv0021c_185_from_start	0.502411696541484
1-0028	East-Asian	sense_Rv0021c_185_from_start	0.321824124469921
1-0030	Indo-Oceanic	sense_Rv0021c_185_from_start	2.79236503716806
1-0031	East-Asian	sense_Rv0021c_185_from_start	1.22711973576351
1-0036	Euro-American	sense_Rv0021c_185_from_start	2.79236503716806
1-0039	East-Asian	sense_Rv0021c_185_from_start	0.398178912895354
1-0044	Euro-American	sense_Rv0021c_185_from_start	2.79236503716806
1-0045	East-Asian	sense_Rv0021c_185_from_start	0.237222613054726
1-0054	East-Asian	sense_Rv0021c_185_from_start	0.267491869659554
1-0056	East-Asian	sense_Rv0021c_185_from_start	0.599598755350414
1-0061	Indo-Oceanic	sense_Rv0021c_185_from_start	2.79236503716806
1-0064	East-Asian	sense_Rv0021c_185_from_start	0.622665831752244
1-0066	East-Asian	sense_Rv0021c_185_from_start	0.596842796054238
1-0069	East-Asian	sense_Rv0021c_185_from_start	0.66769052384384
1-0071	East-Asian	sense_Rv0021c_185_from_start	1.07382801173228
1-0084	East-Asian	sense_Rv0021c_185_from_start	0.413914420395969
1-0102	East-Asian	sense_Rv0021c_185_from_start	0.74629805889167
1-0110	East-Asian	sense_Rv0021c_185_from_start	0.157956017623975
1-0112	East-Asian	sense_Rv0021c_185_from_start	0.776881676386138
1-0116	East-Asian	sense_Rv0021c_185_from_start	0.906718152139417
1-0123	East-Asian	sense_Rv0021c_185_from_start	0.756007200904873
1-0137	East-Asian	sense_Rv0021c_185_from_start	0
1-0149	East-Asian	sense_Rv0021c_185_from_start	0.188395856082702
1-0150	East-Asian	sense_Rv0021c_185_from_start	0.301842562688748
1-0153	East-Asian	sense_Rv0021c_185_from_start	0.595321993633918
1-0156	Euro-American	sense_Rv0021c_185_from_start	2.79236503716806
2-0013	East-Asian	sense_Rv0021c_185_from_start	0.489707441460895
2-0021	Euro-American	sense_Rv0021c_185_from_start	2.79236503716806
2-0022	Euro-American	sense_Rv0021c_185_from_start	2.79236503716806
2-0023	Euro-American	sense_Rv0021c_185_from_start	2.79236503716806
2-0028	Euro-American	sense_Rv0021c_185_from_start	2.54495824584652
2-0029	Euro-American	sense_Rv0021c_185_from_start	2.79236503716806
2-0034	East-Asian	sense_Rv0021c_185_from_start	0.476162829369462
2-0043-unknown	Euro-American	sense_Rv0021c_185_from_start	2.56284961610278
2-0046	Euro-American	sense_Rv0021c_185_from_start	2.79236503716806
2-0052	East-Asian	sense_Rv0021c_185_from_start	0.0778931267482341
2-0068	East-Asian	sense_Rv0021c_185_from_start	0.616901052325257
2-0111	Euro-American	sense_Rv0021c_185_from_start	2.79236503716806
3-0059	Euro-American	sense_Rv0021c_185_from_start	2.79236503716806
3-0090	Indo-Oceanic	sense_Rv0021c_185_from_start	0.419887156608629
3-0096	Indo-Oceanic	sense_Rv0021c_185_from_start	0
3-0124	Indo-Oceanic	sense_Rv0021c_185_from_start	0
4-0012	Euro-American	sense_Rv0021c_185_from_start	2.79236503716806
4-0062	East-Asian	sense_Rv0021c_185_from_start	0.681890181036202
4-0073	Euro-American	sense_Rv0021c_185_from_start	2.79236503716806
4-0077	East-Asian	sense_Rv0021c_185_from_start	0.900004708152215
4-0087	Euro-American	sense_Rv0021c_185_from_start	2.79236503716806
4-0096	East-Asian	sense_Rv0021c_185_from_start	0.308108229428647
N0091	M. africanum	sense_Rv0021c_185_from_start	2.79236503716806
N0153	Indo-Oceanic	sense_Rv0021c_185_from_start	2.79236503716806
N0157	Indo-Oceanic	sense_Rv0021c_185_from_start	0.205782555599461
N1063	M. africanum	sense_Rv0021c_185_from_start	2.79236503716806
N1176	M. africanum	sense_Rv0021c_185_from_start	2.7175591054825
N1216	Euro-American	sense_Rv0021c_185_from_start	2.79236503716806
SEA00042	Euro-American	sense_Rv0021c_185_from_start	2.79236503716806
SEA06535	Euro-American	sense_Rv0021c_185_from_start	2.79236503716806
SEA07020250	Euro-American	sense_Rv0021c_185_from_start	1.44665114053662
SEA08151	Indo-Oceanic	sense_Rv0021c_185_from_start	2.79236503716806
SEA09020048	Euro-American	sense_Rv0021c_185_from_start	2.79236503716806
SEA09167	Euro-American	sense_Rv0021c_185_from_start	2.79236503716806
SEA11020038	Euro-American	sense_Rv0021c_185_from_start	2.72342938530063
SEA11020057	Euro-American	sense_Rv0021c_185_from_start	2.79236503716806
SEA11020068	Euro-American	sense_Rv0021c_185_from_start	2.79236503716806
SEA11020092	Euro-American	sense_Rv0021c_185_from_start	2.79236503716806
SEA11278	Lineage 7	sense_Rv0021c_185_from_start	2.79236503716806
SEA12126	Indo-Oceanic	sense_Rv0021c_185_from_start	2.79236503716806
SEA12202	Indo-Oceanic	sense_Rv0021c_185_from_start	2.72617250761566
SEA12334	Indo-Oceanic	sense_Rv0021c_185_from_start	2.79236503716806
SEA13111	Indo-Oceanic	sense_Rv0021c_185_from_start	2.79236503716806
SEA14117	East-Asian	sense_Rv0021c_185_from_start	2.79236503716806
SEA14333	Indo-Oceanic	sense_Rv0021c_185_from_start	2.79236503716806
SEA15228	Indo-Oceanic	sense_Rv0021c_185_from_start	2.76668843820115
SEA15229	Indo-Oceanic	sense_Rv0021c_185_from_start	2.79236503716806
SEA15230	Indo-Oceanic	sense_Rv0021c_185_from_start	2.79236503716806
SEA17020028	East-Asian	sense_Rv0021c_185_from_start	0.443599929697202
SEA17020030	Euro-American	sense_Rv0021c_185_from_start	2.79236503716806
1-0006	East-Asian	antisense_Rv0021c_182_from_start	0.103736565525455
1-0009	East-Asian	antisense_Rv0021c_182_from_start	0.780585844949683
1-0017	East-Asian	antisense_Rv0021c_182_from_start	0.656379821709151
1-0028	East-Asian	antisense_Rv0021c_182_from_start	0.92466814475478
1-0030	Indo-Oceanic	antisense_Rv0021c_182_from_start	2.79236503716806
1-0031	East-Asian	antisense_Rv0021c_182_from_start	0.201764161486615
1-0036	Euro-American	antisense_Rv0021c_182_from_start	2.79236503716806
1-0039	East-Asian	antisense_Rv0021c_182_from_start	0.204073699279487
1-0044	Euro-American	antisense_Rv0021c_182_from_start	2.79236503716806
1-0045	East-Asian	antisense_Rv0021c_182_from_start	0.0803537644378601
1-0054	East-Asian	antisense_Rv0021c_182_from_start	0.202819022911109
1-0056	East-Asian	antisense_Rv0021c_182_from_start	0.473026592065892
1-0061	Indo-Oceanic	antisense_Rv0021c_182_from_start	2.79236503716806
1-0064	East-Asian	antisense_Rv0021c_182_from_start	0
1-0066	East-Asian	antisense_Rv0021c_182_from_start	0.787117994435771
1-0069	East-Asian	antisense_Rv0021c_182_from_start	0.45886862014768
1-0071	East-Asian	antisense_Rv0021c_182_from_start	0.272034043653119
1-0084	East-Asian	antisense_Rv0021c_182_from_start	0.122108687111396
1-0102	East-Asian	antisense_Rv0021c_182_from_start	0
1-0110	East-Asian	antisense_Rv0021c_182_from_start	0
1-0112	East-Asian	antisense_Rv0021c_182_from_start	0.65701382253826
1-0116	East-Asian	antisense_Rv0021c_182_from_start	0.799331132327639
1-0123	East-Asian	antisense_Rv0021c_182_from_start	0
1-0137	East-Asian	antisense_Rv0021c_182_from_start	0.092297295298339
1-0149	East-Asian	antisense_Rv0021c_182_from_start	0.625078349401526
1-0150	East-Asian	antisense_Rv0021c_182_from_start	0
1-0153	East-Asian	antisense_Rv0021c_182_from_start	0.399739632611969
1-0156	Euro-American	antisense_Rv0021c_182_from_start	2.79236503716806
2-0013	East-Asian	antisense_Rv0021c_182_from_start	0.343472546063683
2-0021	Euro-American	antisense_Rv0021c_182_from_start	2.79236503716806
2-0022	Euro-American	antisense_Rv0021c_182_from_start	2.79236503716806
2-0023	Euro-American	antisense_Rv0021c_182_from_start	2.79236503716806
2-0028	Euro-American	antisense_Rv0021c_182_from_start	2.79236503716806
2-0029	Euro-American	antisense_Rv0021c_182_from_start	2.51346663609139
2-0034	East-Asian	antisense_Rv0021c_182_from_start	0.473050217502126
2-0043-unknown	Euro-American	antisense_Rv0021c_182_from_start	2.41567017071416
2-0046	Euro-American	antisense_Rv0021c_182_from_start	2.70132828388661
2-0052	East-Asian	antisense_Rv0021c_182_from_start	0.374305554401604
2-0068	East-Asian	antisense_Rv0021c_182_from_start	0.177761839140533
2-0111	Euro-American	antisense_Rv0021c_182_from_start	2.79236503716806
3-0059	Euro-American	antisense_Rv0021c_182_from_start	2.79236503716806
3-0090	Indo-Oceanic	antisense_Rv0021c_182_from_start	0
3-0096	Indo-Oceanic	antisense_Rv0021c_182_from_start	0
3-0124	Indo-Oceanic	antisense_Rv0021c_182_from_start	0
4-0012	Euro-American	antisense_Rv0021c_182_from_start	2.79236503716806
4-0062	East-Asian	antisense_Rv0021c_182_from_start	0
4-0073	Euro-American	antisense_Rv0021c_182_from_start	2.79236503716806
4-0077	East-Asian	antisense_Rv0021c_182_from_start	0.375905062294139
4-0087	Euro-American	antisense_Rv0021c_182_from_start	2.79236503716806
4-0096	East-Asian	antisense_Rv0021c_182_from_start	0.357406539339639
N0091	M. africanum	antisense_Rv0021c_182_from_start	2.79236503716806
N0153	Indo-Oceanic	antisense_Rv0021c_182_from_start	2.79236503716806
N0157	Indo-Oceanic	antisense_Rv0021c_182_from_start	0.125192249109033
N1063	M. africanum	antisense_Rv0021c_182_from_start	2.79236503716806
N1176	M. africanum	antisense_Rv0021c_182_from_start	2.79236503716806
N1216	Euro-American	antisense_Rv0021c_182_from_start	2.79236503716806
SEA00042	Euro-American	antisense_Rv0021c_182_from_start	2.79236503716806
SEA06535	Euro-American	antisense_Rv0021c_182_from_start	2.79236503716806
SEA07020250	Euro-American	antisense_Rv0021c_182_from_start	1.20998034618886
SEA08151	Indo-Oceanic	antisense_Rv0021c_182_from_start	2.79236503716806
SEA09020048	Euro-American	antisense_Rv0021c_182_from_start	2.79236503716806
SEA09167	Euro-American	antisense_Rv0021c_182_from_start	2.79236503716806
SEA11020038	Euro-American	antisense_Rv0021c_182_from_start	2.79236503716806
SEA11020057	Euro-American	antisense_Rv0021c_182_from_start	2.79236503716806
SEA11020068	Euro-American	antisense_Rv0021c_182_from_start	2.79236503716806
SEA11020092	Euro-American	antisense_Rv0021c_182_from_start	2.79236503716806
SEA11278	Lineage 7	antisense_Rv0021c_182_from_start	2.79236503716806
SEA12126	Indo-Oceanic	antisense_Rv0021c_182_from_start	2.79236503716806
SEA12202	Indo-Oceanic	antisense_Rv0021c_182_from_start	2.79236503716806
SEA12334	Indo-Oceanic	antisense_Rv0021c_182_from_start	2.79236503716806
SEA13111	Indo-Oceanic	antisense_Rv0021c_182_from_start	2.79236503716806
SEA14117	East-Asian	antisense_Rv0021c_182_from_start	2.79236503716806
SEA14333	Indo-Oceanic	antisense_Rv0021c_182_from_start	2.79236503716806
SEA15228	Indo-Oceanic	antisense_Rv0021c_182_from_start	2.79236503716806
SEA15229	Indo-Oceanic	antisense_Rv0021c_182_from_start	2.79236503716806
SEA15230	Indo-Oceanic	antisense_Rv0021c_182_from_start	2.79236503716806
SEA17020028	East-Asian	antisense_Rv0021c_182_from_start	0
SEA17020030	Euro-American	antisense_Rv0021c_182_from_start	2.79236503716806
1-0006	East-Asian	antisense_Rv0023_217_to_stop	0.97341476655489
1-0009	East-Asian	antisense_Rv0023_217_to_stop	1.36346503117035
1-0013	East-Asian	antisense_Rv0023_217_to_stop	2.77521651924458
1-0017	East-Asian	antisense_Rv0023_217_to_stop	0.794644193700799
1-0021	East-African-Indian	antisense_Rv0023_217_to_stop	2.15231821501759
1-0028	East-Asian	antisense_Rv0023_217_to_stop	0.812149751053002
1-0030	Indo-Oceanic	antisense_Rv0023_217_to_stop	2.79236503716806
1-0031	East-Asian	antisense_Rv0023_217_to_stop	1.12830199954559
1-0036	Euro-American	antisense_Rv0023_217_to_stop	2.79236503716806
1-0039	East-Asian	antisense_Rv0023_217_to_stop	0.788603283255942
1-0044	Euro-American	antisense_Rv0023_217_to_stop	2.75401646421227
1-0045	East-Asian	antisense_Rv0023_217_to_stop	0.330332017446207
1-0047	East-African-Indian	antisense_Rv0023_217_to_stop	2.79236503716806
1-0054	East-Asian	antisense_Rv0023_217_to_stop	0.288812874073335
1-0056	East-Asian	antisense_Rv0023_217_to_stop	1.00386178303508
1-0061	Indo-Oceanic	antisense_Rv0023_217_to_stop	2.55940752588936
1-0064	East-Asian	antisense_Rv0023_217_to_stop	0.795832117507598
1-0066	East-Asian	antisense_Rv0023_217_to_stop	0.624492828659079
1-0069	East-Asian	antisense_Rv0023_217_to_stop	0.678238690108422
1-0071	East-Asian	antisense_Rv0023_217_to_stop	0.53528427640644
1-0084	East-Asian	antisense_Rv0023_217_to_stop	0.468021825735419
1-0102	East-Asian	antisense_Rv0023_217_to_stop	0
1-0107	East-African-Indian	antisense_Rv0023_217_to_stop	2.68771281700005
1-0110	East-Asian	antisense_Rv0023_217_to_stop	0.96824941929251
1-0112	East-Asian	antisense_Rv0023_217_to_stop	1.02527840472991
1-0116	East-Asian	antisense_Rv0023_217_to_stop	1.22833958424724
1-0123	East-Asian	antisense_Rv0023_217_to_stop	0.880243127084839
1-0137	East-Asian	antisense_Rv0023_217_to_stop	0.109171113862735
1-0149	East-Asian	antisense_Rv0023_217_to_stop	1.12740370114514
1-0150	East-Asian	antisense_Rv0023_217_to_stop	0.49031382320309
1-0153	East-Asian	antisense_Rv0023_217_to_stop	0
1-0156	Euro-American	antisense_Rv0023_217_to_stop	2.63766140834342
2-0013	East-Asian	antisense_Rv0023_217_to_stop	0.0529212546442761
2-0021	Euro-American	antisense_Rv0023_217_to_stop	2.79236503716806
2-0022	Euro-American	antisense_Rv0023_217_to_stop	2.79236503716806
2-0023	Euro-American	antisense_Rv0023_217_to_stop	2.79236503716806
2-0028	Euro-American	antisense_Rv0023_217_to_stop	2.79236503716806
2-0029	Euro-American	antisense_Rv0023_217_to_stop	2.79236503716806
2-0034	East-Asian	antisense_Rv0023_217_to_stop	0.474088501131603
2-0043-unknown	Euro-American	antisense_Rv0023_217_to_stop	2.44372267890442
2-0046	Euro-American	antisense_Rv0023_217_to_stop	2.62717900420957
2-0052	East-Asian	antisense_Rv0023_217_to_stop	1.44400930351339
2-0068	East-Asian	antisense_Rv0023_217_to_stop	0.160811770210596
2-0111	Euro-American	antisense_Rv0023_217_to_stop	2.19924515838625
3-0059	Euro-American	antisense_Rv0023_217_to_stop	2.51169074514691
3-0090	Indo-Oceanic	antisense_Rv0023_217_to_stop	0
3-0096	Indo-Oceanic	antisense_Rv0023_217_to_stop	0
3-0124	Indo-Oceanic	antisense_Rv0023_217_to_stop	0.155376777954731
4-0012	Euro-American	antisense_Rv0023_217_to_stop	2.79236503716806
4-0062	East-Asian	antisense_Rv0023_217_to_stop	0.109735456615666
4-0073	Euro-American	antisense_Rv0023_217_to_stop	2.75770034206311
4-0077	East-Asian	antisense_Rv0023_217_to_stop	1.04989499422787
4-0087	Euro-American	antisense_Rv0023_217_to_stop	2.79236503716806
4-0096	East-Asian	antisense_Rv0023_217_to_stop	0.866785688254328
N0054	East-African-Indian	antisense_Rv0023_217_to_stop	2.79236503716806
N0091	M. africanum	antisense_Rv0023_217_to_stop	2.79236503716806
N0153	Indo-Oceanic	antisense_Rv0023_217_to_stop	2.79236503716806
N0157	Indo-Oceanic	antisense_Rv0023_217_to_stop	0.00787919808719567
N1063	M. africanum	antisense_Rv0023_217_to_stop	2.79236503716806
N1176	M. africanum	antisense_Rv0023_217_to_stop	2.79236503716806
N1216	Euro-American	antisense_Rv0023_217_to_stop	2.79236503716806
SEA00042	Euro-American	antisense_Rv0023_217_to_stop	2.79236503716806
SEA06535	Euro-American	antisense_Rv0023_217_to_stop	2.68517386477382
SEA07010354	East-African-Indian	antisense_Rv0023_217_to_stop	2.78218800544264
SEA07020250	Euro-American	antisense_Rv0023_217_to_stop	1.57340320824411
SEA08151	Indo-Oceanic	antisense_Rv0023_217_to_stop	2.79236503716806
SEA09020048	Euro-American	antisense_Rv0023_217_to_stop	2.79236503716806
SEA09167	Euro-American	antisense_Rv0023_217_to_stop	2.57097512126283
SEA11020038	Euro-American	antisense_Rv0023_217_to_stop	2.61089874834422
SEA11020057	Euro-American	antisense_Rv0023_217_to_stop	2.79236503716806
SEA11020068	Euro-American	antisense_Rv0023_217_to_stop	2.7790305786239
SEA11020092	Euro-American	antisense_Rv0023_217_to_stop	2.79236503716806
SEA11278	Lineage 7	antisense_Rv0023_217_to_stop	2.7680513406083
SEA12126	Indo-Oceanic	antisense_Rv0023_217_to_stop	2.59433876497647
SEA12202	Indo-Oceanic	antisense_Rv0023_217_to_stop	2.79236503716806
SEA12334	Indo-Oceanic	antisense_Rv0023_217_to_stop	2.71673084352611
SEA13111	Indo-Oceanic	antisense_Rv0023_217_to_stop	2.79236503716806
SEA14117	East-Asian	antisense_Rv0023_217_to_stop	2.79236503716806
SEA14333	Indo-Oceanic	antisense_Rv0023_217_to_stop	2.79236503716806
SEA15228	Indo-Oceanic	antisense_Rv0023_217_to_stop	2.79236503716806
SEA15229	Indo-Oceanic	antisense_Rv0023_217_to_stop	2.79236503716806
SEA15230	Indo-Oceanic	antisense_Rv0023_217_to_stop	2.59092689317409
SEA17020023	Indo-Oceanic	antisense_Rv0023_217_to_stop	2.51344576638644
SEA17020024	Indo-Oceanic	antisense_Rv0023_217_to_stop	2.61439353611984
SEA17020028	East-Asian	antisense_Rv0023_217_to_stop	0.453242932822703
SEA17020030	Euro-American	antisense_Rv0023_217_to_stop	2.55250653412712
1-0006	East-Asian	sense_Rv0023_214_to_stop	0.963530651196708
1-0009	East-Asian	sense_Rv0023_214_to_stop	0.46355654947516
1-0013	East-Asian	sense_Rv0023_214_to_stop	2.7473631671324
1-0017	East-Asian	sense_Rv0023_214_to_stop	0.895024783844465
1-0021	East-African-Indian	sense_Rv0023_214_to_stop	2.79236503716806
1-0028	East-Asian	sense_Rv0023_214_to_stop	0.96999213526427
1-0030	Indo-Oceanic	sense_Rv0023_214_to_stop	2.79236503716806
1-0031	East-Asian	sense_Rv0023_214_to_stop	0.621589899614505
1-0036	Euro-American	sense_Rv0023_214_to_stop	2.73901203047552
1-0039	East-Asian	sense_Rv0023_214_to_stop	0
1-0044	Euro-American	sense_Rv0023_214_to_stop	2.79236503716806
1-0045	East-Asian	sense_Rv0023_214_to_stop	0.12424140843886
1-0047	East-African-Indian	sense_Rv0023_214_to_stop	2.59356749677448
1-0054	East-Asian	sense_Rv0023_214_to_stop	0.299356368314804
1-0056	East-Asian	sense_Rv0023_214_to_stop	0.796412270289511
1-0061	Indo-Oceanic	sense_Rv0023_214_to_stop	2.33641535603424
1-0064	East-Asian	sense_Rv0023_214_to_stop	0.0230267543986442
1-0066	East-Asian	sense_Rv0023_214_to_stop	0.434500149332767
1-0069	East-Asian	sense_Rv0023_214_to_stop	0.900904064816394
1-0071	East-Asian	sense_Rv0023_214_to_stop	0.405529096131817
1-0084	East-Asian	sense_Rv0023_214_to_stop	0.230429341739049
1-0102	East-Asian	sense_Rv0023_214_to_stop	0.0585347308004541
1-0107	East-African-Indian	sense_Rv0023_214_to_stop	2.54156276086557
1-0110	East-Asian	sense_Rv0023_214_to_stop	0
1-0112	East-Asian	sense_Rv0023_214_to_stop	0.75441633548147
1-0116	East-Asian	sense_Rv0023_214_to_stop	0.0947564298686524
1-0123	East-Asian	sense_Rv0023_214_to_stop	0.266921031149035
1-0137	East-Asian	sense_Rv0023_214_to_stop	0.729120914143459
1-0149	East-Asian	sense_Rv0023_214_to_stop	0.554986453743093
1-0150	East-Asian	sense_Rv0023_214_to_stop	0
1-0153	East-Asian	sense_Rv0023_214_to_stop	0
1-0156	Euro-American	sense_Rv0023_214_to_stop	2.79236503716806
2-0013	East-Asian	sense_Rv0023_214_to_stop	0.277364998722013
2-0021	Euro-American	sense_Rv0023_214_to_stop	2.79236503716806
2-0022	Euro-American	sense_Rv0023_214_to_stop	2.79236503716806
2-0023	Euro-American	sense_Rv0023_214_to_stop	2.79236503716806
2-0028	Euro-American	sense_Rv0023_214_to_stop	2.47405541197323
2-0029	Euro-American	sense_Rv0023_214_to_stop	2.64177987692027
2-0034	East-Asian	sense_Rv0023_214_to_stop	0.369725893330988
2-0043-unknown	Euro-American	sense_Rv0023_214_to_stop	2.32476858352825
2-0046	Euro-American	sense_Rv0023_214_to_stop	2.79236503716806
2-0052	East-Asian	sense_Rv0023_214_to_stop	0.875307126262807
2-0068	East-Asian	sense_Rv0023_214_to_stop	0
2-0111	Euro-American	sense_Rv0023_214_to_stop	2.5997727331172
3-0059	Euro-American	sense_Rv0023_214_to_stop	2.79236503716806
3-0090	Indo-Oceanic	sense_Rv0023_214_to_stop	0.00300312560338083
3-0096	Indo-Oceanic	sense_Rv0023_214_to_stop	0
3-0124	Indo-Oceanic	sense_Rv0023_214_to_stop	0
4-0012	Euro-American	sense_Rv0023_214_to_stop	2.71582287581267
4-0062	East-Asian	sense_Rv0023_214_to_stop	1.10288829121939
4-0073	Euro-American	sense_Rv0023_214_to_stop	2.71035748606316
4-0077	East-Asian	sense_Rv0023_214_to_stop	0.511055503514093
4-0087	Euro-American	sense_Rv0023_214_to_stop	2.29903445660736
4-0096	East-Asian	sense_Rv0023_214_to_stop	0.652945909746473
N0054	East-African-Indian	sense_Rv0023_214_to_stop	2.79236503716806
N0091	M. africanum	sense_Rv0023_214_to_stop	2.79236503716806
N0153	Indo-Oceanic	sense_Rv0023_214_to_stop	2.70435134032168
N0157	Indo-Oceanic	sense_Rv0023_214_to_stop	0
N1063	M. africanum	sense_Rv0023_214_to_stop	2.51708063545281
N1176	M. africanum	sense_Rv0023_214_to_stop	2.59322159011794
N1216	Euro-American	sense_Rv0023_214_to_stop	2.70123654121742
SEA00042	Euro-American	sense_Rv0023_214_to_stop	2.38791018341509
SEA06535	Euro-American	sense_Rv0023_214_to_stop	2.75169006536267
SEA07010354	East-African-Indian	sense_Rv0023_214_to_stop	2.79236503716806
SEA07020250	Euro-American	sense_Rv0023_214_to_stop	1.14988657800809
SEA08151	Indo-Oceanic	sense_Rv0023_214_to_stop	2.78440118472318
SEA09020048	Euro-American	sense_Rv0023_214_to_stop	2.34977635453673
SEA09167	Euro-American	sense_Rv0023_214_to_stop	2.57822548851738
SEA11020038	Euro-American	sense_Rv0023_214_to_stop	2.50711485834499
SEA11020057	Euro-American	sense_Rv0023_214_to_stop	2.78778857096657
SEA11020068	Euro-American	sense_Rv0023_214_to_stop	2.79236503716806
SEA11020092	Euro-American	sense_Rv0023_214_to_stop	2.65107346986376
SEA11278	Lineage 7	sense_Rv0023_214_to_stop	2.5257533929713
SEA12126	Indo-Oceanic	sense_Rv0023_214_to_stop	2.79236503716806
SEA12202	Indo-Oceanic	sense_Rv0023_214_to_stop	2.62568456007578
SEA12334	Indo-Oceanic	sense_Rv0023_214_to_stop	2.6902343220649
SEA13111	Indo-Oceanic	sense_Rv0023_214_to_stop	2.78258723530992
SEA14117	East-Asian	sense_Rv0023_214_to_stop	2.24244779403094
SEA14333	Indo-Oceanic	sense_Rv0023_214_to_stop	2.28887442169466
SEA15228	Indo-Oceanic	sense_Rv0023_214_to_stop	2.58417676018405
SEA15229	Indo-Oceanic	sense_Rv0023_214_to_stop	2.79236503716806
SEA15230	Indo-Oceanic	sense_Rv0023_214_to_stop	2.79236503716806
SEA17020023	Indo-Oceanic	sense_Rv0023_214_to_stop	2.58016612191406
SEA17020024	Indo-Oceanic	sense_Rv0023_214_to_stop	1.81067358418058
SEA17020028	East-Asian	sense_Rv0023_214_to_stop	0
SEA17020030	Euro-American	sense_Rv0023_214_to_stop	2.49778852104475
1-0006	East-Asian	antisense_bioF2_625_from_start	1.08351968181599
1-0009	East-Asian	antisense_bioF2_625_from_start	0.762630478887254
1-0013	East-Asian	antisense_bioF2_625_from_start	2.79236503716806
1-0017	East-Asian	antisense_bioF2_625_from_start	1.14949326566385
1-0021	East-African-Indian	antisense_bioF2_625_from_start	2.75944165272643
1-0028	East-Asian	antisense_bioF2_625_from_start	1.06905805408995
1-0030	Indo-Oceanic	antisense_bioF2_625_from_start	2.79236503716806
1-0031	East-Asian	antisense_bioF2_625_from_start	0.390887736415769
1-0036	Euro-American	antisense_bioF2_625_from_start	2.79236503716806
1-0039	East-Asian	antisense_bioF2_625_from_start	0.060845187695922
1-0044	Euro-American	antisense_bioF2_625_from_start	2.79236503716806
1-0045	East-Asian	antisense_bioF2_625_from_start	0.395582025112957
1-0047	East-African-Indian	antisense_bioF2_625_from_start	2.79236503716806
1-0054	East-Asian	antisense_bioF2_625_from_start	0.286459374300363
1-0056	East-Asian	antisense_bioF2_625_from_start	0.198488214113648
1-0061	Indo-Oceanic	antisense_bioF2_625_from_start	2.79236503716806
1-0064	East-Asian	antisense_bioF2_625_from_start	0
1-0066	East-Asian	antisense_bioF2_625_from_start	0.603805143442107
1-0069	East-Asian	antisense_bioF2_625_from_start	0.587547673135497
1-0071	East-Asian	antisense_bioF2_625_from_start	0.256409034884245
1-0084	East-Asian	antisense_bioF2_625_from_start	0.326307991681874
1-0102	East-Asian	antisense_bioF2_625_from_start	0.245333550807163
1-0107	East-African-Indian	antisense_bioF2_625_from_start	2.79236503716806
1-0110	East-Asian	antisense_bioF2_625_from_start	0
1-0112	East-Asian	antisense_bioF2_625_from_start	0.208321170279767
1-0116	East-Asian	antisense_bioF2_625_from_start	0.472646782012133
1-0123	East-Asian	antisense_bioF2_625_from_start	0.238428820636018
1-0137	East-Asian	antisense_bioF2_625_from_start	0.742701450955738
1-0149	East-Asian	antisense_bioF2_625_from_start	0.437947032552874
1-0150	East-Asian	antisense_bioF2_625_from_start	0
1-0153	East-Asian	antisense_bioF2_625_from_start	0.79844349805039
1-0156	Euro-American	antisense_bioF2_625_from_start	2.79236503716806
2-0013	East-Asian	antisense_bioF2_625_from_start	0
2-0021	Euro-American	antisense_bioF2_625_from_start	2.79236503716806
2-0022	Euro-American	antisense_bioF2_625_from_start	2.77105576483158
2-0023	Euro-American	antisense_bioF2_625_from_start	2.79236503716806
2-0028	Euro-American	antisense_bioF2_625_from_start	2.79236503716806
2-0029	Euro-American	antisense_bioF2_625_from_start	2.74098874221497
2-0034	East-Asian	antisense_bioF2_625_from_start	1.05141951233396
2-0043-unknown	Euro-American	antisense_bioF2_625_from_start	2.79236503716806
2-0052	East-Asian	antisense_bioF2_625_from_start	0.72191247732922
2-0068	East-Asian	antisense_bioF2_625_from_start	0
3-0059	Euro-American	antisense_bioF2_625_from_start	2.79236503716806
4-0012	Euro-American	antisense_bioF2_625_from_start	2.79236503716806
4-0062	East-Asian	antisense_bioF2_625_from_start	0.651242786947984
4-0073	Euro-American	antisense_bioF2_625_from_start	2.72934510468912
4-0077	East-Asian	antisense_bioF2_625_from_start	0.0562241563983348
4-0096	East-Asian	antisense_bioF2_625_from_start	0.850861740265815
N0054	East-African-Indian	antisense_bioF2_625_from_start	2.79236503716806
N0091	M. africanum	antisense_bioF2_625_from_start	2.79236503716806
N0153	Indo-Oceanic	antisense_bioF2_625_from_start	2.79236503716806
N1063	M. africanum	antisense_bioF2_625_from_start	2.79236503716806
N1216	Euro-American	antisense_bioF2_625_from_start	2.79236503716806
SEA07010354	East-African-Indian	antisense_bioF2_625_from_start	2.57645844615471
SEA08151	Indo-Oceanic	antisense_bioF2_625_from_start	2.79236503716806
SEA09020048	Euro-American	antisense_bioF2_625_from_start	2.79236503716806
SEA09167	Euro-American	antisense_bioF2_625_from_start	2.79236503716806
SEA11020038	Euro-American	antisense_bioF2_625_from_start	2.79236503716806
SEA11020057	Euro-American	antisense_bioF2_625_from_start	2.79236503716806
SEA11020068	Euro-American	antisense_bioF2_625_from_start	2.71118481584082
SEA11020092	Euro-American	antisense_bioF2_625_from_start	2.62523490668856
SEA11278	Lineage 7	antisense_bioF2_625_from_start	2.79236503716806
SEA12126	Indo-Oceanic	antisense_bioF2_625_from_start	2.79236503716806
SEA12202	Indo-Oceanic	antisense_bioF2_625_from_start	2.79236503716806
SEA12334	Indo-Oceanic	antisense_bioF2_625_from_start	2.79236503716806
SEA13111	Indo-Oceanic	antisense_bioF2_625_from_start	2.79236503716806
SEA14117	East-Asian	antisense_bioF2_625_from_start	2.79236503716806
SEA14333	Indo-Oceanic	antisense_bioF2_625_from_start	2.79236503716806
SEA15228	Indo-Oceanic	antisense_bioF2_625_from_start	2.79236503716806
SEA15229	Indo-Oceanic	antisense_bioF2_625_from_start	2.79236503716806
SEA15230	Indo-Oceanic	antisense_bioF2_625_from_start	2.79236503716806
SEA17020023	Indo-Oceanic	antisense_bioF2_625_from_start	2.79236503716806
SEA17020024	Indo-Oceanic	antisense_bioF2_625_from_start	2.79236503716806
SEA17020028	East-Asian	antisense_bioF2_625_from_start	0
SEA17020030	Euro-American	antisense_bioF2_625_from_start	2.79236503716806
1-0006	East-Asian	sense_bioF2_628_from_start	0.546202553329944
1-0009	East-Asian	sense_bioF2_628_from_start	1.18689801615257
1-0013	East-Asian	sense_bioF2_628_from_start	2.79236503716806
1-0017	East-Asian	sense_bioF2_628_from_start	1.09700136862682
1-0021	East-African-Indian	sense_bioF2_628_from_start	2.79236503716806
1-0028	East-Asian	sense_bioF2_628_from_start	1.18419791735405
1-0030	Indo-Oceanic	sense_bioF2_628_from_start	2.79236503716806
1-0031	East-Asian	sense_bioF2_628_from_start	0.308953407580965
1-0036	Euro-American	sense_bioF2_628_from_start	2.79236503716806
1-0039	East-Asian	sense_bioF2_628_from_start	0.581286182381593
1-0044	Euro-American	sense_bioF2_628_from_start	2.63983239820566
1-0045	East-Asian	sense_bioF2_628_from_start	0.358166225642933
1-0047	East-African-Indian	sense_bioF2_628_from_start	2.79236503716806
1-0054	East-Asian	sense_bioF2_628_from_start	0.531719078406181
1-0056	East-Asian	sense_bioF2_628_from_start	1.0878852366599
1-0061	Indo-Oceanic	sense_bioF2_628_from_start	2.66683660159791
1-0064	East-Asian	sense_bioF2_628_from_start	0.162138633990618
1-0066	East-Asian	sense_bioF2_628_from_start	0.870308163444166
1-0069	East-Asian	sense_bioF2_628_from_start	0.78412985869916
1-0071	East-Asian	sense_bioF2_628_from_start	0.900369953709931
1-0084	East-Asian	sense_bioF2_628_from_start	0.495419060780516
1-0102	East-Asian	sense_bioF2_628_from_start	0.8132126759818
1-0107	East-African-Indian	sense_bioF2_628_from_start	2.70853723260307
1-0110	East-Asian	sense_bioF2_628_from_start	0.578815676898329
1-0112	East-Asian	sense_bioF2_628_from_start	0.843955341979867
1-0116	East-Asian	sense_bioF2_628_from_start	0.832798260594198
1-0123	East-Asian	sense_bioF2_628_from_start	0.53209118132682
1-0137	East-Asian	sense_bioF2_628_from_start	1.01680709571408
1-0149	East-Asian	sense_bioF2_628_from_start	0.901273120526293
1-0150	East-Asian	sense_bioF2_628_from_start	0.198179003515157
1-0153	East-Asian	sense_bioF2_628_from_start	0.974961750692732
1-0156	Euro-American	sense_bioF2_628_from_start	2.79236503716806
2-0013	East-Asian	sense_bioF2_628_from_start	0.261286790708438
2-0021	Euro-American	sense_bioF2_628_from_start	2.79236503716806
2-0022	Euro-American	sense_bioF2_628_from_start	2.79236503716806
2-0023	Euro-American	sense_bioF2_628_from_start	2.77167032403839
2-0028	Euro-American	sense_bioF2_628_from_start	2.79236503716806
2-0029	Euro-American	sense_bioF2_628_from_start	2.55842499811238
2-0034	East-Asian	sense_bioF2_628_from_start	1.48957374862902
2-0043-unknown	Euro-American	sense_bioF2_628_from_start	2.60295859174902
2-0052	East-Asian	sense_bioF2_628_from_start	1.24585270629563
2-0068	East-Asian	sense_bioF2_628_from_start	0.514904840871109
3-0059	Euro-American	sense_bioF2_628_from_start	2.52600304543127
4-0012	Euro-American	sense_bioF2_628_from_start	2.79236503716806
4-0062	East-Asian	sense_bioF2_628_from_start	0.815210764654057
4-0073	Euro-American	sense_bioF2_628_from_start	2.40189521566121
4-0077	East-Asian	sense_bioF2_628_from_start	1.13673583223177
4-0096	East-Asian	sense_bioF2_628_from_start	1.06545579104186
N0054	East-African-Indian	sense_bioF2_628_from_start	2.69943019432108
N0091	M. africanum	sense_bioF2_628_from_start	2.79236503716806
N0153	Indo-Oceanic	sense_bioF2_628_from_start	2.79236503716806
N1063	M. africanum	sense_bioF2_628_from_start	2.79236503716806
N1216	Euro-American	sense_bioF2_628_from_start	2.79236503716806
SEA07010354	East-African-Indian	sense_bioF2_628_from_start	2.76617617434558
SEA08151	Indo-Oceanic	sense_bioF2_628_from_start	2.57349873070729
SEA09020048	Euro-American	sense_bioF2_628_from_start	2.79236503716806
SEA09167	Euro-American	sense_bioF2_628_from_start	2.79236503716806
SEA11020038	Euro-American	sense_bioF2_628_from_start	2.79236503716806
SEA11020057	Euro-American	sense_bioF2_628_from_start	2.37687216226322
SEA11020068	Euro-American	sense_bioF2_628_from_start	2.78846753019356
SEA11020092	Euro-American	sense_bioF2_628_from_start	2.74376398194103
SEA11278	Lineage 7	sense_bioF2_628_from_start	2.79236503716806
SEA12126	Indo-Oceanic	sense_bioF2_628_from_start	2.79236503716806
SEA12202	Indo-Oceanic	sense_bioF2_628_from_start	2.79236503716806
SEA12334	Indo-Oceanic	sense_bioF2_628_from_start	2.62528327846337
SEA13111	Indo-Oceanic	sense_bioF2_628_from_start	2.76903865155877
SEA14117	East-Asian	sense_bioF2_628_from_start	2.79236503716806
SEA14333	Indo-Oceanic	sense_bioF2_628_from_start	2.79236503716806
SEA15228	Indo-Oceanic	sense_bioF2_628_from_start	2.79236503716806
SEA15229	Indo-Oceanic	sense_bioF2_628_from_start	2.61249486003988
SEA15230	Indo-Oceanic	sense_bioF2_628_from_start	2.79236503716806
SEA17020023	Indo-Oceanic	sense_bioF2_628_from_start	2.79236503716806
SEA17020024	Indo-Oceanic	sense_bioF2_628_from_start	2.79236503716806
SEA17020028	East-Asian	sense_bioF2_628_from_start	0.744301982789332
SEA17020030	Euro-American	sense_bioF2_628_from_start	2.62516415705957
1-0006	East-Asian	antisense_fadD34_817_from_start	0.365154764854904
1-0009	East-Asian	antisense_fadD34_817_from_start	0.413803514278061
1-0013	East-Asian	antisense_fadD34_817_from_start	2.64252727422808
1-0017	East-Asian	antisense_fadD34_817_from_start	0.413848820894815
1-0021	East-African-Indian	antisense_fadD34_817_from_start	2.21276845915276
1-0028	East-Asian	antisense_fadD34_817_from_start	0.0514101882705299
1-0030	Indo-Oceanic	antisense_fadD34_817_from_start	2.53336286484977
1-0031	East-Asian	antisense_fadD34_817_from_start	0.487428712387206
1-0036	Euro-American	antisense_fadD34_817_from_start	2.51289800065967
1-0039	East-Asian	antisense_fadD34_817_from_start	0.201474248052105
1-0044	Euro-American	antisense_fadD34_817_from_start	2.41899945280633
1-0045	East-Asian	antisense_fadD34_817_from_start	0.413379568208553
1-0054	East-Asian	antisense_fadD34_817_from_start	0.0858850631696059
1-0056	East-Asian	antisense_fadD34_817_from_start	0
1-0061	Indo-Oceanic	antisense_fadD34_817_from_start	2.13629538011714
1-0064	East-Asian	antisense_fadD34_817_from_start	0.302440319088317
1-0066	East-Asian	antisense_fadD34_817_from_start	0.624492828659079
1-0069	East-Asian	antisense_fadD34_817_from_start	0.186684133881393
1-0071	East-Asian	antisense_fadD34_817_from_start	0.0871384653156577
1-0084	East-Asian	antisense_fadD34_817_from_start	0
1-0102	East-Asian	antisense_fadD34_817_from_start	0.392856221269544
1-0110	East-Asian	antisense_fadD34_817_from_start	0
1-0112	East-Asian	antisense_fadD34_817_from_start	0
1-0116	East-Asian	antisense_fadD34_817_from_start	0.380710665206313
1-0123	East-Asian	antisense_fadD34_817_from_start	0.15911774161452
1-0137	East-Asian	antisense_fadD34_817_from_start	0
1-0149	East-Asian	antisense_fadD34_817_from_start	0.310567726076647
1-0150	East-Asian	antisense_fadD34_817_from_start	0
1-0153	East-Asian	antisense_fadD34_817_from_start	0.228694091275741
1-0156	Euro-American	antisense_fadD34_817_from_start	2.24550177959525
2-0013	East-Asian	antisense_fadD34_817_from_start	0
2-0021	Euro-American	antisense_fadD34_817_from_start	2.56563984185086
2-0022	Euro-American	antisense_fadD34_817_from_start	2.4470338136325
2-0023	Euro-American	antisense_fadD34_817_from_start	2.5128229555448
2-0028	Euro-American	antisense_fadD34_817_from_start	2.48861917991247
2-0029	Euro-American	antisense_fadD34_817_from_start	2.79236503716806
2-0034	East-Asian	antisense_fadD34_817_from_start	0
2-0043-unknown	Euro-American	antisense_fadD34_817_from_start	2.43480508410067
2-0046	Euro-American	antisense_fadD34_817_from_start	2.14145473458602
2-0052	East-Asian	antisense_fadD34_817_from_start	0.423288967015328
2-0068	East-Asian	antisense_fadD34_817_from_start	0
2-0111	Euro-American	antisense_fadD34_817_from_start	2.66481446312696
3-0059	Euro-American	antisense_fadD34_817_from_start	2.51358920679622
3-0090	Indo-Oceanic	antisense_fadD34_817_from_start	0.21819793386101
3-0096	Indo-Oceanic	antisense_fadD34_817_from_start	0
3-0124	Indo-Oceanic	antisense_fadD34_817_from_start	0
4-0012	Euro-American	antisense_fadD34_817_from_start	2.27455590855062
4-0062	East-Asian	antisense_fadD34_817_from_start	0.216357876149461
4-0073	Euro-American	antisense_fadD34_817_from_start	2.48069299367671
4-0077	East-Asian	antisense_fadD34_817_from_start	0.130084391031272
4-0087	Euro-American	antisense_fadD34_817_from_start	2.79236503716806
4-0096	East-Asian	antisense_fadD34_817_from_start	0.315089025504762
N0054	East-African-Indian	antisense_fadD34_817_from_start	2.59941955943554
N0091	M. africanum	antisense_fadD34_817_from_start	2.33183873778419
N0153	Indo-Oceanic	antisense_fadD34_817_from_start	2.68582565658176
N0157	Indo-Oceanic	antisense_fadD34_817_from_start	0
N1063	M. africanum	antisense_fadD34_817_from_start	2.52146129177676
N1176	M. africanum	antisense_fadD34_817_from_start	2.68290807707783
N1216	Euro-American	antisense_fadD34_817_from_start	2.66213549635086
SEA00042	Euro-American	antisense_fadD34_817_from_start	1.96256358479727
SEA06535	Euro-American	antisense_fadD34_817_from_start	2.48658278978622
SEA07010354	East-African-Indian	antisense_fadD34_817_from_start	2.10942861712317
SEA07020250	Euro-American	antisense_fadD34_817_from_start	0.522279739878443
SEA08151	Indo-Oceanic	antisense_fadD34_817_from_start	2.60805595274366
SEA09020048	Euro-American	antisense_fadD34_817_from_start	2.17959916202419
SEA11020038	Euro-American	antisense_fadD34_817_from_start	2.75637684144332
SEA11020068	Euro-American	antisense_fadD34_817_from_start	1.89830612931683
SEA11020092	Euro-American	antisense_fadD34_817_from_start	2.78818530579193
SEA11278	Lineage 7	antisense_fadD34_817_from_start	2.23189099705835
SEA12126	Indo-Oceanic	antisense_fadD34_817_from_start	2.45804728052138
SEA12202	Indo-Oceanic	antisense_fadD34_817_from_start	2.63446920278799
SEA12334	Indo-Oceanic	antisense_fadD34_817_from_start	2.68532339501137
SEA13111	Indo-Oceanic	antisense_fadD34_817_from_start	2.49228288790888
SEA14117	East-Asian	antisense_fadD34_817_from_start	2.50935767310951
SEA14333	Indo-Oceanic	antisense_fadD34_817_from_start	2.35204669402675
SEA15228	Indo-Oceanic	antisense_fadD34_817_from_start	2.62507479136605
SEA15229	Indo-Oceanic	antisense_fadD34_817_from_start	2.57642863133789
SEA15230	Indo-Oceanic	antisense_fadD34_817_from_start	2.34914787025018
SEA17020023	Indo-Oceanic	antisense_fadD34_817_from_start	2.54768935054209
SEA17020024	Indo-Oceanic	antisense_fadD34_817_from_start	2.63947217258697
SEA17020028	East-Asian	antisense_fadD34_817_from_start	0
SEA17020030	Euro-American	antisense_fadD34_817_from_start	1.90511769250757
1-0006	East-Asian	sense_fadD34_820_from_start	0.121624286841494
1-0009	East-Asian	sense_fadD34_820_from_start	0.707383331166793
1-0013	East-Asian	sense_fadD34_820_from_start	2.30136722146077
1-0017	East-Asian	sense_fadD34_820_from_start	0.914600322181226
1-0021	East-African-Indian	sense_fadD34_820_from_start	1.98475893431454
1-0028	East-Asian	sense_fadD34_820_from_start	0.620003616584675
1-0030	Indo-Oceanic	sense_fadD34_820_from_start	2.33042925045041
1-0031	East-Asian	sense_fadD34_820_from_start	0
1-0036	Euro-American	sense_fadD34_820_from_start	2.21132979218452
1-0039	East-Asian	sense_fadD34_820_from_start	0.57828369422007
1-0044	Euro-American	sense_fadD34_820_from_start	2.58827154553951
1-0045	East-Asian	sense_fadD34_820_from_start	0.243454566766241
1-0054	East-Asian	sense_fadD34_820_from_start	0.492439090744369
1-0056	East-Asian	sense_fadD34_820_from_start	0.0980522628168958
1-0061	Indo-Oceanic	sense_fadD34_820_from_start	2.37838977659111
1-0064	East-Asian	sense_fadD34_820_from_start	0.17679894069675
1-0066	East-Asian	sense_fadD34_820_from_start	0.496737281460706
1-0069	East-Asian	sense_fadD34_820_from_start	0.20536869714632
1-0071	East-Asian	sense_fadD34_820_from_start	0.424296125527352
1-0084	East-Asian	sense_fadD34_820_from_start	0.356503632259363
1-0102	East-Asian	sense_fadD34_820_from_start	0.332138378344435
1-0110	East-Asian	sense_fadD34_820_from_start	0.010673340682906
1-0112	East-Asian	sense_fadD34_820_from_start	0.406904630888779
1-0116	East-Asian	sense_fadD34_820_from_start	0.335868048551689
1-0123	East-Asian	sense_fadD34_820_from_start	0.411982515175238
1-0137	East-Asian	sense_fadD34_820_from_start	0.607718862766418
1-0149	East-Asian	sense_fadD34_820_from_start	0.221562720017902
1-0150	East-Asian	sense_fadD34_820_from_start	0.436428603056389
1-0153	East-Asian	sense_fadD34_820_from_start	0.464356889959655
1-0156	Euro-American	sense_fadD34_820_from_start	1.7324425519857
2-0013	East-Asian	sense_fadD34_820_from_start	0.343472546063683
2-0021	Euro-American	sense_fadD34_820_from_start	2.32522777418405
2-0022	Euro-American	sense_fadD34_820_from_start	2.32569274308054
2-0023	Euro-American	sense_fadD34_820_from_start	2.45714850109979
2-0028	Euro-American	sense_fadD34_820_from_start	2.22979865592636
2-0029	Euro-American	sense_fadD34_820_from_start	2.28685860664193
2-0034	East-Asian	sense_fadD34_820_from_start	0.400634084767561
2-0043-unknown	Euro-American	sense_fadD34_820_from_start	2.38445852184063
2-0046	Euro-American	sense_fadD34_820_from_start	2.22930540531693
2-0052	East-Asian	sense_fadD34_820_from_start	0.353113672955773
2-0068	East-Asian	sense_fadD34_820_from_start	0.27305696154423
2-0111	Euro-American	sense_fadD34_820_from_start	1.89024391526494
3-0059	Euro-American	sense_fadD34_820_from_start	2.0288668867313
3-0090	Indo-Oceanic	sense_fadD34_820_from_start	0.372618348368714
3-0096	Indo-Oceanic	sense_fadD34_820_from_start	0.448210852482979
3-0124	Indo-Oceanic	sense_fadD34_820_from_start	0.105576031432775
4-0012	Euro-American	sense_fadD34_820_from_start	2.16756988187369
4-0062	East-Asian	sense_fadD34_820_from_start	0.0253432693252939
4-0073	Euro-American	sense_fadD34_820_from_start	2.17206915301439
4-0077	East-Asian	sense_fadD34_820_from_start	0.661624404511809
4-0087	Euro-American	sense_fadD34_820_from_start	1.96665881231504
4-0096	East-Asian	sense_fadD34_820_from_start	0.583336950510694
N0054	East-African-Indian	sense_fadD34_820_from_start	2.40575618036091
N0091	M. africanum	sense_fadD34_820_from_start	1.89084669733553
N0153	Indo-Oceanic	sense_fadD34_820_from_start	2.47479481783687
N0157	Indo-Oceanic	sense_fadD34_820_from_start	0.217977852569766
N1063	M. africanum	sense_fadD34_820_from_start	2.19112522023674
N1176	M. africanum	sense_fadD34_820_from_start	1.91984536394591
N1216	Euro-American	sense_fadD34_820_from_start	2.50418881693482
SEA00042	Euro-American	sense_fadD34_820_from_start	2.24872215195035
SEA06535	Euro-American	sense_fadD34_820_from_start	2.0587779944335
SEA07010354	East-African-Indian	sense_fadD34_820_from_start	2.54800500679233
SEA07020250	Euro-American	sense_fadD34_820_from_start	0.515048170647368
SEA08151	Indo-Oceanic	sense_fadD34_820_from_start	2.12475019383712
SEA09020048	Euro-American	sense_fadD34_820_from_start	2.24086458619288
SEA11020038	Euro-American	sense_fadD34_820_from_start	2.22033517360287
SEA11020068	Euro-American	sense_fadD34_820_from_start	2.42287835247768
SEA11020092	Euro-American	sense_fadD34_820_from_start	2.26478656591771
SEA11278	Lineage 7	sense_fadD34_820_from_start	1.97619160701754
SEA12126	Indo-Oceanic	sense_fadD34_820_from_start	2.35797021945273
SEA12202	Indo-Oceanic	sense_fadD34_820_from_start	2.24779198640928
SEA12334	Indo-Oceanic	sense_fadD34_820_from_start	2.43333735005774
SEA13111	Indo-Oceanic	sense_fadD34_820_from_start	2.22892926644354
SEA14117	East-Asian	sense_fadD34_820_from_start	2.56920842786536
SEA14333	Indo-Oceanic	sense_fadD34_820_from_start	2.25807054581773
SEA15228	Indo-Oceanic	sense_fadD34_820_from_start	2.06094832966786
SEA15229	Indo-Oceanic	sense_fadD34_820_from_start	2.62700399189082
SEA15230	Indo-Oceanic	sense_fadD34_820_from_start	2.0793956316591
SEA17020023	Indo-Oceanic	sense_fadD34_820_from_start	2.28326084392529
SEA17020024	Indo-Oceanic	sense_fadD34_820_from_start	2.06269552935146
SEA17020028	East-Asian	sense_fadD34_820_from_start	0
SEA17020030	Euro-American	sense_fadD34_820_from_start	2.01408064543812
1-0006	East-Asian	sense_mtc28_352_from_start	1.17991615767022
1-0009	East-Asian	sense_mtc28_352_from_start	1.53034231750078
1-0013	East-Asian	sense_mtc28_352_from_start	2.26972984968203
1-0017	East-Asian	sense_mtc28_352_from_start	1.37480946443793
1-0021	East-African-Indian	sense_mtc28_352_from_start	2.60807808012207
[truncated: 269,066 more rows]
