# Supplementary material for: Drivers and sites of diversity in the DNA adenine methylomes of 93 Mycobacterium tuberculosis complex clinical isolates
Source: eLife. 2020 Oct 27;9:e58542. doi: 10.7554/eLife.58542 (PMC7591249; doi:10.7554/eLife.58542)
Supplement: Figure 4—source data 2. [file elife-58542-fig4-data2.csv]

Isolate	Lineage	RefLoci	logIPD_adj
1-0006	East-Asian	77_up_of_gyrB	2.46111989983636
1-0009	East-Asian	77_up_of_gyrB	2.46111989983636
1-0013	East-Asian	77_up_of_gyrB	0.0075322392718039
1-0017	East-Asian	77_up_of_gyrB	2.46111989983636
1-0021	East-African-Indian	77_up_of_gyrB	0
1-0028	East-Asian	77_up_of_gyrB	2.37363419025377
1-0030	Indo-Oceanic	77_up_of_gyrB	2.46111989983636
1-0031	East-Asian	77_up_of_gyrB	2.46111989983636
1-0036	Euro-American	77_up_of_gyrB	2.46111989983636
1-0039	East-Asian	77_up_of_gyrB	2.46111989983636
1-0044	Euro-American	77_up_of_gyrB	0.0567890132192936
1-0045	East-Asian	77_up_of_gyrB	2.46111989983636
1-0047	East-African-Indian	77_up_of_gyrB	0.0756966527953195
1-0054	East-Asian	77_up_of_gyrB	2.46111989983636
1-0056	East-Asian	77_up_of_gyrB	2.46111989983636
1-0061	Indo-Oceanic	77_up_of_gyrB	2.46111989983636
1-0064	East-Asian	77_up_of_gyrB	2.46111989983636
1-0066	East-Asian	77_up_of_gyrB	2.46111989983636
1-0069	East-Asian	77_up_of_gyrB	2.46111989983636
1-0071	East-Asian	77_up_of_gyrB	2.46111989983636
1-0084	East-Asian	77_up_of_gyrB	2.46111989983636
1-0102	East-Asian	77_up_of_gyrB	2.46111989983636
1-0107	East-African-Indian	77_up_of_gyrB	0
1-0110	East-Asian	77_up_of_gyrB	0.221071402666995
1-0112	East-Asian	77_up_of_gyrB	2.46111989983636
1-0116	East-Asian	77_up_of_gyrB	2.08902542205302
1-0123	East-Asian	77_up_of_gyrB	2.46111989983636
1-0137	East-Asian	77_up_of_gyrB	2.46111989983636
1-0149	East-Asian	77_up_of_gyrB	2.31856051683018
1-0150	East-Asian	77_up_of_gyrB	2.46111989983636
1-0153	East-Asian	77_up_of_gyrB	2.46111989983636
1-0156	Euro-American	77_up_of_gyrB	0.49276644210097
2-0013	East-Asian	77_up_of_gyrB	2.46111989983636
2-0021	Euro-American	77_up_of_gyrB	2.46111989983636
2-0022	Euro-American	77_up_of_gyrB	2.46111989983636
2-0023	Euro-American	77_up_of_gyrB	2.46111989983636
2-0028	Euro-American	77_up_of_gyrB	2.46111989983636
2-0029	Euro-American	77_up_of_gyrB	2.46111989983636
2-0034	East-Asian	77_up_of_gyrB	2.46111989983636
2-0043-unknown	Euro-American	77_up_of_gyrB	2.46111989983636
2-0046	Euro-American	77_up_of_gyrB	2.46111989983636
2-0052	East-Asian	77_up_of_gyrB	2.46111989983636
2-0068	East-Asian	77_up_of_gyrB	2.46111989983636
2-0111	Euro-American	77_up_of_gyrB	2.45416970177334
3-0059	Euro-American	77_up_of_gyrB	0.360772792814237
3-0090	Indo-Oceanic	77_up_of_gyrB	2.46111989983636
3-0096	Indo-Oceanic	77_up_of_gyrB	2.3119757560475
3-0124	Indo-Oceanic	77_up_of_gyrB	2.46111989983636
4-0012	Euro-American	77_up_of_gyrB	2.46111989983636
4-0062	East-Asian	77_up_of_gyrB	2.46111989983636
4-0073	Euro-American	77_up_of_gyrB	0
4-0077	East-Asian	77_up_of_gyrB	2.46111989983636
4-0087	Euro-American	77_up_of_gyrB	2.46111989983636
4-0096	East-Asian	77_up_of_gyrB	2.46111989983636
N0054	East-African-Indian	77_up_of_gyrB	0
N0091	M. africanum	77_up_of_gyrB	2.46111989983636
N0153	Indo-Oceanic	77_up_of_gyrB	2.46111989983636
N0157	Indo-Oceanic	77_up_of_gyrB	2.46111989983636
N1063	M. africanum	77_up_of_gyrB	2.46111989983636
N1176	M. africanum	77_up_of_gyrB	2.46111989983636
N1216	Euro-American	77_up_of_gyrB	0.0942545951417075
SEA00042	Euro-American	77_up_of_gyrB	0.110652877757748
SEA06535	Euro-American	77_up_of_gyrB	2.46111989983636
SEA07010354	East-African-Indian	77_up_of_gyrB	0
SEA07020250	Euro-American	77_up_of_gyrB	0.0165124644240262
SEA08151	Indo-Oceanic	77_up_of_gyrB	2.46111989983636
SEA09020048	Euro-American	77_up_of_gyrB	0.465475241984743
SEA09167	Euro-American	77_up_of_gyrB	0.0473505033585211
SEA11020038	Euro-American	77_up_of_gyrB	0
SEA11020057	Euro-American	77_up_of_gyrB	0.627484360741655
SEA11020068	Euro-American	77_up_of_gyrB	2.46111989983636
SEA11020092	Euro-American	77_up_of_gyrB	0.240814693208165
SEA11278	Lineage 7	77_up_of_gyrB	2.46111989983636
SEA12126	Indo-Oceanic	77_up_of_gyrB	2.46111989983636
SEA12202	Indo-Oceanic	77_up_of_gyrB	2.46111989983636
SEA12334	Indo-Oceanic	77_up_of_gyrB	2.46111989983636
SEA13111	Indo-Oceanic	77_up_of_gyrB	2.46111989983636
SEA14117	East-Asian	77_up_of_gyrB	2.46111989983636
SEA14333	Indo-Oceanic	77_up_of_gyrB	2.46111989983636
SEA15228	Indo-Oceanic	77_up_of_gyrB	2.46111989983636
SEA15229	Indo-Oceanic	77_up_of_gyrB	2.46111989983636
SEA15230	Indo-Oceanic	77_up_of_gyrB	2.46111989983636
SEA17020028	East-Asian	77_up_of_gyrB	2.46111989983636
SEA17020030	Euro-American	77_up_of_gyrB	2.27717578481887
1-0006	East-Asian	70_up_of_gyrB	2.3677513569703
1-0009	East-Asian	70_up_of_gyrB	2.46111989983636
1-0013	East-Asian	70_up_of_gyrB	0.0513178282795024
1-0017	East-Asian	70_up_of_gyrB	2.46111989983636
1-0021	East-African-Indian	70_up_of_gyrB	0.160363328832138
1-0028	East-Asian	70_up_of_gyrB	2.46111989983636
1-0030	Indo-Oceanic	70_up_of_gyrB	2.42789362854794
1-0031	East-Asian	70_up_of_gyrB	2.46111989983636
1-0036	Euro-American	70_up_of_gyrB	2.34694922261767
1-0039	East-Asian	70_up_of_gyrB	2.46111989983636
1-0044	Euro-American	70_up_of_gyrB	0.272797362148756
1-0045	East-Asian	70_up_of_gyrB	2.45237001477491
1-0047	East-African-Indian	70_up_of_gyrB	0
1-0054	East-Asian	70_up_of_gyrB	2.28085437680411
1-0056	East-Asian	70_up_of_gyrB	2.46111989983636
1-0061	Indo-Oceanic	70_up_of_gyrB	2.19305118086307
1-0064	East-Asian	70_up_of_gyrB	2.46111989983636
1-0066	East-Asian	70_up_of_gyrB	2.36507285519374
1-0069	East-Asian	70_up_of_gyrB	2.05638279456233
1-0071	East-Asian	70_up_of_gyrB	2.46111989983636
1-0084	East-Asian	70_up_of_gyrB	2.46111989983636
1-0102	East-Asian	70_up_of_gyrB	2.46111989983636
1-0107	East-African-Indian	70_up_of_gyrB	0
1-0110	East-Asian	70_up_of_gyrB	0
1-0112	East-Asian	70_up_of_gyrB	2.46111989983636
1-0116	East-Asian	70_up_of_gyrB	1.77518156054934
1-0123	East-Asian	70_up_of_gyrB	2.46111989983636
1-0137	East-Asian	70_up_of_gyrB	2.46111989983636
1-0149	East-Asian	70_up_of_gyrB	2.46111989983636
1-0150	East-Asian	70_up_of_gyrB	2.46111989983636
1-0153	East-Asian	70_up_of_gyrB	2.17865340877615
1-0156	Euro-American	70_up_of_gyrB	0
2-0013	East-Asian	70_up_of_gyrB	2.46111989983636
2-0021	Euro-American	70_up_of_gyrB	2.46111989983636
2-0022	Euro-American	70_up_of_gyrB	2.46111989983636
2-0023	Euro-American	70_up_of_gyrB	2.46111989983636
2-0028	Euro-American	70_up_of_gyrB	2.46111989983636
2-0029	Euro-American	70_up_of_gyrB	2.46111989983636
2-0034	East-Asian	70_up_of_gyrB	2.46111989983636
2-0043-unknown	Euro-American	70_up_of_gyrB	2.46111989983636
2-0046	Euro-American	70_up_of_gyrB	2.36716512075023
2-0052	East-Asian	70_up_of_gyrB	2.46111989983636
2-0068	East-Asian	70_up_of_gyrB	2.46111989983636
2-0111	Euro-American	70_up_of_gyrB	2.46111989983636
3-0059	Euro-American	70_up_of_gyrB	0
3-0090	Indo-Oceanic	70_up_of_gyrB	2.46111989983636
3-0096	Indo-Oceanic	70_up_of_gyrB	2.28980163235825
3-0124	Indo-Oceanic	70_up_of_gyrB	2.46111989983636
4-0012	Euro-American	70_up_of_gyrB	2.43032883280624
4-0062	East-Asian	70_up_of_gyrB	2.46111989983636
4-0073	Euro-American	70_up_of_gyrB	0.0485434068209064
4-0077	East-Asian	70_up_of_gyrB	2.46111989983636
4-0087	Euro-American	70_up_of_gyrB	2.46111989983636
4-0096	East-Asian	70_up_of_gyrB	2.38752187024771
N0054	East-African-Indian	70_up_of_gyrB	0
N0091	M. africanum	70_up_of_gyrB	2.26224602729418
N0153	Indo-Oceanic	70_up_of_gyrB	2.46111989983636
N0157	Indo-Oceanic	70_up_of_gyrB	2.46111989983636
N1063	M. africanum	70_up_of_gyrB	2.43869892304059
N1176	M. africanum	70_up_of_gyrB	2.46111989983636
N1216	Euro-American	70_up_of_gyrB	0.0819762653632706
SEA00042	Euro-American	70_up_of_gyrB	0.144825366925537
SEA06535	Euro-American	70_up_of_gyrB	2.29121135819929
SEA07010354	East-African-Indian	70_up_of_gyrB	0.0993092973221052
SEA07020250	Euro-American	70_up_of_gyrB	0
SEA08151	Indo-Oceanic	70_up_of_gyrB	2.38574043617766
SEA09020048	Euro-American	70_up_of_gyrB	0
SEA09167	Euro-American	70_up_of_gyrB	0.0941447148374624
SEA11020038	Euro-American	70_up_of_gyrB	0.495587177062689
SEA11020057	Euro-American	70_up_of_gyrB	0.132079959103435
SEA11020068	Euro-American	70_up_of_gyrB	2.17073671753586
SEA11020092	Euro-American	70_up_of_gyrB	0.0651533222167083
SEA11278	Lineage 7	70_up_of_gyrB	2.46111989983636
SEA12126	Indo-Oceanic	70_up_of_gyrB	2.46111989983636
SEA12202	Indo-Oceanic	70_up_of_gyrB	2.46111989983636
SEA12334	Indo-Oceanic	70_up_of_gyrB	2.46111989983636
SEA13111	Indo-Oceanic	70_up_of_gyrB	2.46111989983636
SEA14117	East-Asian	70_up_of_gyrB	2.42710518737287
SEA14333	Indo-Oceanic	70_up_of_gyrB	2.4400021574707
SEA15228	Indo-Oceanic	70_up_of_gyrB	2.41555510221519
SEA15229	Indo-Oceanic	70_up_of_gyrB	2.46111989983636
SEA15230	Indo-Oceanic	70_up_of_gyrB	2.37554196508641
SEA17020028	East-Asian	70_up_of_gyrB	2.46111989983636
SEA17020030	Euro-American	70_up_of_gyrB	2.12790305815828
1-0006	East-Asian	9_up_of_gyrB	2.46111989983636
1-0009	East-Asian	9_up_of_gyrB	2.46111989983636
1-0013	East-Asian	9_up_of_gyrB	0
1-0017	East-Asian	9_up_of_gyrB	2.46111989983636
1-0021	East-African-Indian	9_up_of_gyrB	0.248318529466435
1-0028	East-Asian	9_up_of_gyrB	2.46111989983636
1-0030	Indo-Oceanic	9_up_of_gyrB	2.46111989983636
1-0031	East-Asian	9_up_of_gyrB	2.46111989983636
1-0036	Euro-American	9_up_of_gyrB	2.46111989983636
1-0039	East-Asian	9_up_of_gyrB	2.46111989983636
1-0044	Euro-American	9_up_of_gyrB	0
1-0045	East-Asian	9_up_of_gyrB	2.46111989983636
1-0047	East-African-Indian	9_up_of_gyrB	0.116299192991399
1-0054	East-Asian	9_up_of_gyrB	2.46111989983636
1-0056	East-Asian	9_up_of_gyrB	2.46111989983636
1-0061	Indo-Oceanic	9_up_of_gyrB	2.46111989983636
1-0064	East-Asian	9_up_of_gyrB	2.46111989983636
1-0066	East-Asian	9_up_of_gyrB	2.46111989983636
1-0069	East-Asian	9_up_of_gyrB	2.46111989983636
1-0071	East-Asian	9_up_of_gyrB	2.46111989983636
1-0084	East-Asian	9_up_of_gyrB	2.46111989983636
1-0102	East-Asian	9_up_of_gyrB	2.46111989983636
1-0107	East-African-Indian	9_up_of_gyrB	0.0301926664430504
1-0110	East-Asian	9_up_of_gyrB	0.110513027519297
1-0112	East-Asian	9_up_of_gyrB	2.46111989983636
1-0116	East-Asian	9_up_of_gyrB	2.46111989983636
1-0123	East-Asian	9_up_of_gyrB	2.46111989983636
1-0137	East-Asian	9_up_of_gyrB	2.46111989983636
1-0149	East-Asian	9_up_of_gyrB	2.46111989983636
1-0150	East-Asian	9_up_of_gyrB	2.46111989983636
1-0153	East-Asian	9_up_of_gyrB	2.46111989983636
1-0156	Euro-American	9_up_of_gyrB	0.633109518373443
2-0013	East-Asian	9_up_of_gyrB	2.46111989983636
2-0021	Euro-American	9_up_of_gyrB	2.46111989983636
2-0022	Euro-American	9_up_of_gyrB	2.46111989983636
2-0023	Euro-American	9_up_of_gyrB	2.46111989983636
2-0028	Euro-American	9_up_of_gyrB	2.46111989983636
2-0029	Euro-American	9_up_of_gyrB	2.46111989983636
2-0034	East-Asian	9_up_of_gyrB	2.46111989983636
2-0043-unknown	Euro-American	9_up_of_gyrB	2.46111989983636
2-0046	Euro-American	9_up_of_gyrB	2.46111989983636
2-0052	East-Asian	9_up_of_gyrB	2.46111989983636
2-0068	East-Asian	9_up_of_gyrB	2.46111989983636
2-0111	Euro-American	9_up_of_gyrB	2.46111989983636
3-0059	Euro-American	9_up_of_gyrB	0
3-0090	Indo-Oceanic	9_up_of_gyrB	2.46111989983636
3-0096	Indo-Oceanic	9_up_of_gyrB	2.46111989983636
3-0124	Indo-Oceanic	9_up_of_gyrB	2.46111989983636
4-0012	Euro-American	9_up_of_gyrB	2.46111989983636
4-0062	East-Asian	9_up_of_gyrB	2.46111989983636
4-0073	Euro-American	9_up_of_gyrB	0.153896406967135
4-0077	East-Asian	9_up_of_gyrB	2.46111989983636
4-0087	Euro-American	9_up_of_gyrB	2.46111989983636
4-0096	East-Asian	9_up_of_gyrB	2.46111989983636
N0054	East-African-Indian	9_up_of_gyrB	0.0054029560736108
N0091	M. africanum	9_up_of_gyrB	2.46111989983636
N0153	Indo-Oceanic	9_up_of_gyrB	2.46111989983636
N0157	Indo-Oceanic	9_up_of_gyrB	2.46111989983636
N1063	M. africanum	9_up_of_gyrB	2.46111989983636
N1176	M. africanum	9_up_of_gyrB	2.46111989983636
N1216	Euro-American	9_up_of_gyrB	0.0792334982997321
SEA00042	Euro-American	9_up_of_gyrB	0
SEA06535	Euro-American	9_up_of_gyrB	2.46111989983636
SEA07010354	East-African-Indian	9_up_of_gyrB	0
SEA07020250	Euro-American	9_up_of_gyrB	0
SEA08151	Indo-Oceanic	9_up_of_gyrB	2.46111989983636
SEA09020048	Euro-American	9_up_of_gyrB	0
SEA09167	Euro-American	9_up_of_gyrB	0.155603394010545
SEA11020038	Euro-American	9_up_of_gyrB	0
SEA11020057	Euro-American	9_up_of_gyrB	0
SEA11020068	Euro-American	9_up_of_gyrB	2.46111989983636
SEA11020092	Euro-American	9_up_of_gyrB	0.0521624836969475
SEA11278	Lineage 7	9_up_of_gyrB	2.46111989983636
SEA12126	Indo-Oceanic	9_up_of_gyrB	2.46111989983636
SEA12202	Indo-Oceanic	9_up_of_gyrB	2.46111989983636
SEA12334	Indo-Oceanic	9_up_of_gyrB	2.46111989983636
SEA13111	Indo-Oceanic	9_up_of_gyrB	2.46111989983636
SEA14117	East-Asian	9_up_of_gyrB	2.46111989983636
SEA14333	Indo-Oceanic	9_up_of_gyrB	2.46111989983636
SEA15228	Indo-Oceanic	9_up_of_gyrB	2.46111989983636
SEA15229	Indo-Oceanic	9_up_of_gyrB	2.46111989983636
SEA15230	Indo-Oceanic	9_up_of_gyrB	2.46111989983636
SEA17020028	East-Asian	9_up_of_gyrB	2.46111989983636
SEA17020030	Euro-American	9_up_of_gyrB	2.46111989983636
1-0006	East-Asian	2_up_of_gyrB	2.46111989983636
1-0009	East-Asian	2_up_of_gyrB	2.46111989983636
1-0013	East-Asian	2_up_of_gyrB	0
1-0017	East-Asian	2_up_of_gyrB	2.46111989983636
1-0021	East-African-Indian	2_up_of_gyrB	0
1-0028	East-Asian	2_up_of_gyrB	2.46111989983636
1-0030	Indo-Oceanic	2_up_of_gyrB	2.46111989983636
1-0031	East-Asian	2_up_of_gyrB	2.46111989983636
1-0036	Euro-American	2_up_of_gyrB	2.4563746669363
1-0039	East-Asian	2_up_of_gyrB	2.46111989983636
1-0044	Euro-American	2_up_of_gyrB	0
1-0045	East-Asian	2_up_of_gyrB	2.46111989983636
1-0047	East-African-Indian	2_up_of_gyrB	0
1-0054	East-Asian	2_up_of_gyrB	2.46111989983636
1-0056	East-Asian	2_up_of_gyrB	2.4504553160446
1-0061	Indo-Oceanic	2_up_of_gyrB	2.46111989983636
1-0064	East-Asian	2_up_of_gyrB	2.46111989983636
1-0066	East-Asian	2_up_of_gyrB	2.15801394403037
1-0069	East-Asian	2_up_of_gyrB	2.46111989983636
1-0071	East-Asian	2_up_of_gyrB	2.3808212419742
1-0084	East-Asian	2_up_of_gyrB	2.46111989983636
1-0102	East-Asian	2_up_of_gyrB	2.4079222124138
1-0107	East-African-Indian	2_up_of_gyrB	0.216826126829176
1-0110	East-Asian	2_up_of_gyrB	0
1-0112	East-Asian	2_up_of_gyrB	2.46111989983636
1-0116	East-Asian	2_up_of_gyrB	2.46111989983636
1-0123	East-Asian	2_up_of_gyrB	2.27905263871697
1-0137	East-Asian	2_up_of_gyrB	2.46111989983636
1-0149	East-Asian	2_up_of_gyrB	2.46111989983636
1-0150	East-Asian	2_up_of_gyrB	2.21530114895652
1-0153	East-Asian	2_up_of_gyrB	2.29553597911631
1-0156	Euro-American	2_up_of_gyrB	0
2-0013	East-Asian	2_up_of_gyrB	2.46111989983636
2-0021	Euro-American	2_up_of_gyrB	2.46111989983636
2-0022	Euro-American	2_up_of_gyrB	2.44306413137703
2-0023	Euro-American	2_up_of_gyrB	2.46111989983636
2-0028	Euro-American	2_up_of_gyrB	2.46111989983636
2-0029	Euro-American	2_up_of_gyrB	2.37149161649437
2-0034	East-Asian	2_up_of_gyrB	2.35852478861042
2-0043-unknown	Euro-American	2_up_of_gyrB	2.46111989983636
2-0046	Euro-American	2_up_of_gyrB	2.27494581101375
2-0052	East-Asian	2_up_of_gyrB	2.39791631420309
2-0068	East-Asian	2_up_of_gyrB	2.46111989983636
2-0111	Euro-American	2_up_of_gyrB	2.06204913988605
3-0059	Euro-American	2_up_of_gyrB	0
3-0090	Indo-Oceanic	2_up_of_gyrB	2.46111989983636
3-0096	Indo-Oceanic	2_up_of_gyrB	2.46111989983636
3-0124	Indo-Oceanic	2_up_of_gyrB	2.46111989983636
4-0012	Euro-American	2_up_of_gyrB	2.46111989983636
4-0062	East-Asian	2_up_of_gyrB	2.46111989983636
4-0073	Euro-American	2_up_of_gyrB	0
4-0077	East-Asian	2_up_of_gyrB	2.46111989983636
4-0087	Euro-American	2_up_of_gyrB	2.46111989983636
4-0096	East-Asian	2_up_of_gyrB	2.46111989983636
N0054	East-African-Indian	2_up_of_gyrB	0.0835564170722374
N0091	M. africanum	2_up_of_gyrB	2.46111989983636
N0153	Indo-Oceanic	2_up_of_gyrB	2.46111989983636
N0157	Indo-Oceanic	2_up_of_gyrB	2.46111989983636
N1063	M. africanum	2_up_of_gyrB	2.46111989983636
N1176	M. africanum	2_up_of_gyrB	2.46111989983636
N1216	Euro-American	2_up_of_gyrB	0
SEA00042	Euro-American	2_up_of_gyrB	0
SEA06535	Euro-American	2_up_of_gyrB	2.46111989983636
SEA07010354	East-African-Indian	2_up_of_gyrB	0
SEA07020250	Euro-American	2_up_of_gyrB	0
SEA08151	Indo-Oceanic	2_up_of_gyrB	2.36895527920215
SEA09020048	Euro-American	2_up_of_gyrB	0
SEA09167	Euro-American	2_up_of_gyrB	0
SEA11020038	Euro-American	2_up_of_gyrB	0
SEA11020057	Euro-American	2_up_of_gyrB	0.0740675743172786
SEA11020068	Euro-American	2_up_of_gyrB	2.43039940118961
SEA11020092	Euro-American	2_up_of_gyrB	0.0536117003340172
SEA11278	Lineage 7	2_up_of_gyrB	2.46111989983636
SEA12126	Indo-Oceanic	2_up_of_gyrB	2.46111989983636
SEA12202	Indo-Oceanic	2_up_of_gyrB	2.35165358536298
SEA12334	Indo-Oceanic	2_up_of_gyrB	2.46111989983636
SEA13111	Indo-Oceanic	2_up_of_gyrB	2.46111989983636
SEA14117	East-Asian	2_up_of_gyrB	2.46111989983636
SEA14333	Indo-Oceanic	2_up_of_gyrB	2.46111989983636
SEA15228	Indo-Oceanic	2_up_of_gyrB	2.46111989983636
SEA15229	Indo-Oceanic	2_up_of_gyrB	2.46111989983636
SEA15230	Indo-Oceanic	2_up_of_gyrB	2.46111989983636
SEA17020028	East-Asian	2_up_of_gyrB	2.15442175758978
SEA17020030	Euro-American	2_up_of_gyrB	2.45815880790969
1-0006	East-Asian	sense_gyrA_1031_to_stop	2.46111989983636
1-0009	East-Asian	sense_gyrA_1031_to_stop	2.38445758270396
1-0013	East-Asian	sense_gyrA_1031_to_stop	0
1-0017	East-Asian	sense_gyrA_1031_to_stop	2.37565719438548
1-0021	East-African-Indian	sense_gyrA_1031_to_stop	0.379962535276905
1-0028	East-Asian	sense_gyrA_1031_to_stop	2.46111989983636
1-0030	Indo-Oceanic	sense_gyrA_1031_to_stop	2.46111989983636
1-0031	East-Asian	sense_gyrA_1031_to_stop	2.45881759026968
1-0036	Euro-American	sense_gyrA_1031_to_stop	2.46111989983636
1-0039	East-Asian	sense_gyrA_1031_to_stop	1.88773478393942
1-0044	Euro-American	sense_gyrA_1031_to_stop	0
1-0045	East-Asian	sense_gyrA_1031_to_stop	2.36332587960985
1-0047	East-African-Indian	sense_gyrA_1031_to_stop	0.082779116900955
1-0054	East-Asian	sense_gyrA_1031_to_stop	2.3936689757367
1-0056	East-Asian	sense_gyrA_1031_to_stop	2.32679890681767
1-0061	Indo-Oceanic	sense_gyrA_1031_to_stop	2.46111989983636
1-0064	East-Asian	sense_gyrA_1031_to_stop	2.4255636889298
1-0066	East-Asian	sense_gyrA_1031_to_stop	2.46111989983636
1-0069	East-Asian	sense_gyrA_1031_to_stop	2.14753818394012
1-0071	East-Asian	sense_gyrA_1031_to_stop	2.39129185847504
1-0084	East-Asian	sense_gyrA_1031_to_stop	2.46111989983636
1-0102	East-Asian	sense_gyrA_1031_to_stop	2.46111989983636
1-0107	East-African-Indian	sense_gyrA_1031_to_stop	0.283010676233708
1-0110	East-Asian	sense_gyrA_1031_to_stop	0.838941939731017
1-0112	East-Asian	sense_gyrA_1031_to_stop	2.34028419866779
1-0116	East-Asian	sense_gyrA_1031_to_stop	2.46111989983636
1-0123	East-Asian	sense_gyrA_1031_to_stop	2.27331880234719
1-0137	East-Asian	sense_gyrA_1031_to_stop	2.32284994915925
1-0149	East-Asian	sense_gyrA_1031_to_stop	2.46111989983636
1-0150	East-Asian	sense_gyrA_1031_to_stop	2.46111989983636
1-0153	East-Asian	sense_gyrA_1031_to_stop	2.46111989983636
1-0156	Euro-American	sense_gyrA_1031_to_stop	0.338528344272612
2-0013	East-Asian	sense_gyrA_1031_to_stop	2.46111989983636
2-0021	Euro-American	sense_gyrA_1031_to_stop	2.46111989983636
2-0022	Euro-American	sense_gyrA_1031_to_stop	2.46111989983636
2-0023	Euro-American	sense_gyrA_1031_to_stop	2.46111989983636
2-0028	Euro-American	sense_gyrA_1031_to_stop	2.46111989983636
2-0029	Euro-American	sense_gyrA_1031_to_stop	2.46111989983636
2-0034	East-Asian	sense_gyrA_1031_to_stop	2.46111989983636
2-0043-unknown	Euro-American	sense_gyrA_1031_to_stop	2.46111989983636
2-0046	Euro-American	sense_gyrA_1031_to_stop	2.46111989983636
2-0052	East-Asian	sense_gyrA_1031_to_stop	2.46111989983636
2-0068	East-Asian	sense_gyrA_1031_to_stop	2.2047288867408
2-0111	Euro-American	sense_gyrA_1031_to_stop	2.46111989983636
3-0059	Euro-American	sense_gyrA_1031_to_stop	0.829923243092186
3-0090	Indo-Oceanic	sense_gyrA_1031_to_stop	2.46111989983636
3-0096	Indo-Oceanic	sense_gyrA_1031_to_stop	2.46111989983636
3-0124	Indo-Oceanic	sense_gyrA_1031_to_stop	2.07103373742751
4-0012	Euro-American	sense_gyrA_1031_to_stop	2.46111989983636
4-0062	East-Asian	sense_gyrA_1031_to_stop	2.46111989983636
4-0073	Euro-American	sense_gyrA_1031_to_stop	0
4-0077	East-Asian	sense_gyrA_1031_to_stop	2.46111989983636
4-0087	Euro-American	sense_gyrA_1031_to_stop	2.46041329434933
4-0096	East-Asian	sense_gyrA_1031_to_stop	2.46111989983636
N0054	East-African-Indian	sense_gyrA_1031_to_stop	0.241659710053705
N0091	M. africanum	sense_gyrA_1031_to_stop	0.800391746390031
N0153	Indo-Oceanic	sense_gyrA_1031_to_stop	2.46111989983636
N0157	Indo-Oceanic	sense_gyrA_1031_to_stop	2.46111989983636
N1063	M. africanum	sense_gyrA_1031_to_stop	2.46111989983636
N1176	M. africanum	sense_gyrA_1031_to_stop	2.41583250602217
N1216	Euro-American	sense_gyrA_1031_to_stop	0.131798964001843
SEA00042	Euro-American	sense_gyrA_1031_to_stop	0.116175162168791
SEA06535	Euro-American	sense_gyrA_1031_to_stop	2.46111989983636
SEA07010354	East-African-Indian	sense_gyrA_1031_to_stop	0.344728160238928
SEA07020250	Euro-American	sense_gyrA_1031_to_stop	0.149219435780765
SEA08151	Indo-Oceanic	sense_gyrA_1031_to_stop	2.46111989983636
SEA09020048	Euro-American	sense_gyrA_1031_to_stop	0
SEA09167	Euro-American	sense_gyrA_1031_to_stop	0
SEA11020038	Euro-American	sense_gyrA_1031_to_stop	0
SEA11020057	Euro-American	sense_gyrA_1031_to_stop	0
SEA11020068	Euro-American	sense_gyrA_1031_to_stop	2.46111989983636
SEA11020092	Euro-American	sense_gyrA_1031_to_stop	0.235716825568486
SEA11278	Lineage 7	sense_gyrA_1031_to_stop	2.46111989983636
SEA12126	Indo-Oceanic	sense_gyrA_1031_to_stop	2.46111989983636
SEA12202	Indo-Oceanic	sense_gyrA_1031_to_stop	2.46111989983636
SEA12334	Indo-Oceanic	sense_gyrA_1031_to_stop	2.12683717117868
SEA13111	Indo-Oceanic	sense_gyrA_1031_to_stop	2.36878172483859
SEA14117	East-Asian	sense_gyrA_1031_to_stop	2.46111989983636
SEA14333	Indo-Oceanic	sense_gyrA_1031_to_stop	2.32139648118656
SEA15228	Indo-Oceanic	sense_gyrA_1031_to_stop	2.46111989983636
SEA15229	Indo-Oceanic	sense_gyrA_1031_to_stop	2.46111989983636
SEA15230	Indo-Oceanic	sense_gyrA_1031_to_stop	2.46111989983636
SEA17020028	East-Asian	sense_gyrA_1031_to_stop	2.2019075556753
SEA17020030	Euro-American	sense_gyrA_1031_to_stop	2.40301029629265
1-0006	East-Asian	antisense_gyrA_1024_to_stop	2.46111989983636
1-0009	East-Asian	antisense_gyrA_1024_to_stop	2.45770947095941
1-0013	East-Asian	antisense_gyrA_1024_to_stop	0.0802415615803026
1-0017	East-Asian	antisense_gyrA_1024_to_stop	2.3869129178796
1-0021	East-African-Indian	antisense_gyrA_1024_to_stop	0
1-0028	East-Asian	antisense_gyrA_1024_to_stop	2.46111989983636
1-0030	Indo-Oceanic	antisense_gyrA_1024_to_stop	2.25109689041104
1-0031	East-Asian	antisense_gyrA_1024_to_stop	2.46111989983636
1-0036	Euro-American	antisense_gyrA_1024_to_stop	2.46111989983636
1-0039	East-Asian	antisense_gyrA_1024_to_stop	1.73837920861384
1-0044	Euro-American	antisense_gyrA_1024_to_stop	0.176795542271402
1-0045	East-Asian	antisense_gyrA_1024_to_stop	2.46111989983636
1-0047	East-African-Indian	antisense_gyrA_1024_to_stop	0.308599087287959
1-0054	East-Asian	antisense_gyrA_1024_to_stop	2.46111989983636
1-0056	East-Asian	antisense_gyrA_1024_to_stop	2.46111989983636
1-0061	Indo-Oceanic	antisense_gyrA_1024_to_stop	2.27702168602232
1-0064	East-Asian	antisense_gyrA_1024_to_stop	2.46111989983636
1-0066	East-Asian	antisense_gyrA_1024_to_stop	2.11723680612612
1-0069	East-Asian	antisense_gyrA_1024_to_stop	2.09590122450894
1-0071	East-Asian	antisense_gyrA_1024_to_stop	2.29260758361564
1-0084	East-Asian	antisense_gyrA_1024_to_stop	2.46111989983636
1-0102	East-Asian	antisense_gyrA_1024_to_stop	2.46111989983636
1-0107	East-African-Indian	antisense_gyrA_1024_to_stop	0
1-0110	East-Asian	antisense_gyrA_1024_to_stop	0
1-0112	East-Asian	antisense_gyrA_1024_to_stop	2.46111989983636
1-0116	East-Asian	antisense_gyrA_1024_to_stop	2.46111989983636
1-0123	East-Asian	antisense_gyrA_1024_to_stop	2.46111989983636
1-0137	East-Asian	antisense_gyrA_1024_to_stop	2.40086832305743
1-0149	East-Asian	antisense_gyrA_1024_to_stop	2.40944561092774
1-0150	East-Asian	antisense_gyrA_1024_to_stop	2.46111989983636
1-0153	East-Asian	antisense_gyrA_1024_to_stop	2.46111989983636
1-0156	Euro-American	antisense_gyrA_1024_to_stop	0
2-0013	East-Asian	antisense_gyrA_1024_to_stop	2.46111989983636
2-0021	Euro-American	antisense_gyrA_1024_to_stop	2.46111989983636
2-0022	Euro-American	antisense_gyrA_1024_to_stop	2.46111989983636
2-0023	Euro-American	antisense_gyrA_1024_to_stop	2.46111989983636
2-0028	Euro-American	antisense_gyrA_1024_to_stop	2.46111989983636
2-0029	Euro-American	antisense_gyrA_1024_to_stop	2.46111989983636
2-0034	East-Asian	antisense_gyrA_1024_to_stop	2.46111989983636
2-0043-unknown	Euro-American	antisense_gyrA_1024_to_stop	2.45617051316722
2-0046	Euro-American	antisense_gyrA_1024_to_stop	2.46111989983636
2-0052	East-Asian	antisense_gyrA_1024_to_stop	2.46111989983636
2-0068	East-Asian	antisense_gyrA_1024_to_stop	2.46111989983636
2-0111	Euro-American	antisense_gyrA_1024_to_stop	2.1513014459169
3-0059	Euro-American	antisense_gyrA_1024_to_stop	0.242782431462117
3-0090	Indo-Oceanic	antisense_gyrA_1024_to_stop	2.46111989983636
3-0096	Indo-Oceanic	antisense_gyrA_1024_to_stop	2.46111989983636
3-0124	Indo-Oceanic	antisense_gyrA_1024_to_stop	2.46111989983636
4-0012	Euro-American	antisense_gyrA_1024_to_stop	2.46111989983636
4-0062	East-Asian	antisense_gyrA_1024_to_stop	2.46111989983636
4-0073	Euro-American	antisense_gyrA_1024_to_stop	0
4-0077	East-Asian	antisense_gyrA_1024_to_stop	2.46111989983636
4-0087	Euro-American	antisense_gyrA_1024_to_stop	2.46111989983636
4-0096	East-Asian	antisense_gyrA_1024_to_stop	2.46111989983636
N0054	East-African-Indian	antisense_gyrA_1024_to_stop	0
N0091	M. africanum	antisense_gyrA_1024_to_stop	0.895772515786325
N0153	Indo-Oceanic	antisense_gyrA_1024_to_stop	2.46111989983636
N0157	Indo-Oceanic	antisense_gyrA_1024_to_stop	2.46111989983636
N1063	M. africanum	antisense_gyrA_1024_to_stop	2.46111989983636
N1176	M. africanum	antisense_gyrA_1024_to_stop	2.46111989983636
N1216	Euro-American	antisense_gyrA_1024_to_stop	0
SEA00042	Euro-American	antisense_gyrA_1024_to_stop	0
SEA06535	Euro-American	antisense_gyrA_1024_to_stop	2.46111989983636
SEA07010354	East-African-Indian	antisense_gyrA_1024_to_stop	0
SEA07020250	Euro-American	antisense_gyrA_1024_to_stop	0.341363954518155
SEA08151	Indo-Oceanic	antisense_gyrA_1024_to_stop	2.46111989983636
SEA09020048	Euro-American	antisense_gyrA_1024_to_stop	0.247685852048895
SEA09167	Euro-American	antisense_gyrA_1024_to_stop	0
SEA11020038	Euro-American	antisense_gyrA_1024_to_stop	0
SEA11020057	Euro-American	antisense_gyrA_1024_to_stop	0
SEA11020068	Euro-American	antisense_gyrA_1024_to_stop	2.46111989983636
SEA11020092	Euro-American	antisense_gyrA_1024_to_stop	0
SEA11278	Lineage 7	antisense_gyrA_1024_to_stop	2.46111989983636
SEA12126	Indo-Oceanic	antisense_gyrA_1024_to_stop	2.30054620458378
SEA12202	Indo-Oceanic	antisense_gyrA_1024_to_stop	2.46111989983636
SEA12334	Indo-Oceanic	antisense_gyrA_1024_to_stop	2.46111989983636
SEA13111	Indo-Oceanic	antisense_gyrA_1024_to_stop	2.01824825780188
SEA14117	East-Asian	antisense_gyrA_1024_to_stop	2.46111989983636
SEA14333	Indo-Oceanic	antisense_gyrA_1024_to_stop	2.46111989983636
SEA15228	Indo-Oceanic	antisense_gyrA_1024_to_stop	2.46111989983636
SEA15229	Indo-Oceanic	antisense_gyrA_1024_to_stop	2.46111989983636
SEA15230	Indo-Oceanic	antisense_gyrA_1024_to_stop	2.46111989983636
SEA17020028	East-Asian	antisense_gyrA_1024_to_stop	2.40077551292857
SEA17020030	Euro-American	antisense_gyrA_1024_to_stop	2.46111989983636
1-0006	East-Asian	sense_gyrA_314_to_stop	2.46111989983636
1-0009	East-Asian	sense_gyrA_314_to_stop	2.26007367611354
1-0013	East-Asian	sense_gyrA_314_to_stop	0.0401449163602452
1-0017	East-Asian	sense_gyrA_314_to_stop	2.46111989983636
1-0021	East-African-Indian	sense_gyrA_314_to_stop	0
1-0028	East-Asian	sense_gyrA_314_to_stop	2.46111989983636
1-0030	Indo-Oceanic	sense_gyrA_314_to_stop	2.08410305126976
1-0031	East-Asian	sense_gyrA_314_to_stop	2.41398025304771
1-0036	Euro-American	sense_gyrA_314_to_stop	2.46111989983636
1-0039	East-Asian	sense_gyrA_314_to_stop	2.42516698046431
1-0044	Euro-American	sense_gyrA_314_to_stop	0
1-0045	East-Asian	sense_gyrA_314_to_stop	2.46111989983636
1-0047	East-African-Indian	sense_gyrA_314_to_stop	0
1-0054	East-Asian	sense_gyrA_314_to_stop	2.46111989983636
1-0056	East-Asian	sense_gyrA_314_to_stop	2.10176229302038
1-0061	Indo-Oceanic	sense_gyrA_314_to_stop	2.1551230829074
1-0064	East-Asian	sense_gyrA_314_to_stop	2.33874588471554
1-0066	East-Asian	sense_gyrA_314_to_stop	2.46111989983636
1-0069	East-Asian	sense_gyrA_314_to_stop	1.96025619930979
1-0071	East-Asian	sense_gyrA_314_to_stop	2.26424269236228
1-0084	East-Asian	sense_gyrA_314_to_stop	2.18369963339538
1-0102	East-Asian	sense_gyrA_314_to_stop	2.46111989983636
1-0107	East-African-Indian	sense_gyrA_314_to_stop	0.0646810428283411
1-0110	East-Asian	sense_gyrA_314_to_stop	0
1-0112	East-Asian	sense_gyrA_314_to_stop	2.46111989983636
1-0116	East-Asian	sense_gyrA_314_to_stop	2.43008011812506
1-0123	East-Asian	sense_gyrA_314_to_stop	2.45257617708408
1-0137	East-Asian	sense_gyrA_314_to_stop	2.28095885932224
1-0149	East-Asian	sense_gyrA_314_to_stop	2.46111989983636
1-0150	East-Asian	sense_gyrA_314_to_stop	2.33762285365
1-0153	East-Asian	sense_gyrA_314_to_stop	2.04860518520044
1-0156	Euro-American	sense_gyrA_314_to_stop	0.110117334593533
2-0013	East-Asian	sense_gyrA_314_to_stop	2.20258741710279
2-0021	Euro-American	sense_gyrA_314_to_stop	2.46111989983636
2-0022	Euro-American	sense_gyrA_314_to_stop	2.27299715335232
2-0023	Euro-American	sense_gyrA_314_to_stop	2.46111989983636
2-0028	Euro-American	sense_gyrA_314_to_stop	2.46111989983636
2-0029	Euro-American	sense_gyrA_314_to_stop	2.46111989983636
2-0034	East-Asian	sense_gyrA_314_to_stop	2.46111989983636
2-0043-unknown	Euro-American	sense_gyrA_314_to_stop	1.95973976867137
2-0046	Euro-American	sense_gyrA_314_to_stop	2.46111989983636
2-0052	East-Asian	sense_gyrA_314_to_stop	2.46111989983636
2-0068	East-Asian	sense_gyrA_314_to_stop	2.46111989983636
2-0111	Euro-American	sense_gyrA_314_to_stop	2.46111989983636
3-0059	Euro-American	sense_gyrA_314_to_stop	0
3-0090	Indo-Oceanic	sense_gyrA_314_to_stop	2.46111989983636
3-0096	Indo-Oceanic	sense_gyrA_314_to_stop	2.21088963093318
3-0124	Indo-Oceanic	sense_gyrA_314_to_stop	2.1604668515903
4-0012	Euro-American	sense_gyrA_314_to_stop	2.46111989983636
4-0062	East-Asian	sense_gyrA_314_to_stop	2.46111989983636
4-0073	Euro-American	sense_gyrA_314_to_stop	0.134805645816113
4-0077	East-Asian	sense_gyrA_314_to_stop	2.3876639458892
4-0087	Euro-American	sense_gyrA_314_to_stop	2.1156035474441
4-0096	East-Asian	sense_gyrA_314_to_stop	2.46111989983636
N0054	East-African-Indian	sense_gyrA_314_to_stop	0
N0091	M. africanum	sense_gyrA_314_to_stop	2.38076697761554
N0153	Indo-Oceanic	sense_gyrA_314_to_stop	2.46111989983636
N0157	Indo-Oceanic	sense_gyrA_314_to_stop	2.46111989983636
N1063	M. africanum	sense_gyrA_314_to_stop	2.46111989983636
N1176	M. africanum	sense_gyrA_314_to_stop	2.42820881868166
N1216	Euro-American	sense_gyrA_314_to_stop	0.141034354740747
SEA00042	Euro-American	sense_gyrA_314_to_stop	0
SEA06535	Euro-American	sense_gyrA_314_to_stop	2.46111989983636
SEA07010354	East-African-Indian	sense_gyrA_314_to_stop	0
SEA07020250	Euro-American	sense_gyrA_314_to_stop	0.108615582008293
SEA08151	Indo-Oceanic	sense_gyrA_314_to_stop	2.46111989983636
SEA09020048	Euro-American	sense_gyrA_314_to_stop	0
SEA09167	Euro-American	sense_gyrA_314_to_stop	0.263759625995746
SEA11020038	Euro-American	sense_gyrA_314_to_stop	0
SEA11020057	Euro-American	sense_gyrA_314_to_stop	0
SEA11020068	Euro-American	sense_gyrA_314_to_stop	2.29335125246681
SEA11020092	Euro-American	sense_gyrA_314_to_stop	0
SEA11278	Lineage 7	sense_gyrA_314_to_stop	2.32451344865184
SEA12126	Indo-Oceanic	sense_gyrA_314_to_stop	2.2844265392205
SEA12202	Indo-Oceanic	sense_gyrA_314_to_stop	2.11905042003959
SEA12334	Indo-Oceanic	sense_gyrA_314_to_stop	2.11061019946405
SEA13111	Indo-Oceanic	sense_gyrA_314_to_stop	2.30419033832888
SEA14117	East-Asian	sense_gyrA_314_to_stop	2.25008677746603
SEA14333	Indo-Oceanic	sense_gyrA_314_to_stop	2.34741803141302
SEA15228	Indo-Oceanic	sense_gyrA_314_to_stop	2.44069309441817
SEA15229	Indo-Oceanic	sense_gyrA_314_to_stop	2.42022539056459
SEA15230	Indo-Oceanic	sense_gyrA_314_to_stop	2.46111989983636
SEA17020028	East-Asian	sense_gyrA_314_to_stop	2.33825507372164
SEA17020030	Euro-American	sense_gyrA_314_to_stop	2.30782143817222
1-0006	East-Asian	antisense_gyrA_307_to_stop	2.46111989983636
1-0009	East-Asian	antisense_gyrA_307_to_stop	2.46111989983636
1-0013	East-Asian	antisense_gyrA_307_to_stop	0.0788773108489597
1-0017	East-Asian	antisense_gyrA_307_to_stop	2.46111989983636
1-0021	East-African-Indian	antisense_gyrA_307_to_stop	0.158967397382263
1-0028	East-Asian	antisense_gyrA_307_to_stop	2.46111989983636
1-0030	Indo-Oceanic	antisense_gyrA_307_to_stop	2.46111989983636
1-0031	East-Asian	antisense_gyrA_307_to_stop	2.46111989983636
1-0036	Euro-American	antisense_gyrA_307_to_stop	2.46111989983636
1-0039	East-Asian	antisense_gyrA_307_to_stop	2.46111989983636
1-0044	Euro-American	antisense_gyrA_307_to_stop	0
1-0045	East-Asian	antisense_gyrA_307_to_stop	2.46111989983636
1-0047	East-African-Indian	antisense_gyrA_307_to_stop	0.471795716116506
1-0054	East-Asian	antisense_gyrA_307_to_stop	2.46111989983636
1-0056	East-Asian	antisense_gyrA_307_to_stop	2.46111989983636
1-0061	Indo-Oceanic	antisense_gyrA_307_to_stop	2.46111989983636
1-0064	East-Asian	antisense_gyrA_307_to_stop	2.46111989983636
1-0066	East-Asian	antisense_gyrA_307_to_stop	2.27603591838734
1-0069	East-Asian	antisense_gyrA_307_to_stop	2.46111989983636
1-0071	East-Asian	antisense_gyrA_307_to_stop	2.46111989983636
1-0084	East-Asian	antisense_gyrA_307_to_stop	2.46111989983636
1-0102	East-Asian	antisense_gyrA_307_to_stop	2.46111989983636
1-0107	East-African-Indian	antisense_gyrA_307_to_stop	0.120390475414629
1-0110	East-Asian	antisense_gyrA_307_to_stop	0
1-0112	East-Asian	antisense_gyrA_307_to_stop	2.46111989983636
1-0116	East-Asian	antisense_gyrA_307_to_stop	2.46111989983636
1-0123	East-Asian	antisense_gyrA_307_to_stop	2.46111989983636
1-0137	East-Asian	antisense_gyrA_307_to_stop	2.46111989983636
1-0149	East-Asian	antisense_gyrA_307_to_stop	2.46111989983636
1-0150	East-Asian	antisense_gyrA_307_to_stop	2.46111989983636
1-0153	East-Asian	antisense_gyrA_307_to_stop	2.44032716654069
1-0156	Euro-American	antisense_gyrA_307_to_stop	0
2-0013	East-Asian	antisense_gyrA_307_to_stop	2.46111989983636
2-0021	Euro-American	antisense_gyrA_307_to_stop	2.46111989983636
2-0022	Euro-American	antisense_gyrA_307_to_stop	2.46111989983636
2-0023	Euro-American	antisense_gyrA_307_to_stop	2.46111989983636
2-0028	Euro-American	antisense_gyrA_307_to_stop	2.46111989983636
2-0029	Euro-American	antisense_gyrA_307_to_stop	2.46111989983636
2-0034	East-Asian	antisense_gyrA_307_to_stop	2.46111989983636
2-0043-unknown	Euro-American	antisense_gyrA_307_to_stop	2.46111989983636
2-0046	Euro-American	antisense_gyrA_307_to_stop	2.46111989983636
2-0052	East-Asian	antisense_gyrA_307_to_stop	2.46111989983636
2-0068	East-Asian	antisense_gyrA_307_to_stop	2.46111989983636
2-0111	Euro-American	antisense_gyrA_307_to_stop	2.46111989983636
3-0059	Euro-American	antisense_gyrA_307_to_stop	0.125669319728235
3-0090	Indo-Oceanic	antisense_gyrA_307_to_stop	2.46111989983636
3-0096	Indo-Oceanic	antisense_gyrA_307_to_stop	2.46111989983636
3-0124	Indo-Oceanic	antisense_gyrA_307_to_stop	2.46111989983636
4-0012	Euro-American	antisense_gyrA_307_to_stop	2.46111989983636
4-0062	East-Asian	antisense_gyrA_307_to_stop	2.46111989983636
4-0073	Euro-American	antisense_gyrA_307_to_stop	0.0265171004909074
4-0077	East-Asian	antisense_gyrA_307_to_stop	2.46111989983636
4-0087	Euro-American	antisense_gyrA_307_to_stop	2.46111989983636
4-0096	East-Asian	antisense_gyrA_307_to_stop	2.46111989983636
N0054	East-African-Indian	antisense_gyrA_307_to_stop	0.0753824856265372
N0091	M. africanum	antisense_gyrA_307_to_stop	2.46111989983636
N0153	Indo-Oceanic	antisense_gyrA_307_to_stop	2.46111989983636
N0157	Indo-Oceanic	antisense_gyrA_307_to_stop	2.46111989983636
N1063	M. africanum	antisense_gyrA_307_to_stop	2.46111989983636
N1176	M. africanum	antisense_gyrA_307_to_stop	2.46111989983636
N1216	Euro-American	antisense_gyrA_307_to_stop	0.0232538262405683
SEA00042	Euro-American	antisense_gyrA_307_to_stop	0.590932873033629
SEA06535	Euro-American	antisense_gyrA_307_to_stop	2.46111989983636
SEA07010354	East-African-Indian	antisense_gyrA_307_to_stop	0.178343516501864
SEA07020250	Euro-American	antisense_gyrA_307_to_stop	0.273192451876575
SEA08151	Indo-Oceanic	antisense_gyrA_307_to_stop	2.46111989983636
SEA09020048	Euro-American	antisense_gyrA_307_to_stop	0.119678239672824
SEA09167	Euro-American	antisense_gyrA_307_to_stop	0.0487910377177361
SEA11020038	Euro-American	antisense_gyrA_307_to_stop	0.0905634664118644
SEA11020057	Euro-American	antisense_gyrA_307_to_stop	0.146553081350986
SEA11020068	Euro-American	antisense_gyrA_307_to_stop	2.46111989983636
SEA11020092	Euro-American	antisense_gyrA_307_to_stop	0.121515764835821
SEA11278	Lineage 7	antisense_gyrA_307_to_stop	2.46111989983636
SEA12126	Indo-Oceanic	antisense_gyrA_307_to_stop	2.46111989983636
SEA12202	Indo-Oceanic	antisense_gyrA_307_to_stop	2.46111989983636
SEA12334	Indo-Oceanic	antisense_gyrA_307_to_stop	2.46111989983636
SEA13111	Indo-Oceanic	antisense_gyrA_307_to_stop	2.46111989983636
SEA14117	East-Asian	antisense_gyrA_307_to_stop	2.46111989983636
SEA14333	Indo-Oceanic	antisense_gyrA_307_to_stop	2.46111989983636
SEA15228	Indo-Oceanic	antisense_gyrA_307_to_stop	2.46111989983636
SEA15229	Indo-Oceanic	antisense_gyrA_307_to_stop	2.46111989983636
SEA15230	Indo-Oceanic	antisense_gyrA_307_to_stop	2.46111989983636
SEA17020028	East-Asian	antisense_gyrA_307_to_stop	2.46111989983636
SEA17020030	Euro-American	antisense_gyrA_307_to_stop	2.46111989983636
1-0006	East-Asian	19_up_of_Rv0029	2.46111989983636
1-0009	East-Asian	19_up_of_Rv0029	2.40051201792567
1-0013	East-Asian	19_up_of_Rv0029	0.360670293547517
1-0017	East-Asian	19_up_of_Rv0029	2.46111989983636
1-0021	East-African-Indian	19_up_of_Rv0029	0
1-0028	East-Asian	19_up_of_Rv0029	2.46111989983636
1-0030	Indo-Oceanic	19_up_of_Rv0029	2.46111989983636
1-0031	East-Asian	19_up_of_Rv0029	2.46111989983636
1-0036	Euro-American	19_up_of_Rv0029	2.46111989983636
1-0039	East-Asian	19_up_of_Rv0029	2.2937500243482
1-0044	Euro-American	19_up_of_Rv0029	0.106273850964994
1-0045	East-Asian	19_up_of_Rv0029	2.46111989983636
1-0047	East-African-Indian	19_up_of_Rv0029	0.0728539030264942
1-0054	East-Asian	19_up_of_Rv0029	2.46111989983636
1-0056	East-Asian	19_up_of_Rv0029	2.46111989983636
1-0061	Indo-Oceanic	19_up_of_Rv0029	2.46111989983636
1-0064	East-Asian	19_up_of_Rv0029	2.46111989983636
1-0066	East-Asian	19_up_of_Rv0029	2.46111989983636
1-0069	East-Asian	19_up_of_Rv0029	2.46111989983636
1-0071	East-Asian	19_up_of_Rv0029	2.40227878334895
1-0084	East-Asian	19_up_of_Rv0029	2.46111989983636
1-0102	East-Asian	19_up_of_Rv0029	2.46111989983636
1-0107	East-African-Indian	19_up_of_Rv0029	0.409151706366792
1-0110	East-Asian	19_up_of_Rv0029	0.0332983998917582
1-0112	East-Asian	19_up_of_Rv0029	2.29586179533069
1-0116	East-Asian	19_up_of_Rv0029	2.46111989983636
1-0123	East-Asian	19_up_of_Rv0029	2.46111989983636
1-0137	East-Asian	19_up_of_Rv0029	2.46111989983636
1-0149	East-Asian	19_up_of_Rv0029	2.46111989983636
1-0150	East-Asian	19_up_of_Rv0029	2.46111989983636
1-0153	East-Asian	19_up_of_Rv0029	2.46111989983636
1-0156	Euro-American	19_up_of_Rv0029	0
2-0013	East-Asian	19_up_of_Rv0029	2.46111989983636
2-0021	Euro-American	19_up_of_Rv0029	2.45043583625655
2-0022	Euro-American	19_up_of_Rv0029	2.46111989983636
2-0023	Euro-American	19_up_of_Rv0029	2.46111989983636
2-0028	Euro-American	19_up_of_Rv0029	2.46111989983636
2-0029	Euro-American	19_up_of_Rv0029	2.42536585760276
2-0034	East-Asian	19_up_of_Rv0029	2.4098873953784
2-0043-unknown	Euro-American	19_up_of_Rv0029	2.46111989983636
2-0046	Euro-American	19_up_of_Rv0029	2.46111989983636
2-0052	East-Asian	19_up_of_Rv0029	2.46111989983636
2-0068	East-Asian	19_up_of_Rv0029	2.46111989983636
2-0111	Euro-American	19_up_of_Rv0029	2.33295383302833
3-0059	Euro-American	19_up_of_Rv0029	0.208367890414942
3-0090	Indo-Oceanic	19_up_of_Rv0029	2.46111989983636
3-0096	Indo-Oceanic	19_up_of_Rv0029	2.46111989983636
3-0124	Indo-Oceanic	19_up_of_Rv0029	2.46111989983636
4-0062	East-Asian	19_up_of_Rv0029	2.46111989983636
4-0073	Euro-American	19_up_of_Rv0029	0.186046930570841
4-0077	East-Asian	19_up_of_Rv0029	2.46111989983636
4-0087	Euro-American	19_up_of_Rv0029	2.46111989983636
4-0096	East-Asian	19_up_of_Rv0029	2.46111989983636
N0054	East-African-Indian	19_up_of_Rv0029	0
N0091	M. africanum	19_up_of_Rv0029	1.72020985148105
N0153	Indo-Oceanic	19_up_of_Rv0029	2.46111989983636
N0157	Indo-Oceanic	19_up_of_Rv0029	2.34128063376151
N1063	M. africanum	19_up_of_Rv0029	2.46111989983636
N1176	M. africanum	19_up_of_Rv0029	2.46111989983636
N1216	Euro-American	19_up_of_Rv0029	0
SEA00042	Euro-American	19_up_of_Rv0029	0
SEA06535	Euro-American	19_up_of_Rv0029	2.46111989983636
SEA07010354	East-African-Indian	19_up_of_Rv0029	0.16502213800403
SEA07020250	Euro-American	19_up_of_Rv0029	0.103114354976923
SEA08151	Indo-Oceanic	19_up_of_Rv0029	2.46111989983636
SEA09020048	Euro-American	19_up_of_Rv0029	0
SEA09167	Euro-American	19_up_of_Rv0029	0.117671198484706
SEA11020038	Euro-American	19_up_of_Rv0029	0.00994500620357973
SEA11020057	Euro-American	19_up_of_Rv0029	0.146553081350986
SEA11020068	Euro-American	19_up_of_Rv0029	2.38024209435424
SEA11020092	Euro-American	19_up_of_Rv0029	0
SEA11278	Lineage 7	19_up_of_Rv0029	2.33354397713123
SEA12126	Indo-Oceanic	19_up_of_Rv0029	2.46111989983636
SEA12202	Indo-Oceanic	19_up_of_Rv0029	2.42437216165389
SEA12334	Indo-Oceanic	19_up_of_Rv0029	2.46111989983636
SEA13111	Indo-Oceanic	19_up_of_Rv0029	2.46111989983636
SEA14117	East-Asian	19_up_of_Rv0029	2.46111989983636
SEA14333	Indo-Oceanic	19_up_of_Rv0029	2.46111989983636
SEA15228	Indo-Oceanic	19_up_of_Rv0029	2.40047978175309
SEA15229	Indo-Oceanic	19_up_of_Rv0029	2.46111989983636
SEA15230	Indo-Oceanic	19_up_of_Rv0029	2.46111989983636
SEA17020023	Indo-Oceanic	19_up_of_Rv0029	2.46111989983636
SEA17020024	Indo-Oceanic	19_up_of_Rv0029	2.27415192979383
SEA17020028	East-Asian	19_up_of_Rv0029	2.46111989983636
1-0006	East-Asian	12_up_of_Rv0029	2.43229521229498
1-0009	East-Asian	12_up_of_Rv0029	2.20196633854359
1-0013	East-Asian	12_up_of_Rv0029	0
1-0017	East-Asian	12_up_of_Rv0029	2.46111989983636
1-0021	East-African-Indian	12_up_of_Rv0029	0.0917866948951149
1-0028	East-Asian	12_up_of_Rv0029	2.33343172711556
1-0030	Indo-Oceanic	12_up_of_Rv0029	2.35527957391494
1-0031	East-Asian	12_up_of_Rv0029	2.46111989983636
1-0036	Euro-American	12_up_of_Rv0029	2.46111989983636
1-0039	East-Asian	12_up_of_Rv0029	2.10671609873504
1-0044	Euro-American	12_up_of_Rv0029	0.269077476011642
1-0045	East-Asian	12_up_of_Rv0029	2.33646680361831
1-0047	East-African-Indian	12_up_of_Rv0029	0.0585555199739257
1-0054	East-Asian	12_up_of_Rv0029	2.13543737238642
1-0056	East-Asian	12_up_of_Rv0029	2.21975068453387
1-0061	Indo-Oceanic	12_up_of_Rv0029	2.46111989983636
1-0064	East-Asian	12_up_of_Rv0029	1.78847472472232
1-0066	East-Asian	12_up_of_Rv0029	2.33011467360473
1-0069	East-Asian	12_up_of_Rv0029	2.12948255907216
1-0071	East-Asian	12_up_of_Rv0029	1.97346961676637
1-0084	East-Asian	12_up_of_Rv0029	2.38520168073544
1-0102	East-Asian	12_up_of_Rv0029	2.41429173728952
1-0107	East-African-Indian	12_up_of_Rv0029	0
1-0110	East-Asian	12_up_of_Rv0029	0
1-0112	East-Asian	12_up_of_Rv0029	2.07652554832035
1-0116	East-Asian	12_up_of_Rv0029	2.46111989983636
1-0123	East-Asian	12_up_of_Rv0029	2.46111989983636
1-0137	East-Asian	12_up_of_Rv0029	2.25339458975162
1-0149	East-Asian	12_up_of_Rv0029	1.94958215540793
1-0150	East-Asian	12_up_of_Rv0029	2.46111989983636
1-0153	East-Asian	12_up_of_Rv0029	2.46111989983636
1-0156	Euro-American	12_up_of_Rv0029	0
2-0013	East-Asian	12_up_of_Rv0029	2.03775385794317
2-0021	Euro-American	12_up_of_Rv0029	1.92658359091677
2-0022	Euro-American	12_up_of_Rv0029	2.0528924023305
2-0023	Euro-American	12_up_of_Rv0029	2.36142945769547
2-0028	Euro-American	12_up_of_Rv0029	2.46111989983636
2-0029	Euro-American	12_up_of_Rv0029	2.2957862034529
2-0034	East-Asian	12_up_of_Rv0029	1.84338927118539
2-0043-unknown	Euro-American	12_up_of_Rv0029	2.37749457409086
2-0046	Euro-American	12_up_of_Rv0029	2.46111989983636
2-0052	East-Asian	12_up_of_Rv0029	2.37789950768908
2-0068	East-Asian	12_up_of_Rv0029	2.46111989983636
2-0111	Euro-American	12_up_of_Rv0029	2.05866297185142
3-0059	Euro-American	12_up_of_Rv0029	0
3-0090	Indo-Oceanic	12_up_of_Rv0029	2.35708988826512
3-0096	Indo-Oceanic	12_up_of_Rv0029	2.46111989983636
3-0124	Indo-Oceanic	12_up_of_Rv0029	2.33148293694546
4-0062	East-Asian	12_up_of_Rv0029	2.46111989983636
4-0073	Euro-American	12_up_of_Rv0029	0
4-0077	East-Asian	12_up_of_Rv0029	2.46111989983636
4-0087	Euro-American	12_up_of_Rv0029	2.26478039670564
4-0096	East-Asian	12_up_of_Rv0029	2.46111989983636
N0054	East-African-Indian	12_up_of_Rv0029	0.367494926078338
N0091	M. africanum	12_up_of_Rv0029	1.85160297259756
N0153	Indo-Oceanic	12_up_of_Rv0029	2.46111989983636
N0157	Indo-Oceanic	12_up_of_Rv0029	2.46111989983636
N1063	M. africanum	12_up_of_Rv0029	2.46111989983636
N1176	M. africanum	12_up_of_Rv0029	2.46111989983636
N1216	Euro-American	12_up_of_Rv0029	0
SEA00042	Euro-American	12_up_of_Rv0029	0.116175162168791
SEA06535	Euro-American	12_up_of_Rv0029	2.14921326452666
SEA07010354	East-African-Indian	12_up_of_Rv0029	0.316088112195027
SEA07020250	Euro-American	12_up_of_Rv0029	0.111358349071831
SEA08151	Indo-Oceanic	12_up_of_Rv0029	2.30663095489646
SEA09020048	Euro-American	12_up_of_Rv0029	0
SEA09167	Euro-American	12_up_of_Rv0029	0
SEA11020038	Euro-American	12_up_of_Rv0029	0
SEA11020057	Euro-American	12_up_of_Rv0029	0.223038926184357
SEA11020068	Euro-American	12_up_of_Rv0029	2.46111989983636
SEA11020092	Euro-American	12_up_of_Rv0029	0
SEA11278	Lineage 7	12_up_of_Rv0029	2.32597381423953
SEA12126	Indo-Oceanic	12_up_of_Rv0029	2.46111989983636
SEA12202	Indo-Oceanic	12_up_of_Rv0029	2.42272837677319
SEA12334	Indo-Oceanic	12_up_of_Rv0029	2.07725744517415
SEA13111	Indo-Oceanic	12_up_of_Rv0029	2.46111989983636
SEA14117	East-Asian	12_up_of_Rv0029	2.19669351804355
SEA14333	Indo-Oceanic	12_up_of_Rv0029	2.46111989983636
SEA15228	Indo-Oceanic	12_up_of_Rv0029	2.46111989983636
SEA15229	Indo-Oceanic	12_up_of_Rv0029	2.46111989983636
SEA15230	Indo-Oceanic	12_up_of_Rv0029	2.04267495359541
SEA17020023	Indo-Oceanic	12_up_of_Rv0029	2.4498944106827
SEA17020024	Indo-Oceanic	12_up_of_Rv0029	2.26353825576898
SEA17020028	East-Asian	12_up_of_Rv0029	2.46111989983636
1-0006	East-Asian	sense_Rv0064_165_from_start	2.46111989983636
1-0009	East-Asian	sense_Rv0064_165_from_start	2.46111989983636
1-0013	East-Asian	sense_Rv0064_165_from_start	0
1-0017	East-Asian	sense_Rv0064_165_from_start	2.46111989983636
1-0021	East-African-Indian	sense_Rv0064_165_from_start	0.0487179730032289
1-0028	East-Asian	sense_Rv0064_165_from_start	2.46111989983636
1-0030	Indo-Oceanic	sense_Rv0064_165_from_start	2.46111989983636
1-0031	East-Asian	sense_Rv0064_165_from_start	2.46111989983636
1-0036	Euro-American	sense_Rv0064_165_from_start	2.46111989983636
1-0039	East-Asian	sense_Rv0064_165_from_start	2.46111989983636
1-0044	Euro-American	sense_Rv0064_165_from_start	0.270318504080332
1-0045	East-Asian	sense_Rv0064_165_from_start	2.46111989983636
1-0047	East-African-Indian	sense_Rv0064_165_from_start	0
1-0054	East-Asian	sense_Rv0064_165_from_start	2.46111989983636
1-0056	East-Asian	sense_Rv0064_165_from_start	2.46111989983636
1-0061	Indo-Oceanic	sense_Rv0064_165_from_start	2.46111989983636
1-0064	East-Asian	sense_Rv0064_165_from_start	2.46111989983636
1-0066	East-Asian	sense_Rv0064_165_from_start	2.46111989983636
1-0069	East-Asian	sense_Rv0064_165_from_start	2.46111989983636
1-0071	East-Asian	sense_Rv0064_165_from_start	2.46111989983636
1-0084	East-Asian	sense_Rv0064_165_from_start	2.46111989983636
1-0102	East-Asian	sense_Rv0064_165_from_start	2.46111989983636
1-0107	East-African-Indian	sense_Rv0064_165_from_start	0
1-0110	East-Asian	sense_Rv0064_165_from_start	0.547721907796761
1-0112	East-Asian	sense_Rv0064_165_from_start	2.46111989983636
1-0116	East-Asian	sense_Rv0064_165_from_start	2.31637961896033
1-0123	East-Asian	sense_Rv0064_165_from_start	2.46111989983636
1-0137	East-Asian	sense_Rv0064_165_from_start	2.46111989983636
1-0149	East-Asian	sense_Rv0064_165_from_start	2.46111989983636
1-0150	East-Asian	sense_Rv0064_165_from_start	2.46111989983636
1-0153	East-Asian	sense_Rv0064_165_from_start	2.46111989983636
1-0156	Euro-American	sense_Rv0064_165_from_start	0
2-0013	East-Asian	sense_Rv0064_165_from_start	2.46111989983636
2-0021	Euro-American	sense_Rv0064_165_from_start	2.46111989983636
2-0022	Euro-American	sense_Rv0064_165_from_start	2.3901444411433
2-0023	Euro-American	sense_Rv0064_165_from_start	2.13433746310026
2-0028	Euro-American	sense_Rv0064_165_from_start	2.46111989983636
2-0029	Euro-American	sense_Rv0064_165_from_start	2.46111989983636
2-0034	East-Asian	sense_Rv0064_165_from_start	2.46111989983636
2-0043-unknown	Euro-American	sense_Rv0064_165_from_start	2.46111989983636
2-0046	Euro-American	sense_Rv0064_165_from_start	2.46111989983636
2-0052	East-Asian	sense_Rv0064_165_from_start	2.46111989983636
2-0068	East-Asian	sense_Rv0064_165_from_start	2.46111989983636
2-0111	Euro-American	sense_Rv0064_165_from_start	2.46111989983636
3-0059	Euro-American	sense_Rv0064_165_from_start	0.316717612736301
3-0090	Indo-Oceanic	sense_Rv0064_165_from_start	2.46111989983636
3-0096	Indo-Oceanic	sense_Rv0064_165_from_start	2.46111989983636
3-0124	Indo-Oceanic	sense_Rv0064_165_from_start	2.46111989983636
4-0012	Euro-American	sense_Rv0064_165_from_start	2.37329344451786
4-0062	East-Asian	sense_Rv0064_165_from_start	2.46111989983636
4-0073	Euro-American	sense_Rv0064_165_from_start	0.168721054410559
4-0077	East-Asian	sense_Rv0064_165_from_start	2.46111989983636
4-0087	Euro-American	sense_Rv0064_165_from_start	2.46111989983636
4-0096	East-Asian	sense_Rv0064_165_from_start	2.46111989983636
N0054	East-African-Indian	sense_Rv0064_165_from_start	0.0533561792965383
N0091	M. africanum	sense_Rv0064_165_from_start	2.18696313943771
N0153	Indo-Oceanic	sense_Rv0064_165_from_start	2.46111989983636
N0157	Indo-Oceanic	sense_Rv0064_165_from_start	2.46111989983636
N1063	M. africanum	sense_Rv0064_165_from_start	2.46111989983636
N1176	M. africanum	sense_Rv0064_165_from_start	2.46111989983636
N1216	Euro-American	sense_Rv0064_165_from_start	0.272907725048739
SEA00042	Euro-American	sense_Rv0064_165_from_start	0
SEA06535	Euro-American	sense_Rv0064_165_from_start	2.46111989983636
SEA07010354	East-African-Indian	sense_Rv0064_165_from_start	0
SEA07020250	Euro-American	sense_Rv0064_165_from_start	0.290237148508276
SEA08151	Indo-Oceanic	sense_Rv0064_165_from_start	2.46111989983636
SEA09020048	Euro-American	sense_Rv0064_165_from_start	0
SEA09167	Euro-American	sense_Rv0064_165_from_start	0.154265707275033
SEA11020038	Euro-American	sense_Rv0064_165_from_start	0
SEA11020057	Euro-American	sense_Rv0064_165_from_start	0.0740675743172786
SEA11020068	Euro-American	sense_Rv0064_165_from_start	2.46111989983636
SEA11020092	Euro-American	sense_Rv0064_165_from_start	0
SEA11278	Lineage 7	sense_Rv0064_165_from_start	2.46111989983636
SEA12126	Indo-Oceanic	sense_Rv0064_165_from_start	2.46111989983636
SEA12202	Indo-Oceanic	sense_Rv0064_165_from_start	2.46111989983636
SEA12334	Indo-Oceanic	sense_Rv0064_165_from_start	2.43652915454745
SEA13111	Indo-Oceanic	sense_Rv0064_165_from_start	2.4152553196062
SEA14117	East-Asian	sense_Rv0064_165_from_start	2.46111989983636
SEA14333	Indo-Oceanic	sense_Rv0064_165_from_start	2.46111989983636
SEA15228	Indo-Oceanic	sense_Rv0064_165_from_start	2.46111989983636
SEA15229	Indo-Oceanic	sense_Rv0064_165_from_start	2.46111989983636
SEA15230	Indo-Oceanic	sense_Rv0064_165_from_start	2.40725082481375
SEA17020023	Indo-Oceanic	sense_Rv0064_165_from_start	2.46111989983636
SEA17020024	Indo-Oceanic	sense_Rv0064_165_from_start	2.46111989983636
SEA17020028	East-Asian	sense_Rv0064_165_from_start	2.46111989983636
SEA17020030	Euro-American	sense_Rv0064_165_from_start	2.38818460359944
1-0006	East-Asian	antisense_Rv0064_172_from_start	2.46111989983636
1-0009	East-Asian	antisense_Rv0064_172_from_start	2.46111989983636
1-0013	East-Asian	antisense_Rv0064_172_from_start	0.210537187455513
1-0017	East-Asian	antisense_Rv0064_172_from_start	2.46111989983636
1-0021	East-African-Indian	antisense_Rv0064_172_from_start	0
1-0028	East-Asian	antisense_Rv0064_172_from_start	2.15969873359574
1-0030	Indo-Oceanic	antisense_Rv0064_172_from_start	2.46111989983636
1-0031	East-Asian	antisense_Rv0064_172_from_start	2.46111989983636
1-0036	Euro-American	antisense_Rv0064_172_from_start	2.46111989983636
1-0039	East-Asian	antisense_Rv0064_172_from_start	2.46111989983636
1-0044	Euro-American	antisense_Rv0064_172_from_start	0
1-0045	East-Asian	antisense_Rv0064_172_from_start	2.46111989983636
1-0047	East-African-Indian	antisense_Rv0064_172_from_start	0
1-0054	East-Asian	antisense_Rv0064_172_from_start	2.46111989983636
1-0056	East-Asian	antisense_Rv0064_172_from_start	2.46111989983636
1-0061	Indo-Oceanic	antisense_Rv0064_172_from_start	2.46111989983636
1-0064	East-Asian	antisense_Rv0064_172_from_start	2.46111989983636
1-0066	East-Asian	antisense_Rv0064_172_from_start	2.46111989983636
1-0069	East-Asian	antisense_Rv0064_172_from_start	2.46111989983636
1-0071	East-Asian	antisense_Rv0064_172_from_start	2.46111989983636
1-0084	East-Asian	antisense_Rv0064_172_from_start	2.46111989983636
1-0102	East-Asian	antisense_Rv0064_172_from_start	2.46111989983636
1-0107	East-African-Indian	antisense_Rv0064_172_from_start	0
1-0110	East-Asian	antisense_Rv0064_172_from_start	0.203888390993638
1-0112	East-Asian	antisense_Rv0064_172_from_start	2.46111989983636
1-0116	East-Asian	antisense_Rv0064_172_from_start	2.46111989983636
1-0123	East-Asian	antisense_Rv0064_172_from_start	2.46111989983636
1-0137	East-Asian	antisense_Rv0064_172_from_start	2.46111989983636
1-0149	East-Asian	antisense_Rv0064_172_from_start	2.03751069763423
1-0150	East-Asian	antisense_Rv0064_172_from_start	2.46111989983636
1-0153	East-Asian	antisense_Rv0064_172_from_start	2.46111989983636
1-0156	Euro-American	antisense_Rv0064_172_from_start	0.38137776160515
2-0013	East-Asian	antisense_Rv0064_172_from_start	2.46111989983636
2-0021	Euro-American	antisense_Rv0064_172_from_start	2.46111989983636
2-0022	Euro-American	antisense_Rv0064_172_from_start	2.42333808190118
2-0023	Euro-American	antisense_Rv0064_172_from_start	2.46111989983636
2-0028	Euro-American	antisense_Rv0064_172_from_start	2.46111989983636
2-0029	Euro-American	antisense_Rv0064_172_from_start	2.46111989983636
2-0034	East-Asian	antisense_Rv0064_172_from_start	2.46111989983636
2-0043-unknown	Euro-American	antisense_Rv0064_172_from_start	2.42160661405827
2-0046	Euro-American	antisense_Rv0064_172_from_start	2.46111989983636
2-0052	East-Asian	antisense_Rv0064_172_from_start	2.46111989983636
2-0068	East-Asian	antisense_Rv0064_172_from_start	2.42302622999169
2-0111	Euro-American	antisense_Rv0064_172_from_start	2.46111989983636
3-0059	Euro-American	antisense_Rv0064_172_from_start	0
3-0090	Indo-Oceanic	antisense_Rv0064_172_from_start	2.46111989983636
3-0096	Indo-Oceanic	antisense_Rv0064_172_from_start	2.46111989983636
3-0124	Indo-Oceanic	antisense_Rv0064_172_from_start	2.46111989983636
4-0012	Euro-American	antisense_Rv0064_172_from_start	2.4317055816853
4-0062	East-Asian	antisense_Rv0064_172_from_start	2.46111989983636
4-0073	Euro-American	antisense_Rv0064_172_from_start	0
4-0077	East-Asian	antisense_Rv0064_172_from_start	2.46111989983636
4-0087	Euro-American	antisense_Rv0064_172_from_start	2.46111989983636
4-0096	East-Asian	antisense_Rv0064_172_from_start	2.46111989983636
N0054	East-African-Indian	antisense_Rv0064_172_from_start	0
N0091	M. africanum	antisense_Rv0064_172_from_start	1.96590964630956
N0153	Indo-Oceanic	antisense_Rv0064_172_from_start	2.46111989983636
N0157	Indo-Oceanic	antisense_Rv0064_172_from_start	2.37325607804768
N1063	M. africanum	antisense_Rv0064_172_from_start	2.46111989983636
N1176	M. africanum	antisense_Rv0064_172_from_start	2.46111989983636
N1216	Euro-American	antisense_Rv0064_172_from_start	0.164514539145221
SEA00042	Euro-American	antisense_Rv0064_172_from_start	0.0455791296361784
SEA06535	Euro-American	antisense_Rv0064_172_from_start	2.46111989983636
SEA07010354	East-African-Indian	antisense_Rv0064_172_from_start	0.173029716605396
SEA07020250	Euro-American	antisense_Rv0064_172_from_start	0.575887615678956
SEA08151	Indo-Oceanic	antisense_Rv0064_172_from_start	2.46111989983636
SEA09020048	Euro-American	antisense_Rv0064_172_from_start	0.0217834732465946
SEA09167	Euro-American	antisense_Rv0064_172_from_start	0.00642023930363922
SEA11020038	Euro-American	antisense_Rv0064_172_from_start	0.308468496755999
SEA11020057	Euro-American	antisense_Rv0064_172_from_start	0
SEA11020068	Euro-American	antisense_Rv0064_172_from_start	2.46111989983636
SEA11020092	Euro-American	antisense_Rv0064_172_from_start	0
SEA11278	Lineage 7	antisense_Rv0064_172_from_start	2.46111989983636
SEA12126	Indo-Oceanic	antisense_Rv0064_172_from_start	2.43539771464411
SEA12202	Indo-Oceanic	antisense_Rv0064_172_from_start	2.27992460735009
SEA12334	Indo-Oceanic	antisense_Rv0064_172_from_start	2.46111989983636
SEA13111	Indo-Oceanic	antisense_Rv0064_172_from_start	2.46111989983636
SEA14117	East-Asian	antisense_Rv0064_172_from_start	2.46111989983636
SEA14333	Indo-Oceanic	antisense_Rv0064_172_from_start	2.43809868621423
SEA15228	Indo-Oceanic	antisense_Rv0064_172_from_start	2.46111989983636
SEA15229	Indo-Oceanic	antisense_Rv0064_172_from_start	2.46111989983636
SEA15230	Indo-Oceanic	antisense_Rv0064_172_from_start	2.36141163625152
SEA17020023	Indo-Oceanic	antisense_Rv0064_172_from_start	2.46111989983636
SEA17020024	Indo-Oceanic	antisense_Rv0064_172_from_start	2.46111989983636
SEA17020028	East-Asian	antisense_Rv0064_172_from_start	2.23551490300774
SEA17020030	Euro-American	antisense_Rv0064_172_from_start	2.46111989983636
1-0006	East-Asian	sense_hycE_203_to_stop	2.44873948274234
1-0009	East-Asian	sense_hycE_203_to_stop	2.46111989983636
1-0013	East-Asian	sense_hycE_203_to_stop	0.252286169928438
1-0017	East-Asian	sense_hycE_203_to_stop	2.46111989983636
1-0021	East-African-Indian	sense_hycE_203_to_stop	0
1-0028	East-Asian	sense_hycE_203_to_stop	2.46111989983636
1-0030	Indo-Oceanic	sense_hycE_203_to_stop	2.3689333807049
1-0031	East-Asian	sense_hycE_203_to_stop	2.46111989983636
1-0036	Euro-American	sense_hycE_203_to_stop	2.34215761604536
1-0039	East-Asian	sense_hycE_203_to_stop	1.30741344897217
1-0044	Euro-American	sense_hycE_203_to_stop	0.0567890132192936
1-0045	East-Asian	sense_hycE_203_to_stop	2.46111989983636
1-0047	East-African-Indian	sense_hycE_203_to_stop	0
1-0054	East-Asian	sense_hycE_203_to_stop	2.46111989983636
1-0056	East-Asian	sense_hycE_203_to_stop	2.3061907004731
1-0061	Indo-Oceanic	sense_hycE_203_to_stop	2.33821385413654
1-0064	East-Asian	sense_hycE_203_to_stop	2.41379795542373
1-0066	East-Asian	sense_hycE_203_to_stop	1.82122789041589
1-0069	East-Asian	sense_hycE_203_to_stop	0.768060069571074
1-0071	East-Asian	sense_hycE_203_to_stop	0.592407230855326
1-0084	East-Asian	sense_hycE_203_to_stop	2.46111989983636
1-0102	East-Asian	sense_hycE_203_to_stop	2.46111989983636
1-0107	East-African-Indian	sense_hycE_203_to_stop	0
1-0110	East-Asian	sense_hycE_203_to_stop	0
1-0112	East-Asian	sense_hycE_203_to_stop	2.36065481591801
1-0116	East-Asian	sense_hycE_203_to_stop	2.41021019059546
1-0123	East-Asian	sense_hycE_203_to_stop	2.46111989983636
1-0137	East-Asian	sense_hycE_203_to_stop	2.46111989983636
1-0149	East-Asian	sense_hycE_203_to_stop	2.46111989983636
1-0150	East-Asian	sense_hycE_203_to_stop	1.19817900351516
1-0153	East-Asian	sense_hycE_203_to_stop	2.36286906776885
1-0156	Euro-American	sense_hycE_203_to_stop	0.00756292505281946
2-0013	East-Asian	sense_hycE_203_to_stop	2.31619513181083
2-0021	Euro-American	sense_hycE_203_to_stop	2.43422715249795
2-0022	Euro-American	sense_hycE_203_to_stop	2.46111989983636
2-0023	Euro-American	sense_hycE_203_to_stop	2.44597004648239
2-0028	Euro-American	sense_hycE_203_to_stop	2.46111989983636
2-0029	Euro-American	sense_hycE_203_to_stop	2.46111989983636
2-0034	East-Asian	sense_hycE_203_to_stop	2.46111989983636
2-0043-unknown	Euro-American	sense_hycE_203_to_stop	2.44926831341264
2-0046	Euro-American	sense_hycE_203_to_stop	2.0266425468086
2-0052	East-Asian	sense_hycE_203_to_stop	2.46111989983636
2-0068	East-Asian	sense_hycE_203_to_stop	2.3069337470677
2-0111	Euro-American	sense_hycE_203_to_stop	2.46111989983636
3-0059	Euro-American	sense_hycE_203_to_stop	0
3-0090	Indo-Oceanic	sense_hycE_203_to_stop	2.46111989983636
3-0096	Indo-Oceanic	sense_hycE_203_to_stop	2.46111989983636
3-0124	Indo-Oceanic	sense_hycE_203_to_stop	2.46111989983636
4-0012	Euro-American	sense_hycE_203_to_stop	2.46111989983636
4-0062	East-Asian	sense_hycE_203_to_stop	2.46111989983636
4-0073	Euro-American	sense_hycE_203_to_stop	0
4-0077	East-Asian	sense_hycE_203_to_stop	2.46111989983636
4-0087	Euro-American	sense_hycE_203_to_stop	2.46111989983636
4-0096	East-Asian	sense_hycE_203_to_stop	2.46111989983636
N0054	East-African-Indian	sense_hycE_203_to_stop	0.193379695024989
N0091	M. africanum	sense_hycE_203_to_stop	0.496535224424687
N0153	Indo-Oceanic	sense_hycE_203_to_stop	2.46111989983636
N0157	Indo-Oceanic	sense_hycE_203_to_stop	2.2351799426447
N1063	M. africanum	sense_hycE_203_to_stop	2.46111989983636
N1176	M. africanum	sense_hycE_203_to_stop	2.46111989983636
N1216	Euro-American	sense_hycE_203_to_stop	0
SEA00042	Euro-American	sense_hycE_203_to_stop	0
SEA06535	Euro-American	sense_hycE_203_to_stop	2.06765614577996
SEA07010354	East-African-Indian	sense_hycE_203_to_stop	0
SEA07020250	Euro-American	sense_hycE_203_to_stop	0
SEA08151	Indo-Oceanic	sense_hycE_203_to_stop	2.46111989983636
SEA09020048	Euro-American	sense_hycE_203_to_stop	0.211350317740647
SEA09167	Euro-American	sense_hycE_203_to_stop	0
SEA11020038	Euro-American	sense_hycE_203_to_stop	0
SEA11020057	Euro-American	sense_hycE_203_to_stop	0.112106935336453
SEA11020068	Euro-American	sense_hycE_203_to_stop	2.3637826665917
SEA11020092	Euro-American	sense_hycE_203_to_stop	0.0780282270670743
SEA11278	Lineage 7	sense_hycE_203_to_stop	2.46111989983636
SEA12126	Indo-Oceanic	sense_hycE_203_to_stop	2.46111989983636
SEA12202	Indo-Oceanic	sense_hycE_203_to_stop	2.3953319825876
SEA12334	Indo-Oceanic	sense_hycE_203_to_stop	2.46111989983636
SEA13111	Indo-Oceanic	sense_hycE_203_to_stop	2.46111989983636
SEA14333	Indo-Oceanic	sense_hycE_203_to_stop	2.46111989983636
SEA15228	Indo-Oceanic	sense_hycE_203_to_stop	2.46111989983636
SEA15229	Indo-Oceanic	sense_hycE_203_to_stop	2.46111989983636
SEA15230	Indo-Oceanic	sense_hycE_203_to_stop	2.46111989983636
SEA17020023	Indo-Oceanic	sense_hycE_203_to_stop	2.46111989983636
SEA17020024	Indo-Oceanic	sense_hycE_203_to_stop	2.46111989983636
SEA17020028	East-Asian	sense_hycE_203_to_stop	2.46111989983636
SEA17020030	Euro-American	sense_hycE_203_to_stop	2.16906880197918
1-0006	East-Asian	antisense_hycE_196_to_stop	2.46111989983636
1-0009	East-Asian	antisense_hycE_196_to_stop	2.20129996668838
1-0013	East-Asian	antisense_hycE_196_to_stop	0
1-0017	East-Asian	antisense_hycE_196_to_stop	2.32418339136796
1-0021	East-African-Indian	antisense_hycE_196_to_stop	0
1-0028	East-Asian	antisense_hycE_196_to_stop	2.16927569174758
1-0030	Indo-Oceanic	antisense_hycE_196_to_stop	2.46111989983636
1-0031	East-Asian	antisense_hycE_196_to_stop	2.46111989983636
1-0036	Euro-American	antisense_hycE_196_to_stop	2.05440663647608
1-0039	East-Asian	antisense_hycE_196_to_stop	0.491572061026739
1-0044	Euro-American	antisense_hycE_196_to_stop	0
1-0045	East-Asian	antisense_hycE_196_to_stop	2.46111989983636
1-0047	East-African-Indian	antisense_hycE_196_to_stop	0
1-0054	East-Asian	antisense_hycE_196_to_stop	2.46111989983636
1-0056	East-Asian	antisense_hycE_196_to_stop	2.09196064909001
1-0061	Indo-Oceanic	antisense_hycE_196_to_stop	2.4307427385824
1-0064	East-Asian	antisense_hycE_196_to_stop	1.89023599936672
1-0066	East-Asian	antisense_hycE_196_to_stop	2.10572170415477
1-0069	East-Asian	antisense_hycE_196_to_stop	0.407924702828599
1-0071	East-Asian	antisense_hycE_196_to_stop	0
1-0084	East-Asian	antisense_hycE_196_to_stop	1.9490164065904
1-0102	East-Asian	antisense_hycE_196_to_stop	2.1866857782555
1-0107	East-African-Indian	antisense_hycE_196_to_stop	0
1-0110	East-Asian	antisense_hycE_196_to_stop	0
1-0112	East-Asian	antisense_hycE_196_to_stop	1.86340010509462
1-0116	East-Asian	antisense_hycE_196_to_stop	2.34183371538808
1-0123	East-Asian	antisense_hycE_196_to_stop	1.92156024179655
1-0137	East-Asian	antisense_hycE_196_to_stop	1.66922247695408
1-0149	East-Asian	antisense_hycE_196_to_stop	2.21630699456641
1-0150	East-Asian	antisense_hycE_196_to_stop	2.46111989983636
1-0153	East-Asian	antisense_hycE_196_to_stop	2.19939331730278
1-0156	Euro-American	antisense_hycE_196_to_stop	0.382583524350547
2-0013	East-Asian	antisense_hycE_196_to_stop	2.28105004552987
2-0021	Euro-American	antisense_hycE_196_to_stop	2.02891840529293
2-0022	Euro-American	antisense_hycE_196_to_stop	1.91475614207428
2-0023	Euro-American	antisense_hycE_196_to_stop	1.75232270649143
2-0028	Euro-American	antisense_hycE_196_to_stop	1.76514863921913
2-0029	Euro-American	antisense_hycE_196_to_stop	1.93993903043251
2-0034	East-Asian	antisense_hycE_196_to_stop	2.34127389258737
2-0043-unknown	Euro-American	antisense_hycE_196_to_stop	1.9908741322281
2-0046	Euro-American	antisense_hycE_196_to_stop	1.86369989089729
2-0052	East-Asian	antisense_hycE_196_to_stop	2.12274042501442
2-0068	East-Asian	antisense_hycE_196_to_stop	1.99010783108786
2-0111	Euro-American	antisense_hycE_196_to_stop	2.14386394427019
3-0059	Euro-American	antisense_hycE_196_to_stop	0
3-0090	Indo-Oceanic	antisense_hycE_196_to_stop	2.34693513011434
3-0096	Indo-Oceanic	antisense_hycE_196_to_stop	2.30451834530504
3-0124	Indo-Oceanic	antisense_hycE_196_to_stop	2.46111989983636
4-0012	Euro-American	antisense_hycE_196_to_stop	2.19571772880915
4-0062	East-Asian	antisense_hycE_196_to_stop	2.13411961524263
4-0073	Euro-American	antisense_hycE_196_to_stop	0.112673744240622
4-0077	East-Asian	antisense_hycE_196_to_stop	2.02644757521124
4-0087	Euro-American	antisense_hycE_196_to_stop	2.06365260173571
4-0096	East-Asian	antisense_hycE_196_to_stop	2.31769814012486
N0054	East-African-Indian	antisense_hycE_196_to_stop	0
N0091	M. africanum	antisense_hycE_196_to_stop	0.188507946353586
N0153	Indo-Oceanic	antisense_hycE_196_to_stop	2.41120681444543
N0157	Indo-Oceanic	antisense_hycE_196_to_stop	1.8705512594456
N1063	M. africanum	antisense_hycE_196_to_stop	2.23772115104396
N1176	M. africanum	antisense_hycE_196_to_stop	2.23203847194395
N1216	Euro-American	antisense_hycE_196_to_stop	0
SEA00042	Euro-American	antisense_hycE_196_to_stop	0
SEA06535	Euro-American	antisense_hycE_196_to_stop	2.16187148739761
SEA07010354	East-African-Indian	antisense_hycE_196_to_stop	0
SEA07020250	Euro-American	antisense_hycE_196_to_stop	0.158531469296454
SEA08151	Indo-Oceanic	antisense_hycE_196_to_stop	2.37058821094511
SEA09020048	Euro-American	antisense_hycE_196_to_stop	0
SEA09167	Euro-American	antisense_hycE_196_to_stop	0
SEA11020038	Euro-American	antisense_hycE_196_to_stop	0
SEA11020057	Euro-American	antisense_hycE_196_to_stop	0
SEA11020068	Euro-American	antisense_hycE_196_to_stop	2.09095120725923
SEA11020092	Euro-American	antisense_hycE_196_to_stop	0.0907892492035577
SEA11278	Lineage 7	antisense_hycE_196_to_stop	2.0388007115701
SEA12126	Indo-Oceanic	antisense_hycE_196_to_stop	2.34869782676889
SEA12202	Indo-Oceanic	antisense_hycE_196_to_stop	2.00723393800397
SEA12334	Indo-Oceanic	antisense_hycE_196_to_stop	2.24502229760365
SEA13111	Indo-Oceanic	antisense_hycE_196_to_stop	2.38118773804404
SEA14333	Indo-Oceanic	antisense_hycE_196_to_stop	2.46111989983636
SEA15228	Indo-Oceanic	antisense_hycE_196_to_stop	2.46111989983636
SEA15229	Indo-Oceanic	antisense_hycE_196_to_stop	2.46111989983636
SEA15230	Indo-Oceanic	antisense_hycE_196_to_stop	2.30494170144774
SEA17020023	Indo-Oceanic	antisense_hycE_196_to_stop	2.31196477896515
SEA17020024	Indo-Oceanic	antisense_hycE_196_to_stop	1.88615234756784
SEA17020028	East-Asian	antisense_hycE_196_to_stop	2.1389034326783
SEA17020030	Euro-American	antisense_hycE_196_to_stop	2.01917337149612
1-0006	East-Asian	sense_PPE1_0_from_start	2.21013247192329
1-0009	East-Asian	sense_PPE1_0_from_start	2.46111989983636
1-0013	East-Asian	sense_PPE1_0_from_start	0
1-0017	East-Asian	sense_PPE1_0_from_start	2.44944589003725
1-0021	East-African-Indian	sense_PPE1_0_from_start	0
1-0028	East-Asian	sense_PPE1_0_from_start	2.46111989983636
1-0030	Indo-Oceanic	sense_PPE1_0_from_start	2.24506554784368
1-0031	East-Asian	sense_PPE1_0_from_start	2.46111989983636
1-0036	Euro-American	sense_PPE1_0_from_start	2.46111989983636
1-0039	East-Asian	sense_PPE1_0_from_start	2.46111989983636
1-0044	Euro-American	sense_PPE1_0_from_start	0
1-0045	East-Asian	sense_PPE1_0_from_start	2.46111989983636
1-0047	East-African-Indian	sense_PPE1_0_from_start	0
1-0054	East-Asian	sense_PPE1_0_from_start	2.46111989983636
1-0056	East-Asian	sense_PPE1_0_from_start	2.46111989983636
1-0061	Indo-Oceanic	sense_PPE1_0_from_start	2.32738908024495
1-0064	East-Asian	sense_PPE1_0_from_start	2.07411055949325
1-0066	East-Asian	sense_PPE1_0_from_start	2.46111989983636
1-0069	East-Asian	sense_PPE1_0_from_start	2.46111989983636
1-0071	East-Asian	sense_PPE1_0_from_start	2.32324054336245
1-0084	East-Asian	sense_PPE1_0_from_start	2.30602696063321
1-0102	East-Asian	sense_PPE1_0_from_start	2.37876453821579
1-0107	East-African-Indian	sense_PPE1_0_from_start	0
1-0110	East-Asian	sense_PPE1_0_from_start	0
1-0112	East-Asian	sense_PPE1_0_from_start	2.33120490475693
1-0116	East-Asian	sense_PPE1_0_from_start	2.31695658159185
1-0123	East-Asian	sense_PPE1_0_from_start	2.23875577702062
1-0137	East-Asian	sense_PPE1_0_from_start	2.21168602448867
1-0149	East-Asian	sense_PPE1_0_from_start	2.43963934364533
1-0150	East-Asian	sense_PPE1_0_from_start	2.43992887579861
1-0153	East-Asian	sense_PPE1_0_from_start	2.46111989983636
1-0156	Euro-American	sense_PPE1_0_from_start	0
2-0013	East-Asian	sense_PPE1_0_from_start	2.33876554338616
2-0021	Euro-American	sense_PPE1_0_from_start	2.24968955636151
2-0022	Euro-American	sense_PPE1_0_from_start	2.46111989983636
2-0023	Euro-American	sense_PPE1_0_from_start	2.46111989983636
2-0028	Euro-American	sense_PPE1_0_from_start	2.46111989983636
2-0029	Euro-American	sense_PPE1_0_from_start	2.46111989983636
2-0034	East-Asian	sense_PPE1_0_from_start	2.46111989983636
2-0043-unknown	Euro-American	sense_PPE1_0_from_start	2.16240377049774
2-0046	Euro-American	sense_PPE1_0_from_start	2.33292803639108
2-0052	East-Asian	sense_PPE1_0_from_start	2.46111989983636
2-0068	East-Asian	sense_PPE1_0_from_start	2.22054460137937
2-0111	Euro-American	sense_PPE1_0_from_start	2.46111989983636
3-0059	Euro-American	sense_PPE1_0_from_start	0
3-0090	Indo-Oceanic	sense_PPE1_0_from_start	2.46111989983636
3-0096	Indo-Oceanic	sense_PPE1_0_from_start	2.40789111391972
3-0124	Indo-Oceanic	sense_PPE1_0_from_start	1.97914918469374
4-0012	Euro-American	sense_PPE1_0_from_start	2.46111989983636
4-0062	East-Asian	sense_PPE1_0_from_start	2.32626087092012
4-0073	Euro-American	sense_PPE1_0_from_start	0.0190996289284244
4-0077	East-Asian	sense_PPE1_0_from_start	2.46111989983636
4-0087	Euro-American	sense_PPE1_0_from_start	2.46111989983636
4-0096	East-Asian	sense_PPE1_0_from_start	2.34552312409978
N0054	East-African-Indian	sense_PPE1_0_from_start	0
N0091	M. africanum	sense_PPE1_0_from_start	2.46111989983636
N0153	Indo-Oceanic	sense_PPE1_0_from_start	2.46111989983636
N0157	Indo-Oceanic	sense_PPE1_0_from_start	2.46111989983636
N1063	M. africanum	sense_PPE1_0_from_start	2.46111989983636
N1176	M. africanum	sense_PPE1_0_from_start	2.46111989983636
N1216	Euro-American	sense_PPE1_0_from_start	0
SEA00042	Euro-American	sense_PPE1_0_from_start	0.294800779023604
SEA06535	Euro-American	sense_PPE1_0_from_start	2.46111989983636
SEA07010354	East-African-Indian	sense_PPE1_0_from_start	0
SEA07020250	Euro-American	sense_PPE1_0_from_start	0
SEA08151	Indo-Oceanic	sense_PPE1_0_from_start	2.33339263777863
SEA09020048	Euro-American	sense_PPE1_0_from_start	0
SEA09167	Euro-American	sense_PPE1_0_from_start	0
SEA11020038	Euro-American	sense_PPE1_0_from_start	0
SEA11020057	Euro-American	sense_PPE1_0_from_start	0
SEA11020068	Euro-American	sense_PPE1_0_from_start	2.38356691635405
SEA11020092	Euro-American	sense_PPE1_0_from_start	0
SEA11278	Lineage 7	sense_PPE1_0_from_start	2.40022251088744
SEA12126	Indo-Oceanic	sense_PPE1_0_from_start	2.40779445981841
SEA12202	Indo-Oceanic	sense_PPE1_0_from_start	2.10647709431121
SEA12334	Indo-Oceanic	sense_PPE1_0_from_start	2.46111989983636
SEA13111	Indo-Oceanic	sense_PPE1_0_from_start	2.46111989983636
SEA14117	East-Asian	sense_PPE1_0_from_start	2.46111989983636
SEA14333	Indo-Oceanic	sense_PPE1_0_from_start	2.46111989983636
SEA15228	Indo-Oceanic	sense_PPE1_0_from_start	2.31125934226601
SEA15229	Indo-Oceanic	sense_PPE1_0_from_start	2.46111989983636
SEA15230	Indo-Oceanic	sense_PPE1_0_from_start	2.46111989983636
SEA17020023	Indo-Oceanic	sense_PPE1_0_from_start	2.41512899252203
SEA17020024	Indo-Oceanic	sense_PPE1_0_from_start	2.46111989983636
SEA17020028	East-Asian	sense_PPE1_0_from_start	2.46111989983636
SEA17020030	Euro-American	sense_PPE1_0_from_start	2.41933712392438
1-0006	East-Asian	antisense_PPE1_7_from_start	2.46111989983636
1-0009	East-Asian	antisense_PPE1_7_from_start	2.00374281057583
1-0013	East-Asian	antisense_PPE1_7_from_start	0.00178444266148521
1-0017	East-Asian	antisense_PPE1_7_from_start	2.46111989983636
1-0021	East-African-Indian	antisense_PPE1_7_from_start	0.19482973250954
1-0028	East-Asian	antisense_PPE1_7_from_start	2.20762423881484
1-0030	Indo-Oceanic	antisense_PPE1_7_from_start	2.27289975604041
1-0031	East-Asian	antisense_PPE1_7_from_start	2.35367132787017
1-0036	Euro-American	antisense_PPE1_7_from_start	2.46111989983636
1-0039	East-Asian	antisense_PPE1_7_from_start	2.40299498328734
1-0044	Euro-American	antisense_PPE1_7_from_start	0.205624195330621
1-0045	East-Asian	antisense_PPE1_7_from_start	2.46111989983636
1-0047	East-African-Indian	antisense_PPE1_7_from_start	0.0996365048882131
1-0054	East-Asian	antisense_PPE1_7_from_start	2.36746501879513
1-0056	East-Asian	antisense_PPE1_7_from_start	2.31928635808478
1-0061	Indo-Oceanic	antisense_PPE1_7_from_start	2.46111989983636
1-0064	East-Asian	antisense_PPE1_7_from_start	2.30547565587155
1-0066	East-Asian	antisense_PPE1_7_from_start	2.46111989983636
1-0069	East-Asian	antisense_PPE1_7_from_start	2.44770219411668
1-0071	East-Asian	antisense_PPE1_7_from_start	2.37450220051119
1-0084	East-Asian	antisense_PPE1_7_from_start	2.46111989983636
1-0102	East-Asian	antisense_PPE1_7_from_start	2.46111989983636
1-0107	East-African-Indian	antisense_PPE1_7_from_start	0
1-0110	East-Asian	antisense_PPE1_7_from_start	0
1-0112	East-Asian	antisense_PPE1_7_from_start	2.46111989983636
1-0116	East-Asian	antisense_PPE1_7_from_start	2.20577528111457
1-0123	East-Asian	antisense_PPE1_7_from_start	2.43442169398941
1-0137	East-Asian	antisense_PPE1_7_from_start	2.11126653186493
1-0149	East-Asian	antisense_PPE1_7_from_start	2.41088413437018
1-0150	East-Asian	antisense_PPE1_7_from_start	2.46111989983636
1-0153	East-Asian	antisense_PPE1_7_from_start	2.46111989983636
1-0156	Euro-American	antisense_PPE1_7_from_start	0
2-0013	East-Asian	antisense_PPE1_7_from_start	1.84251335052215
2-0021	Euro-American	antisense_PPE1_7_from_start	2.43422715249795
2-0022	Euro-American	antisense_PPE1_7_from_start	2.43251994290754
2-0023	Euro-American	antisense_PPE1_7_from_start	2.42028831965297
2-0028	Euro-American	antisense_PPE1_7_from_start	2.36140021829471
2-0029	Euro-American	antisense_PPE1_7_from_start	2.46111989983636
2-0034	East-Asian	antisense_PPE1_7_from_start	2.46111989983636
2-0043-unknown	Euro-American	antisense_PPE1_7_from_start	2.30777408279047
2-0046	Euro-American	antisense_PPE1_7_from_start	2.44964376916819
2-0052	East-Asian	antisense_PPE1_7_from_start	2.32646458869201
2-0068	East-Asian	antisense_PPE1_7_from_start	2.46111989983636
2-0111	Euro-American	antisense_PPE1_7_from_start	2.46111989983636
3-0059	Euro-American	antisense_PPE1_7_from_start	0
3-0090	Indo-Oceanic	antisense_PPE1_7_from_start	2.2826327336731
3-0096	Indo-Oceanic	antisense_PPE1_7_from_start	2.09751619421352
3-0124	Indo-Oceanic	antisense_PPE1_7_from_start	2.46111989983636
4-0012	Euro-American	antisense_PPE1_7_from_start	2.46111989983636
4-0062	East-Asian	antisense_PPE1_7_from_start	2.36769466368842
4-0073	Euro-American	antisense_PPE1_7_from_start	0.0887805379296298
4-0077	East-Asian	antisense_PPE1_7_from_start	2.23361460808721
4-0087	Euro-American	antisense_PPE1_7_from_start	2.00315639992476
4-0096	East-Asian	antisense_PPE1_7_from_start	2.34864492042948
N0054	East-African-Indian	antisense_PPE1_7_from_start	0
N0091	M. africanum	antisense_PPE1_7_from_start	2.24542398596671
N0153	Indo-Oceanic	antisense_PPE1_7_from_start	2.4018896261563
N0157	Indo-Oceanic	antisense_PPE1_7_from_start	2.46111989983636
N1063	M. africanum	antisense_PPE1_7_from_start	2.46111989983636
N1176	M. africanum	antisense_PPE1_7_from_start	2.46111989983636
N1216	Euro-American	antisense_PPE1_7_from_start	0
SEA00042	Euro-American	antisense_PPE1_7_from_start	0
SEA06535	Euro-American	antisense_PPE1_7_from_start	2.46111989983636
SEA07010354	East-African-Indian	antisense_PPE1_7_from_start	0.0581069340875178
SEA07020250	Euro-American	antisense_PPE1_7_from_start	0.229678316260593
SEA08151	Indo-Oceanic	antisense_PPE1_7_from_start	2.46111989983636
SEA09020048	Euro-American	antisense_PPE1_7_from_start	0.717652228429686
SEA09167	Euro-American	antisense_PPE1_7_from_start	0.125883905905211
SEA11020038	Euro-American	antisense_PPE1_7_from_start	0
SEA11020057	Euro-American	antisense_PPE1_7_from_start	0.0121881267306003
SEA11020068	Euro-American	antisense_PPE1_7_from_start	2.46111989983636
SEA11020092	Euro-American	antisense_PPE1_7_from_start	0.00649910449589789
SEA11278	Lineage 7	antisense_PPE1_7_from_start	2.46111989983636
SEA12126	Indo-Oceanic	antisense_PPE1_7_from_start	2.4048150829124
SEA12202	Indo-Oceanic	antisense_PPE1_7_from_start	2.26226370457994
SEA12334	Indo-Oceanic	antisense_PPE1_7_from_start	2.46111989983636
SEA13111	Indo-Oceanic	antisense_PPE1_7_from_start	2.28620024842556
SEA14117	East-Asian	antisense_PPE1_7_from_start	2.23384383644336
SEA14333	Indo-Oceanic	antisense_PPE1_7_from_start	1.80471441302311
SEA15228	Indo-Oceanic	antisense_PPE1_7_from_start	2.32119087194845
SEA15229	Indo-Oceanic	antisense_PPE1_7_from_start	2.38006716274445
SEA15230	Indo-Oceanic	antisense_PPE1_7_from_start	2.22946370559846
SEA17020023	Indo-Oceanic	antisense_PPE1_7_from_start	2.24264447750895
SEA17020024	Indo-Oceanic	antisense_PPE1_7_from_start	1.84036141168012
SEA17020028	East-Asian	antisense_PPE1_7_from_start	2.16391428331324
SEA17020030	Euro-American	antisense_PPE1_7_from_start	2.45762298801834
1-0006	East-Asian	antisense_ctpB_207_to_stop	2.46111989983636
1-0009	East-Asian	antisense_ctpB_207_to_stop	2.46111989983636
1-0013	East-Asian	antisense_ctpB_207_to_stop	0
1-0017	East-Asian	antisense_ctpB_207_to_stop	2.46111989983636
1-0021	East-African-Indian	antisense_ctpB_207_to_stop	0.385941387766327
1-0028	East-Asian	antisense_ctpB_207_to_stop	2.46111989983636
1-0030	Indo-Oceanic	antisense_ctpB_207_to_stop	2.46111989983636
1-0031	East-Asian	antisense_ctpB_207_to_stop	2.46111989983636
1-0036	Euro-American	antisense_ctpB_207_to_stop	2.46111989983636
1-0039	East-Asian	antisense_ctpB_207_to_stop	2.42739336214209
1-0044	Euro-American	antisense_ctpB_207_to_stop	0.477926712034556
1-0045	East-Asian	antisense_ctpB_207_to_stop	2.46111989983636
1-0047	East-African-Indian	antisense_ctpB_207_to_stop	0.301331086823919
1-0054	East-Asian	antisense_ctpB_207_to_stop	2.46111989983636
1-0056	East-Asian	antisense_ctpB_207_to_stop	2.46111989983636
1-0061	Indo-Oceanic	antisense_ctpB_207_to_stop	2.46111989983636
1-0064	East-Asian	antisense_ctpB_207_to_stop	2.46111989983636
1-0066	East-Asian	antisense_ctpB_207_to_stop	2.46111989983636
1-0069	East-Asian	antisense_ctpB_207_to_stop	2.46111989983636
1-0071	East-Asian	antisense_ctpB_207_to_stop	2.46111989983636
1-0084	East-Asian	antisense_ctpB_207_to_stop	2.46111989983636
1-0102	East-Asian	antisense_ctpB_207_to_stop	2.46111989983636
1-0107	East-African-Indian	antisense_ctpB_207_to_stop	0
1-0110	East-Asian	antisense_ctpB_207_to_stop	0
1-0112	East-Asian	antisense_ctpB_207_to_stop	2.46111989983636
1-0116	East-Asian	antisense_ctpB_207_to_stop	2.46111989983636
1-0123	East-Asian	antisense_ctpB_207_to_stop	2.46111989983636
1-0137	East-Asian	antisense_ctpB_207_to_stop	2.46111989983636
1-0149	East-Asian	antisense_ctpB_207_to_stop	2.46111989983636
1-0150	East-Asian	antisense_ctpB_207_to_stop	2.46111989983636
1-0153	East-Asian	antisense_ctpB_207_to_stop	2.46111989983636
1-0156	Euro-American	antisense_ctpB_207_to_stop	0.236860871233861
2-0013	East-Asian	antisense_ctpB_207_to_stop	2.46111989983636
2-0021	Euro-American	antisense_ctpB_207_to_stop	2.46111989983636
2-0022	Euro-American	antisense_ctpB_207_to_stop	2.43194778543786
2-0023	Euro-American	antisense_ctpB_207_to_stop	2.46111989983636
2-0028	Euro-American	antisense_ctpB_207_to_stop	2.46111989983636
2-0029	Euro-American	antisense_ctpB_207_to_stop	2.46111989983636
2-0034	East-Asian	antisense_ctpB_207_to_stop	2.46111989983636
2-0043-unknown	Euro-American	antisense_ctpB_207_to_stop	2.46111989983636
2-0046	Euro-American	antisense_ctpB_207_to_stop	2.46111989983636
2-0052	East-Asian	antisense_ctpB_207_to_stop	2.46111989983636
2-0068	East-Asian	antisense_ctpB_207_to_stop	2.46111989983636
2-0111	Euro-American	antisense_ctpB_207_to_stop	2.46111989983636
3-0059	Euro-American	antisense_ctpB_207_to_stop	0
3-0090	Indo-Oceanic	antisense_ctpB_207_to_stop	2.46111989983636
3-0096	Indo-Oceanic	antisense_ctpB_207_to_stop	2.46111989983636
3-0124	Indo-Oceanic	antisense_ctpB_207_to_stop	2.46111989983636
4-0012	Euro-American	antisense_ctpB_207_to_stop	2.46111989983636
4-0062	East-Asian	antisense_ctpB_207_to_stop	2.46111989983636
4-0073	Euro-American	antisense_ctpB_207_to_stop	0
4-0077	East-Asian	antisense_ctpB_207_to_stop	2.44425819865923
4-0087	Euro-American	antisense_ctpB_207_to_stop	2.46111989983636
4-0096	East-Asian	antisense_ctpB_207_to_stop	2.46111989983636
N0054	East-African-Indian	antisense_ctpB_207_to_stop	0
N0091	M. africanum	antisense_ctpB_207_to_stop	1.59766635850966
N0153	Indo-Oceanic	antisense_ctpB_207_to_stop	2.46111989983636
N0157	Indo-Oceanic	antisense_ctpB_207_to_stop	2.46111989983636
N1063	M. africanum	antisense_ctpB_207_to_stop	2.46111989983636
N1176	M. africanum	antisense_ctpB_207_to_stop	2.46111989983636
N1216	Euro-American	antisense_ctpB_207_to_stop	0.152822214572261
SEA00042	Euro-American	antisense_ctpB_207_to_stop	0.219838721342382
SEA06535	Euro-American	antisense_ctpB_207_to_stop	2.46111989983636
SEA07010354	East-African-Indian	antisense_ctpB_207_to_stop	0.221451238056951
SEA07020250	Euro-American	antisense_ctpB_207_to_stop	0
SEA08151	Indo-Oceanic	antisense_ctpB_207_to_stop	2.46111989983636
SEA09020048	Euro-American	antisense_ctpB_207_to_stop	0.429931125127075
SEA09167	Euro-American	antisense_ctpB_207_to_stop	0
SEA11020038	Euro-American	antisense_ctpB_207_to_stop	0
SEA11020057	Euro-American	antisense_ctpB_207_to_stop	0.0754435353570958
SEA11020068	Euro-American	antisense_ctpB_207_to_stop	2.46111989983636
SEA11020092	Euro-American	antisense_ctpB_207_to_stop	0
SEA11278	Lineage 7	antisense_ctpB_207_to_stop	2.46111989983636
SEA12126	Indo-Oceanic	antisense_ctpB_207_to_stop	2.46111989983636
SEA12202	Indo-Oceanic	antisense_ctpB_207_to_stop	2.46111989983636
SEA12334	Indo-Oceanic	antisense_ctpB_207_to_stop	2.46111989983636
SEA13111	Indo-Oceanic	antisense_ctpB_207_to_stop	2.46111989983636
SEA14117	East-Asian	antisense_ctpB_207_to_stop	2.46111989983636
SEA14333	Indo-Oceanic	antisense_ctpB_207_to_stop	2.46111989983636
SEA15228	Indo-Oceanic	antisense_ctpB_207_to_stop	2.46111989983636
SEA15229	Indo-Oceanic	antisense_ctpB_207_to_stop	2.46111989983636
SEA15230	Indo-Oceanic	antisense_ctpB_207_to_stop	2.46111989983636
SEA17020023	Indo-Oceanic	antisense_ctpB_207_to_stop	2.30961893285335
SEA17020024	Indo-Oceanic	antisense_ctpB_207_to_stop	2.46111989983636
SEA17020028	East-Asian	antisense_ctpB_207_to_stop	2.46111989983636
SEA17020030	Euro-American	antisense_ctpB_207_to_stop	2.46111989983636
1-0006	East-Asian	sense_ctpB_214_to_stop	2.28591642970475
1-0009	East-Asian	sense_ctpB_214_to_stop	2.46111989983636
1-0013	East-Asian	sense_ctpB_214_to_stop	0.120580490716616
1-0017	East-Asian	sense_ctpB_214_to_stop	2.46111989983636
1-0021	East-African-Indian	sense_ctpB_214_to_stop	0
1-0028	East-Asian	sense_ctpB_214_to_stop	2.46111989983636
1-0030	Indo-Oceanic	sense_ctpB_214_to_stop	2.46111989983636
1-0031	East-Asian	sense_ctpB_214_to_stop	2.46111989983636
1-0036	Euro-American	sense_ctpB_214_to_stop	2.46111989983636
1-0039	East-Asian	sense_ctpB_214_to_stop	2.3182517765478
1-0044	Euro-American	sense_ctpB_214_to_stop	0.144674845366289
1-0045	East-Asian	sense_ctpB_214_to_stop	2.46111989983636
1-0047	East-African-Indian	sense_ctpB_214_to_stop	0.105212144836379
1-0054	East-Asian	sense_ctpB_214_to_stop	2.46111989983636
1-0056	East-Asian	sense_ctpB_214_to_stop	2.46111989983636
1-0061	Indo-Oceanic	sense_ctpB_214_to_stop	2.46111989983636
1-0064	East-Asian	sense_ctpB_214_to_stop	2.46111989983636
1-0066	East-Asian	sense_ctpB_214_to_stop	2.46111989983636
1-0069	East-Asian	sense_ctpB_214_to_stop	2.21132342028394
1-0071	East-Asian	sense_ctpB_214_to_stop	2.46111989983636
1-0084	East-Asian	sense_ctpB_214_to_stop	2.46111989983636
1-0102	East-Asian	sense_ctpB_214_to_stop	2.46111989983636
1-0107	East-African-Indian	sense_ctpB_214_to_stop	0.385472709897281
1-0110	East-Asian	sense_ctpB_214_to_stop	0.107673075734335
1-0112	East-Asian	sense_ctpB_214_to_stop	2.46111989983636
1-0116	East-Asian	sense_ctpB_214_to_stop	2.42714374086014
1-0123	East-Asian	sense_ctpB_214_to_stop	2.46111989983636
1-0137	East-Asian	sense_ctpB_214_to_stop	2.46111989983636
1-0149	East-Asian	sense_ctpB_214_to_stop	2.46111989983636
1-0150	East-Asian	sense_ctpB_214_to_stop	2.4205714248516
1-0153	East-Asian	sense_ctpB_214_to_stop	2.4340516037489
1-0156	Euro-American	sense_ctpB_214_to_stop	0.694594487945641
2-0013	East-Asian	sense_ctpB_214_to_stop	2.44469116506698
2-0021	Euro-American	sense_ctpB_214_to_stop	2.46111989983636
2-0022	Euro-American	sense_ctpB_214_to_stop	2.46111989983636
2-0023	Euro-American	sense_ctpB_214_to_stop	2.35473885472923
2-0028	Euro-American	sense_ctpB_214_to_stop	2.38207547957637
2-0029	Euro-American	sense_ctpB_214_to_stop	2.46111989983636
2-0034	East-Asian	sense_ctpB_214_to_stop	2.46111989983636
2-0043-unknown	Euro-American	sense_ctpB_214_to_stop	2.46111989983636
2-0046	Euro-American	sense_ctpB_214_to_stop	2.35434638020012
2-0052	East-Asian	sense_ctpB_214_to_stop	2.46111989983636
2-0068	East-Asian	sense_ctpB_214_to_stop	2.28634265229445
2-0111	Euro-American	sense_ctpB_214_to_stop	2.37137060500155
3-0059	Euro-American	sense_ctpB_214_to_stop	0
3-0090	Indo-Oceanic	sense_ctpB_214_to_stop	2.46111989983636
3-0096	Indo-Oceanic	sense_ctpB_214_to_stop	2.46111989983636
3-0124	Indo-Oceanic	sense_ctpB_214_to_stop	2.46111989983636
4-0012	Euro-American	sense_ctpB_214_to_stop	2.35134649944361
4-0062	East-Asian	sense_ctpB_214_to_stop	2.37396478238835
4-0073	Euro-American	sense_ctpB_214_to_stop	0
4-0077	East-Asian	sense_ctpB_214_to_stop	2.46111989983636
4-0087	Euro-American	sense_ctpB_214_to_stop	2.19759316076321
4-0096	East-Asian	sense_ctpB_214_to_stop	2.46111989983636
N0054	East-African-Indian	sense_ctpB_214_to_stop	0.470819250249476
N0091	M. africanum	sense_ctpB_214_to_stop	1.27364385961417
N0153	Indo-Oceanic	sense_ctpB_214_to_stop	2.46111989983636
N0157	Indo-Oceanic	sense_ctpB_214_to_stop	2.46111989983636
N1063	M. africanum	sense_ctpB_214_to_stop	2.46111989983636
N1176	M. africanum	sense_ctpB_214_to_stop	2.46111989983636
N1216	Euro-American	sense_ctpB_214_to_stop	0
SEA00042	Euro-American	sense_ctpB_214_to_stop	0
SEA06535	Euro-American	sense_ctpB_214_to_stop	2.46111989983636
SEA07010354	East-African-Indian	sense_ctpB_214_to_stop	0.144806556782629
SEA07020250	Euro-American	sense_ctpB_214_to_stop	0
SEA08151	Indo-Oceanic	sense_ctpB_214_to_stop	2.46111989983636
SEA09020048	Euro-American	sense_ctpB_214_to_stop	0
SEA09167	Euro-American	sense_ctpB_214_to_stop	0.106647687042293
SEA11020038	Euro-American	sense_ctpB_214_to_stop	0
SEA11020057	Euro-American	sense_ctpB_214_to_stop	0
SEA11020068	Euro-American	sense_ctpB_214_to_stop	2.46111989983636
SEA11020092	Euro-American	sense_ctpB_214_to_stop	0
SEA11278	Lineage 7	sense_ctpB_214_to_stop	2.46111989983636
SEA12126	Indo-Oceanic	sense_ctpB_214_to_stop	2.46111989983636
SEA12202	Indo-Oceanic	sense_ctpB_214_to_stop	2.46111989983636
SEA12334	Indo-Oceanic	sense_ctpB_214_to_stop	2.46111989983636
SEA13111	Indo-Oceanic	sense_ctpB_214_to_stop	2.46111989983636
SEA14117	East-Asian	sense_ctpB_214_to_stop	2.46111989983636
SEA14333	Indo-Oceanic	sense_ctpB_214_to_stop	2.46111989983636
SEA15228	Indo-Oceanic	sense_ctpB_214_to_stop	2.46111989983636
SEA15229	Indo-Oceanic	sense_ctpB_214_to_stop	2.46111989983636
SEA15230	Indo-Oceanic	sense_ctpB_214_to_stop	2.46111989983636
SEA17020023	Indo-Oceanic	sense_ctpB_214_to_stop	2.46111989983636
SEA17020024	Indo-Oceanic	sense_ctpB_214_to_stop	2.46111989983636
SEA17020028	East-Asian	sense_ctpB_214_to_stop	2.46111989983636
SEA17020030	Euro-American	sense_ctpB_214_to_stop	2.31434679693236
1-0006	East-Asian	antisense_ctpB_135_from_start	2.46111989983636
1-0009	East-Asian	antisense_ctpB_135_from_start	2.46111989983636
1-0013	East-Asian	antisense_ctpB_135_from_start	0.208043331966955
1-0017	East-Asian	antisense_ctpB_135_from_start	2.37396123607
1-0021	East-African-Indian	antisense_ctpB_135_from_start	0
1-0028	East-Asian	antisense_ctpB_135_from_start	2.46111989983636
1-0030	Indo-Oceanic	antisense_ctpB_135_from_start	2.46111989983636
1-0031	East-Asian	antisense_ctpB_135_from_start	2.45801468047757
1-0036	Euro-American	antisense_ctpB_135_from_start	2.46111989983636
1-0039	East-Asian	antisense_ctpB_135_from_start	2.46111989983636
1-0044	Euro-American	antisense_ctpB_135_from_start	0
1-0045	East-Asian	antisense_ctpB_135_from_start	2.46111989983636
1-0047	East-African-Indian	antisense_ctpB_135_from_start	0
1-0054	East-Asian	antisense_ctpB_135_from_start	2.46111989983636
1-0056	East-Asian	antisense_ctpB_135_from_start	2.46111989983636
1-0061	Indo-Oceanic	antisense_ctpB_135_from_start	2.32467014836115
1-0064	East-Asian	antisense_ctpB_135_from_start	2.46111989983636
1-0066	East-Asian	antisense_ctpB_135_from_start	2.46111989983636
1-0069	East-Asian	antisense_ctpB_135_from_start	2.46111989983636
1-0071	East-Asian	antisense_ctpB_135_from_start	2.43358887933709
1-0084	East-Asian	antisense_ctpB_135_from_start	2.46111989983636
1-0102	East-Asian	antisense_ctpB_135_from_start	2.32363034022728
1-0107	East-African-Indian	antisense_ctpB_135_from_start	0.298791258924286
1-0110	East-Asian	antisense_ctpB_135_from_start	0.239350136385304
1-0112	East-Asian	antisense_ctpB_135_from_start	2.37132393222342
1-0116	East-Asian	antisense_ctpB_135_from_start	2.46111989983636
1-0123	East-Asian	antisense_ctpB_135_from_start	2.46111989983636
1-0137	East-Asian	antisense_ctpB_135_from_start	2.46111989983636
1-0149	East-Asian	antisense_ctpB_135_from_start	2.46111989983636
1-0150	East-Asian	antisense_ctpB_135_from_start	2.46111989983636
1-0153	East-Asian	antisense_ctpB_135_from_start	2.46111989983636
1-0156	Euro-American	antisense_ctpB_135_from_start	0.863872105468233
2-0013	East-Asian	antisense_ctpB_135_from_start	2.46111989983636
2-0021	Euro-American	antisense_ctpB_135_from_start	2.46111989983636
2-0022	Euro-American	antisense_ctpB_135_from_start	2.46111989983636
2-0023	Euro-American	antisense_ctpB_135_from_start	2.46111989983636
2-0028	Euro-American	antisense_ctpB_135_from_start	2.46111989983636
2-0029	Euro-American	antisense_ctpB_135_from_start	2.46111989983636
2-0034	East-Asian	antisense_ctpB_135_from_start	2.46111989983636
2-0043-unknown	Euro-American	antisense_ctpB_135_from_start	2.46111989983636
2-0046	Euro-American	antisense_ctpB_135_from_start	2.46111989983636
2-0052	East-Asian	antisense_ctpB_135_from_start	2.46111989983636
2-0068	East-Asian	antisense_ctpB_135_from_start	2.46111989983636
2-0111	Euro-American	antisense_ctpB_135_from_start	2.46111989983636
3-0059	Euro-American	antisense_ctpB_135_from_start	0.266135918676161
3-0090	Indo-Oceanic	antisense_ctpB_135_from_start	2.46111989983636
3-0096	Indo-Oceanic	antisense_ctpB_135_from_start	2.46111989983636
3-0124	Indo-Oceanic	antisense_ctpB_135_from_start	2.46111989983636
4-0012	Euro-American	antisense_ctpB_135_from_start	2.46111989983636
4-0062	East-Asian	antisense_ctpB_135_from_start	2.39177082437952
4-0073	Euro-American	antisense_ctpB_135_from_start	0.576028311329698
4-0077	East-Asian	antisense_ctpB_135_from_start	2.46111989983636
4-0087	Euro-American	antisense_ctpB_135_from_start	2.46111989983636
4-0096	East-Asian	antisense_ctpB_135_from_start	2.46111989983636
N0054	East-African-Indian	antisense_ctpB_135_from_start	0
N0091	M. africanum	antisense_ctpB_135_from_start	2.46111989983636
N0153	Indo-Oceanic	antisense_ctpB_135_from_start	2.46111989983636
N0157	Indo-Oceanic	antisense_ctpB_135_from_start	2.46111989983636
N1063	M. africanum	antisense_ctpB_135_from_start	2.46111989983636
N1176	M. africanum	antisense_ctpB_135_from_start	2.46111989983636
N1216	Euro-American	antisense_ctpB_135_from_start	0.114489078881761
SEA00042	Euro-American	antisense_ctpB_135_from_start	0
SEA06535	Euro-American	antisense_ctpB_135_from_start	2.46111989983636
SEA07010354	East-African-Indian	antisense_ctpB_135_from_start	0
SEA07020250	Euro-American	antisense_ctpB_135_from_start	0.707693248589764
SEA08151	Indo-Oceanic	antisense_ctpB_135_from_start	2.46111989983636
SEA09020048	Euro-American	antisense_ctpB_135_from_start	0.0799245072062796
SEA09167	Euro-American	antisense_ctpB_135_from_start	0.0211718508631083
SEA11020038	Euro-American	antisense_ctpB_135_from_start	0
SEA11020057	Euro-American	antisense_ctpB_135_from_start	0.367074059902131
SEA11020068	Euro-American	antisense_ctpB_135_from_start	2.46111989983636
SEA11020092	Euro-American	antisense_ctpB_135_from_start	0
SEA11278	Lineage 7	antisense_ctpB_135_from_start	2.22251266474248
SEA12126	Indo-Oceanic	antisense_ctpB_135_from_start	2.46111989983636
SEA12202	Indo-Oceanic	antisense_ctpB_135_from_start	2.46111989983636
SEA12334	Indo-Oceanic	antisense_ctpB_135_from_start	2.46111989983636
SEA13111	Indo-Oceanic	antisense_ctpB_135_from_start	2.46111989983636
SEA14117	East-Asian	antisense_ctpB_135_from_start	2.46111989983636
SEA14333	Indo-Oceanic	antisense_ctpB_135_from_start	2.46111989983636
SEA15228	Indo-Oceanic	antisense_ctpB_135_from_start	2.46111989983636
SEA15229	Indo-Oceanic	antisense_ctpB_135_from_start	2.46111989983636
SEA15230	Indo-Oceanic	antisense_ctpB_135_from_start	2.46111989983636
SEA17020023	Indo-Oceanic	antisense_ctpB_135_from_start	2.46111989983636
SEA17020024	Indo-Oceanic	antisense_ctpB_135_from_start	2.46111989983636
SEA17020028	East-Asian	antisense_ctpB_135_from_start	2.46111989983636
SEA17020030	Euro-American	antisense_ctpB_135_from_start	2.46111989983636
1-0006	East-Asian	sense_ctpB_128_from_start	2.46111989983636
1-0009	East-Asian	sense_ctpB_128_from_start	2.46111989983636
1-0013	East-Asian	sense_ctpB_128_from_start	0
1-0017	East-Asian	sense_ctpB_128_from_start	2.46111989983636
1-0021	East-African-Indian	sense_ctpB_128_from_start	0.659083321320702
1-0028	East-Asian	sense_ctpB_128_from_start	2.35637045787203
1-0030	Indo-Oceanic	sense_ctpB_128_from_start	2.46111989983636
1-0031	East-Asian	sense_ctpB_128_from_start	2.46111989983636
1-0036	Euro-American	sense_ctpB_128_from_start	2.46111989983636
1-0039	East-Asian	sense_ctpB_128_from_start	2.46111989983636
1-0044	Euro-American	sense_ctpB_128_from_start	0.176795542271402
1-0045	East-Asian	sense_ctpB_128_from_start	2.30493284075024
1-0047	East-African-Indian	sense_ctpB_128_from_start	0
1-0054	East-Asian	sense_ctpB_128_from_start	2.46111989983636
1-0056	East-Asian	sense_ctpB_128_from_start	2.46111989983636
1-0061	Indo-Oceanic	sense_ctpB_128_from_start	2.4527690449124
1-0064	East-Asian	sense_ctpB_128_from_start	2.46111989983636
1-0066	East-Asian	sense_ctpB_128_from_start	2.46111989983636
1-0069	East-Asian	sense_ctpB_128_from_start	2.46111989983636
1-0071	East-Asian	sense_ctpB_128_from_start	2.46111989983636
1-0084	East-Asian	sense_ctpB_128_from_start	2.46111989983636
1-0102	East-Asian	sense_ctpB_128_from_start	2.46111989983636
1-0107	East-African-Indian	sense_ctpB_128_from_start	0.267055570587832
1-0110	East-Asian	sense_ctpB_128_from_start	0.193211598206004
1-0112	East-Asian	sense_ctpB_128_from_start	2.46111989983636
1-0116	East-Asian	sense_ctpB_128_from_start	2.46111989983636
1-0123	East-Asian	sense_ctpB_128_from_start	2.46111989983636
1-0137	East-Asian	sense_ctpB_128_from_start	2.36969866408595
1-0149	East-Asian	sense_ctpB_128_from_start	2.46111989983636
1-0150	East-Asian	sense_ctpB_128_from_start	2.46111989983636
1-0153	East-Asian	sense_ctpB_128_from_start	2.46111989983636
1-0156	Euro-American	sense_ctpB_128_from_start	0.263284595978203
2-0013	East-Asian	sense_ctpB_128_from_start	2.46111989983636
2-0021	Euro-American	sense_ctpB_128_from_start	2.46111989983636
2-0022	Euro-American	sense_ctpB_128_from_start	2.46111989983636
2-0023	Euro-American	sense_ctpB_128_from_start	2.46111989983636
2-0028	Euro-American	sense_ctpB_128_from_start	2.46111989983636
2-0029	Euro-American	sense_ctpB_128_from_start	2.46111989983636
2-0034	East-Asian	sense_ctpB_128_from_start	2.46111989983636
2-0043-unknown	Euro-American	sense_ctpB_128_from_start	2.33708526357852
2-0046	Euro-American	sense_ctpB_128_from_start	2.28377737797748
2-0052	East-Asian	sense_ctpB_128_from_start	2.46111989983636
2-0068	East-Asian	sense_ctpB_128_from_start	2.26423311115722
2-0111	Euro-American	sense_ctpB_128_from_start	2.46111989983636
3-0059	Euro-American	sense_ctpB_128_from_start	0.439346104047838
3-0090	Indo-Oceanic	sense_ctpB_128_from_start	2.46111989983636
3-0096	Indo-Oceanic	sense_ctpB_128_from_start	2.41598804059404
3-0124	Indo-Oceanic	sense_ctpB_128_from_start	2.46111989983636
4-0012	Euro-American	sense_ctpB_128_from_start	2.46111989983636
4-0062	East-Asian	sense_ctpB_128_from_start	2.34900850474871
4-0073	Euro-American	sense_ctpB_128_from_start	0.267183693296247
4-0077	East-Asian	sense_ctpB_128_from_start	2.46111989983636
4-0087	Euro-American	sense_ctpB_128_from_start	2.46111989983636
4-0096	East-Asian	sense_ctpB_128_from_start	2.46111989983636
N0054	East-African-Indian	sense_ctpB_128_from_start	0
N0091	M. africanum	sense_ctpB_128_from_start	2.46111989983636
N0153	Indo-Oceanic	sense_ctpB_128_from_start	2.46111989983636
N0157	Indo-Oceanic	sense_ctpB_128_from_start	2.46111989983636
N1063	M. africanum	sense_ctpB_128_from_start	2.46111989983636
N1176	M. africanum	sense_ctpB_128_from_start	2.46111989983636
N1216	Euro-American	sense_ctpB_128_from_start	0.113148906894178
SEA00042	Euro-American	sense_ctpB_128_from_start	0.407184195579629
SEA06535	Euro-American	sense_ctpB_128_from_start	2.46111989983636
SEA07010354	East-African-Indian	sense_ctpB_128_from_start	0.341179093157857
SEA07020250	Euro-American	sense_ctpB_128_from_start	0.0325183224443106
SEA08151	Indo-Oceanic	sense_ctpB_128_from_start	2.46111989983636
SEA09020048	Euro-American	sense_ctpB_128_from_start	0.404629686764216
SEA09167	Euro-American	sense_ctpB_128_from_start	0.132692295326681
SEA11020038	Euro-American	sense_ctpB_128_from_start	0.243279177821954
SEA11020057	Euro-American	sense_ctpB_128_from_start	0.25981309324199
SEA11020068	Euro-American	sense_ctpB_128_from_start	2.1004115365083
SEA11020092	Euro-American	sense_ctpB_128_from_start	0.0665895543322271
SEA11278	Lineage 7	sense_ctpB_128_from_start	2.46111989983636
SEA12126	Indo-Oceanic	sense_ctpB_128_from_start	2.46111989983636
SEA12202	Indo-Oceanic	sense_ctpB_128_from_start	2.46111989983636
SEA12334	Indo-Oceanic	sense_ctpB_128_from_start	2.46111989983636
SEA13111	Indo-Oceanic	sense_ctpB_128_from_start	2.46111989983636
SEA14117	East-Asian	sense_ctpB_128_from_start	2.46111989983636
SEA14333	Indo-Oceanic	sense_ctpB_128_from_start	2.40228429115722
SEA15228	Indo-Oceanic	sense_ctpB_128_from_start	2.46111989983636
SEA15229	Indo-Oceanic	sense_ctpB_128_from_start	2.46111989983636
SEA15230	Indo-Oceanic	sense_ctpB_128_from_start	2.46111989983636
SEA17020023	Indo-Oceanic	sense_ctpB_128_from_start	2.46111989983636
SEA17020024	Indo-Oceanic	sense_ctpB_128_from_start	2.46111989983636
SEA17020028	East-Asian	sense_ctpB_128_from_start	2.46111989983636
SEA17020030	Euro-American	sense_ctpB_128_from_start	2.46111989983636
1-0006	East-Asian	sense_Rv0106_206_to_stop	2.46111989983636
1-0009	East-Asian	sense_Rv0106_206_to_stop	2.46111989983636
1-0013	East-Asian	sense_Rv0106_206_to_stop	0.0568720027656938
1-0017	East-Asian	sense_Rv0106_206_to_stop	2.38943339903471
1-0021	East-African-Indian	sense_Rv0106_206_to_stop	0
1-0028	East-Asian	sense_Rv0106_206_to_stop	2.46111989983636
1-0030	Indo-Oceanic	sense_Rv0106_206_to_stop	2.46111989983636
1-0031	East-Asian	sense_Rv0106_206_to_stop	2.46111989983636
1-0036	Euro-American	sense_Rv0106_206_to_stop	2.46111989983636
1-0039	East-Asian	sense_Rv0106_206_to_stop	2.34852544326057
1-0044	Euro-American	sense_Rv0106_206_to_stop	0
1-0045	East-Asian	sense_Rv0106_206_to_stop	2.46111989983636
1-0047	East-African-Indian	sense_Rv0106_206_to_stop	0.109379779051608
1-0054	East-Asian	sense_Rv0106_206_to_stop	2.46111989983636
1-0056	East-Asian	sense_Rv0106_206_to_stop	2.46111989983636
1-0061	Indo-Oceanic	sense_Rv0106_206_to_stop	2.46111989983636
1-0064	East-Asian	sense_Rv0106_206_to_stop	2.46111989983636
1-0066	East-Asian	sense_Rv0106_206_to_stop	2.46111989983636
1-0069	East-Asian	sense_Rv0106_206_to_stop	2.46111989983636
1-0071	East-Asian	sense_Rv0106_206_to_stop	2.46111989983636
1-0084	East-Asian	sense_Rv0106_206_to_stop	2.46111989983636
1-0102	East-Asian	sense_Rv0106_206_to_stop	2.46111989983636
1-0107	East-African-Indian	sense_Rv0106_206_to_stop	0
1-0110	East-Asian	sense_Rv0106_206_to_stop	0
1-0112	East-Asian	sense_Rv0106_206_to_stop	2.46111989983636
1-0116	East-Asian	sense_Rv0106_206_to_stop	2.35818330661741
1-0123	East-Asian	sense_Rv0106_206_to_stop	2.38712549438243
1-0137	East-Asian	sense_Rv0106_206_to_stop	2.46111989983636
1-0149	East-Asian	sense_Rv0106_206_to_stop	2.45561805887993
1-0150	East-Asian	sense_Rv0106_206_to_stop	2.46111989983636
1-0153	East-Asian	sense_Rv0106_206_to_stop	2.46111989983636
1-0156	Euro-American	sense_Rv0106_206_to_stop	0
2-0013	East-Asian	sense_Rv0106_206_to_stop	2.46111989983636
2-0021	Euro-American	sense_Rv0106_206_to_stop	2.46111989983636
2-0022	Euro-American	sense_Rv0106_206_to_stop	2.36877958279507
2-0023	Euro-American	sense_Rv0106_206_to_stop	2.46111989983636
2-0028	Euro-American	sense_Rv0106_206_to_stop	2.46111989983636
2-0029	Euro-American	sense_Rv0106_206_to_stop	2.46111989983636
2-0034	East-Asian	sense_Rv0106_206_to_stop	2.46111989983636
2-0043-unknown	Euro-American	sense_Rv0106_206_to_stop	2.46111989983636
2-0046	Euro-American	sense_Rv0106_206_to_stop	2.41014654889427
2-0052	East-Asian	sense_Rv0106_206_to_stop	2.46111989983636
2-0068	East-Asian	sense_Rv0106_206_to_stop	2.46111989983636
2-0111	Euro-American	sense_Rv0106_206_to_stop	2.46111989983636
3-0059	Euro-American	sense_Rv0106_206_to_stop	0
3-0090	Indo-Oceanic	sense_Rv0106_206_to_stop	2.46111989983636
3-0096	Indo-Oceanic	sense_Rv0106_206_to_stop	2.46111989983636
3-0124	Indo-Oceanic	sense_Rv0106_206_to_stop	2.46111989983636
4-0012	Euro-American	sense_Rv0106_206_to_stop	2.46111989983636
4-0062	East-Asian	sense_Rv0106_206_to_stop	2.41351620479277
4-0073	Euro-American	sense_Rv0106_206_to_stop	0.147107241304496
4-0077	East-Asian	sense_Rv0106_206_to_stop	2.44076856340464
4-0087	Euro-American	sense_Rv0106_206_to_stop	2.46111989983636
4-0096	East-Asian	sense_Rv0106_206_to_stop	2.46111989983636
N0054	East-African-Indian	sense_Rv0106_206_to_stop	0
N0091	M. africanum	sense_Rv0106_206_to_stop	1.9637461442182
N0153	Indo-Oceanic	sense_Rv0106_206_to_stop	2.46111989983636
N0157	Indo-Oceanic	sense_Rv0106_206_to_stop	2.46111989983636
N1063	M. africanum	sense_Rv0106_206_to_stop	2.46111989983636
N1176	M. africanum	sense_Rv0106_206_to_stop	2.46111989983636
N1216	Euro-American	sense_Rv0106_206_to_stop	0.102382476025108
SEA00042	Euro-American	sense_Rv0106_206_to_stop	0
SEA06535	Euro-American	sense_Rv0106_206_to_stop	2.36825603253366
SEA07010354	East-African-Indian	sense_Rv0106_206_to_stop	0.232987732554074
SEA07020250	Euro-American	sense_Rv0106_206_to_stop	0.10035585501436
SEA08151	Indo-Oceanic	sense_Rv0106_206_to_stop	2.4450647162032
SEA09020048	Euro-American	sense_Rv0106_206_to_stop	0.126422969306171
SEA09167	Euro-American	sense_Rv0106_206_to_stop	0
SEA11020038	Euro-American	sense_Rv0106_206_to_stop	0.342387322834878
SEA11020057	Euro-American	sense_Rv0106_206_to_stop	0.199254260994307
SEA11020068	Euro-American	sense_Rv0106_206_to_stop	2.46111989983636
SEA11020092	Euro-American	sense_Rv0106_206_to_stop	0.198208521830305
SEA11278	Lineage 7	sense_Rv0106_206_to_stop	2.43121990818692
SEA12126	Indo-Oceanic	sense_Rv0106_206_to_stop	2.46111989983636
SEA12202	Indo-Oceanic	sense_Rv0106_206_to_stop	2.46111989983636
SEA12334	Indo-Oceanic	sense_Rv0106_206_to_stop	2.46111989983636
SEA13111	Indo-Oceanic	sense_Rv0106_206_to_stop	2.46111989983636
SEA14117	East-Asian	sense_Rv0106_206_to_stop	2.46111989983636
SEA14333	Indo-Oceanic	sense_Rv0106_206_to_stop	2.46111989983636
SEA15228	Indo-Oceanic	sense_Rv0106_206_to_stop	2.46111989983636
SEA15229	Indo-Oceanic	sense_Rv0106_206_to_stop	2.46111989983636
SEA15230	Indo-Oceanic	sense_Rv0106_206_to_stop	2.46111989983636
SEA17020023	Indo-Oceanic	sense_Rv0106_206_to_stop	2.28952371595364
SEA17020024	Indo-Oceanic	sense_Rv0106_206_to_stop	2.28078363618484
SEA17020028	East-Asian	sense_Rv0106_206_to_stop	2.21424782317057
SEA17020030	Euro-American	sense_Rv0106_206_to_stop	2.46111989983636
1-0006	East-Asian	antisense_Rv0106_199_to_stop	2.46111989983636
1-0009	East-Asian	antisense_Rv0106_199_to_stop	2.46111989983636
1-0013	East-Asian	antisense_Rv0106_199_to_stop	0.0582572117447851
1-0017	East-Asian	antisense_Rv0106_199_to_stop	2.26502131889982
1-0021	East-African-Indian	antisense_Rv0106_199_to_stop	0
1-0028	East-Asian	antisense_Rv0106_199_to_stop	2.46111989983636
1-0030	Indo-Oceanic	antisense_Rv0106_199_to_stop	2.46111989983636
1-0031	East-Asian	antisense_Rv0106_199_to_stop	2.32724175154598
1-0036	Euro-American	antisense_Rv0106_199_to_stop	2.28161607411031
1-0039	East-Asian	antisense_Rv0106_199_to_stop	2.09555938742965
1-0044	Euro-American	antisense_Rv0106_199_to_stop	0
1-0045	East-Asian	antisense_Rv0106_199_to_stop	2.46111989983636
1-0047	East-African-Indian	antisense_Rv0106_199_to_stop	0.0954405880937344
1-0054	East-Asian	antisense_Rv0106_199_to_stop	2.46111989983636
1-0056	East-Asian	antisense_Rv0106_199_to_stop	2.46111989983636
1-0061	Indo-Oceanic	antisense_Rv0106_199_to_stop	2.46111989983636
1-0064	East-Asian	antisense_Rv0106_199_to_stop	2.44275864306113
1-0066	East-Asian	antisense_Rv0106_199_to_stop	2.46111989983636
1-0069	East-Asian	antisense_Rv0106_199_to_stop	1.95316677452347
1-0071	East-Asian	antisense_Rv0106_199_to_stop	2.46111989983636
1-0084	East-Asian	antisense_Rv0106_199_to_stop	2.21534991068529
1-0102	East-Asian	antisense_Rv0106_199_to_stop	2.46111989983636
1-0107	East-African-Indian	antisense_Rv0106_199_to_stop	0.339265556428837
1-0110	East-Asian	antisense_Rv0106_199_to_stop	0
1-0112	East-Asian	antisense_Rv0106_199_to_stop	2.46111989983636
1-0116	East-Asian	antisense_Rv0106_199_to_stop	2.16789881013023
1-0123	East-Asian	antisense_Rv0106_199_to_stop	2.46111989983636
1-0137	East-Asian	antisense_Rv0106_199_to_stop	2.33066456640435
1-0149	East-Asian	antisense_Rv0106_199_to_stop	2.46111989983636
1-0150	East-Asian	antisense_Rv0106_199_to_stop	2.46111989983636
1-0153	East-Asian	antisense_Rv0106_199_to_stop	2.46111989983636
1-0156	Euro-American	antisense_Rv0106_199_to_stop	0
2-0013	East-Asian	antisense_Rv0106_199_to_stop	2.46111989983636
2-0021	Euro-American	antisense_Rv0106_199_to_stop	2.31716049291593
2-0022	Euro-American	antisense_Rv0106_199_to_stop	1.88997405477655
2-0023	Euro-American	antisense_Rv0106_199_to_stop	2.46111989983636
2-0028	Euro-American	antisense_Rv0106_199_to_stop	2.46111989983636
2-0029	Euro-American	antisense_Rv0106_199_to_stop	2.46111989983636
2-0034	East-Asian	antisense_Rv0106_199_to_stop	2.46111989983636
2-0043-unknown	Euro-American	antisense_Rv0106_199_to_stop	2.40200872281034
2-0046	Euro-American	antisense_Rv0106_199_to_stop	2.46111989983636
2-0052	East-Asian	antisense_Rv0106_199_to_stop	2.46111989983636
2-0068	East-Asian	antisense_Rv0106_199_to_stop	2.46111989983636
2-0111	Euro-American	antisense_Rv0106_199_to_stop	2.46111989983636
3-0059	Euro-American	antisense_Rv0106_199_to_stop	0
3-0090	Indo-Oceanic	antisense_Rv0106_199_to_stop	2.46111989983636
3-0096	Indo-Oceanic	antisense_Rv0106_199_to_stop	2.32616226879508
3-0124	Indo-Oceanic	antisense_Rv0106_199_to_stop	2.40880436084724
4-0012	Euro-American	antisense_Rv0106_199_to_stop	2.46111989983636
4-0062	East-Asian	antisense_Rv0106_199_to_stop	2.46111989983636
4-0073	Euro-American	antisense_Rv0106_199_to_stop	0
4-0077	East-Asian	antisense_Rv0106_199_to_stop	2.46111989983636
4-0087	Euro-American	antisense_Rv0106_199_to_stop	2.46111989983636
4-0096	East-Asian	antisense_Rv0106_199_to_stop	2.4164805540032
N0054	East-African-Indian	antisense_Rv0106_199_to_stop	0.0970775567258562
N0091	M. africanum	antisense_Rv0106_199_to_stop	1.81566701072895
N0153	Indo-Oceanic	antisense_Rv0106_199_to_stop	2.35023307021547
N0157	Indo-Oceanic	antisense_Rv0106_199_to_stop	2.46111989983636
N1063	M. africanum	antisense_Rv0106_199_to_stop	2.46111989983636
N1176	M. africanum	antisense_Rv0106_199_to_stop	2.46111989983636
N1216	Euro-American	antisense_Rv0106_199_to_stop	0.266893981281056
SEA00042	Euro-American	antisense_Rv0106_199_to_stop	0.345048968900888
SEA06535	Euro-American	antisense_Rv0106_199_to_stop	2.41185727797791
SEA07010354	East-African-Indian	antisense_Rv0106_199_to_stop	0.235538918083407
SEA07020250	Euro-American	antisense_Rv0106_199_to_stop	0
SEA08151	Indo-Oceanic	antisense_Rv0106_199_to_stop	2.46111989983636
SEA09020048	Euro-American	antisense_Rv0106_199_to_stop	0.560179665931604
SEA09167	Euro-American	antisense_Rv0106_199_to_stop	0.296870102717834
SEA11020038	Euro-American	antisense_Rv0106_199_to_stop	0
SEA11020057	Euro-American	antisense_Rv0106_199_to_stop	0.133401713699681
SEA11020068	Euro-American	antisense_Rv0106_199_to_stop	2.46111989983636
SEA11020092	Euro-American	antisense_Rv0106_199_to_stop	0.135268919903151
SEA11278	Lineage 7	antisense_Rv0106_199_to_stop	2.34597734134032
SEA12126	Indo-Oceanic	antisense_Rv0106_199_to_stop	2.46111989983636
SEA12202	Indo-Oceanic	antisense_Rv0106_199_to_stop	2.46111989983636
SEA12334	Indo-Oceanic	antisense_Rv0106_199_to_stop	2.46111989983636
SEA13111	Indo-Oceanic	antisense_Rv0106_199_to_stop	2.33417884356112
SEA14117	East-Asian	antisense_Rv0106_199_to_stop	2.46111989983636
SEA14333	Indo-Oceanic	antisense_Rv0106_199_to_stop	2.46111989983636
SEA15228	Indo-Oceanic	antisense_Rv0106_199_to_stop	2.46111989983636
SEA15229	Indo-Oceanic	antisense_Rv0106_199_to_stop	2.30838537421622
SEA15230	Indo-Oceanic	antisense_Rv0106_199_to_stop	2.46111989983636
SEA17020023	Indo-Oceanic	antisense_Rv0106_199_to_stop	2.3845289823808
SEA17020024	Indo-Oceanic	antisense_Rv0106_199_to_stop	2.46111989983636
SEA17020028	East-Asian	antisense_Rv0106_199_to_stop	2.03071089699693
SEA17020030	Euro-American	antisense_Rv0106_199_to_stop	2.46111989983636
1-0006	East-Asian	sense_gca_460_from_start	2.42178271869483
1-0009	East-Asian	sense_gca_460_from_start	1.45351842983767
1-0013	East-Asian	sense_gca_460_from_start	0
1-0017	East-Asian	sense_gca_460_from_start	1.73026412710685
1-0021	East-African-Indian	sense_gca_460_from_start	0
1-0028	East-Asian	sense_gca_460_from_start	2.44464331723103
1-0030	Indo-Oceanic	sense_gca_460_from_start	2.23566684984144
1-0031	East-Asian	sense_gca_460_from_start	2.34501166777135
1-0036	Euro-American	sense_gca_460_from_start	2.19547754886585
1-0039	East-Asian	sense_gca_460_from_start	0.0186453498587801
1-0044	Euro-American	sense_gca_460_from_start	0.345249156497046
1-0045	East-Asian	sense_gca_460_from_start	2.08833886145386
1-0047	East-African-Indian	sense_gca_460_from_start	0
1-0054	East-Asian	sense_gca_460_from_start	2.34756546135742
1-0056	East-Asian	sense_gca_460_from_start	2.37023206228202
1-0061	Indo-Oceanic	sense_gca_460_from_start	1.71053661700221
1-0064	East-Asian	sense_gca_460_from_start	2.06482585639216
1-0066	East-Asian	sense_gca_460_from_start	1.88956350164939
1-0069	East-Asian	sense_gca_460_from_start	0.654153071584109
1-0071	East-Asian	sense_gca_460_from_start	0.970679488728275
1-0084	East-Asian	sense_gca_460_from_start	2.12456732806828
1-0102	East-Asian	sense_gca_460_from_start	2.46111989983636
1-0107	East-African-Indian	sense_gca_460_from_start	0
1-0110	East-Asian	sense_gca_460_from_start	0.0760589711901705
1-0112	East-Asian	sense_gca_460_from_start	1.8090653602687
1-0116	East-Asian	sense_gca_460_from_start	2.46111989983636
1-0123	East-Asian	sense_gca_460_from_start	2.08976446047565
1-0137	East-Asian	sense_gca_460_from_start	0.657320948966164
1-0149	East-Asian	sense_gca_460_from_start	2.46111989983636
1-0150	East-Asian	sense_gca_460_from_start	0.265481086987541
1-0153	East-Asian	sense_gca_460_from_start	0.656600270825562
1-0156	Euro-American	sense_gca_460_from_start	0.43698666845953
2-0013	East-Asian	sense_gca_460_from_start	2.17545538636541
2-0021	Euro-American	sense_gca_460_from_start	0.449069259436655
2-0022	Euro-American	sense_gca_460_from_start	1.77602357235405
2-0023	Euro-American	sense_gca_460_from_start	1.62223710833496
2-0028	Euro-American	sense_gca_460_from_start	1.66071753162735
2-0029	Euro-American	sense_gca_460_from_start	2.00453148446387
2-0034	East-Asian	sense_gca_460_from_start	1.62005912148256
2-0043-unknown	Euro-American	sense_gca_460_from_start	1.13410469740334
2-0046	Euro-American	sense_gca_460_from_start	1.11448113882051
2-0052	East-Asian	sense_gca_460_from_start	2.16335494817531
2-0068	East-Asian	sense_gca_460_from_start	0.227448963240886
2-0111	Euro-American	sense_gca_460_from_start	2.15165465807214
3-0059	Euro-American	sense_gca_460_from_start	0
3-0090	Indo-Oceanic	sense_gca_460_from_start	1.37090119477474
3-0096	Indo-Oceanic	sense_gca_460_from_start	2.31135577535859
3-0124	Indo-Oceanic	sense_gca_460_from_start	2.15469674257052
4-0062	East-Asian	sense_gca_460_from_start	2.16040863886427
4-0073	Euro-American	sense_gca_460_from_start	0
4-0077	East-Asian	sense_gca_460_from_start	2.14994741760765
4-0087	Euro-American	sense_gca_460_from_start	0.496912384105712
4-0096	East-Asian	sense_gca_460_from_start	1.72372875358545
N0054	East-African-Indian	sense_gca_460_from_start	0.0168303032714242
N0091	M. africanum	sense_gca_460_from_start	0.388852343673753
N0153	Indo-Oceanic	sense_gca_460_from_start	1.81759463807412
N0157	Indo-Oceanic	sense_gca_460_from_start	1.35017246493464
N1063	M. africanum	sense_gca_460_from_start	2.43638092640375
N1176	M. africanum	sense_gca_460_from_start	2.3792399224591
N1216	Euro-American	sense_gca_460_from_start	0.209104690169291
SEA00042	Euro-American	sense_gca_460_from_start	0.0178200901902162
SEA06535	Euro-American	sense_gca_460_from_start	0
SEA07010354	East-African-Indian	sense_gca_460_from_start	0.290553020087889
SEA07020250	Euro-American	sense_gca_460_from_start	0
SEA08151	Indo-Oceanic	sense_gca_460_from_start	1.82546279963948
SEA09020048	Euro-American	sense_gca_460_from_start	0
SEA09167	Euro-American	sense_gca_460_from_start	0.143519325811037
SEA11020038	Euro-American	sense_gca_460_from_start	0
SEA11020057	Euro-American	sense_gca_460_from_start	0
SEA11020068	Euro-American	sense_gca_460_from_start	0.396515855937705
SEA11020092	Euro-American	sense_gca_460_from_start	0
SEA11278	Lineage 7	sense_gca_460_from_start	0.264547884539697
SEA12126	Indo-Oceanic	sense_gca_460_from_start	2.18940996510375
SEA12202	Indo-Oceanic	sense_gca_460_from_start	0.782157885987598
SEA12334	Indo-Oceanic	sense_gca_460_from_start	0.683533450562295
SEA13111	Indo-Oceanic	sense_gca_460_from_start	2.17956824055279
SEA14117	East-Asian	sense_gca_460_from_start	0.4612029645793
SEA14333	Indo-Oceanic	sense_gca_460_from_start	1.97078859373726
SEA15228	Indo-Oceanic	sense_gca_460_from_start	1.13236662483516
SEA15229	Indo-Oceanic	sense_gca_460_from_start	1.62226295889958
SEA15230	Indo-Oceanic	sense_gca_460_from_start	1.96966209186659
SEA17020023	Indo-Oceanic	sense_gca_460_from_start	0.922866679045689
SEA17020024	Indo-Oceanic	sense_gca_460_from_start	1.08077290855324
SEA17020028	East-Asian	sense_gca_460_from_start	0.406577798995101
SEA17020030	Euro-American	sense_gca_460_from_start	0
1-0006	East-Asian	antisense_gca_467_from_start	2.38237775142405
1-0009	East-Asian	antisense_gca_467_from_start	1.02083880439913
1-0013	East-Asian	antisense_gca_467_from_start	0.000343908302270165
1-0017	East-Asian	antisense_gca_467_from_start	1.37537467308018
1-0021	East-African-Indian	antisense_gca_467_from_start	0
1-0028	East-Asian	antisense_gca_467_from_start	2.02866662448051
1-0030	Indo-Oceanic	antisense_gca_467_from_start	2.07529163767667
1-0031	East-Asian	antisense_gca_467_from_start	1.93872975565282
1-0036	Euro-American	antisense_gca_467_from_start	1.81949529928222
1-0039	East-Asian	antisense_gca_467_from_start	0
1-0044	Euro-American	antisense_gca_467_from_start	0
1-0045	East-Asian	antisense_gca_467_from_start	1.53978538307516
1-0047	East-African-Indian	antisense_gca_467_from_start	0
1-0054	East-Asian	antisense_gca_467_from_start	2.05890524784814
1-0056	East-Asian	antisense_gca_467_from_start	2.46111989983636
1-0061	Indo-Oceanic	antisense_gca_467_from_start	1.46653795111208
1-0064	East-Asian	antisense_gca_467_from_start	1.82277518234584
1-0066	East-Asian	antisense_gca_467_from_start	1.57372702048891
1-0069	East-Asian	antisense_gca_467_from_start	0.55877502350685
1-0071	East-Asian	antisense_gca_467_from_start	0.834372394935691
1-0084	East-Asian	antisense_gca_467_from_start	1.81495696829236
1-0102	East-Asian	antisense_gca_467_from_start	1.98155337341844
1-0107	East-African-Indian	antisense_gca_467_from_start	0
1-0110	East-Asian	antisense_gca_467_from_start	0
1-0112	East-Asian	antisense_gca_467_from_start	1.12461389858841
1-0116	East-Asian	antisense_gca_467_from_start	2.06621419337306
1-0123	East-Asian	antisense_gca_467_from_start	1.79610341433072
1-0137	East-Asian	antisense_gca_467_from_start	0.537774742420874
1-0149	East-Asian	antisense_gca_467_from_start	1.97002395302194
1-0150	East-Asian	antisense_gca_467_from_start	0.627612723870504
1-0153	East-Asian	antisense_gca_467_from_start	0.284355754243008
1-0156	Euro-American	antisense_gca_467_from_start	0.413584775934432
2-0013	East-Asian	antisense_gca_467_from_start	1.6536042134872
2-0021	Euro-American	antisense_gca_467_from_start	0.655593053688656
2-0022	Euro-American	antisense_gca_467_from_start	1.61699027684147
2-0023	Euro-American	antisense_gca_467_from_start	1.7742886460654
2-0028	Euro-American	antisense_gca_467_from_start	1.81344246887551
2-0029	Euro-American	antisense_gca_467_from_start	1.63921010125098
2-0034	East-Asian	antisense_gca_467_from_start	1.00404423488335
2-0043-unknown	Euro-American	antisense_gca_467_from_start	0.465504823824677
2-0046	Euro-American	antisense_gca_467_from_start	1.00429822107009
2-0052	East-Asian	antisense_gca_467_from_start	2.19629606843768
2-0068	East-Asian	antisense_gca_467_from_start	0.135674769533224
2-0111	Euro-American	antisense_gca_467_from_start	1.8186476034949
[truncated: 44,425 more rows]
