# Supplementary material for: Drivers and sites of diversity in the DNA adenine methylomes of 93 Mycobacterium tuberculosis complex clinical isolates
Source: eLife. 2020 Oct 27;9:e58542. doi: 10.7554/eLife.58542 (PMC7591249; doi:10.7554/eLife.58542)
Supplement: Figure 4—source data 3. [file elife-58542-fig4-data3.csv]

Isolate	Lineage	RefLoci	logIPD_adj
1-0006	East-Asian	antisense_recF_22_from_start	2.8537464602995
1-0009	East-Asian	antisense_recF_22_from_start	2.8537464602995
1-0013	East-Asian	antisense_recF_22_from_start	2.8537464602995
1-0017	East-Asian	antisense_recF_22_from_start	2.8537464602995
1-0021	East-African-Indian	antisense_recF_22_from_start	2.8537464602995
1-0028	East-Asian	antisense_recF_22_from_start	2.8537464602995
1-0030	Indo-Oceanic	antisense_recF_22_from_start	2.8537464602995
1-0031	East-Asian	antisense_recF_22_from_start	2.8537464602995
1-0036	Euro-American	antisense_recF_22_from_start	2.8537464602995
1-0039	East-Asian	antisense_recF_22_from_start	2.8537464602995
1-0044	Euro-American	antisense_recF_22_from_start	0
1-0045	East-Asian	antisense_recF_22_from_start	2.8537464602995
1-0047	East-African-Indian	antisense_recF_22_from_start	2.8537464602995
1-0054	East-Asian	antisense_recF_22_from_start	2.8537464602995
1-0056	East-Asian	antisense_recF_22_from_start	2.8537464602995
1-0061	Indo-Oceanic	antisense_recF_22_from_start	2.8537464602995
1-0064	East-Asian	antisense_recF_22_from_start	2.8537464602995
1-0066	East-Asian	antisense_recF_22_from_start	2.8537464602995
1-0069	East-Asian	antisense_recF_22_from_start	2.8537464602995
1-0071	East-Asian	antisense_recF_22_from_start	2.63002819556943
1-0084	East-Asian	antisense_recF_22_from_start	2.8537464602995
1-0102	East-Asian	antisense_recF_22_from_start	2.8537464602995
1-0107	East-African-Indian	antisense_recF_22_from_start	2.8537464602995
1-0110	East-Asian	antisense_recF_22_from_start	2.83872787414106
1-0112	East-Asian	antisense_recF_22_from_start	2.8537464602995
1-0116	East-Asian	antisense_recF_22_from_start	2.8537464602995
1-0123	East-Asian	antisense_recF_22_from_start	2.8537464602995
1-0137	East-Asian	antisense_recF_22_from_start	2.8537464602995
1-0149	East-Asian	antisense_recF_22_from_start	2.8537464602995
1-0150	East-Asian	antisense_recF_22_from_start	2.8537464602995
1-0153	East-Asian	antisense_recF_22_from_start	2.8537464602995
1-0156	Euro-American	antisense_recF_22_from_start	0
2-0013	East-Asian	antisense_recF_22_from_start	2.8537464602995
2-0021	Euro-American	antisense_recF_22_from_start	2.8537464602995
2-0022	Euro-American	antisense_recF_22_from_start	2.80171684603482
2-0023	Euro-American	antisense_recF_22_from_start	2.8537464602995
2-0028	Euro-American	antisense_recF_22_from_start	2.8537464602995
2-0029	Euro-American	antisense_recF_22_from_start	2.8537464602995
2-0034	East-Asian	antisense_recF_22_from_start	2.8537464602995
2-0043-unknown	Euro-American	antisense_recF_22_from_start	2.8537464602995
2-0046	Euro-American	antisense_recF_22_from_start	2.8537464602995
2-0052	East-Asian	antisense_recF_22_from_start	2.8537464602995
2-0068	East-Asian	antisense_recF_22_from_start	2.8537464602995
2-0111	Euro-American	antisense_recF_22_from_start	2.8537464602995
3-0059	Euro-American	antisense_recF_22_from_start	2.8537464602995
3-0090	Indo-Oceanic	antisense_recF_22_from_start	0.0044805400088798
3-0096	Indo-Oceanic	antisense_recF_22_from_start	2.8537464602995
3-0124	Indo-Oceanic	antisense_recF_22_from_start	2.8537464602995
4-0012	Euro-American	antisense_recF_22_from_start	2.8537464602995
4-0062	East-Asian	antisense_recF_22_from_start	2.8537464602995
4-0073	Euro-American	antisense_recF_22_from_start	2.8537464602995
4-0077	East-Asian	antisense_recF_22_from_start	2.8537464602995
4-0087	Euro-American	antisense_recF_22_from_start	2.70113290017871
4-0096	East-Asian	antisense_recF_22_from_start	2.8537464602995
N0054	East-African-Indian	antisense_recF_22_from_start	2.8537464602995
N0091	M. africanum	antisense_recF_22_from_start	2.8537464602995
N0153	Indo-Oceanic	antisense_recF_22_from_start	2.8537464602995
N0157	Indo-Oceanic	antisense_recF_22_from_start	0.25868730158773
N1063	M. africanum	antisense_recF_22_from_start	2.8537464602995
N1176	M. africanum	antisense_recF_22_from_start	2.8537464602995
N1216	Euro-American	antisense_recF_22_from_start	2.8537464602995
SEA00042	Euro-American	antisense_recF_22_from_start	2.8537464602995
SEA06535	Euro-American	antisense_recF_22_from_start	1.09466253013203
SEA07010354	East-African-Indian	antisense_recF_22_from_start	2.8537464602995
SEA07020250	Euro-American	antisense_recF_22_from_start	2.8537464602995
SEA08151	Indo-Oceanic	antisense_recF_22_from_start	2.8537464602995
SEA09020048	Euro-American	antisense_recF_22_from_start	2.8537464602995
SEA09167	Euro-American	antisense_recF_22_from_start	2.8537464602995
SEA11020038	Euro-American	antisense_recF_22_from_start	0.389499918672998
SEA11020057	Euro-American	antisense_recF_22_from_start	2.8537464602995
SEA11020068	Euro-American	antisense_recF_22_from_start	2.8537464602995
SEA11020092	Euro-American	antisense_recF_22_from_start	0.521969940970228
SEA11278	Lineage 7	antisense_recF_22_from_start	2.68285637131336
SEA12126	Indo-Oceanic	antisense_recF_22_from_start	2.8537464602995
SEA12202	Indo-Oceanic	antisense_recF_22_from_start	2.8537464602995
SEA12334	Indo-Oceanic	antisense_recF_22_from_start	2.8537464602995
SEA13111	Indo-Oceanic	antisense_recF_22_from_start	2.8537464602995
SEA14117	East-Asian	antisense_recF_22_from_start	2.8537464602995
SEA14333	Indo-Oceanic	antisense_recF_22_from_start	2.8537464602995
SEA15228	Indo-Oceanic	antisense_recF_22_from_start	2.8537464602995
SEA15229	Indo-Oceanic	antisense_recF_22_from_start	2.8537464602995
SEA15230	Indo-Oceanic	antisense_recF_22_from_start	2.8537464602995
SEA17020023	Indo-Oceanic	antisense_recF_22_from_start	0.10298744759389
SEA17020024	Indo-Oceanic	antisense_recF_22_from_start	0.339424673591313
SEA17020028	East-Asian	antisense_recF_22_from_start	2.8537464602995
SEA17020030	Euro-American	antisense_recF_22_from_start	2.8537464602995
1-0006	East-Asian	antisense_gyrA_580_from_start	2.1874481202871
1-0009	East-Asian	antisense_gyrA_580_from_start	2.8537464602995
1-0013	East-Asian	antisense_gyrA_580_from_start	2.61690560396861
1-0017	East-Asian	antisense_gyrA_580_from_start	2.83650059025735
1-0021	East-African-Indian	antisense_gyrA_580_from_start	2.36581392591156
1-0028	East-Asian	antisense_gyrA_580_from_start	2.77095872935933
1-0030	Indo-Oceanic	antisense_gyrA_580_from_start	2.82700289534718
1-0031	East-Asian	antisense_gyrA_580_from_start	2.83473358540258
1-0036	Euro-American	antisense_gyrA_580_from_start	2.8537464602995
1-0039	East-Asian	antisense_gyrA_580_from_start	2.69607107232721
1-0044	Euro-American	antisense_gyrA_580_from_start	0
1-0045	East-Asian	antisense_gyrA_580_from_start	2.70243385900357
1-0047	East-African-Indian	antisense_gyrA_580_from_start	2.41792884413777
1-0054	East-Asian	antisense_gyrA_580_from_start	2.49880636668531
1-0056	East-Asian	antisense_gyrA_580_from_start	2.80863945077035
1-0061	Indo-Oceanic	antisense_gyrA_580_from_start	2.37838977659111
1-0064	East-Asian	antisense_gyrA_580_from_start	2.65133996309796
1-0066	East-Asian	antisense_gyrA_580_from_start	2.49084762939539
1-0069	East-Asian	antisense_gyrA_580_from_start	2.8537464602995
1-0071	East-Asian	antisense_gyrA_580_from_start	2.8537464602995
1-0084	East-Asian	antisense_gyrA_580_from_start	2.68129753515589
1-0102	East-Asian	antisense_gyrA_580_from_start	2.68164875923579
1-0107	East-African-Indian	antisense_gyrA_580_from_start	2.42223304744642
1-0110	East-Asian	antisense_gyrA_580_from_start	2.81541980331503
1-0112	East-Asian	antisense_gyrA_580_from_start	2.8537464602995
1-0116	East-Asian	antisense_gyrA_580_from_start	2.8537464602995
1-0123	East-Asian	antisense_gyrA_580_from_start	2.56688200598119
1-0137	East-Asian	antisense_gyrA_580_from_start	2.7727981663861
1-0149	East-Asian	antisense_gyrA_580_from_start	2.8537464602995
1-0150	East-Asian	antisense_gyrA_580_from_start	2.39795445524175
1-0153	East-Asian	antisense_gyrA_580_from_start	2.8537464602995
1-0156	Euro-American	antisense_gyrA_580_from_start	0.232855236895062
2-0013	East-Asian	antisense_gyrA_580_from_start	2.41117403891421
2-0021	Euro-American	antisense_gyrA_580_from_start	2.67466134111563
2-0022	Euro-American	antisense_gyrA_580_from_start	2.67568259873149
2-0023	Euro-American	antisense_gyrA_580_from_start	2.83824836812579
2-0028	Euro-American	antisense_gyrA_580_from_start	2.49647853442855
2-0029	Euro-American	antisense_gyrA_580_from_start	2.68228570030753
2-0034	East-Asian	antisense_gyrA_580_from_start	2.60260029304303
2-0043-unknown	Euro-American	antisense_gyrA_580_from_start	2.65571919088006
2-0046	Euro-American	antisense_gyrA_580_from_start	2.66967174026324
2-0052	East-Asian	antisense_gyrA_580_from_start	2.8537464602995
2-0068	East-Asian	antisense_gyrA_580_from_start	2.8275683620954
2-0111	Euro-American	antisense_gyrA_580_from_start	2.8537464602995
3-0059	Euro-American	antisense_gyrA_580_from_start	2.47513703425543
3-0090	Indo-Oceanic	antisense_gyrA_580_from_start	0
3-0096	Indo-Oceanic	antisense_gyrA_580_from_start	2.8537464602995
3-0124	Indo-Oceanic	antisense_gyrA_580_from_start	2.8537464602995
4-0012	Euro-American	antisense_gyrA_580_from_start	2.83590011260098
4-0062	East-Asian	antisense_gyrA_580_from_start	2.8537464602995
4-0073	Euro-American	antisense_gyrA_580_from_start	2.57653372210414
4-0077	East-Asian	antisense_gyrA_580_from_start	2.8537464602995
4-0087	Euro-American	antisense_gyrA_580_from_start	2.66393259046028
4-0096	East-Asian	antisense_gyrA_580_from_start	2.8537464602995
N0054	East-African-Indian	antisense_gyrA_580_from_start	2.8537464602995
N0091	M. africanum	antisense_gyrA_580_from_start	2.73318132916614
N0153	Indo-Oceanic	antisense_gyrA_580_from_start	2.77781043054532
N0157	Indo-Oceanic	antisense_gyrA_580_from_start	0.0204670194555546
N1063	M. africanum	antisense_gyrA_580_from_start	2.8537464602995
N1176	M. africanum	antisense_gyrA_580_from_start	2.81437191491543
N1216	Euro-American	antisense_gyrA_580_from_start	2.8537464602995
SEA00042	Euro-American	antisense_gyrA_580_from_start	2.75013146788288
SEA06535	Euro-American	antisense_gyrA_580_from_start	1.17770369062912
SEA07010354	East-African-Indian	antisense_gyrA_580_from_start	2.8537464602995
SEA07020250	Euro-American	antisense_gyrA_580_from_start	2.8537464602995
SEA08151	Indo-Oceanic	antisense_gyrA_580_from_start	2.8537464602995
SEA09020048	Euro-American	antisense_gyrA_580_from_start	2.8537464602995
SEA09167	Euro-American	antisense_gyrA_580_from_start	2.8537464602995
SEA11020038	Euro-American	antisense_gyrA_580_from_start	0
SEA11020057	Euro-American	antisense_gyrA_580_from_start	2.81275291483194
SEA11020068	Euro-American	antisense_gyrA_580_from_start	2.20903360260708
SEA11020092	Euro-American	antisense_gyrA_580_from_start	0
SEA11278	Lineage 7	antisense_gyrA_580_from_start	2.8537464602995
SEA12126	Indo-Oceanic	antisense_gyrA_580_from_start	2.46742391967993
SEA12202	Indo-Oceanic	antisense_gyrA_580_from_start	2.65328211863981
SEA12334	Indo-Oceanic	antisense_gyrA_580_from_start	2.8537464602995
SEA13111	Indo-Oceanic	antisense_gyrA_580_from_start	2.8537464602995
SEA14117	East-Asian	antisense_gyrA_580_from_start	2.53033810214491
SEA14333	Indo-Oceanic	antisense_gyrA_580_from_start	2.56985184586754
SEA15228	Indo-Oceanic	antisense_gyrA_580_from_start	2.8537464602995
SEA15229	Indo-Oceanic	antisense_gyrA_580_from_start	2.8537464602995
SEA15230	Indo-Oceanic	antisense_gyrA_580_from_start	2.8537464602995
SEA17020028	East-Asian	antisense_gyrA_580_from_start	2.8537464602995
SEA17020030	Euro-American	antisense_gyrA_580_from_start	2.8537464602995
1-0006	East-Asian	antisense_pbpA_655_to_stop	2.8537464602995
1-0009	East-Asian	antisense_pbpA_655_to_stop	2.8537464602995
1-0013	East-Asian	antisense_pbpA_655_to_stop	2.69177544159236
1-0017	East-Asian	antisense_pbpA_655_to_stop	2.8537464602995
1-0021	East-African-Indian	antisense_pbpA_655_to_stop	2.6479312814496
1-0028	East-Asian	antisense_pbpA_655_to_stop	2.8537464602995
1-0030	Indo-Oceanic	antisense_pbpA_655_to_stop	2.74987496825607
1-0031	East-Asian	antisense_pbpA_655_to_stop	2.8537464602995
1-0036	Euro-American	antisense_pbpA_655_to_stop	2.8537464602995
1-0039	East-Asian	antisense_pbpA_655_to_stop	2.8537464602995
1-0044	Euro-American	antisense_pbpA_655_to_stop	0.0350503541917907
1-0045	East-Asian	antisense_pbpA_655_to_stop	2.8537464602995
1-0047	East-African-Indian	antisense_pbpA_655_to_stop	2.8537464602995
1-0054	East-Asian	antisense_pbpA_655_to_stop	2.8537464602995
1-0056	East-Asian	antisense_pbpA_655_to_stop	2.8537464602995
1-0061	Indo-Oceanic	antisense_pbpA_655_to_stop	2.84374188736329
1-0064	East-Asian	antisense_pbpA_655_to_stop	2.8537464602995
1-0066	East-Asian	antisense_pbpA_655_to_stop	2.8537464602995
1-0069	East-Asian	antisense_pbpA_655_to_stop	2.8537464602995
1-0071	East-Asian	antisense_pbpA_655_to_stop	2.8537464602995
1-0084	East-Asian	antisense_pbpA_655_to_stop	2.8537464602995
1-0102	East-Asian	antisense_pbpA_655_to_stop	2.79973731785313
1-0107	East-African-Indian	antisense_pbpA_655_to_stop	2.8537464602995
1-0110	East-Asian	antisense_pbpA_655_to_stop	2.8537464602995
1-0112	East-Asian	antisense_pbpA_655_to_stop	2.8537464602995
1-0116	East-Asian	antisense_pbpA_655_to_stop	2.8537464602995
1-0123	East-Asian	antisense_pbpA_655_to_stop	2.72460286783637
1-0137	East-Asian	antisense_pbpA_655_to_stop	2.8537464602995
1-0149	East-Asian	antisense_pbpA_655_to_stop	2.8537464602995
1-0150	East-Asian	antisense_pbpA_655_to_stop	2.8537464602995
1-0153	East-Asian	antisense_pbpA_655_to_stop	2.8537464602995
1-0156	Euro-American	antisense_pbpA_655_to_stop	0.440464440431047
2-0013	East-Asian	antisense_pbpA_655_to_stop	2.8537464602995
2-0021	Euro-American	antisense_pbpA_655_to_stop	2.74784317307161
2-0022	Euro-American	antisense_pbpA_655_to_stop	2.8537464602995
2-0023	Euro-American	antisense_pbpA_655_to_stop	2.61129557500375
2-0028	Euro-American	antisense_pbpA_655_to_stop	2.8537464602995
2-0029	Euro-American	antisense_pbpA_655_to_stop	2.8082514964583
2-0034	East-Asian	antisense_pbpA_655_to_stop	2.8537464602995
2-0043-unknown	Euro-American	antisense_pbpA_655_to_stop	2.8537464602995
2-0046	Euro-American	antisense_pbpA_655_to_stop	2.77878549408774
2-0052	East-Asian	antisense_pbpA_655_to_stop	2.70286166266607
2-0068	East-Asian	antisense_pbpA_655_to_stop	2.8425676765783
2-0111	Euro-American	antisense_pbpA_655_to_stop	2.8537464602995
3-0059	Euro-American	antisense_pbpA_655_to_stop	2.8537464602995
3-0090	Indo-Oceanic	antisense_pbpA_655_to_stop	0.340222872443334
3-0096	Indo-Oceanic	antisense_pbpA_655_to_stop	2.8537464602995
3-0124	Indo-Oceanic	antisense_pbpA_655_to_stop	2.8537464602995
4-0012	Euro-American	antisense_pbpA_655_to_stop	2.8537464602995
4-0062	East-Asian	antisense_pbpA_655_to_stop	2.8537464602995
4-0073	Euro-American	antisense_pbpA_655_to_stop	2.63617509431805
4-0077	East-Asian	antisense_pbpA_655_to_stop	2.8537464602995
4-0087	Euro-American	antisense_pbpA_655_to_stop	2.686321875733
4-0096	East-Asian	antisense_pbpA_655_to_stop	2.8537464602995
N0054	East-African-Indian	antisense_pbpA_655_to_stop	2.8537464602995
N0091	M. africanum	antisense_pbpA_655_to_stop	2.8537464602995
N0153	Indo-Oceanic	antisense_pbpA_655_to_stop	2.8537464602995
N0157	Indo-Oceanic	antisense_pbpA_655_to_stop	0.240868692524022
N1063	M. africanum	antisense_pbpA_655_to_stop	2.8537464602995
N1176	M. africanum	antisense_pbpA_655_to_stop	2.8537464602995
N1216	Euro-American	antisense_pbpA_655_to_stop	2.8537464602995
SEA00042	Euro-American	antisense_pbpA_655_to_stop	2.8537464602995
SEA06535	Euro-American	antisense_pbpA_655_to_stop	1.93615870776955
SEA07010354	East-African-Indian	antisense_pbpA_655_to_stop	2.8537464602995
SEA07020250	Euro-American	antisense_pbpA_655_to_stop	2.8537464602995
SEA08151	Indo-Oceanic	antisense_pbpA_655_to_stop	2.8537464602995
SEA09020048	Euro-American	antisense_pbpA_655_to_stop	2.8537464602995
SEA09167	Euro-American	antisense_pbpA_655_to_stop	2.8537464602995
SEA11020038	Euro-American	antisense_pbpA_655_to_stop	0.989448599318
SEA11020057	Euro-American	antisense_pbpA_655_to_stop	2.8537464602995
SEA11020068	Euro-American	antisense_pbpA_655_to_stop	2.8537464602995
SEA11020092	Euro-American	antisense_pbpA_655_to_stop	0
SEA11278	Lineage 7	antisense_pbpA_655_to_stop	2.8537464602995
SEA12126	Indo-Oceanic	antisense_pbpA_655_to_stop	2.8537464602995
SEA12202	Indo-Oceanic	antisense_pbpA_655_to_stop	2.80463088621605
SEA12334	Indo-Oceanic	antisense_pbpA_655_to_stop	2.8537464602995
SEA13111	Indo-Oceanic	antisense_pbpA_655_to_stop	2.8537464602995
SEA14117	East-Asian	antisense_pbpA_655_to_stop	2.8537464602995
SEA14333	Indo-Oceanic	antisense_pbpA_655_to_stop	2.70058878151869
SEA15228	Indo-Oceanic	antisense_pbpA_655_to_stop	2.8537464602995
SEA15229	Indo-Oceanic	antisense_pbpA_655_to_stop	2.8537464602995
SEA15230	Indo-Oceanic	antisense_pbpA_655_to_stop	2.8537464602995
SEA17020028	East-Asian	antisense_pbpA_655_to_stop	2.8537464602995
SEA17020030	Euro-American	antisense_pbpA_655_to_stop	2.8537464602995
1-0006	East-Asian	antisense_pbpA_100_from_start	2.8537464602995
1-0009	East-Asian	antisense_pbpA_100_from_start	2.8537464602995
1-0013	East-Asian	antisense_pbpA_100_from_start	2.8537464602995
1-0017	East-Asian	antisense_pbpA_100_from_start	2.8537464602995
1-0021	East-African-Indian	antisense_pbpA_100_from_start	2.8537464602995
1-0028	East-Asian	antisense_pbpA_100_from_start	2.8537464602995
1-0030	Indo-Oceanic	antisense_pbpA_100_from_start	2.8537464602995
1-0031	East-Asian	antisense_pbpA_100_from_start	2.8537464602995
1-0036	Euro-American	antisense_pbpA_100_from_start	2.8537464602995
1-0039	East-Asian	antisense_pbpA_100_from_start	2.8537464602995
1-0044	Euro-American	antisense_pbpA_100_from_start	0
1-0045	East-Asian	antisense_pbpA_100_from_start	2.8537464602995
1-0047	East-African-Indian	antisense_pbpA_100_from_start	2.8537464602995
1-0054	East-Asian	antisense_pbpA_100_from_start	2.8537464602995
1-0056	East-Asian	antisense_pbpA_100_from_start	2.8537464602995
1-0061	Indo-Oceanic	antisense_pbpA_100_from_start	2.8537464602995
1-0064	East-Asian	antisense_pbpA_100_from_start	2.8537464602995
1-0066	East-Asian	antisense_pbpA_100_from_start	2.8537464602995
1-0069	East-Asian	antisense_pbpA_100_from_start	2.83150716946973
1-0071	East-Asian	antisense_pbpA_100_from_start	2.8537464602995
1-0084	East-Asian	antisense_pbpA_100_from_start	2.8537464602995
1-0102	East-Asian	antisense_pbpA_100_from_start	2.8537464602995
1-0107	East-African-Indian	antisense_pbpA_100_from_start	2.8537464602995
1-0110	East-Asian	antisense_pbpA_100_from_start	2.8537464602995
1-0112	East-Asian	antisense_pbpA_100_from_start	2.8537464602995
1-0116	East-Asian	antisense_pbpA_100_from_start	2.8537464602995
1-0123	East-Asian	antisense_pbpA_100_from_start	2.8537464602995
1-0137	East-Asian	antisense_pbpA_100_from_start	2.8537464602995
1-0149	East-Asian	antisense_pbpA_100_from_start	2.8537464602995
1-0150	East-Asian	antisense_pbpA_100_from_start	2.8537464602995
1-0153	East-Asian	antisense_pbpA_100_from_start	2.8537464602995
1-0156	Euro-American	antisense_pbpA_100_from_start	0
2-0013	East-Asian	antisense_pbpA_100_from_start	2.8537464602995
2-0021	Euro-American	antisense_pbpA_100_from_start	2.8537464602995
2-0022	Euro-American	antisense_pbpA_100_from_start	2.8537464602995
2-0023	Euro-American	antisense_pbpA_100_from_start	2.8537464602995
2-0028	Euro-American	antisense_pbpA_100_from_start	2.8537464602995
2-0029	Euro-American	antisense_pbpA_100_from_start	2.8537464602995
2-0034	East-Asian	antisense_pbpA_100_from_start	2.8537464602995
2-0043-unknown	Euro-American	antisense_pbpA_100_from_start	2.8537464602995
2-0046	Euro-American	antisense_pbpA_100_from_start	2.69472122929926
2-0052	East-Asian	antisense_pbpA_100_from_start	2.8537464602995
2-0068	East-Asian	antisense_pbpA_100_from_start	2.8537464602995
2-0111	Euro-American	antisense_pbpA_100_from_start	2.8537464602995
3-0059	Euro-American	antisense_pbpA_100_from_start	2.8537464602995
3-0090	Indo-Oceanic	antisense_pbpA_100_from_start	0.105688789577945
3-0096	Indo-Oceanic	antisense_pbpA_100_from_start	2.8537464602995
3-0124	Indo-Oceanic	antisense_pbpA_100_from_start	2.8537464602995
4-0012	Euro-American	antisense_pbpA_100_from_start	2.8537464602995
4-0062	East-Asian	antisense_pbpA_100_from_start	2.8537464602995
4-0073	Euro-American	antisense_pbpA_100_from_start	2.8537464602995
4-0077	East-Asian	antisense_pbpA_100_from_start	2.8537464602995
4-0087	Euro-American	antisense_pbpA_100_from_start	2.8537464602995
4-0096	East-Asian	antisense_pbpA_100_from_start	2.8537464602995
N0054	East-African-Indian	antisense_pbpA_100_from_start	2.8537464602995
N0091	M. africanum	antisense_pbpA_100_from_start	2.8537464602995
N0153	Indo-Oceanic	antisense_pbpA_100_from_start	2.8537464602995
N0157	Indo-Oceanic	antisense_pbpA_100_from_start	0.31540704677396
N1063	M. africanum	antisense_pbpA_100_from_start	2.8537464602995
N1176	M. africanum	antisense_pbpA_100_from_start	2.8537464602995
N1216	Euro-American	antisense_pbpA_100_from_start	2.8537464602995
SEA00042	Euro-American	antisense_pbpA_100_from_start	2.8537464602995
SEA06535	Euro-American	antisense_pbpA_100_from_start	1.28878359987983
SEA07010354	East-African-Indian	antisense_pbpA_100_from_start	2.74663498539574
SEA07020250	Euro-American	antisense_pbpA_100_from_start	2.8537464602995
SEA08151	Indo-Oceanic	antisense_pbpA_100_from_start	2.8537464602995
SEA09020048	Euro-American	antisense_pbpA_100_from_start	2.62424502343009
SEA09167	Euro-American	antisense_pbpA_100_from_start	2.8537464602995
SEA11020038	Euro-American	antisense_pbpA_100_from_start	0.376696570866972
SEA11020057	Euro-American	antisense_pbpA_100_from_start	2.8537464602995
SEA11020068	Euro-American	antisense_pbpA_100_from_start	2.6745571540103
SEA11020092	Euro-American	antisense_pbpA_100_from_start	0
SEA11278	Lineage 7	antisense_pbpA_100_from_start	2.8537464602995
SEA12126	Indo-Oceanic	antisense_pbpA_100_from_start	2.8537464602995
SEA12202	Indo-Oceanic	antisense_pbpA_100_from_start	2.8537464602995
SEA12334	Indo-Oceanic	antisense_pbpA_100_from_start	2.8537464602995
SEA13111	Indo-Oceanic	antisense_pbpA_100_from_start	2.8537464602995
SEA14117	East-Asian	antisense_pbpA_100_from_start	2.8537464602995
SEA14333	Indo-Oceanic	antisense_pbpA_100_from_start	2.8537464602995
SEA15228	Indo-Oceanic	antisense_pbpA_100_from_start	2.8537464602995
SEA15229	Indo-Oceanic	antisense_pbpA_100_from_start	2.8537464602995
SEA15230	Indo-Oceanic	antisense_pbpA_100_from_start	2.8537464602995
SEA17020028	East-Asian	antisense_pbpA_100_from_start	2.8537464602995
SEA17020030	Euro-American	antisense_pbpA_100_from_start	2.8537464602995
1-0006	East-Asian	antisense_Rv0024_418_to_stop	2.71816382192877
1-0009	East-Asian	antisense_Rv0024_418_to_stop	2.85258873586406
1-0013	East-Asian	antisense_Rv0024_418_to_stop	2.8537464602995
1-0017	East-Asian	antisense_Rv0024_418_to_stop	2.71783850088223
1-0021	East-African-Indian	antisense_Rv0024_418_to_stop	2.8537464602995
1-0028	East-Asian	antisense_Rv0024_418_to_stop	2.8537464602995
1-0030	Indo-Oceanic	antisense_Rv0024_418_to_stop	2.8537464602995
1-0031	East-Asian	antisense_Rv0024_418_to_stop	2.8537464602995
1-0036	Euro-American	antisense_Rv0024_418_to_stop	2.8537464602995
1-0039	East-Asian	antisense_Rv0024_418_to_stop	2.8537464602995
1-0044	Euro-American	antisense_Rv0024_418_to_stop	0
1-0045	East-Asian	antisense_Rv0024_418_to_stop	2.8537464602995
1-0047	East-African-Indian	antisense_Rv0024_418_to_stop	2.8537464602995
1-0056	East-Asian	antisense_Rv0024_418_to_stop	2.8537464602995
1-0061	Indo-Oceanic	antisense_Rv0024_418_to_stop	2.8537464602995
1-0066	East-Asian	antisense_Rv0024_418_to_stop	2.8537464602995
1-0084	East-Asian	antisense_Rv0024_418_to_stop	2.84806452104701
1-0102	East-Asian	antisense_Rv0024_418_to_stop	2.8537464602995
1-0107	East-African-Indian	antisense_Rv0024_418_to_stop	2.8537464602995
1-0110	East-Asian	antisense_Rv0024_418_to_stop	2.8537464602995
1-0112	East-Asian	antisense_Rv0024_418_to_stop	2.8537464602995
1-0116	East-Asian	antisense_Rv0024_418_to_stop	2.8537464602995
1-0123	East-Asian	antisense_Rv0024_418_to_stop	2.8537464602995
1-0137	East-Asian	antisense_Rv0024_418_to_stop	2.8537464602995
1-0149	East-Asian	antisense_Rv0024_418_to_stop	2.8537464602995
1-0150	East-Asian	antisense_Rv0024_418_to_stop	2.8537464602995
1-0156	Euro-American	antisense_Rv0024_418_to_stop	0
2-0013	East-Asian	antisense_Rv0024_418_to_stop	2.8537464602995
2-0021	Euro-American	antisense_Rv0024_418_to_stop	2.8537464602995
2-0022	Euro-American	antisense_Rv0024_418_to_stop	2.8537464602995
2-0023	Euro-American	antisense_Rv0024_418_to_stop	2.78493108152989
2-0028	Euro-American	antisense_Rv0024_418_to_stop	2.8537464602995
2-0029	Euro-American	antisense_Rv0024_418_to_stop	2.8537464602995
2-0034	East-Asian	antisense_Rv0024_418_to_stop	2.8537464602995
2-0046	Euro-American	antisense_Rv0024_418_to_stop	2.8537464602995
2-0052	East-Asian	antisense_Rv0024_418_to_stop	2.8537464602995
2-0068	East-Asian	antisense_Rv0024_418_to_stop	2.8537464602995
2-0111	Euro-American	antisense_Rv0024_418_to_stop	2.8537464602995
3-0059	Euro-American	antisense_Rv0024_418_to_stop	2.8537464602995
3-0090	Indo-Oceanic	antisense_Rv0024_418_to_stop	0.0452455741067854
3-0096	Indo-Oceanic	antisense_Rv0024_418_to_stop	2.8537464602995
3-0124	Indo-Oceanic	antisense_Rv0024_418_to_stop	2.8537464602995
4-0062	East-Asian	antisense_Rv0024_418_to_stop	2.8537464602995
4-0073	Euro-American	antisense_Rv0024_418_to_stop	2.8537464602995
4-0077	East-Asian	antisense_Rv0024_418_to_stop	2.8537464602995
4-0096	East-Asian	antisense_Rv0024_418_to_stop	2.8537464602995
N0054	East-African-Indian	antisense_Rv0024_418_to_stop	2.8537464602995
N0091	M. africanum	antisense_Rv0024_418_to_stop	2.8537464602995
N0153	Indo-Oceanic	antisense_Rv0024_418_to_stop	2.8537464602995
N0157	Indo-Oceanic	antisense_Rv0024_418_to_stop	0.0897949567963098
N1063	M. africanum	antisense_Rv0024_418_to_stop	2.8537464602995
N1176	M. africanum	antisense_Rv0024_418_to_stop	2.8537464602995
N1216	Euro-American	antisense_Rv0024_418_to_stop	2.83711746387868
SEA07010354	East-African-Indian	antisense_Rv0024_418_to_stop	2.8537464602995
SEA07020250	Euro-American	antisense_Rv0024_418_to_stop	2.8537464602995
SEA08151	Indo-Oceanic	antisense_Rv0024_418_to_stop	2.8537464602995
SEA09020048	Euro-American	antisense_Rv0024_418_to_stop	2.8537464602995
SEA09167	Euro-American	antisense_Rv0024_418_to_stop	2.8537464602995
SEA11020038	Euro-American	antisense_Rv0024_418_to_stop	0
SEA11020057	Euro-American	antisense_Rv0024_418_to_stop	2.8537464602995
SEA11020092	Euro-American	antisense_Rv0024_418_to_stop	0.103438385634045
SEA12126	Indo-Oceanic	antisense_Rv0024_418_to_stop	2.8537464602995
SEA12202	Indo-Oceanic	antisense_Rv0024_418_to_stop	2.8537464602995
SEA12334	Indo-Oceanic	antisense_Rv0024_418_to_stop	2.8537464602995
SEA13111	Indo-Oceanic	antisense_Rv0024_418_to_stop	2.8537464602995
SEA14117	East-Asian	antisense_Rv0024_418_to_stop	2.8537464602995
SEA14333	Indo-Oceanic	antisense_Rv0024_418_to_stop	2.8537464602995
SEA15228	Indo-Oceanic	antisense_Rv0024_418_to_stop	2.8537464602995
SEA15229	Indo-Oceanic	antisense_Rv0024_418_to_stop	2.8537464602995
SEA15230	Indo-Oceanic	antisense_Rv0024_418_to_stop	2.8537464602995
SEA17020023	Indo-Oceanic	antisense_Rv0024_418_to_stop	0
SEA17020024	Indo-Oceanic	antisense_Rv0024_418_to_stop	0.06688738229829
SEA17020028	East-Asian	antisense_Rv0024_418_to_stop	2.8537464602995
1-0006	East-Asian	sense_Rv0030_118_from_start	2.44382585249849
1-0009	East-Asian	sense_Rv0030_118_from_start	2.65602794893601
1-0013	East-Asian	sense_Rv0030_118_from_start	2.56960772266544
1-0017	East-Asian	sense_Rv0030_118_from_start	2.60260267809867
1-0021	East-African-Indian	sense_Rv0030_118_from_start	2.6456904913938
1-0028	East-Asian	sense_Rv0030_118_from_start	2.46894250138426
1-0030	Indo-Oceanic	sense_Rv0030_118_from_start	2.73445866796638
1-0031	East-Asian	sense_Rv0030_118_from_start	2.52010664640252
1-0036	Euro-American	sense_Rv0030_118_from_start	2.83542792898727
1-0039	East-Asian	sense_Rv0030_118_from_start	2.50005852691457
1-0044	Euro-American	sense_Rv0030_118_from_start	0
1-0045	East-Asian	sense_Rv0030_118_from_start	2.8537464602995
1-0047	East-African-Indian	sense_Rv0030_118_from_start	2.51563385211427
1-0054	East-Asian	sense_Rv0030_118_from_start	2.47575144536446
1-0056	East-Asian	sense_Rv0030_118_from_start	2.79973836983973
1-0061	Indo-Oceanic	sense_Rv0030_118_from_start	2.58790613237619
1-0064	East-Asian	sense_Rv0030_118_from_start	2.46274505967511
1-0066	East-Asian	sense_Rv0030_118_from_start	2.6015709082252
1-0069	East-Asian	sense_Rv0030_118_from_start	2.51638235734524
1-0071	East-Asian	sense_Rv0030_118_from_start	2.54764033254869
1-0084	East-Asian	sense_Rv0030_118_from_start	2.54948484169604
1-0102	East-Asian	sense_Rv0030_118_from_start	2.54925585764021
1-0107	East-African-Indian	sense_Rv0030_118_from_start	2.53977614139156
1-0110	East-Asian	sense_Rv0030_118_from_start	2.57084709605745
1-0112	East-Asian	sense_Rv0030_118_from_start	2.80469884652109
1-0116	East-Asian	sense_Rv0030_118_from_start	2.52801487228748
1-0123	East-Asian	sense_Rv0030_118_from_start	2.57259977439132
1-0137	East-Asian	sense_Rv0030_118_from_start	2.8537464602995
1-0149	East-Asian	sense_Rv0030_118_from_start	2.48759961401322
1-0150	East-Asian	sense_Rv0030_118_from_start	2.74592060611134
1-0153	East-Asian	sense_Rv0030_118_from_start	2.62796081013974
1-0156	Euro-American	sense_Rv0030_118_from_start	0
2-0013	East-Asian	sense_Rv0030_118_from_start	2.534133729726
2-0021	Euro-American	sense_Rv0030_118_from_start	2.48605308289975
2-0022	Euro-American	sense_Rv0030_118_from_start	2.8537464602995
2-0023	Euro-American	sense_Rv0030_118_from_start	2.3744307025549
2-0028	Euro-American	sense_Rv0030_118_from_start	2.59682306358459
2-0029	Euro-American	sense_Rv0030_118_from_start	2.62463967401106
2-0034	East-Asian	sense_Rv0030_118_from_start	2.55334688384558
2-0043-unknown	Euro-American	sense_Rv0030_118_from_start	2.34275753281556
2-0046	Euro-American	sense_Rv0030_118_from_start	2.8418677561747
2-0052	East-Asian	sense_Rv0030_118_from_start	2.31814270461581
2-0068	East-Asian	sense_Rv0030_118_from_start	2.57273099220732
2-0111	Euro-American	sense_Rv0030_118_from_start	2.10791154700708
3-0059	Euro-American	sense_Rv0030_118_from_start	2.75624339800614
3-0090	Indo-Oceanic	sense_Rv0030_118_from_start	0
3-0096	Indo-Oceanic	sense_Rv0030_118_from_start	2.786514267075
3-0124	Indo-Oceanic	sense_Rv0030_118_from_start	2.30629166087043
4-0012	Euro-American	sense_Rv0030_118_from_start	2.56489925877039
4-0062	East-Asian	sense_Rv0030_118_from_start	2.8537464602995
4-0073	Euro-American	sense_Rv0030_118_from_start	2.08487800377826
4-0077	East-Asian	sense_Rv0030_118_from_start	2.44800685157984
4-0087	Euro-American	sense_Rv0030_118_from_start	2.75628578913997
4-0096	East-Asian	sense_Rv0030_118_from_start	2.7219789716355
N0054	East-African-Indian	sense_Rv0030_118_from_start	2.8537464602995
N0091	M. africanum	sense_Rv0030_118_from_start	2.84691508856739
N0153	Indo-Oceanic	sense_Rv0030_118_from_start	2.67569989455669
N0157	Indo-Oceanic	sense_Rv0030_118_from_start	0
N1063	M. africanum	sense_Rv0030_118_from_start	2.81784388020452
N1176	M. africanum	sense_Rv0030_118_from_start	2.41843169707012
N1216	Euro-American	sense_Rv0030_118_from_start	2.72928093391368
SEA00042	Euro-American	sense_Rv0030_118_from_start	2.66838732298255
SEA06535	Euro-American	sense_Rv0030_118_from_start	1.4037467291021
SEA07010354	East-African-Indian	sense_Rv0030_118_from_start	2.64066534319938
SEA07020250	Euro-American	sense_Rv0030_118_from_start	2.66679232214774
SEA08151	Indo-Oceanic	sense_Rv0030_118_from_start	2.55087242643107
SEA09020048	Euro-American	sense_Rv0030_118_from_start	2.40629337525251
SEA09167	Euro-American	sense_Rv0030_118_from_start	2.44890350456387
SEA11020038	Euro-American	sense_Rv0030_118_from_start	0.394127653325512
SEA11020057	Euro-American	sense_Rv0030_118_from_start	2.57080702600698
SEA11020068	Euro-American	sense_Rv0030_118_from_start	2.66889107555883
SEA11020092	Euro-American	sense_Rv0030_118_from_start	0
SEA11278	Lineage 7	sense_Rv0030_118_from_start	2.39215885759549
SEA12126	Indo-Oceanic	sense_Rv0030_118_from_start	2.34813394361108
SEA12202	Indo-Oceanic	sense_Rv0030_118_from_start	2.49438332399634
SEA12334	Indo-Oceanic	sense_Rv0030_118_from_start	2.71015219536944
SEA13111	Indo-Oceanic	sense_Rv0030_118_from_start	2.8537464602995
SEA14117	East-Asian	sense_Rv0030_118_from_start	2.41872447491437
SEA14333	Indo-Oceanic	sense_Rv0030_118_from_start	2.73111364853214
SEA15228	Indo-Oceanic	sense_Rv0030_118_from_start	2.53883470419453
SEA15229	Indo-Oceanic	sense_Rv0030_118_from_start	2.65698314938369
SEA15230	Indo-Oceanic	sense_Rv0030_118_from_start	2.82599758348998
SEA17020023	Indo-Oceanic	sense_Rv0030_118_from_start	0.233701805681185
SEA17020024	Indo-Oceanic	sense_Rv0030_118_from_start	0.0372853707844933
SEA17020028	East-Asian	sense_Rv0030_118_from_start	2.20729962872026
SEA17020030	Euro-American	sense_Rv0030_118_from_start	2.55250653412712
1-0006	East-Asian	antisense_Rv0036c_31_from_start	2.8537464602995
1-0009	East-Asian	antisense_Rv0036c_31_from_start	2.60025150095179
1-0017	East-Asian	antisense_Rv0036c_31_from_start	2.81520352287029
1-0028	East-Asian	antisense_Rv0036c_31_from_start	2.8537464602995
1-0030	Indo-Oceanic	antisense_Rv0036c_31_from_start	2.84605593224303
1-0031	East-Asian	antisense_Rv0036c_31_from_start	2.78267084748112
1-0036	Euro-American	antisense_Rv0036c_31_from_start	2.62574890523834
1-0039	East-Asian	antisense_Rv0036c_31_from_start	2.71487613802758
1-0044	Euro-American	antisense_Rv0036c_31_from_start	0.144674845366289
1-0045	East-Asian	antisense_Rv0036c_31_from_start	2.78933774824546
1-0054	East-Asian	antisense_Rv0036c_31_from_start	2.8537464602995
1-0056	East-Asian	antisense_Rv0036c_31_from_start	2.8537464602995
1-0061	Indo-Oceanic	antisense_Rv0036c_31_from_start	2.6386538338272
1-0064	East-Asian	antisense_Rv0036c_31_from_start	2.77561775459084
1-0066	East-Asian	antisense_Rv0036c_31_from_start	2.8537464602995
1-0069	East-Asian	antisense_Rv0036c_31_from_start	2.8537464602995
1-0071	East-Asian	antisense_Rv0036c_31_from_start	2.8282201679541
1-0084	East-Asian	antisense_Rv0036c_31_from_start	2.8537464602995
1-0102	East-Asian	antisense_Rv0036c_31_from_start	2.80100599304046
1-0107	East-African-Indian	antisense_Rv0036c_31_from_start	2.57285013344422
1-0110	East-Asian	antisense_Rv0036c_31_from_start	2.8537464602995
1-0112	East-Asian	antisense_Rv0036c_31_from_start	2.8537464602995
1-0116	East-Asian	antisense_Rv0036c_31_from_start	2.83964045941304
1-0123	East-Asian	antisense_Rv0036c_31_from_start	2.8537464602995
1-0137	East-Asian	antisense_Rv0036c_31_from_start	2.8537464602995
1-0149	East-Asian	antisense_Rv0036c_31_from_start	2.75919764677933
1-0150	East-Asian	antisense_Rv0036c_31_from_start	2.56647907311904
1-0153	East-Asian	antisense_Rv0036c_31_from_start	2.8537464602995
1-0156	Euro-American	antisense_Rv0036c_31_from_start	0.825374623079573
2-0013	East-Asian	antisense_Rv0036c_31_from_start	2.77551790476993
2-0021	Euro-American	antisense_Rv0036c_31_from_start	2.8537464602995
2-0022	Euro-American	antisense_Rv0036c_31_from_start	2.8537464602995
2-0023	Euro-American	antisense_Rv0036c_31_from_start	2.8537464602995
2-0028	Euro-American	antisense_Rv0036c_31_from_start	2.81951868889586
2-0029	Euro-American	antisense_Rv0036c_31_from_start	2.73005255400044
2-0034	East-Asian	antisense_Rv0036c_31_from_start	2.8537464602995
2-0043-unknown	Euro-American	antisense_Rv0036c_31_from_start	2.55669738912119
2-0046	Euro-American	antisense_Rv0036c_31_from_start	2.8537464602995
2-0052	East-Asian	antisense_Rv0036c_31_from_start	2.8537464602995
2-0068	East-Asian	antisense_Rv0036c_31_from_start	2.53046859557818
2-0111	Euro-American	antisense_Rv0036c_31_from_start	2.8537464602995
3-0059	Euro-American	antisense_Rv0036c_31_from_start	2.80600031577317
3-0090	Indo-Oceanic	antisense_Rv0036c_31_from_start	0.204122748649288
3-0096	Indo-Oceanic	antisense_Rv0036c_31_from_start	2.84144111853013
3-0124	Indo-Oceanic	antisense_Rv0036c_31_from_start	2.85110197341226
4-0012	Euro-American	antisense_Rv0036c_31_from_start	2.8537464602995
4-0062	East-Asian	antisense_Rv0036c_31_from_start	2.8537464602995
4-0073	Euro-American	antisense_Rv0036c_31_from_start	2.42761540881188
4-0077	East-Asian	antisense_Rv0036c_31_from_start	2.8537464602995
4-0087	Euro-American	antisense_Rv0036c_31_from_start	2.60384624279766
4-0096	East-Asian	antisense_Rv0036c_31_from_start	2.5653969725726
N0091	M. africanum	antisense_Rv0036c_31_from_start	2.8537464602995
N0153	Indo-Oceanic	antisense_Rv0036c_31_from_start	2.8537464602995
N0157	Indo-Oceanic	antisense_Rv0036c_31_from_start	0.308580401350673
N1063	M. africanum	antisense_Rv0036c_31_from_start	2.8537464602995
N1176	M. africanum	antisense_Rv0036c_31_from_start	2.8537464602995
N1216	Euro-American	antisense_Rv0036c_31_from_start	2.8537464602995
SEA00042	Euro-American	antisense_Rv0036c_31_from_start	2.73562965589072
SEA06535	Euro-American	antisense_Rv0036c_31_from_start	0.860524269932695
SEA07020250	Euro-American	antisense_Rv0036c_31_from_start	2.8537464602995
SEA08151	Indo-Oceanic	antisense_Rv0036c_31_from_start	2.60042201585049
SEA09020048	Euro-American	antisense_Rv0036c_31_from_start	2.8537464602995
SEA11020038	Euro-American	antisense_Rv0036c_31_from_start	0.145116845679733
SEA11020057	Euro-American	antisense_Rv0036c_31_from_start	2.79824292860374
SEA11020068	Euro-American	antisense_Rv0036c_31_from_start	2.81518295090154
SEA11020092	Euro-American	antisense_Rv0036c_31_from_start	0.211252869655028
SEA11278	Lineage 7	antisense_Rv0036c_31_from_start	2.8537464602995
SEA12126	Indo-Oceanic	antisense_Rv0036c_31_from_start	2.8537464602995
SEA12202	Indo-Oceanic	antisense_Rv0036c_31_from_start	2.8537464602995
SEA12334	Indo-Oceanic	antisense_Rv0036c_31_from_start	2.8537464602995
SEA13111	Indo-Oceanic	antisense_Rv0036c_31_from_start	2.8537464602995
SEA14117	East-Asian	antisense_Rv0036c_31_from_start	2.76298284094446
SEA14333	Indo-Oceanic	antisense_Rv0036c_31_from_start	2.60566352409844
SEA15228	Indo-Oceanic	antisense_Rv0036c_31_from_start	2.8537464602995
SEA15229	Indo-Oceanic	antisense_Rv0036c_31_from_start	2.8537464602995
SEA15230	Indo-Oceanic	antisense_Rv0036c_31_from_start	2.63199943651695
SEA17020023	Indo-Oceanic	antisense_Rv0036c_31_from_start	0.221275414981368
SEA17020024	Indo-Oceanic	antisense_Rv0036c_31_from_start	0
SEA17020028	East-Asian	antisense_Rv0036c_31_from_start	2.76402219200377
SEA17020030	Euro-American	antisense_Rv0036c_31_from_start	2.49804909993842
1-0006	East-Asian	sense_Rv0039c_127_from_start	2.43834656356928
1-0009	East-Asian	sense_Rv0039c_127_from_start	1.95950393978057
1-0013	East-Asian	sense_Rv0039c_127_from_start	1.95198088674087
1-0017	East-Asian	sense_Rv0039c_127_from_start	2.19598864531058
1-0021	East-African-Indian	sense_Rv0039c_127_from_start	1.98357655885629
1-0028	East-Asian	sense_Rv0039c_127_from_start	1.82735215769667
1-0030	Indo-Oceanic	sense_Rv0039c_127_from_start	2.27378875373161
1-0031	East-Asian	sense_Rv0039c_127_from_start	2.15000711387572
1-0036	Euro-American	sense_Rv0039c_127_from_start	2.21934478524864
1-0039	East-Asian	sense_Rv0039c_127_from_start	2.18676441701694
1-0044	Euro-American	sense_Rv0039c_127_from_start	0
1-0045	East-Asian	sense_Rv0039c_127_from_start	2.4874492425879
1-0047	East-African-Indian	sense_Rv0039c_127_from_start	2.39620407298305
1-0054	East-Asian	sense_Rv0039c_127_from_start	2.09767873539373
1-0056	East-Asian	sense_Rv0039c_127_from_start	2.22130180288659
1-0061	Indo-Oceanic	sense_Rv0039c_127_from_start	2.23291078028038
1-0064	East-Asian	sense_Rv0039c_127_from_start	2.22984637181463
1-0066	East-Asian	sense_Rv0039c_127_from_start	2.35449715695555
1-0069	East-Asian	sense_Rv0039c_127_from_start	2.43786016658292
1-0071	East-Asian	sense_Rv0039c_127_from_start	2.32978763095909
1-0084	East-Asian	sense_Rv0039c_127_from_start	2.14547126839357
1-0102	East-Asian	sense_Rv0039c_127_from_start	2.2306582447584
1-0107	East-African-Indian	sense_Rv0039c_127_from_start	2.3176816436578
1-0110	East-Asian	sense_Rv0039c_127_from_start	2.15795601762398
1-0112	East-Asian	sense_Rv0039c_127_from_start	1.94065106374582
1-0116	East-Asian	sense_Rv0039c_127_from_start	1.95792564804785
1-0123	East-Asian	sense_Rv0039c_127_from_start	2.41921263475221
1-0137	East-Asian	sense_Rv0039c_127_from_start	2.28405809798112
1-0149	East-Asian	sense_Rv0039c_127_from_start	1.89265018440794
1-0150	East-Asian	sense_Rv0039c_127_from_start	1.71639908345309
1-0153	East-Asian	sense_Rv0039c_127_from_start	2.19810577144232
1-0156	Euro-American	sense_Rv0039c_127_from_start	0
2-0013	East-Asian	sense_Rv0039c_127_from_start	2.30929442489499
2-0021	Euro-American	sense_Rv0039c_127_from_start	2.51193882201762
2-0022	Euro-American	sense_Rv0039c_127_from_start	2.30115282355802
2-0023	Euro-American	sense_Rv0039c_127_from_start	2.24198040653125
2-0028	Euro-American	sense_Rv0039c_127_from_start	1.98544076168283
2-0029	Euro-American	sense_Rv0039c_127_from_start	2.09152444117189
2-0034	East-Asian	sense_Rv0039c_127_from_start	2.36413621163535
2-0043-unknown	Euro-American	sense_Rv0039c_127_from_start	2.10664382538056
2-0046	Euro-American	sense_Rv0039c_127_from_start	2.27367973366976
2-0052	East-Asian	sense_Rv0039c_127_from_start	2.22267148386198
2-0068	East-Asian	sense_Rv0039c_127_from_start	2.3672845065282
2-0111	Euro-American	sense_Rv0039c_127_from_start	2.56014369287681
3-0059	Euro-American	sense_Rv0039c_127_from_start	2.21438330583271
3-0090	Indo-Oceanic	sense_Rv0039c_127_from_start	0.213095558813495
3-0096	Indo-Oceanic	sense_Rv0039c_127_from_start	1.92831020352165
3-0124	Indo-Oceanic	sense_Rv0039c_127_from_start	2.57914122143111
4-0012	Euro-American	sense_Rv0039c_127_from_start	2.30131266359289
4-0062	East-Asian	sense_Rv0039c_127_from_start	2.20808661400874
4-0073	Euro-American	sense_Rv0039c_127_from_start	2.34399929034708
4-0077	East-Asian	sense_Rv0039c_127_from_start	2.45121224828646
4-0087	Euro-American	sense_Rv0039c_127_from_start	2.03839456591395
4-0096	East-Asian	sense_Rv0039c_127_from_start	2.1991281204681
N0054	East-African-Indian	sense_Rv0039c_127_from_start	2.5255939819393
N0091	M. africanum	sense_Rv0039c_127_from_start	2.28408560633582
N0153	Indo-Oceanic	sense_Rv0039c_127_from_start	2.18841631675579
N0157	Indo-Oceanic	sense_Rv0039c_127_from_start	0
N1063	M. africanum	sense_Rv0039c_127_from_start	2.34321996865091
N1176	M. africanum	sense_Rv0039c_127_from_start	2.42591427340133
N1216	Euro-American	sense_Rv0039c_127_from_start	2.16127616507868
SEA00042	Euro-American	sense_Rv0039c_127_from_start	2.5208409773752
SEA06535	Euro-American	sense_Rv0039c_127_from_start	0.543695844692171
SEA07010354	East-African-Indian	sense_Rv0039c_127_from_start	1.99664372485432
SEA07020250	Euro-American	sense_Rv0039c_127_from_start	2.47354780026108
SEA08151	Indo-Oceanic	sense_Rv0039c_127_from_start	2.04757170028309
SEA09020048	Euro-American	sense_Rv0039c_127_from_start	1.89914376455696
SEA09167	Euro-American	sense_Rv0039c_127_from_start	2.09623608274304
SEA11020038	Euro-American	sense_Rv0039c_127_from_start	0.0234492705533273
SEA11020057	Euro-American	sense_Rv0039c_127_from_start	2.23509365225885
SEA11020068	Euro-American	sense_Rv0039c_127_from_start	1.93955061749422
SEA11020092	Euro-American	sense_Rv0039c_127_from_start	0.13800388762439
SEA11278	Lineage 7	sense_Rv0039c_127_from_start	2.00783576609724
SEA12126	Indo-Oceanic	sense_Rv0039c_127_from_start	2.36523399759037
SEA12202	Indo-Oceanic	sense_Rv0039c_127_from_start	1.80168274176983
SEA12334	Indo-Oceanic	sense_Rv0039c_127_from_start	2.08202106520313
SEA13111	Indo-Oceanic	sense_Rv0039c_127_from_start	2.29324003876834
SEA14117	East-Asian	sense_Rv0039c_127_from_start	1.93530263300543
SEA14333	Indo-Oceanic	sense_Rv0039c_127_from_start	2.23601578368362
SEA15228	Indo-Oceanic	sense_Rv0039c_127_from_start	2.40570544865739
SEA15229	Indo-Oceanic	sense_Rv0039c_127_from_start	2.00427715642759
SEA15230	Indo-Oceanic	sense_Rv0039c_127_from_start	2.27901629688543
SEA17020023	Indo-Oceanic	sense_Rv0039c_127_from_start	0
SEA17020024	Indo-Oceanic	sense_Rv0039c_127_from_start	0.27445403324816
SEA17020028	East-Asian	sense_Rv0039c_127_from_start	2.14122527828492
SEA17020030	Euro-American	sense_Rv0039c_127_from_start	1.8247115258525
1-0006	East-Asian	2_up_of_Rv0045c	2.64488893325482
1-0009	East-Asian	2_up_of_Rv0045c	2.44875381828118
1-0013	East-Asian	2_up_of_Rv0045c	2.8537464602995
1-0017	East-Asian	2_up_of_Rv0045c	2.37226328172624
1-0021	East-African-Indian	2_up_of_Rv0045c	2.62688064161904
1-0028	East-Asian	2_up_of_Rv0045c	2.8537464602995
1-0030	Indo-Oceanic	2_up_of_Rv0045c	2.76933683871917
1-0031	East-Asian	2_up_of_Rv0045c	2.69134171311599
1-0036	Euro-American	2_up_of_Rv0045c	2.8537464602995
1-0039	East-Asian	2_up_of_Rv0045c	2.84611076510136
1-0044	Euro-American	2_up_of_Rv0045c	0.325087861932192
1-0045	East-Asian	2_up_of_Rv0045c	2.70311229543313
1-0047	East-African-Indian	2_up_of_Rv0045c	2.79005035500957
1-0054	East-Asian	2_up_of_Rv0045c	2.75347262083003
1-0056	East-Asian	2_up_of_Rv0045c	2.8537464602995
1-0061	Indo-Oceanic	2_up_of_Rv0045c	2.43886746268403
1-0064	East-Asian	2_up_of_Rv0045c	2.75711293783984
1-0066	East-Asian	2_up_of_Rv0045c	2.8537464602995
1-0069	East-Asian	2_up_of_Rv0045c	2.65074876685726
1-0071	East-Asian	2_up_of_Rv0045c	2.65034641339629
1-0084	East-Asian	2_up_of_Rv0045c	2.25211467828391
1-0102	East-Asian	2_up_of_Rv0045c	2.8537464602995
1-0107	East-African-Indian	2_up_of_Rv0045c	2.67753503199602
1-0110	East-Asian	2_up_of_Rv0045c	2.76719275549959
1-0112	East-Asian	2_up_of_Rv0045c	2.8537464602995
1-0116	East-Asian	2_up_of_Rv0045c	2.52152185958563
1-0123	East-Asian	2_up_of_Rv0045c	2.72436940314764
1-0137	East-Asian	2_up_of_Rv0045c	2.80810455022239
1-0149	East-Asian	2_up_of_Rv0045c	2.8537464602995
1-0150	East-Asian	2_up_of_Rv0045c	2.63195473222812
1-0153	East-Asian	2_up_of_Rv0045c	2.8537464602995
1-0156	Euro-American	2_up_of_Rv0045c	0
2-0013	East-Asian	2_up_of_Rv0045c	2.83166596828516
2-0021	Euro-American	2_up_of_Rv0045c	2.8537464602995
2-0022	Euro-American	2_up_of_Rv0045c	2.71525015008225
2-0023	Euro-American	2_up_of_Rv0045c	2.8537464602995
2-0028	Euro-American	2_up_of_Rv0045c	2.78763914439959
2-0029	Euro-American	2_up_of_Rv0045c	2.45701576323896
2-0034	East-Asian	2_up_of_Rv0045c	2.43995581621246
2-0043-unknown	Euro-American	2_up_of_Rv0045c	2.60842147106454
2-0046	Euro-American	2_up_of_Rv0045c	2.58083955410286
2-0052	East-Asian	2_up_of_Rv0045c	2.6944610242269
2-0068	East-Asian	2_up_of_Rv0045c	2.70205625642402
2-0111	Euro-American	2_up_of_Rv0045c	2.2973221367101
3-0059	Euro-American	2_up_of_Rv0045c	2.8537464602995
3-0090	Indo-Oceanic	2_up_of_Rv0045c	0
3-0096	Indo-Oceanic	2_up_of_Rv0045c	2.51111459607539
3-0124	Indo-Oceanic	2_up_of_Rv0045c	2.58747979203932
4-0012	Euro-American	2_up_of_Rv0045c	2.71988553662256
4-0062	East-Asian	2_up_of_Rv0045c	2.62615180598515
4-0073	Euro-American	2_up_of_Rv0045c	2.50133582809517
4-0077	East-Asian	2_up_of_Rv0045c	2.6008654140732
4-0087	Euro-American	2_up_of_Rv0045c	2.60069015646846
4-0096	East-Asian	2_up_of_Rv0045c	2.80572937184714
N0054	East-African-Indian	2_up_of_Rv0045c	2.8537464602995
N0091	M. africanum	2_up_of_Rv0045c	2.46654362818145
N0153	Indo-Oceanic	2_up_of_Rv0045c	2.82737160060144
N0157	Indo-Oceanic	2_up_of_Rv0045c	0
N1063	M. africanum	2_up_of_Rv0045c	2.69006268252111
N1176	M. africanum	2_up_of_Rv0045c	2.8537464602995
N1216	Euro-American	2_up_of_Rv0045c	2.72796819948199
SEA00042	Euro-American	2_up_of_Rv0045c	2.6981490496737
SEA06535	Euro-American	2_up_of_Rv0045c	0.44248655302098
SEA07010354	East-African-Indian	2_up_of_Rv0045c	2.75243611771928
SEA08151	Indo-Oceanic	2_up_of_Rv0045c	2.8537464602995
SEA09020048	Euro-American	2_up_of_Rv0045c	2.78143296755558
SEA09167	Euro-American	2_up_of_Rv0045c	2.26747631772302
SEA11020038	Euro-American	2_up_of_Rv0045c	0.199005278041161
SEA11020057	Euro-American	2_up_of_Rv0045c	1.9643434560749
SEA11020068	Euro-American	2_up_of_Rv0045c	2.8537464602995
SEA11020092	Euro-American	2_up_of_Rv0045c	0
SEA11278	Lineage 7	2_up_of_Rv0045c	2.8537464602995
SEA12126	Indo-Oceanic	2_up_of_Rv0045c	2.62095794443551
SEA12202	Indo-Oceanic	2_up_of_Rv0045c	2.63091430561136
SEA12334	Indo-Oceanic	2_up_of_Rv0045c	2.71366454047833
SEA13111	Indo-Oceanic	2_up_of_Rv0045c	2.6055487014439
SEA14117	East-Asian	2_up_of_Rv0045c	2.61109839506236
SEA14333	Indo-Oceanic	2_up_of_Rv0045c	2.74349737298798
SEA15228	Indo-Oceanic	2_up_of_Rv0045c	2.8537464602995
SEA15229	Indo-Oceanic	2_up_of_Rv0045c	2.41090880901558
SEA15230	Indo-Oceanic	2_up_of_Rv0045c	2.51099874965158
SEA17020023	Indo-Oceanic	2_up_of_Rv0045c	0.00490244791170016
SEA17020024	Indo-Oceanic	2_up_of_Rv0045c	0
SEA17020028	East-Asian	2_up_of_Rv0045c	2.58359342672417
SEA17020030	Euro-American	2_up_of_Rv0045c	2.62229834905041
1-0006	East-Asian	antisense_Rv0048c_103_from_start	2.69537555724709
1-0009	East-Asian	antisense_Rv0048c_103_from_start	2.26932277514836
1-0013	East-Asian	antisense_Rv0048c_103_from_start	2.74220146201662
1-0017	East-Asian	antisense_Rv0048c_103_from_start	2.82806074358982
1-0021	East-African-Indian	antisense_Rv0048c_103_from_start	2.5641953734031
1-0028	East-Asian	antisense_Rv0048c_103_from_start	2.42564715642393
1-0030	Indo-Oceanic	antisense_Rv0048c_103_from_start	2.51818824482296
1-0031	East-Asian	antisense_Rv0048c_103_from_start	2.22019125903325
1-0036	Euro-American	antisense_Rv0048c_103_from_start	2.46365970696879
1-0039	East-Asian	antisense_Rv0048c_103_from_start	2.68331916491836
1-0044	Euro-American	antisense_Rv0048c_103_from_start	0.314299066021337
1-0045	East-Asian	antisense_Rv0048c_103_from_start	2.49138208020983
1-0047	East-African-Indian	antisense_Rv0048c_103_from_start	2.46666108378319
1-0054	East-Asian	antisense_Rv0048c_103_from_start	2.52848628630426
1-0056	East-Asian	antisense_Rv0048c_103_from_start	2.7561032410304
1-0061	Indo-Oceanic	antisense_Rv0048c_103_from_start	2.84563975438668
1-0064	East-Asian	antisense_Rv0048c_103_from_start	2.5182196514566
1-0066	East-Asian	antisense_Rv0048c_103_from_start	2.70161993450871
1-0069	East-Asian	antisense_Rv0048c_103_from_start	2.62842279649069
1-0071	East-Asian	antisense_Rv0048c_103_from_start	2.76636001989617
1-0084	East-Asian	antisense_Rv0048c_103_from_start	2.74157432671992
1-0102	East-Asian	antisense_Rv0048c_103_from_start	2.8537464602995
1-0107	East-African-Indian	antisense_Rv0048c_103_from_start	2.8537464602995
1-0110	East-Asian	antisense_Rv0048c_103_from_start	2.8537464602995
1-0112	East-Asian	antisense_Rv0048c_103_from_start	2.80448017353228
1-0116	East-Asian	antisense_Rv0048c_103_from_start	2.8344111115625
1-0123	East-Asian	antisense_Rv0048c_103_from_start	2.74523135948036
1-0137	East-Asian	antisense_Rv0048c_103_from_start	2.8537464602995
1-0149	East-Asian	antisense_Rv0048c_103_from_start	2.38973793951025
1-0150	East-Asian	antisense_Rv0048c_103_from_start	2.31206542240486
1-0153	East-Asian	antisense_Rv0048c_103_from_start	2.8537464602995
1-0156	Euro-American	antisense_Rv0048c_103_from_start	0
2-0013	East-Asian	antisense_Rv0048c_103_from_start	2.32841511948209
2-0021	Euro-American	antisense_Rv0048c_103_from_start	2.70084863783707
2-0022	Euro-American	antisense_Rv0048c_103_from_start	2.35466043482579
2-0023	Euro-American	antisense_Rv0048c_103_from_start	2.80598328861676
2-0028	Euro-American	antisense_Rv0048c_103_from_start	2.46529772905649
2-0029	Euro-American	antisense_Rv0048c_103_from_start	2.8537464602995
2-0034	East-Asian	antisense_Rv0048c_103_from_start	2.4258050897962
2-0043-unknown	Euro-American	antisense_Rv0048c_103_from_start	2.68304152739477
2-0046	Euro-American	antisense_Rv0048c_103_from_start	2.57391275745781
2-0052	East-Asian	antisense_Rv0048c_103_from_start	2.73555252604514
2-0068	East-Asian	antisense_Rv0048c_103_from_start	2.72618738497387
2-0111	Euro-American	antisense_Rv0048c_103_from_start	2.46813367390173
3-0059	Euro-American	antisense_Rv0048c_103_from_start	2.79533831775234
3-0090	Indo-Oceanic	antisense_Rv0048c_103_from_start	0
3-0096	Indo-Oceanic	antisense_Rv0048c_103_from_start	2.78696030048121
3-0124	Indo-Oceanic	antisense_Rv0048c_103_from_start	2.44262568017081
4-0012	Euro-American	antisense_Rv0048c_103_from_start	2.54900232703441
4-0062	East-Asian	antisense_Rv0048c_103_from_start	2.65616226818774
4-0073	Euro-American	antisense_Rv0048c_103_from_start	2.28739201371873
4-0077	East-Asian	antisense_Rv0048c_103_from_start	2.8537464602995
4-0087	Euro-American	antisense_Rv0048c_103_from_start	2.4456052465975
4-0096	East-Asian	antisense_Rv0048c_103_from_start	2.50715365884432
N0054	East-African-Indian	antisense_Rv0048c_103_from_start	2.68383333927006
N0091	M. africanum	antisense_Rv0048c_103_from_start	2.68430822719992
N0153	Indo-Oceanic	antisense_Rv0048c_103_from_start	2.71750113587888
N0157	Indo-Oceanic	antisense_Rv0048c_103_from_start	0
N1063	M. africanum	antisense_Rv0048c_103_from_start	2.42473474658636
N1176	M. africanum	antisense_Rv0048c_103_from_start	2.68985737316306
N1216	Euro-American	antisense_Rv0048c_103_from_start	2.66373836379393
SEA00042	Euro-American	antisense_Rv0048c_103_from_start	2.70641009045356
SEA06535	Euro-American	antisense_Rv0048c_103_from_start	0.201776274617343
SEA07010354	East-African-Indian	antisense_Rv0048c_103_from_start	2.83087218993575
SEA07020250	Euro-American	antisense_Rv0048c_103_from_start	2.7283870776274
SEA08151	Indo-Oceanic	antisense_Rv0048c_103_from_start	2.76756099446196
SEA09020048	Euro-American	antisense_Rv0048c_103_from_start	2.8537464602995
SEA09167	Euro-American	antisense_Rv0048c_103_from_start	2.46652566816331
SEA11020038	Euro-American	antisense_Rv0048c_103_from_start	0.963995420343085
SEA11020057	Euro-American	antisense_Rv0048c_103_from_start	2.78190086987196
SEA11020068	Euro-American	antisense_Rv0048c_103_from_start	2.80219768035691
SEA11020092	Euro-American	antisense_Rv0048c_103_from_start	0.0346573746065169
SEA11278	Lineage 7	antisense_Rv0048c_103_from_start	2.8537464602995
SEA12126	Indo-Oceanic	antisense_Rv0048c_103_from_start	2.72103813395473
SEA12202	Indo-Oceanic	antisense_Rv0048c_103_from_start	2.8537464602995
SEA12334	Indo-Oceanic	antisense_Rv0048c_103_from_start	2.30708007198608
SEA13111	Indo-Oceanic	antisense_Rv0048c_103_from_start	2.8537464602995
SEA14117	East-Asian	antisense_Rv0048c_103_from_start	2.5428312096638
SEA14333	Indo-Oceanic	antisense_Rv0048c_103_from_start	2.56263150873501
SEA15228	Indo-Oceanic	antisense_Rv0048c_103_from_start	2.69413847408966
SEA15229	Indo-Oceanic	antisense_Rv0048c_103_from_start	2.58668653670333
SEA15230	Indo-Oceanic	antisense_Rv0048c_103_from_start	2.57215391715025
SEA17020023	Indo-Oceanic	antisense_Rv0048c_103_from_start	0
SEA17020024	Indo-Oceanic	antisense_Rv0048c_103_from_start	0
SEA17020028	East-Asian	antisense_Rv0048c_103_from_start	2.19010173583886
SEA17020030	Euro-American	antisense_Rv0048c_103_from_start	2.47228600387334
1-0006	East-Asian	antisense_Rv0051_271_to_stop	2.8537464602995
1-0009	East-Asian	antisense_Rv0051_271_to_stop	2.8537464602995
1-0013	East-Asian	antisense_Rv0051_271_to_stop	2.8537464602995
1-0017	East-Asian	antisense_Rv0051_271_to_stop	2.8537464602995
1-0021	East-African-Indian	antisense_Rv0051_271_to_stop	2.8537464602995
1-0028	East-Asian	antisense_Rv0051_271_to_stop	2.8537464602995
1-0030	Indo-Oceanic	antisense_Rv0051_271_to_stop	2.8537464602995
1-0031	East-Asian	antisense_Rv0051_271_to_stop	2.66259036219567
1-0036	Euro-American	antisense_Rv0051_271_to_stop	2.8537464602995
1-0039	East-Asian	antisense_Rv0051_271_to_stop	2.8537464602995
1-0044	Euro-American	antisense_Rv0051_271_to_stop	0
1-0045	East-Asian	antisense_Rv0051_271_to_stop	2.8537464602995
1-0047	East-African-Indian	antisense_Rv0051_271_to_stop	2.8537464602995
1-0054	East-Asian	antisense_Rv0051_271_to_stop	2.8537464602995
1-0056	East-Asian	antisense_Rv0051_271_to_stop	2.8537464602995
1-0061	Indo-Oceanic	antisense_Rv0051_271_to_stop	2.8537464602995
1-0064	East-Asian	antisense_Rv0051_271_to_stop	2.8537464602995
1-0066	East-Asian	antisense_Rv0051_271_to_stop	2.8537464602995
1-0069	East-Asian	antisense_Rv0051_271_to_stop	2.8537464602995
1-0071	East-Asian	antisense_Rv0051_271_to_stop	2.8537464602995
1-0084	East-Asian	antisense_Rv0051_271_to_stop	2.8537464602995
1-0102	East-Asian	antisense_Rv0051_271_to_stop	2.8537464602995
1-0107	East-African-Indian	antisense_Rv0051_271_to_stop	2.8537464602995
1-0110	East-Asian	antisense_Rv0051_271_to_stop	2.8537464602995
1-0112	East-Asian	antisense_Rv0051_271_to_stop	2.8537464602995
1-0116	East-Asian	antisense_Rv0051_271_to_stop	2.8537464602995
1-0123	East-Asian	antisense_Rv0051_271_to_stop	2.8537464602995
1-0137	East-Asian	antisense_Rv0051_271_to_stop	2.8537464602995
1-0149	East-Asian	antisense_Rv0051_271_to_stop	2.8537464602995
1-0150	East-Asian	antisense_Rv0051_271_to_stop	2.8537464602995
1-0153	East-Asian	antisense_Rv0051_271_to_stop	2.8537464602995
1-0156	Euro-American	antisense_Rv0051_271_to_stop	0
2-0013	East-Asian	antisense_Rv0051_271_to_stop	2.8537464602995
2-0021	Euro-American	antisense_Rv0051_271_to_stop	2.8537464602995
2-0022	Euro-American	antisense_Rv0051_271_to_stop	2.8537464602995
2-0023	Euro-American	antisense_Rv0051_271_to_stop	2.8537464602995
2-0028	Euro-American	antisense_Rv0051_271_to_stop	2.8537464602995
2-0029	Euro-American	antisense_Rv0051_271_to_stop	2.46732549224274
2-0034	East-Asian	antisense_Rv0051_271_to_stop	2.8537464602995
2-0043-unknown	Euro-American	antisense_Rv0051_271_to_stop	2.8537464602995
2-0046	Euro-American	antisense_Rv0051_271_to_stop	2.8537464602995
2-0052	East-Asian	antisense_Rv0051_271_to_stop	2.8537464602995
2-0068	East-Asian	antisense_Rv0051_271_to_stop	2.8537464602995
2-0111	Euro-American	antisense_Rv0051_271_to_stop	2.8537464602995
3-0059	Euro-American	antisense_Rv0051_271_to_stop	2.8537464602995
3-0090	Indo-Oceanic	antisense_Rv0051_271_to_stop	0.602672125139562
3-0096	Indo-Oceanic	antisense_Rv0051_271_to_stop	2.8537464602995
4-0012	Euro-American	antisense_Rv0051_271_to_stop	2.8537464602995
4-0062	East-Asian	antisense_Rv0051_271_to_stop	2.8537464602995
4-0073	Euro-American	antisense_Rv0051_271_to_stop	2.8537464602995
4-0077	East-Asian	antisense_Rv0051_271_to_stop	2.8537464602995
4-0087	Euro-American	antisense_Rv0051_271_to_stop	2.8537464602995
4-0096	East-Asian	antisense_Rv0051_271_to_stop	2.8537464602995
N0054	East-African-Indian	antisense_Rv0051_271_to_stop	2.8537464602995
N0091	M. africanum	antisense_Rv0051_271_to_stop	2.8537464602995
N0153	Indo-Oceanic	antisense_Rv0051_271_to_stop	2.8537464602995
N0157	Indo-Oceanic	antisense_Rv0051_271_to_stop	0.104321070774199
N1063	M. africanum	antisense_Rv0051_271_to_stop	2.8537464602995
N1176	M. africanum	antisense_Rv0051_271_to_stop	2.8537464602995
N1216	Euro-American	antisense_Rv0051_271_to_stop	2.8537464602995
SEA00042	Euro-American	antisense_Rv0051_271_to_stop	2.8537464602995
SEA06535	Euro-American	antisense_Rv0051_271_to_stop	0.942350541483815
SEA07010354	East-African-Indian	antisense_Rv0051_271_to_stop	2.8537464602995
SEA07020250	Euro-American	antisense_Rv0051_271_to_stop	2.67051660957483
SEA08151	Indo-Oceanic	antisense_Rv0051_271_to_stop	2.8537464602995
SEA09020048	Euro-American	antisense_Rv0051_271_to_stop	2.8537464602995
SEA09167	Euro-American	antisense_Rv0051_271_to_stop	2.8537464602995
SEA11020038	Euro-American	antisense_Rv0051_271_to_stop	0.301095252218769
SEA11020057	Euro-American	antisense_Rv0051_271_to_stop	2.8537464602995
SEA11020068	Euro-American	antisense_Rv0051_271_to_stop	2.8537464602995
SEA11020092	Euro-American	antisense_Rv0051_271_to_stop	0.157004849554446
SEA11278	Lineage 7	antisense_Rv0051_271_to_stop	2.8537464602995
SEA12126	Indo-Oceanic	antisense_Rv0051_271_to_stop	2.8537464602995
SEA12202	Indo-Oceanic	antisense_Rv0051_271_to_stop	2.8537464602995
SEA12334	Indo-Oceanic	antisense_Rv0051_271_to_stop	2.8537464602995
SEA13111	Indo-Oceanic	antisense_Rv0051_271_to_stop	2.8537464602995
SEA14117	East-Asian	antisense_Rv0051_271_to_stop	2.8537464602995
SEA14333	Indo-Oceanic	antisense_Rv0051_271_to_stop	2.8537464602995
SEA15228	Indo-Oceanic	antisense_Rv0051_271_to_stop	2.8537464602995
SEA15229	Indo-Oceanic	antisense_Rv0051_271_to_stop	2.8537464602995
SEA15230	Indo-Oceanic	antisense_Rv0051_271_to_stop	2.8537464602995
SEA17020023	Indo-Oceanic	antisense_Rv0051_271_to_stop	0.719658808042384
SEA17020024	Indo-Oceanic	antisense_Rv0051_271_to_stop	0.132351695810171
SEA17020028	East-Asian	antisense_Rv0051_271_to_stop	2.8537464602995
SEA17020030	Euro-American	antisense_Rv0051_271_to_stop	2.8537464602995
1-0006	East-Asian	antisense_rpsR1_86_to_stop	2.66965177728373
1-0009	East-Asian	antisense_rpsR1_86_to_stop	2.61658739148381
1-0013	East-Asian	antisense_rpsR1_86_to_stop	2.56742053192091
1-0017	East-Asian	antisense_rpsR1_86_to_stop	2.68584239081024
1-0021	East-African-Indian	antisense_rpsR1_86_to_stop	2.61598467575672
1-0028	East-Asian	antisense_rpsR1_86_to_stop	2.56664906673737
1-0030	Indo-Oceanic	antisense_rpsR1_86_to_stop	2.48939400563909
1-0031	East-Asian	antisense_rpsR1_86_to_stop	2.72621557197432
1-0036	Euro-American	antisense_rpsR1_86_to_stop	2.49065559030337
1-0039	East-Asian	antisense_rpsR1_86_to_stop	2.4298939415583
1-0044	Euro-American	antisense_rpsR1_86_to_stop	0.439829948105196
1-0045	East-Asian	antisense_rpsR1_86_to_stop	2.78272035907939
1-0047	East-African-Indian	antisense_rpsR1_86_to_stop	2.51929286323732
1-0054	East-Asian	antisense_rpsR1_86_to_stop	2.81355014183762
1-0056	East-Asian	antisense_rpsR1_86_to_stop	2.56140824984716
1-0061	Indo-Oceanic	antisense_rpsR1_86_to_stop	2.34240165109998
1-0064	East-Asian	antisense_rpsR1_86_to_stop	2.45100577893918
1-0066	East-Asian	antisense_rpsR1_86_to_stop	2.42526552632767
1-0069	East-Asian	antisense_rpsR1_86_to_stop	2.42738220973709
1-0071	East-Asian	antisense_rpsR1_86_to_stop	2.23464453692823
1-0084	East-Asian	antisense_rpsR1_86_to_stop	2.26904079100902
1-0102	East-Asian	antisense_rpsR1_86_to_stop	2.73528001969006
1-0107	East-African-Indian	antisense_rpsR1_86_to_stop	2.33955899587679
1-0110	East-Asian	antisense_rpsR1_86_to_stop	2.32742338383933
1-0112	East-Asian	antisense_rpsR1_86_to_stop	2.47388787622114
1-0116	East-Asian	antisense_rpsR1_86_to_stop	2.66415864566259
1-0123	East-Asian	antisense_rpsR1_86_to_stop	2.38151016295097
1-0137	East-Asian	antisense_rpsR1_86_to_stop	2.64145907459165
1-0149	East-Asian	antisense_rpsR1_86_to_stop	2.52819615285556
1-0150	East-Asian	antisense_rpsR1_86_to_stop	2.8537464602995
1-0153	East-Asian	antisense_rpsR1_86_to_stop	1.90960067809241
1-0156	Euro-American	antisense_rpsR1_86_to_stop	0
2-0013	East-Asian	antisense_rpsR1_86_to_stop	2.72117059397282
2-0021	Euro-American	antisense_rpsR1_86_to_stop	2.5674042983102
2-0022	Euro-American	antisense_rpsR1_86_to_stop	2.8537464602995
2-0023	Euro-American	antisense_rpsR1_86_to_stop	2.22835951563885
2-0028	Euro-American	antisense_rpsR1_86_to_stop	2.68820678246323
2-0029	Euro-American	antisense_rpsR1_86_to_stop	2.73421807710962
2-0034	East-Asian	antisense_rpsR1_86_to_stop	2.72234373843399
2-0043-unknown	Euro-American	antisense_rpsR1_86_to_stop	2.65547932139063
2-0046	Euro-American	antisense_rpsR1_86_to_stop	2.56565992098996
2-0052	East-Asian	antisense_rpsR1_86_to_stop	2.63239518324435
2-0068	East-Asian	antisense_rpsR1_86_to_stop	2.49163089040853
2-0111	Euro-American	antisense_rpsR1_86_to_stop	2.8537464602995
3-0059	Euro-American	antisense_rpsR1_86_to_stop	2.83361884003427
3-0090	Indo-Oceanic	antisense_rpsR1_86_to_stop	0.0220924987996054
3-0096	Indo-Oceanic	antisense_rpsR1_86_to_stop	2.53733154485102
3-0124	Indo-Oceanic	antisense_rpsR1_86_to_stop	2.75902759124736
4-0012	Euro-American	antisense_rpsR1_86_to_stop	2.58854440616038
4-0062	East-Asian	antisense_rpsR1_86_to_stop	2.53980780138984
4-0073	Euro-American	antisense_rpsR1_86_to_stop	2.8537464602995
4-0077	East-Asian	antisense_rpsR1_86_to_stop	2.81194306330511
4-0087	Euro-American	antisense_rpsR1_86_to_stop	2.8537464602995
4-0096	East-Asian	antisense_rpsR1_86_to_stop	2.78534787184912
N0054	East-African-Indian	antisense_rpsR1_86_to_stop	2.8537464602995
N0091	M. africanum	antisense_rpsR1_86_to_stop	2.8537464602995
N0153	Indo-Oceanic	antisense_rpsR1_86_to_stop	2.8537464602995
N0157	Indo-Oceanic	antisense_rpsR1_86_to_stop	0
N1063	M. africanum	antisense_rpsR1_86_to_stop	2.61302073452549
N1176	M. africanum	antisense_rpsR1_86_to_stop	2.49430656404525
N1216	Euro-American	antisense_rpsR1_86_to_stop	2.8100776626418
SEA00042	Euro-American	antisense_rpsR1_86_to_stop	2.80373216307361
SEA06535	Euro-American	antisense_rpsR1_86_to_stop	2.08279991640641
SEA07010354	East-African-Indian	antisense_rpsR1_86_to_stop	2.39921970539093
SEA07020250	Euro-American	antisense_rpsR1_86_to_stop	2.8537464602995
SEA08151	Indo-Oceanic	antisense_rpsR1_86_to_stop	2.62229016950744
SEA09020048	Euro-American	antisense_rpsR1_86_to_stop	2.58683301798496
SEA09167	Euro-American	antisense_rpsR1_86_to_stop	2.52539780016317
SEA11020038	Euro-American	antisense_rpsR1_86_to_stop	0
SEA11020057	Euro-American	antisense_rpsR1_86_to_stop	2.8537464602995
SEA11020068	Euro-American	antisense_rpsR1_86_to_stop	2.8537464602995
SEA11020092	Euro-American	antisense_rpsR1_86_to_stop	0
SEA11278	Lineage 7	antisense_rpsR1_86_to_stop	2.51785238457111
SEA12126	Indo-Oceanic	antisense_rpsR1_86_to_stop	2.36048874504006
SEA12202	Indo-Oceanic	antisense_rpsR1_86_to_stop	2.53070051451993
SEA12334	Indo-Oceanic	antisense_rpsR1_86_to_stop	2.8537464602995
SEA13111	Indo-Oceanic	antisense_rpsR1_86_to_stop	2.70391997877268
SEA14117	East-Asian	antisense_rpsR1_86_to_stop	2.28084131598053
SEA14333	Indo-Oceanic	antisense_rpsR1_86_to_stop	2.58590528167182
SEA15228	Indo-Oceanic	antisense_rpsR1_86_to_stop	2.81689429272461
SEA15229	Indo-Oceanic	antisense_rpsR1_86_to_stop	2.75271235998596
SEA15230	Indo-Oceanic	antisense_rpsR1_86_to_stop	2.82104978198686
SEA17020023	Indo-Oceanic	antisense_rpsR1_86_to_stop	0
SEA17020024	Indo-Oceanic	antisense_rpsR1_86_to_stop	0
SEA17020028	East-Asian	antisense_rpsR1_86_to_stop	1.84947058232679
SEA17020030	Euro-American	antisense_rpsR1_86_to_stop	2.54924109605999
1-0006	East-Asian	antisense_hycE_124_from_start	2.8537464602995
1-0009	East-Asian	antisense_hycE_124_from_start	2.5049161832988
1-0013	East-Asian	antisense_hycE_124_from_start	2.8537464602995
1-0017	East-Asian	antisense_hycE_124_from_start	2.23388169796495
1-0021	East-African-Indian	antisense_hycE_124_from_start	2.77751991422118
1-0028	East-Asian	antisense_hycE_124_from_start	2.49174912591223
1-0030	Indo-Oceanic	antisense_hycE_124_from_start	2.8537464602995
1-0031	East-Asian	antisense_hycE_124_from_start	2.8537464602995
1-0036	Euro-American	antisense_hycE_124_from_start	2.8537464602995
1-0039	East-Asian	antisense_hycE_124_from_start	2.71396448236319
1-0044	Euro-American	antisense_hycE_124_from_start	0
1-0045	East-Asian	antisense_hycE_124_from_start	2.72242637179918
1-0047	East-African-Indian	antisense_hycE_124_from_start	2.8537464602995
1-0054	East-Asian	antisense_hycE_124_from_start	2.8537464602995
1-0056	East-Asian	antisense_hycE_124_from_start	2.80139854843593
1-0061	Indo-Oceanic	antisense_hycE_124_from_start	2.71446546455567
1-0064	East-Asian	antisense_hycE_124_from_start	2.67828491976109
1-0066	East-Asian	antisense_hycE_124_from_start	2.8537464602995
1-0069	East-Asian	antisense_hycE_124_from_start	2.8537464602995
1-0071	East-Asian	antisense_hycE_124_from_start	2.77894606645027
1-0084	East-Asian	antisense_hycE_124_from_start	2.73790859175514
1-0102	East-Asian	antisense_hycE_124_from_start	2.8537464602995
1-0107	East-African-Indian	antisense_hycE_124_from_start	2.8537464602995
1-0110	East-Asian	antisense_hycE_124_from_start	2.50707992329942
1-0112	East-Asian	antisense_hycE_124_from_start	2.75441633548147
1-0116	East-Asian	antisense_hycE_124_from_start	2.51600485461806
1-0123	East-Asian	antisense_hycE_124_from_start	2.51167281013361
1-0137	East-Asian	antisense_hycE_124_from_start	2.8537464602995
1-0149	East-Asian	antisense_hycE_124_from_start	2.31794725644224
1-0150	East-Asian	antisense_hycE_124_from_start	2.8537464602995
1-0153	East-Asian	antisense_hycE_124_from_start	2.70227212921084
1-0156	Euro-American	antisense_hycE_124_from_start	0.435825545627527
2-0013	East-Asian	antisense_hycE_124_from_start	2.8537464602995
2-0021	Euro-American	antisense_hycE_124_from_start	2.8537464602995
2-0022	Euro-American	antisense_hycE_124_from_start	2.8537464602995
2-0023	Euro-American	antisense_hycE_124_from_start	2.51517283487493
2-0028	Euro-American	antisense_hycE_124_from_start	2.8537464602995
2-0029	Euro-American	antisense_hycE_124_from_start	2.77160296563712
2-0034	East-Asian	antisense_hycE_124_from_start	2.8537464602995
2-0043-unknown	Euro-American	antisense_hycE_124_from_start	2.82780122493087
2-0046	Euro-American	antisense_hycE_124_from_start	2.2894263977545
2-0052	East-Asian	antisense_hycE_124_from_start	2.8537464602995
2-0068	East-Asian	antisense_hycE_124_from_start	2.62405374442274
2-0111	Euro-American	antisense_hycE_124_from_start	2.8537464602995
3-0059	Euro-American	antisense_hycE_124_from_start	2.8537464602995
3-0090	Indo-Oceanic	antisense_hycE_124_from_start	0
3-0096	Indo-Oceanic	antisense_hycE_124_from_start	2.8537464602995
3-0124	Indo-Oceanic	antisense_hycE_124_from_start	2.776372161004
4-0012	Euro-American	antisense_hycE_124_from_start	2.52211187440723
4-0062	East-Asian	antisense_hycE_124_from_start	2.60304508516486
4-0073	Euro-American	antisense_hycE_124_from_start	2.8537464602995
4-0077	East-Asian	antisense_hycE_124_from_start	2.8537464602995
4-0087	Euro-American	antisense_hycE_124_from_start	2.8537464602995
4-0096	East-Asian	antisense_hycE_124_from_start	2.8537464602995
N0054	East-African-Indian	antisense_hycE_124_from_start	2.67687192078709
N0091	M. africanum	antisense_hycE_124_from_start	2.8537464602995
N0153	Indo-Oceanic	antisense_hycE_124_from_start	2.8537464602995
N0157	Indo-Oceanic	antisense_hycE_124_from_start	0
N1063	M. africanum	antisense_hycE_124_from_start	2.83006016359609
N1176	M. africanum	antisense_hycE_124_from_start	2.8537464602995
N1216	Euro-American	antisense_hycE_124_from_start	2.8537464602995
SEA00042	Euro-American	antisense_hycE_124_from_start	2.8537464602995
SEA06535	Euro-American	antisense_hycE_124_from_start	2.31467033102328
SEA07010354	East-African-Indian	antisense_hycE_124_from_start	2.8537464602995
SEA07020250	Euro-American	antisense_hycE_124_from_start	2.79898908260931
SEA08151	Indo-Oceanic	antisense_hycE_124_from_start	2.8537464602995
SEA09020048	Euro-American	antisense_hycE_124_from_start	2.81980590005123
SEA09167	Euro-American	antisense_hycE_124_from_start	2.8537464602995
SEA11020038	Euro-American	antisense_hycE_124_from_start	0.0962545784897201
SEA11020057	Euro-American	antisense_hycE_124_from_start	2.59810827437765
SEA11020068	Euro-American	antisense_hycE_124_from_start	2.65909306162795
SEA11020092	Euro-American	antisense_hycE_124_from_start	0
SEA11278	Lineage 7	antisense_hycE_124_from_start	2.71263627861413
SEA12126	Indo-Oceanic	antisense_hycE_124_from_start	2.8537464602995
SEA12202	Indo-Oceanic	antisense_hycE_124_from_start	2.74229710905822
SEA12334	Indo-Oceanic	antisense_hycE_124_from_start	2.77399582298856
SEA13111	Indo-Oceanic	antisense_hycE_124_from_start	2.63644479328611
SEA14333	Indo-Oceanic	antisense_hycE_124_from_start	2.6406077466846
SEA15228	Indo-Oceanic	antisense_hycE_124_from_start	2.8537464602995
SEA15229	Indo-Oceanic	antisense_hycE_124_from_start	2.8537464602995
SEA15230	Indo-Oceanic	antisense_hycE_124_from_start	2.8537464602995
SEA17020023	Indo-Oceanic	antisense_hycE_124_from_start	0
SEA17020024	Indo-Oceanic	antisense_hycE_124_from_start	0.121645189968768
SEA17020028	East-Asian	antisense_hycE_124_from_start	2.78644629518298
SEA17020030	Euro-American	antisense_hycE_124_from_start	2.77353626461249
1-0006	East-Asian	antisense_hycE_589_to_stop	2.8537464602995
1-0009	East-Asian	antisense_hycE_589_to_stop	2.8537464602995
1-0013	East-Asian	antisense_hycE_589_to_stop	2.8537464602995
1-0017	East-Asian	antisense_hycE_589_to_stop	2.8537464602995
1-0021	East-African-Indian	antisense_hycE_589_to_stop	2.8537464602995
1-0028	East-Asian	antisense_hycE_589_to_stop	2.8537464602995
1-0030	Indo-Oceanic	antisense_hycE_589_to_stop	2.8537464602995
1-0031	East-Asian	antisense_hycE_589_to_stop	2.8537464602995
1-0036	Euro-American	antisense_hycE_589_to_stop	2.8537464602995
1-0039	East-Asian	antisense_hycE_589_to_stop	2.8537464602995
1-0044	Euro-American	antisense_hycE_589_to_stop	0.392744812035454
1-0045	East-Asian	antisense_hycE_589_to_stop	2.8537464602995
1-0047	East-African-Indian	antisense_hycE_589_to_stop	2.8537464602995
1-0054	East-Asian	antisense_hycE_589_to_stop	2.8537464602995
1-0056	East-Asian	antisense_hycE_589_to_stop	2.8537464602995
1-0061	Indo-Oceanic	antisense_hycE_589_to_stop	2.8537464602995
1-0064	East-Asian	antisense_hycE_589_to_stop	2.8537464602995
1-0066	East-Asian	antisense_hycE_589_to_stop	2.8537464602995
1-0069	East-Asian	antisense_hycE_589_to_stop	2.8537464602995
1-0071	East-Asian	antisense_hycE_589_to_stop	2.8537464602995
1-0084	East-Asian	antisense_hycE_589_to_stop	2.8537464602995
1-0102	East-Asian	antisense_hycE_589_to_stop	2.8537464602995
1-0107	East-African-Indian	antisense_hycE_589_to_stop	2.8537464602995
1-0110	East-Asian	antisense_hycE_589_to_stop	2.8537464602995
1-0112	East-Asian	antisense_hycE_589_to_stop	2.8537464602995
1-0116	East-Asian	antisense_hycE_589_to_stop	2.8537464602995
1-0123	East-Asian	antisense_hycE_589_to_stop	2.8537464602995
1-0137	East-Asian	antisense_hycE_589_to_stop	2.8537464602995
1-0149	East-Asian	antisense_hycE_589_to_stop	2.8537464602995
1-0150	East-Asian	antisense_hycE_589_to_stop	2.8537464602995
1-0153	East-Asian	antisense_hycE_589_to_stop	2.8537464602995
1-0156	Euro-American	antisense_hycE_589_to_stop	0
2-0013	East-Asian	antisense_hycE_589_to_stop	2.8537464602995
2-0021	Euro-American	antisense_hycE_589_to_stop	2.8537464602995
2-0022	Euro-American	antisense_hycE_589_to_stop	2.8537464602995
2-0023	Euro-American	antisense_hycE_589_to_stop	2.8537464602995
2-0028	Euro-American	antisense_hycE_589_to_stop	2.8537464602995
2-0029	Euro-American	antisense_hycE_589_to_stop	2.8537464602995
2-0034	East-Asian	antisense_hycE_589_to_stop	2.8537464602995
2-0043-unknown	Euro-American	antisense_hycE_589_to_stop	2.8537464602995
2-0046	Euro-American	antisense_hycE_589_to_stop	2.8537464602995
2-0052	East-Asian	antisense_hycE_589_to_stop	2.8537464602995
2-0068	East-Asian	antisense_hycE_589_to_stop	2.8537464602995
2-0111	Euro-American	antisense_hycE_589_to_stop	2.74729037106209
3-0059	Euro-American	antisense_hycE_589_to_stop	2.8537464602995
3-0090	Indo-Oceanic	antisense_hycE_589_to_stop	0.270710829492857
3-0096	Indo-Oceanic	antisense_hycE_589_to_stop	2.8537464602995
3-0124	Indo-Oceanic	antisense_hycE_589_to_stop	2.8537464602995
4-0012	Euro-American	antisense_hycE_589_to_stop	2.8537464602995
4-0062	East-Asian	antisense_hycE_589_to_stop	2.8537464602995
4-0073	Euro-American	antisense_hycE_589_to_stop	2.8537464602995
4-0077	East-Asian	antisense_hycE_589_to_stop	2.8537464602995
4-0087	Euro-American	antisense_hycE_589_to_stop	2.8537464602995
4-0096	East-Asian	antisense_hycE_589_to_stop	2.8537464602995
N0054	East-African-Indian	antisense_hycE_589_to_stop	2.8537464602995
N0091	M. africanum	antisense_hycE_589_to_stop	2.8537464602995
N0153	Indo-Oceanic	antisense_hycE_589_to_stop	2.8537464602995
N0157	Indo-Oceanic	antisense_hycE_589_to_stop	0
N1063	M. africanum	antisense_hycE_589_to_stop	2.8537464602995
N1176	M. africanum	antisense_hycE_589_to_stop	2.8537464602995
N1216	Euro-American	antisense_hycE_589_to_stop	2.8537464602995
SEA00042	Euro-American	antisense_hycE_589_to_stop	2.8537464602995
SEA06535	Euro-American	antisense_hycE_589_to_stop	0.548777551393568
SEA07010354	East-African-Indian	antisense_hycE_589_to_stop	2.8537464602995
SEA07020250	Euro-American	antisense_hycE_589_to_stop	2.8537464602995
SEA08151	Indo-Oceanic	antisense_hycE_589_to_stop	2.8537464602995
SEA09020048	Euro-American	antisense_hycE_589_to_stop	2.8537464602995
SEA09167	Euro-American	antisense_hycE_589_to_stop	2.8537464602995
SEA11020038	Euro-American	antisense_hycE_589_to_stop	0
SEA11020057	Euro-American	antisense_hycE_589_to_stop	2.8537464602995
SEA11020068	Euro-American	antisense_hycE_589_to_stop	2.8537464602995
SEA11020092	Euro-American	antisense_hycE_589_to_stop	0.159698958723709
SEA11278	Lineage 7	antisense_hycE_589_to_stop	2.8537464602995
SEA12126	Indo-Oceanic	antisense_hycE_589_to_stop	2.8537464602995
SEA12202	Indo-Oceanic	antisense_hycE_589_to_stop	2.8537464602995
SEA12334	Indo-Oceanic	antisense_hycE_589_to_stop	2.8537464602995
SEA13111	Indo-Oceanic	antisense_hycE_589_to_stop	2.8537464602995
SEA14333	Indo-Oceanic	antisense_hycE_589_to_stop	2.8537464602995
SEA15228	Indo-Oceanic	antisense_hycE_589_to_stop	2.8537464602995
SEA15229	Indo-Oceanic	antisense_hycE_589_to_stop	2.8537464602995
SEA15230	Indo-Oceanic	antisense_hycE_589_to_stop	2.8537464602995
SEA17020023	Indo-Oceanic	antisense_hycE_589_to_stop	0.0907438518391425
SEA17020024	Indo-Oceanic	antisense_hycE_589_to_stop	0.0229728025955358
SEA17020028	East-Asian	antisense_hycE_589_to_stop	2.8537464602995
SEA17020030	Euro-American	antisense_hycE_589_to_stop	2.8537464602995
1-0006	East-Asian	antisense_Rv0090_373_from_start	2.8537464602995
1-0009	East-Asian	antisense_Rv0090_373_from_start	2.8537464602995
1-0013	East-Asian	antisense_Rv0090_373_from_start	2.75827085337927
1-0017	East-Asian	antisense_Rv0090_373_from_start	2.8537464602995
1-0021	East-African-Indian	antisense_Rv0090_373_from_start	2.58643338346769
1-0028	East-Asian	antisense_Rv0090_373_from_start	2.64987312391808
1-0030	Indo-Oceanic	antisense_Rv0090_373_from_start	2.8537464602995
1-0031	East-Asian	antisense_Rv0090_373_from_start	2.8537464602995
1-0036	Euro-American	antisense_Rv0090_373_from_start	2.84223121918
1-0039	East-Asian	antisense_Rv0090_373_from_start	2.8537464602995
1-0044	Euro-American	antisense_Rv0090_373_from_start	0
1-0045	East-Asian	antisense_Rv0090_373_from_start	2.8537464602995
1-0054	East-Asian	antisense_Rv0090_373_from_start	2.8537464602995
1-0056	East-Asian	antisense_Rv0090_373_from_start	2.8537464602995
1-0061	Indo-Oceanic	antisense_Rv0090_373_from_start	2.8537464602995
1-0064	East-Asian	antisense_Rv0090_373_from_start	2.8537464602995
1-0066	East-Asian	antisense_Rv0090_373_from_start	2.59759037101227
1-0069	East-Asian	antisense_Rv0090_373_from_start	2.79870489046896
1-0071	East-Asian	antisense_Rv0090_373_from_start	2.62547391070423
1-0084	East-Asian	antisense_Rv0090_373_from_start	2.8537464602995
1-0102	East-Asian	antisense_Rv0090_373_from_start	2.8537464602995
1-0107	East-African-Indian	antisense_Rv0090_373_from_start	2.8537464602995
1-0110	East-Asian	antisense_Rv0090_373_from_start	2.50654100097679
1-0112	East-Asian	antisense_Rv0090_373_from_start	2.8537464602995
1-0116	East-Asian	antisense_Rv0090_373_from_start	2.8537464602995
1-0123	East-Asian	antisense_Rv0090_373_from_start	2.3944809454173
1-0137	East-Asian	antisense_Rv0090_373_from_start	2.8537464602995
1-0149	East-Asian	antisense_Rv0090_373_from_start	2.65136125377349
1-0150	East-Asian	antisense_Rv0090_373_from_start	2.85307144825474
1-0153	East-Asian	antisense_Rv0090_373_from_start	2.71312971604293
1-0156	Euro-American	antisense_Rv0090_373_from_start	0.342251430315329
2-0013	East-Asian	antisense_Rv0090_373_from_start	2.8537464602995
2-0021	Euro-American	antisense_Rv0090_373_from_start	2.66903770544513
2-0022	Euro-American	antisense_Rv0090_373_from_start	2.8537464602995
2-0023	Euro-American	antisense_Rv0090_373_from_start	2.8537464602995
2-0028	Euro-American	antisense_Rv0090_373_from_start	2.62623825330332
2-0029	Euro-American	antisense_Rv0090_373_from_start	2.70658998191182
2-0034	East-Asian	antisense_Rv0090_373_from_start	2.8537464602995
2-0043-unknown	Euro-American	antisense_Rv0090_373_from_start	2.8537464602995
2-0046	Euro-American	antisense_Rv0090_373_from_start	2.61122919887819
2-0052	East-Asian	antisense_Rv0090_373_from_start	2.8537464602995
2-0068	East-Asian	antisense_Rv0090_373_from_start	2.8537464602995
2-0111	Euro-American	antisense_Rv0090_373_from_start	2.8537464602995
3-0059	Euro-American	antisense_Rv0090_373_from_start	2.8537464602995
3-0090	Indo-Oceanic	antisense_Rv0090_373_from_start	0.433112872220159
3-0096	Indo-Oceanic	antisense_Rv0090_373_from_start	2.58453463514215
3-0124	Indo-Oceanic	antisense_Rv0090_373_from_start	2.31483918082559
4-0012	Euro-American	antisense_Rv0090_373_from_start	2.69373050015564
4-0062	East-Asian	antisense_Rv0090_373_from_start	2.78665417943252
4-0073	Euro-American	antisense_Rv0090_373_from_start	2.60307024577353
4-0077	East-Asian	antisense_Rv0090_373_from_start	2.8537464602995
4-0087	Euro-American	antisense_Rv0090_373_from_start	2.8537464602995
4-0096	East-Asian	antisense_Rv0090_373_from_start	2.68899532387371
N0054	East-African-Indian	antisense_Rv0090_373_from_start	2.8537464602995
N0091	M. africanum	antisense_Rv0090_373_from_start	2.8537464602995
N0153	Indo-Oceanic	antisense_Rv0090_373_from_start	2.8537464602995
N0157	Indo-Oceanic	antisense_Rv0090_373_from_start	0.278619203909602
N1063	M. africanum	antisense_Rv0090_373_from_start	2.8537464602995
N1176	M. africanum	antisense_Rv0090_373_from_start	2.68050398546854
N1216	Euro-American	antisense_Rv0090_373_from_start	2.8537464602995
SEA00042	Euro-American	antisense_Rv0090_373_from_start	2.8537464602995
SEA06535	Euro-American	antisense_Rv0090_373_from_start	1.60937468422878
SEA07010354	East-African-Indian	antisense_Rv0090_373_from_start	2.84158766147647
SEA07020250	Euro-American	antisense_Rv0090_373_from_start	2.8537464602995
SEA08151	Indo-Oceanic	antisense_Rv0090_373_from_start	2.82427163812344
SEA09020048	Euro-American	antisense_Rv0090_373_from_start	2.8537464602995
SEA09167	Euro-American	antisense_Rv0090_373_from_start	2.8537464602995
SEA11020038	Euro-American	antisense_Rv0090_373_from_start	0.277494893159866
SEA11020057	Euro-American	antisense_Rv0090_373_from_start	2.8537464602995
SEA11020068	Euro-American	antisense_Rv0090_373_from_start	2.8537464602995
SEA11020092	Euro-American	antisense_Rv0090_373_from_start	0.293282113102301
SEA11278	Lineage 7	antisense_Rv0090_373_from_start	2.8537464602995
SEA12126	Indo-Oceanic	antisense_Rv0090_373_from_start	2.8537464602995
SEA12202	Indo-Oceanic	antisense_Rv0090_373_from_start	2.81636358554281
SEA12334	Indo-Oceanic	antisense_Rv0090_373_from_start	2.8537464602995
SEA13111	Indo-Oceanic	antisense_Rv0090_373_from_start	2.40568423447526
SEA14117	East-Asian	antisense_Rv0090_373_from_start	2.8537464602995
SEA14333	Indo-Oceanic	antisense_Rv0090_373_from_start	2.70421364533744
SEA15228	Indo-Oceanic	antisense_Rv0090_373_from_start	2.83596780087499
SEA15229	Indo-Oceanic	antisense_Rv0090_373_from_start	2.8537464602995
SEA15230	Indo-Oceanic	antisense_Rv0090_373_from_start	2.76074423482449
SEA17020023	Indo-Oceanic	antisense_Rv0090_373_from_start	0.156180386759483
SEA17020024	Indo-Oceanic	antisense_Rv0090_373_from_start	0.616063184200092
SEA17020028	East-Asian	antisense_Rv0090_373_from_start	2.79236765517316
SEA17020030	Euro-American	antisense_Rv0090_373_from_start	2.8537464602995
1-0006	East-Asian	antisense_ctpA_77_from_start	2.54620255332994
1-0009	East-Asian	antisense_ctpA_77_from_start	2.22411377033099
1-0013	East-Asian	antisense_ctpA_77_from_start	2.31446816444731
1-0017	East-Asian	antisense_ctpA_77_from_start	2.56741920948683
1-0021	East-African-Indian	antisense_ctpA_77_from_start	2.21074882040825
1-0028	East-Asian	antisense_ctpA_77_from_start	2.40755399849581
1-0030	Indo-Oceanic	antisense_ctpA_77_from_start	2.55570783518453
1-0031	East-Asian	antisense_ctpA_77_from_start	1.81710031125129
1-0036	Euro-American	antisense_ctpA_77_from_start	2.48145665345691
1-0039	East-Asian	antisense_ctpA_77_from_start	2.31975068062122
1-0044	Euro-American	antisense_ctpA_77_from_start	0.333423721100257
1-0045	East-Asian	antisense_ctpA_77_from_start	2.59126682103583
1-0047	East-African-Indian	antisense_ctpA_77_from_start	2.45169382188771
1-0054	East-Asian	antisense_ctpA_77_from_start	2.50666295988619
1-0056	East-Asian	antisense_ctpA_77_from_start	2.38276157784714
1-0061	Indo-Oceanic	antisense_ctpA_77_from_start	1.95321711780618
1-0064	East-Asian	antisense_ctpA_77_from_start	2.31484481968241
1-0066	East-Asian	antisense_ctpA_77_from_start	2.36214292924584
1-0069	East-Asian	antisense_ctpA_77_from_start	2.46691057392372
1-0071	East-Asian	antisense_ctpA_77_from_start	2.62090520337873
1-0084	East-Asian	antisense_ctpA_77_from_start	2.65602656133976
1-0102	East-Asian	antisense_ctpA_77_from_start	2.4613211001772
1-0107	East-African-Indian	antisense_ctpA_77_from_start	2.16146881523746
1-0110	East-Asian	antisense_ctpA_77_from_start	1.69310929014909
1-0112	East-Asian	antisense_ctpA_77_from_start	2.77598974742982
1-0116	East-Asian	antisense_ctpA_77_from_start	2.48270943688096
1-0123	East-Asian	antisense_ctpA_77_from_start	2.30800822319223
1-0137	East-Asian	antisense_ctpA_77_from_start	2.64604327541787
1-0149	East-Asian	antisense_ctpA_77_from_start	2.64330625672988
1-0150	East-Asian	antisense_ctpA_77_from_start	2.54551164365561
1-0153	East-Asian	antisense_ctpA_77_from_start	2.44521950558019
1-0156	Euro-American	antisense_ctpA_77_from_start	0.481556634025786
2-0013	East-Asian	antisense_ctpA_77_from_start	2.8537464602995
2-0021	Euro-American	antisense_ctpA_77_from_start	2.72340722886694
2-0022	Euro-American	antisense_ctpA_77_from_start	2.71689505054324
2-0023	Euro-American	antisense_ctpA_77_from_start	2.01616846465366
2-0028	Euro-American	antisense_ctpA_77_from_start	2.72125289183325
2-0029	Euro-American	antisense_ctpA_77_from_start	2.35393209612401
2-0034	East-Asian	antisense_ctpA_77_from_start	2.16636154592133
2-0043-unknown	Euro-American	antisense_ctpA_77_from_start	2.57406100805941
2-0046	Euro-American	antisense_ctpA_77_from_start	2.46885585619273
2-0052	East-Asian	antisense_ctpA_77_from_start	2.45190008913285
2-0068	East-Asian	antisense_ctpA_77_from_start	1.97302992403051
2-0111	Euro-American	antisense_ctpA_77_from_start	2.23301765189861
3-0059	Euro-American	antisense_ctpA_77_from_start	2.51358920679622
3-0090	Indo-Oceanic	antisense_ctpA_77_from_start	0
3-0096	Indo-Oceanic	antisense_ctpA_77_from_start	2.55681704511532
3-0124	Indo-Oceanic	antisense_ctpA_77_from_start	2.40452039736819
4-0012	Euro-American	antisense_ctpA_77_from_start	2.63159134544066
4-0062	East-Asian	antisense_ctpA_77_from_start	2.60401529033988
4-0073	Euro-American	antisense_ctpA_77_from_start	2.72410845632297
4-0077	East-Asian	antisense_ctpA_77_from_start	2.51437939253984
4-0087	Euro-American	antisense_ctpA_77_from_start	2.36719674189877
4-0096	East-Asian	antisense_ctpA_77_from_start	2.44486938058998
N0054	East-African-Indian	antisense_ctpA_77_from_start	2.53058514775784
N0091	M. africanum	antisense_ctpA_77_from_start	2.39849534679925
N0153	Indo-Oceanic	antisense_ctpA_77_from_start	2.66950141008759
N0157	Indo-Oceanic	antisense_ctpA_77_from_start	0
N1063	M. africanum	antisense_ctpA_77_from_start	2.27336670569162
N1176	M. africanum	antisense_ctpA_77_from_start	2.79205207031586
N1216	Euro-American	antisense_ctpA_77_from_start	2.33285724365941
SEA00042	Euro-American	antisense_ctpA_77_from_start	2.79579640880233
SEA06535	Euro-American	antisense_ctpA_77_from_start	0.480213264910497
SEA07010354	East-African-Indian	antisense_ctpA_77_from_start	2.34590924507025
SEA07020250	Euro-American	antisense_ctpA_77_from_start	2.8537464602995
SEA08151	Indo-Oceanic	antisense_ctpA_77_from_start	2.75240191465505
SEA09020048	Euro-American	antisense_ctpA_77_from_start	2.20339805947981
SEA09167	Euro-American	antisense_ctpA_77_from_start	2.23778697173098
SEA11020038	Euro-American	antisense_ctpA_77_from_start	0.197682311381843
SEA11020057	Euro-American	antisense_ctpA_77_from_start	2.34670626220817
SEA11020068	Euro-American	antisense_ctpA_77_from_start	2.59480682740042
SEA11020092	Euro-American	antisense_ctpA_77_from_start	0
SEA11278	Lineage 7	antisense_ctpA_77_from_start	2.54042070815127
SEA12126	Indo-Oceanic	antisense_ctpA_77_from_start	2.72993899683969
SEA12202	Indo-Oceanic	antisense_ctpA_77_from_start	2.67000651184593
SEA12334	Indo-Oceanic	antisense_ctpA_77_from_start	2.46598366733714
SEA13111	Indo-Oceanic	antisense_ctpA_77_from_start	2.6666930775791
SEA14117	East-Asian	antisense_ctpA_77_from_start	2.74860191881229
SEA14333	Indo-Oceanic	antisense_ctpA_77_from_start	2.73599136808553
SEA15228	Indo-Oceanic	antisense_ctpA_77_from_start	2.8329084336985
SEA15229	Indo-Oceanic	antisense_ctpA_77_from_start	2.17553770565725
SEA15230	Indo-Oceanic	antisense_ctpA_77_from_start	2.42066879322687
SEA17020023	Indo-Oceanic	antisense_ctpA_77_from_start	0.0838966864428673
SEA17020024	Indo-Oceanic	antisense_ctpA_77_from_start	0
SEA17020028	East-Asian	antisense_ctpA_77_from_start	2.36914663151922
SEA17020030	Euro-American	antisense_ctpA_77_from_start	2.27413597113442
1-0006	East-Asian	antisense_ctpB_712_from_start	2.8537464602995
1-0009	East-Asian	antisense_ctpB_712_from_start	2.77745974396296
1-0013	East-Asian	antisense_ctpB_712_from_start	2.8537464602995
1-0017	East-Asian	antisense_ctpB_712_from_start	2.8537464602995
1-0021	East-African-Indian	antisense_ctpB_712_from_start	2.8537464602995
1-0028	East-Asian	antisense_ctpB_712_from_start	2.8537464602995
1-0030	Indo-Oceanic	antisense_ctpB_712_from_start	2.77792620507355
1-0031	East-Asian	antisense_ctpB_712_from_start	2.74783764881418
1-0036	Euro-American	antisense_ctpB_712_from_start	2.8537464602995
1-0039	East-Asian	antisense_ctpB_712_from_start	2.8537464602995
1-0044	Euro-American	antisense_ctpB_712_from_start	0.0682504045101276
1-0045	East-Asian	antisense_ctpB_712_from_start	2.8537464602995
1-0047	East-African-Indian	antisense_ctpB_712_from_start	2.8537464602995
1-0054	East-Asian	antisense_ctpB_712_from_start	2.77860032663538
1-0056	East-Asian	antisense_ctpB_712_from_start	2.8537464602995
1-0061	Indo-Oceanic	antisense_ctpB_712_from_start	2.8537464602995
1-0064	East-Asian	antisense_ctpB_712_from_start	2.8537464602995
1-0066	East-Asian	antisense_ctpB_712_from_start	2.78054933060282
1-0069	East-Asian	antisense_ctpB_712_from_start	2.83879135948971
1-0071	East-Asian	antisense_ctpB_712_from_start	2.8537464602995
1-0084	East-Asian	antisense_ctpB_712_from_start	2.16539451653314
1-0102	East-Asian	antisense_ctpB_712_from_start	2.8537464602995
1-0107	East-African-Indian	antisense_ctpB_712_from_start	2.8537464602995
1-0110	East-Asian	antisense_ctpB_712_from_start	2.8537464602995
1-0112	East-Asian	antisense_ctpB_712_from_start	2.8537464602995
1-0116	East-Asian	antisense_ctpB_712_from_start	2.8537464602995
1-0123	East-Asian	antisense_ctpB_712_from_start	2.8537464602995
1-0137	East-Asian	antisense_ctpB_712_from_start	2.8537464602995
1-0149	East-Asian	antisense_ctpB_712_from_start	2.80674379433858
1-0150	East-Asian	antisense_ctpB_712_from_start	2.8537464602995
1-0153	East-Asian	antisense_ctpB_712_from_start	2.8537464602995
1-0156	Euro-American	antisense_ctpB_712_from_start	0.123160372069132
2-0013	East-Asian	antisense_ctpB_712_from_start	2.8537464602995
2-0021	Euro-American	antisense_ctpB_712_from_start	2.81218612489609
2-0022	Euro-American	antisense_ctpB_712_from_start	2.8537464602995
2-0023	Euro-American	antisense_ctpB_712_from_start	2.8537464602995
2-0028	Euro-American	antisense_ctpB_712_from_start	2.8537464602995
2-0029	Euro-American	antisense_ctpB_712_from_start	2.78159441011364
2-0034	East-Asian	antisense_ctpB_712_from_start	2.8537464602995
2-0043-unknown	Euro-American	antisense_ctpB_712_from_start	2.63688856658529
2-0046	Euro-American	antisense_ctpB_712_from_start	2.8537464602995
2-0052	East-Asian	antisense_ctpB_712_from_start	2.8537464602995
2-0068	East-Asian	antisense_ctpB_712_from_start	2.8537464602995
2-0111	Euro-American	antisense_ctpB_712_from_start	2.8537464602995
3-0059	Euro-American	antisense_ctpB_712_from_start	2.8537464602995
3-0090	Indo-Oceanic	antisense_ctpB_712_from_start	0.0722657880404946
3-0096	Indo-Oceanic	antisense_ctpB_712_from_start	2.73288982166301
3-0124	Indo-Oceanic	antisense_ctpB_712_from_start	2.8414151800677
4-0012	Euro-American	antisense_ctpB_712_from_start	2.84584834365371
4-0062	East-Asian	antisense_ctpB_712_from_start	2.8537464602995
4-0073	Euro-American	antisense_ctpB_712_from_start	2.8537464602995
4-0077	East-Asian	antisense_ctpB_712_from_start	2.78170646159249
4-0087	Euro-American	antisense_ctpB_712_from_start	2.79991272154023
4-0096	East-Asian	antisense_ctpB_712_from_start	2.8537464602995
N0054	East-African-Indian	antisense_ctpB_712_from_start	2.8537464602995
N0091	M. africanum	antisense_ctpB_712_from_start	2.59603764044518
N0153	Indo-Oceanic	antisense_ctpB_712_from_start	2.8537464602995
N0157	Indo-Oceanic	antisense_ctpB_712_from_start	0.000838212706622071
N1063	M. africanum	antisense_ctpB_712_from_start	2.8537464602995
N1176	M. africanum	antisense_ctpB_712_from_start	2.8537464602995
N1216	Euro-American	antisense_ctpB_712_from_start	2.8537464602995
SEA00042	Euro-American	antisense_ctpB_712_from_start	2.8537464602995
SEA06535	Euro-American	antisense_ctpB_712_from_start	0.858888561094334
SEA07010354	East-African-Indian	antisense_ctpB_712_from_start	2.8537464602995
SEA07020250	Euro-American	antisense_ctpB_712_from_start	2.43793721421321
SEA08151	Indo-Oceanic	antisense_ctpB_712_from_start	2.8537464602995
SEA09020048	Euro-American	antisense_ctpB_712_from_start	2.70103061641849
SEA09167	Euro-American	antisense_ctpB_712_from_start	2.82011575920675
SEA11020038	Euro-American	antisense_ctpB_712_from_start	0.297394450597571
SEA11020057	Euro-American	antisense_ctpB_712_from_start	2.80965589387684
SEA11020068	Euro-American	antisense_ctpB_712_from_start	2.8537464602995
SEA11020092	Euro-American	antisense_ctpB_712_from_start	0
SEA11278	Lineage 7	antisense_ctpB_712_from_start	2.8537464602995
SEA12126	Indo-Oceanic	antisense_ctpB_712_from_start	2.8537464602995
SEA12202	Indo-Oceanic	antisense_ctpB_712_from_start	2.68471160533334
SEA12334	Indo-Oceanic	antisense_ctpB_712_from_start	2.8537464602995
SEA13111	Indo-Oceanic	antisense_ctpB_712_from_start	2.8537464602995
SEA14117	East-Asian	antisense_ctpB_712_from_start	2.8537464602995
SEA14333	Indo-Oceanic	antisense_ctpB_712_from_start	2.8537464602995
SEA15228	Indo-Oceanic	antisense_ctpB_712_from_start	2.8537464602995
SEA15229	Indo-Oceanic	antisense_ctpB_712_from_start	2.8537464602995
SEA15230	Indo-Oceanic	antisense_ctpB_712_from_start	2.82146274750875
SEA17020023	Indo-Oceanic	antisense_ctpB_712_from_start	0.120491195233195
SEA17020024	Indo-Oceanic	antisense_ctpB_712_from_start	0
SEA17020028	East-Asian	antisense_ctpB_712_from_start	2.8537464602995
SEA17020030	Euro-American	antisense_ctpB_712_from_start	2.85085883737935
1-0006	East-Asian	antisense_ctpI_364_from_start	2.13760339844806
1-0009	East-Asian	antisense_ctpI_364_from_start	2.37945894004
1-0013	East-Asian	antisense_ctpI_364_from_start	2.2281822131871
1-0017	East-Asian	antisense_ctpI_364_from_start	2.44406771031068
1-0021	East-African-Indian	antisense_ctpI_364_from_start	2.71833245612178
1-0028	East-Asian	antisense_ctpI_364_from_start	2.53472162643877
1-0030	Indo-Oceanic	antisense_ctpI_364_from_start	2.51116903703318
1-0031	East-Asian	antisense_ctpI_364_from_start	2.50334143089252
1-0036	Euro-American	antisense_ctpI_364_from_start	2.68771953424755
1-0039	East-Asian	antisense_ctpI_364_from_start	2.25885810653588
1-0044	Euro-American	antisense_ctpI_364_from_start	0
1-0045	East-Asian	antisense_ctpI_364_from_start	2.39921496369741
1-0047	East-African-Indian	antisense_ctpI_364_from_start	2.66018575070964
1-0054	East-Asian	antisense_ctpI_364_from_start	2.4228918549121
1-0056	East-Asian	antisense_ctpI_364_from_start	2.50368775321211
1-0061	Indo-Oceanic	antisense_ctpI_364_from_start	2.61609977316932
1-0064	East-Asian	antisense_ctpI_364_from_start	1.90591980723398
1-0066	East-Asian	antisense_ctpI_364_from_start	2.22985055013131
1-0069	East-Asian	antisense_ctpI_364_from_start	2.29407900500347
1-0071	East-Asian	antisense_ctpI_364_from_start	2.43792433799661
1-0084	East-Asian	antisense_ctpI_364_from_start	2.59781051918079
1-0102	East-Asian	antisense_ctpI_364_from_start	2.58258857061296
1-0107	East-African-Indian	antisense_ctpI_364_from_start	2.219379570046
1-0110	East-Asian	antisense_ctpI_364_from_start	2.66126359577543
1-0112	East-Asian	antisense_ctpI_364_from_start	2.34960649192103
1-0116	East-Asian	antisense_ctpI_364_from_start	2.15666156038727
1-0123	East-Asian	antisense_ctpI_364_from_start	2.82382724673922
1-0137	East-Asian	antisense_ctpI_364_from_start	2.49935673715366
1-0149	East-Asian	antisense_ctpI_364_from_start	2.24787992275838
1-0150	East-Asian	antisense_ctpI_364_from_start	2.57100873159956
1-0153	East-Asian	antisense_ctpI_364_from_start	2.1556224401208
1-0156	Euro-American	antisense_ctpI_364_from_start	0.710045184921317
2-0013	East-Asian	antisense_ctpI_364_from_start	2.3481642413884
2-0021	Euro-American	antisense_ctpI_364_from_start	2.23327000024185
2-0022	Euro-American	antisense_ctpI_364_from_start	2.45014520498644
2-0023	Euro-American	antisense_ctpI_364_from_start	2.50338497504342
2-0028	Euro-American	antisense_ctpI_364_from_start	2.25422869474692
2-0029	Euro-American	antisense_ctpI_364_from_start	2.56951038977246
2-0034	East-Asian	antisense_ctpI_364_from_start	2.47771662062454
2-0043-unknown	Euro-American	antisense_ctpI_364_from_start	2.42808052716358
2-0046	Euro-American	antisense_ctpI_364_from_start	2.30686099109052
2-0052	East-Asian	antisense_ctpI_364_from_start	2.31121913984189
2-0068	East-Asian	antisense_ctpI_364_from_start	2.11957009951906
2-0111	Euro-American	antisense_ctpI_364_from_start	2.70363371201748
3-0059	Euro-American	antisense_ctpI_364_from_start	2.78279890584778
3-0090	Indo-Oceanic	antisense_ctpI_364_from_start	0.0466803778460217
3-0096	Indo-Oceanic	antisense_ctpI_364_from_start	2.36402250381709
3-0124	Indo-Oceanic	antisense_ctpI_364_from_start	2.70895269412639
4-0012	Euro-American	antisense_ctpI_364_from_start	2.11575110352598
4-0062	East-Asian	antisense_ctpI_364_from_start	2.16862914566924
4-0073	Euro-American	antisense_ctpI_364_from_start	2.69856521797578
4-0077	East-Asian	antisense_ctpI_364_from_start	2.48209721146251
4-0087	Euro-American	antisense_ctpI_364_from_start	2.33278671111293
4-0096	East-Asian	antisense_ctpI_364_from_start	2.43795761666724
N0054	East-African-Indian	antisense_ctpI_364_from_start	2.58988734741479
N0091	M. africanum	antisense_ctpI_364_from_start	2.33992420801232
N0153	Indo-Oceanic	antisense_ctpI_364_from_start	2.22329232269953
N0157	Indo-Oceanic	antisense_ctpI_364_from_start	0
N1063	M. africanum	antisense_ctpI_364_from_start	2.63340132046302
N1176	M. africanum	antisense_ctpI_364_from_start	2.3792399224591
N1216	Euro-American	antisense_ctpI_364_from_start	2.29877968882861
SEA00042	Euro-American	antisense_ctpI_364_from_start	2.72143355734418
SEA06535	Euro-American	antisense_ctpI_364_from_start	0.563916148231489
SEA07010354	East-African-Indian	antisense_ctpI_364_from_start	2.37945841224423
SEA07020250	Euro-American	antisense_ctpI_364_from_start	2.61192316015975
SEA08151	Indo-Oceanic	antisense_ctpI_364_from_start	2.63344127116357
SEA09020048	Euro-American	antisense_ctpI_364_from_start	2.39097060357169
SEA09167	Euro-American	antisense_ctpI_364_from_start	1.9554896451643
SEA11020038	Euro-American	antisense_ctpI_364_from_start	0.257317011222236
SEA11020057	Euro-American	antisense_ctpI_364_from_start	2.38521789537603
SEA11020068	Euro-American	antisense_ctpI_364_from_start	2.10746629404225
SEA11020092	Euro-American	antisense_ctpI_364_from_start	0.391672335984953
SEA11278	Lineage 7	antisense_ctpI_364_from_start	2.25200396145188
SEA12126	Indo-Oceanic	antisense_ctpI_364_from_start	2.14270223254966
SEA12202	Indo-Oceanic	antisense_ctpI_364_from_start	2.27507418869126
SEA12334	Indo-Oceanic	antisense_ctpI_364_from_start	2.12914048225892
SEA13111	Indo-Oceanic	antisense_ctpI_364_from_start	2.11711877136212
SEA14117	East-Asian	antisense_ctpI_364_from_start	2.02992747350358
SEA14333	Indo-Oceanic	antisense_ctpI_364_from_start	2.27462172208158
SEA15228	Indo-Oceanic	antisense_ctpI_364_from_start	2.46223618036711
SEA15229	Indo-Oceanic	antisense_ctpI_364_from_start	2.51815778605291
SEA15230	Indo-Oceanic	antisense_ctpI_364_from_start	2.34283284009154
SEA17020023	Indo-Oceanic	antisense_ctpI_364_from_start	0.276370168186323
SEA17020024	Indo-Oceanic	antisense_ctpI_364_from_start	0.471773643241255
SEA17020028	East-Asian	antisense_ctpI_364_from_start	2.52586797354835
SEA17020030	Euro-American	antisense_ctpI_364_from_start	2.50065230353337
1-0006	East-Asian	sense_ctpI_64_from_start	2.8537464602995
1-0009	East-Asian	sense_ctpI_64_from_start	2.8537464602995
1-0013	East-Asian	sense_ctpI_64_from_start	2.8537464602995
1-0017	East-Asian	sense_ctpI_64_from_start	2.8537464602995
1-0021	East-African-Indian	sense_ctpI_64_from_start	2.63944775105634
1-0028	East-Asian	sense_ctpI_64_from_start	2.8537464602995
1-0030	Indo-Oceanic	sense_ctpI_64_from_start	2.8537464602995
1-0031	East-Asian	sense_ctpI_64_from_start	2.8537464602995
1-0036	Euro-American	sense_ctpI_64_from_start	2.45872030115692
1-0039	East-Asian	sense_ctpI_64_from_start	2.72915924165939
1-0044	Euro-American	sense_ctpI_64_from_start	0
1-0045	East-Asian	sense_ctpI_64_from_start	2.41724368579934
1-0047	East-African-Indian	sense_ctpI_64_from_start	2.8537464602995
1-0054	East-Asian	sense_ctpI_64_from_start	2.77839098250951
1-0056	East-Asian	sense_ctpI_64_from_start	2.8537464602995
1-0061	Indo-Oceanic	sense_ctpI_64_from_start	2.8537464602995
1-0064	East-Asian	sense_ctpI_64_from_start	2.5929134181491
1-0066	East-Asian	sense_ctpI_64_from_start	2.76909231527098
1-0069	East-Asian	sense_ctpI_64_from_start	2.85113307374754
1-0071	East-Asian	sense_ctpI_64_from_start	2.78326858104183
1-0084	East-Asian	sense_ctpI_64_from_start	2.43444323376064
1-0102	East-Asian	sense_ctpI_64_from_start	2.66130272273116
1-0107	East-African-Indian	sense_ctpI_64_from_start	2.8537464602995
1-0110	East-Asian	sense_ctpI_64_from_start	2.8537464602995
1-0112	East-Asian	sense_ctpI_64_from_start	2.83819862613147
1-0116	East-Asian	sense_ctpI_64_from_start	2.8537464602995
1-0123	East-Asian	sense_ctpI_64_from_start	2.52326078440882
1-0137	East-Asian	sense_ctpI_64_from_start	2.8537464602995
1-0149	East-Asian	sense_ctpI_64_from_start	2.8464080119121
1-0150	East-Asian	sense_ctpI_64_from_start	2.04801198418479
1-0153	East-Asian	sense_ctpI_64_from_start	2.8537464602995
1-0156	Euro-American	sense_ctpI_64_from_start	0
2-0013	East-Asian	sense_ctpI_64_from_start	2.8105735598256
2-0021	Euro-American	sense_ctpI_64_from_start	2.72747116124684
2-0022	Euro-American	sense_ctpI_64_from_start	2.80481370870395
2-0023	Euro-American	sense_ctpI_64_from_start	2.44733791900441
2-0028	Euro-American	sense_ctpI_64_from_start	2.71973756942127
2-0029	Euro-American	sense_ctpI_64_from_start	2.66585235652207
2-0034	East-Asian	sense_ctpI_64_from_start	2.60970368031759
2-0043-unknown	Euro-American	sense_ctpI_64_from_start	2.8537464602995
2-0046	Euro-American	sense_ctpI_64_from_start	2.58032759702123
2-0052	East-Asian	sense_ctpI_64_from_start	2.8537464602995
2-0068	East-Asian	sense_ctpI_64_from_start	2.8537464602995
2-0111	Euro-American	sense_ctpI_64_from_start	2.7697840227285
3-0059	Euro-American	sense_ctpI_64_from_start	2.8537464602995
3-0090	Indo-Oceanic	sense_ctpI_64_from_start	0
3-0096	Indo-Oceanic	sense_ctpI_64_from_start	2.80930753038758
3-0124	Indo-Oceanic	sense_ctpI_64_from_start	2.58495803813578
4-0012	Euro-American	sense_ctpI_64_from_start	2.61375030373309
4-0062	East-Asian	sense_ctpI_64_from_start	2.8537464602995
4-0073	Euro-American	sense_ctpI_64_from_start	2.8537464602995
4-0077	East-Asian	sense_ctpI_64_from_start	2.8537464602995
4-0087	Euro-American	sense_ctpI_64_from_start	2.8537464602995
4-0096	East-Asian	sense_ctpI_64_from_start	2.8537464602995
N0054	East-African-Indian	sense_ctpI_64_from_start	2.8537464602995
N0091	M. africanum	sense_ctpI_64_from_start	2.8537464602995
N0153	Indo-Oceanic	sense_ctpI_64_from_start	2.8537464602995
N0157	Indo-Oceanic	sense_ctpI_64_from_start	0
N1063	M. africanum	sense_ctpI_64_from_start	2.8537464602995
N1176	M. africanum	sense_ctpI_64_from_start	2.8537464602995
N1216	Euro-American	sense_ctpI_64_from_start	2.8537464602995
SEA00042	Euro-American	sense_ctpI_64_from_start	2.74345643265209
SEA06535	Euro-American	sense_ctpI_64_from_start	0.47701792575069
SEA07010354	East-African-Indian	sense_ctpI_64_from_start	2.72591854643478
SEA07020250	Euro-American	sense_ctpI_64_from_start	2.8537464602995
SEA08151	Indo-Oceanic	sense_ctpI_64_from_start	2.83771422137241
SEA09020048	Euro-American	sense_ctpI_64_from_start	2.77608132167975
SEA09167	Euro-American	sense_ctpI_64_from_start	2.76728118866143
SEA11020038	Euro-American	sense_ctpI_64_from_start	0
SEA11020057	Euro-American	sense_ctpI_64_from_start	2.8537464602995
SEA11020068	Euro-American	sense_ctpI_64_from_start	2.37468364000812
SEA11020092	Euro-American	sense_ctpI_64_from_start	0
SEA11278	Lineage 7	sense_ctpI_64_from_start	2.59449569793886
SEA12126	Indo-Oceanic	sense_ctpI_64_from_start	2.8537464602995
SEA12202	Indo-Oceanic	sense_ctpI_64_from_start	2.51612900456838
SEA12334	Indo-Oceanic	sense_ctpI_64_from_start	2.8537464602995
SEA13111	Indo-Oceanic	sense_ctpI_64_from_start	2.8537464602995
SEA14117	East-Asian	sense_ctpI_64_from_start	2.8537464602995
SEA14333	Indo-Oceanic	sense_ctpI_64_from_start	2.8537464602995
SEA15228	Indo-Oceanic	sense_ctpI_64_from_start	2.80153528807025
SEA15229	Indo-Oceanic	sense_ctpI_64_from_start	2.8537464602995
SEA15230	Indo-Oceanic	sense_ctpI_64_from_start	2.8537464602995
SEA17020023	Indo-Oceanic	sense_ctpI_64_from_start	0
SEA17020024	Indo-Oceanic	sense_ctpI_64_from_start	0.0200931708193487
SEA17020028	East-Asian	sense_ctpI_64_from_start	2.77239188548123
SEA17020030	Euro-American	sense_ctpI_64_from_start	2.694337349112
1-0006	East-Asian	antisense_Rv0108c_102_from_start	2.8537464602995
1-0009	East-Asian	antisense_Rv0108c_102_from_start	2.81300732264206
1-0013	East-Asian	antisense_Rv0108c_102_from_start	2.75443049164159
1-0017	East-Asian	antisense_Rv0108c_102_from_start	2.8537464602995
1-0028	East-Asian	antisense_Rv0108c_102_from_start	2.53551526084453
1-0030	Indo-Oceanic	antisense_Rv0108c_102_from_start	2.52591988166421
1-0031	East-Asian	antisense_Rv0108c_102_from_start	2.8537464602995
1-0036	Euro-American	antisense_Rv0108c_102_from_start	2.56559830255559
1-0039	East-Asian	antisense_Rv0108c_102_from_start	2.67373932622394
1-0044	Euro-American	antisense_Rv0108c_102_from_start	0
1-0045	East-Asian	antisense_Rv0108c_102_from_start	2.8537464602995
1-0047	East-African-Indian	antisense_Rv0108c_102_from_start	2.8537464602995
1-0054	East-Asian	antisense_Rv0108c_102_from_start	2.82494686104023
1-0056	East-Asian	antisense_Rv0108c_102_from_start	2.8537464602995
1-0061	Indo-Oceanic	antisense_Rv0108c_102_from_start	2.8537464602995
1-0064	East-Asian	antisense_Rv0108c_102_from_start	2.76683553273152
1-0066	East-Asian	antisense_Rv0108c_102_from_start	2.8537464602995
1-0069	East-Asian	antisense_Rv0108c_102_from_start	2.8537464602995
1-0071	East-Asian	antisense_Rv0108c_102_from_start	2.56940725757099
1-0084	East-Asian	antisense_Rv0108c_102_from_start	2.85294458834306
1-0102	East-Asian	antisense_Rv0108c_102_from_start	2.5662671979275
1-0107	East-African-Indian	antisense_Rv0108c_102_from_start	2.8537464602995
1-0110	East-Asian	antisense_Rv0108c_102_from_start	2.8537464602995
1-0112	East-Asian	antisense_Rv0108c_102_from_start	2.8537464602995
1-0116	East-Asian	antisense_Rv0108c_102_from_start	2.63368368732224
1-0123	East-Asian	antisense_Rv0108c_102_from_start	2.8537464602995
1-0137	East-Asian	antisense_Rv0108c_102_from_start	2.8537464602995
1-0149	East-Asian	antisense_Rv0108c_102_from_start	2.83573714195555
1-0150	East-Asian	antisense_Rv0108c_102_from_start	2.8537464602995
1-0153	East-Asian	antisense_Rv0108c_102_from_start	2.8537464602995
1-0156	Euro-American	antisense_Rv0108c_102_from_start	0
2-0013	East-Asian	antisense_Rv0108c_102_from_start	2.8537464602995
2-0021	Euro-American	antisense_Rv0108c_102_from_start	2.59904744059386
2-0022	Euro-American	antisense_Rv0108c_102_from_start	2.8537464602995
2-0023	Euro-American	antisense_Rv0108c_102_from_start	2.83469878739385
2-0028	Euro-American	antisense_Rv0108c_102_from_start	2.5585847465904
2-0029	Euro-American	antisense_Rv0108c_102_from_start	2.8537464602995
2-0034	East-Asian	antisense_Rv0108c_102_from_start	2.71357885703445
2-0046	Euro-American	antisense_Rv0108c_102_from_start	2.8537464602995
2-0052	East-Asian	antisense_Rv0108c_102_from_start	2.66760692100692
2-0068	East-Asian	antisense_Rv0108c_102_from_start	2.76358822913354
2-0111	Euro-American	antisense_Rv0108c_102_from_start	2.8537464602995
3-0059	Euro-American	antisense_Rv0108c_102_from_start	2.73128904997236
3-0090	Indo-Oceanic	antisense_Rv0108c_102_from_start	0
3-0096	Indo-Oceanic	antisense_Rv0108c_102_from_start	2.8537464602995
3-0124	Indo-Oceanic	antisense_Rv0108c_102_from_start	2.8537464602995
4-0012	Euro-American	antisense_Rv0108c_102_from_start	2.82672024333496
4-0062	East-Asian	antisense_Rv0108c_102_from_start	2.8537464602995
4-0073	Euro-American	antisense_Rv0108c_102_from_start	2.8537464602995
4-0077	East-Asian	antisense_Rv0108c_102_from_start	2.75709562526564
4-0096	East-Asian	antisense_Rv0108c_102_from_start	2.8537464602995
N0054	East-African-Indian	antisense_Rv0108c_102_from_start	2.8537464602995
N0091	M. africanum	antisense_Rv0108c_102_from_start	2.8537464602995
N0153	Indo-Oceanic	antisense_Rv0108c_102_from_start	2.72925562313132
N0157	Indo-Oceanic	antisense_Rv0108c_102_from_start	0
N1063	M. africanum	antisense_Rv0108c_102_from_start	2.8537464602995
N1176	M. africanum	antisense_Rv0108c_102_from_start	2.8537464602995
N1216	Euro-American	antisense_Rv0108c_102_from_start	2.8537464602995
SEA00042	Euro-American	antisense_Rv0108c_102_from_start	2.57573204193409
SEA07010354	East-African-Indian	antisense_Rv0108c_102_from_start	2.8537464602995
SEA07020250	Euro-American	antisense_Rv0108c_102_from_start	2.8537464602995
SEA08151	Indo-Oceanic	antisense_Rv0108c_102_from_start	2.76900627047353
SEA09020048	Euro-American	antisense_Rv0108c_102_from_start	2.82644853643512
SEA09167	Euro-American	antisense_Rv0108c_102_from_start	2.8537464602995
SEA11020038	Euro-American	antisense_Rv0108c_102_from_start	0.0877094693567113
SEA11020057	Euro-American	antisense_Rv0108c_102_from_start	2.78862771308178
SEA11020092	Euro-American	antisense_Rv0108c_102_from_start	0
SEA11278	Lineage 7	antisense_Rv0108c_102_from_start	2.83049903841473
SEA12126	Indo-Oceanic	antisense_Rv0108c_102_from_start	2.47105399538602
SEA12202	Indo-Oceanic	antisense_Rv0108c_102_from_start	2.77358569772024
SEA12334	Indo-Oceanic	antisense_Rv0108c_102_from_start	2.78029031395481
SEA13111	Indo-Oceanic	antisense_Rv0108c_102_from_start	2.84973109031511
SEA14117	East-Asian	antisense_Rv0108c_102_from_start	2.78523564779159
SEA14333	Indo-Oceanic	antisense_Rv0108c_102_from_start	2.8537464602995
SEA15228	Indo-Oceanic	antisense_Rv0108c_102_from_start	2.8537464602995
SEA15229	Indo-Oceanic	antisense_Rv0108c_102_from_start	2.8537464602995
SEA15230	Indo-Oceanic	antisense_Rv0108c_102_from_start	2.8537464602995
SEA17020023	Indo-Oceanic	antisense_Rv0108c_102_from_start	0
SEA17020024	Indo-Oceanic	antisense_Rv0108c_102_from_start	0.0780064742618636
SEA17020028	East-Asian	antisense_Rv0108c_102_from_start	2.84174147719794
SEA17020030	Euro-American	antisense_Rv0108c_102_from_start	2.8537464602995
1-0006	East-Asian	65_up_of_Rv0108c	2.8537464602995
1-0009	East-Asian	65_up_of_Rv0108c	2.6808589720027
1-0013	East-Asian	65_up_of_Rv0108c	2.759974404917
1-0017	East-Asian	65_up_of_Rv0108c	2.8537464602995
1-0021	East-African-Indian	65_up_of_Rv0108c	2.14528580996029
1-0028	East-Asian	65_up_of_Rv0108c	2.77678780816152
1-0030	Indo-Oceanic	65_up_of_Rv0108c	2.8537464602995
1-0031	East-Asian	65_up_of_Rv0108c	2.76113447142763
1-0036	Euro-American	65_up_of_Rv0108c	2.8537464602995
1-0039	East-Asian	65_up_of_Rv0108c	2.8537464602995
1-0044	Euro-American	65_up_of_Rv0108c	0
1-0045	East-Asian	65_up_of_Rv0108c	2.8537464602995
1-0047	East-African-Indian	65_up_of_Rv0108c	2.75855303273504
1-0054	East-Asian	65_up_of_Rv0108c	2.75240719353038
1-0056	East-Asian	65_up_of_Rv0108c	2.8537464602995
1-0061	Indo-Oceanic	65_up_of_Rv0108c	2.8537464602995
1-0064	East-Asian	65_up_of_Rv0108c	2.82637213598664
1-0066	East-Asian	65_up_of_Rv0108c	2.8537464602995
1-0069	East-Asian	65_up_of_Rv0108c	2.72569849781519
1-0071	East-Asian	65_up_of_Rv0108c	2.8537464602995
1-0084	East-Asian	65_up_of_Rv0108c	2.6798653427409
1-0102	East-Asian	65_up_of_Rv0108c	2.8537464602995
1-0107	East-African-Indian	65_up_of_Rv0108c	2.8537464602995
1-0110	East-Asian	65_up_of_Rv0108c	2.8537464602995
1-0112	East-Asian	65_up_of_Rv0108c	2.8537464602995
1-0116	East-Asian	65_up_of_Rv0108c	2.83863628658703
1-0123	East-Asian	65_up_of_Rv0108c	2.8537464602995
1-0137	East-Asian	65_up_of_Rv0108c	2.8537464602995
1-0149	East-Asian	65_up_of_Rv0108c	2.8537464602995
1-0150	East-Asian	65_up_of_Rv0108c	2.29219239265503
1-0153	East-Asian	65_up_of_Rv0108c	2.69999981020133
1-0156	Euro-American	65_up_of_Rv0108c	0
2-0013	East-Asian	65_up_of_Rv0108c	2.8537464602995
2-0021	Euro-American	65_up_of_Rv0108c	2.8537464602995
2-0022	Euro-American	65_up_of_Rv0108c	2.8537464602995
2-0023	Euro-American	65_up_of_Rv0108c	2.8537464602995
2-0028	Euro-American	65_up_of_Rv0108c	2.8537464602995
2-0029	Euro-American	65_up_of_Rv0108c	2.8537464602995
2-0034	East-Asian	65_up_of_Rv0108c	2.67142896015432
2-0043-unknown	Euro-American	65_up_of_Rv0108c	2.69709386291825
2-0046	Euro-American	65_up_of_Rv0108c	2.57314105642797
2-0052	East-Asian	65_up_of_Rv0108c	2.8537464602995
2-0068	East-Asian	65_up_of_Rv0108c	2.8537464602995
2-0111	Euro-American	65_up_of_Rv0108c	2.4155717161457
3-0059	Euro-American	65_up_of_Rv0108c	2.8537464602995
3-0090	Indo-Oceanic	65_up_of_Rv0108c	0
3-0096	Indo-Oceanic	65_up_of_Rv0108c	2.8537464602995
3-0124	Indo-Oceanic	65_up_of_Rv0108c	2.46061980726172
4-0012	Euro-American	65_up_of_Rv0108c	2.8537464602995
4-0062	East-Asian	65_up_of_Rv0108c	2.8537464602995
4-0073	Euro-American	65_up_of_Rv0108c	2.8537464602995
4-0077	East-Asian	65_up_of_Rv0108c	2.8537464602995
4-0087	Euro-American	65_up_of_Rv0108c	2.73163878265084
4-0096	East-Asian	65_up_of_Rv0108c	2.8537464602995
N0054	East-African-Indian	65_up_of_Rv0108c	2.8537464602995
N0091	M. africanum	65_up_of_Rv0108c	2.8537464602995
N0153	Indo-Oceanic	65_up_of_Rv0108c	2.8537464602995
N0157	Indo-Oceanic	65_up_of_Rv0108c	0
N1063	M. africanum	65_up_of_Rv0108c	2.8537464602995
N1176	M. africanum	65_up_of_Rv0108c	2.8537464602995
N1216	Euro-American	65_up_of_Rv0108c	2.8537464602995
SEA00042	Euro-American	65_up_of_Rv0108c	2.80287634513905
SEA06535	Euro-American	65_up_of_Rv0108c	0.870299767802831
SEA07010354	East-African-Indian	65_up_of_Rv0108c	2.8537464602995
SEA07020250	Euro-American	65_up_of_Rv0108c	2.8537464602995
SEA08151	Indo-Oceanic	65_up_of_Rv0108c	2.48556318465558
SEA09020048	Euro-American	65_up_of_Rv0108c	2.8537464602995
SEA09167	Euro-American	65_up_of_Rv0108c	2.8537464602995
SEA11020038	Euro-American	65_up_of_Rv0108c	0.00390229562749606
SEA11020057	Euro-American	65_up_of_Rv0108c	2.8537464602995
SEA11020068	Euro-American	65_up_of_Rv0108c	2.8537464602995
SEA11020092	Euro-American	65_up_of_Rv0108c	0.920952472500052
SEA12126	Indo-Oceanic	65_up_of_Rv0108c	2.8537464602995
SEA12202	Indo-Oceanic	65_up_of_Rv0108c	2.6201967529228
SEA12334	Indo-Oceanic	65_up_of_Rv0108c	2.8045797314569
SEA13111	Indo-Oceanic	65_up_of_Rv0108c	2.77823061100907
SEA14117	East-Asian	65_up_of_Rv0108c	2.8537464602995
SEA14333	Indo-Oceanic	65_up_of_Rv0108c	2.8537464602995
SEA15228	Indo-Oceanic	65_up_of_Rv0108c	2.8537464602995
SEA15229	Indo-Oceanic	65_up_of_Rv0108c	2.8537464602995
SEA15230	Indo-Oceanic	65_up_of_Rv0108c	2.82166918594953
SEA17020023	Indo-Oceanic	65_up_of_Rv0108c	0.51700860654124
SEA17020024	Indo-Oceanic	65_up_of_Rv0108c	0.116261993271865
SEA17020028	East-Asian	65_up_of_Rv0108c	2.77773164670659
SEA17020030	Euro-American	65_up_of_Rv0108c	2.4330302320429
1-0006	East-Asian	sense_oxyS_28_to_stop	2.8537464602995
1-0009	East-Asian	sense_oxyS_28_to_stop	2.8537464602995
1-0013	East-Asian	sense_oxyS_28_to_stop	2.8537464602995
1-0017	East-Asian	sense_oxyS_28_to_stop	2.8537464602995
1-0021	East-African-Indian	sense_oxyS_28_to_stop	2.8537464602995
1-0028	East-Asian	sense_oxyS_28_to_stop	2.8537464602995
1-0030	Indo-Oceanic	sense_oxyS_28_to_stop	2.8537464602995
1-0031	East-Asian	sense_oxyS_28_to_stop	2.8537464602995
1-0036	Euro-American	sense_oxyS_28_to_stop	2.8537464602995
1-0039	East-Asian	sense_oxyS_28_to_stop	2.8537464602995
1-0044	Euro-American	sense_oxyS_28_to_stop	0.199122629388665
1-0045	East-Asian	sense_oxyS_28_to_stop	2.8537464602995
1-0047	East-African-Indian	sense_oxyS_28_to_stop	2.8537464602995
1-0054	East-Asian	sense_oxyS_28_to_stop	2.8537464602995
1-0056	East-Asian	sense_oxyS_28_to_stop	2.8537464602995
1-0061	Indo-Oceanic	sense_oxyS_28_to_stop	2.8537464602995
1-0064	East-Asian	sense_oxyS_28_to_stop	2.8537464602995
1-0066	East-Asian	sense_oxyS_28_to_stop	2.8537464602995
1-0069	East-Asian	sense_oxyS_28_to_stop	2.8537464602995
1-0071	East-Asian	sense_oxyS_28_to_stop	2.8537464602995
1-0084	East-Asian	sense_oxyS_28_to_stop	2.8537464602995
1-0102	East-Asian	sense_oxyS_28_to_stop	2.8537464602995
1-0107	East-African-Indian	sense_oxyS_28_to_stop	2.8537464602995
1-0110	East-Asian	sense_oxyS_28_to_stop	2.8537464602995
1-0112	East-Asian	sense_oxyS_28_to_stop	2.8537464602995
1-0116	East-Asian	sense_oxyS_28_to_stop	2.8537464602995
1-0123	East-Asian	sense_oxyS_28_to_stop	2.8537464602995
1-0137	East-Asian	sense_oxyS_28_to_stop	2.8537464602995
1-0149	East-Asian	sense_oxyS_28_to_stop	2.8537464602995
1-0150	East-Asian	sense_oxyS_28_to_stop	2.8537464602995
1-0153	East-Asian	sense_oxyS_28_to_stop	2.8537464602995
1-0156	Euro-American	sense_oxyS_28_to_stop	0.0881134249699314
2-0013	East-Asian	sense_oxyS_28_to_stop	2.8537464602995
2-0021	Euro-American	sense_oxyS_28_to_stop	2.8537464602995
2-0022	Euro-American	sense_oxyS_28_to_stop	2.8537464602995
2-0023	Euro-American	sense_oxyS_28_to_stop	2.8537464602995
2-0028	Euro-American	sense_oxyS_28_to_stop	2.77518772901228
2-0029	Euro-American	sense_oxyS_28_to_stop	2.7205806691857
2-0034	East-Asian	sense_oxyS_28_to_stop	2.8537464602995
2-0043-unknown	Euro-American	sense_oxyS_28_to_stop	2.8537464602995
2-0046	Euro-American	sense_oxyS_28_to_stop	2.8537464602995
2-0052	East-Asian	sense_oxyS_28_to_stop	2.8537464602995
2-0068	East-Asian	sense_oxyS_28_to_stop	2.8537464602995
2-0111	Euro-American	sense_oxyS_28_to_stop	2.8537464602995
3-0059	Euro-American	sense_oxyS_28_to_stop	2.8537464602995
3-0090	Indo-Oceanic	sense_oxyS_28_to_stop	0
3-0096	Indo-Oceanic	sense_oxyS_28_to_stop	2.8537464602995
3-0124	Indo-Oceanic	sense_oxyS_28_to_stop	2.8537464602995
4-0012	Euro-American	sense_oxyS_28_to_stop	2.8537464602995
4-0062	East-Asian	sense_oxyS_28_to_stop	2.8537464602995
4-0073	Euro-American	sense_oxyS_28_to_stop	2.8537464602995
4-0077	East-Asian	sense_oxyS_28_to_stop	2.8537464602995
4-0087	Euro-American	sense_oxyS_28_to_stop	2.8537464602995
4-0096	East-Asian	sense_oxyS_28_to_stop	2.8537464602995
N0054	East-African-Indian	sense_oxyS_28_to_stop	2.8537464602995
N0091	M. africanum	sense_oxyS_28_to_stop	2.8537464602995
N0153	Indo-Oceanic	sense_oxyS_28_to_stop	2.8537464602995
N0157	Indo-Oceanic	sense_oxyS_28_to_stop	0.246832715241952
N1063	M. africanum	sense_oxyS_28_to_stop	2.8537464602995
N1176	M. africanum	sense_oxyS_28_to_stop	2.8537464602995
N1216	Euro-American	sense_oxyS_28_to_stop	2.8537464602995
SEA00042	Euro-American	sense_oxyS_28_to_stop	2.8537464602995
SEA06535	Euro-American	sense_oxyS_28_to_stop	1.65438773935417
SEA07010354	East-African-Indian	sense_oxyS_28_to_stop	2.8537464602995
SEA07020250	Euro-American	sense_oxyS_28_to_stop	2.8537464602995
SEA08151	Indo-Oceanic	sense_oxyS_28_to_stop	2.8537464602995
SEA09020048	Euro-American	sense_oxyS_28_to_stop	2.8537464602995
SEA09167	Euro-American	sense_oxyS_28_to_stop	2.8537464602995
SEA11020038	Euro-American	sense_oxyS_28_to_stop	0.609407076619851
SEA11020057	Euro-American	sense_oxyS_28_to_stop	2.8537464602995
SEA11020068	Euro-American	sense_oxyS_28_to_stop	2.8537464602995
SEA11020092	Euro-American	sense_oxyS_28_to_stop	0
SEA11278	Lineage 7	sense_oxyS_28_to_stop	2.8537464602995
SEA12126	Indo-Oceanic	sense_oxyS_28_to_stop	2.8537464602995
SEA12202	Indo-Oceanic	sense_oxyS_28_to_stop	2.8537464602995
SEA12334	Indo-Oceanic	sense_oxyS_28_to_stop	2.8537464602995
SEA13111	Indo-Oceanic	sense_oxyS_28_to_stop	2.8537464602995
SEA14117	East-Asian	sense_oxyS_28_to_stop	2.8537464602995
SEA14333	Indo-Oceanic	sense_oxyS_28_to_stop	2.83499572747347
SEA15228	Indo-Oceanic	sense_oxyS_28_to_stop	2.8537464602995
SEA15229	Indo-Oceanic	sense_oxyS_28_to_stop	2.8537464602995
SEA15230	Indo-Oceanic	sense_oxyS_28_to_stop	2.8537464602995
SEA17020023	Indo-Oceanic	sense_oxyS_28_to_stop	0.579679464786523
SEA17020024	Indo-Oceanic	sense_oxyS_28_to_stop	0.591055844035774
SEA17020028	East-Asian	sense_oxyS_28_to_stop	2.84926771443067
SEA17020030	Euro-American	sense_oxyS_28_to_stop	2.8537464602995
1-0006	East-Asian	antisense_cyp138_475_from_start	2.8537464602995
1-0009	East-Asian	antisense_cyp138_475_from_start	2.40890569315954
1-0013	East-Asian	antisense_cyp138_475_from_start	2.82285505053342
1-0017	East-Asian	antisense_cyp138_475_from_start	2.8537464602995
1-0021	East-African-Indian	antisense_cyp138_475_from_start	2.8537464602995
1-0028	East-Asian	antisense_cyp138_475_from_start	2.56457697296516
1-0030	Indo-Oceanic	antisense_cyp138_475_from_start	2.69562376347379
1-0031	East-Asian	antisense_cyp138_475_from_start	2.8537464602995
1-0036	Euro-American	antisense_cyp138_475_from_start	2.8537464602995
1-0039	East-Asian	antisense_cyp138_475_from_start	2.78361538111491
1-0044	Euro-American	antisense_cyp138_475_from_start	0
1-0045	East-Asian	antisense_cyp138_475_from_start	2.74610121783162
1-0047	East-African-Indian	antisense_cyp138_475_from_start	2.54746786233279
1-0054	East-Asian	antisense_cyp138_475_from_start	2.8537464602995
1-0056	East-Asian	antisense_cyp138_475_from_start	2.33111534079721
1-0061	Indo-Oceanic	antisense_cyp138_475_from_start	2.66468813501934
1-0064	East-Asian	antisense_cyp138_475_from_start	2.69157100078747
1-0066	East-Asian	antisense_cyp138_475_from_start	2.71339333324801
1-0069	East-Asian	antisense_cyp138_475_from_start	2.8537464602995
1-0071	East-Asian	antisense_cyp138_475_from_start	2.56967069134162
1-0084	East-Asian	antisense_cyp138_475_from_start	2.42990645316387
1-0102	East-Asian	antisense_cyp138_475_from_start	2.54749324894095
1-0107	East-African-Indian	antisense_cyp138_475_from_start	2.59538689740414
1-0110	East-Asian	antisense_cyp138_475_from_start	2.63339637308082
1-0112	East-Asian	antisense_cyp138_475_from_start	2.41121934362799
1-0116	East-Asian	antisense_cyp138_475_from_start	2.8537464602995
1-0123	East-Asian	antisense_cyp138_475_from_start	2.48518556686281
1-0137	East-Asian	antisense_cyp138_475_from_start	2.69156840814555
1-0149	East-Asian	antisense_cyp138_475_from_start	2.73734855842363
1-0150	East-Asian	antisense_cyp138_475_from_start	2.85110100172823
1-0153	East-Asian	antisense_cyp138_475_from_start	2.8537464602995
1-0156	Euro-American	antisense_cyp138_475_from_start	0
2-0013	East-Asian	antisense_cyp138_475_from_start	2.59090530811666
2-0021	Euro-American	antisense_cyp138_475_from_start	2.8537464602995
2-0022	Euro-American	antisense_cyp138_475_from_start	2.58775147015793
2-0023	Euro-American	antisense_cyp138_475_from_start	2.45006977939443
2-0028	Euro-American	antisense_cyp138_475_from_start	2.53391434113088
2-0029	Euro-American	antisense_cyp138_475_from_start	2.78877937170362
2-0034	East-Asian	antisense_cyp138_475_from_start	2.71269943302618
2-0043-unknown	Euro-American	antisense_cyp138_475_from_start	2.55798126839154
2-0046	Euro-American	antisense_cyp138_475_from_start	2.73138309066099
2-0052	East-Asian	antisense_cyp138_475_from_start	2.80270590108628
2-0068	East-Asian	antisense_cyp138_475_from_start	2.83888367532323
2-0111	Euro-American	antisense_cyp138_475_from_start	1.57285941271902
3-0059	Euro-American	antisense_cyp138_475_from_start	2.6705976704
3-0090	Indo-Oceanic	antisense_cyp138_475_from_start	0.827153290203963
3-0096	Indo-Oceanic	antisense_cyp138_475_from_start	2.79740258321774
3-0124	Indo-Oceanic	antisense_cyp138_475_from_start	2.59150545224715
4-0012	Euro-American	antisense_cyp138_475_from_start	2.62510731187046
4-0062	East-Asian	antisense_cyp138_475_from_start	2.75402876047975
4-0073	Euro-American	antisense_cyp138_475_from_start	2.50027071542893
4-0077	East-Asian	antisense_cyp138_475_from_start	2.8537464602995
4-0087	Euro-American	antisense_cyp138_475_from_start	2.68150409342978
4-0096	East-Asian	antisense_cyp138_475_from_start	2.8537464602995
N0054	East-African-Indian	antisense_cyp138_475_from_start	2.72294993048487
N0091	M. africanum	antisense_cyp138_475_from_start	2.8537464602995
N0153	Indo-Oceanic	antisense_cyp138_475_from_start	2.80633922820045
N0157	Indo-Oceanic	antisense_cyp138_475_from_start	0
N1063	M. africanum	antisense_cyp138_475_from_start	2.8378870920076
N1176	M. africanum	antisense_cyp138_475_from_start	2.47557000146367
N1216	Euro-American	antisense_cyp138_475_from_start	2.84622094733278
SEA00042	Euro-American	antisense_cyp138_475_from_start	2.58023421457811
SEA06535	Euro-American	antisense_cyp138_475_from_start	0
SEA07010354	East-African-Indian	antisense_cyp138_475_from_start	2.52472688369435
SEA07020250	Euro-American	antisense_cyp138_475_from_start	2.65626592330614
SEA08151	Indo-Oceanic	antisense_cyp138_475_from_start	2.83948403763307
SEA09020048	Euro-American	antisense_cyp138_475_from_start	2.37123052764611
SEA09167	Euro-American	antisense_cyp138_475_from_start	2.46193754051084
SEA11020038	Euro-American	antisense_cyp138_475_from_start	0
SEA11020057	Euro-American	antisense_cyp138_475_from_start	2.76643684427399
SEA11020068	Euro-American	antisense_cyp138_475_from_start	2.52601827749733
SEA11020092	Euro-American	antisense_cyp138_475_from_start	0.0622765614611447
SEA11278	Lineage 7	antisense_cyp138_475_from_start	2.8537464602995
SEA12126	Indo-Oceanic	antisense_cyp138_475_from_start	2.44069687594041
SEA12202	Indo-Oceanic	antisense_cyp138_475_from_start	2.45578932671198
SEA12334	Indo-Oceanic	antisense_cyp138_475_from_start	2.71432215427421
SEA13111	Indo-Oceanic	antisense_cyp138_475_from_start	2.8537464602995
SEA14117	East-Asian	antisense_cyp138_475_from_start	2.57116131485173
SEA14333	Indo-Oceanic	antisense_cyp138_475_from_start	2.56711734940836
SEA15228	Indo-Oceanic	antisense_cyp138_475_from_start	2.82984256506389
SEA15229	Indo-Oceanic	antisense_cyp138_475_from_start	2.85182860549911
SEA15230	Indo-Oceanic	antisense_cyp138_475_from_start	2.8537464602995
SEA17020023	Indo-Oceanic	antisense_cyp138_475_from_start	0
SEA17020024	Indo-Oceanic	antisense_cyp138_475_from_start	0
SEA17020028	East-Asian	antisense_cyp138_475_from_start	2.63533766280579
SEA17020030	Euro-American	antisense_cyp138_475_from_start	2.8537464602995
1-0006	East-Asian	sense_Rv0145_244_to_stop	2.8537464602995
1-0009	East-Asian	sense_Rv0145_244_to_stop	2.8537464602995
1-0013	East-Asian	sense_Rv0145_244_to_stop	2.8537464602995
1-0017	East-Asian	sense_Rv0145_244_to_stop	2.8537464602995
1-0021	East-African-Indian	sense_Rv0145_244_to_stop	2.8537464602995
1-0028	East-Asian	sense_Rv0145_244_to_stop	2.8537464602995
1-0030	Indo-Oceanic	sense_Rv0145_244_to_stop	2.8537464602995
1-0031	East-Asian	sense_Rv0145_244_to_stop	2.8537464602995
1-0036	Euro-American	sense_Rv0145_244_to_stop	2.74158291628959
1-0039	East-Asian	sense_Rv0145_244_to_stop	2.8537464602995
1-0044	Euro-American	sense_Rv0145_244_to_stop	0
1-0045	East-Asian	sense_Rv0145_244_to_stop	2.8537464602995
1-0047	East-African-Indian	sense_Rv0145_244_to_stop	2.71932562860928
1-0054	East-Asian	sense_Rv0145_244_to_stop	2.8537464602995
1-0056	East-Asian	sense_Rv0145_244_to_stop	2.8537464602995
1-0061	Indo-Oceanic	sense_Rv0145_244_to_stop	2.63841056681021
1-0064	East-Asian	sense_Rv0145_244_to_stop	2.8537464602995
1-0066	East-Asian	sense_Rv0145_244_to_stop	2.8537464602995
1-0069	East-Asian	sense_Rv0145_244_to_stop	2.61775174297919
1-0071	East-Asian	sense_Rv0145_244_to_stop	2.85159035113024
1-0084	East-Asian	sense_Rv0145_244_to_stop	2.8537464602995
1-0102	East-Asian	sense_Rv0145_244_to_stop	2.8537464602995
1-0107	East-African-Indian	sense_Rv0145_244_to_stop	2.8537464602995
1-0110	East-Asian	sense_Rv0145_244_to_stop	2.74908242773011
1-0112	East-Asian	sense_Rv0145_244_to_stop	2.8537464602995
1-0116	East-Asian	sense_Rv0145_244_to_stop	2.77434156341301
1-0123	East-Asian	sense_Rv0145_244_to_stop	2.8537464602995
1-0137	East-Asian	sense_Rv0145_244_to_stop	2.78990542265627
1-0149	East-Asian	sense_Rv0145_244_to_stop	2.8537464602995
1-0150	East-Asian	sense_Rv0145_244_to_stop	2.8537464602995
1-0153	East-Asian	sense_Rv0145_244_to_stop	2.8537464602995
1-0156	Euro-American	sense_Rv0145_244_to_stop	0
2-0013	East-Asian	sense_Rv0145_244_to_stop	2.53181573308916
2-0021	Euro-American	sense_Rv0145_244_to_stop	2.8537464602995
2-0022	Euro-American	sense_Rv0145_244_to_stop	2.8537464602995
2-0023	Euro-American	sense_Rv0145_244_to_stop	2.8537464602995
2-0028	Euro-American	sense_Rv0145_244_to_stop	2.76724588488704
2-0029	Euro-American	sense_Rv0145_244_to_stop	2.8537464602995
2-0034	East-Asian	sense_Rv0145_244_to_stop	2.8537464602995
2-0043-unknown	Euro-American	sense_Rv0145_244_to_stop	2.32537184301473
2-0046	Euro-American	sense_Rv0145_244_to_stop	2.8537464602995
2-0068	East-Asian	sense_Rv0145_244_to_stop	2.68779108682534
2-0111	Euro-American	sense_Rv0145_244_to_stop	2.8537464602995
3-0059	Euro-American	sense_Rv0145_244_to_stop	2.8537464602995
3-0090	Indo-Oceanic	sense_Rv0145_244_to_stop	0
3-0096	Indo-Oceanic	sense_Rv0145_244_to_stop	2.8537464602995
3-0124	Indo-Oceanic	sense_Rv0145_244_to_stop	2.8537464602995
4-0012	Euro-American	sense_Rv0145_244_to_stop	2.8537464602995
4-0062	East-Asian	sense_Rv0145_244_to_stop	2.8537464602995
4-0073	Euro-American	sense_Rv0145_244_to_stop	2.8537464602995
4-0077	East-Asian	sense_Rv0145_244_to_stop	2.8537464602995
4-0087	Euro-American	sense_Rv0145_244_to_stop	2.8537464602995
4-0096	East-Asian	sense_Rv0145_244_to_stop	2.8537464602995
N0054	East-African-Indian	sense_Rv0145_244_to_stop	2.8537464602995
N0091	M. africanum	sense_Rv0145_244_to_stop	2.8537464602995
N0153	Indo-Oceanic	sense_Rv0145_244_to_stop	2.8537464602995
N0157	Indo-Oceanic	sense_Rv0145_244_to_stop	0
[truncated: 53,877 more rows]
