# Supplementary material for: Drivers and sites of diversity in the DNA adenine methylomes of 93 Mycobacterium tuberculosis complex clinical isolates
Source: eLife. 2020 Oct 27;9:e58542. doi: 10.7554/eLife.58542 (PMC7591249; doi:10.7554/eLife.58542)
Supplement: Figure 4—source data 4. [file elife-58542-fig4-data4.csv]

sd	activity	RefLoci
0.321263323770453	E270A mutant	antisense_dnaA_520_to_stop
0.291393191622589	E270A mutant	sense_dnaA_517_to_stop
0.334577109794913	E270A mutant	antisense_recF_506_from_start
0.528375831792619	E270A mutant	sense_recF_509_from_start
0.31431947776283	E270A mutant	antisense_gyrB_67_from_start
0.263264527417377	E270A mutant	sense_gyrB_70_from_start
0.425804994589397	E270A mutant	antisense_gyrB_256_to_stop
0.256952743698163	E270A mutant	sense_gyrB_253_to_stop
0.302525449713719	E270A mutant	antisense_gyrA_613_from_start
0.354427860470332	E270A mutant	sense_gyrA_616_from_start
0.304548867467442	E270A mutant	antisense_Rv0007_119_from_start
0.347414879015148	E270A mutant	sense_Rv0007_122_from_start
0.310439833573487	E270A mutant	antisense_Rv0007_149_to_stop
0.351705994021319	E270A mutant	sense_Rv0007_146_to_stop
0.445421597265082	E270A mutant	sense_pstP_388_to_stop
0.573560940341691	E270A mutant	antisense_pstP_391_to_stop
0.28219024834723	E270A mutant	sense_Rv0021c_185_from_start
0.3092580079007	E270A mutant	antisense_Rv0021c_182_from_start
0.450708077353617	E270A mutant	antisense_Rv0023_217_to_stop
0.41632531047429	E270A mutant	sense_Rv0023_214_to_stop
0.428353475856202	E270A mutant	antisense_bioF2_625_from_start
0.36554972542047	E270A mutant	sense_bioF2_628_from_start
0.276340017027968	E270A mutant	antisense_fadD34_817_from_start
0.246604981884235	E270A mutant	sense_fadD34_820_from_start
0.370655956070537	E270A mutant	sense_mtc28_352_from_start
0.524066867495416	E270A mutant	antisense_mtc28_349_from_start
0.268666787116836	E270A mutant	antisense_leuS_595_to_stop
0.216418142700835	E270A mutant	sense_leuS_592_to_stop
0.38975599569588	E270A mutant	sense_Rv0042c_67_to_stop
0.309590072647014	E270A mutant	antisense_Rv0042c_70_to_stop
0.447764033495875	E270A mutant	sense_ino1_196_to_stop
0.401106865261393	E270A mutant	antisense_ino1_199_to_stop
0.410798895754938	E270A mutant	sense_ino1_367_to_stop
0.412241231124539	E270A mutant	antisense_ino1_370_to_stop
0.465149508891483	E270A mutant	sense_Rv0047c_7_from_start
0.449166541937372	E270A mutant	antisense_Rv0047c_4_from_start
0.417562370750376	E270A mutant	sense_Rv0048c_412_to_stop
0.440906614816798	E270A mutant	antisense_Rv0048c_415_to_stop
0.393781787957151	E270A mutant	81_down_of_Rv0052
0.352506225485366	E270A mutant	84_down_of_Rv0052
0.293382164489203	E270A mutant	antisense_dnaB_766_from_start
0.341241418875341	E270A mutant	sense_dnaB_769_from_start
0.289046266209262	E270A mutant	antisense_Rv0060_523_to_stop
0.239523784944941	E270A mutant	sense_Rv0060_520_to_stop
0.312721741521004	E270A mutant	antisense_Rv0060_469_to_stop
0.318703742262967	E270A mutant	sense_Rv0060_466_to_stop
0.336391564372952	E270A mutant	antisense_Rv0064_577_to_stop
0.264877084620583	E270A mutant	sense_Rv0064_574_to_stop
0.449374011853032	E270A mutant	sense_icd2_16_to_stop
0.419552525215598	E270A mutant	antisense_icd2_19_to_stop
0.398677087819776	E270A mutant	sense_icd2_556_to_stop
0.472823274918961	E270A mutant	antisense_icd2_559_to_stop
0.272682148884917	E270A mutant	antisense_Rv0068_421_to_stop
0.367065993397599	E270A mutant	sense_Rv0068_418_to_stop
0.268762317579773	E270A mutant	antisense_Rv0068_89_to_stop
0.24224939257645	E270A mutant	sense_Rv0068_86_to_stop
0.337445856270839	E270A mutant	sense_sdaA_417_to_stop
0.271924242557607	E270A mutant	antisense_sdaA_420_to_stop
0.267215375038689	E270A mutant	sense_Rv0093c_104_from_start
0.408831727677383	E270A mutant	antisense_Rv0093c_101_from_start
0.263945074894571	E270A mutant	antisense_PPE1_622_from_start
0.345000041431712	E270A mutant	sense_PPE1_625_from_start
0.26530089603602	E270A mutant	antisense_fadD10_757_from_start
0.325337241580765	E270A mutant	sense_fadD10_760_from_start
0.281723506887308	E270A mutant	antisense_fadD10_394_to_stop
0.362008394693467	E270A mutant	sense_fadD10_391_to_stop
0.348996626292835	E270A mutant	antisense_Rv0100_28_to_stop
0.358741369786489	E270A mutant	sense_Rv0100_25_to_stop
0.429848562407788	E270A mutant	antisense_nrp_178_from_start
0.321229276075358	E270A mutant	sense_nrp_181_from_start
0.293438608281389	E270A mutant	antisense_nrp_2823_from_start
0.295994980246823	E270A mutant	sense_nrp_2826_from_start
0.332879583483723	E270A mutant	antisense_nrp_1081_to_stop
0.382558800396125	E270A mutant	sense_nrp_1078_to_stop
0.313743219067627	E270A mutant	antisense_nrp_1012_to_stop
0.308699594901127	E270A mutant	sense_nrp_1009_to_stop
0.443829401620137	E270A mutant	7_up_of_Rv0102
0.34201621228421	E270A mutant	4_up_of_Rv0102
0.31162407248651	E270A mutant	antisense_Rv0102_398_from_start
0.347466456774123	E270A mutant	sense_Rv0102_401_from_start
0.453182960239967	E270A mutant	sense_ctpB_11_from_start
0.466068118439431	E270A mutant	antisense_ctpB_8_from_start
0.277842562944024	E270A mutant	antisense_Rv0106_289_from_start
0.2337417718686	E270A mutant	sense_Rv0106_292_from_start
0.340247221503163	E270A mutant	antisense_Rv0106_268_to_stop
0.38984924921028	E270A mutant	sense_Rv0106_265_to_stop
0.49950372081489	E270A mutant	697_up_of_ctpI
0.475464270257362	E270A mutant	700_up_of_ctpI
0.350937900548257	E270A mutant	484_down_of_Rv0108c
0.400754987008489	E270A mutant	481_down_of_Rv0108c
0.398746295015707	E270A mutant	sense_Rv0108c_88_to_stop
0.513680509841429	E270A mutant	antisense_Rv0108c_91_to_stop
0.336596799602318	E270A mutant	antisense_Rv0111_508_to_stop
0.39342359276547	E270A mutant	sense_Rv0111_505_to_stop
0.410280588352989	E270A mutant	antisense_hddA_298_from_start
0.35190349502218	E270A mutant	sense_hddA_301_from_start
0.439076997248363	E270A mutant	sense_ldtA_149_to_stop
0.293966252725562	E270A mutant	antisense_ldtA_152_to_stop
0.472111760459549	E270A mutant	antisense_oxyS_16_from_start
0.430258728982855	E270A mutant	sense_oxyS_19_from_start
0.291419037900504	E270A mutant	sense_oxcA_145_to_stop
0.256274157593248	E270A mutant	antisense_oxcA_148_to_stop
0.271925849090665	E270A mutant	antisense_fadD7_760_to_stop
0.279389048471254	E270A mutant	sense_fadD7_757_to_stop
0.355962027599155	E270A mutant	sense_fusA2_754_from_start
0.282287245468314	E270A mutant	antisense_fusA2_751_from_start
0.420828922123301	E270A mutant	8_up_of_fusA2
0.447877359364045	E270A mutant	11_up_of_fusA2
0.389741709294324	E270A mutant	antisense_PE_PGRS2_251_from_start
0.462891477589859	E270A mutant	sense_PE_PGRS2_254_from_start
0.36789669884669	E270A mutant	antisense_ephF_216_from_start
0.328591998089842	E270A mutant	sense_ephF_219_from_start
0.429269118064695	E270A mutant	antisense_cyp138_400_to_stop
0.355836824345453	E270A mutant	sense_cyp138_397_to_stop
0.345199203306862	E270A mutant	sense_msrA_65_to_stop
0.389971454746545	E270A mutant	antisense_msrA_68_to_stop
0.456030009466566	E270A mutant	antisense_Rv0139_403_to_stop
0.335865652208632	E270A mutant	sense_Rv0139_400_to_stop
0.4450178436467	E270A mutant	sense_Rv0141c_117_from_start
0.531178702676702	E270A mutant	antisense_Rv0141c_114_from_start
0.346695754686236	E270A mutant	antisense_Rv0142_322_to_stop
0.364198243302235	E270A mutant	sense_Rv0142_319_to_stop
0.359709386640604	E270A mutant	antisense_Rv0142_264_to_stop
0.32860768321409	E270A mutant	sense_Rv0142_261_to_stop
0.244426601731152	E270A mutant	antisense_Rv0142_115_to_stop
0.39835704433947	E270A mutant	sense_Rv0142_112_to_stop
0.280030711280363	E270A mutant	sense_Rv0143c_132_to_stop
0.273518208640791	E270A mutant	antisense_Rv0143c_135_to_stop
0.39888416693521	E270A mutant	antisense_Rv0148_35_from_start
0.421574075851281	E270A mutant	sense_Rv0148_38_from_start
0.256294073050557	E270A mutant	antisense_Rv0148_322_to_stop
0.384394089286209	E270A mutant	sense_Rv0148_319_to_stop
0.293381901114898	E270A mutant	sense_PE2_514_from_start
0.325283999973256	E270A mutant	antisense_PE2_511_from_start
0.406405613235528	E270A mutant	sense_fadE2_214_from_start
0.441525312172147	E270A mutant	antisense_fadE2_211_from_start
0.588291349918531	E270A mutant	antisense_pntB_400_to_stop
0.446181581293796	E270A mutant	sense_pntB_397_to_stop
0.328870009093135	E270A mutant	sense_PE4_400_to_stop
0.40631127400848	E270A mutant	antisense_PE4_403_to_stop
0.337109898764003	E270A mutant	antisense_Rv0161_173_from_start
0.332980028364019	E270A mutant	sense_Rv0161_176_from_start
0.420007836826602	E270A mutant	antisense_TB18.5_55_to_stop
0.397677630844095	E270A mutant	sense_TB18.5_52_to_stop
0.383687456894062	E270A mutant	sense_mce1R_223_from_start
0.359713121278776	E270A mutant	antisense_mce1R_220_from_start
0.463432450664639	E270A mutant	antisense_fadD5_808_from_start
0.339222665081736	E270A mutant	sense_fadD5_811_from_start
0.279422408313648	E270A mutant	antisense_mce1B_91_to_stop
0.378390121931748	E270A mutant	sense_mce1B_88_to_stop
0.42535209899554	E270A mutant	antisense_mce1F_327_to_stop
0.452890746576512	E270A mutant	sense_mce1F_324_to_stop
0.255591365702552	E270A mutant	sense_lprO_335_from_start
0.321210047651957	E270A mutant	antisense_lprO_332_from_start
0.341416010303976	E270A mutant	sense_sigG_352_from_start
0.235961327980892	E270A mutant	antisense_sigG_349_from_start
0.376438211195072	E270A mutant	sense_ilvD_85_from_start
0.424093964590343	E270A mutant	antisense_ilvD_82_from_start
0.201797304511174	E270A mutant	16_up_of_Rv0190
0.214519669523682	E270A mutant	13_up_of_Rv0190
0.429306768686198	E270A mutant	7_down_of_Rv0193c
0.481177829086535	E270A mutant	4_down_of_Rv0193c
0.389984904097968	E270A mutant	antisense_Rv0194_1000_from_start
0.334494834491847	E270A mutant	sense_Rv0194_1003_from_start
0.323937836239933	E270A mutant	antisense_Rv0196_220_from_start
0.454072976750289	E270A mutant	sense_Rv0196_223_from_start
0.34665280308956	E270A mutant	antisense_Rv0197_475_to_stop
0.288618221800599	E270A mutant	sense_Rv0197_472_to_stop
0.332740404115637	E270A mutant	sense_zmp1_616_from_start
0.227659982251839	E270A mutant	antisense_zmp1_613_from_start
0.529121162129427	E270A mutant	99_up_of_mmpL11
0.438251782381234	E270A mutant	102_up_of_mmpL11
0.575835967469639	E270A mutant	sense_mmpL3_1192_to_stop
0.371524198638922	E270A mutant	antisense_mmpL3_1195_to_stop
0.562488930116289	E270A mutant	sense_Rv0207c_121_to_stop
0.410528171851336	E270A mutant	antisense_Rv0207c_124_to_stop
0.503180091012651	E270A mutant	antisense_Rv0209_301_to_stop
0.395682928456189	E270A mutant	sense_Rv0209_298_to_stop
0.319503807128848	E270A mutant	antisense_pckA_499_from_start
0.300781974597544	E270A mutant	sense_pckA_502_from_start
0.357438442797712	E270A mutant	antisense_pckA_639_from_start
0.393833967472033	E270A mutant	sense_pckA_642_from_start
0.278698207627624	E270A mutant	sense_nadR_373_to_stop
0.357449822847143	E270A mutant	antisense_nadR_376_to_stop
0.505631134127682	E270A mutant	20_up_of_fadD4
0.470361460277963	E270A mutant	17_up_of_fadD4
0.40955978794422	E270A mutant	antisense_Rv0218_272_to_stop
0.466728706886594	E270A mutant	sense_Rv0218_269_to_stop
0.234685443555973	E270A mutant	antisense_lipC_331_to_stop
0.246839884280748	E270A mutant	sense_lipC_328_to_stop
0.28383364587107	E270A mutant	antisense_lipC_133_to_stop
0.440405870614317	E270A mutant	sense_lipC_130_to_stop
0.366399097029895	E270A mutant	sense_Rv0227c_150_to_stop
0.286308662161646	E270A mutant	antisense_Rv0227c_153_to_stop
0.532365877243896	E270A mutant	antisense_Rv0232_337_to_stop
0.27606398484959	E270A mutant	sense_Rv0232_334_to_stop
0.299714019932532	E270A mutant	sense_Rv0235c_391_from_start
0.41912661717796	E270A mutant	antisense_Rv0235c_388_from_start
0.247859337604893	E270A mutant	sense_Rv0235c_49_from_start
0.3965327119313	E270A mutant	antisense_Rv0235c_46_from_start
0.308795827101742	E270A mutant	sense_aftD_326_to_stop
0.470688692233855	E270A mutant	antisense_aftD_329_to_stop
0.509705425287082	E270A mutant	antisense_vapB24_103_from_start
0.346583214814956	E270A mutant	sense_vapB24_106_from_start
0.413053354627889	E270A mutant	sense_fabG4_424_from_start
0.36150098674092	E270A mutant	antisense_fabG4_421_from_start
0.315616997143194	E270A mutant	antisense_fadA2_602_to_stop
0.376498685312386	E270A mutant	sense_fadA2_599_to_stop
0.191818808241973	E270A mutant	antisense_Rv0246_72_to_stop
0.25442338363755	E270A mutant	sense_Rv0246_69_to_stop
0.3305436426059	E270A mutant	sense_Rv0248c_76_to_stop
0.308512428616003	E270A mutant	antisense_Rv0248c_79_to_stop
0.300177381862991	E270A mutant	sense_Rv0248c_415_from_start
0.321932875641212	E270A mutant	antisense_Rv0248c_412_from_start
0.326048752988899	E270A mutant	antisense_nirB_136_to_stop
0.412170137409959	E270A mutant	sense_nirB_133_to_stop
0.398540915088268	E270A mutant	sense_PPE2_507_to_stop
0.321043058624694	E270A mutant	antisense_PPE2_510_to_stop
0.538215798503868	E270A mutant	6_down_of_Rv0264c
0.474298761906062	E270A mutant	3_down_of_Rv0264c
0.381484599652585	E270A mutant	sense_oplA_340_to_stop
0.247507822025035	E270A mutant	antisense_oplA_343_to_stop
0.416008507243067	E270A mutant	sense_oplA_421_from_start
0.409158969132655	E270A mutant	antisense_oplA_418_from_start
0.543647141145954	E270A mutant	sense_Rv0269c_496_from_start
0.438312646053065	E270A mutant	antisense_Rv0269c_493_from_start
0.470203377464633	E270A mutant	antisense_fadD2_43_from_start
0.42554423641123	E270A mutant	sense_fadD2_46_from_start
0.339184712278189	E270A mutant	antisense_fadD2_130_from_start
0.436579163165555	E270A mutant	sense_fadD2_133_from_start
0.393148057354848	E270A mutant	antisense_fadD2_709_to_stop
0.401733567512907	E270A mutant	sense_fadD2_706_to_stop
0.344390360319028	E270A mutant	antisense_Rv0276_70_from_start
0.384562484004213	E270A mutant	sense_Rv0276_73_from_start
0.282508887842337	E270A mutant	sense_Rv0278c_1017_to_stop
0.330502006586364	E270A mutant	antisense_Rv0278c_1020_to_stop
0.322721247582885	E270A mutant	sense_Rv0278c_1302_to_stop
0.425123911217635	E270A mutant	antisense_Rv0278c_1305_to_stop
0.330294345489657	E270A mutant	antisense_PPE3_15_to_stop
0.285740787090464	E270A mutant	sense_PPE3_12_to_stop
0.277240867342037	E270A mutant	antisense_eccA3_673_from_start
0.389700857962535	E270A mutant	sense_eccA3_676_from_start
0.471439413155095	E270A mutant	antisense_eccB3_610_from_start
0.467665714213949	E270A mutant	sense_eccB3_613_from_start
0.415607674847826	E270A mutant	antisense_eccB3_449_to_stop
0.477345463406632	E270A mutant	sense_eccB3_446_to_stop
0.360129708315464	E270A mutant	antisense_eccB3_186_to_stop
0.291703953567346	E270A mutant	sense_eccB3_183_to_stop
0.240999206816181	E270A mutant	antisense_eccC3_757_from_start
0.51274506870346	E270A mutant	sense_eccC3_760_from_start
0.443107638416406	E270A mutant	antisense_eccC3_891_to_stop
0.276340121643725	E270A mutant	sense_eccC3_888_to_stop
0.278583888273473	E270A mutant	antisense_PPE4_99_from_start
0.442761007508481	E270A mutant	sense_PPE4_102_from_start
0.473011589730085	E270A mutant	antisense_eccD3_481_to_stop
0.540680362948726	E270A mutant	sense_eccD3_478_to_stop
0.286330814996527	E270A mutant	antisense_eccE3_280_to_stop
0.236345792318446	E270A mutant	sense_eccE3_277_to_stop
0.249743601593126	E270A mutant	12_up_of_Rv0296c
0.254911614786476	E270A mutant	15_up_of_Rv0296c
0.431055878597042	E270A mutant	antisense_Rv0302_13_to_stop
0.457863662519446	E270A mutant	sense_Rv0302_10_to_stop
0.407883806217724	E270A mutant	sense_PPE5_2434_from_start
0.412988046977264	E270A mutant	antisense_PPE5_2431_from_start
0.457210371501027	E270A mutant	sense_PPE6_2843_from_start
0.384539831769536	E270A mutant	antisense_PPE6_2840_from_start
0.264773384870484	E270A mutant	sense_PPE6_1148_from_start
0.35703086943008	E270A mutant	antisense_PPE6_1145_from_start
0.515501840564896	E270A mutant	sense_PPE6_470_from_start
0.407668927202328	E270A mutant	antisense_PPE6_467_from_start
0.34421441859228	E270A mutant	antisense_Rv0311_331_to_stop
0.366048095707126	E270A mutant	sense_Rv0311_328_to_stop
0.485272570100309	E270A mutant	sense_Rv0314c_43_from_start
0.346542943004356	E270A mutant	antisense_Rv0314c_40_from_start
0.461633739953192	E270A mutant	antisense_Rv0316_199_from_start
0.457629909351003	E270A mutant	sense_Rv0316_202_from_start
0.466021713702692	E270A mutant	antisense_dcd_253_from_start
0.418412414660332	E270A mutant	sense_dcd_256_from_start
0.470033310020108	E270A mutant	antisense_dcd_190_to_stop
0.415087220842051	E270A mutant	sense_dcd_187_to_stop
0.359236383889989	E270A mutant	sense_Rv0330c_350_from_start
0.255124296618777	E270A mutant	antisense_Rv0330c_347_from_start
0.336775380507388	E270A mutant	antisense_Rv0332_52_from_start
0.535913030256204	E270A mutant	sense_Rv0332_55_from_start
0.486485536805464	E270A mutant	antisense_Rv0332_126_from_start
0.496212669200059	E270A mutant	sense_Rv0332_129_from_start
0.378033627300028	E270A mutant	antisense_Rv0332_301_to_stop
0.267076689395808	E270A mutant	sense_Rv0332_298_to_stop
0.237965628503453	E270A mutant	antisense_rmlA_400_to_stop
0.34331208576471	E270A mutant	sense_rmlA_397_to_stop
0.319751153130098	E270A mutant	antisense_rmlA_151_to_stop
0.264862108614092	E270A mutant	sense_rmlA_148_to_stop
0.272412760702237	E270A mutant	antisense_rmlA_22_to_stop
0.250959655267611	E270A mutant	sense_rmlA_19_to_stop
0.357803419602873	E270A mutant	sense_Rv0338c_1312_from_start
0.367077881336233	E270A mutant	antisense_Rv0338c_1309_from_start
0.260085324924336	E270A mutant	sense_Rv0339c_603_to_stop
0.523809561030816	E270A mutant	antisense_Rv0339c_606_to_stop
0.380933582507233	E270A mutant	antisense_iniB_435_to_stop
0.189960454130323	E270A mutant	sense_iniB_432_to_stop
0.330985864266612	E270A mutant	antisense_iniC_472_to_stop
0.434000542241846	E270A mutant	sense_iniC_469_to_stop
0.458390488313265	E270A mutant	sense_ansP2_484_from_start
0.496698880277781	E270A mutant	antisense_ansP2_481_from_start
0.297624700680838	E270A mutant	antisense_Rv0347_214_to_stop
0.263193218278552	E270A mutant	sense_Rv0347_211_to_stop
0.405611578884522	E270A mutant	antisense_Rv0348_193_from_start
0.29303117813765	E270A mutant	sense_Rv0348_196_from_start
0.298976442289332	E270A mutant	antisense_Rv0348_318_to_stop
0.301152035823481	E270A mutant	sense_Rv0348_315_to_stop
0.48830702566054	E270A mutant	antisense_Rv0348_175_to_stop
0.457767024705151	E270A mutant	sense_Rv0348_172_to_stop
0.344301612559655	E270A mutant	antisense_Rv0349_10_from_start
0.344101835428226	E270A mutant	sense_Rv0349_13_from_start
0.383181453006914	E270A mutant	antisense_Rv0349_130_from_start
0.315022785161809	E270A mutant	sense_Rv0349_133_from_start
0.470838847410365	E270A mutant	antisense_dnaK_96_from_start
0.449937017859775	E270A mutant	sense_dnaK_99_from_start
0.325647679751003	E270A mutant	antisense_dnaK_541_from_start
0.325046259074879	E270A mutant	sense_dnaK_544_from_start
0.523158557285655	E270A mutant	antisense_grpE_118_to_stop
0.452028676262612	E270A mutant	sense_grpE_115_to_stop
0.420879285043139	E270A mutant	antisense_dnaJ1_448_from_start
0.394228851680038	E270A mutant	sense_dnaJ1_451_from_start
0.421229207139334	E270A mutant	sense_PPE8_2710_from_start
0.404950818190479	E270A mutant	antisense_PPE8_2707_from_start
0.413151892500943	E270A mutant	sense_purA_637_from_start
0.389173931532689	E270A mutant	antisense_purA_634_from_start
0.501697298414327	E270A mutant	sense_purA_574_from_start
0.378031960827114	E270A mutant	antisense_purA_571_from_start
0.397340726514574	E270A mutant	antisense_Rv0359_208_to_stop
0.366506233310168	E270A mutant	sense_Rv0359_205_to_stop
0.387233142003551	E270A mutant	antisense_Rv0359_17_to_stop
0.39852382210951	E270A mutant	sense_Rv0359_14_to_stop
0.42143613560781	E270A mutant	antisense_Rv0361_11_to_stop
0.446806936966201	E270A mutant	sense_Rv0361_8_to_stop
0.358068313806924	E270A mutant	antisense_mgtE_355_from_start
0.277312658389362	E270A mutant	sense_mgtE_358_from_start
0.421468169251964	E270A mutant	sense_Rv0366c_23_to_stop
0.359022209496769	E270A mutant	antisense_Rv0366c_26_to_stop
0.465138041520729	E270A mutant	sense_Rv0367c_178_to_stop
0.461885624723518	E270A mutant	antisense_Rv0367c_181_to_stop
0.290064641126864	E270A mutant	sense_Rv0368c_526_from_start
0.409639609089372	E270A mutant	antisense_Rv0368c_523_from_start
0.449314213337536	E270A mutant	sense_Rv0369c_8_from_start
0.253086897565078	E270A mutant	antisense_Rv0369c_5_from_start
0.415491878013026	E270A mutant	16_up_of_Rv0369c
0.253029265527508	E270A mutant	19_up_of_Rv0369c
0.378765336311304	E270A mutant	35_up_of_Rv0369c
0.345889922032944	E270A mutant	38_up_of_Rv0369c
0.277149864678519	E270A mutant	sense_Rv0370c_445_to_stop
0.237652745916329	E270A mutant	antisense_Rv0370c_448_from_start
0.25905119995876	E270A mutant	sense_Rv0370c_392_from_start
0.274498847690383	E270A mutant	antisense_Rv0370c_389_from_start
0.246010050777078	E270A mutant	sense_Rv0372c_310_from_start
0.349670799778819	E270A mutant	antisense_Rv0372c_307_from_start
0.2584923043451	E270A mutant	sense_Rv0373c_499_from_start
0.219796504870713	E270A mutant	antisense_Rv0373c_496_from_start
0.251764040920264	E270A mutant	sense_Rv0375c_347_to_stop
0.231025426622004	E270A mutant	antisense_Rv0375c_350_to_stop
0.261754168241196	E270A mutant	antisense_Rv0377_288_from_start
0.289470793995976	E270A mutant	sense_Rv0377_291_from_start
0.323694423880519	E270A mutant	antisense_Rv0377_277_to_stop
0.443636151498678	E270A mutant	sense_Rv0377_274_to_stop
0.307684988370533	E270A mutant	60_up_of_Rv0378
0.529074365234502	E270A mutant	57_up_of_Rv0378
0.325731623316287	E270A mutant	antisense_Rv0378_90_to_stop
0.321003986520912	E270A mutant	sense_Rv0378_87_to_stop
0.516463945214363	E270A mutant	sense_Rv0380c_202_to_stop
0.434160578195867	E270A mutant	antisense_Rv0380c_205_to_stop
0.345980695139861	E270A mutant	sense_Rv0380c_268_to_stop
0.566654306605245	E270A mutant	antisense_Rv0380c_271_to_stop
0.356435378905848	E270A mutant	sense_Rv0381c_268_to_stop
0.380402591263488	E270A mutant	antisense_Rv0381c_271_to_stop
0.246068230304913	E270A mutant	sense_PPE9_63_from_start
0.363431182312071	E270A mutant	antisense_PPE9_60_from_start
0.469481155281116	E270A mutant	sense_ndhA_250_to_stop
0.482777541163341	E270A mutant	antisense_ndhA_253_to_stop
0.505513755071897	E270A mutant	sense_ndhA_436_from_start
0.403436929105495	E270A mutant	antisense_ndhA_433_from_start
0.356077338216365	E270A mutant	sense_Rv0394c_54_to_stop
0.276506887812192	E270A mutant	antisense_Rv0394c_57_to_stop
0.315212244062205	E270A mutant	sense_fadE7_85_to_stop
0.384123570028413	E270A mutant	antisense_fadE7_88_to_stop
0.268681746877706	E270A mutant	sense_fadE7_118_to_stop
0.28468723462279	E270A mutant	antisense_fadE7_121_to_stop
0.352813480017065	E270A mutant	sense_fadE7_280_from_start
0.433147066324515	E270A mutant	antisense_fadE7_277_from_start
0.34048833971218	E270A mutant	sense_mmpL1_253_from_start
0.318485388565366	E270A mutant	antisense_mmpL1_250_from_start
0.250964805954577	E270A mutant	antisense_fadD30_489_from_start
0.25351041454341	E270A mutant	sense_fadD30_492_from_start
0.347938001907122	E270A mutant	antisense_fgd1_49_to_stop
0.374976703915183	E270A mutant	sense_fgd1_46_to_stop
0.182617141785495	E270A mutant	antisense_pta_574_to_stop
0.224918632852498	E270A mutant	sense_pta_571_to_stop
0.295046383394685	E270A mutant	sense_pknG_775_from_start
0.455550154952989	E270A mutant	antisense_pknG_772_from_start
0.254628512620432	E270A mutant	antisense_thiO_507_from_start
0.341420028249416	E270A mutant	sense_thiO_510_from_start
0.331223887581505	E270A mutant	sense_thiC_622_from_start
0.304789948792696	E270A mutant	antisense_thiC_619_from_start
0.412457244222529	E270A mutant	sense_ctpH_87_to_stop
0.483788777972744	E270A mutant	antisense_ctpH_90_to_stop
0.334852722067088	E270A mutant	sense_ctpH_1659_from_start
0.442844659074658	E270A mutant	antisense_ctpH_1656_from_start
0.415268843266598	E270A mutant	sense_ctpH_1601_from_start
0.268954697733104	E270A mutant	antisense_ctpH_1598_from_start
0.399503573343723	E270A mutant	sense_xthA_302_to_stop
0.253511635781352	E270A mutant	antisense_xthA_305_to_stop
0.453837438562186	E270A mutant	sense_xthA_327_from_start
0.375291289435425	E270A mutant	antisense_xthA_324_from_start
0.420063453240702	E270A mutant	antisense_Rv0433_415_to_stop
0.26137834964036	E270A mutant	sense_Rv0433_412_to_stop
0.389973037381491	E270A mutant	antisense_Rv0433_163_to_stop
0.386873510952055	E270A mutant	sense_Rv0433_160_to_stop
0.364929445861509	E270A mutant	sense_Rv0435c_1045_to_stop
0.403961391194357	E270A mutant	antisense_Rv0435c_1048_to_stop
0.498120970411157	E270A mutant	antisense_groEL2_181_from_start
0.584415885928096	E270A mutant	sense_groEL2_184_from_start
0.483051441501595	E270A mutant	antisense_groEL2_637_from_start
0.498730472343615	E270A mutant	sense_groEL2_640_from_start
0.299932669785594	E270A mutant	antisense_groEL2_703_to_stop
0.310634006160895	E270A mutant	sense_groEL2_700_to_stop
0.344394255670856	E270A mutant	antisense_groEL2_292_to_stop
0.256827656652532	E270A mutant	sense_groEL2_289_to_stop
0.415826729120291	E270A mutant	antisense_groEL2_253_to_stop
0.451583255752436	E270A mutant	sense_groEL2_250_to_stop
0.285004571556137	E270A mutant	sense_mmpL4_1184_to_stop
0.198054820175589	E270A mutant	antisense_mmpL4_1187_to_stop
0.214765025197775	E270A mutant	71_up_of_Rv0452
0.394484401546018	E270A mutant	68_up_of_Rv0452
0.312118223304475	E270A mutant	antisense_Rv0452_109_from_start
0.28745371367675	E270A mutant	sense_Rv0452_112_from_start
0.408517668548555	E270A mutant	antisense_PPE11_280_from_start
0.28005075510707	E270A mutant	sense_PPE11_283_from_start
0.317425694311844	E270A mutant	antisense_Rv0454_116_to_stop
0.347609010326645	E270A mutant	sense_Rv0454_113_to_stop
0.290659380963561	E270A mutant	sense_Rv0457c_875_to_stop
0.301455545769412	E270A mutant	antisense_Rv0457c_878_to_stop
0.337412506379232	E270A mutant	antisense_Rv0458_687_from_start
0.33991611218532	E270A mutant	sense_Rv0458_690_from_start
0.394347775301911	E270A mutant	antisense_Rv0458_568_to_stop
0.293101087425478	E270A mutant	sense_Rv0458_565_to_stop
0.349224456385648	E270A mutant	sense_Rv0465c_386_to_stop
0.366890088234451	E270A mutant	antisense_Rv0465c_389_to_stop
0.281974815201904	E270A mutant	sense_Rv0465c_646_from_start
0.401599986309135	E270A mutant	antisense_Rv0465c_643_from_start
0.249632754095495	E270A mutant	sense_Rv0465c_85_from_start
0.366445224304107	E270A mutant	antisense_Rv0465c_82_from_start
0.491651485604094	E270A mutant	antisense_Rv0466_136_to_stop
0.338632961778713	E270A mutant	sense_Rv0466_133_to_stop
0.401302401903111	E270A mutant	antisense_icl1_112_from_start
0.515667915223188	E270A mutant	sense_icl1_115_from_start
0.290664748967117	E270A mutant	antisense_fadB2_154_from_start
0.332949710552973	E270A mutant	sense_fadB2_157_from_start
0.485425936295305	E270A mutant	antisense_fadB2_363_from_start
0.481654726833203	E270A mutant	sense_fadB2_366_from_start
0.274058179607765	E270A mutant	antisense_umaA_136_to_stop
0.297532657866049	E270A mutant	sense_umaA_133_to_stop
0.326265315987621	E270A mutant	sense_pcaA_361_from_start
0.293070728757456	E270A mutant	antisense_pcaA_358_from_start
0.379280356152555	E270A mutant	sense_pcaA_345_from_start
0.32560520203088	E270A mutant	antisense_pcaA_342_from_start
0.49074604607046	E270A mutant	sense_Rv0472c_98_to_stop
0.512306153983726	E270A mutant	antisense_Rv0472c_101_to_stop
0.43660799078925	E270A mutant	84_up_of_hbhA
0.523524138639761	E270A mutant	81_up_of_hbhA
0.578013667650192	E270A mutant	sense_Rv0479c_137_to_stop
0.373076590348283	E270A mutant	antisense_Rv0479c_140_to_stop
0.461668072040339	E270A mutant	antisense_murB_353_to_stop
0.611523873141371	E270A mutant	sense_murB_350_to_stop
0.41320300019517	E270A mutant	sense_Rv0484c_219_to_stop
0.343103563072931	E270A mutant	antisense_Rv0484c_222_to_stop
0.39998805559905	E270A mutant	antisense_Rv0485_475_to_stop
0.353093997138809	E270A mutant	sense_Rv0485_472_to_stop
0.368120997042679	E270A mutant	antisense_Rv0488_117_to_stop
0.50823920743764	E270A mutant	sense_Rv0488_114_to_stop
0.373618187066519	E270A mutant	antisense_regX3_271_from_start
0.475933298613793	E270A mutant	sense_regX3_274_from_start
0.308784836789382	E270A mutant	antisense_regX3_292_to_stop
0.374765267649709	E270A mutant	sense_regX3_289_to_stop
0.357580039736169	E270A mutant	sense_Rv0492c_381_to_stop
0.451291557390291	E270A mutant	antisense_Rv0492c_384_to_stop
0.284774676220034	E270A mutant	sense_Rv0492c_826_from_start
0.286474983874488	E270A mutant	antisense_Rv0492c_823_from_start
0.29255421478974	E270A mutant	antisense_Rv0494_328_from_start
0.39434189011753	E270A mutant	sense_Rv0494_331_from_start
0.30360001101278	E270A mutant	antisense_proC_220_to_stop
0.246049017202891	E270A mutant	sense_proC_217_to_stop
0.379509951541891	E270A mutant	sense_Rv0504c_217_from_start
0.509748374648663	E270A mutant	antisense_Rv0504c_214_from_start
0.373524045273585	E270A mutant	antisense_mmpL2_775_to_stop
0.321314094062924	E270A mutant	sense_mmpL2_772_to_stop
0.435621558349904	E270A mutant	antisense_hemC_241_to_stop
0.476152184656598	E270A mutant	sense_hemC_238_to_stop
0.417537702853156	E270A mutant	antisense_hemD_236_to_stop
0.51573400814188	E270A mutant	sense_hemD_233_to_stop
0.516479412856185	E270A mutant	antisense_Rv0528_183_from_start
0.51909553208619	E270A mutant	sense_Rv0528_186_from_start
0.380788529395986	E270A mutant	antisense_Rv0530_436_to_stop
0.374582067004341	E270A mutant	sense_Rv0530_433_to_stop
0.373174913780763	E270A mutant	antisense_Rv0530_176_to_stop
0.49800307451711	E270A mutant	sense_Rv0530_173_to_stop
0.256760310461572	E270A mutant	antisense_Rv0538_183_to_stop
0.311423117065919	E270A mutant	sense_Rv0538_180_to_stop
0.315568080316334	E270A mutant	antisense_Rv0539_151_to_stop
0.371763103100652	E270A mutant	sense_Rv0539_148_to_stop
0.466765818437001	E270A mutant	sense_pitA_384_from_start
0.350734727181512	E270A mutant	antisense_pitA_381_from_start
0.417261416654995	E270A mutant	sense_pitA_238_from_start
0.55484431395121	E270A mutant	antisense_pitA_235_from_start
0.480026358409312	E270A mutant	sense_menB_23_to_stop
0.312297311461559	E270A mutant	antisense_menB_26_to_stop
0.297023295077521	E270A mutant	sense_menB_226_to_stop
0.285774378066022	E270A mutant	antisense_menB_229_to_stop
0.38351596449673	E270A mutant	sense_menB_412_from_start
0.497782958666668	E270A mutant	antisense_menB_409_from_start
0.306544578893708	E270A mutant	sense_menB_11_from_start
0.203237586879223	E270A mutant	antisense_menB_8_from_start
0.435893482806471	E270A mutant	sense_vapC3_135_to_stop
0.311480988086035	E270A mutant	antisense_vapC3_138_to_stop
0.453231896006379	E270A mutant	sense_vapC3_190_to_stop
0.370013510746087	E270A mutant	antisense_vapC3_193_to_stop
0.293603286213312	E270A mutant	sense_fadD8_496_from_start
0.395781922613912	E270A mutant	antisense_fadD8_493_from_start
0.338080873722677	E270A mutant	antisense_Rv0552_214_from_start
0.369268650883403	E270A mutant	sense_Rv0552_217_from_start
0.267710030177002	E270A mutant	antisense_menC_275_to_stop
0.296607615238343	E270A mutant	sense_menC_272_to_stop
0.277928682810256	E270A mutant	antisense_bpoC_346_to_stop
0.390349843809832	E270A mutant	sense_bpoC_343_to_stop
0.264898053182247	E270A mutant	sense_Rv0561c_390_to_stop
0.269076141433626	E270A mutant	antisense_Rv0561c_393_to_stop
0.404306290188432	E270A mutant	antisense_htpX_22_to_stop
0.3545220286372	E270A mutant	sense_htpX_19_to_stop
0.377537094672581	E270A mutant	15_down_of_Rv0566c
0.414517179247896	E270A mutant	12_down_of_Rv0566c
0.32953024852747	E270A mutant	antisense_Rv0567_26_to_stop
0.385770078436549	E270A mutant	sense_Rv0567_23_to_stop
0.311272544925222	E270A mutant	antisense_cyp135B1_591_from_start
0.371147347954448	E270A mutant	sense_cyp135B1_594_from_start
0.259236061606749	E270A mutant	antisense_cyp135B1_598_to_stop
0.312004673767647	E270A mutant	sense_cyp135B1_595_to_stop
0.374455213686124	E270A mutant	antisense_nrdZ_653_from_start
0.211935608909467	E270A mutant	sense_nrdZ_656_from_start
0.376906834494709	E270A mutant	antisense_nrdZ_424_to_stop
0.370817723520781	E270A mutant	sense_nrdZ_421_to_stop
0.315211193777939	E270A mutant	sense_pncB2_365_to_stop
0.273184925541196	E270A mutant	antisense_pncB2_368_to_stop
0.300011424673879	E270A mutant	sense_Rv0574c_37_to_stop
0.453476690555423	E270A mutant	antisense_Rv0574c_40_to_stop
0.318328018021124	E270A mutant	sense_Rv0574c_256_from_start
0.226388663205112	E270A mutant	antisense_Rv0574c_253_from_start
0.285015668208278	E270A mutant	antisense_Rv0576_237_from_start
0.361145928098748	E270A mutant	sense_Rv0576_240_from_start
0.556280546174381	E270A mutant	antisense_Rv0579_118_from_start
0.399019573102618	E270A mutant	sense_Rv0579_121_from_start
0.443952908391715	E270A mutant	antisense_Rv0579_139_to_stop
0.370400773599846	E270A mutant	sense_Rv0579_136_to_stop
0.29654719706985	E270A mutant	antisense_Rv0584_1255_to_stop
0.208989665146289	E270A mutant	sense_Rv0584_1252_to_stop
0.344037820689677	E270A mutant	antisense_Rv0584_1156_to_stop
0.263301317934916	E270A mutant	sense_Rv0584_1153_to_stop
0.307716773000614	E270A mutant	sense_Rv0585c_157_from_start
0.288882154152472	E270A mutant	antisense_Rv0585c_154_from_start
0.2975648384493	E270A mutant	antisense_yrbE2A_338_from_start
0.332365524705932	E270A mutant	sense_yrbE2A_341_from_start
0.23932563993613	E270A mutant	antisense_mce2C_322_from_start
0.253263077117251	E270A mutant	sense_mce2C_325_from_start
0.208831773340505	E270A mutant	antisense_mce2C_40_to_stop
0.375432059301989	E270A mutant	sense_mce2C_37_to_stop
0.364518370952039	E270A mutant	antisense_lprL_325_from_start
0.444697894058553	E270A mutant	sense_lprL_328_from_start
0.320522469456274	E270A mutant	sense_Rv0597c_310_to_stop
0.438277302999439	E270A mutant	antisense_Rv0597c_313_to_stop
0.262961551822696	E270A mutant	41_down_of_vapC27
0.250456935395964	E270A mutant	38_down_of_vapC27
0.274269671424598	E270A mutant	sense_Rv0600c_53_from_start
0.454178132612592	E270A mutant	antisense_Rv0600c_50_from_start
0.337974014633784	E270A mutant	sense_tcrA_313_to_stop
0.352308343549674	E270A mutant	antisense_tcrA_316_to_stop
0.340754381401159	E270A mutant	sense_Rv0610c_64_to_stop
0.215589062283561	E270A mutant	antisense_Rv0610c_67_to_stop
0.457818902631328	E270A mutant	sense_Rv0610c_139_to_stop
0.370374294690006	E270A mutant	antisense_Rv0610c_142_to_stop
0.250811426712261	E270A mutant	antisense_Rv0612_163_to_stop
0.456343040408558	E270A mutant	sense_Rv0612_160_to_stop
0.528741810169033	E270A mutant	sense_Rv0613c_1258_to_stop
0.450850207540621	E270A mutant	antisense_Rv0613c_1261_to_stop
0.532229844159759	E270A mutant	sense_Rv0613c_1063_from_start
0.380237187732318	E270A mutant	antisense_Rv0613c_1060_from_start
0.415507741672653	E270A mutant	sense_Rv0613c_433_from_start
0.44497584861174	E270A mutant	antisense_Rv0613c_430_from_start
0.38103879478089	E270A mutant	sense_Rv0628c_238_from_start
0.497671246014125	E270A mutant	antisense_Rv0628c_235_from_start
0.343005694527887	E270A mutant	sense_recB_1411_from_start
0.350736712799784	E270A mutant	antisense_recB_1408_from_start
0.382638298513372	E270A mutant	sense_Rv0633c_205_to_stop
0.470870466437498	E270A mutant	antisense_Rv0633c_208_to_stop
0.18811975174788	E270A mutant	sense_Rv0634c_283_from_start
0.284138493525667	E270A mutant	antisense_Rv0634c_280_from_start
0.44499155388709	E270A mutant	antisense_rpmG2_61_to_stop
0.499011414797851	E270A mutant	sense_rpmG2_58_to_stop
0.268860823310097	E270A mutant	sense_lipG_444_from_start
0.307871945245237	E270A mutant	antisense_lipG_441_from_start
0.372855719488305	E270A mutant	sense_Rv0647c_268_to_stop
0.388759529506407	E270A mutant	antisense_Rv0647c_271_to_stop
0.312117170390042	E270A mutant	antisense_Rv0648_1237_to_stop
0.359067052016613	E270A mutant	sense_Rv0648_1234_to_stop
0.329994750923917	E270A mutant	antisense_Rv0648_322_to_stop
0.46698135991199	E270A mutant	sense_Rv0648_319_to_stop
0.411770125118461	E270A mutant	antisense_Rv0648_88_to_stop
0.426412807254707	E270A mutant	sense_Rv0648_85_to_stop
0.215998625014358	E270A mutant	sense_vapB7_28_from_start
0.365141255626102	E270A mutant	antisense_vapB7_25_from_start
0.383234669871325	E270A mutant	antisense_atsD_1000_to_stop
0.329150327213717	E270A mutant	sense_atsD_997_to_stop
0.315432380440459	E270A mutant	antisense_atsD_416_to_stop
0.404024844604853	E270A mutant	sense_atsD_413_to_stop
0.361387197603526	E270A mutant	20_down_of_Rv0666
0.335798168800733	E270A mutant	23_down_of_Rv0666
0.417985903327314	E270A mutant	antisense_rpoB_766_from_start
0.397041555002357	E270A mutant	sense_rpoB_769_from_start
0.358339752883163	E270A mutant	antisense_rpoB_1390_from_start
0.365792121264416	E270A mutant	sense_rpoB_1393_from_start
0.477492668622038	E270A mutant	antisense_rpoB_1747_to_stop
0.439425393588521	E270A mutant	sense_rpoB_1744_to_stop
0.284384865004235	E270A mutant	antisense_rpoB_73_to_stop
0.449169793700893	E270A mutant	sense_rpoB_70_to_stop
0.234011451769145	E270A mutant	antisense_rpoC_373_from_start
0.335435274926822	E270A mutant	sense_rpoC_376_from_start
0.508242416373689	E270A mutant	antisense_rpoC_529_from_start
0.378523369424986	E270A mutant	sense_rpoC_532_from_start
0.47637931572329	E270A mutant	antisense_rpoC_550_from_start
0.291306275192395	E270A mutant	sense_rpoC_553_from_start
0.265153333025913	E270A mutant	antisense_rpoC_666_from_start
0.30457939248352	E270A mutant	sense_rpoC_669_from_start
0.353934278614303	E270A mutant	antisense_rpoC_1345_from_start
0.357154248701935	E270A mutant	sense_rpoC_1348_from_start
0.365066758183779	E270A mutant	antisense_rpoC_1411_to_stop
0.340925336840767	E270A mutant	sense_rpoC_1408_to_stop
0.347436847843522	E270A mutant	antisense_end_176_to_stop
0.317558815443668	E270A mutant	sense_end_173_to_stop
0.238028648904355	E270A mutant	antisense_fadE8_448_to_stop
0.281764646689899	E270A mutant	sense_fadE8_445_to_stop
0.358152669623976	E270A mutant	antisense_echA4_130_from_start
0.275628563966883	E270A mutant	sense_echA4_133_from_start
0.525388907434973	E270A mutant	antisense_Rv0674_13_to_stop
0.329617925825442	E270A mutant	sense_Rv0674_10_to_stop
0.306310927280968	E270A mutant	sense_mmpL5_1324_to_stop
0.301512881581358	E270A mutant	antisense_mmpL5_1327_to_stop
0.410402355935466	E270A mutant	sense_mmpL5_286_from_start
0.439471402141982	E270A mutant	antisense_mmpL5_283_from_start
0.417096316244601	E270A mutant	antisense_rpsG_217_from_start
0.473106350913708	E270A mutant	sense_rpsG_220_from_start
0.40439929644976	E270A mutant	antisense_fusA1_898_to_stop
0.375545300747848	E270A mutant	sense_fusA1_895_to_stop
0.359032700127184	E270A mutant	antisense_Rv0688_227_to_stop
0.241823537461136	E270A mutant	sense_Rv0688_224_to_stop
0.320453761956412	E270A mutant	antisense_Rv0697_367_from_start
0.335358371438573	E270A mutant	sense_Rv0697_370_from_start
0.359006936335198	E270A mutant	antisense_rplF_229_to_stop
0.476840013171316	E270A mutant	sense_rplF_226_to_stop
0.323783134356549	E270A mutant	sense_Rv0725c_39_from_start
0.430384017972056	E270A mutant	antisense_Rv0725c_36_from_start
0.400966832703956	E270A mutant	sense_serA2_464_to_stop
0.49612294157671	E270A mutant	antisense_serA2_467_to_stop
0.33174210653476	E270A mutant	antisense_xylB_136_from_start
0.410228902065239	E270A mutant	sense_xylB_139_from_start
0.35642225032263	E270A mutant	antisense_Rv0730_340_from_start
0.382905189483373	E270A mutant	sense_Rv0730_343_from_start
0.491219405065408	E270A mutant	antisense_secY_142_to_stop
0.330236359333311	E270A mutant	sense_secY_139_to_stop
0.451252446657394	E270A mutant	antisense_adk_214_to_stop
0.546231822859624	E270A mutant	sense_adk_211_to_stop
0.533463408204437	E270A mutant	antisense_adk_91_to_stop
0.319554517403537	E270A mutant	sense_adk_88_to_stop
0.341739715788806	E270A mutant	antisense_Rv0737_211_to_stop
0.305046209092248	E270A mutant	sense_Rv0737_208_to_stop
0.509057852811806	E270A mutant	26_up_of_Rv0740
0.444262233418089	E270A mutant	23_up_of_Rv0740
0.35038294142881	E270A mutant	antisense_Rv0740_175_from_start
0.268735991198822	E270A mutant	sense_Rv0740_178_from_start
0.311999411314097	E270A mutant	183_down_of_Rv0743c
0.430569509892357	E270A mutant	180_down_of_Rv0743c
0.345783941197898	E270A mutant	sense_Rv0749A_52_from_start
0.415781799643074	E270A mutant	antisense_Rv0749A_49_from_start
0.314743976791642	E270A mutant	sense_fadE9_109_to_stop
0.281742372377859	E270A mutant	antisense_fadE9_112_to_stop
0.512700706105043	E270A mutant	sense_mmsA_418_to_stop
0.483085647663368	E270A mutant	antisense_mmsA_421_to_stop
0.318097081822716	E270A mutant	antisense_PE_PGRS11_419_to_stop
0.50239642419753	E270A mutant	sense_PE_PGRS11_416_to_stop
0.397898699569359	E270A mutant	sense_PPE12_242_from_start
0.387804000610275	E270A mutant	antisense_PPE12_239_from_start
0.545978624989807	E270A mutant	antisense_phoR_424_to_stop
0.254253350485679	E270A mutant	sense_phoR_421_to_stop
0.420125810321742	E270A mutant	sense_adhB_82_to_stop
0.391618273925706	E270A mutant	antisense_adhB_85_to_stop
0.343702920590347	E270A mutant	sense_Rv0763c_61_from_start
0.429376612400098	E270A mutant	antisense_Rv0763c_58_from_start
0.365133947459566	E270A mutant	antisense_aldA_642_from_start
0.270327312395249	E270A mutant	sense_aldA_645_from_start
0.419630910935851	E270A mutant	antisense_purD_547_from_start
0.335849778830368	E270A mutant	sense_purD_550_from_start
0.312221415016167	E270A mutant	antisense_purD_373_to_stop
0.26467893110076	E270A mutant	sense_purD_370_to_stop
0.319834441027166	E270A mutant	sense_Rv0774c_53_to_stop
0.189251219671756	E270A mutant	antisense_Rv0774c_56_to_stop
0.291741517314963	E270A mutant	antisense_purC_277_from_start
0.250049727436554	E270A mutant	sense_purC_280_from_start
0.274985635771959	E270A mutant	127_down_of_Rv0781
0.352146572480653	E270A mutant	130_down_of_Rv0781
0.291095349822305	E270A mutant	sense_emrB_649_to_stop
0.235860807443992	E270A mutant	antisense_emrB_652_to_stop
0.264305254592164	E270A mutant	antisense_Rv0785_619_from_start
0.258384545020862	E270A mutant	sense_Rv0785_622_from_start
0.446721215458855	E270A mutant	antisense_Rv0787A_106_to_stop
0.303482062130342	E270A mutant	sense_Rv0787A_103_to_stop
0.334299070807785	E270A mutant	sense_Rv0802c_241_to_stop
0.344513976312409	E270A mutant	antisense_Rv0802c_244_to_stop
0.378126582978112	E270A mutant	sense_Rv0802c_106_from_start
0.416095620129977	E270A mutant	antisense_Rv0802c_103_from_start
0.4422965141633	E270A mutant	sense_Rv0802c_52_from_start
0.427386093599253	E270A mutant	antisense_Rv0802c_49_from_start
0.463520617448014	E270A mutant	antisense_Rv0804_45_from_start
0.49616684830984	E270A mutant	sense_Rv0804_48_from_start
0.394498839134968	E270A mutant	antisense_Rv0805_246_to_stop
0.392075185777365	E270A mutant	sense_Rv0805_243_to_stop
0.38180104995155	E270A mutant	sense_cpsY_103_to_stop
0.420230581791688	E270A mutant	antisense_cpsY_106_to_stop
0.374348184150974	E270A mutant	antisense_purF_247_to_stop
0.316805121307421	E270A mutant	sense_purF_244_to_stop
0.313250140841579	E270A mutant	antisense_purM_216_from_start
0.286562430054253	E270A mutant	sense_purM_219_from_start
0.344032448846134	E270A mutant	antisense_purM_460_to_stop
0.339311593750381	E270A mutant	sense_purM_457_to_stop
0.447946640178181	E270A mutant	sense_Rv0817c_355_from_start
0.463997360559453	E270A mutant	antisense_Rv0817c_352_from_start
0.274823133310904	E270A mutant	sense_Rv0817c_274_from_start
0.332141388676762	E270A mutant	antisense_Rv0817c_271_from_start
0.425006178663707	E270A mutant	9_up_of_Rv0818
0.370290603629265	E270A mutant	6_up_of_Rv0818
0.448447630340666	E270A mutant	antisense_Rv0818_112_from_start
0.404392067890163	E270A mutant	sense_Rv0818_115_from_start
0.369103319896903	E270A mutant	sense_Rv0822c_65_to_stop
0.396960226609859	E270A mutant	antisense_Rv0822c_68_to_stop
0.504505650106609	E270A mutant	sense_Rv0822c_913_to_stop
0.44355837877578	E270A mutant	antisense_Rv0822c_916_to_stop
0.332157507381906	E270A mutant	6_up_of_desA1
0.24964234872518	E270A mutant	9_up_of_desA1
0.367057780338754	E270A mutant	antisense_Rv0826_403_to_stop
0.372937709493637	E270A mutant	sense_Rv0826_400_to_stop
0.343180944862841	E270A mutant	sense_kmtR_139_to_stop
0.296484177083607	E270A mutant	antisense_kmtR_142_to_stop
0.351208830983512	E270A mutant	antisense_Rv0830_374_to_stop
0.399960313287905	E270A mutant	sense_Rv0830_371_to_stop
0.357083254716556	E270A mutant	sense_Rv0831c_406_from_start
0.398505643783	E270A mutant	antisense_Rv0831c_403_from_start
0.415398666206386	E270A mutant	sense_PE_PGRS14_819_to_stop
0.339828418611041	E270A mutant	antisense_PE_PGRS14_822_to_stop
0.460485739097513	E270A mutant	sense_PE_PGRS14_416_from_start
0.351635690922455	E270A mutant	antisense_PE_PGRS14_413_from_start
0.340381807358375	E270A mutant	119_down_of_Rv0841
0.254375440273697	E270A mutant	122_down_of_Rv0841
0.397948084025011	E270A mutant	antisense_Rv0843_46_from_start
0.503021312487899	E270A mutant	sense_Rv0843_49_from_start
0.348136041321657	E270A mutant	sense_narL_142_from_start
0.409097243924276	E270A mutant	antisense_narL_139_from_start
0.337928184651706	E270A mutant	antisense_cysK2_550_from_start
0.332885862790935	E270A mutant	sense_cysK2_553_from_start
0.345676215363605	E270A mutant	antisense_cysK2_260_to_stop
0.318258104013675	E270A mutant	sense_cysK2_257_to_stop
0.4466454315178	E270A mutant	antisense_far_217_from_start
0.418843219537907	E270A mutant	sense_far_220_from_start
0.350570955902384	E270A mutant	antisense_Rv0857_220_from_start
0.397136458115614	E270A mutant	sense_Rv0857_223_from_start
0.38490810574461	E270A mutant	antisense_Rv0859_286_from_start
0.301751106996831	E270A mutant	sense_Rv0859_289_from_start
0.376620117403466	E270A mutant	antisense_Rv0859_85_to_stop
0.392629940801871	E270A mutant	sense_Rv0859_82_to_stop
0.343982622950931	E270A mutant	antisense_fadB_352_from_start
0.209894889395725	E270A mutant	sense_fadB_355_from_start
0.455445989241502	E270A mutant	antisense_fadB_1051_to_stop
0.442345333921004	E270A mutant	sense_fadB_1048_to_stop
0.336639061252388	E270A mutant	antisense_fadB_1036_to_stop
0.354176489079098	E270A mutant	sense_fadB_1033_to_stop
0.419446150291755	E270A mutant	antisense_mog_87_to_stop
0.38165959488915	E270A mutant	sense_mog_84_to_stop
0.521988370858464	E270A mutant	sense_rpfA_219_to_stop
0.48639909815227	E270A mutant	antisense_rpfA_222_to_stop
0.302193660192198	E270A mutant	6_up_of_Rv0870c
0.347484622123594	E270A mutant	9_up_of_Rv0870c
0.307976844890126	E270A mutant	sense_PE_PGRS15_312_to_stop
0.416364172983227	E270A mutant	antisense_PE_PGRS15_315_to_stop
0.28125774193441	E270A mutant	72_up_of_PE_PGRS15
0.359618265217299	E270A mutant	75_up_of_PE_PGRS15
0.490485378892856	E270A mutant	antisense_fadE10_391_to_stop
0.303366981164056	E270A mutant	sense_fadE10_388_to_stop
0.426698499619321	E270A mutant	antisense_fadE10_154_to_stop
0.373981211953274	E270A mutant	sense_fadE10_151_to_stop
0.379826700281298	E270A mutant	antisense_fadE10_133_to_stop
0.406718896671973	E270A mutant	sense_fadE10_130_to_stop
0.3429029772701	E270A mutant	sense_Rv0874c_201_to_stop
0.326754872203004	E270A mutant	antisense_Rv0874c_204_to_stop
0.34117220001905	E270A mutant	antisense_fprB_679_to_stop
0.285545752202125	E270A mutant	sense_fprB_676_to_stop
0.451659908355247	E270A mutant	sense_Rv0890c_1068_from_start
0.437154642919561	E270A mutant	antisense_Rv0890c_1065_from_start
0.303786758036088	E270A mutant	141_up_of_Rv0892
0.232183271414951	E270A mutant	138_up_of_Rv0892
0.250271338268007	E270A mutant	18_up_of_Rv0893c
0.189794851161615	E270A mutant	21_up_of_Rv0893c
0.533229874134238	E270A mutant	antisense_gltA2_472_to_stop
0.278128777170594	E270A mutant	sense_gltA2_469_to_stop
0.404188401219566	E270A mutant	sense_prrB_55_to_stop
0.387293863771579	E270A mutant	antisense_prrB_58_to_stop
0.297512493961034	E270A mutant	sense_prrB_478_to_stop
0.339065125069312	E270A mutant	antisense_prrB_481_to_stop
0.380770438413495	E270A mutant	sense_prrB_580_to_stop
0.409638057345199	E270A mutant	antisense_prrB_583_to_stop
0.360262536378767	E270A mutant	sense_prrA_67_to_stop
0.445211673828335	E270A mutant	antisense_prrA_70_to_stop
0.381411447511872	E270A mutant	sense_prrA_274_to_stop
0.574645548133533	E270A mutant	antisense_prrA_277_to_stop
0.271489653758844	E270A mutant	antisense_echA6_335_to_stop
0.413410966090103	E270A mutant	sense_echA6_332_to_stop
0.2649230217113	E270A mutant	antisense_ctpE_1075_to_stop
0.334908092731796	E270A mutant	sense_ctpE_1072_to_stop
0.387885659196354	E270A mutant	antisense_Rv0912_139_from_start
0.392412413502048	E270A mutant	sense_Rv0912_142_from_start
0.419340727864596	E270A mutant	sense_Rv0914c_367_from_start
0.439386378452063	E270A mutant	antisense_Rv0914c_364_from_start
0.341277621658594	E270A mutant	sense_PPE14_203_to_stop
0.432460876658723	E270A mutant	antisense_PPE14_206_to_stop
0.255088491440578	E270A mutant	antisense_betP_559_from_start
0.277345918444527	E270A mutant	sense_betP_562_from_start
0.336107355970828	E270A mutant	135_down_of_betP
0.365190778784787	E270A mutant	138_down_of_betP
0.404128990876697	E270A mutant	sense_Rv0920c_562_from_start
0.385127138424885	E270A mutant	antisense_Rv0920c_559_from_start
0.314559762684685	E270A mutant	antisense_Rv0922_341_to_stop
0.30046126679663	E270A mutant	sense_Rv0922_338_to_stop
0.444614367312655	E270A mutant	sense_Rv0923c_490_to_stop
0.326872408871885	E270A mutant	antisense_Rv0923c_493_to_stop
0.369678289704872	E270A mutant	sense_mntH_275_to_stop
0.414577480094119	E270A mutant	antisense_mntH_278_to_stop
0.355798037963101	E270A mutant	sense_Rv0927c_199_to_stop
0.410019089671163	E270A mutant	antisense_Rv0927c_202_to_stop
0.346737783103837	E270A mutant	sense_pknD_907_to_stop
0.31498527492901	E270A mutant	antisense_pknD_910_to_stop
0.338791530207688	E270A mutant	sense_pstS2_153_from_start
0.329870739863138	E270A mutant	antisense_pstS2_150_from_start
0.314409013951504	E270A mutant	antisense_pstB_289_from_start
0.389929722442108	E270A mutant	sense_pstB_292_from_start
0.365390676601009	E270A mutant	antisense_pstA2_192_from_start
0.369477998965978	E270A mutant	sense_pstA2_195_from_start
0.334354447486879	E270A mutant	sense_mku_55_to_stop
0.371774665765271	E270A mutant	antisense_mku_58_to_stop
0.324850699850657	E270A mutant	antisense_ligD_322_from_start
0.261120884229803	E270A mutant	sense_ligD_325_from_start
0.302075777407394	E270A mutant	antisense_ligD_681_from_start
0.37540428894093	E270A mutant	sense_ligD_684_from_start
0.360919432469229	E270A mutant	antisense_Rv0939_520_from_start
0.273144914996411	E270A mutant	sense_Rv0939_523_from_start
0.322736978515497	E270A mutant	antisense_Rv0939_604_from_start
0.383547136716354	E270A mutant	sense_Rv0939_607_from_start
0.375304381999635	E270A mutant	antisense_Rv0939_699_from_start
0.442970300007985	E270A mutant	sense_Rv0939_702_from_start
0.407092095899477	E270A mutant	antisense_Rv0939_859_from_start
0.314924426912084	E270A mutant	sense_Rv0939_862_from_start
0.264758789353794	E270A mutant	sense_Rv0940c_34_to_stop
0.195263835434992	E270A mutant	antisense_Rv0940c_37_to_stop
0.295091148037814	E270A mutant	sense_Rv0941c_105_from_start
0.293619390515295	E270A mutant	antisense_Rv0941c_102_from_start
0.398942397297462	E270A mutant	antisense_Rv0942_43_to_stop
0.418460196460152	E270A mutant	sense_Rv0942_40_to_stop
0.248296946300053	E270A mutant	antisense_Rv0945_202_to_stop
0.320529676553108	E270A mutant	sense_Rv0945_199_to_stop
0.273281387773893	E270A mutant	sense_pgi_649_from_start
0.271101616851647	E270A mutant	antisense_pgi_646_from_start
0.515411156843957	E270A mutant	29_up_of_Rv0947c
0.555436787978365	E270A mutant	32_up_of_Rv0947c
0.216225230915859	E270A mutant	sense_Rv0950c_191_from_start
0.388978807916833	E270A mutant	antisense_Rv0950c_188_from_start
0.40985314727809	E270A mutant	antisense_sucC_466_to_stop
0.408580269176189	E270A mutant	sense_sucC_463_to_stop
0.42498485213466	E270A mutant	antisense_sucD_79_to_stop
0.286535038774965	E270A mutant	sense_sucD_76_to_stop
0.486182756699976	E270A mutant	antisense_Rv0954_66_to_stop
0.326242586217588	E270A mutant	sense_Rv0954_63_to_stop
0.281062704700459	E270A mutant	antisense_Rv0958_619_to_stop
0.494185554837105	E270A mutant	sense_Rv0958_616_to_stop
0.459095475862215	E270A mutant	antisense_Rv0958_613_to_stop
0.426803670590241	E270A mutant	sense_Rv0958_610_to_stop
0.358198692463658	E270A mutant	antisense_Rv0959_982_from_start
0.461508782871263	E270A mutant	sense_Rv0959_985_from_start
0.331486102538585	E270A mutant	antisense_Rv0959_262_to_stop
0.486683369149142	E270A mutant	sense_Rv0959_259_to_stop
0.311799917926967	E270A mutant	antisense_csoR_88_from_start
0.311515777373636	E270A mutant	sense_csoR_91_from_start
0.395889966140349	E270A mutant	antisense_csoR_148_from_start
0.361508567959179	E270A mutant	sense_csoR_151_from_start
0.47659203634546	E270A mutant	antisense_ctpV_835_from_start
0.41617323163162	E270A mutant	sense_ctpV_838_from_start
0.381217794060725	E270A mutant	antisense_ctpV_194_to_stop
0.509995337207112	E270A mutant	sense_ctpV_191_to_stop
0.257857245534411	E270A mutant	sense_accA2_151_to_stop
0.310733601374072	E270A mutant	antisense_accA2_154_to_stop
0.390163372481472	E270A mutant	sense_accA2_847_from_start
0.353570236561493	E270A mutant	antisense_accA2_844_from_start
0.290027890443145	E270A mutant	sense_accD2_208_from_start
0.3270863800582	E270A mutant	antisense_accD2_205_from_start
0.340147155908691	E270A mutant	antisense_PE_PGRS16_327_to_stop
0.413425386284396	E270A mutant	sense_PE_PGRS16_324_to_stop
0.44678786710844	E270A mutant	antisense_mprA_205_to_stop
0.319183986534568	E270A mutant	sense_mprA_202_to_stop
0.325420920982065	E270A mutant	antisense_mprB_532_to_stop
0.300401939886511	E270A mutant	sense_mprB_529_to_stop
0.376530878046618	E270A mutant	antisense_pepD_177_to_stop
0.295530559545113	E270A mutant	sense_pepD_174_to_stop
0.384415368275227	E270A mutant	sense_Rv0992c_109_from_start
0.260099762998128	E270A mutant	antisense_Rv0992c_106_from_start
0.35912986432924	E270A mutant	antisense_galU_235_from_start
0.301464817536304	E270A mutant	sense_galU_238_from_start
0.411140840770495	E270A mutant	antisense_galU_442_from_start
0.352975494801639	E270A mutant	sense_galU_445_from_start
0.494113917465635	E270A mutant	antisense_Rv0996_103_to_stop
0.358961229294625	E270A mutant	sense_Rv0996_100_to_stop
0.351853058163108	E270A mutant	antisense_Rv0996_67_to_stop
0.288424256644605	E270A mutant	sense_Rv0996_64_to_stop
0.332177290685898	E270A mutant	sense_Rv1002c_25_to_stop
0.331600999038922	E270A mutant	antisense_Rv1002c_28_to_stop
0.383813519469051	E270A mutant	sense_Rv1004c_628_from_start
0.416357410345471	E270A mutant	antisense_Rv1004c_625_from_start
0.381281640773437	E270A mutant	sense_metS_325_to_stop
0.382885933674749	E270A mutant	antisense_metS_328_to_stop
0.379634039641332	E270A mutant	antisense_tatD_121_from_start
0.363816103627951	E270A mutant	sense_tatD_124_from_start
0.297654977992001	E270A mutant	sense_pth_41_from_start
0.378880061106647	E270A mutant	antisense_pth_38_from_start
0.355026146102191	E270A mutant	sense_rplY_82_to_stop
0.376801524936284	E270A mutant	antisense_rplY_85_to_stop
0.548429831379425	E270A mutant	sense_rplY_136_from_start
0.315799402903715	E270A mutant	antisense_rplY_133_from_start
0.439198513523333	E270A mutant	sense_glmU_311_to_stop
0.389098968776862	E270A mutant	antisense_glmU_314_to_stop
0.295138864879609	E270A mutant	antisense_Rv1019_201_to_stop
0.278271210617998	E270A mutant	sense_Rv1019_198_to_stop
0.395493875746876	E270A mutant	antisense_Rv1019_31_to_stop
0.410877334310129	E270A mutant	sense_Rv1019_28_to_stop
0.3567087884986	E270A mutant	antisense_mfd_1405_from_start
0.413238360031789	E270A mutant	sense_mfd_1408_from_start
0.447991147567321	E270A mutant	antisense_mfd_1654_from_start
0.480655989345585	E270A mutant	sense_mfd_1657_from_start
0.643016011727021	E270A mutant	antisense_mfd_1783_to_stop
0.359099513073011	E270A mutant	sense_mfd_1780_to_stop
0.324109447719713	E270A mutant	antisense_mfd_613_to_stop
0.35118871527192	E270A mutant	sense_mfd_610_to_stop
0.422988239054147	E270A mutant	antisense_mfd_472_to_stop
0.387209772999907	E270A mutant	sense_mfd_469_to_stop
0.309740715575624	E270A mutant	antisense_Rv1021_349_from_start
0.345032927610476	E270A mutant	sense_Rv1021_352_from_start
0.269057377289415	E270A mutant	antisense_lpqU_229_from_start
0.346649180129347	E270A mutant	sense_lpqU_232_from_start
0.321769190896568	E270A mutant	antisense_Rv1024_304_to_stop
0.333260432708255	E270A mutant	sense_Rv1024_301_to_stop
0.259917914731253	E270A mutant	antisense_Rv1024_225_to_stop
0.284995902168953	E270A mutant	sense_Rv1024_222_to_stop
0.31185998014279	E270A mutant	5_up_of_Rv1025
0.31119914945025	E270A mutant	2_up_of_Rv1025
0.276682658551704	E270A mutant	antisense_Rv1026_334_to_stop
0.269803637189952	E270A mutant	sense_Rv1026_331_to_stop
0.236165515137018	E270A mutant	sense_kdpD_322_to_stop
0.301409025167815	E270A mutant	antisense_kdpD_325_to_stop
0.286791747466152	E270A mutant	sense_kdpD_715_from_start
0.34220422476043	E270A mutant	antisense_kdpD_712_from_start
0.359161753783476	E270A mutant	sense_kdpD_160_from_start
0.397020663441185	E270A mutant	antisense_kdpD_157_from_start
0.33819936460026	E270A mutant	antisense_kdpA_634_from_start
0.317230104695821	E270A mutant	sense_kdpA_637_from_start
0.375854583258751	E270A mutant	antisense_kdpA_721_to_stop
0.434535213412971	E270A mutant	sense_kdpA_718_to_stop
0.402277996723519	E270A mutant	sense_trcS_280_from_start
0.391212755506739	E270A mutant	antisense_trcS_277_from_start
0.269415747519244	E270A mutant	sense_trcR_323_to_stop
0.298091741849494	E270A mutant	antisense_trcR_326_to_stop
0.433442059835015	E270A mutant	sense_esxI_11_to_stop
0.471209378107433	E270A mutant	antisense_esxI_14_to_stop
0.316697387008059	E270A mutant	sense_esxI_73_from_start
0.349158287628178	E270A mutant	antisense_esxI_70_from_start
0.432099265402162	E270A mutant	sense_esxJ_135_from_start
0.315446861489144	E270A mutant	antisense_esxJ_132_from_start
0.30349554543216	E270A mutant	583_down_of_Rv1041c
0.3020848346659	E270A mutant	580_down_of_Rv1041c
0.311310730227066	E270A mutant	305_down_of_Rv1041c
0.331367215628158	E270A mutant	302_down_of_Rv1041c
0.245472442248636	E270A mutant	antisense_Rv1044_226_to_stop
0.336204120695004	E270A mutant	sense_Rv1044_223_to_stop
0.378963521563208	E270A mutant	antisense_Rv1045_100_to_stop
0.327718907653726	E270A mutant	sense_Rv1045_97_to_stop
0.539467894456699	E270A mutant	32_up_of_Rv1048c
0.606397951916972	E270A mutant	35_up_of_Rv1048c
0.300556408851144	E270A mutant	7_up_of_Rv1049
0.261531911695498	E270A mutant	4_up_of_Rv1049
0.361059335315782	E270A mutant	antisense_Rv1050_48_from_start
0.465541479705586	E270A mutant	sense_Rv1050_51_from_start
0.388964285386099	E270A mutant	antisense_Rv1050_340_from_start
0.246861428050421	E270A mutant	sense_Rv1050_343_from_start
0.287251762812184	E270A mutant	antisense_Rv1056_223_to_stop
0.346503994229964	E270A mutant	sense_Rv1056_220_to_stop
0.442155710957764	E270A mutant	89_up_of_Rv1057
0.427780372628052	E270A mutant	86_up_of_Rv1057
0.366330245830277	E270A mutant	antisense_Rv1066_22_from_start
0.350154089728287	E270A mutant	sense_Rv1066_25_from_start
0.407261240301314	E270A mutant	sense_Rv1069c_742_to_stop
0.429157889403569	E270A mutant	antisense_Rv1069c_745_to_stop
0.441299498370187	E270A mutant	sense_echA9_506_from_start
0.289371722586969	E270A mutant	antisense_echA9_503_from_start
0.490484768939414	E270A mutant	antisense_mca_325_from_start
0.337285168682244	E270A mutant	sense_mca_328_from_start
0.429307849361807	E270A mutant	antisense_Rv1084_685_from_start
0.316594459144089	E270A mutant	sense_Rv1084_688_from_start
0.52147044982606	E270A mutant	antisense_Rv1084_625_to_stop
0.561865144655013	E270A mutant	sense_Rv1084_622_to_stop
0.328189990050898	E270A mutant	antisense_Rv1086_351_from_start
0.372610957296035	E270A mutant	sense_Rv1086_354_from_start
0.337223837237454	E270A mutant	antisense_Rv1090_152_to_stop
0.572864534253694	E270A mutant	sense_Rv1090_149_to_stop
0.439425374350669	E270A mutant	antisense_Rv1090_53_to_stop
0.434862216298566	E270A mutant	sense_Rv1090_50_to_stop
0.437876171430133	E270A mutant	sense_coaA_337_to_stop
0.556874191485352	E270A mutant	antisense_coaA_340_to_stop
0.429496346447062	E270A mutant	antisense_glyA1_79_from_start
0.321898926389067	E270A mutant	sense_glyA1_82_from_start
0.468176126286026	E270A mutant	antisense_phoH2_505_to_stop
0.446121632123402	E270A mutant	sense_phoH2_502_to_stop
0.25723090653775	E270A mutant	antisense_phoH2_241_to_stop
0.379590037204335	E270A mutant	sense_phoH2_238_to_stop
0.323687578064798	E270A mutant	antisense_Rv1096_369_from_start
0.392161824199481	E270A mutant	sense_Rv1096_372_from_start
0.341939524492346	E270A mutant	antisense_Rv1096_269_to_stop
0.290639829469767	E270A mutant	sense_Rv1096_266_to_stop
0.506989697848009	E270A mutant	antisense_Rv1100_36_from_start
0.428350647327451	E270A mutant	sense_Rv1100_39_from_start
0.432151575025594	E270A mutant	sense_Rv1106c_172_from_start
0.466049520700155	E270A mutant	antisense_Rv1106c_169_from_start
0.393596222169605	E270A mutant	sense_xseB_115_from_start
0.310172562614497	E270A mutant	antisense_xseB_112_from_start
0.285247404411086	E270A mutant	sense_Rv1109c_187_from_start
0.478833614312341	E270A mutant	antisense_Rv1109c_184_from_start
0.396338701207187	E270A mutant	antisense_lytB2_103_to_stop
0.286428070662244	E270A mutant	sense_lytB2_100_to_stop
0.358689603727519	E270A mutant	antisense_Rv1112_418_from_start
0.258233842525382	E270A mutant	sense_Rv1112_421_from_start
0.331831940330273	E270A mutant	antisense_Rv1112_439_from_start
0.305256185994724	E270A mutant	sense_Rv1112_442_from_start
0.340665427283307	E270A mutant	antisense_Rv1112_325_to_stop
0.368512056470769	E270A mutant	sense_Rv1112_322_to_stop
0.387397328606154	E270A mutant	sense_Rv1118c_71_to_stop
0.350524899496931	E270A mutant	antisense_Rv1118c_74_to_stop
0.306627885962171	E270A mutant	13_up_of_zwf1
0.251078790784406	E270A mutant	10_up_of_zwf1
0.283731153438988	E270A mutant	antisense_zwf1_541_from_start
0.329529576880878	E270A mutant	sense_zwf1_544_from_start
0.424578298590212	E270A mutant	8_up_of_bpoB
0.520021675057652	E270A mutant	11_up_of_bpoB
0.297455793135524	E270A mutant	antisense_Rv1125_397_to_stop
0.276377339564268	E270A mutant	sense_Rv1125_394_to_stop
0.286904206815126	E270A mutant	sense_Rv1128c_448_from_start
0.350147996341241	E270A mutant	antisense_Rv1128c_445_from_start
0.279720028714632	E270A mutant	sense_Rv1128c_118_from_start
0.315229979663317	E270A mutant	antisense_Rv1128c_115_from_start
0.2112351736791	E270A mutant	antisense_prpD_708_from_start
0.359570109816079	E270A mutant	sense_prpD_711_from_start
0.345175617174052	E270A mutant	antisense_prpC_289_to_stop
0.229122622025171	E270A mutant	sense_prpC_286_to_stop
0.270114483422978	E270A mutant	antisense_Rv1132_10_from_start
0.239325430697117	E270A mutant	sense_Rv1132_13_from_start
0.350556594034804	E270A mutant	antisense_Rv1132_712_to_stop
0.34539204200572	E270A mutant	sense_Rv1132_709_to_stop
0.32685764786655	E270A mutant	antisense_Rv1132_427_to_stop
0.385154779854979	E270A mutant	sense_Rv1132_424_to_stop
0.367243907824077	E270A mutant	sense_metE_913_from_start
0.4458024135924	E270A mutant	antisense_metE_910_from_start
0.191820514344136	E270A mutant	sense_metE_343_from_start
0.32144297776087	E270A mutant	antisense_metE_340_from_start
0.433229441700595	E270A mutant	sense_metE_130_from_start
0.51145444710812	E270A mutant	antisense_metE_127_from_start
0.226378813134746	E270A mutant	sense_Rv1148c_269_to_stop
0.366998372347377	E270A mutant	antisense_Rv1148c_272_to_stop
0.358786573032353	E270A mutant	sense_Rv1154c_250_from_start
0.493019813829143	E270A mutant	antisense_Rv1154c_247_from_start
0.331074824855953	E270A mutant	60_down_of_Rv1157c
0.373674619452743	E270A mutant	57_down_of_Rv1157c
0.47161400100783	E270A mutant	antisense_narG_43_from_start
0.36145493010574	E270A mutant	sense_narG_46_from_start
0.363541149435913	E270A mutant	antisense_narG_1742_to_stop
0.359927750306449	E270A mutant	sense_narG_1739_to_stop
0.274864683066469	E270A mutant	antisense_narG_784_to_stop
0.344334597663906	E270A mutant	sense_narG_781_to_stop
0.257335032954164	E270A mutant	antisense_typA_136_from_start
0.400143984735019	E270A mutant	sense_typA_139_from_start
0.585608442482138	E270A mutant	antisense_lpqW_772_to_stop
0.40128267263003	E270A mutant	sense_lpqW_769_to_stop
0.388380739776529	E270A mutant	sense_PPE17_265_to_stop
0.445809650780349	E270A mutant	antisense_PPE17_268_to_stop
0.285682341107925	E270A mutant	sense_PE12_426_from_start
0.428298037156329	E270A mutant	antisense_PE12_423_from_start
0.293269052727661	E270A mutant	antisense_fbiC_544_from_start
0.301822494944176	E270A mutant	sense_fbiC_547_from_start
0.290271751822564	E270A mutant	antisense_fbiC_643_from_start
0.295900636888781	E270A mutant	sense_fbiC_646_from_start
0.40457565085864	E270A mutant	sense_fadH_118_to_stop
0.275682035632954	E270A mutant	antisense_fadH_121_to_stop
0.296049291318711	E270A mutant	sense_Rv1176c_13_to_stop
0.311386309371634	E270A mutant	antisense_Rv1176c_16_to_stop
0.359277258939869	E270A mutant	sense_Rv1176c_178_from_start
0.430147636762312	E270A mutant	antisense_Rv1176c_175_from_start
0.305166801170849	E270A mutant	antisense_pks3_3021_to_stop
0.368424696017807	E270A mutant	sense_pks3_3018_to_stop
0.295273236065325	E270A mutant	antisense_pks3_1781_to_stop
0.313011586326763	E270A mutant	sense_pks3_1778_to_stop
0.215554608025449	E270A mutant	antisense_pks3_646_to_stop
0.252695952644496	E270A mutant	sense_pks3_643_to_stop
0.233374735905693	E270A mutant	antisense_papA3_462_to_stop
0.232041700783138	E270A mutant	sense_papA3_459_to_stop
0.220474063794371	E270A mutant	antisense_mmpL10_108_from_start
0.341021321511229	E270A mutant	sense_mmpL10_111_from_start
0.217190955625583	E270A mutant	antisense_mmpL10_1288_from_start
0.290983845178727	E270A mutant	sense_mmpL10_1291_from_start
0.307933465988131	E270A mutant	antisense_mmpL10_431_to_stop
0.341270136839657	E270A mutant	sense_mmpL10_428_to_stop
0.295628433828597	E270A mutant	antisense_mmpL10_236_to_stop
0.24507269708598	E270A mutant	sense_mmpL10_233_to_stop
0.295321461713936	E270A mutant	antisense_sigI_188_to_stop
0.313876994340884	E270A mutant	sense_sigI_185_to_stop
0.474680204253789	E270A mutant	antisense_Rv1190_156_from_start
0.520757360854115	E270A mutant	sense_Rv1190_159_from_start
0.367434217911926	E270A mutant	antisense_Rv1190_323_to_stop
0.367462465598771	E270A mutant	sense_Rv1190_320_to_stop
0.30333227192225	E270A mutant	sense_Rv1194c_618_from_start
0.240141636301553	E270A mutant	antisense_Rv1194c_615_from_start
0.317435851627287	E270A mutant	antisense_esxK_132_from_start
0.380142460760634	E270A mutant	sense_esxK_135_from_start
0.360749418478229	E270A mutant	antisense_esxL_70_from_start
0.30272750561644	E270A mutant	sense_esxL_73_from_start
0.43396866574047	E270A mutant	antisense_esxL_14_to_stop
0.502720070773919	E270A mutant	sense_esxL_11_to_stop
0.479733501209738	E270A mutant	sense_dapD_17_from_start
0.423728387822993	E270A mutant	antisense_dapD_14_from_start
0.411676378639292	E270A mutant	sense_Rv1203c_61_from_start
0.367219478120086	E270A mutant	antisense_Rv1203c_58_from_start
0.302296986310062	E270A mutant	sense_Rv1204c_173_from_start
0.275463460582997	E270A mutant	antisense_Rv1204c_170_from_start
0.32033730315839	E270A mutant	antisense_tagA_139_from_start
0.305072987938745	E270A mutant	sense_tagA_142_from_start
0.290085552867966	E270A mutant	antisense_Rv1211_45_from_start
0.298066519499118	E270A mutant	sense_Rv1211_48_from_start
0.264213900959723	E270A mutant	antisense_glgC_544_from_start
0.319862243686758	E270A mutant	sense_glgC_547_from_start
0.337640633057652	E270A mutant	antisense_glgC_73_to_stop
0.361592329977265	E270A mutant	sense_glgC_70_to_stop
0.2956798880576	E270A mutant	sense_Rv1215c_70_from_start
0.302939310399487	E270A mutant	antisense_Rv1215c_67_from_start
0.335848865839355	E270A mutant	sense_Rv1217c_133_to_stop
0.360517559147783	E270A mutant	antisense_Rv1217c_136_to_stop
0.463898018945059	E270A mutant	sense_Rv1218c_70_to_stop
0.433103499039049	E270A mutant	antisense_Rv1218c_73_to_stop
0.36693973251247	E270A mutant	sense_Rv1219c_88_to_stop
0.32443649000329	E270A mutant	antisense_Rv1219c_91_to_stop
0.494970111295359	E270A mutant	antisense_rseA_108_to_stop
0.346572163799382	E270A mutant	sense_rseA_105_to_stop
0.454199170916248	E270A mutant	sense_Rv1232c_583_to_stop
0.475512515641771	E270A mutant	antisense_Rv1232c_586_to_stop
0.277024291463962	E270A mutant	sense_corA_86_to_stop
0.453256729149724	E270A mutant	antisense_corA_89_to_stop
0.471354611817647	E270A mutant	38_up_of_corA
0.496889927349742	E270A mutant	41_up_of_corA
0.364622441465795	E270A mutant	antisense_mdh_307_from_start
0.381576154545939	E270A mutant	sense_mdh_310_from_start
0.618204479554505	E270A mutant	antisense_vapB33_43_to_stop
0.407169510033431	E270A mutant	sense_vapB33_40_to_stop
0.320367966179205	E270A mutant	sense_Rv1245c_407_to_stop
0.271953116356326	E270A mutant	antisense_Rv1245c_410_to_stop
0.25265164905236	E270A mutant	sense_relB_112_to_stop
0.448557636819497	E270A mutant	antisense_relB_115_to_stop
0.399966448716227	E270A mutant	sense_Rv1248c_400_to_stop
0.416509973167916	E270A mutant	antisense_Rv1248c_403_to_stop
0.326467183501296	E270A mutant	sense_Rv1248c_1090_to_stop
0.387247180747057	E270A mutant	antisense_Rv1248c_1093_to_stop
0.409509326090591	E270A mutant	sense_Rv1248c_1252_to_stop
0.415184014199024	E270A mutant	antisense_Rv1248c_1255_to_stop
0.289818597191862	E270A mutant	sense_Rv1248c_1846_from_start
0.244526505455624	E270A mutant	antisense_Rv1248c_1843_from_start
0.270515218036645	E270A mutant	sense_Rv1248c_1825_from_start
0.338554015162007	E270A mutant	antisense_Rv1248c_1822_from_start
0.287168790902104	E270A mutant	sense_Rv1248c_1071_from_start
0.339973481220472	E270A mutant	antisense_Rv1248c_1068_from_start
0.396488567942598	E270A mutant	antisense_Rv1250_790_from_start
0.304960404491321	E270A mutant	sense_Rv1250_793_from_start
0.302602785219104	E270A mutant	sense_Rv1251c_1312_from_start
0.295663071129823	E270A mutant	antisense_Rv1251c_1309_from_start
0.386503869098732	E270A mutant	sense_Rv1257c_622_to_stop
0.465510081529586	E270A mutant	antisense_Rv1257c_625_to_stop
0.334010678332843	E270A mutant	antisense_Rv1264_448_from_start
0.281211830624855	E270A mutant	sense_Rv1264_451_from_start
0.366263008757417	E270A mutant	sense_Rv1272c_571_from_start
0.371334816730923	E270A mutant	antisense_Rv1272c_568_from_start
0.245760458619677	E270A mutant	antisense_Rv1278_1161_to_stop
0.27037523084645	E270A mutant	sense_Rv1278_1158_to_stop
0.311611797627245	E270A mutant	sense_Rv1290c_423_from_start
0.297036031352775	E270A mutant	antisense_Rv1290c_420_from_start
0.417057718987487	E270A mutant	antisense_fadA4_100_from_start
0.379098594956031	E270A mutant	sense_fadA4_103_from_start
0.262117109784898	E270A mutant	antisense_Rv1324_406_from_start
0.345707248080379	E270A mutant	sense_Rv1324_409_from_start
0.271284577145064	E270A mutant	antisense_Rv1324_114_to_stop
0.261259738202331	E270A mutant	sense_Rv1324_111_to_stop
0.366399787700679	E270A mutant	sense_PE_PGRS24_617_to_stop
0.396829069824873	E270A mutant	antisense_PE_PGRS24_620_to_stop
0.264955617566805	E270A mutant	antisense_glgP_352_from_start
0.288278891526438	E270A mutant	sense_glgP_355_from_start
0.287541703741282	E270A mutant	antisense_glgP_610_to_stop
0.315464297485005	E270A mutant	sense_glgP_607_to_stop
0.450701899824447	E270A mutant	sense_dinG_862_to_stop
0.386195585062515	E270A mutant	antisense_dinG_865_to_stop
0.383720091319498	E270A mutant	antisense_cysO_103_from_start
0.433812519024744	E270A mutant	sense_cysO_106_from_start
0.296649935352462	E270A mutant	antisense_cysM_223_from_start
0.375194680736781	E270A mutant	sense_cysM_226_from_start
0.346779676584065	E270A mutant	antisense_murI_197_to_stop
0.325602626541721	E270A mutant	sense_murI_194_to_stop
0.461099401175348	E270A mutant	antisense_mbtL_37_to_stop
0.388423055600935	E270A mutant	sense_mbtL_34_to_stop
0.303023521661769	E270A mutant	antisense_mbtM_16_to_stop
0.252811679712057	E270A mutant	sense_mbtM_13_to_stop
0.44375400957301	E270A mutant	antisense_irtA_717_to_stop
0.325160732967966	E270A mutant	sense_irtA_714_to_stop
0.365817742783653	E270A mutant	sense_Rv1356c_12_to_stop
0.269145062585767	E270A mutant	antisense_Rv1356c_15_to_stop
0.329158606749064	E270A mutant	sense_Rv1357c_269_to_stop
0.270824675406092	E270A mutant	antisense_Rv1357c_272_to_stop
0.270591130806679	E270A mutant	108_up_of_Rv1357c
0.280808729280143	E270A mutant	111_up_of_Rv1357c
0.211738458872579	E270A mutant	antisense_Rv1359_131_from_start
0.300797844383772	E270A mutant	sense_Rv1359_134_from_start
0.233466739648424	E270A mutant	antisense_Rv1359_316_from_start
0.342311872217681	E270A mutant	sense_Rv1359_319_from_start
0.527495720164071	E270A mutant	sense_Rv1364c_199_from_start
0.358463486222512	E270A mutant	antisense_Rv1364c_196_from_start
0.451852247138732	E270A mutant	antisense_Rv1375_412_to_stop
0.449283608270728	E270A mutant	sense_Rv1375_409_to_stop
0.466357718858712	E270A mutant	sense_Rv1377c_85_to_stop
0.309650265705166	E270A mutant	antisense_Rv1377c_88_to_stop
0.457505355046596	E270A mutant	sense_Rv1378c_217_from_start
0.43069731556245	E270A mutant	antisense_Rv1378c_214_from_start
0.270329962169989	E270A mutant	antisense_pyrC_184_to_stop
0.382042424240151	E270A mutant	sense_pyrC_181_to_stop
0.285103481999437	E270A mutant	antisense_Rv1382_16_to_stop
0.422899057219867	E270A mutant	sense_Rv1382_13_to_stop
0.241034229445302	E270A mutant	antisense_carB_1216_from_start
0.256285190123665	E270A mutant	sense_carB_1219_from_start
0.371711577660495	E270A mutant	antisense_pyrF_226_from_start
0.376171794275573	E270A mutant	sense_pyrF_229_from_start
0.345813536518188	E270A mutant	antisense_PPE20_477_from_start
0.366806858917481	E270A mutant	sense_PPE20_480_from_start
0.358441193022968	E270A mutant	antisense_dfp_541_from_start
0.333384930143864	E270A mutant	sense_dfp_544_from_start
0.46055350943051	E270A mutant	antisense_metK_580_to_stop
0.400384962504469	E270A mutant	sense_metK_577_to_stop
0.397677698361702	E270A mutant	sense_cyp132_556_from_start
0.423327588519367	E270A mutant	antisense_cyp132_553_from_start
0.296628377612299	E270A mutant	antisense_priA_585_to_stop
0.448023185400132	E270A mutant	sense_priA_582_to_stop
0.300805554615426	E270A mutant	antisense_priA_259_to_stop
0.280725223835383	E270A mutant	sense_priA_256_to_stop
0.305323685788474	E270A mutant	antisense_priA_109_to_stop
0.243179555133725	E270A mutant	sense_priA_106_to_stop
0.450523548788696	E270A mutant	sense_Rv1403c_289_from_start
0.451044985055841	E270A mutant	antisense_Rv1403c_286_from_start
0.291625167210055	E270A mutant	antisense_rpe_319_to_stop
0.3553144958499	E270A mutant	sense_rpe_316_to_stop
0.345330661952357	E270A mutant	antisense_ribG_500_to_stop
0.310924312285327	E270A mutant	sense_ribG_497_to_stop
0.286437219248719	E270A mutant	antisense_ribG_485_to_stop
0.334025446522315	E270A mutant	sense_ribG_482_to_stop
0.28150396274689	E270A mutant	antisense_Rv1422_421_from_start
0.305955640691424	E270A mutant	sense_Rv1422_424_from_start
0.247738112672245	E270A mutant	antisense_whiA_157_to_stop
0.413858936069507	E270A mutant	sense_whiA_154_to_stop
0.322705518907656	E270A mutant	antisense_Rv1425_601_from_start
0.250772407262457	E270A mutant	sense_Rv1425_604_from_start
0.480003713993221	E270A mutant	antisense_Rv1425_19_to_stop
0.442041727833137	E270A mutant	sense_Rv1425_16_to_stop
0.346413146654364	E270A mutant	antisense_Rv1429_221_from_start
0.288907521358082	E270A mutant	sense_Rv1429_224_from_start
0.35560761417511	E270A mutant	antisense_Rv1429_349_from_start
0.351516475761583	E270A mutant	sense_Rv1429_352_from_start
0.263682401123688	E270A mutant	antisense_Rv1429_49_to_stop
0.346731831286727	E270A mutant	sense_Rv1429_46_to_stop
0.269513080048481	E270A mutant	antisense_Rv1432_88_from_start
0.324034291799881	E270A mutant	sense_Rv1432_91_from_start
0.305997339961986	E270A mutant	antisense_pgk_284_from_start
0.271355521162679	E270A mutant	sense_pgk_287_from_start
0.278813388990646	E270A mutant	antisense_pgk_352_from_start
0.291729545336179	E270A mutant	sense_pgk_355_from_start
0.379268880604475	E270A mutant	antisense_pgk_565_from_start
0.447836081635087	E270A mutant	sense_pgk_568_from_start
0.355832647574377	E270A mutant	antisense_bisC_1066_to_stop
0.322993083789967	E270A mutant	sense_bisC_1063_to_stop
0.198654335773264	E270A mutant	22_down_of_Rv1444c
0.300330229955105	E270A mutant	19_down_of_Rv1444c
0.365796317046179	E270A mutant	sense_opcA_389_to_stop
0.315961928112455	E270A mutant	antisense_opcA_392_to_stop
0.350849176301941	E270A mutant	sense_zwf2_376_from_start
0.279771871628556	E270A mutant	antisense_zwf2_373_from_start
0.291882261171726	E270A mutant	sense_zwf2_216_from_start
0.387020365076045	E270A mutant	antisense_zwf2_213_from_start
0.359031652843663	E270A mutant	sense_tal_37_to_stop
0.365768427109864	E270A mutant	antisense_tal_40_to_stop
0.339619912536212	E270A mutant	sense_tkt_238_to_stop
0.287072268425488	E270A mutant	antisense_tkt_241_to_stop
0.216726409350424	E270A mutant	antisense_Rv1461_416_from_start
0.340020216152768	E270A mutant	sense_Rv1461_419_from_start
0.244394274821446	E270A mutant	antisense_Rv1461_472_from_start
0.348647681252763	E270A mutant	sense_Rv1461_475_from_start
0.316970197347613	E270A mutant	antisense_Rv1461_49_to_stop
0.479759602416302	E270A mutant	sense_Rv1461_46_to_stop
0.246894878414691	E270A mutant	antisense_Rv1462_472_to_stop
0.340493951562335	E270A mutant	sense_Rv1462_469_to_stop
0.339384090542598	E270A mutant	antisense_Rv1462_250_to_stop
0.214142590877762	E270A mutant	sense_Rv1462_247_to_stop
0.337958523895479	E270A mutant	74_up_of_csd
0.393989433597249	E270A mutant	71_up_of_csd
0.271355125868068	E270A mutant	antisense_Rv1465_13_from_start
0.386349906830112	E270A mutant	sense_Rv1465_16_from_start
0.328497254107543	E270A mutant	sense_fadE15_269_to_stop
0.367516830193239	E270A mutant	antisense_fadE15_272_to_stop
0.231433027385507	E270A mutant	sense_PE_PGRS29_423_to_stop
0.287088611592903	E270A mutant	antisense_PE_PGRS29_426_to_stop
0.333963896870644	E270A mutant	antisense_moxR1_127_from_start
0.347130278328149	E270A mutant	sense_moxR1_130_from_start
0.382425619843876	E270A mutant	antisense_Rv1481_157_from_start
0.348576126566964	E270A mutant	sense_Rv1481_160_from_start
0.419364941522598	E270A mutant	antisense_hemZ_70_from_start
0.376747226053393	E270A mutant	sense_hemZ_73_from_start
0.318812537948412	E270A mutant	antisense_hemZ_193_from_start
0.368850264763273	E270A mutant	sense_hemZ_196_from_start
0.252769725268641	E270A mutant	antisense_hemZ_367_to_stop
0.341168231640976	E270A mutant	sense_hemZ_364_to_stop
0.274471367359546	E270A mutant	antisense_Rv1487_178_to_stop
0.396179042523515	E270A mutant	sense_Rv1487_175_to_stop
0.349669489160132	E270A mutant	antisense_Rv1488_391_from_start
0.418110332700357	E270A mutant	sense_Rv1488_394_from_start
0.292532313164227	E270A mutant	antisense_mutB_541_to_stop
0.375727506938339	E270A mutant	sense_mutB_538_to_stop
0.435429460996747	E270A mutant	antisense_Rv1496_421_to_stop
0.408127296623172	E270A mutant	sense_Rv1496_418_to_stop
0.320768155645618	E270A mutant	antisense_Rv1496_28_to_stop
0.271115305125095	E270A mutant	sense_Rv1496_25_to_stop
0.379142681806201	E270A mutant	sense_Rv1498A_10_to_stop
0.290769893730023	E270A mutant	antisense_Rv1498A_13_to_stop
0.495555092244739	E270A mutant	antisense_Rv1500_49_from_start
0.362038346446174	E270A mutant	sense_Rv1500_52_from_start
0.331161449027604	E270A mutant	antisense_Rv1500_142_from_start
0.305114643802041	E270A mutant	sense_Rv1500_145_from_start
0.2474399157217	E270A mutant	antisense_Rv1501_115_to_stop
0.242017001710821	E270A mutant	sense_Rv1501_112_to_stop
0.228858288082757	E270A mutant	antisense_Rv1502_10_to_stop
0.243046458092256	E270A mutant	sense_Rv1502_7_to_stop
0.252382756464881	E270A mutant	antisense_Rv1507A_120_from_start
0.208866763367155	E270A mutant	sense_Rv1507A_123_from_start
0.270629293619249	E270A mutant	sense_Rv1508c_733_from_start
0.284118497444614	E270A mutant	antisense_Rv1508c_730_from_start
0.2981840575146	E270A mutant	antisense_Rv1510_88_to_stop
0.350820187837862	E270A mutant	sense_Rv1510_85_to_stop
0.393372637205772	E270A mutant	antisense_gmdA_119_to_stop
0.24978586563727	E270A mutant	sense_gmdA_116_to_stop
0.306632681468171	E270A mutant	antisense_gmdA_55_to_stop
0.293693644531713	E270A mutant	sense_gmdA_52_to_stop
0.293640371953442	E270A mutant	antisense_epiA_280_from_start
0.311559355521161	E270A mutant	sense_epiA_283_from_start
0.242165946795147	E270A mutant	sense_Rv1515c_394_to_stop
0.287559113480631	E270A mutant	antisense_Rv1515c_397_to_stop
0.347054070285059	E270A mutant	sense_Rv1515c_442_from_start
0.32000648155271	E270A mutant	antisense_Rv1515c_439_from_start
0.330279878062069	E270A mutant	91_up_of_fadD25
0.41663059628857	E270A mutant	88_up_of_fadD25
0.343284463736668	E270A mutant	32_up_of_fadD25
0.245504723889242	E270A mutant	29_up_of_fadD25
0.294496720654695	E270A mutant	53_down_of_mmpL12
0.305182386992202	E270A mutant	50_down_of_mmpL12
0.448058562066315	E270A mutant	sense_mmpL12_1628_to_stop
0.416500803843472	E270A mutant	antisense_mmpL12_1631_to_stop
0.312023650556822	E270A mutant	antisense_Rv1524_64_from_start
0.27653619056431	E270A mutant	sense_Rv1524_67_from_start
0.2768023529889	E270A mutant	sense_pks5_1085_from_start
0.246240254901392	E270A mutant	antisense_pks5_1082_from_start
0.333113609339538	E270A mutant	antisense_Rv1533_139_from_start
0.212437103247904	E270A mutant	sense_Rv1533_142_from_start
0.323756815837217	E270A mutant	antisense_ileS_1507_from_start
0.363967565516917	E270A mutant	sense_ileS_1510_from_start
0.297905771602382	E270A mutant	sense_ansA_265_to_stop
0.360086685295716	E270A mutant	antisense_ansA_268_to_stop
0.365896609053828	E270A mutant	sense_ansA_62_from_start
0.356070330985079	E270A mutant	antisense_ansA_59_from_start
0.285034238961394	E270A mutant	antisense_dnaE1_1315_to_stop
0.388267614494473	E270A mutant	sense_dnaE1_1312_to_stop
0.308080134972123	E270A mutant	antisense_dnaE1_359_to_stop
0.310754967843761	E270A mutant	sense_dnaE1_356_to_stop
0.293048754164413	E270A mutant	antisense_frdA_787_from_start
0.443931348550371	E270A mutant	sense_frdA_790_from_start
0.306521293982645	E270A mutant	antisense_Rv1556_152_to_stop
0.346875854741825	E270A mutant	sense_Rv1556_149_to_stop
0.360142052267702	E270A mutant	sense_Rv1566c_262_to_stop
0.332726724593184	E270A mutant	antisense_Rv1566c_265_to_stop
0.461312476228578	E270A mutant	antisense_bioB_256_to_stop
0.337878346290803	E270A mutant	sense_bioB_253_to_stop
0.277966505822147	E270A mutant	antisense_Rv1590_112_from_start
0.301189453739837	E270A mutant	sense_Rv1590_115_from_start
0.398534747603535	E270A mutant	sense_Rv1592c_484_to_stop
0.309517520503439	E270A mutant	antisense_Rv1592c_487_to_stop
0.312862689955089	E270A mutant	antisense_nadB_433_from_start
0.389553183262642	E270A mutant	sense_nadB_436_from_start
0.241594431936481	E270A mutant	antisense_hisC1_154_to_stop
0.236623196598762	E270A mutant	sense_hisC1_151_to_stop
0.52596431167141	E270A mutant	antisense_hisF_220_from_start
0.285395696723594	E270A mutant	sense_hisF_223_from_start
0.253876027228578	E270A mutant	sense_bcpB_68_to_stop
0.224829384791613	E270A mutant	antisense_bcpB_71_to_stop
0.350066189041026	E270A mutant	antisense_trpE_160_from_start
0.483622622071751	E270A mutant	sense_trpE_163_from_start
0.457404266216236	E270A mutant	antisense_pykA_655_from_start
0.303363260742996	E270A mutant	sense_pykA_658_from_start
0.410996220213991	E270A mutant	antisense_Rv1619_454_to_stop
0.332216462512154	E270A mutant	sense_Rv1619_451_to_stop
0.293525695249368	E270A mutant	antisense_Rv1619_31_to_stop
0.353495973256768	E270A mutant	sense_Rv1619_28_to_stop
0.244317591645994	E270A mutant	sense_cydD_628_to_stop
0.418357586387562	E270A mutant	antisense_cydD_631_to_stop
0.481290402281496	E270A mutant	sense_cydA_240_from_start
0.410234578903987	E270A mutant	antisense_cydA_237_from_start
0.371322888681518	E270A mutant	sense_cya_454_to_stop
0.372113605092992	E270A mutant	antisense_cya_457_to_stop
0.378909688800925	E270A mutant	sense_cya_490_from_start
0.368851435837476	E270A mutant	antisense_cya_487_from_start
0.344566133852814	E270A mutant	sense_Rv1627c_249_from_start
0.586071188884018	E270A mutant	antisense_Rv1627c_246_from_start
0.466945169613111	E270A mutant	antisense_polA_49_to_stop
0.298437839631216	E270A mutant	sense_polA_46_to_stop
0.269478830657536	E270A mutant	antisense_rpsA_571_from_start
0.356160822486257	E270A mutant	sense_rpsA_574_from_start
0.227227419297104	E270A mutant	antisense_rpsA_388_to_stop
0.357274017512977	E270A mutant	sense_rpsA_385_to_stop
0.428776152442835	E270A mutant	antisense_uvrB_694_to_stop
0.311398186401983	E270A mutant	sense_uvrB_691_to_stop
0.249267972568645	E270A mutant	sense_lysX_709_to_stop
0.511465120569552	E270A mutant	antisense_lysX_712_to_stop
0.403820925228183	E270A mutant	sense_Rv1645c_490_to_stop
0.527341571789351	E270A mutant	antisense_Rv1645c_493_to_stop
0.412942581679905	E270A mutant	antisense_PE17_366_from_start
0.306501814557229	E270A mutant	sense_PE17_369_from_start
0.349436499241702	E270A mutant	antisense_pheT_835_to_stop
0.327986470101266	E270A mutant	sense_pheT_832_to_stop
0.396393954919288	E270A mutant	antisense_pheT_184_to_stop
0.529574387625969	E270A mutant	sense_pheT_181_to_stop
0.362243302055119	E270A mutant	antisense_argF_13_to_stop
0.208013208734904	E270A mutant	sense_argF_10_to_stop
0.454872842154825	E270A mutant	antisense_argG_322_to_stop
0.41688847060191	E270A mutant	sense_argG_319_to_stop
0.502353739481244	E270A mutant	antisense_argG_226_to_stop
0.31900195193889	E270A mutant	sense_argG_223_to_stop
0.384221352062214	E270A mutant	antisense_argH_274_from_start
0.29930986622235	E270A mutant	sense_argH_277_from_start
0.32041318017411	E270A mutant	antisense_argH_623_to_stop
0.411641748853099	E270A mutant	sense_argH_620_to_stop
0.41494807605415	E270A mutant	antisense_argH_394_to_stop
0.397352417758303	E270A mutant	sense_argH_391_to_stop
0.337136774241675	E270A mutant	antisense_pks10_166_from_start
0.385490957876067	E270A mutant	sense_pks10_169_from_start
0.323708157954955	E270A mutant	sense_Rv1672c_272_to_stop
0.232746489321913	E270A mutant	antisense_Rv1672c_275_to_stop
0.346134647344919	E270A mutant	sense_Rv1672c_446_to_stop
0.372313071839715	E270A mutant	antisense_Rv1672c_449_to_stop
0.221416606734236	E270A mutant	sense_cmr_346_from_start
0.401171103945189	E270A mutant	antisense_cmr_343_from_start
0.264611500024276	E270A mutant	sense_cmr_276_from_start
0.424317898869084	E270A mutant	antisense_cmr_273_from_start
0.379970283852132	E270A mutant	antisense_moeX_229_to_stop
0.286743918691694	E270A mutant	sense_moeX_226_to_stop
0.309171171086927	E270A mutant	antisense_Rv1682_448_from_start
0.397290212722312	E270A mutant	sense_Rv1682_451_from_start
0.440383979923297	E270A mutant	antisense_Rv1683_604_to_stop
0.449092469975534	E270A mutant	sense_Rv1683_601_to_stop
0.272005472917467	E270A mutant	antisense_Rv1683_261_to_stop
0.225833715826094	E270A mutant	sense_Rv1683_258_to_stop
0.205786449561396	E270A mutant	sense_Rv1686c_169_to_stop
0.333961423315743	E270A mutant	antisense_Rv1686c_172_to_stop
0.270533289268481	E270A mutant	sense_Rv1686c_190_from_start
0.356383157701702	E270A mutant	antisense_Rv1686c_187_from_start
0.442898943022521	E270A mutant	sense_Rv1687c_55_to_stop
0.310928188679637	E270A mutant	antisense_Rv1687c_58_to_stop
0.325147402796748	E270A mutant	antisense_tyrS_316_from_start
0.30895548164492	E270A mutant	sense_tyrS_319_from_start
0.463414040271238	E270A mutant	antisense_Rv1691_220_to_stop
0.481970902940623	E270A mutant	sense_Rv1691_217_to_stop
0.390390652069453	E270A mutant	antisense_Rv1693_22_to_stop
0.369228896416089	E270A mutant	sense_Rv1693_19_to_stop
0.413154810157084	E270A mutant	antisense_tlyA_220_from_start
0.332822751994142	E270A mutant	sense_tlyA_223_from_start
0.430046287763612	E270A mutant	antisense_recN_358_to_stop
0.392372781120982	E270A mutant	sense_recN_355_to_stop
0.292146425285607	E270A mutant	antisense_Rv1697_403_to_stop
0.327927638404193	E270A mutant	sense_Rv1697_400_to_stop
0.520632439204085	E270A mutant	antisense_pyrG_496_from_start
0.36064227741376	E270A mutant	sense_pyrG_499_from_start
0.357940652047687	E270A mutant	antisense_Rv1701_136_to_stop
0.35880106249485	E270A mutant	sense_Rv1701_133_to_stop
0.379041613227789	E270A mutant	sense_Rv1703c_118_from_start
0.411121147499059	E270A mutant	antisense_Rv1703c_115_from_start
0.451089259300528	E270A mutant	sense_cycA_475_from_start
0.568276885337699	E270A mutant	antisense_cycA_472_from_start
0.324140071089302	E270A mutant	antisense_Rv1707_184_to_stop
0.402349329888758	E270A mutant	sense_Rv1707_181_to_stop
0.511139101234952	E270A mutant	antisense_scpA_325_from_start
0.42724240441479	E270A mutant	sense_scpA_328_from_start
0.570353093168236	E270A mutant	antisense_scpA_403_from_start
0.397376230595053	E270A mutant	sense_scpA_406_from_start
0.386724942328289	E270A mutant	antisense_scpA_61_to_stop
0.340337632037505	E270A mutant	sense_scpA_58_to_stop
0.312942509202498	E270A mutant	antisense_scpB_343_from_start
0.258760131069954	E270A mutant	sense_scpB_346_from_start
0.456944108262814	E270A mutant	antisense_scpB_175_to_stop
0.31176714116067	E270A mutant	sense_scpB_172_to_stop
0.450062978954765	E270A mutant	antisense_Rv1719_166_from_start
0.518902914559248	E270A mutant	sense_Rv1719_169_from_start
0.407841480549657	E270A mutant	sense_Rv1724c_28_from_start
0.347413055303252	E270A mutant	antisense_Rv1724c_25_from_start
0.527562894904183	E270A mutant	15_up_of_Rv1726
0.350303524004312	E270A mutant	12_up_of_Rv1726
0.232766395558009	E270A mutant	sense_Rv1739c_456_from_start
0.232279997613876	E270A mutant	antisense_Rv1739c_453_from_start
0.335382828030084	E270A mutant	antisense_pknE_153_from_start
0.298876543192499	E270A mutant	sense_pknE_156_from_start
0.371540156841693	E270A mutant	sense_idi_132_from_start
0.392202933510926	E270A mutant	antisense_idi_129_from_start
0.388754079861215	E270A mutant	antisense_Rv1747_934_from_start
0.260743921677754	E270A mutant	sense_Rv1747_937_from_start
0.321985531604249	E270A mutant	antisense_Rv1747_388_to_stop
0.274618645399452	E270A mutant	sense_Rv1747_385_to_stop
0.256148066350635	E270A mutant	sense_fadD1_447_to_stop
0.22427418583533	E270A mutant	antisense_fadD1_450_to_stop
0.314845837842561	E270A mutant	antisense_erg3_378_from_start
0.252144826061617	E270A mutant	sense_erg3_381_from_start
0.457542210149322	E270A mutant	antisense_Rv1816_100_to_stop
0.290414652722438	E270A mutant	sense_Rv1816_97_to_stop
0.465967733259286	E270A mutant	antisense_Rv1817_460_from_start
0.303009918568234	E270A mutant	sense_Rv1817_463_from_start
0.306373332165414	E270A mutant	antisense_Rv1817_448_to_stop
0.37702288566212	E270A mutant	sense_Rv1817_445_to_stop
0.364897386530787	E270A mutant	sense_bacA_163_to_stop
0.404271691418891	E270A mutant	antisense_bacA_166_to_stop
0.33234796476442	E270A mutant	sense_bacA_459_from_start
0.338949240841465	E270A mutant	antisense_bacA_456_from_start
0.404719520676352	E270A mutant	antisense_ilvG_517_to_stop
0.380371637363918	E270A mutant	sense_ilvG_514_to_stop
0.408352301458177	E270A mutant	antisense_secA2_817_from_start
0.278695683709217	E270A mutant	sense_secA2_820_from_start
0.324915588965451	E270A mutant	antisense_Rv1823_106_to_stop
0.328784254518545	E270A mutant	sense_Rv1823_103_to_stop
0.330899364866894	E270A mutant	antisense_Rv1824_18_from_start
0.354827780826458	E270A mutant	sense_Rv1824_21_from_start
0.356127400750852	E270A mutant	antisense_Rv1825_297_to_stop
0.374443575658161	E270A mutant	sense_Rv1825_294_to_stop
0.427994814497014	E270A mutant	antisense_gcvH_61_to_stop
0.278341826741301	E270A mutant	sense_gcvH_58_to_stop
0.38922386379869	E270A mutant	antisense_Rv1829_133_from_start
0.40477897132468	E270A mutant	sense_Rv1829_136_from_start
0.320715857844099	E270A mutant	antisense_lipZ_244_from_start
0.401054729554502	E270A mutant	sense_lipZ_247_from_start
0.431793010984599	E270A mutant	sense_Rv1835c_418_to_stop
0.332712254202322	E270A mutant	antisense_Rv1835c_421_to_stop
0.355429428467232	E270A mutant	sense_Rv1835c_259_from_start
0.391082700574345	E270A mutant	antisense_Rv1835c_256_from_start
0.397612824590988	E270A mutant	sense_Rv1836c_52_to_stop
0.292821001636532	E270A mutant	antisense_Rv1836c_55_to_stop
0.352211283690668	E270A mutant	sense_glcB_305_to_stop
0.257934377871711	E270A mutant	antisense_glcB_308_to_stop
0.38338142809336	E270A mutant	sense_vapC13_82_from_start
0.53037815004068	E270A mutant	antisense_vapC13_79_from_start
0.409374984810143	E270A mutant	sense_Rv1841c_52_to_stop
0.3846682178422	E270A mutant	antisense_Rv1841c_55_to_stop
0.511521011324508	E270A mutant	sense_Rv1842c_370_to_stop
0.539647691394527	E270A mutant	antisense_Rv1842c_373_to_stop
0.343620017382436	E270A mutant	sense_guaB1_523_from_start
0.444969753962182	E270A mutant	antisense_guaB1_520_from_start
0.306581860297843	E270A mutant	sense_guaB1_485_from_start
0.239984944410113	E270A mutant	antisense_guaB1_482_from_start
0.382246315393966	E270A mutant	sense_blaR_352_to_stop
0.513992692015871	E270A mutant	antisense_blaR_355_to_stop
0.338144696584906	E270A mutant	antisense_ureC_562_from_start
0.241629405761987	E270A mutant	sense_ureC_565_from_start
0.313134768445633	E270A mutant	antisense_ureD_265_from_start
0.277177759979743	E270A mutant	sense_ureD_268_from_start
0.346785700665887	E270A mutant	sense_Rv1855c_181_from_start
0.347874686523844	E270A mutant	antisense_Rv1855c_178_from_start
0.402733168347266	E270A mutant	antisense_modB_358_from_start
0.459688577245277	E270A mutant	sense_modB_361_from_start
0.378608278821608	E270A mutant	antisense_modB_130_to_stop
0.335252392009682	E270A mutant	sense_modB_127_to_stop
0.453521964679954	E270A mutant	13_up_of_Rv1866
0.318183859005671	E270A mutant	10_up_of_Rv1866
0.353917938339306	E270A mutant	antisense_Rv1867_394_from_start
0.243657352708637	E270A mutant	sense_Rv1867_397_from_start
0.406184740662377	E270A mutant	antisense_Rv1868_863_from_start
0.359333236090741	E270A mutant	sense_Rv1868_866_from_start
0.450186695074536	E270A mutant	sense_lldD2_52_from_start
0.333627788078998	E270A mutant	antisense_lldD2_49_from_start
0.288249198330534	E270A mutant	antisense_glnA3_564_to_stop
0.291756454090119	E270A mutant	sense_glnA3_561_to_stop
0.336204265259518	E270A mutant	antisense_Rv1879_217_to_stop
0.37889716224521	E270A mutant	sense_Rv1879_214_to_stop
0.238445970969719	E270A mutant	sense_cyp140_283_from_start
0.275024198223964	E270A mutant	antisense_cyp140_280_from_start
0.27926140672157	E270A mutant	sense_Rv1885c_143_to_stop
0.272343311434097	E270A mutant	antisense_Rv1885c_146_to_stop
0.253308668222791	E270A mutant	sense_Rv1888c_299_to_stop
0.241061541966915	E270A mutant	antisense_Rv1888c_302_to_stop
0.356558654588019	E270A mutant	54_down_of_Rv1888A
0.384192334999558	E270A mutant	51_down_of_Rv1888A
0.419426724596971	E270A mutant	antisense_Rv1891_138_from_start
0.455832815901141	E270A mutant	sense_Rv1891_141_from_start
0.302603743805753	E270A mutant	sense_Rv1894c_142_from_start
0.394205726841804	E270A mutant	antisense_Rv1894c_139_from_start
0.323184602967293	E270A mutant	sense_Rv1896c_184_from_start
0.289674598972715	E270A mutant	antisense_Rv1896c_181_from_start
0.469042496150763	E270A mutant	antisense_cinA_100_from_start
0.51923556135254	E270A mutant	sense_cinA_103_from_start
0.4377225147408	E270A mutant	antisense_cinA_298_from_start
0.522639016504895	E270A mutant	sense_cinA_301_from_start
0.444016123849238	E270A mutant	sense_Rv1906c_21_to_stop
0.391144957971941	E270A mutant	antisense_Rv1906c_24_to_stop
0.512587897961048	E270A mutant	sense_katG_460_to_stop
0.341328654796907	E270A mutant	antisense_katG_463_to_stop
0.404244370735325	E270A mutant	sense_katG_880_from_start
0.306624575884894	E270A mutant	antisense_katG_877_from_start
0.278483067054589	E270A mutant	sense_katG_649_from_start
0.279394574273087	E270A mutant	antisense_katG_646_from_start
0.241379240328998	E270A mutant	sense_Rv1910c_185_to_stop
0.338603312641349	E270A mutant	antisense_Rv1910c_188_to_stop
0.274695661141777	E270A mutant	sense_lppC_94_to_stop
0.338699970384115	E270A mutant	antisense_lppC_97_to_stop
0.270017366937481	E270A mutant	antisense_aceAa_342_from_start
0.299137746382818	E270A mutant	sense_aceAa_345_from_start
0.29741918571404	E270A mutant	sense_Rv1919c_125_to_stop
0.278036033769521	E270A mutant	antisense_Rv1919c_128_to_stop
0.352226303583351	E270A mutant	antisense_lipD_250_to_stop
0.478698335971901	E270A mutant	sense_lipD_247_to_stop
0.26554876743519	E270A mutant	91_up_of_mpt63
0.356112048481332	E270A mutant	94_up_of_mpt63
0.167172721341071	E270A mutant	sense_Rv1931c_309_from_start
0.352561842502624	E270A mutant	antisense_Rv1931c_306_from_start
0.222960991700264	E270A mutant	sense_fadE18_211_to_stop
0.363558621570961	E270A mutant	antisense_fadE18_214_to_stop
0.215478018714292	E270A mutant	sense_fadE17_260_to_stop
0.242266009126806	E270A mutant	antisense_fadE17_263_to_stop
0.412840355689185	E270A mutant	sense_echA13_52_to_stop
0.363960480891372	E270A mutant	antisense_echA13_55_to_stop
0.28418297386394	E270A mutant	antisense_Rv1936_400_from_start
0.275894182356443	E270A mutant	sense_Rv1936_403_from_start
0.362233915513672	E270A mutant	antisense_Rv1937_793_from_start
0.504807661228554	E270A mutant	sense_Rv1937_796_from_start
0.326174200871795	E270A mutant	antisense_Rv1937_1168_from_start
0.387882509598471	E270A mutant	sense_Rv1937_1171_from_start
0.371530169638893	E270A mutant	antisense_Rv1937_1255_to_stop
0.429693127595161	E270A mutant	sense_Rv1937_1252_to_stop
0.344661927624419	E270A mutant	antisense_Rv1937_583_to_stop
0.355612562809736	E270A mutant	sense_Rv1937_580_to_stop
0.351412793973689	E270A mutant	antisense_Rv1937_217_to_stop
0.315216010919077	E270A mutant	sense_Rv1937_214_to_stop
0.252112950451888	E270A mutant	antisense_ephB_460_from_start
0.378597878155202	E270A mutant	sense_ephB_463_from_start
0.297477412905077	E270A mutant	antisense_ephB_436_to_stop
0.375328521587457	E270A mutant	sense_ephB_433_to_stop
0.28440854979631	E270A mutant	antisense_Rv1939_191_to_stop
0.2314154277923	E270A mutant	sense_Rv1939_188_to_stop
0.295559901349668	E270A mutant	antisense_Rv1939_85_to_stop
0.344695705308063	E270A mutant	sense_Rv1939_82_to_stop
0.304109588285751	E270A mutant	sense_mazE5_9_to_stop
0.374748052104683	E270A mutant	antisense_mazE5_12_to_stop
0.363242062356013	E270A mutant	antisense_Rv1945_272_to_stop
0.217734306234733	E270A mutant	sense_Rv1945_269_to_stop
0.30890626159275	E270A mutant	antisense_Rv1947_166_from_start
0.339476523950465	E270A mutant	sense_Rv1947_169_from_start
0.384910472631776	E270A mutant	antisense_higB_184_to_stop
0.401435896746617	E270A mutant	sense_higB_181_to_stop
0.287424887710625	E270A mutant	sense_mce3R_382_to_stop
0.264532097126202	E270A mutant	antisense_mce3R_385_to_stop
0.252994704542915	E270A mutant	sense_mce3R_433_from_start
0.359433377325805	E270A mutant	antisense_mce3R_430_from_start
0.40981037940136	E270A mutant	antisense_mce3A_262_from_start
0.341143758701161	E270A mutant	sense_mce3A_265_from_start
0.4500626668909	E270A mutant	antisense_mce3A_577_from_start
0.300668230819829	E270A mutant	sense_mce3A_580_from_start
0.354532689557511	E270A mutant	antisense_mce3B_331_from_start
0.481291136473986	E270A mutant	sense_mce3B_334_from_start
0.405450830453667	E270A mutant	120_up_of_Rv1976c
0.50553103586769	E270A mutant	123_up_of_Rv1976c
0.369963451169111	E270A mutant	antisense_Rv1978_97_from_start
0.336386341319333	E270A mutant	sense_Rv1978_100_from_start
0.326674663830358	E270A mutant	sense_Rv1979c_107_from_start
0.313148182594702	E270A mutant	antisense_Rv1979c_104_from_start
0.278134013367947	E270A mutant	sense_nrdF1_481_from_start
0.283457391263151	E270A mutant	antisense_nrdF1_478_from_start
0.318023196775834	E270A mutant	antisense_PE_PGRS35_814_from_start
0.259748754181627	E270A mutant	sense_PE_PGRS35_817_from_start
0.268583961832003	E270A mutant	sense_cfp21_194_to_stop
0.257942698774689	E270A mutant	antisense_cfp21_197_to_stop
0.324955579326956	E270A mutant	sense_ctpG_1001_to_stop
0.258192558830201	E270A mutant	antisense_ctpG_1004_to_stop
0.34031290467859	E270A mutant	sense_ctpG_597_from_start
0.250160566069593	E270A mutant	antisense_ctpG_594_from_start
0.55434287193074	E270A mutant	sense_ctpG_333_from_start
0.465163702924469	E270A mutant	antisense_ctpG_330_from_start
0.283014067674865	E270A mutant	antisense_Rv1995_299_from_start
0.340695114710591	E270A mutant	sense_Rv1995_302_from_start
0.266611300303533	E270A mutant	antisense_Rv1996_354_from_start
0.368673166437919	E270A mutant	sense_Rv1996_357_from_start
0.290674419216627	E270A mutant	sense_Rv2004c_742_from_start
0.251180466925589	E270A mutant	antisense_Rv2004c_739_from_start
0.30250124221394	E270A mutant	sense_Rv2008c_646_to_stop
0.214787571548332	E270A mutant	antisense_Rv2008c_649_to_stop
0.344021117128276	E270A mutant	sense_Rv2011c_127_to_stop
0.347737435061335	E270A mutant	antisense_Rv2011c_130_to_stop
0.281435793814938	E270A mutant	antisense_Rv2014_40_to_stop
0.30162529945718	E270A mutant	sense_Rv2014_37_to_stop
0.319742352346193	E270A mutant	sense_dosT_433_to_stop
0.28972052129272	E270A mutant	antisense_dosT_436_to_stop
0.383080826321677	E270A mutant	sense_pncA_43_to_stop
0.381734251696196	E270A mutant	antisense_pncA_46_to_stop
0.392329756041562	E270A mutant	sense_lipT_10_from_start
0.487281281232112	E270A mutant	antisense_lipT_7_from_start
0.379980514721765	E270A mutant	sense_Rv2047c_1177_to_stop
0.400104350437973	E270A mutant	antisense_Rv2047c_1180_to_stop
0.403947970331963	E270A mutant	sense_pks12_2248_to_stop
0.423214266283983	E270A mutant	antisense_pks12_2251_to_stop
0.432299431888377	E270A mutant	sense_pks12_6001_to_stop
0.384238840421448	E270A mutant	antisense_pks12_6004_to_stop
0.454888694450209	E270A mutant	sense_pks12_2188_from_start
0.426846193259044	E270A mutant	antisense_pks12_2185_from_start
0.412636927047067	E270A mutant	sense_pks12_537_from_start
0.339594738933443	E270A mutant	antisense_pks12_534_from_start
0.336190184080627	E270A mutant	sense_pks12_388_from_start
0.466304449202948	E270A mutant	antisense_pks12_385_from_start
0.335344849489826	E270A mutant	sense_pks12_91_from_start
0.279786573145211	E270A mutant	antisense_pks12_88_from_start
0.523649926940482	E270A mutant	sense_pks12_16_from_start
0.356687292233518	E270A mutant	antisense_pks12_13_from_start
0.377765555532918	E270A mutant	antisense_Rv2050_79_to_stop
0.419075692640463	E270A mutant	sense_Rv2050_76_to_stop
0.471110883366838	E270A mutant	antisense_Rv2059_110_to_stop
0.305742936896552	E270A mutant	sense_Rv2059_107_to_stop
0.430233822513201	E270A mutant	sense_cobN_430_from_start
0.325722761587721	E270A mutant	antisense_cobN_427_from_start
0.277562094000975	E270A mutant	sense_Rv2067c_361_to_stop
0.254842329054629	E270A mutant	antisense_Rv2067c_364_to_stop
0.375253890612215	E270A mutant	sense_Rv2067c_319_from_start
0.240754950633351	E270A mutant	antisense_Rv2067c_316_from_start
0.530527964055421	E270A mutant	sense_blaC_154_from_start
0.424926267472561	E270A mutant	antisense_blaC_151_from_start
0.435586477603579	E270A mutant	antisense_sigC_213_from_start
0.384718195043923	E270A mutant	sense_sigC_216_from_start
0.293224856539641	E270A mutant	antisense_Rv2074_163_to_stop
0.348533554385727	E270A mutant	sense_Rv2074_160_to_stop
0.478877572920039	E270A mutant	sense_Rv2075c_563_to_stop
0.402859160690303	E270A mutant	antisense_Rv2075c_566_to_stop
0.466712331381927	E270A mutant	sense_Rv2075c_664_from_start
0.343565526490179	E270A mutant	antisense_Rv2075c_661_from_start
0.370349397397616	E270A mutant	sense_Rv2076c_86_to_stop
0.319064525541442	E270A mutant	antisense_Rv2076c_89_to_stop
0.240255871365362	E270A mutant	antisense_pknJ_659_from_start
0.243816868181595	E270A mutant	sense_pknJ_662_from_start
0.313862027002493	E270A mutant	sense_pepE_211_from_start
0.28578153774171	E270A mutant	antisense_pepE_208_from_start
0.549575165835614	E270A mutant	sense_pafC_205_to_stop
0.391884356409821	E270A mutant	antisense_pafC_208_to_stop
0.397881480451286	E270A mutant	antisense_helZ_877_from_start
0.265645267544373	E270A mutant	sense_helZ_880_from_start
0.507407941154291	E270A mutant	antisense_helZ_1396_from_start
0.374862895874021	E270A mutant	sense_helZ_1399_from_start
0.380082499251571	E270A mutant	antisense_Rv2102_4_from_start
0.381731579985146	E270A mutant	sense_Rv2102_7_from_start
0.423385364343189	E270A mutant	226_up_of_vapB37
0.479225796643329	E270A mutant	229_up_of_vapB37
0.357982748452734	E270A mutant	sense_dop_97_to_stop
0.298384505557631	E270A mutant	antisense_dop_100_to_stop
0.418189018410278	E270A mutant	sense_metH_109_to_stop
0.317385009677759	E270A mutant	antisense_metH_112_to_stop
0.400330087044279	E270A mutant	sense_metH_139_to_stop
0.301141012680431	E270A mutant	antisense_metH_142_to_stop
0.40107621606511	E270A mutant	sense_metH_331_to_stop
0.403755654680619	E270A mutant	antisense_metH_334_to_stop
0.360944643795817	E270A mutant	sense_metH_136_from_start
0.305369277453665	E270A mutant	antisense_metH_133_from_start
0.501514636258698	E270A mutant	antisense_ansP1_478_from_start
0.40611564375766	E270A mutant	sense_ansP1_481_from_start
0.330973220302579	E270A mutant	sense_mshC_254_to_stop
0.32885867664395	E270A mutant	antisense_mshC_257_to_stop
0.279464297451094	E270A mutant	27_up_of_mshC
0.32210551569229	E270A mutant	27_down_of_cysQ
0.475153645829324	E270A mutant	sense_cysQ_94_from_start
0.521519791311256	E270A mutant	antisense_cysQ_91_from_start
0.401412105346776	E270A mutant	sense_Rv2134c_127_from_start
0.377363648882632	E270A mutant	antisense_Rv2134c_124_from_start
0.540189289444703	E270A mutant	sense_Rv2135c_214_from_start
0.414867339636359	E270A mutant	antisense_Rv2135c_211_from_start
0.323238920043232	E270A mutant	sense_Rv2137c_88_from_start
0.417961620665394	E270A mutant	antisense_Rv2137c_85_from_start
0.443403249982002	E270A mutant	sense_wag31_88_to_stop
0.415506801464499	E270A mutant	antisense_wag31_91_to_stop
0.263624213936498	E270A mutant	sense_yfiH_313_to_stop
0.345461808603493	E270A mutant	antisense_yfiH_316_to_stop
0.505159851732857	E270A mutant	sense_murG_415_to_stop
0.466061027928175	E270A mutant	antisense_murG_418_to_stop
0.618472883719259	E270A mutant	sense_murG_268_from_start
0.308216624021651	E270A mutant	antisense_murG_265_from_start
0.232399669690444	E270A mutant	sense_murF_211_to_stop
0.43460496179229	E270A mutant	antisense_murF_214_to_stop
0.314891768359644	E270A mutant	sense_murF_565_to_stop
0.350699137381342	E270A mutant	antisense_murF_568_to_stop
0.373052913436288	E270A mutant	sense_PE_PGRS38_21_to_stop
0.409007026402739	E270A mutant	antisense_PE_PGRS38_24_to_stop
0.337254503994894	E270A mutant	sense_Rv2184c_475_from_start
0.398526615077045	E270A mutant	antisense_Rv2184c_472_from_start
0.360016053303406	E270A mutant	antisense_fadD15_875_to_stop
0.288311570856554	E270A mutant	sense_fadD15_872_to_stop
0.244563374710527	E270A mutant	sense_pimB_329_from_start
0.327883399255164	E270A mutant	antisense_pimB_326_from_start
0.359783954023093	E270A mutant	sense_Rv2190c_203_to_stop
0.334773146199032	E270A mutant	antisense_Rv2190c_206_to_stop
0.388020370480128	E270A mutant	sense_Rv2190c_467_from_start
0.3194049904258	E270A mutant	antisense_Rv2190c_464_from_start
0.351399661977843	E270A mutant	159_up_of_Rv2190c
0.349935635195575	E270A mutant	162_up_of_Rv2190c
0.260968339934558	E270A mutant	antisense_Rv2191_919_from_start
0.311517793443142	E270A mutant	sense_Rv2191_922_from_start
0.310374066835368	E270A mutant	sense_trpD_240_to_stop
0.315999815492441	E270A mutant	antisense_trpD_243_to_stop
0.39857807314667	E270A mutant	sense_trpD_454_from_start
0.39742959487065	E270A mutant	antisense_trpD_451_from_start
0.431305913378921	E270A mutant	antisense_qcrB_586_to_stop
0.424941060343538	E270A mutant	sense_qcrB_583_to_stop
0.358600611475856	E270A mutant	sense_mmpS3_98_to_stop
0.198122797598686	E270A mutant	antisense_mmpS3_101_to_stop
0.448098584716402	E270A mutant	antisense_asnB_415_to_stop
0.456255507408003	E270A mutant	sense_asnB_412_to_stop
0.386485592182713	E270A mutant	antisense_asnB_304_to_stop
0.515747086910166	E270A mutant	sense_asnB_301_to_stop
0.307362578386908	E270A mutant	antisense_asnB_214_to_stop
0.238428659431833	E270A mutant	sense_asnB_211_to_stop
0.381507444719721	E270A mutant	sense_adoK_109_to_stop
0.312814212872573	E270A mutant	antisense_adoK_112_to_stop
0.335057769077039	E270A mutant	sense_adoK_154_to_stop
0.367874576612828	E270A mutant	antisense_adoK_157_to_stop
0.427062305744131	E270A mutant	antisense_Rv2203_322_to_stop
0.430082718415761	E270A mutant	sense_Rv2203_319_to_stop
0.46678790361604	E270A mutant	10_up_of_Rv2205c
0.446533293345047	E270A mutant	13_up_of_Rv2205c
0.295668704509611	E270A mutant	antisense_Rv2209_381_from_start
0.31766207642917	E270A mutant	sense_Rv2209_384_from_start
0.296856888580969	E270A mutant	antisense_Rv2209_408_from_start
0.446973889216435	E270A mutant	sense_Rv2209_411_from_start
0.454517573439813	E270A mutant	antisense_Rv2216_307_to_stop
0.507813489812136	E270A mutant	sense_Rv2216_304_to_stop
0.311561285490427	E270A mutant	antisense_Rv2216_76_to_stop
0.397287080060568	E270A mutant	sense_Rv2216_73_to_stop
0.483306281082228	E270A mutant	antisense_lipA_37_from_start
0.459420148007902	E270A mutant	sense_lipA_40_from_start
0.427463666459603	E270A mutant	antisense_glnA1_301_from_start
0.4988016901654	E270A mutant	sense_glnA1_304_from_start
0.543857923113973	E270A mutant	antisense_glnA1_637_from_start
0.530771157739297	E270A mutant	sense_glnA1_640_from_start
0.480463142339055	E270A mutant	antisense_glnA1_343_to_stop
0.439303379854668	E270A mutant	sense_glnA1_340_to_stop
0.478825065744738	E270A mutant	sense_glnE_667_to_stop
0.429047735151554	E270A mutant	antisense_glnE_670_to_stop
0.541086411606245	E270A mutant	sense_glnA2_502_to_stop
0.45882443063513	E270A mutant	antisense_glnA2_505_to_stop
0.375915114678997	E270A mutant	249_up_of_panB
0.309121818396767	E270A mutant	246_up_of_panB
0.258666334326916	E270A mutant	antisense_Rv2226_34_from_start
0.345375200296717	E270A mutant	sense_Rv2226_37_from_start
0.218810683824628	E270A mutant	antisense_Rv2227_78_to_stop
0.270313096004573	E270A mutant	sense_Rv2227_75_to_stop
0.258239421852814	E270A mutant	sense_Rv2229c_355_from_start
0.348020879512473	E270A mutant	antisense_Rv2229c_352_from_start
0.223624604010759	E270A mutant	sense_Rv2230c_355_to_stop
0.295766889662608	E270A mutant	antisense_Rv2230c_358_to_stop
0.409415647730817	E270A mutant	sense_Rv2230c_507_from_start
0.358056772607311	E270A mutant	antisense_Rv2230c_504_from_start
0.368101846134719	E270A mutant	sense_cobD_427_from_start
0.302852639379284	E270A mutant	antisense_cobD_424_from_start
0.420695094956359	E270A mutant	sense_cobD_127_from_start
0.416444047819788	E270A mutant	antisense_cobD_124_from_start
0.345953383395948	E270A mutant	antisense_Rv2237_157_to_stop
0.269601267583332	E270A mutant	sense_Rv2237_154_to_stop
0.445464411910153	E270A mutant	sense_Rv2239c_47_to_stop
0.427747702968635	E270A mutant	antisense_Rv2239c_50_to_stop
0.302601457450428	E270A mutant	antisense_aceE_49_from_start
0.352874431711521	E270A mutant	sense_aceE_52_from_start
0.450190702874572	E270A mutant	antisense_aceE_196_from_start
0.60733563098263	E270A mutant	sense_aceE_199_from_start
0.417318673633837	E270A mutant	antisense_aceE_835_from_start
0.39264775250272	E270A mutant	sense_aceE_838_from_start
0.306716590356773	E270A mutant	antisense_aceE_310_to_stop
0.341723785658048	E270A mutant	sense_aceE_307_to_stop
0.500294372924277	E270A mutant	antisense_Rv2242_20_from_start
0.538743393645957	E270A mutant	sense_Rv2242_23_from_start
0.329750038350557	E270A mutant	antisense_kasA_367_to_stop
0.347760328756965	E270A mutant	sense_kasA_364_to_stop
0.300525321234993	E270A mutant	sense_glpD1_200_from_start
0.252345075329692	E270A mutant	antisense_glpD1_197_from_start
0.414955967303655	E270A mutant	antisense_Rv2251_352_from_start
0.32008386892359	E270A mutant	sense_Rv2251_355_from_start
0.376329601182165	E270A mutant	sense_Rv2256c_240_to_stop
0.404581463376436	E270A mutant	antisense_Rv2256c_243_to_stop
0.28450187199182	E270A mutant	sense_Rv2360c_37_to_stop
0.317767068255816	E270A mutant	antisense_Rv2360c_40_to_stop
0.417176912212553	E270A mutant	sense_Rv2361c_137_to_stop
0.346730751793892	E270A mutant	antisense_Rv2361c_140_to_stop
0.411638803323915	E270A mutant	sense_recO_154_from_start
0.438855689741564	E270A mutant	antisense_recO_151_from_start
0.361872281859399	E270A mutant	antisense_amiA2_26_from_start
0.28370587131119	E270A mutant	sense_amiA2_29_from_start
0.32337849175845	E270A mutant	antisense_amiA2_296_from_start
0.388703337351219	E270A mutant	sense_amiA2_299_from_start
0.595973316483776	E270A mutant	sense_Rv2366c_349_to_stop
0.461855109683711	E270A mutant	antisense_Rv2366c_352_to_stop
0.251083330977664	E270A mutant	sense_phoH1_378_to_stop
0.204149064995782	E270A mutant	antisense_phoH1_381_to_stop
0.333226720295063	E270A mutant	sense_phoH1_38_from_start
0.315853414317907	E270A mutant	antisense_phoH1_35_from_start
0.451653792174642	E270A mutant	sense_Rv2372c_210_from_start
0.254355823970463	E270A mutant	antisense_Rv2372c_207_from_start
0.322799162575864	E270A mutant	sense_dnaJ2_214_from_start
0.303760687679421	E270A mutant	antisense_dnaJ2_211_from_start
0.434557538808907	E270A mutant	sense_hrcA_361_to_stop
0.340490642043209	E270A mutant	antisense_hrcA_364_to_stop
0.334795583273731	E270A mutant	sense_mbtG_32_from_start
0.295699770836347	E270A mutant	antisense_mbtG_29_from_start
0.368437546281004	E270A mutant	sense_mbtF_1837_to_stop
0.434552827476316	E270A mutant	antisense_mbtF_1840_to_stop
0.482664162234426	E270A mutant	sense_mbtE_391_to_stop
0.363629927784972	E270A mutant	antisense_mbtE_394_to_stop
0.314721782713747	E270A mutant	sense_mbtE_856_to_stop
0.381402440132405	E270A mutant	antisense_mbtE_859_to_stop
0.347602482841232	E270A mutant	sense_mbtE_259_from_start
0.428328464350867	E270A mutant	antisense_mbtE_256_from_start
0.298504507316205	E270A mutant	sense_mbtC_319_from_start
0.343044067655549	E270A mutant	antisense_mbtC_316_from_start
0.516792403229938	E270A mutant	sense_mbtB_1429_to_stop
0.505253680357688	E270A mutant	antisense_mbtB_1432_to_stop
0.374240825930425	E270A mutant	sense_mbtB_2023_to_stop
0.381004750937892	E270A mutant	antisense_mbtB_2026_to_stop
0.445269035835688	E270A mutant	antisense_mbtA_298_from_start
0.416045581162321	E270A mutant	sense_mbtA_301_from_start
0.33679284036742	E270A mutant	antisense_mbtA_192_to_stop
0.270146939348849	E270A mutant	sense_mbtA_189_to_stop
0.370232942521559	E270A mutant	sense_rpfD_27_to_stop
0.53869922135131	E270A mutant	antisense_rpfD_30_to_stop
0.377467054211723	E270A mutant	antisense_ggtB_565_from_start
0.349034659474515	E270A mutant	sense_ggtB_568_from_start
0.520949807302261	E270A mutant	antisense_PE_PGRS41_307_from_start
0.401969592417922	E270A mutant	sense_PE_PGRS41_310_from_start
0.334436929908803	E270A mutant	sense_subI_210_from_start
0.285654272721373	E270A mutant	antisense_subI_207_from_start
0.298979969439949	E270A mutant	antisense_Rv2402_691_from_start
0.34424370419921	E270A mutant	sense_Rv2402_694_from_start
0.325311740504764	E270A mutant	sense_lepA_115_to_stop
0.252386489563279	E270A mutant	antisense_lepA_118_to_stop
0.371904710474274	E270A mutant	sense_lepA_418_from_start
0.407802892376108	E270A mutant	antisense_lepA_415_from_start
0.465514225349828	E270A mutant	sense_lepA_100_from_start
0.379790658512135	E270A mutant	antisense_lepA_97_from_start
0.424791348369359	E270A mutant	sense_Rv2410c_303_from_start
0.304926544859641	E270A mutant	antisense_Rv2410c_300_from_start
0.332851744961725	E270A mutant	sense_Rv2411c_197_to_stop
0.319506991391266	E270A mutant	antisense_Rv2411c_200_to_stop
0.251292610177513	E270A mutant	sense_gpgP_14_to_stop
0.271963689211638	E270A mutant	antisense_gpgP_17_to_stop
0.462972299426635	E270A mutant	39_up_of_nadD
0.39875198031423	E270A mutant	42_up_of_nadD
0.376620553911515	E270A mutant	antisense_Rv2423_214_from_start
0.308076341955038	E270A mutant	sense_Rv2423_217_from_start
0.433483953313277	E270A mutant	sense_Rv2425c_514_from_start
0.407292210140782	E270A mutant	antisense_Rv2425c_511_from_start
0.482199220709111	E270A mutant	sense_Rv2426c_256_to_stop
[truncated: 7,661 more rows]
