# Supplementary material for: Drivers and sites of diversity in the DNA adenine methylomes of 93 Mycobacterium tuberculosis complex clinical isolates
Source: eLife. 2020 Oct 27;9:e58542. doi: 10.7554/eLife.58542 (PMC7591249; doi:10.7554/eLife.58542)
Supplement: Figure 4—source data 5. [file elife-58542-fig4-data5.csv]

sd	MTase	RefLoci	variability	position (kb)	CDS
0.318080538272545	MamA	antisense_dnaA_520_to_stop	hypervariable	1	dnaA
0.245214939600586	MamA	sense_dnaA_517_to_stop	normal	1	dnaA
0.220051230362581	MamB	antisense_recF_22_from_start	normal	3	recF
0.234003870340254	MamA	antisense_recF_506_from_start	normal	4	recF
0.224859170924952	MamA	sense_recF_509_from_start	normal	4	recF
0.22098826422366	HsdM	77_up_of_gyrB	normal	5	none
0.225437288390066	HsdM	70_up_of_gyrB	normal	5	none
0.220794069272029	HsdM	9_up_of_gyrB	normal	5	none
0.212276589703977	HsdM	2_up_of_gyrB	normal	5	none
0.237705636580326	MamA	antisense_gyrB_67_from_start	normal	5	gyrB
0.217371859461528	MamA	sense_gyrB_70_from_start	normal	5	gyrB
0.264270402740463	MamA	antisense_gyrB_256_to_stop	normal	7	gyrB
0.267648377278706	MamA	sense_gyrB_253_to_stop	normal	7	gyrB
0.255942466071932	MamB	antisense_gyrA_580_from_start	normal	8	gyrA
0.214892751334237	MamA	antisense_gyrA_613_from_start	normal	8	gyrA
0.218659070959475	MamA	sense_gyrA_616_from_start	normal	8	gyrA
0.233961408234251	HsdM	sense_gyrA_1031_to_stop	normal	9	gyrA
0.301159985392804	HsdM	antisense_gyrA_1024_to_stop	normal	9	gyrA
0.219080264071556	HsdM	sense_gyrA_314_to_stop	normal	10	gyrA
0.187223526764667	HsdM	antisense_gyrA_307_to_stop	normal	10	gyrA
0.263958880874518	MamA	antisense_Rv0007_119_from_start	normal	10	Rv0007
0.258582122082764	MamA	sense_Rv0007_122_from_start	normal	10	Rv0007
0.230147007587363	MamA	antisense_Rv0007_149_to_stop	normal	11	Rv0007
0.266563776513647	MamA	sense_Rv0007_146_to_stop	normal	11	Rv0007
0.244557888629311	MamB	antisense_pbpA_655_to_stop	normal	19	pbpA
0.208137910785158	MamB	antisense_pbpA_100_from_start	normal	20	pbpA
0.207265984363461	MamA	sense_pstP_388_to_stop	normal	22	pstP
0.205331307912259	MamA	antisense_pstP_391_to_stop	normal	22	pstP
0.261538569802653	MamA	antisense_Rv0023_217_to_stop	normal	28	Rv0023
0.260958084953588	MamA	sense_Rv0023_214_to_stop	normal	28	Rv0023
0.211868136133705	MamB	antisense_Rv0024_418_to_stop	normal	29	Rv0024
0.21065549547095	HsdM	19_up_of_Rv0029	normal	32	none
0.253290023445941	HsdM	12_up_of_Rv0029	normal	32	none
0.198721623832605	MamB	sense_Rv0030_118_from_start	normal	33	Rv0030
0.187057610226974	MamA	antisense_bioF2_625_from_start	normal	35	bioF2
0.194862215004563	MamA	sense_bioF2_628_from_start	normal	35	bioF2
0.287283042312909	MamA	antisense_fadD34_817_from_start	normal	38	fadD34
0.208214995082271	MamA	sense_fadD34_820_from_start	normal	38	fadD34
0.201738867343513	MamB	sense_Rv0039c_127_from_start	normal	42	Rv0039c
0.21775860891992	MamA	sense_mtc28_352_from_start	normal	43	mtc28
0.194003382250145	MamA	antisense_mtc28_349_from_start	normal	43	mtc28
0.296177019680833	MamA	antisense_leuS_595_to_stop	normal	46	leuS
0.273918025902378	MamA	sense_leuS_592_to_stop	normal	46	leuS
0.295368755741022	MamA	sense_Rv0042c_67_to_stop	normal	47	Rv0042c
0.249654089385586	MamA	antisense_Rv0042c_70_to_stop	normal	47	Rv0042c
0.242941193426412	MamB	2_up_of_Rv0045c	normal	50	none
0.218713380656074	MamA	sense_ino1_196_to_stop	normal	50	ino1
0.185144816098423	MamA	antisense_ino1_199_to_stop	normal	50	ino1
0.196095683423849	MamA	sense_ino1_367_to_stop	normal	50	ino1
0.246650885087611	MamA	antisense_ino1_370_to_stop	normal	50	ino1
0.245567891508935	MamA	sense_Rv0047c_7_from_start	normal	52	Rv0047c
0.252581334728574	MamA	antisense_Rv0047c_4_from_start	normal	52	Rv0047c
0.281369167952832	MamA	sense_Rv0048c_412_to_stop	normal	52	Rv0048c
0.241895225677192	MamA	antisense_Rv0048c_415_to_stop	normal	52	Rv0048c
0.22087671026965	MamB	antisense_Rv0048c_103_from_start	normal	53	Rv0048c
0.239216794249826	MamB	antisense_Rv0051_271_to_stop	normal	57	Rv0051
0.214973129748744	MamA	81_down_of_Rv0052	normal	58	none
0.250529537977672	MamA	84_down_of_Rv0052	normal	58	none
0.241329678963273	MamB	antisense_rpsR1_86_to_stop	normal	59	rpsR1
0.221213083535463	MamA	antisense_dnaB_766_from_start	normal	61	dnaB
0.249372327672617	MamA	sense_dnaB_769_from_start	normal	61	dnaB
0.277934427633667	MamA	antisense_Rv0060_523_to_stop	normal	64	Rv0060
0.268813026556629	MamA	sense_Rv0060_520_to_stop	normal	64	Rv0060
0.280078563201441	MamA	antisense_Rv0060_469_to_stop	normal	66	Rv0060
0.226943614596923	MamA	sense_Rv0060_466_to_stop	normal	66	Rv0060
0.215865241866078	HsdM	sense_Rv0064_165_from_start	normal	69	Rv0064
0.209932330699232	HsdM	antisense_Rv0064_172_from_start	normal	69	Rv0064
0.2209861893434	MamA	antisense_Rv0064_577_to_stop	normal	71	Rv0064
0.230158499185392	MamA	sense_Rv0064_574_to_stop	normal	71	Rv0064
0.238999369175269	MamA	antisense_Rv0068_421_to_stop	normal	76	Rv0068
0.219566550241145	MamA	sense_Rv0068_418_to_stop	normal	76	Rv0068
0.192537601617604	MamA	antisense_Rv0068_89_to_stop	normal	76	Rv0068
0.251617507090756	MamA	sense_Rv0068_86_to_stop	normal	76	Rv0068
0.23439448991792	MamA	sense_sdaA_417_to_stop	normal	77	sdaA
0.280476042145866	MamA	antisense_sdaA_420_to_stop	normal	77	sdaA
0.239169403889715	MamB	antisense_hycE_124_from_start	normal	96	hycE
0.253637692623635	MamB	antisense_hycE_589_to_stop	normal	96	hycE
0.466615815566677	HsdM	sense_hycE_203_to_stop	hypervariable	97	hycE
0.538961580073087	HsdM	antisense_hycE_196_to_stop	hypervariable	97	hycE
0.219825926620492	MamB	antisense_Rv0090_373_from_start	normal	99	Rv0090
0.252194430798048	MamB	antisense_ctpA_77_from_start	normal	101	ctpA
0.242361501011065	MamA	sense_Rv0093c_104_from_start	normal	104	Rv0093c
0.240685774647262	MamA	antisense_Rv0093c_101_from_start	normal	104	Rv0093c
0.222772227696533	HsdM	sense_PPE1_0_from_start	normal	105	PPE1
0.244019409082074	HsdM	antisense_PPE1_7_from_start	normal	105	PPE1
0.375919889425664	MamA	antisense_PPE1_622_from_start	hypervariable	106	PPE1
0.427997327893214	MamA	sense_PPE1_625_from_start	hypervariable	106	PPE1
0.473881653528486	MamA	antisense_fadD10_757_from_start	hypervariable	109	fadD10
0.395154635989486	MamA	sense_fadD10_760_from_start	hypervariable	109	fadD10
0.352396126625294	MamA	antisense_fadD10_394_to_stop	hypervariable	109	fadD10
0.275486161165356	MamA	sense_fadD10_391_to_stop	normal	109	fadD10
0.225351407654724	MamA	antisense_Rv0100_28_to_stop	normal	110	Rv0100
0.207320060335261	MamA	sense_Rv0100_25_to_stop	normal	110	Rv0100
0.185155909591239	MamA	antisense_nrp_178_from_start	normal	110	nrp
0.254058355014616	MamA	sense_nrp_181_from_start	normal	110	nrp
0.269979161851324	MamA	antisense_nrp_2823_from_start	normal	113	nrp
0.193884705288818	MamA	sense_nrp_2826_from_start	normal	113	nrp
0.270268939966785	MamA	antisense_nrp_1081_to_stop	normal	115	nrp
0.26855868734384	MamA	sense_nrp_1078_to_stop	normal	115	nrp
0.263589696110042	MamA	antisense_nrp_1012_to_stop	normal	117	nrp
0.279009990923521	MamA	sense_nrp_1009_to_stop	normal	117	nrp
0.233081423328153	MamA	7_up_of_Rv0102	normal	118	none
0.272277025525286	MamA	4_up_of_Rv0102	normal	118	none
0.253032230009937	MamA	antisense_Rv0102_398_from_start	normal	118	Rv0102
0.248848781710631	MamA	sense_Rv0102_401_from_start	normal	118	Rv0102
0.214410526112639	HsdM	antisense_ctpB_207_to_stop	normal	120	ctpB
0.233264497822706	HsdM	sense_ctpB_214_to_stop	normal	120	ctpB
0.261858464875092	MamB	antisense_ctpB_712_from_start	normal	120	ctpB
0.23468501916102	HsdM	antisense_ctpB_135_from_start	normal	122	ctpB
0.214976123393154	HsdM	sense_ctpB_128_from_start	normal	122	ctpB
0.200577167661196	MamA	sense_ctpB_11_from_start	normal	122	ctpB
0.243821759291936	MamA	antisense_ctpB_8_from_start	normal	122	ctpB
0.258253435620377	MamA	antisense_Rv0106_289_from_start	normal	125	Rv0106
0.271076533109407	MamA	sense_Rv0106_292_from_start	normal	125	Rv0106
0.216563634955504	MamA	antisense_Rv0106_268_to_stop	normal	125	Rv0106
0.246309725984226	MamA	sense_Rv0106_265_to_stop	normal	125	Rv0106
0.236683083807013	HsdM	sense_Rv0106_206_to_stop	normal	125	Rv0106
0.197637841424733	HsdM	antisense_Rv0106_199_to_stop	normal	125	Rv0106
0.207187835802416	MamB	antisense_ctpI_364_from_start	normal	127	ctpI
0.242669957510938	MamB	sense_ctpI_64_from_start	normal	127	ctpI
0.276820785535375	MamA	697_up_of_ctpI	normal	128	none
0.243170740640839	MamA	700_up_of_ctpI	normal	128	none
0.245042717653588	MamA	484_down_of_Rv0108c	normal	130	none
0.225567554277452	MamA	481_down_of_Rv0108c	normal	130	none
0.215569186263098	MamA	sense_Rv0108c_88_to_stop	normal	131	Rv0108c
0.259672127761897	MamA	antisense_Rv0108c_91_to_stop	normal	131	Rv0108c
0.251336860869286	MamB	65_up_of_Rv0108c	normal	131	none
0.234284404753122	MamA	antisense_Rv0111_508_to_stop	normal	136	Rv0111
0.24342366424535	MamA	sense_Rv0111_505_to_stop	normal	136	Rv0111
0.781033624215666	HsdM	sense_gca_460_from_start	hypervariable	137	gca
0.716230728528213	HsdM	antisense_gca_467_from_start	hypervariable	137	gca
0.21951325682999	HsdM	sense_gmhB_222_from_start	normal	138	gmhB
0.229709817501896	HsdM	antisense_gmhB_229_from_start	normal	138	gmhB
0.259907730416331	MamA	antisense_hddA_298_from_start	normal	139	hddA
0.223947416730901	MamA	sense_hddA_301_from_start	normal	139	hddA
0.240345023477435	HsdM	149_down_of_ldtA	normal	140	none
0.233959865485794	HsdM	142_down_of_ldtA	normal	140	none
0.270464431088344	MamA	sense_ldtA_149_to_stop	normal	140	ldtA
0.306115669020242	MamA	antisense_ldtA_152_to_stop	normal	140	ldtA
0.265836365819777	MamA	antisense_oxyS_16_from_start	normal	141	oxyS
0.257738788108514	MamA	sense_oxyS_19_from_start	normal	141	oxyS
0.227386812478269	MamB	sense_oxyS_28_to_stop	normal	142	oxyS
0.307927373544133	MamA	sense_oxcA_145_to_stop	normal	142	oxcA
0.277115411321004	MamA	antisense_oxcA_148_to_stop	normal	142	oxcA
0.309178889792594	MamA	sense_fusA2_754_from_start	normal	147	fusA2
0.346533392619125	MamA	antisense_fusA2_751_from_start	hypervariable	147	fusA2
0.215777294501496	MamA	8_up_of_fusA2	normal	148	none
0.222051102239548	MamA	11_up_of_fusA2	normal	148	none
0.204906061852707	MamA	antisense_PE_PGRS2_251_from_start	normal	150	PE_PGRS2
0.240858549703071	MamA	sense_PE_PGRS2_254_from_start	normal	150	PE_PGRS2
0.297024483667042	MamA	antisense_ephF_216_from_start	normal	162	ephF
0.250328073049951	MamA	sense_ephF_219_from_start	normal	162	ephF
0.251309577826621	MamB	antisense_cyp138_475_from_start	normal	164	cyp138
0.218138321993136	MamA	antisense_cyp138_400_to_stop	normal	163	cyp138
0.262993049009798	MamA	sense_cyp138_397_to_stop	normal	163	cyp138
0.210359330248052	MamA	sense_msrA_65_to_stop	normal	165	msrA
0.261976425662467	MamA	antisense_msrA_68_to_stop	normal	165	msrA
0.244875446047198	MamA	antisense_Rv0139_403_to_stop	normal	167	Rv0139
0.22883871842557	MamA	sense_Rv0139_400_to_stop	normal	167	Rv0139
0.295278294175947	MamA	sense_Rv0141c_117_from_start	normal	168	Rv0141c
0.213498230076015	MamA	antisense_Rv0141c_114_from_start	normal	168	Rv0141c
0.239072732407435	MamA	antisense_Rv0142_322_to_stop	normal	167	Rv0142
0.189492442979882	MamA	sense_Rv0142_319_to_stop	normal	167	Rv0142
0.232026708448393	MamA	antisense_Rv0142_264_to_stop	normal	169	Rv0142
0.214463552761629	MamA	sense_Rv0142_261_to_stop	normal	169	Rv0142
0.21319291895534	MamA	antisense_Rv0142_115_to_stop	normal	169	Rv0142
0.25154560269519	MamA	sense_Rv0142_112_to_stop	normal	169	Rv0142
0.231011110470946	MamA	sense_Rv0143c_132_to_stop	normal	169	Rv0143c
0.298847420697556	MamA	antisense_Rv0143c_135_to_stop	normal	169	Rv0143c
0.265887228415462	MamB	sense_Rv0145_244_to_stop	normal	172	Rv0145
0.217481134043156	MamB	antisense_Rv0146_424_to_stop	normal	173	Rv0146
0.248651577181129	HsdM	sense_Rv0147_595_from_start	normal	174	Rv0147
0.184744333237745	HsdM	antisense_Rv0147_602_from_start	normal	174	Rv0147
0.254249656123219	MamA	antisense_Rv0148_35_from_start	normal	175	Rv0148
0.207213808189062	MamA	sense_Rv0148_38_from_start	normal	175	Rv0148
0.30129983508921	MamA	antisense_Rv0148_322_to_stop	normal	176	Rv0148
0.213762901766619	MamA	sense_Rv0148_319_to_stop	normal	176	Rv0148
0.227825601449232	MamB	sense_PE1_676_to_stop	normal	178	PE1
0.246272423728216	MamA	sense_PE2_514_from_start	normal	181	PE2
0.281122614197622	MamA	antisense_PE2_511_from_start	normal	181	PE2
0.249797840338535	MamA	sense_fadE2_214_from_start	normal	183	fadE2
0.281190504296917	MamA	antisense_fadE2_211_from_start	normal	183	fadE2
0.280945884200333	MamA	antisense_pntB_400_to_stop	normal	186	pntB
0.267576854558196	MamA	sense_pntB_397_to_stop	normal	186	pntB
0.212007890799214	HsdM	antisense_PE3_117_to_stop	normal	188	PE3
0.238847574935242	HsdM	sense_PE3_124_to_stop	normal	188	PE3
0.219505878888565	MamA	sense_PE4_400_to_stop	normal	190	PE4
0.25943847051757	MamA	antisense_PE4_403_to_stop	normal	190	PE4
0.217359290629149	MamA	antisense_Rv0161_173_from_start	normal	191	Rv0161
0.261553228794901	MamA	sense_Rv0161_176_from_start	normal	191	Rv0161
0.310505196437213	HsdM	sense_Rv0161_280_from_start	normal	191	Rv0161
0.213837469811862	HsdM	antisense_Rv0161_287_from_start	normal	191	Rv0161
0.202189077758004	MamA	antisense_TB18.5_55_to_stop	normal	194	TB18.5
0.213383801147451	MamA	sense_TB18.5_52_to_stop	normal	194	TB18.5
0.236964590807279	MamA	sense_mce1R_223_from_start	normal	195	mce1R
0.241241567264018	MamA	antisense_mce1R_220_from_start	normal	195	mce1R
0.237575825215717	MamA	antisense_fadD5_808_from_start	normal	196	fadD5
0.243858207191371	MamA	sense_fadD5_811_from_start	normal	196	fadD5
0.315437189724324	MamA	antisense_mce1B_91_to_stop	hypervariable	201	mce1B
0.251351639145888	MamA	sense_mce1B_88_to_stop	normal	201	mce1B
0.250362335808624	MamB	sense_mce1D_316_to_stop	normal	204	mce1D
0.200362465417354	MamB	sense_mce1D_259_to_stop	normal	204	mce1D
0.276320718795126	MamA	antisense_mce1F_327_to_stop	normal	207	mce1F
0.244306886014927	MamA	sense_mce1F_324_to_stop	normal	207	mce1F
0.213869920425772	MamB	sense_Rv0175_316_from_start	normal	207	Rv0175
0.255628405177191	MamA	sense_lprO_335_from_start	normal	211	lprO
0.2367602030319	MamA	antisense_lprO_332_from_start	normal	211	lprO
0.309107702719024	MamB	26_down_of_Rv0180c	normal	211	none
0.258389371761172	MamA	sense_sigG_352_from_start	normal	214	sigG
0.244157464687613	MamA	antisense_sigG_349_from_start	normal	214	sigG
0.200664682366854	MamB	antisense_bglS_715_from_start	normal	217	bglS
0.247038395161863	MamB	antisense_Rv0188_49_from_start	normal	220	Rv0188
0.218544960483092	MamA	sense_ilvD_85_from_start	normal	222	ilvD
0.25050221770164	MamA	antisense_ilvD_82_from_start	normal	222	ilvD
0.261592106350952	MamA	16_up_of_Rv0190	normal	222	none
0.250609947740665	MamA	13_up_of_Rv0190	normal	222	none
0.254300969427602	MamB	sense_Rv0190_25_from_start	normal	222	Rv0190
0.287618463008283	MamA	7_down_of_Rv0193c	normal	225	none
0.268215443205785	MamA	4_down_of_Rv0193c	normal	225	none
0.227171509748843	MamA	antisense_Rv0194_1000_from_start	normal	228	Rv0194
0.258931442844039	MamA	sense_Rv0194_1003_from_start	normal	228	Rv0194
0.222954131639832	MamB	antisense_Rv0194_1726_to_stop	normal	229	Rv0194
0.220923383981522	HsdM	sense_Rv0194_379_to_stop	normal	230	Rv0194
0.267900121709539	HsdM	antisense_Rv0194_372_to_stop	normal	230	Rv0194
0.235187223283908	MamA	antisense_Rv0196_220_from_start	normal	232	Rv0196
0.24956644592745	MamA	sense_Rv0196_223_from_start	normal	232	Rv0196
0.196313462424339	MamA	antisense_Rv0197_475_to_stop	normal	234	Rv0197
0.224521812075975	MamA	sense_Rv0197_472_to_stop	normal	234	Rv0197
0.197941084348657	MamA	sense_zmp1_616_from_start	normal	236	zmp1
0.22399289663959	MamA	antisense_zmp1_613_from_start	normal	236	zmp1
0.27821693514582	MamA	99_up_of_mmpL11	normal	242	none
0.23908826554515	MamA	102_up_of_mmpL11	normal	242	none
0.262320204174698	MamA	sense_mmpL3_1192_to_stop	normal	246	mmpL3
0.2382270115034	MamA	antisense_mmpL3_1195_to_stop	normal	246	mmpL3
0.224078975910754	MamB	sense_mmpL3_118_from_start	normal	247	mmpL3
0.234560340948549	MamA	sense_Rv0207c_121_to_stop	normal	248	Rv0207c
0.209455046249466	MamA	antisense_Rv0207c_124_to_stop	normal	248	Rv0207c
0.213462823695973	MamA	antisense_Rv0209_301_to_stop	normal	250	Rv0209
0.223394597675922	MamA	sense_Rv0209_298_to_stop	normal	250	Rv0209
0.226235755419855	MamB	antisense_Rv0210_94_to_stop	normal	252	Rv0210
0.255249178234374	MamA	antisense_pckA_499_from_start	normal	251	pckA
0.211550740861443	MamA	sense_pckA_502_from_start	normal	251	pckA
0.270448725288946	MamA	antisense_pckA_639_from_start	normal	253	pckA
0.241713945816954	MamA	sense_pckA_642_from_start	normal	253	pckA
0.244196312069466	MamA	sense_nadR_373_to_stop	normal	254	nadR
0.214972755404536	MamA	antisense_nadR_376_to_stop	normal	254	nadR
0.19647408984588	MamA	20_up_of_fadD4	normal	256	none
0.238947448148773	MamA	17_up_of_fadD4	normal	256	none
0.224721376026119	MamB	sense_Rv0216_108_to_stop	normal	260	Rv0216
0.242044361610618	MamB	antisense_Rv0218_385_to_stop	normal	262	Rv0218
0.225692766483106	MamA	antisense_Rv0218_272_to_stop	normal	262	Rv0218
0.223540921397048	MamA	sense_Rv0218_269_to_stop	normal	262	Rv0218
0.202237060945297	MamB	sense_lipC_265_from_start	normal	263	lipC
0.465234014666828	MamA	antisense_lipC_331_to_stop	hypervariable	264	lipC
0.421171128092606	MamA	sense_lipC_328_to_stop	hypervariable	264	lipC
0.205908005803241	MamA	antisense_lipC_133_to_stop	normal	264	lipC
0.239821012535304	MamA	sense_lipC_130_to_stop	normal	264	lipC
0.203275603325595	MamB	sense_Rv0221_601_from_start	normal	265	Rv0221
0.272592359979594	MamB	antisense_Rv0224c_46_to_stop	normal	268	Rv0224c
0.254640290015795	MamB	antisense_Rv0225_127_to_stop	normal	270	Rv0225
0.269402248253582	MamB	sense_Rv0227c_118_to_stop	normal	272	Rv0227c
0.24935593245868	MamA	sense_Rv0227c_150_to_stop	normal	272	Rv0227c
0.18387686712284	MamA	antisense_Rv0227c_153_to_stop	normal	272	Rv0227c
0.226722144602105	MamB	sense_Rv0227c_595_from_start	normal	272	Rv0227c
0.240467891904273	MamA	antisense_Rv0232_337_to_stop	normal	278	Rv0232
0.227820620536642	MamA	sense_Rv0232_334_to_stop	normal	278	Rv0232
0.232858615174653	MamB	antisense_gabD1_751_from_start	normal	281	gabD1
0.255226122434438	MamA	sense_Rv0235c_391_from_start	normal	282	Rv0235c
0.264261888339993	MamA	antisense_Rv0235c_388_from_start	normal	282	Rv0235c
0.22445990184497	MamA	sense_Rv0235c_49_from_start	normal	283	Rv0235c
0.241317129581214	MamA	antisense_Rv0235c_46_from_start	normal	283	Rv0235c
0.249939941856565	MamA	sense_aftD_326_to_stop	normal	283	aftD
0.220963039924617	MamA	antisense_aftD_329_to_stop	normal	283	aftD
0.262917066926532	HsdM	sense_lpqI_510_from_start	normal	288	lpqI
0.270095784290385	HsdM	antisense_lpqI_517_from_start	normal	288	lpqI
0.264721748540098	MamA	antisense_vapB24_103_from_start	normal	289	vapB24
0.196991771200602	MamA	sense_vapB24_106_from_start	normal	289	vapB24
0.201353840114711	MamA	sense_fabG4_424_from_start	normal	292	fabG4
0.230525417919447	MamA	antisense_fabG4_421_from_start	normal	292	fabG4
0.282425409981589	MamA	antisense_fadA2_602_to_stop	normal	293	fadA2
0.215238681204237	MamA	sense_fadA2_599_to_stop	normal	293	fadA2
0.21824048197451	MamB	antisense_fadE5_742_to_stop	normal	295	fadE5
0.231445222503473	MamA	antisense_Rv0246_72_to_stop	normal	298	Rv0246
0.299044456553839	MamA	sense_Rv0246_69_to_stop	normal	298	Rv0246
0.259896765339683	MamA	sense_Rv0248c_76_to_stop	normal	299	Rv0248c
0.23685711941352	MamA	antisense_Rv0248c_79_to_stop	normal	299	Rv0248c
0.256191680212245	MamA	sense_Rv0248c_415_from_start	normal	301	Rv0248c
0.209089646943061	MamA	antisense_Rv0248c_412_from_start	normal	301	Rv0248c
0.256932357147052	HsdM	30_up_of_Rv0250c	normal	302	none
0.238570678710717	HsdM	37_up_of_Rv0250c	normal	302	none
0.203777279035126	MamB	antisense_hsp_169_to_stop	normal	303	hsp
0.24061722613826	MamB	antisense_nirB_602_to_stop	normal	305	nirB
0.26777037786645	MamA	antisense_nirB_136_to_stop	normal	305	nirB
0.214926508804931	MamA	sense_nirB_133_to_stop	normal	305	nirB
0.224462645281482	MamA	sense_PPE2_507_to_stop	normal	309	PPE2
0.224776151051939	MamA	antisense_PPE2_510_to_stop	normal	309	PPE2
0.225773628779325	MamB	antisense_Rv0260c_349_from_start	normal	312	Rv0260c
0.24021821115696	MamB	antisense_Rv0260c_334_from_start	normal	311	Rv0260c
0.243732299891688	MamB	sense_Rv0263c_393_from_start	normal	316	Rv0263c
0.252817185935425	MamA	sense_oplA_340_to_stop	normal	318	oplA
0.229894497909823	MamA	antisense_oplA_343_to_stop	normal	318	oplA
0.309335656214679	MamA	sense_oplA_421_from_start	normal	321	oplA
0.228633679334946	MamA	antisense_oplA_418_from_start	normal	321	oplA
0.262931107689979	MamA	sense_Rv0269c_496_from_start	normal	324	Rv0269c
0.298634039969346	MamA	antisense_Rv0269c_493_from_start	normal	324	Rv0269c
0.24869179818122	MamA	antisense_fadD2_43_from_start	normal	325	fadD2
0.21615954679278	MamA	sense_fadD2_46_from_start	normal	325	fadD2
0.261089027099386	MamA	antisense_fadD2_130_from_start	normal	325	fadD2
0.248357798363336	MamA	sense_fadD2_133_from_start	normal	325	fadD2
0.272046873193491	MamA	antisense_fadD2_709_to_stop	normal	326	fadD2
0.209565054023365	MamA	sense_fadD2_706_to_stop	normal	326	fadD2
0.225534088432715	HsdM	sense_fadD2_657_to_stop	normal	326	fadD2
0.242025346899126	HsdM	antisense_fadD2_650_to_stop	normal	326	fadD2
0.240485364221385	MamB	sense_fadE6_922_from_start	normal	328	fadE6
0.220967395380297	MamA	antisense_Rv0276_70_from_start	normal	332	Rv0276
0.252174241047152	MamA	sense_Rv0276_73_from_start	normal	332	Rv0276
0.257068390254786	MamA	sense_Rv0278c_1017_to_stop	normal	335	Rv0278c
0.266022453845913	MamA	antisense_Rv0278c_1020_to_stop	normal	335	Rv0278c
0.250954667954578	MamA	sense_Rv0278c_1302_to_stop	normal	335	Rv0278c
0.260809316088262	MamA	antisense_Rv0278c_1305_to_stop	normal	335	Rv0278c
0.245479497154707	MamA	antisense_PPE3_15_to_stop	normal	344	PPE3
0.253711636699185	MamA	sense_PPE3_12_to_stop	normal	344	PPE3
0.243189082904698	MamB	antisense_Rv0281_442_to_stop	normal	345	Rv0281
0.251361019882611	MamA	antisense_eccA3_673_from_start	normal	346	eccA3
0.195189656040129	MamA	sense_eccA3_676_from_start	normal	346	eccA3
0.257269363000458	MamA	antisense_eccB3_610_from_start	normal	348	eccB3
0.235325837573654	MamA	sense_eccB3_613_from_start	normal	348	eccB3
0.221443751229145	MamA	antisense_eccB3_449_to_stop	normal	348	eccB3
0.279456709980696	MamA	sense_eccB3_446_to_stop	normal	348	eccB3
0.248647082167396	MamA	antisense_eccB3_186_to_stop	normal	344	eccB3
0.258283856962547	MamA	sense_eccB3_183_to_stop	normal	344	eccB3
0.320054826587762	MamA	antisense_eccC3_757_from_start	hypervariable	345	eccC3
0.243827263347461	MamA	sense_eccC3_760_from_start	normal	345	eccC3
0.206509099629932	HsdM	sense_eccC3_1054_from_start	normal	350	eccC3
0.255651512450133	HsdM	antisense_eccC3_1061_from_start	normal	350	eccC3
0.273489632273662	MamB	antisense_eccC3_1675_from_start	normal	350	eccC3
0.250630505965385	MamA	antisense_eccC3_891_to_stop	normal	352	eccC3
0.316713432134016	MamA	sense_eccC3_888_to_stop	hypervariable	352	eccC3
0.239776085572982	MamA	antisense_PPE4_99_from_start	normal	353	PPE4
0.250592017685832	MamA	sense_PPE4_102_from_start	normal	353	PPE4
0.25650341663315	MamA	antisense_eccD3_481_to_stop	normal	357	eccD3
0.219257869888485	MamA	sense_eccD3_478_to_stop	normal	357	eccD3
0.3103580428459	MamA	antisense_eccE3_280_to_stop	normal	360	eccE3
0.27718046721727	MamA	sense_eccE3_277_to_stop	normal	360	eccE3
0.23903990133486	HsdM	antisense_Rv0293c_546_from_start	normal	361	Rv0293c
0.22231995056081	HsdM	sense_Rv0293c_539_from_start	normal	361	Rv0293c
0.222120727247319	MamA	12_up_of_Rv0296c	normal	364	none
0.272824193732132	MamA	15_up_of_Rv0296c	normal	364	none
0.252105353539576	MamB	antisense_Rv0298_103_to_stop	normal	362	Rv0298
0.238159907320018	MamA	sense_PPE5_2434_from_start	normal	373	PPE5
0.307859791910547	MamA	antisense_PPE5_2431_from_start	normal	373	PPE5
0.242260888196364	HsdM	antisense_PPE5_2398_from_start	normal	369	PPE5
0.169635369812591	HsdM	sense_PPE5_2391_from_start	normal	369	PPE5
0.279672005480858	MamA	sense_PPE6_470_from_start	normal	378	PPE6
0.253267386045669	MamA	antisense_PPE6_467_from_start	normal	378	PPE6
0.237333881309025	MamB	antisense_Rv0308_158_from_start	normal	380	Rv0308
0.209702788540247	MamA	antisense_Rv0311_331_to_stop	normal	383	Rv0311
0.27713984164677	MamA	sense_Rv0311_328_to_stop	normal	383	Rv0311
0.237021862334007	MamA	sense_Rv0314c_43_from_start	normal	387	Rv0314c
0.231822513991761	MamA	antisense_Rv0314c_40_from_start	normal	387	Rv0314c
0.226842648283928	MamA	antisense_Rv0316_199_from_start	normal	388	Rv0316
0.314863029914849	MamA	sense_Rv0316_202_from_start	hypervariable	388	Rv0316
0.238071190901452	MamB	antisense_glpQ2_218_to_stop	normal	384	glpQ2
0.206405178414659	HsdM	sense_Rv0320_97_from_start	normal	391	Rv0320
0.236355305938707	HsdM	antisense_Rv0320_104_from_start	normal	391	Rv0320
0.202384803818568	MamA	antisense_dcd_253_from_start	normal	392	dcd
0.20633733980633	MamA	sense_dcd_256_from_start	normal	392	dcd
0.214998416492609	MamA	antisense_dcd_190_to_stop	normal	392	dcd
0.230442290749908	MamA	sense_dcd_187_to_stop	normal	392	dcd
0.215327411394202	MamB	antisense_udgA_463_to_stop	normal	393	udgA
0.253648196626497	MamA	sense_Rv0330c_350_from_start	normal	399	Rv0330c
0.235383218807872	MamA	antisense_Rv0330c_347_from_start	normal	399	Rv0330c
0.266014573793083	MamA	antisense_rmlA_400_to_stop	normal	402	rmlA
0.268013643790387	MamA	sense_rmlA_397_to_stop	normal	402	rmlA
0.26517267164136	MamA	antisense_rmlA_151_to_stop	normal	398	rmlA
0.331734412457956	MamA	sense_rmlA_148_to_stop	hypervariable	398	rmlA
0.559685502628905	MamA	antisense_rmlA_22_to_stop	hypervariable	403	rmlA
0.46554415861085	MamA	sense_rmlA_19_to_stop	hypervariable	403	rmlA
0.207543629266596	MamA	sense_Rv0338c_1312_from_start	normal	408	Rv0338c
0.257442922052736	MamA	antisense_Rv0338c_1309_from_start	normal	408	Rv0338c
0.210057612463927	MamA	sense_Rv0339c_603_to_stop	normal	410	Rv0339c
0.227960682983593	MamA	antisense_Rv0339c_606_to_stop	normal	410	Rv0339c
0.226742493462238	MamB	sense_Rv0339c_1142_from_start	normal	410	Rv0339c
0.211521383375759	MamA	antisense_iniB_435_to_stop	normal	409	iniB
0.255317149023606	MamA	sense_iniB_432_to_stop	normal	409	iniB
0.218675095101249	MamA	antisense_iniC_472_to_stop	normal	417	iniC
0.232988033248373	MamA	sense_iniC_469_to_stop	normal	417	iniC
0.214784850019177	HsdM	antisense_ansP2_115_to_stop	normal	419	ansP2
0.210148589624964	HsdM	sense_ansP2_122_to_stop	normal	419	ansP2
0.255786508491406	MamA	sense_ansP2_484_from_start	normal	420	ansP2
0.272231002117833	MamA	antisense_ansP2_481_from_start	normal	420	ansP2
0.253683346200646	MamA	antisense_Rv0347_214_to_stop	normal	421	Rv0347
0.232389994088023	MamA	sense_Rv0347_211_to_stop	normal	421	Rv0347
0.28594862334826	MamA	antisense_Rv0348_193_from_start	normal	422	Rv0348
0.21954693489781	MamA	sense_Rv0348_196_from_start	normal	422	Rv0348
0.240660393532864	MamA	antisense_Rv0348_318_to_stop	normal	422	Rv0348
0.278088615770678	MamA	sense_Rv0348_315_to_stop	normal	422	Rv0348
0.180078279367727	MamA	antisense_Rv0348_175_to_stop	normal	422	Rv0348
0.249804396661844	MamA	sense_Rv0348_172_to_stop	normal	422	Rv0348
0.211750805705517	MamA	antisense_Rv0349_10_from_start	normal	422	Rv0349
0.232432065066642	MamA	sense_Rv0349_13_from_start	normal	422	Rv0349
0.202551033591141	MamA	antisense_Rv0349_130_from_start	normal	422	Rv0349
0.286023292572983	MamA	sense_Rv0349_133_from_start	normal	422	Rv0349
0.277070164279538	MamA	antisense_dnaK_96_from_start	normal	423	dnaK
0.231274045122366	MamA	sense_dnaK_99_from_start	normal	423	dnaK
0.267187922717676	MamA	antisense_dnaK_541_from_start	normal	423	dnaK
0.239592936270278	MamA	sense_dnaK_544_from_start	normal	423	dnaK
0.218169392629809	MamA	antisense_grpE_118_to_stop	normal	425	grpE
0.225378420903717	MamA	sense_grpE_115_to_stop	normal	425	grpE
0.218911415835053	HsdM	sense_dnaJ1_366_from_start	normal	426	dnaJ1
0.28541863653927	HsdM	antisense_dnaJ1_373_from_start	normal	426	dnaJ1
0.207706391003879	MamA	antisense_dnaJ1_448_from_start	normal	426	dnaJ1
0.214526126253231	MamA	sense_dnaJ1_451_from_start	normal	426	dnaJ1
0.253560886070605	MamB	antisense_dnaJ1_181_to_stop	normal	422	dnaJ1
0.238212406272168	MamA	sense_PPE8_2710_from_start	normal	435	PPE8
0.251310893417306	MamA	antisense_PPE8_2707_from_start	normal	435	PPE8
0.221887066756533	MamA	sense_purA_637_from_start	normal	439	purA
0.233654543163529	MamA	antisense_purA_634_from_start	normal	439	purA
0.310093701217513	MamA	sense_purA_574_from_start	normal	439	purA
0.25627346255363	MamA	antisense_purA_571_from_start	normal	439	purA
0.201340299177669	HsdM	antisense_purA_436_from_start	normal	439	purA
0.248550921112372	HsdM	sense_purA_429_from_start	normal	439	purA
0.224945001159585	MamA	antisense_Rv0359_208_to_stop	normal	441	Rv0359
0.20678722244492	MamA	sense_Rv0359_205_to_stop	normal	441	Rv0359
0.261598122589461	MamA	antisense_Rv0359_17_to_stop	normal	441	Rv0359
0.197982753846349	MamA	sense_Rv0359_14_to_stop	normal	441	Rv0359
0.242329844819474	MamA	antisense_Rv0361_11_to_stop	normal	443	Rv0361
0.228856492379432	MamA	sense_Rv0361_8_to_stop	normal	443	Rv0361
0.261420925738009	MamA	antisense_mgtE_355_from_start	normal	443	mgtE
0.261116316586925	MamA	sense_mgtE_358_from_start	normal	443	mgtE
0.2245950617026	MamB	antisense_mgtE_373_from_start	normal	443	mgtE
0.203460610704107	MamA	sense_Rv0366c_23_to_stop	normal	447	Rv0366c
0.217835313472877	MamA	antisense_Rv0366c_26_to_stop	normal	447	Rv0366c
0.209610294748798	MamA	sense_Rv0367c_178_to_stop	normal	448	Rv0367c
0.277834250881788	MamA	antisense_Rv0367c_181_to_stop	normal	448	Rv0367c
0.24534135536468	HsdM	antisense_Rv0368c_301_to_stop	normal	449	Rv0368c
0.238626422035895	HsdM	sense_Rv0368c_308_to_stop	normal	449	Rv0368c
0.307824996880526	MamA	sense_Rv0368c_526_from_start	normal	449	Rv0368c
0.232371315325015	MamA	antisense_Rv0368c_523_from_start	normal	449	Rv0368c
0.25400304941413	MamA	sense_Rv0369c_8_from_start	normal	450	Rv0369c
0.281143670002988	MamA	antisense_Rv0369c_5_from_start	normal	450	Rv0369c
0.221774110901448	MamA	16_up_of_Rv0369c	normal	450	none
0.257514300318724	MamA	19_up_of_Rv0369c	normal	450	none
0.210844903164624	MamA	35_up_of_Rv0369c	normal	450	none
0.243916455253793	MamA	38_up_of_Rv0369c	normal	450	none
0.294648482366867	MamA	sense_Rv0370c_445_to_stop	normal	451	Rv0370c
0.297911014217555	MamA	antisense_Rv0370c_448_from_start	normal	451	Rv0370c
0.428555106605528	MamA	sense_Rv0370c_392_from_start	hypervariable	451	Rv0370c
0.301604492384296	MamA	antisense_Rv0370c_389_from_start	normal	451	Rv0370c
0.270406013912816	MamB	antisense_Rv0371c_65_to_stop	normal	451	Rv0371c
0.280086104346624	MamA	sense_Rv0372c_310_from_start	normal	452	Rv0372c
0.183302104481101	MamA	antisense_Rv0372c_307_from_start	normal	452	Rv0372c
0.280770671489045	MamA	sense_Rv0373c_499_from_start	normal	454	Rv0373c
0.312411460758427	MamA	antisense_Rv0373c_496_from_start	normal	454	Rv0373c
0.543828598159515	MamA	sense_Rv0375c_347_to_stop	hypervariable	456	Rv0375c
0.343834629836802	MamA	antisense_Rv0375c_350_to_stop	hypervariable	456	Rv0375c
0.234919882622421	MamA	antisense_Rv0377_288_from_start	normal	458	Rv0377
0.254034644889129	MamA	sense_Rv0377_291_from_start	normal	458	Rv0377
0.225578540048495	MamA	antisense_Rv0377_277_to_stop	normal	453	Rv0377
0.224427940365001	MamA	sense_Rv0377_274_to_stop	normal	453	Rv0377
0.237095078350187	MamB	115_down_of_Rv0377	normal	459	none
0.211309044375786	MamA	antisense_Rv0378_90_to_stop	normal	459	Rv0378
0.24163371748757	MamA	sense_Rv0378_87_to_stop	normal	459	Rv0378
0.280563098464106	MamA	sense_Rv0380c_202_to_stop	normal	455	Rv0380c
0.260946417141606	MamA	antisense_Rv0380c_205_to_stop	normal	455	Rv0380c
0.201658414556288	MamA	sense_Rv0380c_268_to_stop	normal	460	Rv0380c
0.202540744149968	MamA	antisense_Rv0380c_271_to_stop	normal	460	Rv0380c
0.21857938436533	MamA	sense_Rv0381c_268_to_stop	normal	460	Rv0381c
0.22605700799944	MamA	antisense_Rv0381c_271_to_stop	normal	460	Rv0381c
0.222612526042119	MamA	sense_PPE9_63_from_start	normal	471	PPE9
0.243628384270698	MamA	antisense_PPE9_60_from_start	normal	471	PPE9
0.257523768052043	MamB	37_up_of_PPE9	normal	471	none
0.225048172911849	MamB	sense_metZ_490_from_start	normal	469	metZ
0.260417838340107	MamA	sense_ndhA_250_to_stop	normal	470	ndhA
0.265173291206134	MamA	antisense_ndhA_253_to_stop	normal	470	ndhA
0.222520545946465	MamA	sense_ndhA_436_from_start	normal	475	ndhA
0.278325667053761	MamA	antisense_ndhA_433_from_start	normal	475	ndhA
0.221422974732931	MamA	sense_Rv0394c_54_to_stop	normal	472	Rv0394c
0.313061145384838	MamA	antisense_Rv0394c_57_to_stop	normal	472	Rv0394c
0.305872970789063	MamA	sense_fadE7_85_to_stop	normal	482	fadE7
0.276266461692647	MamA	antisense_fadE7_88_to_stop	normal	482	fadE7
0.382833881081219	MamA	sense_fadE7_118_to_stop	hypervariable	482	fadE7
0.586882816780644	MamA	antisense_fadE7_121_to_stop	hypervariable	482	fadE7
0.237019497134471	MamA	sense_fadE7_280_from_start	normal	478	fadE7
0.305136668038914	MamA	antisense_fadE7_277_from_start	normal	478	fadE7
0.160620543392711	MamA	sense_mmpL1_253_from_start	normal	486	mmpL1
0.317863816725259	MamA	antisense_mmpL1_250_from_start	hypervariable	486	mmpL1
0.192325206869391	MamA	antisense_fadD30_489_from_start	normal	483	fadD30
0.232582850604871	MamA	sense_fadD30_492_from_start	normal	483	fadD30
0.197661594128844	HsdM	sense_fgd1_281_from_start	normal	489	fgd1
0.237718723700607	HsdM	antisense_fgd1_288_from_start	normal	489	fgd1
0.233604645353879	MamB	antisense_fgd1_394_from_start	normal	489	fgd1
0.255644094459218	MamA	antisense_fgd1_49_to_stop	normal	495	fgd1
0.217513745643514	MamA	sense_fgd1_46_to_stop	normal	495	fgd1
0.269224665729667	MamA	antisense_pta_574_to_stop	normal	492	pta
0.254484963023223	MamA	sense_pta_571_to_stop	normal	492	pta
0.197279253271494	HsdM	sense_pta_181_to_stop	normal	497	pta
0.277179862469874	HsdM	antisense_pta_174_to_stop	normal	497	pta
0.226162387927796	MamB	sense_ackA_357_from_start	normal	492	ackA
0.206461409235731	MamA	sense_pknG_775_from_start	normal	495	pknG
0.247579240325572	MamA	antisense_pknG_772_from_start	normal	500	pknG
0.25781545294248	MamA	antisense_thiO_507_from_start	normal	505	thiO
0.26462955788389	MamA	sense_thiO_510_from_start	normal	505	thiO
0.245360414700475	HsdM	sense_thiO_214_to_stop	normal	500	thiO
0.2380154904707	HsdM	antisense_thiO_207_to_stop	normal	500	thiO
0.241713402201722	HsdM	antisense_thiD_330_from_start	normal	506	thiD
0.254595719208292	HsdM	sense_thiD_323_from_start	normal	506	thiD
0.23224757302884	MamA	sense_thiC_622_from_start	normal	513	thiC
0.306876244390755	MamA	antisense_thiC_619_from_start	normal	513	thiC
0.242990962149587	MamA	sense_ctpH_87_to_stop	normal	514	ctpH
0.257145699976617	MamA	antisense_ctpH_90_to_stop	normal	514	ctpH
0.270222682649947	MamB	antisense_ctpH_2206_from_start	normal	511	ctpH
0.221694131786416	MamA	sense_ctpH_1659_from_start	normal	517	ctpH
0.24623456691218	MamA	antisense_ctpH_1656_from_start	normal	517	ctpH
0.217528748779462	MamA	sense_ctpH_1601_from_start	normal	517	ctpH
0.326582869674202	MamA	antisense_ctpH_1598_from_start	hypervariable	517	ctpH
0.250597787463457	MamB	sense_xthA_160_to_stop	normal	514	xthA
0.235774059312932	MamA	sense_xthA_302_to_stop	normal	515	xthA
0.259088344432203	MamA	antisense_xthA_305_to_stop	normal	515	xthA
0.253539428212778	MamB	antisense_xthA_400_to_stop	normal	515	xthA
0.275549060958135	MamA	sense_xthA_327_from_start	normal	520	xthA
0.225599062686268	MamA	antisense_xthA_324_from_start	normal	520	xthA
0.298434164836356	HsdM	antisense_def_122_to_stop	normal	516	def
0.267089278445438	HsdM	sense_def_129_to_stop	normal	516	def
0.282677156820988	MamB	sense_sodC_32_from_start	normal	523	sodC
0.223813094281145	MamA	antisense_Rv0433_415_to_stop	normal	519	Rv0433
0.215698546392716	MamA	sense_Rv0433_412_to_stop	normal	519	Rv0433
0.230845917195867	MamA	antisense_Rv0433_163_to_stop	normal	520	Rv0433
0.198680497133714	MamA	sense_Rv0433_160_to_stop	normal	520	Rv0433
0.259210711957719	MamA	sense_Rv0435c_1045_to_stop	normal	522	Rv0435c
0.292419893558138	MamA	antisense_Rv0435c_1048_to_stop	normal	522	Rv0435c
0.261227371178508	HsdM	antisense_moeA2_325_to_stop	normal	525	moeA2
0.235049206106388	HsdM	sense_moeA2_332_to_stop	normal	525	moeA2
0.23766721861685	MamB	sense_Rv0439c_151_to_stop	normal	526	Rv0439c
0.23404851152677	MamB	antisense_Rv0439c_178_to_stop	normal	531	Rv0439c
0.240674398640129	MamA	antisense_groEL2_181_from_start	normal	527	groEL2
0.222502876850345	MamA	sense_groEL2_184_from_start	normal	527	groEL2
0.20186897648415	MamA	antisense_groEL2_637_from_start	normal	527	groEL2
0.197616296358376	MamA	sense_groEL2_640_from_start	normal	527	groEL2
0.258127152600434	MamA	antisense_groEL2_703_to_stop	normal	528	groEL2
0.220542348433083	MamA	sense_groEL2_700_to_stop	normal	528	groEL2
0.228896452602801	MamA	antisense_groEL2_292_to_stop	normal	528	groEL2
0.199558056785535	MamA	sense_groEL2_289_to_stop	normal	528	groEL2
0.214749128896421	MamA	antisense_groEL2_253_to_stop	normal	528	groEL2
0.220013221145909	MamA	sense_groEL2_250_to_stop	normal	528	groEL2
0.22248726195604	MamB	antisense_Rv0441c_23_to_stop	normal	529	Rv0441c
0.25648274639805	MamB	sense_sigK_142_to_stop	normal	532	sigK
0.231747684986029	MamB	antisense_sigK_133_from_start	normal	533	sigK
0.368829074132246	HsdM	antisense_Rv0446c_290_to_stop	hypervariable	538	Rv0446c
0.358082801913113	HsdM	sense_Rv0446c_297_to_stop	hypervariable	538	Rv0446c
0.245411751565017	MamB	sense_ufaA1_256_to_stop	normal	534	ufaA1
0.229970537799319	MamB	antisense_Rv0448c_145_to_stop	normal	540	Rv0448c
0.223507825489817	MamB	antisense_Rv0448c_148_from_start	normal	535	Rv0448c
0.270645019243566	MamB	antisense_Rv0449c_433_from_start	normal	536	Rv0449c
0.303182022732011	MamA	sense_mmpL4_1184_to_stop	normal	543	mmpL4
0.343363400634282	MamA	antisense_mmpL4_1187_to_stop	hypervariable	543	mmpL4
0.388404456378785	MamA	71_up_of_Rv0452	hypervariable	540	none
0.247329882022317	MamA	68_up_of_Rv0452	normal	540	none
0.234480171860857	MamA	antisense_Rv0452_109_from_start	normal	540	Rv0452
0.22330035225969	MamA	sense_Rv0452_112_from_start	normal	545	Rv0452
0.215894710194471	MamA	antisense_PPE11_280_from_start	normal	542	PPE11
0.230719506270859	MamA	sense_PPE11_283_from_start	normal	542	PPE11
0.223791434557999	MamA	antisense_Rv0454_116_to_stop	normal	543	Rv0454
0.19202286689733	MamA	sense_Rv0454_113_to_stop	normal	543	Rv0454
0.277010844853343	MamB	antisense_Rv0455c_22_from_start	normal	549	Rv0455c
0.281399887264393	HsdM	antisense_mazE1_27_from_start	normal	546	mazE1
0.248523040653785	HsdM	sense_mazE1_20_from_start	normal	546	mazE1
0.200865033178171	MamB	sense_Rv0457c_538_to_stop	normal	546	Rv0457c
0.229029613341349	MamA	sense_Rv0457c_875_to_stop	normal	547	Rv0457c
0.225328879437988	MamA	antisense_Rv0457c_878_to_stop	normal	547	Rv0457c
0.218570665384807	MamA	antisense_Rv0458_687_from_start	normal	549	Rv0458
0.235723404735583	MamA	sense_Rv0458_690_from_start	normal	549	Rv0458
0.207276507187305	MamA	antisense_Rv0458_568_to_stop	normal	554	Rv0458
0.213650848721109	MamA	sense_Rv0458_565_to_stop	normal	554	Rv0458
0.204056299497466	MamA	sense_Rv0465c_386_to_stop	normal	554	Rv0465c
0.25033633893103	MamA	antisense_Rv0465c_389_to_stop	normal	554	Rv0465c
0.207136038844829	MamA	sense_Rv0465c_646_from_start	normal	559	Rv0465c
0.23951481701304	MamA	antisense_Rv0465c_643_from_start	normal	559	Rv0465c
0.241062190425214	MamA	sense_Rv0465c_85_from_start	normal	554	Rv0465c
0.232200618838749	MamA	antisense_Rv0465c_82_from_start	normal	554	Rv0465c
0.264283866032018	MamA	antisense_Rv0466_136_to_stop	normal	555	Rv0466
0.22478613198629	MamA	sense_Rv0466_133_to_stop	normal	555	Rv0466
0.238488408555141	MamA	antisense_icl1_112_from_start	normal	561	icl1
0.208188383164293	MamA	sense_icl1_115_from_start	normal	561	icl1
0.220752105193815	MamA	antisense_fadB2_154_from_start	normal	557	fadB2
0.230466580891065	MamA	sense_fadB2_157_from_start	normal	557	fadB2
0.224981746030158	MamA	antisense_fadB2_363_from_start	normal	558	fadB2
0.259414066428849	MamA	sense_fadB2_366_from_start	normal	558	fadB2
0.20781735803229	MamA	sense_pcaA_361_from_start	normal	560	pcaA
0.253831719570924	MamA	antisense_pcaA_358_from_start	normal	560	pcaA
0.245859977899891	MamA	sense_pcaA_345_from_start	normal	560	pcaA
0.22976982906337	MamA	antisense_pcaA_342_from_start	normal	560	pcaA
0.232364196551427	HsdM	antisense_Rv0471c_210_to_stop	normal	561	Rv0471c
0.228087708201933	HsdM	sense_Rv0471c_217_to_stop	normal	561	Rv0471c
0.243483119368239	MamA	sense_Rv0472c_98_to_stop	normal	566	Rv0472c
0.296471332965077	MamA	antisense_Rv0472c_101_to_stop	normal	566	Rv0472c
0.216317267572863	MamB	sense_Rv0472c_241_from_start	normal	561	Rv0472c
0.230636794098998	MamB	antisense_Rv0473_457_from_start	normal	562	Rv0473
0.216232594914512	MamB	antisense_Rv0473_568_from_start	normal	562	Rv0473
0.248443648289643	MamB	antisense_Rv0473_235_to_stop	normal	568	Rv0473
0.242426422149705	MamA	84_up_of_hbhA	normal	569	none
0.185988150519994	MamA	81_up_of_hbhA	normal	569	none
0.222852655890359	MamB	antisense_hbhA_103_from_start	normal	569	hbhA
0.238769785893062	MamB	antisense_hbhA_211_from_start	normal	564	hbhA
0.231977334739018	HsdM	sense_Rv0476_73_from_start	normal	570	Rv0476
0.23741280224668	HsdM	antisense_Rv0476_80_from_start	normal	570	Rv0476
0.229577218294573	MamB	antisense_deoC_129_from_start	normal	566	deoC
0.230675539136269	MamA	sense_Rv0479c_137_to_stop	normal	566	Rv0479c
0.257213321385078	MamA	antisense_Rv0479c_140_to_stop	normal	566	Rv0479c
0.270929466878367	MamA	antisense_murB_353_to_stop	normal	570	murB
0.263764147628248	MamA	sense_murB_350_to_stop	normal	570	murB
0.243223339812158	MamA	sense_Rv0484c_219_to_stop	normal	572	Rv0484c
0.267869917566074	MamA	antisense_Rv0484c_222_to_stop	normal	572	Rv0484c
0.275073151382331	MamA	antisense_Rv0485_475_to_stop	normal	573	Rv0485
0.180771754338777	MamA	sense_Rv0485_472_to_stop	normal	573	Rv0485
0.279646038253975	MamB	antisense_Rv0485_274_to_stop	normal	573	Rv0485
0.260418365678009	MamB	antisense_mshA_592_to_stop	normal	574	mshA
0.221186278530945	MamA	antisense_regX3_271_from_start	normal	579	regX3
0.298286349372962	MamA	sense_regX3_274_from_start	normal	579	regX3
0.229563277572224	MamA	antisense_regX3_292_to_stop	normal	579	regX3
0.223967053392343	MamA	sense_regX3_289_to_stop	normal	579	regX3
0.268726988515788	MamA	sense_Rv0492c_381_to_stop	normal	580	Rv0492c
0.215125688031166	MamA	antisense_Rv0492c_384_to_stop	normal	580	Rv0492c
0.244044474415813	MamA	sense_Rv0492c_826_from_start	normal	581	Rv0492c
0.238856163141468	MamA	antisense_Rv0492c_823_from_start	normal	581	Rv0492c
0.265998117638832	MamA	antisense_Rv0494_328_from_start	normal	583	Rv0494
0.204316029370123	MamA	sense_Rv0494_331_from_start	normal	583	Rv0494
0.260896784816378	MamB	antisense_Rv0496_271_from_start	normal	590	Rv0496
0.24537825982335	HsdM	sense_Rv0497_68_to_stop	normal	592	Rv0497
0.234407274598399	HsdM	antisense_Rv0497_61_to_stop	normal	592	Rv0497
0.261573869715662	MamA	antisense_proC_220_to_stop	normal	589	proC
0.273202931203805	MamA	sense_proC_217_to_stop	normal	589	proC
0.228049654862484	MamB	sense_Rv0502_452_from_start	normal	597	Rv0502
0.256113289185875	MamB	sense_cmaA2_34_from_start	normal	593	cmaA2
0.258559007848869	MamA	sense_Rv0504c_217_from_start	normal	593	Rv0504c
0.223623999355157	MamA	antisense_Rv0504c_214_from_start	normal	593	Rv0504c
0.360713210632212	MamA	antisense_mmpL2_775_to_stop	hypervariable	598	mmpL2
0.285388793868521	MamA	sense_mmpL2_772_to_stop	normal	598	mmpL2
0.230340030294738	HsdM	sense_mmpL2_218_to_stop	normal	598	mmpL2
0.27476333736098	HsdM	antisense_mmpL2_211_to_stop	normal	598	mmpL2
0.206777705604894	MamB	antisense_Rv0508_48_from_start	normal	598	Rv0508
0.237039242597633	MamB	antisense_Rv0508_58_to_stop	normal	599	Rv0508
0.228120389684614	MamA	antisense_hemC_241_to_stop	normal	601	hemC
0.302884943056125	MamA	sense_hemC_238_to_stop	normal	601	hemC
0.272452565026297	MamA	antisense_hemD_236_to_stop	normal	603	hemD
0.204772732477872	MamA	sense_hemD_233_to_stop	normal	603	hemD
0.23694895947882	MamB	antisense_hemB_280_to_stop	normal	604	hemB
0.212065046881981	MamB	60_down_of_Rv0518	normal	609	none
0.210579712705905	MamB	antisense_Rv0520_34_to_stop	normal	611	Rv0520
0.210522074587613	MamB	10_down_of_Rv0521	normal	611	none
0.286164767247408	MamA	antisense_Rv0528_183_from_start	normal	617	Rv0528
0.237493985984064	MamA	sense_Rv0528_186_from_start	normal	617	Rv0528
0.229514733576238	MamA	antisense_Rv0530_436_to_stop	normal	620	Rv0530
0.267277821529813	MamA	sense_Rv0530_433_to_stop	normal	620	Rv0530
0.289196537022762	MamA	antisense_Rv0530_176_to_stop	normal	620	Rv0530
0.217937785237345	MamA	sense_Rv0530_173_to_stop	normal	620	Rv0530
0.231358056526177	MamB	antisense_Rv0531_31_to_stop	normal	621	Rv0531
0.243694148888369	MamB	antisense_menA_76_to_stop	normal	624	menA
0.246610571894234	HsdM	antisense_menA_79_to_stop	normal	624	menA
0.272571082817058	HsdM	sense_menA_86_to_stop	normal	624	menA
0.281296721047459	MamB	sense_menA_394_to_stop	normal	624	menA
0.207053759825917	MamB	antisense_galE3_31_to_stop	normal	627	galE3
0.248079731331879	MamA	antisense_Rv0538_183_to_stop	normal	630	Rv0538
0.279115114460009	MamA	sense_Rv0538_180_to_stop	normal	630	Rv0538
0.180636272830468	MamA	antisense_Rv0539_151_to_stop	normal	631	Rv0539
0.26015029197182	MamA	sense_Rv0539_148_to_stop	normal	631	Rv0539
0.271137061910339	MamB	7_down_of_Rv0543c	normal	634	none
0.265923075346994	MamA	sense_pitA_384_from_start	normal	635	pitA
0.250602458980038	MamA	antisense_pitA_381_from_start	normal	635	pitA
0.227498461893982	MamB	antisense_pitA_367_from_start	normal	635	pitA
0.247808279434823	MamA	sense_pitA_238_from_start	normal	636	pitA
0.227315074760543	MamA	antisense_pitA_235_from_start	normal	636	pitA
0.244383051334976	MamA	sense_menB_23_to_stop	normal	637	menB
0.242655659769344	MamA	antisense_menB_26_to_stop	normal	637	menB
0.367244921678701	MamA	sense_menB_226_to_stop	hypervariable	638	menB
0.307295876974599	MamA	antisense_menB_229_to_stop	normal	638	menB
0.243450622178861	MamA	sense_menB_412_from_start	normal	638	menB
0.216131036987842	MamA	antisense_menB_409_from_start	normal	638	menB
0.553837728115108	MamA	sense_menB_11_from_start	hypervariable	638	menB
0.47869218452248	MamA	antisense_menB_8_from_start	hypervariable	638	menB
0.266303910081999	MamA	sense_vapC3_135_to_stop	normal	639	vapC3
0.254198613751194	MamA	antisense_vapC3_138_to_stop	normal	639	vapC3
0.231737238681215	MamA	sense_vapC3_190_to_stop	normal	639	vapC3
0.249078689300613	MamA	antisense_vapC3_193_to_stop	normal	639	vapC3
0.249819364207784	MamA	sense_fadD8_496_from_start	normal	641	fadD8
0.257637902919726	MamA	antisense_fadD8_493_from_start	normal	641	fadD8
0.3476989459396	MamA	antisense_Rv0552_214_from_start	hypervariable	641	Rv0552
0.236960399473902	MamA	sense_Rv0552_217_from_start	normal	641	Rv0552
0.22033213879458	MamA	antisense_menC_275_to_stop	normal	649	menC
0.288797476194011	MamA	sense_menC_272_to_stop	normal	644	menC
0.194246864664335	MamA	antisense_bpoC_346_to_stop	normal	644	bpoC
0.198226284903082	MamA	sense_bpoC_343_to_stop	normal	644	bpoC
0.215383876247491	MamA	sense_Rv0561c_390_to_stop	normal	650	Rv0561c
0.376873439777627	MamA	antisense_Rv0561c_393_to_stop	hypervariable	650	Rv0561c
0.235900479495032	MamB	antisense_htpX_385_from_start	normal	653	htpX
0.20335291679013	MamA	antisense_htpX_22_to_stop	normal	653	htpX
0.245179841203181	MamA	sense_htpX_19_to_stop	normal	653	htpX
0.20253742314726	HsdM	antisense_Rv0565c_643_to_stop	normal	655	Rv0565c
0.26535893623087	HsdM	sense_Rv0565c_650_to_stop	normal	655	Rv0565c
0.203978448443399	MamA	15_down_of_Rv0566c	normal	656	none
0.239037124591385	MamA	12_down_of_Rv0566c	normal	656	none
0.23825090846307	MamA	antisense_Rv0567_26_to_stop	normal	658	Rv0567
0.251269406995228	MamA	sense_Rv0567_23_to_stop	normal	658	Rv0567
0.218125189781321	MamA	antisense_cyp135B1_591_from_start	normal	658	cyp135B1
0.211873626445035	MamA	sense_cyp135B1_594_from_start	normal	658	cyp135B1
0.245751948948212	MamA	antisense_cyp135B1_598_to_stop	normal	659	cyp135B1
0.209896637640932	MamA	sense_cyp135B1_595_to_stop	normal	659	cyp135B1
0.219666372254474	HsdM	sense_cyp135B1_349_to_stop	normal	659	cyp135B1
0.210865570698993	HsdM	antisense_cyp135B1_342_to_stop	normal	659	cyp135B1
0.195102124115011	MamB	antisense_nrdZ_198_from_start	normal	660	nrdZ
0.246087711351279	MamA	antisense_nrdZ_653_from_start	normal	660	nrdZ
0.207372364352562	MamA	sense_nrdZ_656_from_start	normal	660	nrdZ
0.275097110336843	MamA	antisense_nrdZ_424_to_stop	normal	661	nrdZ
0.217418332748478	MamA	sense_nrdZ_421_to_stop	normal	661	nrdZ
0.1914186284553	HsdM	160_up_of_Rv0572c	normal	664	none
0.204279144029791	HsdM	167_up_of_Rv0572c	normal	664	none
0.240899863227109	MamA	sense_pncB2_365_to_stop	normal	665	pncB2
0.279364120156954	MamA	antisense_pncB2_368_to_stop	normal	665	pncB2
0.343010777793158	MamB	antisense_pncB2_217_from_start	hypervariable	665	pncB2
0.280833923086484	MamA	sense_Rv0574c_37_to_stop	normal	666	Rv0574c
0.297157652823257	MamA	antisense_Rv0574c_40_to_stop	normal	666	Rv0574c
0.261988504755537	MamA	sense_Rv0574c_256_from_start	normal	666	Rv0574c
0.274348514425598	MamA	antisense_Rv0574c_253_from_start	normal	666	Rv0574c
0.27500243276747	MamB	antisense_Rv0575c_543_from_start	normal	668	Rv0575c
0.238493171997442	MamA	antisense_Rv0576_237_from_start	normal	668	Rv0576
0.248554789518121	MamA	sense_Rv0576_240_from_start	normal	668	Rv0576
0.27361224505466	MamA	antisense_Rv0579_118_from_start	normal	675	Rv0579
0.248262512371728	MamA	sense_Rv0579_121_from_start	normal	675	Rv0579
0.271868596303755	MamA	antisense_Rv0579_139_to_stop	normal	675	Rv0579
0.274326352311187	MamA	sense_Rv0579_136_to_stop	normal	675	Rv0579
0.224987926111361	MamB	antisense_vapC26_178_from_start	normal	676	vapC26
0.250323199345873	MamB	sense_Rv0584_12_from_start	normal	678	Rv0584
0.218935748679177	MamA	antisense_Rv0584_1255_to_stop	normal	679	Rv0584
0.277400618659067	MamA	sense_Rv0584_1252_to_stop	normal	679	Rv0584
0.261886227610128	MamA	antisense_Rv0584_1156_to_stop	normal	679	Rv0584
0.262428831624703	MamA	sense_Rv0584_1153_to_stop	normal	679	Rv0584
0.235064982884501	MamA	sense_Rv0585c_157_from_start	normal	682	Rv0585c
0.271634618370089	MamA	antisense_Rv0585c_154_from_start	normal	682	Rv0585c
0.244320066817995	MamB	59_up_of_mce2R	normal	683	none
0.256380574900083	MamB	antisense_mce2R_319_to_stop	normal	683	mce2R
0.439110088877993	HsdM	sense_mce2R_219_to_stop	hypervariable	683	mce2R
0.451433056810932	HsdM	antisense_mce2R_212_to_stop	hypervariable	683	mce2R
0.236616281361118	HsdM	sense_mce2R_35_to_stop	normal	683	mce2R
0.207530478400906	HsdM	antisense_mce2R_28_to_stop	normal	683	mce2R
0.30352931558443	MamA	antisense_yrbE2A_338_from_start	normal	684	yrbE2A
0.234666932773655	MamA	sense_yrbE2A_341_from_start	normal	684	yrbE2A
0.337704032156438	MamA	antisense_mce2C_322_from_start	hypervariable	688	mce2C
0.395563510294667	MamA	sense_mce2C_325_from_start	hypervariable	688	mce2C
0.245352835268839	MamA	antisense_mce2C_40_to_stop	normal	689	mce2C
0.242076183442742	MamA	sense_mce2C_37_to_stop	normal	689	mce2C
0.226530561094349	MamA	antisense_lprL_325_from_start	normal	691	lprL
0.247479350356531	MamA	sense_lprL_328_from_start	normal	691	lprL
0.240258890298764	MamB	antisense_Rv0597c_136_to_stop	normal	694	Rv0597c
0.227742733555215	MamA	sense_Rv0597c_310_to_stop	normal	694	Rv0597c
0.242468269104138	MamA	antisense_Rv0597c_313_to_stop	normal	694	Rv0597c
0.287626717622795	MamA	41_down_of_vapC27	normal	695	none
0.276403073617476	MamA	38_down_of_vapC27	normal	695	none
0.234943070661435	MamA	sense_Rv0600c_53_from_start	normal	697	Rv0600c
0.22476150091437	MamA	antisense_Rv0600c_50_from_start	normal	697	Rv0600c
0.237686973401334	MamA	sense_tcrA_313_to_stop	normal	698	tcrA
0.294103913979298	MamA	antisense_tcrA_316_to_stop	normal	698	tcrA
0.286179859960909	MamB	antisense_Rv0606_254_to_stop	normal	701	Rv0606
0.398267841159577	HsdM	8_down_of_Rv0607	hypervariable	702	none
0.425268144985531	HsdM	15_down_of_Rv0607	hypervariable	702	none
0.246849547523077	MamA	sense_Rv0610c_64_to_stop	normal	703	Rv0610c
0.236608411820025	MamA	antisense_Rv0610c_67_to_stop	normal	703	Rv0610c
0.270589026494544	MamA	sense_Rv0610c_139_to_stop	normal	703	Rv0610c
0.199341511719248	MamA	antisense_Rv0610c_142_to_stop	normal	703	Rv0610c
0.250449893003345	MamA	antisense_Rv0612_163_to_stop	normal	705	Rv0612
0.282244685802923	MamA	sense_Rv0612_160_to_stop	normal	705	Rv0612
0.244658570522323	MamA	sense_Rv0613c_1258_to_stop	normal	712	Rv0613c
0.224987544403421	MamA	antisense_Rv0613c_1261_to_stop	normal	707	Rv0613c
0.283582420568522	MamA	sense_Rv0613c_1063_from_start	normal	707	Rv0613c
0.234847171073743	MamA	antisense_Rv0613c_1060_from_start	normal	707	Rv0613c
0.271944396948057	MamA	sense_Rv0613c_433_from_start	normal	707	Rv0613c
0.239252838555795	MamA	antisense_Rv0613c_430_from_start	normal	707	Rv0613c
0.25641754973779	MamB	antisense_Rv0622_9_from_start	normal	714	Rv0622
0.227989354756051	MamA	sense_Rv0628c_238_from_start	normal	718	Rv0628c
0.233731225117453	MamA	antisense_Rv0628c_235_from_start	normal	718	Rv0628c
0.201527124165647	HsdM	antisense_recD_323_from_start	normal	720	recD
0.239763354553946	HsdM	sense_recD_316_from_start	normal	720	recD
0.261983273141565	MamB	antisense_recB_388_to_stop	normal	720	recB
0.269814712840801	HsdM	antisense_recB_936_to_stop	normal	721	recB
0.322783218111205	HsdM	sense_recB_943_to_stop	hypervariable	721	recB
0.241784195621311	MamA	sense_recB_1411_from_start	normal	727	recB
0.254487897145413	MamA	antisense_recB_1408_from_start	normal	722	recB
0.216665488812208	MamB	antisense_recB_673_from_start	normal	723	recB
0.226786263008854	MamB	antisense_recB_316_from_start	normal	723	recB
0.288970454975902	MamA	sense_Rv0633c_205_to_stop	normal	728	Rv0633c
0.210240649298846	MamA	antisense_Rv0633c_208_to_stop	normal	728	Rv0633c
0.406033307501189	MamA	sense_Rv0634c_283_from_start	hypervariable	729	Rv0634c
0.374207152478741	MamA	antisense_Rv0634c_280_from_start	hypervariable	729	Rv0634c
0.221727134163325	MamB	antisense_Rv0634c_123_from_start	normal	729	Rv0634c
0.268169301813454	MamA	antisense_rpmG2_61_to_stop	normal	730	rpmG2
0.250031326293948	MamA	sense_rpmG2_58_to_stop	normal	730	rpmG2
0.252975897400094	MamB	antisense_hadA_6_to_stop	normal	731	hadA
0.24350103173036	MamA	sense_lipG_444_from_start	normal	744	lipG
0.233487716484332	MamA	antisense_lipG_441_from_start	normal	744	lipG
0.232196137814327	MamA	sense_Rv0647c_268_to_stop	normal	740	Rv0647c
0.216967643065034	MamA	antisense_Rv0647c_271_to_stop	normal	740	Rv0647c
0.251419512951541	MamB	sense_Rv0647c_345_to_stop	normal	740	Rv0647c
0.26333595806458	MamA	antisense_Rv0648_1237_to_stop	normal	744	Rv0648
0.238013133174993	MamA	sense_Rv0648_1234_to_stop	normal	744	Rv0648
0.239634230042184	MamA	antisense_Rv0648_322_to_stop	normal	745	Rv0648
0.257719478789293	MamA	sense_Rv0648_319_to_stop	normal	745	Rv0648
0.255157439408448	MamA	antisense_Rv0648_88_to_stop	normal	745	Rv0648
0.219969494716175	MamA	sense_Rv0648_85_to_stop	normal	745	Rv0648
0.22352297285047	MamB	antisense_Rv0654_248_to_stop	normal	750	Rv0654
0.292848018222374	MamA	sense_vapB7_28_from_start	normal	755	vapB7
0.277459539079994	MamA	antisense_vapB7_25_from_start	normal	755	vapB7
0.230386191928452	MamA	antisense_atsD_1000_to_stop	normal	756	atsD
0.24510605710786	MamA	sense_atsD_997_to_stop	normal	756	atsD
0.25977535901942	MamA	antisense_atsD_416_to_stop	normal	757	atsD
0.262453240688998	MamA	sense_atsD_413_to_stop	normal	757	atsD
0.220829359953879	MamA	20_down_of_Rv0666	normal	758	none
0.225452733389557	MamA	23_down_of_Rv0666	normal	758	none
0.240456188110404	MamA	antisense_rpoB_766_from_start	normal	759	rpoB
0.235356368032575	MamA	sense_rpoB_769_from_start	normal	759	rpoB
0.259002997672886	MamA	antisense_rpoB_1390_from_start	normal	760	rpoB
0.301833137587299	MamA	sense_rpoB_1393_from_start	normal	760	rpoB
0.228813800946344	MamA	antisense_rpoB_1747_to_stop	normal	760	rpoB
0.276671041807474	MamA	sense_rpoB_1744_to_stop	normal	760	rpoB
0.193918672400699	MamB	antisense_rpoB_1075_to_stop	normal	761	rpoB
0.220069799408014	MamA	antisense_rpoB_73_to_stop	normal	762	rpoB
0.26436921774858	MamA	sense_rpoB_70_to_stop	normal	762	rpoB
0.264481320250351	MamA	antisense_rpoC_373_from_start	normal	763	rpoC
0.204587368474787	MamA	sense_rpoC_376_from_start	normal	763	rpoC
0.236965331926046	MamA	antisense_rpoC_529_from_start	normal	763	rpoC
0.243649515361688	MamA	sense_rpoC_532_from_start	normal	763	rpoC
0.245707635111396	MamA	antisense_rpoC_550_from_start	normal	763	rpoC
0.190877559877476	MamA	sense_rpoC_553_from_start	normal	763	rpoC
0.243903200046716	MamA	antisense_rpoC_666_from_start	normal	763	rpoC
0.26842218434658	MamA	sense_rpoC_669_from_start	normal	763	rpoC
0.26599504123647	MamA	antisense_rpoC_1345_from_start	normal	764	rpoC
0.225592357661409	MamA	sense_rpoC_1348_from_start	normal	764	rpoC
0.288945312142364	MamA	antisense_rpoC_1411_to_stop	normal	765	rpoC
0.215747025850803	MamA	sense_rpoC_1408_to_stop	normal	765	rpoC
0.215748271963397	HsdM	sense_rpoC_167_to_stop	normal	766	rpoC
0.214831032040959	HsdM	antisense_rpoC_160_to_stop	normal	766	rpoC
0.244128778618048	HsdM	sense_rpoC_88_to_stop	normal	766	rpoC
0.255764304498248	HsdM	antisense_rpoC_81_to_stop	normal	766	rpoC
0.232010537144542	MamB	antisense_Rv0669c_587_to_stop	normal	767	Rv0669c
0.24757075245434	MamB	sense_Rv0669c_868_from_start	normal	768	Rv0669c
0.26495398017227	MamA	antisense_end_176_to_stop	normal	769	end
0.211113241095939	MamA	sense_end_173_to_stop	normal	769	end
0.217637585837851	HsdM	sense_fadE8_273_from_start	normal	771	fadE8
0.259522497329813	HsdM	antisense_fadE8_280_from_start	normal	771	fadE8
0.38870552427197	MamA	antisense_fadE8_448_to_stop	hypervariable	777	fadE8
0.267995097226037	MamA	sense_fadE8_445_to_stop	normal	777	fadE8
0.267320667874413	MamA	antisense_echA4_130_from_start	normal	772	echA4
0.235994038894152	MamA	sense_echA4_133_from_start	normal	772	echA4
0.221836493356695	MamB	antisense_echA4_438_from_start	normal	772	echA4
0.571717815027442	HsdM	sense_Rv0674_298_from_start	hypervariable	773	Rv0674
0.530243290887724	HsdM	antisense_Rv0674_305_from_start	hypervariable	773	Rv0674
0.234169374625679	MamA	antisense_Rv0674_13_to_stop	normal	774	Rv0674
0.312723902998733	MamA	sense_Rv0674_10_to_stop	normal	774	Rv0674
0.255241465563193	MamA	sense_mmpL5_1324_to_stop	normal	776	mmpL5
0.248176595890822	MamA	antisense_mmpL5_1327_to_stop	normal	776	mmpL5
0.275556493766608	MamA	sense_mmpL5_286_from_start	normal	777	mmpL5
0.25739828533084	MamA	antisense_mmpL5_283_from_start	normal	777	mmpL5
0.272839199106017	MamB	sense_rpsL_32_to_stop	normal	781	rpsL
0.229717318508342	MamA	antisense_rpsG_217_from_start	normal	781	rpsG
0.230617676493903	MamA	sense_rpsG_220_from_start	normal	781	rpsG
0.211994208535123	MamA	antisense_fusA1_898_to_stop	normal	783	fusA1
0.228757021487121	MamA	sense_fusA1_895_to_stop	normal	783	fusA1
0.220822682394986	HsdM	sense_tuf_186_from_start	normal	784	tuf
0.250704678071177	HsdM	antisense_tuf_193_from_start	normal	784	tuf
0.272417598285724	MamB	sense_Rv0686_373_to_stop	normal	785	Rv0686
0.265003547609842	MamA	antisense_Rv0688_227_to_stop	normal	788	Rv0688
0.342315675869156	MamA	sense_Rv0688_224_to_stop	hypervariable	788	Rv0688
0.217607981692719	MamB	230_down_of_Rv0690c	normal	789	none
0.258292762403788	MamB	antisense_Rv0690c_328_from_start	normal	790	Rv0690c
0.206713820639283	HsdM	sense_Rv0695_139_from_start	normal	794	Rv0695
0.205226943286505	HsdM	antisense_Rv0695_146_from_start	normal	794	Rv0695
0.377402553469654	MamA	antisense_Rv0697_367_from_start	hypervariable	796	Rv0697
0.313403205112142	MamA	sense_Rv0697_370_from_start	normal	796	Rv0697
0.380655621238946	HsdM	sense_Rv0698_255_to_stop	hypervariable	798	Rv0698
0.416739057656473	HsdM	antisense_Rv0698_248_to_stop	hypervariable	798	Rv0698
0.266610289461179	MamB	antisense_rplD_88_to_stop	normal	801	rplD
0.206962291393454	MamA	antisense_rplF_229_to_stop	normal	813	rplF
0.192770173355175	MamA	sense_rplF_226_to_stop	normal	813	rplF
0.240613942311099	MamB	antisense_sppA_165_from_start	normal	815	sppA
0.278250427532834	MamA	sense_Rv0725c_39_from_start	normal	817	Rv0725c
0.27111280986201	MamA	antisense_Rv0725c_36_from_start	normal	817	Rv0725c
0.204445317259474	MamB	antisense_serA2_229_to_stop	normal	820	serA2
0.23636613377289	MamA	sense_serA2_464_to_stop	normal	820	serA2
0.23927558151638	MamA	antisense_serA2_467_to_stop	normal	820	serA2
0.215696422308149	MamA	antisense_xylB_136_from_start	normal	821	xylB
0.221202688741222	MamA	sense_xylB_139_from_start	normal	821	xylB
0.194660226295768	MamA	antisense_Rv0730_340_from_start	normal	822	Rv0730
0.246358479941216	MamA	sense_Rv0730_343_from_start	normal	822	Rv0730
0.223331866231248	MamA	antisense_secY_142_to_stop	normal	825	secY
0.241525331508736	MamA	sense_secY_139_to_stop	normal	825	secY
0.264360146101743	MamA	antisense_adk_214_to_stop	normal	825	adk
0.225878104191545	MamA	sense_adk_211_to_stop	normal	825	adk
0.281964000029349	MamA	antisense_adk_91_to_stop	normal	826	adk
0.251190893167931	MamA	sense_adk_88_to_stop	normal	826	adk
0.232785295575055	MamB	sense_rslA_277_to_stop	normal	828	rslA
0.211186696036945	MamA	antisense_Rv0737_211_to_stop	normal	828	Rv0737
0.223082815290935	MamA	sense_Rv0737_208_to_stop	normal	828	Rv0737
0.258293915669199	MamA	26_up_of_Rv0740	normal	831	none
0.255412765428828	MamA	23_up_of_Rv0740	normal	831	none
0.212815049975581	MamA	antisense_Rv0740_175_from_start	normal	831	Rv0740
0.246724282387833	MamA	sense_Rv0740_178_from_start	normal	831	Rv0740
0.263666110669694	MamA	183_down_of_Rv0743c	normal	833	none
0.287703629011596	MamA	180_down_of_Rv0743c	normal	833	none
0.227205007938638	MamA	sense_Rv0749A_52_from_start	normal	847	Rv0749A
0.220306490515284	MamA	antisense_Rv0749A_49_from_start	normal	847	Rv0749A
0.365428232610205	MamA	sense_fadE9_109_to_stop	hypervariable	842	fadE9
0.384229898776172	MamA	antisense_fadE9_112_to_stop	hypervariable	842	fadE9
0.241954065415535	MamA	sense_mmsA_418_to_stop	normal	850	mmsA
0.259480046377928	MamA	antisense_mmsA_421_to_stop	normal	850	mmsA
0.234899874666602	MamA	antisense_PE_PGRS11_419_to_stop	normal	846	PE_PGRS11
0.25698888377227	MamA	sense_PE_PGRS11_416_to_stop	normal	846	PE_PGRS11
0.235352751451104	MamA	antisense_phoR_424_to_stop	normal	852	phoR
0.253413095653206	MamA	sense_phoR_421_to_stop	normal	852	phoR
0.279347511085978	MamA	sense_adhB_82_to_stop	normal	859	adhB
0.246516095330017	MamA	antisense_adhB_85_to_stop	normal	859	adhB
0.268096450477973	MamB	antisense_adhB_281_to_stop	normal	859	adhB
0.178097665251546	MamA	sense_Rv0763c_61_from_start	normal	861	Rv0763c
0.286413823174266	MamA	antisense_Rv0763c_58_from_start	normal	861	Rv0763c
0.33985299622024	HsdM	antisense_Rv0767c_153_to_stop	hypervariable	864	Rv0767c
0.378268994101851	HsdM	sense_Rv0767c_160_to_stop	hypervariable	864	Rv0767c
0.322938296047886	MamA	antisense_aldA_642_from_start	hypervariable	866	aldA
0.240740403674722	MamA	sense_aldA_645_from_start	normal	866	aldA
0.230210858339355	HsdM	33_up_of_Rv0770	normal	867	none
0.252250420403148	HsdM	26_up_of_Rv0770	normal	867	none
0.228528452122683	MamB	antisense_Rv0771_178_to_stop	normal	863	Rv0771
0.24494436194768	MamA	antisense_purD_547_from_start	normal	869	purD
0.257404871243084	MamA	sense_purD_550_from_start	normal	869	purD
0.227202699704067	MamA	antisense_purD_373_to_stop	normal	864	purD
0.259536753118582	MamA	sense_purD_370_to_stop	normal	864	purD
0.218764262688187	MamA	sense_Rv0774c_53_to_stop	normal	866	Rv0774c
0.218632585571206	MamA	antisense_Rv0774c_56_to_stop	normal	866	Rv0774c
0.246101053268724	HsdM	sense_Rv0775_137_to_stop	normal	874	Rv0775
0.245801940746563	HsdM	antisense_Rv0775_130_to_stop	normal	874	Rv0775
0.265493324412892	MamB	antisense_purB_547_from_start	normal	869	purB
0.186789981675052	HsdM	sense_cyp126_109_from_start	normal	870	cyp126
0.248839209727782	HsdM	antisense_cyp126_116_from_start	normal	870	cyp126
0.266343688015177	MamA	antisense_purC_277_from_start	normal	878	purC
0.275532464404328	MamA	sense_purC_280_from_start	normal	878	purC
0.244410982452101	MamB	antisense_purC_379_to_stop	normal	878	purC
0.178798413267056	MamA	127_down_of_Rv0781	normal	875	none
0.272947884066541	MamA	130_down_of_Rv0781	normal	875	none
0.270682915611023	MamA	sense_emrB_649_to_stop	normal	876	emrB
0.283493245552206	MamA	antisense_emrB_652_to_stop	normal	876	emrB
0.21791712494025	MamB	antisense_Rv0785_523_from_start	normal	885	Rv0785
0.475063927762384	MamA	antisense_Rv0785_619_from_start	hypervariable	884	Rv0785
0.402873017645289	MamA	sense_Rv0785_622_from_start	hypervariable	884	Rv0785
0.268557947975377	HsdM	sense_Rv0787_45_from_start	normal	880	Rv0787
0.211314631873844	HsdM	antisense_Rv0787_52_from_start	normal	880	Rv0787
0.208465302859378	HsdM	sense_Rv0787_180_from_start	normal	886	Rv0787
0.196380761729071	HsdM	antisense_Rv0787_187_from_start	normal	886	Rv0787
0.348763868631231	MamA	antisense_Rv0787A_106_to_stop	hypervariable	887	Rv0787A
0.292785703976416	MamA	sense_Rv0787A_103_to_stop	normal	887	Rv0787A
0.213133522150739	MamB	antisense_Rv0794c_133_from_start	normal	887	Rv0794c
0.37539878852645	MamB	sense_pepC_208_from_start	hypervariable	897	pepC
0.287560963988125	MamA	sense_Rv0802c_241_to_stop	normal	899	Rv0802c
0.285160104923794	MamA	antisense_Rv0802c_244_to_stop	normal	899	Rv0802c
0.178340681238934	MamA	sense_Rv0802c_106_from_start	normal	899	Rv0802c
0.240133349233321	MamA	antisense_Rv0802c_103_from_start	normal	899	Rv0802c
0.206245996454134	MamA	sense_Rv0802c_52_from_start	normal	899	Rv0802c
0.249176602942199	MamA	antisense_Rv0802c_49_from_start	normal	899	Rv0802c
0.196405724960274	MamB	sense_purL_676_to_stop	normal	901	purL
0.207071976997884	MamB	antisense_purL_43_to_stop	normal	902	purL
0.23600272299887	MamA	antisense_Rv0804_45_from_start	normal	902	Rv0804
0.20575495329995	MamA	sense_Rv0804_48_from_start	normal	902	Rv0804
0.244396795484948	MamA	sense_cpsY_103_to_stop	normal	904	cpsY
0.196877842966549	MamA	antisense_cpsY_106_to_stop	normal	904	cpsY
0.217588398214112	MamA	antisense_purF_247_to_stop	normal	907	purF
0.266308292369621	MamA	sense_purF_244_to_stop	normal	907	purF
0.293906313724815	MamA	antisense_purM_216_from_start	normal	904	purM
0.242012186861051	MamA	sense_purM_219_from_start	normal	904	purM
0.227859570687651	MamA	antisense_purM_460_to_stop	normal	908	purM
0.244227138850332	MamA	sense_purM_457_to_stop	normal	908	purM
0.198561299728421	MamA	sense_Rv0817c_355_from_start	normal	914	Rv0817c
0.228683145940708	MamA	antisense_Rv0817c_352_from_start	normal	914	Rv0817c
0.272529839493966	MamA	sense_Rv0817c_274_from_start	normal	914	Rv0817c
0.293673046771264	MamA	antisense_Rv0817c_271_from_start	normal	914	Rv0817c
0.222037927336918	MamA	9_up_of_Rv0818	normal	911	none
0.215645356986855	MamA	6_up_of_Rv0818	normal	911	none
0.237793492045335	HsdM	sense_Rv0818_34_from_start	normal	911	Rv0818
0.254410863976879	HsdM	antisense_Rv0818_41_from_start	normal	911	Rv0818
0.205273919087954	MamA	antisense_Rv0818_112_from_start	normal	911	Rv0818
0.33844548471123	MamA	sense_Rv0818_115_from_start	hypervariable	911	Rv0818
0.244534835729777	HsdM	sense_Rv0818_210_from_start	normal	911	Rv0818
0.250376106409868	HsdM	antisense_Rv0818_217_from_start	normal	911	Rv0818
0.208444072003934	MamB	antisense_Rv0818_340_to_stop	normal	915	Rv0818
0.261917247637397	MamB	antisense_mshD_418_from_start	normal	912	mshD
0.219154711698409	MamA	sense_Rv0822c_65_to_stop	normal	918	Rv0822c
0.285164064760709	MamA	antisense_Rv0822c_68_to_stop	normal	918	Rv0822c
0.262720621899975	MamA	sense_Rv0822c_913_to_stop	normal	915	Rv0822c
0.235457637903945	MamA	antisense_Rv0822c_916_to_stop	normal	915	Rv0822c
0.218826336734303	HsdM	antisense_Rv0822c_82_from_start	normal	916	Rv0822c
0.23010970118725	HsdM	sense_Rv0822c_75_from_start	normal	920	Rv0822c
0.246291013915132	MamB	49_up_of_Rv0822c	normal	920	none
0.327166515500476	MamA	6_up_of_desA1	hypervariable	922	none
0.319663878233592	MamA	9_up_of_desA1	hypervariable	922	none
0.286533926525267	MamA	antisense_Rv0826_403_to_stop	normal	920	Rv0826
0.247344404029293	MamA	sense_Rv0826_400_to_stop	normal	920	Rv0826
0.270964153072739	MamA	sense_kmtR_139_to_stop	normal	921	kmtR
0.2455780026428	MamA	antisense_kmtR_142_to_stop	normal	921	kmtR
0.245533730078947	HsdM	antisense_Rv0828c_171_from_start	normal	920	Rv0828c
0.209357541741183	HsdM	sense_Rv0828c_164_from_start	normal	920	Rv0828c
0.222929214024581	MamA	antisense_Rv0830_374_to_stop	normal	921	Rv0830
0.198692317979345	MamA	sense_Rv0830_371_to_stop	normal	921	Rv0830
0.247610153615373	MamB	sense_Rv0830_94_to_stop	normal	923	Rv0830
0.218173797766773	MamA	sense_Rv0831c_406_from_start	normal	927	Rv0831c
0.262365067989406	MamA	antisense_Rv0831c_403_from_start	normal	927	Rv0831c
0.211882584237257	MamA	sense_PE_PGRS14_819_to_stop	normal	927	PE_PGRS14
0.237511274573877	MamA	antisense_PE_PGRS14_822_to_stop	normal	927	PE_PGRS14
0.250678697276015	MamA	sense_PE_PGRS14_416_from_start	normal	934	PE_PGRS14
0.202307223494385	MamA	antisense_PE_PGRS14_413_from_start	normal	934	PE_PGRS14
0.229531360884513	HsdM	sense_lpqQ_87_to_stop	normal	935	lpqQ
0.236729758064515	HsdM	antisense_lpqQ_80_to_stop	normal	935	lpqQ
0.264185206573237	MamB	antisense_Rv0837c_493_from_start	normal	937	Rv0837c
0.244351700210335	MamA	119_down_of_Rv0841	normal	937	none
0.23118705247968	MamA	122_down_of_Rv0841	normal	937	none
0.230193324947407	MamA	antisense_Rv0843_46_from_start	normal	943	Rv0843
0.264557113683692	MamA	sense_Rv0843_49_from_start	normal	943	Rv0843
0.236031266149431	MamB	antisense_Rv0843_444_from_start	normal	938	Rv0843
0.224361854377256	MamA	sense_narL_142_from_start	normal	940	narL
0.283827396204474	MamA	antisense_narL_139_from_start	normal	940	narL
0.511722931029722	HsdM	sense_Rv0845_332_to_stop	hypervariable	945	Rv0845
0.568581976823602	HsdM	antisense_Rv0845_325_to_stop	hypervariable	945	Rv0845
0.240117289244588	MamB	antisense_Rv0845_26_to_stop	normal	946	Rv0845
0.250808365094725	MamA	antisense_cysK2_550_from_start	normal	949	cysK2
0.255938221603306	MamA	sense_cysK2_553_from_start	normal	949	cysK2
0.235096459255581	MamA	antisense_cysK2_260_to_stop	normal	944	cysK2
0.277269070650468	MamA	sense_cysK2_257_to_stop	normal	944	cysK2
0.265948764018289	MamB	sense_cysK2_38_to_stop	normal	950	cysK2
0.248852839356004	MamB	antisense_Rv0851c_148_from_start	normal	952	Rv0851c
0.204466227952699	HsdM	sense_Rv0852_369_from_start	normal	947	Rv0852
0.197645475827642	HsdM	antisense_Rv0852_376_from_start	normal	948	Rv0852
0.264899707486105	MamB	antisense_pdc_220_from_start	normal	949	pdc
0.232875282073778	MamA	antisense_far_217_from_start	normal	950	far
0.28588121202839	MamA	sense_far_220_from_start	normal	950	far
0.197702453732809	MamA	antisense_Rv0857_220_from_start	normal	957	Rv0857
0.188139462041696	MamA	sense_Rv0857_223_from_start	normal	957	Rv0857
0.192868702019022	MamA	antisense_Rv0859_286_from_start	normal	959	Rv0859
0.175359092490648	MamA	sense_Rv0859_289_from_start	normal	959	Rv0859
0.207491332938679	MamA	antisense_Rv0859_85_to_stop	normal	960	Rv0859
0.259744737335348	MamA	sense_Rv0859_82_to_stop	normal	960	Rv0859
0.274576162813183	MamA	antisense_fadB_352_from_start	normal	960	fadB
0.240913393919138	MamA	sense_fadB_355_from_start	normal	960	fadB
0.276960560809811	MamA	antisense_fadB_1051_to_stop	normal	961	fadB
0.247761723688966	MamA	sense_fadB_1048_to_stop	normal	961	fadB
0.344076813043705	MamA	antisense_fadB_1036_to_stop	hypervariable	961	fadB
0.30938564345457	MamA	sense_fadB_1033_to_stop	normal	961	fadB
0.243745709222873	HsdM	antisense_ercc3_390_to_stop	normal	957	ercc3
0.283870535630001	HsdM	sense_ercc3_397_to_stop	normal	957	ercc3
0.241104393585572	HsdM	antisense_ercc3_801_to_stop	normal	963	ercc3
0.236437745291802	HsdM	sense_ercc3_808_to_stop	normal	963	ercc3
0.232521851581106	MamB	antisense_Rv0862c_55_to_stop	normal	964	Rv0862c
0.26924046719091	MamB	antisense_Rv0862c_259_to_stop	normal	964	Rv0862c
0.188550985963458	MamA	antisense_mog_87_to_stop	normal	962	mog
0.27536693347061	MamA	sense_mog_84_to_stop	normal	962	mog
0.299721514612996	HsdM	antisense_moaD2_25_to_stop	normal	965	moaD2
0.219966262801005	HsdM	sense_moaD2_32_to_stop	normal	965	moaD2
0.224240352342939	MamA	6_up_of_Rv0870c	normal	966	none
0.279604651646406	MamA	9_up_of_Rv0870c	normal	966	none
0.212353888346449	MamB	sense_PE_PGRS15_328_from_start	normal	968	PE_PGRS15
0.234536341283884	MamB	sense_PE_PGRS15_202_from_start	normal	969	PE_PGRS15
0.237002517272398	MamA	72_up_of_PE_PGRS15	normal	974	none
0.261388957689301	MamA	75_up_of_PE_PGRS15	normal	974	none
0.276662410538557	HsdM	sense_fadE10_411_from_start	normal	969	fadE10
0.288485446961554	HsdM	antisense_fadE10_418_from_start	normal	970	fadE10
0.202286623451456	MamB	antisense_fadE10_754_from_start	normal	975	fadE10
0.232210576705973	MamA	antisense_fadE10_391_to_stop	normal	971	fadE10
0.242230815337728	MamA	sense_fadE10_388_to_stop	normal	971	fadE10
0.186057152619625	MamA	antisense_fadE10_154_to_stop	normal	976	fadE10
0.262627223135414	MamA	sense_fadE10_151_to_stop	normal	976	fadE10
0.228782241499375	MamA	antisense_fadE10_133_to_stop	normal	976	fadE10
0.263785850829585	MamA	sense_fadE10_130_to_stop	normal	976	fadE10
0.247834955984126	MamA	sense_Rv0874c_201_to_stop	normal	971	Rv0874c
0.264883330639548	MamA	antisense_Rv0874c_204_to_stop	normal	971	Rv0874c
0.242364403965265	MamB	antisense_Rv0874c_487_to_stop	normal	972	Rv0874c
0.205509320830676	MamB	antisense_fprB_135_from_start	normal	982	fprB
0.208778978790914	MamA	antisense_fprB_679_to_stop	normal	983	fprB
0.290330727903763	MamA	sense_fprB_676_to_stop	normal	983	fprB
0.235001659726384	MamB	antisense_fprB_43_to_stop	normal	989	fprB
0.241861175753476	MamA	sense_Rv0890c_1068_from_start	normal	995	Rv0890c
0.225901194523081	MamA	antisense_Rv0890c_1065_from_start	normal	995	Rv0890c
0.230606617667414	MamB	sense_Rv0891c_210_from_start	normal	997	Rv0891c
0.211039461426127	MamA	141_up_of_Rv0892	normal	992	none
0.239268603440535	MamA	138_up_of_Rv0892	normal	992	none
0.346849377465714	MamA	18_up_of_Rv0893c	hypervariable	1000	none
0.324851025837088	MamA	21_up_of_Rv0893c	hypervariable	1000	none
0.323276078644646	MamA	antisense_gltA2_472_to_stop	hypervariable	1004	gltA2
0.279870289578563	MamA	sense_gltA2_469_to_stop	normal	1004	gltA2
0.240680236273456	HsdM	sense_arfA_176_to_stop	normal	1007	arfA
0.234358933351767	HsdM	antisense_arfA_169_to_stop	normal	1007	arfA
0.223949455763246	MamA	sense_prrB_55_to_stop	normal	1008	prrB
0.259462670890632	MamA	antisense_prrB_58_to_stop	normal	1008	prrB
0.247465294579646	MamA	sense_prrB_478_to_stop	normal	1004	prrB
0.30097859457873	MamA	antisense_prrB_481_to_stop	normal	1004	prrB
0.259387162190312	MamA	sense_prrB_580_to_stop	normal	1009	prrB
0.198037710807413	MamA	antisense_prrB_583_to_stop	normal	1009	prrB
0.179952466381693	MamA	sense_prrA_67_to_stop	normal	1004	prrA
0.224448051282714	MamA	antisense_prrA_70_to_stop	normal	1004	prrA
0.228999017309755	MamA	sense_prrA_274_to_stop	normal	1010	prrA
0.229748347749778	MamA	antisense_prrA_277_to_stop	normal	1010	prrA
0.329300362166745	MamA	antisense_echA6_335_to_stop	hypervariable	1012	echA6
0.358302675547398	MamA	sense_echA6_332_to_stop	hypervariable	1012	echA6
0.208705983215251	MamB	antisense_Rv0906_446_to_stop	normal	1013	Rv0906
0.409373848599337	MamA	antisense_ctpE_1075_to_stop	hypervariable	1012	ctpE
0.38902270055461	MamA	sense_ctpE_1072_to_stop	hypervariable	1012	ctpE
0.209293362078024	HsdM	sense_Rv0911_300_from_start	normal	1014	Rv0911
0.20583808888747	HsdM	antisense_Rv0911_307_from_start	normal	1014	Rv0911
0.222254679121783	MamA	antisense_Rv0912_139_from_start	normal	1020	Rv0912
0.25412185208688	MamA	sense_Rv0912_142_from_start	normal	1020	Rv0912
0.210025578619934	MamB	sense_Rv0913c_30_to_stop	normal	1021	Rv0913c
0.256131621488153	MamA	sense_Rv0914c_367_from_start	normal	1023	Rv0914c
0.294106862817807	MamA	antisense_Rv0914c_364_from_start	normal	1023	Rv0914c
0.218622180633117	MamA	sense_PPE14_203_to_stop	normal	1024	PPE14
0.235110147822033	MamA	antisense_PPE14_206_to_stop	normal	1024	PPE14
0.218091809212451	MamB	sense_PPE14_297_to_stop	normal	1024	PPE14
0.192912989182471	HsdM	sense_betP_330_from_start	normal	1026	betP
0.212373463279047	HsdM	antisense_betP_337_from_start	normal	1026	betP
0.312620457489824	MamA	antisense_betP_559_from_start	normal	1026	betP
0.251976732180772	MamA	sense_betP_562_from_start	normal	1026	betP
0.229866751517135	MamA	135_down_of_betP	normal	1023	none
0.198435042621253	MamA	138_down_of_betP	normal	1023	none
0.212174634781307	HsdM	sense_Rv0918_162_from_start	normal	1028	Rv0918
0.242236837664095	HsdM	antisense_Rv0918_169_from_start	normal	1028	Rv0918
0.24740851344644	MamB	antisense_Rv0919_184_to_stop	normal	1024	Rv0919
0.259433696116082	MamA	sense_Rv0920c_562_from_start	normal	1030	Rv0920c
0.256823344454096	MamA	antisense_Rv0920c_559_from_start	normal	1030	Rv0920c
0.20126020954454	MamA	sense_Rv0923c_490_to_stop	normal	1029	Rv0923c
0.245154288243587	MamA	antisense_Rv0923c_493_to_stop	normal	1029	Rv0923c
0.264562856126292	MamA	sense_mntH_275_to_stop	normal	1029	mntH
0.233814136228914	MamA	antisense_mntH_278_to_stop	normal	1029	mntH
0.253539004438671	MamB	antisense_Rv0925c_52_from_start	normal	1036	Rv0925c
0.225277308148518	MamB	antisense_Rv0927c_175_to_stop	normal	1033	Rv0927c
0.33285068465222	MamA	sense_Rv0927c_199_to_stop	hypervariable	1033	Rv0927c
0.194621595766012	MamA	antisense_Rv0927c_202_to_stop	normal	1033	Rv0927c
0.241473128968758	MamA	sense_pknD_907_to_stop	normal	1037	pknD
0.263477484030972	MamA	antisense_pknD_910_to_stop	normal	1037	pknD
0.242155040452171	MamA	sense_pstS2_153_from_start	normal	1039	pstS2
0.197011621112466	MamA	antisense_pstS2_150_from_start	normal	1039	pstS2
0.237899082276964	MamA	antisense_pstB_289_from_start	normal	1045	pstB
0.203828704342497	MamA	sense_pstB_292_from_start	normal	1045	pstB
0.250935655038286	MamB	antisense_pstS1_395_to_stop	normal	1041	pstS1
0.2122740538396	MamA	antisense_pstA2_192_from_start	normal	1048	pstA2
0.255269416816723	MamA	sense_pstA2_195_from_start	normal	1048	pstA2
0.235111645676929	MamA	sense_mku_55_to_stop	normal	1049	mku
0.309512942889982	MamA	antisense_mku_58_to_stop	normal	1049	mku
0.263987595132574	MamA	antisense_ligD_322_from_start	normal	1050	ligD
0.289907728862113	MamA	sense_ligD_325_from_start	normal	1050	ligD
0.332709854278198	MamA	antisense_ligD_681_from_start	hypervariable	1045	ligD
0.284907134195815	MamA	sense_ligD_684_from_start	normal	1045	ligD
0.294624767601857	MamA	antisense_Rv0939_520_from_start	normal	1048	Rv0939
0.208434686624622	MamA	sense_Rv0939_523_from_start	normal	1048	Rv0939
0.229033094510601	MamA	antisense_Rv0939_604_from_start	normal	1048	Rv0939
0.227360119404076	MamA	sense_Rv0939_607_from_start	normal	1048	Rv0939
0.230910645621226	MamA	antisense_Rv0939_699_from_start	normal	1053	Rv0939
0.232730458410686	MamA	sense_Rv0939_702_from_start	normal	1053	Rv0939
0.273903146878798	MamA	antisense_Rv0939_859_from_start	normal	1053	Rv0939
0.232977688796743	MamA	sense_Rv0939_862_from_start	normal	1053	Rv0939
0.236394899155532	MamB	antisense_Rv0939_571_to_stop	normal	1048	Rv0939
0.405936680214425	MamA	sense_Rv0940c_34_to_stop	hypervariable	1054	Rv0940c
0.450527131381799	MamA	antisense_Rv0940c_37_to_stop	hypervariable	1049	Rv0940c
0.23245401486638	MamA	sense_Rv0941c_105_from_start	normal	1056	Rv0941c
0.246420604997273	MamA	antisense_Rv0941c_102_from_start	normal	1056	Rv0941c
0.25236138747069	MamA	antisense_Rv0942_43_to_stop	normal	1056	Rv0942
0.208953419777374	MamA	sense_Rv0942_40_to_stop	normal	1056	Rv0942
0.414737656739443	MamA	antisense_Rv0945_202_to_stop	hypervariable	1053	Rv0945
0.361243787780964	MamA	sense_Rv0945_199_to_stop	hypervariable	1053	Rv0945
0.390762953161545	MamA	sense_pgi_649_from_start	hypervariable	1055	pgi
0.35807233017437	MamA	antisense_pgi_646_from_start	hypervariable	1055	pgi
0.247488430976726	MamA	29_up_of_Rv0947c	normal	1061	none
0.249287604486867	MamA	32_up_of_Rv0947c	normal	1061	none
0.284627940835321	MamB	antisense_uvrD1_318_from_start	normal	1062	uvrD1
0.249053312477995	MamA	sense_Rv0950c_191_from_start	normal	1065	Rv0950c
0.305731700343661	MamA	antisense_Rv0950c_188_from_start	normal	1065	Rv0950c
0.213341438597522	MamA	antisense_sucC_466_to_stop	normal	1061	sucC
0.233274574018088	MamA	sense_sucC_463_to_stop	normal	1061	sucC
0.193837357001408	MamA	antisense_sucD_79_to_stop	normal	1063	sucD
0.187096802505821	MamA	sense_sucD_76_to_stop	normal	1063	sucD
0.265576544963877	MamA	antisense_Rv0954_66_to_stop	normal	1065	Rv0954
0.237970462313935	MamA	sense_Rv0954_63_to_stop	normal	1065	Rv0954
0.254295752845096	MamB	antisense_Rv0958_37_from_start	normal	1068	Rv0958
0.196999159824555	MamA	antisense_Rv0958_619_to_stop	normal	1069	Rv0958
0.233768031931452	MamA	sense_Rv0958_616_to_stop	normal	1069	Rv0958
0.290876212559188	MamA	antisense_Rv0958_613_to_stop	normal	1069	Rv0958
0.245758581552024	MamA	sense_Rv0958_610_to_stop	normal	1069	Rv0958
0.235395732149036	MamA	antisense_Rv0959_982_from_start	normal	1076	Rv0959
0.244313050050309	MamA	sense_Rv0959_985_from_start	normal	1076	Rv0959
0.198035549808432	MamB	sense_Rv0959_315_to_stop	normal	1072	Rv0959
0.261799852456003	MamA	antisense_Rv0959_262_to_stop	normal	1072	Rv0959
0.263751680332134	MamA	sense_Rv0959_259_to_stop	normal	1072	Rv0959
0.268186913906529	MamA	antisense_csoR_88_from_start	normal	1081	csoR
0.200779833806785	MamA	sense_csoR_91_from_start	normal	1081	csoR
0.235979804493333	MamB	antisense_csoR_105_from_start	normal	1082	csoR
0.241015466271835	MamA	antisense_csoR_148_from_start	normal	1082	csoR
0.245175725551367	MamA	sense_csoR_151_from_start	normal	1082	csoR
0.234141176106843	MamA	antisense_ctpV_835_from_start	normal	1083	ctpV
0.248646304992478	MamA	sense_ctpV_838_from_start	normal	1083	ctpV
0.200385442716813	MamA	antisense_ctpV_194_to_stop	normal	1079	ctpV
0.254322317718612	MamA	sense_ctpV_191_to_stop	normal	1079	ctpV
0.222879003550039	HsdM	sense_Rv0970_277_from_start	normal	1085	Rv0970
0.255879232557945	HsdM	antisense_Rv0970_284_from_start	normal	1085	Rv0970
0.339508265871988	MamA	sense_accA2_151_to_stop	hypervariable	1082	accA2
0.415074575193653	MamA	antisense_accA2_154_to_stop	hypervariable	1082	accA2
0.428291968320294	MamA	sense_accA2_847_from_start	hypervariable	1083	accA2
0.261226770123791	MamA	antisense_accA2_844_from_start	normal	1083	accA2
0.267626424348103	MamA	sense_accD2_208_from_start	normal	1091	accD2
0.299539676528054	MamA	antisense_accD2_205_from_start	normal	1091	accD2
0.277027397312178	HsdM	sense_PE_PGRS16_835_from_start	normal	1090	PE_PGRS16
0.256569396823462	HsdM	antisense_PE_PGRS16_842_from_start	normal	1090	PE_PGRS16
0.286838882947752	MamA	antisense_PE_PGRS16_327_to_stop	normal	1091	PE_PGRS16
0.280485832742029	MamA	sense_PE_PGRS16_324_to_stop	normal	1091	PE_PGRS16
0.250438902097901	MamB	sense_Rv0979c_16_from_start	normal	1093	Rv0979c
0.251817885652263	MamA	antisense_mprA_205_to_stop	normal	1096	mprA
0.23192195570449	MamA	sense_mprA_202_to_stop	normal	1096	mprA
0.227224504716894	MamB	antisense_mprB_664_to_stop	normal	1102	mprB
0.206825461866263	MamA	antisense_mprB_532_to_stop	normal	1102	mprB
0.25770269524689	MamA	sense_mprB_529_to_stop	normal	1102	mprB
0.247869540194177	MamA	antisense_pepD_177_to_stop	normal	1099	pepD
0.201917500767823	MamA	sense_pepD_174_to_stop	normal	1099	pepD
0.236879206570528	MamB	antisense_grcC2_12_to_stop	normal	1110	grcC2
0.243924096347981	MamB	antisense_grcC2_208_to_stop	normal	1105	grcC2
0.222386720856806	MamB	antisense_grcC2_238_to_stop	normal	1105	grcC2
0.239933751796885	MamA	sense_Rv0992c_109_from_start	normal	1114	Rv0992c
0.219118689707834	MamA	antisense_Rv0992c_106_from_start	normal	1114	Rv0992c
0.252535790713831	MamA	antisense_galU_235_from_start	normal	1113	galU
0.266129925413106	MamA	sense_galU_238_from_start	normal	1113	galU
0.300004660976696	MamA	antisense_galU_442_from_start	normal	1108	galU
0.246960962569886	MamA	sense_galU_445_from_start	normal	1108	galU
0.282798780941545	MamB	antisense_moeA1_193_to_stop	normal	1115	moeA1
0.25191747283584	MamA	antisense_Rv0996_103_to_stop	normal	1117	Rv0996
0.303156438696854	MamA	sense_Rv0996_100_to_stop	normal	1117	Rv0996
0.216284836714205	MamA	antisense_Rv0996_67_to_stop	normal	1117	Rv0996
0.280403257826982	MamA	sense_Rv0996_64_to_stop	normal	1117	Rv0996
0.258040160669381	MamB	sense_Rv1005c_45_from_start	normal	1127	Rv1005c
0.241353869247517	MamA	sense_metS_325_to_stop	normal	1124	metS
0.246992544244176	MamA	antisense_metS_328_to_stop	normal	1124	metS
0.22477606430994	MamA	antisense_tatD_121_from_start	normal	1126	tatD
0.207428410478619	MamA	sense_tatD_124_from_start	normal	1126	tatD
0.270523673544891	HsdM	antisense_pth_166_to_stop	normal	1137	pth
0.316205729648004	HsdM	sense_pth_173_to_stop	hypervariable	1137	pth
0.255046934089121	MamA	sense_pth_41_from_start	normal	1132	pth
0.191687198084712	MamA	antisense_pth_38_from_start	normal	1132	pth
0.267706970295235	MamA	sense_rplY_82_to_stop	normal	1139	rplY
0.221014553733615	MamA	antisense_rplY_85_to_stop	normal	1139	rplY
0.209764957156886	MamA	sense_rplY_136_from_start	normal	1138	rplY
0.212223483451607	MamA	antisense_rplY_133_from_start	normal	1138	rplY
0.216771222716533	MamA	sense_glmU_311_to_stop	normal	1135	glmU
0.264772556034245	MamA	antisense_glmU_314_to_stop	normal	1135	glmU
0.238298064378121	MamA	antisense_Rv1019_201_to_stop	normal	1137	Rv1019
0.259695144472193	MamA	sense_Rv1019_198_to_stop	normal	1137	Rv1019
0.237838543070172	MamA	antisense_Rv1019_31_to_stop	normal	1137	Rv1019
0.231531203793068	MamA	sense_Rv1019_28_to_stop	normal	1137	Rv1019
0.188439663229282	MamB	antisense_mfd_235_from_start	normal	1138	mfd
0.263506233940379	MamA	antisense_mfd_1405_from_start	normal	1144	mfd
0.245366540921688	MamA	sense_mfd_1408_from_start	normal	1144	mfd
0.269490542197616	MamB	antisense_mfd_1417_from_start	normal	1144	mfd
0.24198258429313	MamA	antisense_mfd_1654_from_start	normal	1139	mfd
0.250871041657714	MamA	sense_mfd_1657_from_start	normal	1139	mfd
0.204867366295039	MamA	antisense_mfd_1783_to_stop	normal	1139	mfd
0.243359563835648	MamA	sense_mfd_1780_to_stop	normal	1139	mfd
0.260713498884313	MamB	antisense_mfd_865_to_stop	normal	1140	mfd
0.214970832396808	MamA	antisense_mfd_613_to_stop	normal	1147	mfd
0.313779881617456	MamA	sense_mfd_610_to_stop	normal	1147	mfd
0.277720752901224	MamA	antisense_mfd_472_to_stop	normal	1141	mfd
0.210063578656157	MamA	sense_mfd_469_to_stop	normal	1141	mfd
0.282723825912224	MamA	antisense_Rv1021_349_from_start	normal	1148	Rv1021
0.180421666819312	MamA	sense_Rv1021_352_from_start	normal	1148	Rv1021
0.289999517223562	HsdM	sense_Rv1021_343_to_stop	normal	1142	Rv1021
0.253168308301352	HsdM	antisense_Rv1021_336_to_stop	normal	1142	Rv1021
0.32660136506241	MamA	antisense_lpqU_229_from_start	hypervariable	1149	lpqU
0.304910729080622	MamA	sense_lpqU_232_from_start	normal	1149	lpqU
0.226068402325131	MamA	antisense_Rv1024_304_to_stop	normal	1145	Rv1024
0.24434910933699	MamA	sense_Rv1024_301_to_stop	normal	1145	Rv1024
0.288315412641027	MamA	antisense_Rv1024_225_to_stop	normal	1150	Rv1024
0.267963570071166	MamA	sense_Rv1024_222_to_stop	normal	1150	Rv1024
0.268992087057407	MamA	5_up_of_Rv1025	normal	1150	none
0.348101968251857	MamA	2_up_of_Rv1025	hypervariable	1150	none
0.256620029370637	MamA	antisense_Rv1026_334_to_stop	normal	1146	Rv1026
0.275700787892125	MamA	sense_Rv1026_331_to_stop	normal	1146	Rv1026
0.245460442405947	MamB	antisense_kdpE_199_from_start	normal	1154	kdpE
0.219724322611165	MamB	antisense_kdpD_272_to_stop	normal	1153	kdpD
0.260440338709514	MamA	sense_kdpD_322_to_stop	normal	1153	kdpD
0.261460751200919	MamA	antisense_kdpD_325_to_stop	normal	1153	kdpD
0.234714272638296	MamB	antisense_kdpD_946_to_stop	normal	1155	kdpD
0.269565854617859	MamB	sense_kdpD_1021_from_start	normal	1149	kdpD
0.251626535077636	MamA	sense_kdpD_715_from_start	normal	1156	kdpD
0.203250125848643	MamA	antisense_kdpD_712_from_start	normal	1156	kdpD
0.232404176227112	MamA	sense_kdpD_160_from_start	normal	1155	kdpD
0.218281199303959	MamA	antisense_kdpD_157_from_start	normal	1155	kdpD
0.228821163557947	MamA	antisense_kdpA_634_from_start	normal	1151	kdpA
0.225788212882464	MamA	sense_kdpA_637_from_start	normal	1151	kdpA
0.242661298847879	MamA	antisense_kdpA_721_to_stop	normal	1158	kdpA
0.246694010013106	MamA	sense_kdpA_718_to_stop	normal	1158	kdpA
0.19809685090621	MamA	sense_trcS_280_from_start	normal	1156	trcS
0.274205750786047	MamA	antisense_trcS_277_from_start	normal	1156	trcS
0.232126541547375	HsdM	antisense_trcR_151_to_stop	normal	1162	trcR
0.208161733108972	HsdM	sense_trcR_158_to_stop	normal	1157	trcR
0.216203110724455	HsdM	antisense_trcR_229_to_stop	normal	1157	trcR
0.281446710833575	HsdM	sense_trcR_236_to_stop	normal	1157	trcR
0.233516787717333	MamA	sense_trcR_323_to_stop	normal	1157	trcR
0.301594614310476	MamA	antisense_trcR_326_to_stop	normal	1157	trcR
0.277787725712246	MamA	sense_esxI_11_to_stop	normal	1164	esxI
0.236370238693195	MamA	antisense_esxI_14_to_stop	normal	1164	esxI
0.26616875446741	MamA	sense_esxI_73_from_start	normal	1159	esxI
0.270860900534616	MamA	antisense_esxI_70_from_start	normal	1159	esxI
0.228250765305188	MamA	sense_esxJ_135_from_start	normal	1166	esxJ
0.259839071079529	MamA	antisense_esxJ_132_from_start	normal	1166	esxJ
0.227560292844297	MamA	583_down_of_Rv1041c	normal	1169	none
0.218567134626192	MamA	580_down_of_Rv1041c	normal	1169	none
0.209061379318087	MamA	305_down_of_Rv1041c	normal	1163	none
0.248070740757903	MamA	302_down_of_Rv1041c	normal	1163	none
0.291561499979438	MamA	antisense_Rv1044_226_to_stop	normal	1173	Rv1044
0.191767482582606	MamA	sense_Rv1044_223_to_stop	normal	1171	Rv1044
0.200627055820455	MamB	antisense_Rv1044_158_to_stop	normal	1173	Rv1044
0.242772811672728	MamB	sense_Rv1045_306_to_stop	normal	1167	Rv1045
0.260413766317335	MamA	antisense_Rv1045_100_to_stop	normal	1172	Rv1045
0.211350760873553	MamA	sense_Rv1045_97_to_stop	normal	1172	Rv1045
0.213243434557221	MamA	32_up_of_Rv1048c	normal	1171	none
0.244918083342354	MamA	35_up_of_Rv1048c	normal	1171	none
0.508039484530396	MamA	7_up_of_Rv1049	hypervariable	1176	none
0.437394131095018	MamA	4_up_of_Rv1049	hypervariable	1178	none
0.264236371432944	MamA	antisense_Rv1050_48_from_start	normal	1178	Rv1050
0.219798037365823	MamA	sense_Rv1050_51_from_start	normal	1178	Rv1050
0.25843131264582	MamA	antisense_Rv1050_340_from_start	normal	1172	Rv1050
0.262640274414608	MamA	sense_Rv1050_343_from_start	normal	1172	Rv1050
0.231200547883442	MamB	21_down_of_Rv1051c	normal	1179	none
0.23102627093175	MamB	sense_Rv1054_13_to_stop	normal	1176	Rv1054
0.301593785380131	MamA	antisense_Rv1056_223_to_stop	normal	1177	Rv1056
0.254337088678806	MamA	sense_Rv1056_220_to_stop	normal	1177	Rv1056
0.258493307846901	HsdM	sense_Rv1056_118_to_stop	normal	1177	Rv1056
0.223269450741243	HsdM	antisense_Rv1056_111_to_stop	normal	1177	Rv1056
0.214966861055141	MamA	89_up_of_Rv1057	normal	1178	none
0.201909966605825	MamA	86_up_of_Rv1057	normal	1178	none
0.279286310590703	HsdM	antisense_Rv1063c_139_to_stop	normal	1184	Rv1063c
0.298488068679771	HsdM	sense_Rv1063c_146_to_stop	normal	1184	Rv1063c
0.271739587975751	MamB	antisense_Rv1065_58_from_start	normal	1193	Rv1065
0.222517223323562	MamA	antisense_Rv1066_22_from_start	normal	1193	Rv1066
0.27033153756139	MamA	sense_Rv1066_25_from_start	normal	1193	Rv1066
0.20380534938295	MamA	sense_Rv1069c_742_to_stop	normal	1192	Rv1069c
0.269865100902661	MamA	antisense_Rv1069c_745_to_stop	normal	1192	Rv1069c
0.229795646021179	MamB	sense_echA9_448_to_stop	normal	1194	echA9
0.270759560942302	MamA	sense_echA9_506_from_start	normal	1194	echA9
0.234624002172687	MamA	antisense_echA9_503_from_start	normal	1194	echA9
0.227652277813915	MamB	antisense_metB_148_from_start	normal	1203	metB
0.244908348851149	MamA	antisense_mca_325_from_start	normal	1205	mca
0.268160147939703	MamA	sense_mca_328_from_start	normal	1205	mca
0.233870151356142	MamB	antisense_Rv1084_571_from_start	normal	1207	Rv1084
0.251430779629359	MamA	antisense_Rv1084_685_from_start	normal	1207	Rv1084
0.23709367199767	MamA	sense_Rv1084_688_from_start	normal	1207	Rv1084
0.221481366503259	MamA	antisense_Rv1084_625_to_stop	normal	1208	Rv1084
0.220441650948603	MamA	sense_Rv1084_622_to_stop	normal	1208	Rv1084
0.231485336166601	MamA	antisense_Rv1086_351_from_start	normal	1209	Rv1086
0.274234713738382	MamA	sense_Rv1086_354_from_start	normal	1209	Rv1086
0.233237435193506	MamB	antisense_Rv1086_40_to_stop	normal	1210	Rv1086
0.253574678826026	MamA	antisense_Rv1090_152_to_stop	normal	1214	Rv1090
0.286115058509346	MamA	sense_Rv1090_149_to_stop	normal	1214	Rv1090
0.27922467871315	MamA	antisense_Rv1090_53_to_stop	normal	1215	Rv1090
0.310616582311883	MamA	sense_Rv1090_50_to_stop	normal	1215	Rv1090
0.285035840215244	MamA	sense_coaA_337_to_stop	normal	1218	coaA
0.205880850030829	MamA	antisense_coaA_340_to_stop	normal	1218	coaA
0.327979041868264	MamA	antisense_glyA1_79_from_start	hypervariable	1219	glyA1
0.311759094412444	MamA	sense_glyA1_82_from_start	normal	1219	glyA1
0.258505645446717	MamB	antisense_glyA1_313_to_stop	normal	1220	glyA1
0.2426539329505	MamB	sense_desA2_385_to_stop	normal	1228	desA2
0.231510906177964	MamB	antisense_phoH2_640_to_stop	normal	1222	phoH2
0.24046166246359	MamA	antisense_phoH2_505_to_stop	normal	1229	phoH2
0.276146162281916	MamA	sense_phoH2_502_to_stop	normal	1229	phoH2
0.244697309658155	MamA	antisense_phoH2_241_to_stop	normal	1223	phoH2
0.24014455357572	MamA	sense_phoH2_238_to_stop	normal	1223	phoH2
0.282838022101391	MamA	antisense_Rv1096_369_from_start	normal	1230	Rv1096
0.265629015849756	MamA	sense_Rv1096_372_from_start	normal	1230	Rv1096
0.280131764802133	MamA	antisense_Rv1096_269_to_stop	normal	1224	Rv1096
0.271527069534078	MamA	sense_Rv1096_266_to_stop	normal	1224	Rv1096
0.232698072979228	MamB	antisense_Rv1096_124_to_stop	normal	1224	Rv1096
0.209173156432112	MamA	antisense_Rv1100_36_from_start	normal	1227	Rv1100
0.230509363239604	MamA	sense_Rv1100_39_from_start	normal	1227	Rv1100
0.396040368853282	HsdM	antisense_Rv1101c_169_to_stop	hypervariable	1228	Rv1101c
0.410135959056138	HsdM	sense_Rv1101c_176_to_stop	hypervariable	1228	Rv1101c
0.246017858789641	HsdM	antisense_mazE3_45_to_stop	normal	1230	mazE3
0.249399795692763	HsdM	sense_mazE3_52_to_stop	normal	1230	mazE3
0.196138557149377	MamB	antisense_Rv1104_15_from_start	normal	1230	Rv1104
0.194993824000175	MamB	antisense_Rv1104_196_to_stop	normal	1237	Rv1104
0.271100703637504	HsdM	sense_Rv1105_178_from_start	normal	1231	Rv1105
0.211684193943186	HsdM	antisense_Rv1105_185_from_start	normal	1231	Rv1105
0.314104968446504	MamA	sense_Rv1106c_172_from_start	hypervariable	1239	Rv1106c
0.225661585643677	MamA	antisense_Rv1106c_169_from_start	normal	1239	Rv1106c
0.258912204295566	MamA	sense_xseB_115_from_start	normal	1233	xseB
0.280895120960699	MamA	antisense_xseB_112_from_start	normal	1233	xseB
0.243520405527885	MamA	sense_Rv1109c_187_from_start	normal	1241	Rv1109c
0.240218234772043	MamA	antisense_Rv1109c_184_from_start	normal	1241	Rv1109c
0.220763999252176	MamA	antisense_lytB2_103_to_stop	normal	1236	lytB2
0.25339201351974	MamA	sense_lytB2_100_to_stop	normal	1236	lytB2
0.26641609868927	MamB	antisense_Rv1111c_189_from_start	normal	1237	Rv1111c
0.241761318054257	MamA	antisense_Rv1112_418_from_start	normal	1237	Rv1112
0.256198579052298	MamA	sense_Rv1112_421_from_start	normal	1237	Rv1112
0.192709351387236	MamA	antisense_Rv1112_439_from_start	normal	1237	Rv1112
0.216800909266717	MamA	sense_Rv1112_442_from_start	normal	1237	Rv1112
0.225338082279873	MamB	antisense_Rv1112_493_from_start	normal	1244	Rv1112
0.262087030116763	MamA	antisense_Rv1112_325_to_stop	normal	1238	Rv1112
0.233915200053836	MamA	sense_Rv1112_322_to_stop	normal	1238	Rv1112
0.260704052974177	MamA	sense_Rv1118c_71_to_stop	normal	1241	Rv1118c
0.230831264439882	MamA	antisense_Rv1118c_74_to_stop	normal	1241	Rv1118c
0.266803803527818	MamA	13_up_of_zwf1	normal	1242	none
0.231293394849488	MamA	10_up_of_zwf1	normal	1242	none
0.186907423065673	MamB	antisense_zwf1_499_from_start	normal	1243	zwf1
0.24941528379194	MamA	antisense_zwf1_541_from_start	normal	1243	zwf1
0.273647549878569	MamA	sense_zwf1_544_from_start	normal	1243	zwf1
0.223502352255438	MamB	antisense_zwf1_676_from_start	normal	1250	zwf1
0.197462160818106	MamB	antisense_gnd2_75_from_start	normal	1244	gnd2
0.212762135529257	MamA	8_up_of_bpoB	normal	1246	none
0.246951247866528	MamA	11_up_of_bpoB	normal	1246	none
0.267114960326637	MamB	antisense_ephC_466_to_stop	normal	1246	ephC
0.430108546656223	MamA	antisense_Rv1125_397_to_stop	hypervariable	1254	Rv1125
0.322270593824821	MamA	sense_Rv1125_394_to_stop	hypervariable	1254	Rv1125
0.330514920953302	MamA	sense_Rv1128c_448_from_start	hypervariable	1251	Rv1128c
0.317174928385545	MamA	antisense_Rv1128c_445_from_start	hypervariable	1251	Rv1128c
0.271032522704177	MamA	sense_Rv1128c_118_from_start	normal	1258	Rv1128c
0.337601494703591	MamA	antisense_Rv1128c_115_from_start	hypervariable	1258	Rv1128c
0.222811663342486	MamA	antisense_prpD_708_from_start	normal	1254	prpD
0.235858672720276	MamA	sense_prpD_711_from_start	normal	1254	prpD
0.207940253696667	MamA	antisense_prpC_289_to_stop	normal	1256	prpC
0.26560268377494	MamA	sense_prpC_286_to_stop	normal	1256	prpC
0.318669053129306	MamA	antisense_Rv1132_10_from_start	hypervariable	1256	Rv1132
0.308363587073507	MamA	sense_Rv1132_13_from_start	normal	1256	Rv1132
0.211989893948894	MamA	antisense_Rv1132_712_to_stop	normal	1257	Rv1132
0.23879562347076	MamA	sense_Rv1132_709_to_stop	normal	1257	Rv1132
0.218120735153382	MamA	antisense_Rv1132_427_to_stop	normal	1257	Rv1132
0.23872639820297	MamA	sense_Rv1132_424_to_stop	normal	1257	Rv1132
0.275086096201391	MamB	antisense_metE_454_to_stop	normal	1258	metE
0.220066969057529	MamA	sense_metE_913_from_start	normal	1266	metE
0.261374417172199	MamA	antisense_metE_910_from_start	normal	1266	metE
0.212805270516007	MamA	sense_metE_343_from_start	normal	1260	metE
0.278461572687938	MamA	antisense_metE_340_from_start	normal	1260	metE
0.247443130398403	MamA	sense_metE_130_from_start	normal	1260	metE
0.217751559142518	MamA	antisense_metE_127_from_start	normal	1260	metE
0.279395376022997	MamB	213_up_of_Rv1134	normal	1260	none
0.231189715320554	MamB	367_down_of_Rv1147	normal	1281	none
0.252913313596734	HsdM	antisense_Rv1148c_190_to_stop	normal	1276	Rv1148c
0.27420116697188	HsdM	sense_Rv1148c_197_to_stop	normal	1276	Rv1148c
0.276544374935347	MamA	sense_Rv1148c_269_to_stop	normal	1282	Rv1148c
0.324331548545443	MamA	antisense_Rv1148c_272_to_stop	hypervariable	1282	Rv1148c
0.268209922496646	MamB	sense_Rv1148c_607_from_start	normal	1277	Rv1148c
0.246014338473235	MamB	53_up_of_Rv1148c	normal	1283	none
0.23701145032273	MamA	sense_Rv1154c_250_from_start	normal	1281	Rv1154c
0.249968842456391	MamA	antisense_Rv1154c_247_from_start	normal	1281	Rv1154c
0.225523686417746	HsdM	sense_Rv1155_216_to_stop	normal	1287	Rv1155
0.21967652072892	HsdM	antisense_Rv1155_209_to_stop	normal	1287	Rv1155
0.209710156634652	MamA	60_down_of_Rv1157c	normal	1282	none
0.28107561269329	MamA	57_down_of_Rv1157c	normal	1282	none
0.229870662804618	MamB	sense_Rv1158c_86_from_start	normal	1290	Rv1158c
0.306796966804541	MamA	antisense_narG_1742_to_stop	normal	1289	narG
0.259261495571203	MamA	sense_narG_1739_to_stop	normal	1289	narG
0.228676597694192	MamA	antisense_narG_784_to_stop	normal	1290	narG
0.2341799009247	MamA	sense_narG_781_to_stop	normal	1290	narG
0.239100218680851	MamB	antisense_typA_88_from_start	normal	1294	typA
0.233219101440302	MamA	antisense_typA_136_from_start	normal	1294	typA
0.290841945956349	MamA	sense_typA_139_from_start	normal	1294	typA
0.239482150719674	MamA	antisense_lpqW_772_to_stop	normal	1297	lpqW
0.306634429580061	MamA	sense_lpqW_769_to_stop	normal	1297	lpqW
0.242010694419852	MamA	sense_PPE17_265_to_stop	normal	1298	PPE17
0.204623881296464	MamA	antisense_PPE17_268_to_stop	normal	1298	PPE17
0.226538205757362	MamB	sense_PPE17_296_from_start	normal	1299	PPE17
0.201667537935892	MamA	sense_PE12_426_from_start	normal	1302	PE12
0.238594013448843	MamA	antisense_PE12_423_from_start	normal	1302	PE12
0.297024939304568	HsdM	76_up_of_PE12	normal	1308	none
0.212716519328828	HsdM	83_up_of_PE12	normal	1308	none
0.269977796954152	MamA	antisense_fbiC_544_from_start	normal	1303	fbiC
0.269058311424754	MamA	sense_fbiC_547_from_start	normal	1303	fbiC
0.258196357473132	MamA	antisense_fbiC_643_from_start	normal	1309	fbiC
0.259328051135624	MamA	sense_fbiC_646_from_start	normal	1309	fbiC
0.269416158471169	MamB	antisense_fbiC_724_from_start	normal	1309	fbiC
0.223894012002169	MamA	sense_fadH_118_to_stop	normal	1306	fadH
0.232431006214542	MamA	antisense_fadH_121_to_stop	normal	1306	fadH
0.235491042969415	MamA	sense_Rv1176c_13_to_stop	normal	1308	Rv1176c
0.25945018467977	MamA	antisense_Rv1176c_16_to_stop	normal	1308	Rv1176c
0.287828467581591	MamB	antisense_Rv1176c_241_to_stop	normal	1308	Rv1176c
0.21972615775801	MamA	sense_Rv1176c_178_from_start	normal	1314	Rv1176c
0.261873480338892	MamA	antisense_Rv1176c_175_from_start	normal	1314	Rv1176c
0.225825476909694	MamB	antisense_Rv1178_400_from_start	normal	1315	Rv1178
0.23965919043437	MamB	sense_pks3_2110_from_start	normal	1321	pks3
0.248943107249311	MamA	antisense_pks3_3021_to_stop	normal	1316	pks3
0.299847249080607	MamA	sense_pks3_3018_to_stop	normal	1316	pks3
0.295870733261856	MamA	antisense_pks3_1781_to_stop	normal	1318	pks3
0.265787283919853	MamA	sense_pks3_1778_to_stop	normal	1318	pks3
0.429088987244263	MamA	antisense_pks3_646_to_stop	hypervariable	1319	pks3
0.388779817447817	MamA	sense_pks3_643_to_stop	hypervariable	1319	pks3
0.240159695239259	MamA	antisense_papA3_462_to_stop	normal	1320	papA3
0.404800664392978	MamA	sense_papA3_459_to_stop	hypervariable	1320	papA3
0.252636441100132	MamA	antisense_mmpL10_108_from_start	normal	1327	mmpL10
0.402001216447111	MamA	sense_mmpL10_111_from_start	hypervariable	1327	mmpL10
0.402730929211329	MamA	antisense_mmpL10_1288_from_start	hypervariable	1328	mmpL10
0.356417438412569	MamA	sense_mmpL10_1291_from_start	hypervariable	1328	mmpL10
0.224782202047766	MamB	antisense_mmpL10_544_to_stop	normal	1323	mmpL10
0.247752878788312	MamA	antisense_mmpL10_431_to_stop	normal	1324	mmpL10
0.224488378674465	MamA	sense_mmpL10_428_to_stop	normal	1324	mmpL10
0.226496862904553	MamA	antisense_mmpL10_236_to_stop	normal	1324	mmpL10
0.327202897773244	MamA	sense_mmpL10_233_to_stop	hypervariable	1324	mmpL10
0.236525021088669	MamB	antisense_Rv1186c_181_to_stop	normal	1333	Rv1186c
0.394637193971613	HsdM	sense_rocA_797_to_stop	hypervariable	1330	rocA
0.345451507185682	HsdM	antisense_rocA_790_to_stop	hypervariable	1330	rocA
0.219547152428041	MamA	antisense_sigI_188_to_stop	normal	1338	sigI
0.234541627826122	MamA	sense_sigI_185_to_stop	normal	1338	sigI
0.229504488705665	MamA	antisense_Rv1190_156_from_start	normal	1333	Rv1190
0.280524829460985	MamA	sense_Rv1190_159_from_start	normal	1333	Rv1190
0.247486477494099	MamA	antisense_Rv1190_323_to_stop	normal	1333	Rv1190
0.268185969838484	MamA	sense_Rv1190_320_to_stop	normal	1333	Rv1190
0.269980691997245	HsdM	sense_Rv1192_337_to_stop	normal	1335	Rv1192
0.222687700622729	HsdM	antisense_Rv1192_330_to_stop	normal	1335	Rv1192
0.263695417392073	MamA	sense_Rv1194c_618_from_start	normal	1343	Rv1194c
0.237574812894215	MamA	antisense_Rv1194c_615_from_start	normal	1343	Rv1194c
0.213699531785492	MamB	antisense_Rv1194c_205_from_start	normal	1338	Rv1194c
0.256005720095782	MamB	sense_PPE18_529_to_stop	normal	1339	PPE18
0.273360177699583	MamB	antisense_PPE18_52_to_stop	normal	1340	PPE18
0.185700498735277	MamA	antisense_esxK_132_from_start	normal	1346	esxK
0.222807711961281	MamA	sense_esxK_135_from_start	normal	1346	esxK
0.281953676744818	MamA	antisense_esxL_70_from_start	normal	1343	esxL
0.278881286116207	MamA	sense_esxL_73_from_start	normal	1343	esxL
0.307798171203936	MamA	antisense_esxL_14_to_stop	normal	1341	esxL
0.259434390344129	MamA	sense_esxL_11_to_stop	normal	1341	esxL
0.18535414885895	MamB	antisense_dapD_194_to_stop	normal	1344	dapD
0.220064056750552	HsdM	antisense_dapD_214_from_start	normal	1350	dapD
0.225239029711163	HsdM	sense_dapD_207_from_start	normal	1344	dapD
0.254824215142613	MamA	sense_dapD_17_from_start	normal	1345	dapD
0.266609424407769	MamA	antisense_dapD_14_from_start	normal	1345	dapD
0.271430741828453	MamB	sense_dapE_443_to_stop	normal	1351	dapE
0.237506746091792	MamA	sense_Rv1203c_61_from_start	normal	1352	Rv1203c
0.266799057101407	MamA	antisense_Rv1203c_58_from_start	normal	1352	Rv1203c
0.239723395541368	MamA	sense_Rv1204c_173_from_start	normal	1348	Rv1204c
0.254775653301164	MamA	antisense_Rv1204c_170_from_start	normal	1348	Rv1204c
0.239666124059679	MamB	sense_Rv1209_181_from_start	normal	1353	Rv1209
0.306326303716845	MamA	antisense_tagA_139_from_start	normal	1359	tagA
0.262387804402035	MamA	sense_tagA_142_from_start	normal	1359	tagA
0.256171028917315	MamA	antisense_Rv1211_45_from_start	normal	1354	Rv1211
0.271813211925961	MamA	sense_Rv1211_48_from_start	normal	1354	Rv1211
0.201678853984321	HsdM	sense_Rv1211_98_to_stop	normal	1354	Rv1211
0.217328029941391	HsdM	antisense_Rv1211_91_to_stop	normal	1354	Rv1211
0.306808810271821	MamA	antisense_glgC_544_from_start	normal	1356	glgC
0.305572242779492	MamA	sense_glgC_547_from_start	normal	1356	glgC
0.193061991082627	MamA	antisense_glgC_73_to_stop	normal	1356	glgC
0.225541638775556	MamA	sense_glgC_70_to_stop	normal	1356	glgC
0.168907234421406	HsdM	antisense_Rv1215c_774_to_stop	normal	1358	Rv1215c
0.236031454599393	HsdM	sense_Rv1215c_781_to_stop	normal	1358	Rv1215c
0.271879011083075	MamA	sense_Rv1215c_70_from_start	normal	1359	Rv1215c
0.306764982774067	MamA	antisense_Rv1215c_67_from_start	normal	1359	Rv1215c
0.234312647849442	MamA	sense_Rv1217c_133_to_stop	normal	1360	Rv1217c
0.275440027321364	MamA	antisense_Rv1217c_136_to_stop	normal	1360	Rv1217c
0.223308128107041	MamB	antisense_Rv1217c_664_from_start	normal	1361	Rv1217c
0.267565934278215	HsdM	antisense_Rv1217c_16_from_start	normal	1367	Rv1217c
0.242648410190274	HsdM	sense_Rv1217c_9_from_start	normal	1367	Rv1217c
0.191628616461681	MamA	sense_Rv1218c_70_to_stop	normal	1367	Rv1218c
0.239273176504146	MamA	antisense_Rv1218c_73_to_stop	normal	1367	Rv1218c
0.239617828957938	MamA	sense_Rv1219c_88_to_stop	normal	1368	Rv1219c
0.260474721977975	MamA	antisense_Rv1219c_91_to_stop	normal	1368	Rv1219c
0.508258166213948	HsdM	18_up_of_Rv1219c	hypervariable	1363	none
0.547470134114779	HsdM	25_up_of_Rv1219c	hypervariable	1363	none
0.253255643830773	MamA	antisense_rseA_108_to_stop	normal	1371	rseA
0.257306035306442	MamA	sense_rseA_105_to_stop	normal	1371	rseA
0.230081438204591	MamB	antisense_Rv1226c_640_to_stop	normal	1369	Rv1226c
0.228575385351158	HsdM	52_down_of_Rv1231c	normal	1374	none
0.225271706110829	HsdM	45_down_of_Rv1231c	normal	1374	none
0.265827738328725	MamB	sense_Rv1231c_244_from_start	normal	1380	Rv1231c
0.232157078893306	MamA	sense_Rv1232c_583_to_stop	normal	1375	Rv1232c
0.195464239283075	MamA	antisense_Rv1232c_586_to_stop	normal	1375	Rv1232c
0.192056795449256	HsdM	antisense_Rv1232c_175_from_start	normal	1375	Rv1232c
0.269100661946431	HsdM	sense_Rv1232c_168_from_start	normal	1375	Rv1232c
0.214156448697833	HsdM	sense_lpqY_561_from_start	normal	1380	lpqY
0.222027656516775	HsdM	antisense_lpqY_568_from_start	normal	1378	lpqY
0.231372290971787	MamB	antisense_lpqY_289_to_stop	normal	1384	lpqY
0.228626830281131	HsdM	sense_lpqY_220_to_stop	normal	1381	lpqY
0.215845968577702	HsdM	antisense_lpqY_213_to_stop	normal	1381	lpqY
0.23704065199238	MamB	antisense_sugA_77_to_stop	normal	1385	sugA
0.234612396940711	MamA	sense_corA_86_to_stop	normal	1384	corA
0.24401203708028	MamA	antisense_corA_89_to_stop	normal	1384	corA
0.262786702862094	MamA	38_up_of_corA	normal	1385	none
0.249258912918294	MamA	41_up_of_corA	normal	1385	none
0.245317204347946	MamA	antisense_mdh_307_from_start	normal	1383	mdh
0.21422884452444	MamA	sense_mdh_310_from_start	normal	1383	mdh
0.274341635977379	MamA	antisense_vapB33_43_to_stop	normal	1384	vapB33
0.247488139255026	MamA	sense_vapB33_40_to_stop	normal	1384	vapB33
0.218298156547291	MamA	sense_Rv1245c_407_to_stop	normal	1388	Rv1245c
0.267118752455703	MamA	antisense_Rv1245c_410_to_stop	normal	1388	Rv1245c
0.223527860595932	MamA	sense_relB_112_to_stop	normal	1391	relB
0.219849653405999	MamA	antisense_relB_115_to_stop	normal	1391	relB
0.20765421355585	MamB	antisense_Rv1248c_232_to_stop	normal	1389	Rv1248c
0.227539545288011	MamA	sense_Rv1248c_400_to_stop	normal	1395	Rv1248c
0.246065278417164	MamA	antisense_Rv1248c_403_to_stop	normal	1392	Rv1248c
0.239213099633152	MamA	sense_Rv1248c_1090_to_stop	normal	1390	Rv1248c
0.246762999739453	MamA	antisense_Rv1248c_1093_to_stop	normal	1390	Rv1248c
0.247104195820967	MamA	sense_Rv1248c_1252_to_stop	normal	1390	Rv1248c
0.223569653354204	MamA	antisense_Rv1248c_1255_to_stop	normal	1390	Rv1248c
0.256703638040988	MamA	sense_Rv1248c_1846_from_start	normal	1391	Rv1248c
0.217714136983984	MamA	antisense_Rv1248c_1843_from_start	normal	1391	Rv1248c
0.2535102673107	MamA	sense_Rv1248c_1825_from_start	normal	1391	Rv1248c
0.306380230136373	MamA	antisense_Rv1248c_1822_from_start	normal	1391	Rv1248c
0.243074678792976	MamA	sense_Rv1248c_1071_from_start	normal	1391	Rv1248c
0.270658249730601	MamA	antisense_Rv1248c_1068_from_start	normal	1391	Rv1248c
0.235969026300264	MamA	antisense_Rv1250_790_from_start	normal	1394	Rv1250
0.279627134215699	MamA	sense_Rv1250_793_from_start	normal	1394	Rv1250
0.26261386058166	MamB	sense_Rv1250_122_to_stop	normal	1401	Rv1250
0.254462279884509	MamB	antisense_Rv1251c_1489_from_start	normal	1403	Rv1251c
0.509560666506363	MamA	sense_Rv1251c_1312_from_start	hypervariable	1403	Rv1251c
0.646658398661905	MamA	antisense_Rv1251c_1309_from_start	hypervariable	1403	Rv1251c
0.234371651749233	HsdM	3_up_of_lprE	normal	1405	none
0.223761359488998	HsdM	10_up_of_lprE	normal	1405	none
0.236221505639722	MamB	antisense_deaD_808_from_start	normal	1406	deaD
0.191658009089811	MamA	sense_Rv1257c_622_to_stop	normal	1405	Rv1257c
0.271705893615725	MamA	antisense_Rv1257c_625_to_stop	normal	1405	Rv1257c
0.275274221613305	MamB	antisense_Rv1257c_456_from_start	normal	1411	Rv1257c
0.213571357082089	MamB	antisense_Rv1262c_6_from_start	normal	1410	Rv1262c
0.261436392709186	MamA	antisense_Rv1264_448_from_start	normal	1412	Rv1264
0.262259458835348	MamA	sense_Rv1264_451_from_start	normal	1412	Rv1264
0.204193078609035	MamB	antisense_pknH_606_from_start	normal	1415	pknH
0.266156185386226	MamA	sense_Rv1272c_571_from_start	normal	1427	Rv1272c
0.293499445275697	MamA	antisense_Rv1272c_568_from_start	normal	1427	Rv1272c
0.438827555748268	MamA	antisense_Rv1278_1161_to_stop	hypervariable	1434	Rv1278
0.397111577256535	MamA	sense_Rv1278_1158_to_stop	hypervariable	1434	Rv1278
0.230325350780851	MamB	antisense_Rv1320c_294_from_start	normal	1485	Rv1320c
0.231083113053907	HsdM	sense_fadA4_21_from_start	normal	1487	fadA4
0.218257700599322	HsdM	antisense_fadA4_28_from_start	normal	1487	fadA4
0.247787347186392	MamA	antisense_fadA4_100_from_start	normal	1487	fadA4
0.255750743332804	MamA	sense_fadA4_103_from_start	normal	1487	fadA4
0.271922935145891	MamA	antisense_Rv1324_406_from_start	normal	1495	Rv1324
0.333437284697208	MamA	sense_Rv1324_409_from_start	hypervariable	1495	Rv1324
0.289566876543056	MamA	antisense_Rv1324_114_to_stop	normal	1489	Rv1324
0.292725744353285	MamA	sense_Rv1324_111_to_stop	normal	1489	Rv1324
0.224822208058894	MamA	sense_PE_PGRS24_617_to_stop	normal	1496	PE_PGRS24
0.217456825082745	MamA	antisense_PE_PGRS24_620_to_stop	normal	1496	PE_PGRS24
0.179051957791511	MamB	antisense_glgB_224_to_stop	normal	1497	glgB
0.200447798498655	MamB	antisense_glgE_245_to_stop	normal	1500	glgE
0.211743363492633	MamB	sense_glgE_712_to_stop	normal	1494	glgE
0.274460371512086	MamA	antisense_glgP_352_from_start	normal	1496	glgP
0.22759564291892	MamA	sense_glgP_355_from_start	normal	1496	glgP
0.240323085219754	MamA	antisense_glgP_610_to_stop	normal	1503	glgP
0.221868156062552	MamA	sense_glgP_607_to_stop	normal	1503	glgP
0.244261083259222	MamA	sense_dinG_862_to_stop	normal	1499	dinG
0.203562854027708	MamA	antisense_dinG_865_to_stop	normal	1499	dinG
0.306384852228239	MamA	antisense_cysO_103_from_start	normal	1510	cysO
0.230537055089499	MamA	sense_cysO_106_from_start	normal	1510	cysO
0.283030020711607	MamA	antisense_cysM_223_from_start	normal	1505	cysM
0.266891962915702	MamA	sense_cysM_226_from_start	normal	1505	cysM
0.233974348953042	MamB	antisense_cysM_294_from_start	normal	1505	cysM
0.23811778118746	HsdM	sense_cysM_454_from_start	normal	1505	cysM
0.249925513306118	HsdM	antisense_cysM_461_from_start	normal	1505	cysM
0.239495769682983	MamA	antisense_murI_197_to_stop	normal	1507	murI
0.260472708773383	MamA	sense_murI_194_to_stop	normal	1507	murI
0.213467690371862	MamA	antisense_mbtL_37_to_stop	normal	1516	mbtL
0.34305520359913	MamA	sense_mbtL_34_to_stop	hypervariable	1516	mbtL
0.220802834782216	HsdM	sense_mbtM_501_from_start	normal	1511	mbtM
0.234504858931298	HsdM	antisense_mbtM_508_from_start	normal	1511	mbtM
0.207922154632506	MamA	antisense_mbtM_16_to_stop	normal	1512	mbtM
0.263444016888666	MamA	sense_mbtM_13_to_stop	normal	1512	mbtM
0.155651222400917	MamA	antisense_irtA_717_to_stop	normal	1516	irtA
0.22839230046936	MamA	sense_irtA_714_to_stop	normal	1516	irtA
0.21900908195699	MamB	23_down_of_irtB	normal	1524	none
0.295842058880404	MamA	sense_Rv1356c_12_to_stop	normal	1531	Rv1356c
0.257266430500454	MamA	antisense_Rv1356c_15_to_stop	normal	1531	Rv1356c
0.250811446311685	MamA	sense_Rv1357c_269_to_stop	normal	1532	Rv1357c
0.259573369009006	MamA	antisense_Rv1357c_272_to_stop	normal	1532	Rv1357c
0.286885509444678	MamA	108_up_of_Rv1357c	normal	1533	none
0.257891368876605	MamA	111_up_of_Rv1357c	normal	1533	none
0.250972213626468	MamB	antisense_Rv1358_424_from_start	normal	1529	Rv1358
0.271571775162764	MamA	antisense_Rv1359_131_from_start	normal	1537	Rv1359
0.245842516102706	MamA	sense_Rv1359_134_from_start	normal	1537	Rv1359
0.236483116462725	MamA	antisense_Rv1359_316_from_start	normal	1537	Rv1359
0.23261785969782	MamA	sense_Rv1359_319_from_start	normal	1537	Rv1359
0.225279196716031	MamB	antisense_Rv1360_370_from_start	normal	1539	Rv1360
0.295658303611266	MamB	sense_Rv1362c_229_to_stop	normal	1536	Rv1362c
0.236268632719452	HsdM	antisense_Rv1362c_249_from_start	normal	1537	Rv1362c
0.213493891856361	HsdM	sense_Rv1362c_242_from_start	normal	1537	Rv1362c
0.317218587862625	HsdM	antisense_Rv1364c_768_from_start	hypervariable	1538	Rv1364c
0.326295428448418	HsdM	sense_Rv1364c_761_from_start	hypervariable	1538	Rv1364c
0.237180155376156	MamA	sense_Rv1364c_199_from_start	normal	1540	Rv1364c
0.223756979166486	MamA	antisense_Rv1364c_196_from_start	normal	1540	Rv1364c
0.227546285866711	MamB	antisense_Rv1366_409_from_start	normal	1546	Rv1366
0.21523156992575	MamB	antisense_Rv1367c_166_from_start	normal	1543	Rv1367c
0.265353939117368	MamA	antisense_Rv1375_412_to_stop	normal	1556	Rv1375
0.289820101110801	MamA	sense_Rv1375_409_to_stop	normal	1556	Rv1375
0.22610229330082	MamA	sense_Rv1377c_85_to_stop	normal	1554	Rv1377c
0.202368751302157	MamA	antisense_Rv1377c_88_to_stop	normal	1554	Rv1377c
0.26659571415172	MamA	sense_Rv1378c_217_from_start	normal	1553	Rv1378c
0.247454964784997	MamA	antisense_Rv1378c_214_from_start	normal	1553	Rv1378c
0.189918468895381	MamB	sense_pyrB_427_from_start	normal	1557	pyrB
0.215660203356458	MamB	antisense_pyrC_459_from_start	normal	1558	pyrC
0.68563195675031	HsdM	sense_pyrC_548_to_stop	hypervariable	1559	pyrC
0.65012545261207	HsdM	antisense_pyrC_541_to_stop	hypervariable	1559	pyrC
0.227207354947607	MamA	antisense_pyrC_184_to_stop	normal	1559	pyrC
0.335858762707908	MamA	sense_pyrC_181_to_stop	hypervariable	1559	pyrC
0.349844182896431	MamA	antisense_Rv1382_16_to_stop	hypervariable	1560	Rv1382
0.287456595498537	MamA	sense_Rv1382_13_to_stop	normal	1560	Rv1382
0.540201496096703	MamA	antisense_carB_1216_from_start	hypervariable	1562	carB
0.515185657361362	MamA	sense_carB_1219_from_start	hypervariable	1562	carB
0.240774293811536	MamA	antisense_pyrF_226_from_start	normal	1564	pyrF
0.307209837784737	MamA	sense_pyrF_229_from_start	normal	1564	pyrF
0.230884772856661	MamB	sense_PPE20_94_from_start	normal	1566	PPE20
0.200739978117897	MamB	antisense_PPE20_252_from_start	normal	1566	PPE20
0.234289817890482	MamA	antisense_PPE20_477_from_start	normal	1564	PPE20
0.224921352890041	MamA	sense_PPE20_480_from_start	normal	1566	PPE20
0.235835985754253	MamB	antisense_PPE20_649_from_start	normal	1566	PPE20
0.251937502306063	MamB	antisense_gmk_54_to_stop	normal	1569	gmk
0.292443865359453	MamA	antisense_dfp_541_from_start	normal	1570	dfp
0.208539012823069	MamA	sense_dfp_544_from_start	normal	1570	dfp
0.209651669115612	MamA	antisense_metK_580_to_stop	normal	1568	metK
0.238793302515671	MamA	sense_metK_577_to_stop	normal	1568	metK
0.226047806181686	MamA	sense_cyp132_556_from_start	normal	1574	cyp132
0.286041473175924	MamA	antisense_cyp132_553_from_start	normal	1574	cyp132
0.465635717329421	HsdM	sense_Rv1395_219_from_start	hypervariable	1575	Rv1395
0.365375778281037	HsdM	antisense_Rv1395_226_from_start	hypervariable	1575	Rv1395
0.244047100265514	HsdM	sense_Rv1395_505_from_start	normal	1573	Rv1395
0.243370663443111	HsdM	antisense_Rv1395_512_from_start	normal	1573	Rv1395
0.227166617384777	MamA	antisense_priA_585_to_stop	normal	1583	priA
0.248305191574719	MamA	sense_priA_582_to_stop	normal	1583	priA
0.339773248654109	MamA	antisense_priA_259_to_stop	hypervariable	1583	priA
0.215864455417896	MamA	sense_priA_256_to_stop	normal	1583	priA
0.228778571829348	MamA	antisense_priA_109_to_stop	normal	1580	priA
0.287029429147848	MamA	sense_priA_106_to_stop	normal	1580	priA
0.258180146198291	MamA	sense_Rv1403c_289_from_start	normal	1582	Rv1403c
0.19505444614674	MamA	antisense_Rv1403c_286_from_start	normal	1582	Rv1403c
0.292100743901456	MamA	antisense_rpe_319_to_stop	normal	1586	rpe
0.208918305037249	MamA	sense_rpe_316_to_stop	normal	1586	rpe
0.253456465173745	MamA	antisense_ribG_500_to_stop	normal	1587	ribG
0.261909278437685	MamA	sense_ribG_497_to_stop	normal	1587	ribG
0.276819029159481	MamA	antisense_ribG_485_to_stop	normal	1587	ribG
0.222614214124158	MamA	sense_ribG_482_to_stop	normal	1587	ribG
0.221208052063582	HsdM	antisense_Rv1410c_121_from_start	normal	1591	Rv1410c
0.244786017192014	HsdM	sense_Rv1410c_114_from_start	normal	1591	Rv1410c
0.271472579896639	MamA	antisense_Rv1422_421_from_start	normal	1601	Rv1422
0.258386253418752	MamA	sense_Rv1422_424_from_start	normal	1601	Rv1422
0.240134714097772	MamB	antisense_whiA_377_from_start	normal	1602	whiA
0.37126376960869	MamA	antisense_whiA_157_to_stop	hypervariable	1600	whiA
0.259429518427911	MamA	sense_whiA_154_to_stop	normal	1600	whiA
0.276131703588247	MamA	antisense_Rv1425_601_from_start	normal	1604	Rv1425
0.250623101811345	MamA	sense_Rv1425_604_from_start	normal	1604	Rv1425
0.251102905336382	MamA	antisense_Rv1425_19_to_stop	normal	1605	Rv1425
0.23772258222567	MamA	sense_Rv1425_16_to_stop	normal	1605	Rv1425
0.244838742820553	HsdM	antisense_fadD12_408_to_stop	normal	1604	fadD12
0.19253418544776	HsdM	sense_fadD12_415_to_stop	normal	1604	fadD12
0.213672643196367	HsdM	sense_Rv1429_190_from_start	normal	1609	Rv1429
0.248417749763549	HsdM	antisense_Rv1429_197_from_start	normal	1609	Rv1429
0.232890534414178	MamA	antisense_Rv1429_221_from_start	normal	1606	Rv1429
0.282266978099701	MamA	sense_Rv1429_224_from_start	normal	1606	Rv1429
0.285361720027884	MamA	antisense_Rv1429_349_from_start	normal	1607	Rv1429
0.242557443292599	MamA	sense_Rv1429_352_from_start	normal	1607	Rv1429
0.235302304694788	MamB	antisense_Rv1429_421_to_stop	normal	1607	Rv1429
0.298349296373108	MamA	antisense_Rv1429_49_to_stop	normal	1607	Rv1429
0.242870578787561	MamA	sense_Rv1429_46_to_stop	normal	1607	Rv1429
0.217450060692234	MamB	antisense_Rv1431_601_from_start	normal	1612	Rv1431
0.321592471432954	MamA	antisense_Rv1432_88_from_start	hypervariable	1614	Rv1432
0.262608937904904	MamA	sense_Rv1432_91_from_start	normal	1614	Rv1432
0.237628775216692	MamA	antisense_pgk_284_from_start	normal	1616	pgk
0.265510525482402	MamA	sense_pgk_287_from_start	normal	1616	pgk
0.219338620114115	MamA	antisense_pgk_352_from_start	normal	1616	pgk
0.246806505369914	MamA	sense_pgk_355_from_start	normal	1616	pgk
0.231170127737532	HsdM	sense_pgk_555_from_start	normal	1616	pgk
0.228045599044333	HsdM	antisense_pgk_562_from_start	normal	1619	pgk
0.22296059113752	MamA	antisense_pgk_565_from_start	normal	1619	pgk
0.23179839205322	MamA	sense_pgk_568_from_start	normal	1619	pgk
0.240367765025037	MamB	antisense_Rv1439c_121_to_stop	normal	1618	Rv1439c
0.241005609480063	MamA	antisense_bisC_1066_to_stop	normal	1625	bisC
0.271814753407783	MamA	sense_bisC_1063_to_stop	normal	1625	bisC
0.235022853639807	HsdM	sense_bisC_962_to_stop	normal	1623	bisC
0.220342724967136	HsdM	antisense_bisC_955_to_stop	normal	1623	bisC
0.324317014886787	MamA	22_down_of_Rv1444c	hypervariable	1630	none
0.238250155931249	MamA	19_down_of_Rv1444c	normal	1630	none
0.317998131217917	MamA	sense_opcA_389_to_stop	hypervariable	1626	opcA
0.287885800964027	MamA	antisense_opcA_392_to_stop	normal	1626	opcA
0.317395558216169	MamA	sense_zwf2_376_from_start	hypervariable	1628	zwf2
0.406250186378202	MamA	antisense_zwf2_373_from_start	hypervariable	1628	zwf2
0.22209173508781	MamA	sense_zwf2_216_from_start	normal	1634	zwf2
0.25099710125045	MamA	antisense_zwf2_213_from_start	normal	1634	zwf2
0.262877041959684	MamA	sense_tal_37_to_stop	normal	1631	tal
0.246903773437663	MamA	antisense_tal_40_to_stop	normal	1631	tal
0.232933815570956	MamA	sense_tkt_238_to_stop	normal	1632	tkt
0.260126459692391	MamA	antisense_tkt_241_to_stop	normal	1632	tkt
0.619585864214818	MamA	antisense_Rv1461_416_from_start	hypervariable	1649	Rv1461
0.559180595677076	MamA	sense_Rv1461_419_from_start	hypervariable	1652	Rv1461
0.495784790192027	MamA	antisense_Rv1461_472_from_start	hypervariable	1652	Rv1461
0.589351884703104	MamA	sense_Rv1461_475_from_start	hypervariable	1652	Rv1461
0.722096486873617	HsdM	sense_Rv1461_552_from_start	hypervariable	1652	Rv1461
0.673006792577819	HsdM	antisense_Rv1461_559_from_start	hypervariable	1652	Rv1461
0.231928579342601	MamA	antisense_Rv1461_49_to_stop	normal	1654	Rv1461
0.235206131663156	MamA	sense_Rv1461_46_to_stop	normal	1654	Rv1461
0.258928154882613	MamB	antisense_Rv1462_139_from_start	normal	1654	Rv1462
0.26078520670413	MamA	antisense_Rv1462_472_to_stop	normal	1654	Rv1462
0.229855766414623	MamA	sense_Rv1462_469_to_stop	normal	1652	Rv1462
0.287720726342701	MamA	antisense_Rv1462_250_to_stop	normal	1655	Rv1462
0.315770934006224	MamA	sense_Rv1462_247_to_stop	hypervariable	1655	Rv1462
0.26254835123895	MamA	74_up_of_csd	normal	1656	none
0.267913327885606	MamA	71_up_of_csd	normal	1656	none
0.325580154251836	MamA	antisense_Rv1465_13_from_start	hypervariable	1655	Rv1465
0.306919945028147	MamA	sense_Rv1465_16_from_start	normal	1655	Rv1465
0.300442644844024	MamA	sense_fadE15_269_to_stop	normal	1658	fadE15
0.230372732403593	MamA	antisense_fadE15_272_to_stop	normal	1658	fadE15
0.288759073731782	MamA	sense_PE_PGRS29_423_to_stop	normal	1660	PE_PGRS29
0.251962171325606	MamA	antisense_PE_PGRS29_426_to_stop	normal	1660	PE_PGRS29
0.235704587415631	MamA	antisense_moxR1_127_from_start	normal	1673	moxR1
0.249635753976199	MamA	sense_moxR1_130_from_start	normal	1673	moxR1
0.215679364853503	MamA	antisense_Rv1481_157_from_start	normal	1676	Rv1481
0.205489309699571	MamA	sense_Rv1481_160_from_start	normal	1676	Rv1481
0.238690130845787	MamA	antisense_hemZ_70_from_start	normal	1681	hemZ
0.258927083402958	MamA	sense_hemZ_73_from_start	normal	1681	hemZ
0.290075132905342	MamA	antisense_hemZ_193_from_start	normal	1681	hemZ
0.253420159287963	MamA	sense_hemZ_196_from_start	normal	1681	hemZ
0.245208394442451	MamB	antisense_hemZ_314_from_start	normal	1679	hemZ
0.297426115379469	MamA	antisense_hemZ_367_to_stop	normal	1680	hemZ
0.280567598967919	MamA	sense_hemZ_364_to_stop	normal	1680	hemZ
0.215785106229067	MamB	antisense_hemZ_47_to_stop	normal	1682	hemZ
0.309422225597919	MamA	antisense_Rv1487_178_to_stop	normal	1681	Rv1487
0.273699245846215	MamA	sense_Rv1487_175_to_stop	normal	1683	Rv1487
0.258673867133939	MamA	antisense_Rv1488_391_from_start	normal	1683	Rv1488
0.261303938330161	MamA	sense_Rv1488_394_from_start	normal	1683	Rv1488
0.182581447813904	MamB	antisense_Rv1491c_328_to_stop	normal	1686	Rv1491c
0.217452768957085	MamA	antisense_mutB_541_to_stop	normal	1690	mutB
0.273408317602846	MamA	sense_mutB_538_to_stop	normal	1690	mutB
0.209803632207768	MamA	antisense_Rv1496_421_to_stop	normal	1692	Rv1496
0.279759220125496	MamA	sense_Rv1496_418_to_stop	normal	1692	Rv1496
0.290987485097314	MamA	antisense_Rv1496_28_to_stop	normal	1693	Rv1496
0.271016266376032	MamA	sense_Rv1496_25_to_stop	normal	1693	Rv1496
0.296205992904606	HsdM	sense_lipL_260_to_stop	normal	1695	lipL
0.319885725805198	HsdM	antisense_lipL_253_to_stop	hypervariable	1695	lipL
0.233221996242967	MamB	sense_lipL_120_to_stop	normal	1695	lipL
0.240783833845169	MamA	sense_Rv1498A_10_to_stop	normal	1696	Rv1498A
0.259872825421031	MamA	antisense_Rv1498A_13_to_stop	normal	1696	Rv1498A
0.270781095469972	MamA	antisense_Rv1500_49_from_start	normal	1696	Rv1500
0.198683669285762	MamA	sense_Rv1500_52_from_start	normal	1698	Rv1500
0.285109678825	MamA	antisense_Rv1500_142_from_start	normal	1697	Rv1500
0.256285257958969	MamA	sense_Rv1500_145_from_start	normal	1697	Rv1500
0.357282369663237	MamA	antisense_Rv1501_115_to_stop	hypervariable	1697	Rv1501
0.343051020969217	MamA	sense_Rv1501_112_to_stop	hypervariable	1697	Rv1501
0.316089154492228	MamA	antisense_Rv1502_10_to_stop	hypervariable	1699	Rv1502
0.322290080052462	MamA	sense_Rv1502_7_to_stop	hypervariable	1699	Rv1502
0.256911873236252	MamB	antisense_Rv1508c_341_to_stop	normal	1702	Rv1508c
0.243703579936897	HsdM	antisense_Rv1508c_823_to_stop	normal	1704	Rv1508c
0.231750173452152	HsdM	sense_Rv1508c_830_to_stop	normal	1704	Rv1508c
0.290854067159	MamA	sense_Rv1508c_733_from_start	normal	1705	Rv1508c
0.255698191297475	MamA	antisense_Rv1508c_730_from_start	normal	1705	Rv1508c
0.242778583227157	MamB	antisense_Rv1510_283_to_stop	normal	1708	Rv1510
0.289228550672366	MamA	antisense_Rv1510_88_to_stop	normal	1707	Rv1510
0.25456195627463	MamA	sense_Rv1510_85_to_stop	normal	1707	Rv1510
0.281015602008242	MamA	antisense_gmdA_119_to_stop	normal	1709	gmdA
0.228011108180063	MamA	sense_gmdA_116_to_stop	normal	1709	gmdA
0.234602497872359	MamA	antisense_gmdA_55_to_stop	normal	1710	gmdA
0.28444179869053	MamA	sense_gmdA_52_to_stop	normal	1710	gmdA
0.268126903630466	MamA	antisense_epiA_280_from_start	normal	1710	epiA
0.256368896146113	MamA	sense_epiA_283_from_start	normal	1710	epiA
0.372999330890129	MamA	sense_Rv1515c_394_to_stop	hypervariable	1713	Rv1515c
0.295983002910861	MamA	antisense_Rv1515c_397_to_stop	normal	1713	Rv1515c
0.259605557922854	MamA	sense_Rv1515c_442_from_start	normal	1713	Rv1515c
0.262061526221835	MamA	antisense_Rv1515c_439_from_start	normal	1713	Rv1515c
0.252517616259968	MamA	53_down_of_mmpL12	normal	1720	none
0.232602836129083	MamA	50_down_of_mmpL12	normal	1720	none
0.229708557548132	HsdM	antisense_mmpL12_694_to_stop	normal	1720	mmpL12
0.248465138828847	HsdM	sense_mmpL12_701_to_stop	normal	1720	mmpL12
0.225270775950138	MamA	sense_mmpL12_1628_to_stop	normal	1721	mmpL12
0.24805679304954	MamA	antisense_mmpL12_1631_to_stop	normal	1721	mmpL12
0.233413502010259	MamB	sense_mmpL12_340_from_start	normal	1721	mmpL12
0.198187284854783	HsdM	3_up_of_mmpL12	normal	1722	none
0.231973760247908	HsdM	10_up_of_mmpL12	normal	1722	none
0.229530609799387	MamA	antisense_Rv1524_64_from_start	normal	1724	Rv1524
0.242939845644298	MamA	sense_Rv1524_67_from_start	normal	1724	Rv1524
0.223672123621092	MamB	sense_Rv1526c_89_from_start	normal	1726	Rv1526c
0.241772489895255	MamB	antisense_pks5_130_to_stop	normal	1726	pks5
0.244275198770999	MamB	sense_pks5_2547_to_stop	normal	1729	pks5
0.274418190752781	MamA	sense_pks5_1085_from_start	normal	1731	pks5
0.285739603887553	MamA	antisense_pks5_1082_from_start	normal	1731	pks5
0.232910207181849	HsdM	sense_fadD24_301_from_start	normal	1735	fadD24
0.263872226656753	HsdM	antisense_fadD24_308_from_start	normal	1735	fadD24
0.235170154466789	MamB	antisense_adh_193_to_stop	normal	1736	adh
0.200067146156138	MamB	antisense_adh_92_to_stop	normal	1736	adh
0.241962337229712	MamA	antisense_Rv1533_139_from_start	normal	1738	Rv1533
0.237856049103099	MamA	sense_Rv1533_142_from_start	normal	1738	Rv1533
0.245544453010911	MamB	41_up_of_ileS	normal	1741	none
0.286082944611179	MamA	antisense_ileS_1507_from_start	normal	1742	ileS
0.249545658403441	MamA	sense_ileS_1510_from_start	normal	1742	ileS
0.219968096627604	MamA	sense_ansA_265_to_stop	normal	1746	ansA
0.259988020801885	MamA	antisense_ansA_268_to_stop	normal	1746	ansA
0.200314897606833	MamA	sense_ansA_62_from_start	normal	1746	ansA
0.268569328195595	MamA	antisense_ansA_59_from_start	normal	1746	ansA
0.221235630658806	MamB	sense_lprI_205_to_stop	normal	1749	lprI
0.25772096325019	MamB	antisense_lprI_253_from_start	normal	1748	lprI
0.289310726248262	MamA	antisense_dnaE1_1315_to_stop	normal	1755	dnaE1
0.238756956374938	MamA	sense_dnaE1_1312_to_stop	normal	1755	dnaE1
0.244067632772352	MamA	antisense_dnaE1_359_to_stop	normal	1755	dnaE1
0.240487562188823	MamA	sense_dnaE1_356_to_stop	normal	1755	dnaE1
0.183310940708866	HsdM	antisense_PPE21_703_to_stop	normal	1757	PPE21
0.209128274863532	HsdM	sense_PPE21_710_to_stop	normal	1757	PPE21
0.217071084036597	MamB	antisense_plsB1_142_from_start	normal	1760	plsB1
0.244514094814485	MamB	sense_plsB1_319_from_start	normal	1760	plsB1
0.299698577606421	MamA	antisense_frdA_787_from_start	normal	1763	frdA
0.210137026467616	MamA	sense_frdA_790_from_start	normal	1763	frdA
0.206657680519944	MamB	antisense_frdA_614_to_stop	normal	1764	frdA
0.237077396684248	HsdM	sense_frdB_195_from_start	normal	1764	frdB
0.251180069560826	HsdM	antisense_frdB_202_from_start	normal	1764	frdB
0.26274945573964	MamA	antisense_Rv1556_152_to_stop	normal	1766	Rv1556
0.237644449769275	MamA	sense_Rv1556_149_to_stop	normal	1766	Rv1556
0.206195640360797	MamB	sense_treY_665_from_start	normal	1773	treY
0.18713907768687	MamB	antisense_treX_613_to_stop	normal	1779	treX
0.233397455065374	MamA	sense_Rv1566c_262_to_stop	normal	1779	Rv1566c
0.259449727046734	MamA	antisense_Rv1566c_265_to_stop	normal	1779	Rv1566c
0.263217171682461	HsdM	antisense_Rv1566c_226_from_start	normal	1778	Rv1566c
0.263653187973153	HsdM	sense_Rv1566c_219_from_start	normal	1778	Rv1566c
0.271935161627061	MamB	sense_bioA_52_to_stop	normal	1781	bioA
0.263462849781465	MamB	sense_bioF1_16_from_start	normal	1781	bioF1
0.251755656963232	MamB	antisense_Rv1571_198_from_start	normal	1787	Rv1571
0.222497259352395	MamA	antisense_bioB_256_to_stop	normal	1790	bioB
0.34914392569192	MamA	sense_bioB_253_to_stop	hypervariable	1790	bioB
0.285083434882661	MamA	antisense_Rv1590_112_from_start	normal	1791	Rv1590
0.294437889039733	MamA	sense_Rv1590_115_from_start	normal	1791	Rv1590
0.255480272243712	MamA	sense_Rv1592c_484_to_stop	normal	1792	Rv1592c
0.238548083812796	MamA	antisense_Rv1592c_487_to_stop	normal	1792	Rv1592c
0.241392229763969	MamA	antisense_nadB_433_from_start	normal	1792	nadB
0.243247031851043	MamA	sense_nadB_436_from_start	normal	1792	nadB
0.219489789011085	MamB	sense_nadB_68_to_stop	normal	1797	nadB
0.232937756292526	MamB	antisense_hisC1_223_from_start	normal	1800	hisC1
0.308578157504247	MamA	antisense_hisC1_154_to_stop	normal	1801	hisC1
0.271487717952129	MamA	sense_hisC1_151_to_stop	normal	1801	hisC1
0.287620815914534	MamA	antisense_hisF_220_from_start	normal	1804	hisF
0.330652256466457	MamA	sense_hisF_223_from_start	hypervariable	1804	hisF
0.275177367129381	MamB	antisense_hisF_190_to_stop	normal	1805	hisF
0.324796796352985	MamA	sense_bcpB_68_to_stop	hypervariable	1807	bcpB
0.254234211200462	MamA	antisense_bcpB_71_to_stop	normal	1807	bcpB
0.258547513688973	MamA	antisense_trpE_160_from_start	normal	1807	trpE
0.26007532113231	MamA	sense_trpE_163_from_start	normal	1807	trpE
0.243869783143593	MamB	antisense_lgt_679_to_stop	normal	1813	lgt
0.219962089808101	MamB	antisense_lgt_553_to_stop	normal	1813	lgt
0.263268331192935	MamA	antisense_pykA_655_from_start	normal	1816	pykA
0.314791248506982	MamA	sense_pykA_658_from_start	hypervariable	1816	pykA
0.262820624058902	MamA	antisense_Rv1619_454_to_stop	normal	1819	Rv1619
0.251451418467652	MamA	sense_Rv1619_451_to_stop	normal	1819	Rv1619
0.257178014889253	MamA	antisense_Rv1619_31_to_stop	normal	1815	Rv1619
0.216768005715434	MamA	sense_Rv1619_28_to_stop	normal	1815	Rv1619
0.295540483406338	MamA	sense_cydD_628_to_stop	normal	1822	cydD
0.210516668419778	MamA	antisense_cydD_631_to_stop	normal	1822	cydD
0.286236514754382	MamA	sense_cydA_240_from_start	normal	1825	cydA
0.221393162350909	MamA	antisense_cydA_237_from_start	normal	1825	cydA
0.300244077574579	MamA	sense_cya_454_to_stop	normal	1826	cya
0.271267229756417	MamA	antisense_cya_457_to_stop	normal	1826	cya
0.246823583291742	MamB	antisense_cya_604_from_start	normal	1827	cya
0.271598879111001	MamA	sense_cya_490_from_start	normal	1827	cya
0.229684772584051	MamA	antisense_cya_487_from_start	normal	1827	cya
0.192872822923255	MamB	sense_cya_103_from_start	normal	1827	cya
0.276005464669163	MamA	sense_Rv1627c_249_from_start	normal	1829	Rv1627c
0.209938718255957	MamA	antisense_Rv1627c_246_from_start	normal	1829	Rv1627c
0.210293202098963	MamB	antisense_polA_1342_from_start	normal	1831	polA
0.299407826330568	MamA	antisense_polA_49_to_stop	normal	1833	polA
0.296947420662184	MamA	sense_polA_46_to_stop	normal	1833	polA
0.246965267495613	MamA	antisense_rpsA_571_from_start	normal	1833	rpsA
0.283336601202991	MamA	sense_rpsA_574_from_start	normal	1833	rpsA
0.220522432286808	MamA	antisense_rpsA_388_to_stop	normal	1834	rpsA
0.246847165250625	MamA	sense_rpsA_385_to_stop	normal	1834	rpsA
0.211371307401976	MamB	sense_Rv1632c_96_to_stop	normal	1836	Rv1632c
0.244795577280229	MamA	antisense_uvrB_694_to_stop	normal	1838	uvrB
0.23587052005817	MamA	sense_uvrB_691_to_stop	normal	1838	uvrB
0.222988325148418	MamB	sense_Rv1634_627_to_stop	normal	1835	Rv1634
0.227587660284171	HsdM	antisense_Rv1635c_771_to_stop	normal	1841	Rv1635c
0.248821586873559	HsdM	sense_Rv1635c_778_to_stop	normal	1841	Rv1635c
0.228164797492699	MamA	sense_lysX_709_to_stop	normal	1849	lysX
0.241009391855168	MamA	antisense_lysX_712_to_stop	normal	1849	lysX
0.258322007234734	HsdM	antisense_lysX_1002_from_start	normal	1850	lysX
0.235322559399186	HsdM	sense_lysX_995_from_start	normal	1850	lysX
0.210398418172104	MamA	sense_Rv1645c_490_to_stop	normal	1850	Rv1645c
0.217742473530999	MamA	antisense_Rv1645c_493_to_stop	normal	1850	Rv1645c
0.24846074466999	MamA	antisense_PE17_366_from_start	normal	1851	PE17
0.248941578525932	MamA	sense_PE17_369_from_start	normal	1851	PE17
0.23032705176187	HsdM	84_down_of_Rv1648	normal	1853	none
0.233939382388844	HsdM	91_down_of_Rv1648	normal	1853	none
0.246352678129525	MamB	antisense_pheS_241_from_start	normal	1854	pheS
0.262701256960459	MamA	antisense_pheT_835_to_stop	normal	1856	pheT
0.199349274411095	MamA	sense_pheT_832_to_stop	normal	1856	pheT
0.215679339532876	MamA	antisense_pheT_184_to_stop	normal	1858	pheT
0.246751944944742	MamA	sense_pheT_181_to_stop	normal	1858	pheT
0.225689456953576	MamB	antisense_pheT_10_to_stop	normal	1857	pheT
0.228994327188641	MamB	sense_PE_PGRS30_328_from_start	normal	1861	PE_PGRS30
0.23450001023216	MamB	antisense_argB_59_to_stop	normal	1863	argB
0.276041313266956	MamA	antisense_argF_13_to_stop	normal	1866	argF
0.232242492939111	MamA	sense_argF_10_to_stop	normal	1866	argF
0.23416681433342	MamA	antisense_argG_322_to_stop	normal	1867	argG
0.201346624159809	MamA	sense_argG_319_to_stop	normal	1867	argG
0.257307456535783	MamA	antisense_argG_226_to_stop	normal	1867	argG
0.257645444780531	MamA	sense_argG_223_to_stop	normal	1867	argG
0.286080848454096	MamA	antisense_argH_274_from_start	normal	1868	argH
0.239887507605963	MamA	sense_argH_277_from_start	normal	1868	argH
0.283091506061008	MamA	antisense_argH_623_to_stop	normal	1868	argH
0.23825713415479	MamA	sense_argH_620_to_stop	normal	1868	argH
0.247975613852188	MamA	antisense_argH_394_to_stop	normal	1868	argH
0.248201012081915	MamA	sense_argH_391_to_stop	normal	1868	argH
0.243839563488864	MamA	antisense_pks10_166_from_start	normal	1870	pks10
0.261663690332512	MamA	sense_pks10_169_from_start	normal	1870	pks10
0.271623143660605	MamB	antisense_pks10_411_from_start	normal	1869	pks10
0.27574965589556	MamB	antisense_pks10_103_to_stop	normal	1870	pks10
0.371925524094022	MamA	antisense_pks8_295_from_start	hypervariable	1877	pks8
0.334426355275474	MamA	sense_pks8_298_from_start	hypervariable	1877	pks8
0.247433162544374	MamB	antisense_pks9_917_to_stop	normal	1885	pks9
0.540128345274189	MamA	antisense_pks9_328_to_stop	hypervariable	1886	pks9
0.454722101587296	MamA	sense_pks9_325_to_stop	hypervariable	1886	pks9
0.236278952114914	MamB	antisense_cyp139_376_to_stop	normal	1887	cyp139
0.254851350929667	MamA	sense_Rv1667c_22_to_stop	normal	1888	Rv1667c
0.23781568355667	MamA	antisense_Rv1667c_25_to_stop	normal	1888	Rv1667c
0.199706602444432	HsdM	antisense_Rv1668c_817_to_stop	normal	1889	Rv1668c
[truncated: 2,487 more rows]
