# Supplementary material for: Drivers and sites of diversity in the DNA adenine methylomes of 93 Mycobacterium tuberculosis complex clinical isolates
Source: eLife. 2020 Oct 27;9:e58542. doi: 10.7554/eLife.58542 (PMC7591249; doi:10.7554/eLife.58542)
Supplement: Figure 6—source data 1. [file elife-58542-fig6-data1.csv]

TSS_downstream_gene	MTase	count	bp upstream of TSS
Rv0004	MamA	93	-48
Rv0004	MamA	93	-45
gyrB	HsdM	91	-18
gyrB	HsdM	91	-13
no_downstream_cds	MamA	88	-20
no_downstream_cds	MamA	85	-23
Rv0007	MamB	91	-8
Rv0007	HsdM	91	-96
Rv0007	HsdM	91	-89
fhaA	MamB	91	-97
whiB5	HsdM	91	-71
Rv0029	HsdM	91	-12
Rv0039c	MamA	92	-4
Rv0039c	MamA	92	-7
rpsF	MamA	92	-62
rpsF	MamA	92	-59
Rv0061c	HsdM	87	-5
Rv0061c	HsdM	87	-12
Rv0068	MamA	70	-91
Rv0068	MamA	70	-88
no_downstream_cds	HsdM	94	-55
no_downstream_cds	HsdM	93	-62
mtn	MamA	93	-61
mtn	MamA	93	-58
no_downstream_cds	MamA	93	-34
no_downstream_cds	MamA	273	-37
no_downstream_cds	MamA	93	-27
no_downstream_cds	MamA	186	-24
Rv0102	MamA	93	-7
Rv0102	MamA	93	-4
no_downstream_cds	MamA	90	-15
no_downstream_cds	MamA	90	-18
Rv0108c	MamB	92	-42
Rv0108c	MamA	92	-34
Rv0108c	MamA	92	-37
fadD7	MamA	87	-40
fadD7	MamA	87	-37
cyp138	MamA	92	-36
cyp138	MamA	92	-33
Rv0138	MamA	93	-7
Rv0138	MamA	93	-4
Rv0142	MamA	91	-8
Rv0142	MamA	91	-5
Rv0149	MamA	87	-2
pntAa	MamA	92	-83
pntAa	MamA	92	-80
PE4	MamA	89	-5
PE4	MamA	89	-8
Rv0176	MamB	90	-40
lprO	MamB	93	-49
Rv0190	MamB	92	-16
Rv0190	MamA	91	-95
Rv0190	MamA	91	-92
mmpL11	MamA	93	-57
mmpL11	MamA	93	-60
Rv0209	MamB	93	-83
Rv0247c	MamA	87	-15
Rv0247c	MamA	87	-18
Rv0250c	HsdM	93	-5
Rv0250c	HsdM	93	-12
Rv0268c	MamA	93	-88
Rv0268c	MamA	93	-91
vapB25	MamA	91	-52
vapB25	MamA	91	-49
Rv0281	MamA	88	-39
Rv0281	MamA	88	-36
no_downstream_cds	MamA	265	-40
no_downstream_cds	MamA	86	-43
PE_PGRS5	MamA	85	-43
PE_PGRS5	MamA	85	-40
Rv0306	MamA	91	-30
Rv0306	MamA	91	-27
Rv0318c	MamA	86	0
Rv0336	MamA	82	-48
Rv0336	MamA	82	-45
iniA	MamA	90	-35
iniA	MamA	90	-32
ansP2	MamA	86	-43
ansP2	MamA	86	-46
Rv0349	MamA	93	-71
Rv0349	MamA	93	-68
ansP2	MamA	91	-70
ansP2	MamA	91	-73
Rv0358	MamA	86	-53
Rv0358	MamA	86	-50
Rv0365c	MamA	92	-4
Rv0365c	MamA	92	-7
Rv0368c	MamA	92	-52
Rv0368c	MamA	92	-55
Rv0368c	MamA	92	-77
Rv0368c	MamA	92	-80
Rv0368c	MamA	92	-96
pks6	MamA	80	-30
pks6	MamA	80	-27
Rv0443	MamA	89	-83
Rv0443	MamA	89	-80
Rv0446c	MamB	92	0
mmpS4	MamA	93	-56
mmpS4	MamA	93	-7
mazF1	HsdM	93	-9
mazF1	HsdM	93	-16
Rv0465c	MamA	87	-4
Rv0465c	MamA	87	-7
Rv0474	MamB	93	-21
mshA	MamA	74	-78
mshA	MamA	74	-75
Rv0497	MamB	88	-55
Rv0495c	HsdM	89	-97
hemA	MamB	92	-64
fabH	MamB	93	-87
fabH	HsdM	93	-90
fabH	HsdM	93	-97
Rv0565c	MamA	93	-36
Rv0565c	MamA	93	-39
Rv0572c	MamA	91	-54
Rv0572c	MamA	91	-57
lpqN	MamB	93	-96
Rv0585c	MamB	93	-23
no_downstream_cds	MamA	93	-96
vapB28	HsdM	93	-11
vapB28	HsdM	93	-12
echA3	MamA	91	-22
echA3	MamA	91	-25
atsD	MamA	92	-40
atsD	MamA	92	-37
no_downstream_cds	MamA	294	-86
no_downstream_cds	MamA	209	-83
no_downstream_cds	MamA	93	-21
Rv0691A	MamA	86	-7
no_downstream_cds	MamA	83	0
rpmC	HsdM	32	-33
rpmC	HsdM	32	-26
Rv0731c	MamA	90	-93
Rv0731c	MamA	90	-96
Rv0737	MamB	91	-95
Rv0738	MamB	74	-89
mmsB	MamA	85	-3
mmsB	MamA	85	-6
Rv0767c	MamB	89	-20
purB	HsdM	90	-12
purB	HsdM	90	-5
Rv0784	MamA	87	-3
Rv0787A	HsdM	87	-93
Rv0787A	HsdM	87	-86
Rv0799c	MamA	91	-4
Rv0799c	MamA	91	-7
Rv0799c	MamA	91	-58
Rv0799c	MamA	91	-61
cpsY	MamA	86	-73
cpsY	MamA	86	-76
mshD	MamA	92	-56
mshD	MamA	92	-53
mshD	HsdM	92	-13
mshD	HsdM	92	-6
Rv0826	HsdM	87	-13
Rv0826	HsdM	87	-6
Rv0823c	MamA	81	-97
PE_PGRS12	MamA	90	-35
PE_PGRS12	MamA	90	-32
lpqR	MamB	3	-91
Rv0841	HsdM	3	-100
Rv0842	MamA	85	-4
Rv0842	MamA	85	-1
Rv0850	MamB	92	-64
Rv0863	HsdM	78	-19
Rv0863	HsdM	78	-12
ercc3	MamB	61	-64
cspB	MamA	79	-78
cspB	MamA	79	-75
PE_PGRS15	MamA	86	-35
PE_PGRS15	MamA	86	-38
Rv0876c	MamA	91	-56
Rv0876c	MamA	92	-59
citA	MamA	93	-18
citA	MamA	93	-21
Rv0892	MamA	93	-89
Rv0892	MamA	93	-86
Rv0893c	MamA	93	-19
Rv0893c	MamA	93	-22
Rv0898c	MamA	69	-4
Rv0898c	MamA	69	-7
Rv0919	HsdM	93	-27
Rv0919	HsdM	93	-20
pknD	MamA	93	-88
pknD	MamA	93	-91
Rv0942	MamA	93	-40
Rv0942	MamA	93	-37
Rv0942	MamA	93	-28
Rv0942	MamA	93	-25
sucC	MamA	87	-99
Rv0976c	MamA	90	-33
Rv0976c	MamA	90	-36
mprB	MamA	93	-58
mprB	MamA	93	-55
pepD	MamA	93	-41
pepD	MamA	93	-38
mscL	MamB	93	-69
galU	MamB	90	-95
galU	MamB	93	-65
Rv1004c	MamB	82	-45
mfd	MamA	93	-87
mfd	MamA	93	-84
no_downstream_cds	MamA	99	-84
no_downstream_cds	MamA	94	-81
Rv1036c	MamA	92	-29
Rv1036c	MamA	92	-32
Rv1049	MamA	91	-7
Rv1049	MamA	91	-4
Rv1053c	MamA	93	-48
Rv1053c	MamA	93	-51
PE_PGRS20	MamA	74	-20
PE_PGRS20	MamA	74	-23
PE_PGRS21	HsdM	80	-19
PE_PGRS21	HsdM	80	-12
Rv1085c	MamB	55	-43
Rv1089A	MamB	57	-14
glpX	MamA	85	-35
glpX	MamA	85	-38
glpX	HsdM	84	-5
glpX	HsdM	90	-10
Rv1120c	MamA	93	-51
Rv1120c	MamA	93	-54
Rv1149	MamB	91	-94
Rv1149	HsdM	85	-20
Rv1149	HsdM	85	-13
Rv1149	MamB	47	-92
narH	MamA	89	-99
narH	MamA	92	-96
Rv1167c	MamA	93	-67
Rv1167c	MamA	90	-70
PE12	HsdM	93	-12
PE12	HsdM	93	-19
pks3	MamB	93	-58
Rv1188	HsdM	93	-96
Rv1188	HsdM	93	-89
Rv1200	MamA	93	-32
Rv1200	MamA	93	-29
Rv1200	MamA	85	-91
Rv1200	MamA	87	-88
Rv1199c	HsdM	92	-44
Rv1199c	HsdM	92	-51
tagA	MamB	91	-84
Rv1211	MamA	91	-44
Rv1211	MamA	91	-41
sigE	MamA	92	-89
sigE	MamA	92	-86
Rv1219c	HsdM	93	-19
Rv1219c	HsdM	93	-26
Rv1230c	HsdM	93	-4
Rv1230c	HsdM	93	-11
corA	MamA	93	-5
corA	MamA	93	-8
Rv1250	MamA	85	-34
Rv1250	MamA	85	-31
Rv1251c	HsdM	85	-13
Rv1251c	HsdM	85	-20
amiB2	MamA	84	-41
amiB2	MamA	84	-38
amiB2	MamB	84	-65
oppB	MamA	69	-40
oppB	MamA	69	-43
Rv1321	MamB	83	-91
glgB	MamB	85	-59
lprD	HsdM	80	-38
lprD	HsdM	82	-8
Rv1358	MamA	80	-74
Rv1358	MamA	80	-71
Rv1358	MamA	84	-6
Rv1358	MamA	84	-3
no_downstream_cds	MamB	82	-27
Rv1370c	MamA	30	-25
Rv1370c	MamA	30	-22
rpoZ	MamB	93	-5
Rv1404	MamA	93	-80
Rv1404	MamA	93	-77
Rv1424c	MamA	93	-97
PE_PGRS28	MamA	26	-52
PE_PGRS28	MamA	26	-55
Rv1473A	MamA	27	-50
Rv1473A	MamA	27	-47
Rv1482c	MamA	92	-2
Rv1482c	MamA	92	-5
mazE4	MamA	92	-50
mazE4	MamA	92	-47
lipL	MamA	92	-23
lipL	MamA	92	-20
Rv1498A	MamA	90	-90
Rv1498A	MamA	90	-93
Rv1498A	MamA	90	-75
Rv1498A	MamA	90	-78
no_downstream_cds	MamA	92	-97
no_downstream_cds	MamA	182	-94
no_downstream_cds	MamA	87	-38
no_downstream_cds	MamA	87	-35
Rv1523	HsdM	90	-90
Rv1523	HsdM	90	-83
mmpL12	HsdM	91	-4
mmpL12	HsdM	91	-11
no_downstream_cds	HsdM	82	-19
no_downstream_cds	HsdM	241	-12
no_downstream_cds	MamB	185	-80
adh	HsdM	87	-19
adh	HsdM	87	-12
Rv1531	MamB	88	-48
no_downstream_cds	MamA	88	-47
no_downstream_cds	MamA	89	-50
no_downstream_cds	MamA	94	-64
no_downstream_cds	MamA	94	-67
no_downstream_cds	MamB	73	-66
treZ	MamB	90	-92
bioF1	MamB	93	-49
Rv1597	MamA	77	-7
Rv1597	MamA	77	-4
Rv1615	MamB	79	-26
cydC	MamA	79	-50
cydC	MamA	79	-53
Rv1624c	MamA	79	-65
Rv1624c	MamA	79	-68
TB15.3	HsdM	62	-17
TB15.3	HsdM	62	-10
Rv1639c	MamA	74	-35
infC	MamA	78	-15
no_downstream_cds	MamB	91	-84
Rv1678	MamB	86	-57
Rv1692	MamA	93	-95
Rv1692	MamA	93	-92
engA	MamB	92	-80
Rv1725c	MamB	88	-28
Rv1725c	MamA	88	-86
Rv1725c	MamA	88	-89
Rv1732c	MamB	67	-71
Rv1813c	HsdM	93	-4
Rv1813c	HsdM	93	-11
Rv1813c	MamA	92	-68
Rv1813c	MamA	92	-71
Rv1817	MamA	92	-7
Rv1817	MamA	92	-4
Rv1813c	MamA	87	-94
Rv1813c	MamA	87	-97
PE_PGRS33	HsdM	90	-12
PE_PGRS33	HsdM	90	-19
ilvG	MamA	91	-37
ilvG	MamA	91	-34
garA	MamA	91	-82
garA	MamA	91	-79
Rv1871c	MamB	93	-55
Rv1871c	MamA	89	-83
Rv1871c	MamA	89	-86
no_downstream_cds	MamA	88	-74
no_downstream_cds	MamA	160	-77
no_downstream_cds	MamB	76	-42
mpt63	MamA	92	-37
mpt63	MamA	92	-40
ephB	MamA	92	-33
ephB	MamA	92	-30
Rv1944c	HsdM	86	-13
Rv1944c	HsdM	86	-20
higA	MamA	90	-51
higA	MamA	90	-48
mpt64	MamA	86	-68
mpt64	MamA	86	-71
Rv1986	MamA	91	-17
Rv1986	MamA	91	-14
cfp21	MamB	88	-85
Rv2005c	HsdM	92	-79
Rv2005c	HsdM	92	-86
no_downstream_cds	MamA	146	-91
no_downstream_cds	MamA	53	-88
Rv2026c	MamB	86	-94
Rv2044c	MamA	93	-20
Rv2044c	MamA	93	-23
lipT	HsdM	93	-4
lipT	HsdM	93	-11
Rv2050	MamA	93	-51
Rv2050	MamA	93	-48
Rv2078	MamA	88	-92
Rv2078	MamA	88	-89
Rv2077A	MamB	87	-28
Rv2091c	MamA	65	-89
Rv2091c	MamA	65	-92
tatA	MamA	46	-59
tatA	MamA	46	-62
tatA	MamA	44	-72
tatA	MamA	44	-75
pafA	HsdM	88	-12
pafA	HsdM	88	-19
Rv2114	MamA	13	-79
Rv2114	MamA	12	-76
mshC	MamA	93	-28
mshC	MamA	93	-31
Rv2136c	MamA	88	-17
lppL	MamA	88	-15
Rv2144c	MamA	68	-85
Rv2144c	MamA	68	-88
Rv2161c	MamA	89	-93
Rv2161c	MamA	88	-96
Rv2184c	HsdM	85	-56
Rv2184c	HsdM	85	-63
lipB	MamA	93	-87
lipB	MamA	93	-84
vapB16	MamA	89	-95
vapB16	MamA	89	-98
aceE	MamA	93	-62
aceE	MamA	93	-59
Rv2280	MamA	63	-7
Rv2280	MamA	31	-14
Rv2285	MamB	66	-1
lppP	MamA	69	-59
lppP	MamA	69	-62
Rv2348c	HsdM	73	-13
Rv2348c	HsdM	73	-20
glyS	MamA	84	-16
glyS	MamA	84	-19
Rv2360c	MamA	89	-39
Rv2360c	MamA	89	-42
recO	MamA	88	-88
recO	MamA	88	-91
Rv2365c	MamA	89	-69
Rv2365c	MamA	89	-72
dnaJ2	MamB	90	-19
dnaJ2	MamB	90	-82
cfp2	MamB	90	-84
no_downstream_cds	MamA	101	-58
no_downstream_cds	MamA	96	-55
no_downstream_cds	MamA	93	-93
no_downstream_cds	MamA	93	-90
mbtJ	MamA	93	-24
mbtJ	MamA	93	-21
hemN	MamA	75	-88
hemN	MamA	75	-91
Rv2401	MamA	84	-24
Rv2401	MamA	84	-21
lppR	HsdM	92	-69
lppR	HsdM	92	-76
Rv2405	MamA	92	-88
Rv2405	MamA	92	-85
nadD	MamA	93	-16
nadD	MamA	93	-19
no_downstream_cds	MamB	94	-59
rplU	MamA	93	-3
rplU	MamA	93	-6
rplU	MamB	93	-83
Rv2456c	MamA	92	-17
Rv2456c	MamA	92	-20
clpX	HsdM	89	0
Rv2479c	MamA	47	-62
Rv2479c	MamA	47	-59
Rv2499c	MamA	67	-97
scoA	HsdM	67	-49
scoA	HsdM	67	-56
ldtB	HsdM	62	-38
ldtB	HsdM	62	-45
bcp	HsdM	66	-88
bcp	HsdM	66	-81
bcp	MamA	66	-49
bcp	MamA	66	-46
Rv2556c	MamA	91	-3
Rv2556c	MamA	91	-6
Rv2556c	MamA	91	-36
Rv2556c	MamA	91	-39
Rv2565	MamB	91	-35
Rv2573	MamA	88	-99
aspS	MamB	88	-44
yajC	MamB	88	-1
hrp1	MamA	90	-19
hrp1	MamA	90	-22
Rv2628	MamA	85	-4
Rv2628	MamA	85	-1
Rv2631	HsdM	90	-20
Rv2631	HsdM	90	-13
Rv2638	MamA	91	-25
Rv2638	MamA	91	-22
Rv2642	MamA	90	-86
Rv2642	MamA	90	-83
Rv2642	MamA	90	-33
Rv2642	MamA	90	-30
Rv2693c	MamA	92	-53
Rv2693c	MamA	92	-56
ppgK	MamA	91	-54
ppgK	MamA	91	-51
Rv2707	MamA	93	-82
Rv2707	MamA	93	-79
Rv2712c	MamB	90	-86
Rv2721c	MamA	93	-15
Rv2721c	MamA	93	-7
Rv2733c	HsdM	93	-31
Rv2733c	HsdM	93	-38
Rv2733c	MamA	93	-59
Rv2733c	MamA	93	-62
pgsA3	HsdM	90	-41
argA	HsdM	93	-13
Rv2762c	MamA	89	-91
Rv2762c	MamA	89	-94
Rv2775	MamA	91	-38
Rv2775	MamA	91	-35
Rv2775	MamA	92	-67
Rv2775	MamA	92	-64
truB	HsdM	93	-5
truB	HsdM	93	-12
cut1	HsdM	5	-24
cut1	HsdM	5	-31
no_downstream_cds	MamA	66	-6
no_downstream_cds	MamA	66	-3
no_downstream_cds	HsdM	159	-5
Rv2825c	HsdM	93	-5
Rv2825c	HsdM	93	-12
echA16	MamA	93	-92
echA16	MamA	93	-89
rbfA	MamA	93	-63
rbfA	MamA	93	-66
infB	MamA	93	-52
infB	MamA	93	-55
vapB23	MamB	85	-71
dxr	MamA	92	-75
dxr	MamA	92	-78
fdhD	HsdM	89	-81
fdhD	HsdM	89	-88
dacB2	MamA	84	-51
dacB2	MamA	84	-48
no_downstream_cds	MamA	104	-66
no_downstream_cds	MamA	106	-69
drrA	MamA	93	-18
drrA	MamA	93	-15
drrB	MamB	93	-68
no_downstream_cds	MamB	96	-79
no_downstream_cds	MamB	94	-65
no_downstream_cds	MamB	93	-83
Rv2943	HsdM	87	-62
Rv2943	HsdM	87	-55
pks15	MamA	93	-89
pks15	MamA	93	-92
pks15	MamA	93	-46
pks15	MamA	93	-49
Rv2953	MamB	77	-90
Rv2969c	HsdM	89	-5
Rv2991	MamA	78	-89
Rv2991	MamA	78	-86
Rv2997	MamA	78	-87
Rv2997	MamA	78	-84
PPE47	HsdM	3	-31
PPE47	HsdM	3	-24
no_downstream_cds	MamA	95	-89
Rv3047c	MamA	92	-27
Rv3047c	MamA	92	-30
Rv3058c	MamA	86	-39
Rv3058c	MamA	86	-42
pgmA	MamB	92	-73
Rv3083	MamA	87	-7
virS	MamA	81	-66
Rv3104c	MamA	87	-82
Rv3104c	MamA	87	-85
PPE49	HsdM	81	-88
Rv3127	HsdM	84	-13
PPE50	MamB	43	-82
PPE50	MamA	43	-49
PPE50	MamA	43	-46
PPE50	MamA	43	-68
PPE50	MamA	43	-65
tgs1	MamA	81	-28
tgs1	MamA	81	-31
Rv3142c	MamA	92	-57
Rv3142c	MamA	92	-60
Rv3190A	MamA	10	-46
Rv3190A	MamA	9	-43
Rv3192	MamA	78	-90
Rv3192	MamA	78	-87
whiB7	MamA	93	-5
whiB7	MamA	93	-8
Rv3202c	MamA	93	-40
Rv3202c	MamA	90	-43
Rv3208	MamA	87	-41
Rv3208	MamA	87	-38
rhlE	MamA	90	-99
rhlE	MamA	93	-96
sigH	MamA	91	-84
sigH	MamA	91	-87
desA3	MamB	90	-69
Rv3231c	MamA	87	-58
Rv3231c	MamA	87	-61
tgs3	MamB	90	-18
mtrB	MamA	89	-94
mtrB	MamA	89	-97
sahH	MamA	89	-89
sahH	MamA	89	-92
rubA	MamA	89	-40
rubA	MamA	89	-43
rubA	MamA	89	-12
rubA	MamA	88	-15
whiB2	MamB	88	-83
birA	MamA	43	-39
birA	MamA	43	-42
Rv3284	HsdM	47	-19
Rv3284	HsdM	47	-12
pcd	MamA	51	-73
pcd	MamA	51	-70
Rv3312c	HsdM	78	-13
Rv3312c	HsdM	78	-20
Rv3312A	HsdM	78	-4
Rv3312A	HsdM	78	-11
trpS	MamA	93	-43
trpS	MamA	93	-46
icd1	MamA	87	-25
icd1	MamA	87	-28
no_downstream_cds	MamA	121	-49
no_downstream_cds	MamA	122	-46
Rv3378c	MamA	60	-4
Rv3378c	MamA	60	-7
Rv3378c	MamB	60	-34
dxs2	HsdM	10	-93
vapB46	MamB	56	-47
htdY	MamB	75	-43
htdY	MamB	75	-51
acrA1	MamA	76	-87
acrA1	MamA	75	-84
rplM	MamB	79	-33
PE31	HsdM	88	-48
PE31	HsdM	88	-41
bpoA	MamA	79	-88
bpoA	MamA	79	-91
Rv3481c	HsdM	3	-3
Rv3484	HsdM	3	-13
fdxD	MamA	91	-5
fdxD	MamA	91	-8
PE_PGRS53	HsdM	92	-19
PE_PGRS53	HsdM	92	-12
PE_PGRS57	MamA	77	-69
PE_PGRS57	MamA	77	-66
echA19	MamA	89	-7
echA19	MamA	89	-4
Rv3528c	MamA	90	-98
Rv3549c	MamA	86	-56
Rv3549c	MamA	86	-59
kstR	MamA	91	-72
kstR	MamA	91	-69
Rv3583c	MamA	92	-5
Rv3583c	MamA	92	-8
no_downstream_cds	MamB	85	-20
no_downstream_cds	MamA	84	-99
PE_PGRS60	MamA	68	-3
Rv3683	MamB	91	-7
Rv3688c	MamA	85	-38
Rv3688c	MamA	85	-41
egtC	MamA	91	-90
egtC	MamA	91	-93
asd	MamB	85	-33
Rv3720	MamA	90	-99
Rv3720	MamA	90	-96
Rv3718c	MamA	87	-98
Rv3722c	HsdM	91	-58
Rv3722c	HsdM	91	-65
Rv3728	MamA	93	-7
Rv3728	MamA	93	-4
no_downstream_cds	MamB	87	-33
Rv3735	MamA	93	-54
Rv3735	MamA	93	-51
Rv3750c	MamA	93	-61
Rv3750c	MamA	93	-64
lpqH	MamA	87	-97
lpqH	MamA	87	-94
tcrY	MamA	93	-38
tcrY	MamA	93	-41
Rv3779	MamA	93	-7
Rv3779	MamA	93	-4
Rv3780	HsdM	93	-11
Rv3778c	HsdM	93	-44
Rv3788	MamB	86	-51
Rv3789	MamA	92	-93
Rv3789	MamA	92	-90
Rv3787c	MamB	92	-86
Rv3796	HsdM	93	-66
Rv3796	HsdM	93	-59
aftB	MamB	92	-84
glf	HsdM	92	-4
glf	HsdM	92	-11
PE_PGRS62	MamA	93	-2
PE_PGRS62	MamA	87	-38
glf	MamA	93	-27
glf	MamA	93	-30
Rv3829c	MamA	93	-1
Rv3829c	MamA	35	-94
Rv3829c	MamA	35	-97
Rv3844	MamA	76	-51
Rv3844	MamA	76	-48
gltD	MamA	91	-74
gltD	MamA	91	-77
gltB	MamB	90	-39
PE35	MamA	68	-48
PE35	MamA	67	-45
PE36	MamA	93	-4
PE36	MamA	93	-7
no_downstream_cds	HsdM	74	-11
Rv3898c	HsdM	74	-67
sigM	MamA	78	-2
no_downstream_cds	MamA	80	-80
Rv3916c	MamA	72	-53
Rv3916c	MamA	73	-56
Rv0075	HsdM	8	-100
mkl	MamB	56	-1
mmsB	MamA	7	-4
mmsB	MamA	7	-7
Rv0794c	HsdM	27	-24
Rv0794c	HsdM	27	-31
Rv0898c	MamA	24	-3
Rv0898c	MamA	24	-6
Rv1149	MamB	40	-91
Rv1186c	MamA	3	-92
Rv1186c	MamA	2	-95
Rv1772	HsdM	77	-54
Rv1772	HsdM	77	-47
Rv1779c	MamA	87	-15
Rv1779c	MamA	87	-18
no_downstream_cds	MamA	105	-4
no_downstream_cds	MamA	106	-7
PPE25	MamA	90	-33
PPE25	MamA	90	-30
PPE25	HsdM	90	-22
PPE25	HsdM	90	-15
eccA5	MamB	90	-72
no_downstream_cds	HsdM	89	-8
no_downstream_cds	HsdM	90	-15
gnd1	HsdM	7	-87
gnd1	HsdM	7	-94
glnA3	HsdM	89	-10
glnA3	HsdM	89	-3
Rv2144c	MamA	24	-86
Rv2144c	MamA	24	-89
Rv2172c	MamA	51	-89
Rv2172c	MamA	51	-92
Rv2172c	MamB	43	-33
Rv2280	MamA	32	-4
Rv2305	MamA	79	-55
Rv2305	MamA	79	-52
Rv2305	MamA	88	-17
Rv2305	MamA	88	-14
Rv2315c	MamA	88	-19
Rv2315c	MamA	88	-22
Rv2401	MamA	8	-23
Rv2401	MamA	8	-20
Rv2434c	MamA	24	-49
Rv2434c	MamA	24	-52
rbsK	MamB	24	-45
Rv3126c	MamB	23	-58
Rv3179	HsdM	10	-49
Rv3179	HsdM	10	-43
Rv3179	HsdM	10	-42
Rv3179	HsdM	10	-36
Rv3381c	HsdM	20	-95
vapB46	MamB	27	-48
Rv3481c	HsdM	90	-4
Rv3484	HsdM	90	-12
espC	MamA	65	-51
espC	MamA	65	-54
espC	MamA	65	-98
ephA	MamA	63	-27
espC	HsdM	65	-28
espC	HsdM	65	-35
espA	MamA	64	-29
espA	MamA	64	-32
lpqG	HsdM	70	-100
lpqG	HsdM	70	-93
hpt	MamA	70	-74
hpt	MamA	70	-77
Rv3627c	MamA	72	-63
Rv3627c	MamA	72	-66
Rv3636	MamA	65	-35
Rv3636	MamA	65	-32
Rv3642c	HsdM	75	-78
Rv3642c	HsdM	75	-85
Rv3657c	MamA	89	-93
Rv3657c	MamA	89	-96
dnaN	MamA	1	-21
dnaN	MamA	1	-18
Rv0036c	MamB	3	-82
Rv1085c	MamB	5	-34
Rv1473A	HsdM	63	-100
Rv1473A	HsdM	66	-93
moxR1	MamA	70	-85
moxR1	MamA	70	-82
fadD25	MamA	6	-87
fadD25	MamA	6	-84
fadD25	MamB	6	-21
gabD2	MamA	5	-33
gabD2	MamA	5	-30
Rv1755c	HsdM	4	-31
Rv1755c	HsdM	4	-38
Rv2015c	MamB	63	-72
pafC	MamA	3	-4
pafC	MamA	3	-7
Rv2118c	MamA	5	-59
Rv2118c	MamA	5	-62
lppL	MamA	5	-2
Rv2280	MamA	3	-3
Rv2279	MamB	3	-83
pitB	MamA	16	-7
pitB	MamA	12	-14
no_downstream_cds	MamA	44	-62
no_downstream_cds	MamA	39	-59
no_downstream_cds	MamA	1	-2
no_downstream_cds	HsdM	16	-13
no_downstream_cds	HsdM	18	-6
lpqG	HsdM	1	-81
lpqG	HsdM	1	-74
hpt	MamA	1	-24
hpt	MamA	1	-27
Rv3829c	MamA	58	-93
Rv3829c	MamA	58	-96
Rv1186c	MamA	14	-91
Rv1186c	MamA	14	-94
Rv1358	MamA	4	-11
Rv1358	MamA	4	-8
pcd	MamA	1	-74
pcd	MamA	1	-71
mak	HsdM	12	-100
mak	HsdM	12	-93
PPE5	HsdM	1	-5
PPE5	HsdM	1	-12
tatA	MamA	22	-4
tatA	MamA	22	-7
Rv2277c	MamA	4	0
Rv2277c	MamA	5	-84
Rv2277c	MamA	5	-87
Rv2277c	MamB	9	-83
Rv2817c	MamA	1	-69
Rv2817c	MamA	1	-72
Rv2818c	HsdM	1	-65
Rv2818c	HsdM	1	-72
PE_PGRS60	MamA	3	-2
no_downstream_cds	MamA	3	-51
no_downstream_cds	MamA	5	-48
atsD	MamB	19	-55
phoP	HsdM	5	-66
phoP	HsdM	5	-59
phoP	MamA	5	-99
vapB37	HsdM	43	-15
vapB37	HsdM	43	-22
Rv3126c	HsdM	6	-96
Rv3126c	HsdM	6	-48
no_downstream_cds	MamA	3	-17
devS	MamA	2	-28
devS	MamA	2	-31
Rv3354	MamA	1	-49
Rv3354	MamA	1	-46
Rv3475	MamA	8	-88
Rv3475	MamA	8	-91
cyp138	MamA	1	-34
cyp138	MamA	1	-31
Rv0296c	MamB	17	-21
rplW	MamB	15	-33
PE_PGRS19	MamA	19	-20
PE_PGRS19	MamA	19	-23
rho	MamA	32	-88
rho	MamA	32	-85
rpmE	MamB	32	-59
rpmE	MamB	32	-47
Rv1760	MamB	36	-29
dop	MamA	43	-46
dop	MamA	43	-49
hemN	MamA	14	-34
hemN	MamA	14	-37
sirA	MamB	13	-2
Rv2775	MamA	1	-68
Rv2775	MamA	1	-65
no_downstream_cds	HsdM	17	-31
no_downstream_cds	HsdM	17	-24
no_downstream_cds	MamA	2	-78
no_downstream_cds	MamA	1	-75
Rv2953	MamB	16	-89
no_downstream_cds	MamB	21	-82
PPE51	MamA	18	-68
PPE51	MamA	18	-65
PE35	MamA	1	-51
no_downstream_cds	HsdM	17	-10
Rv3898c	HsdM	17	-68
vapB25	MamA	2	-51
vapB25	MamA	2	-48
cspB	MamA	5	-79
cspB	MamA	5	-76
PE_PGRS21	MamB	1	-90
gabD2	MamA	19	-90
gabD2	MamA	19	-87
Rv2456c	MamA	1	-98
lipM	MamA	2	-36
lipM	MamA	2	-33
Rv2813	MamA	1	-90
Rv2813	MamA	1	-87
Rv2277c	HsdM	18	-31
Rv2277c	HsdM	18	-24
espC	MamA	11	-28
espC	MamA	11	-31
Rv2113	MamA	4	-8
Rv2113	MamA	4	-5
dop	MamA	5	-93
dop	MamA	4	-96
mpa	MamB	3	-36
Rv2184c	HsdM	4	-55
Rv2184c	HsdM	4	-62
Rv2434c	HsdM	4	-78
Rv2434c	HsdM	4	-85
Rv2437	MamB	4	-58
Rv3192	MamA	1	-89
Rv3192	MamA	1	-86
ethA	MamA	3	-83
ethA	MamA	3	-86
no_downstream_cds	MamA	2	-70
no_downstream_cds	MamA	2	-73
Rv0680c	HsdM	3	-3
Rv0680c	HsdM	3	-10
PPE12	HsdM	2	-8
PPE12	HsdM	2	-17
Rv0756c	MamA	2	-39
Rv0756c	MamA	2	-42
Rv0823c	MamA	6	-86
Rv0823c	MamA	6	-89
adh	HsdM	4	-20
adh	HsdM	4	-13
Rv1531	MamB	4	-49
Rv1597	MamA	2	-9
Rv1597	MamA	2	-6
Rv1670	HsdM	3	-96
Rv1670	HsdM	3	-89
vapB12	MamA	1	-91
vapB12	MamA	1	-94
Rv1763	MamB	1	-43
Rv1887	MamB	5	-42
Rv1951c	HsdM	1	-77
Rv1951c	HsdM	1	-84
parD1	HsdM	1	-48
parD1	HsdM	1	-55
Rv2799	MamB	2	-38
Rv2292c	MamB	2	-4
Rv2802c	MamA	2	-66
Rv2802c	MamA	2	-69
Rv2813	MamA	2	-19
Rv2813	MamA	2	-16
Rv2280	MamA	2	-52
Rv2280	MamA	2	-49
rnc	MamA	2	-29
rnc	MamA	2	-32
Rv2927c	MamA	2	-26
Rv2927c	MamA	2	-29
Rv3126c	HsdM	1	-91
Rv3126c	HsdM	1	-98
PPE53	MamA	17	-48
PPE53	MamA	17	-51
Rv3160c	MamA	16	-13
Rv3160c	MamA	16	-76
Rv3173c	HsdM	16	-64
Rv3173c	HsdM	16	-71
mesT	HsdM	16	-93
mesT	HsdM	16	-58
mesT	HsdM	16	-59
mesT	HsdM	16	-12
pyrR	MamA	1	-51
pyrR	MamA	1	-48
Rv1760	MamB	1	-28
PE_PGRS32	HsdM	1	-8
PE_PGRS32	HsdM	1	-15
no_downstream_cds	MamA	1	-10
Rv3090	MamA	1	-2
Rv3090	MamA	1	-83
Rv3327	HsdM	1	-93
Rv3327	HsdM	1	-86
no_downstream_cds	HsdM	1	-92
whiB5	MamB	1	-56
Rv1186c	MamA	1	-89
clpX	MamA	1	-80
clpX	MamA	1	-83
Rv2859c	MamA	1	-49
Rv2859c	MamA	1	-52
Rv0190	MamA	2	-96
Rv0190	MamA	2	-93
Rv0443	MamA	4	-82
Rv0443	MamA	4	-79
lipG	MamA	5	-91
lipG	MamA	5	-94
rplW	MamB	5	-87
Rv0738	MamB	18	-90
gmdA	MamA	1	-59
gmdA	MamA	1	-56
Rv1914c	MamA	3	-78
Rv1914c	MamA	3	-81
tatA	MamA	14	-2
tatA	MamA	14	-5
tatA	MamA	14	-15
tatA	MamA	14	-18
hemN	MamA	2	-87
hemN	MamA	2	-90
no_downstream_cds	HsdM	4	-65
no_downstream_cds	HsdM	4	-58
atsD	MamB	1	-35
Rv3083	MamA	1	-8
Rv3083	MamA	1	-5
Rv1813c	MamA	4	-17
Rv1813c	MamA	4	-20
PPE34	HsdM	2	-54
PPE34	HsdM	2	-61
Rv2808	HsdM	1	-4
no_downstream_cds	MamA	8	-13
no_downstream_cds	MamA	9	-16
thiX	MamA	1	-38
thiX	MamA	1	-41
mshD	MamA	1	-64
mshD	MamA	1	-61
coaA	MamA	1	-79
coaA	MamA	1	-82
Rv2005c	HsdM	1	-78
Rv2005c	HsdM	1	-85
no_downstream_cds	MamA	2	-19
Rv2172c	MamA	1	-88
Rv2172c	MamA	1	-91
Rv3083	MamA	1	-6
virS	MamA	1	-67
dop	MamA	2	-47
dop	MamA	2	-50
rpmC	HsdM	5	-87
rpmC	HsdM	5	-80
no_downstream_cds	HsdM	1	-98
kgtP	MamA	3	-45
kgtP	MamA	3	-48
gyrA	HsdM	6	-56
gyrA	HsdM	6	-49
gyrA	MamA	6	-41
gyrA	MamA	6	-38
Rv0061c	HsdM	6	-4
Rv0061c	HsdM	6	-11
Rv0102	MamA	6	-71
Rv0102	MamA	6	-68
fadD7	MamA	6	-41
fadD7	MamA	6	-38
Rv0138	MamA	6	-97
Rv0138	MamA	6	-94
Rv0157A	HsdM	6	-39
Rv0157A	HsdM	6	-46
Rv0247c	MamA	6	-21
Rv0247c	MamA	6	-24
Rv0349	MamA	6	-99
Rv0349	MamA	6	-96
no_downstream_cds	MamA	7	-42
no_downstream_cds	MamA	8	-45
Rv0356c	MamA	6	-10
Rv0356c	MamA	6	-13
fadE7	MamA	5	-48
fadE7	MamA	5	-51
pks6	MamA	6	-9
pks6	MamA	6	-6
ufaA1	MamB	6	-42
Rv0458	MamA	6	-45
Rv0458	MamA	6	-42
Rv0500A	MamA	5	-53
Rv0500A	MamA	5	-50
no_downstream_cds	MamB	6	-47
Rv0691A	MamA	6	-3
Rv0691A	MamA	9	-4
Rv0699	HsdM	6	-28
Rv0699	HsdM	6	-21
Rv0731c	MamA	1	0
Rv0731c	MamA	1	-3
Rv0737	MamB	1	-41
Rv0738	MamB	1	-35
Rv0741	MamA	6	-43
Rv0741	MamA	6	-40
Rv0767c	MamB	3	-19
purB	HsdM	3	-13
purB	HsdM	3	-6
Rv0779c	MamA	6	-35
Rv0779c	MamA	6	-38
Rv0787A	HsdM	6	-74
Rv0787A	HsdM	6	-67
lpqS	HsdM	5	-13
lpqS	HsdM	5	-6
rpfA	HsdM	4	-23
rpfA	HsdM	4	-30
Rv0944	MamA	6	-12
Rv0944	MamA	6	-9
fadE12	MamA	6	-87
fadE12	MamA	6	-90
PE_PGRS17	MamB	5	-31
Rv0999	HsdM	6	-26
Rv0999	HsdM	6	-19
no_downstream_cds	HsdM	12	-41
no_downstream_cds	HsdM	7	-48
prsA	MamA	6	-11
prsA	MamA	6	-14
no_downstream_cds	MamB	8	-85
Rv1230c	MamB	6	-15
deaD	MamA	6	-34
deaD	MamA	6	-31
Rv1376	MamA	6	-29
Rv1376	MamA	6	-26
Rv1435c	MamB	4	-51
Rv1478	MamA	6	-75
Rv1478	MamA	6	-72
pks10	MamA	6	-53
pks10	MamA	6	-50
cmk	HsdM	6	-70
cmk	HsdM	6	-63
Rv1907c	MamA	6	-13
Rv1907c	MamA	6	-16
Rv1947	MamA	6	-62
Rv1947	MamA	6	-59
mazE6	MamA	6	-2
mazE6	MamA	6	-5
Rv2023c	MamB	2	-1
no_downstream_cds	MamA	6	-87
PE_PGRS38	MamB	3	-32
Rv2179c	MamA	3	-93
Rv2179c	MamA	3	-96
TB16.3	MamA	3	-96
Rv2186c	MamA	3	-98
Rv2191	MamB	3	-29
Rv2191	MamA	3	-84
Rv2191	MamA	3	-81
Rv2190c	MamA	3	-55
Rv2190c	MamA	3	-58
trpD	MamA	3	-90
trpD	MamA	3	-93
no_downstream_cds	MamA	6	-65
yjcE	MamA	3	-43
yjcE	MamA	3	-40
Rv2307D	MamB	6	-36
Rv2326c	MamB	6	-84
rpfD	MamB	4	-52
Rv2402	MamB	6	-8
Rv2434c	MamB	6	-34
accD1	MamA	4	-42
accD1	MamA	4	-45
Rv2508c	MamA	4	-44
Rv2508c	MamA	4	-47
Rv2567	MamA	6	-90
Rv2567	MamA	6	-87
Rv2609c	MamA	6	-84
Rv2609c	MamA	6	-87
pimA	MamA	6	-33
pimA	MamA	6	-36
hrp1	MamA	5	-1
hrp1	MamA	6	-23
hrp1	MamA	6	-26
Rv2704	MamB	6	-6
Rv2707	HsdM	6	-91
Rv2707	HsdM	6	-84
argA	MamA	6	-36
argA	MamA	6	-33
PPE44	MamA	6	-52
PPE44	MamA	6	-55
sirR	HsdM	5	-63
sirR	HsdM	5	-56
Rv2805	MamA	5	-22
Rv2805	MamA	5	-19
pitB	MamA	1	-51
pitB	MamA	1	-48
Rv2815c	HsdM	1	-50
Rv2815c	HsdM	1	-57
Rv2859c	MamA	5	-93
Rv2859c	MamA	5	-96
Rv2943	HsdM	6	-45
Rv2943	HsdM	6	-38
Rv2955c	MamA	1	-96
Rv2966c	MamA	1	-19
Rv2966c	MamA	1	-22
Rv2969c	HsdM	1	-1
Rv2969c	HsdM	1	-6
Rv2997	MamA	5	-20
Rv2997	MamA	5	-17
Rv3126c	HsdM	1	-69
Rv3126c	HsdM	1	-76
Rv3188	MamA	1	-62
Rv3188	MamA	1	-59
Rv3222c	MamA	5	-38
Rv3222c	MamA	5	-41
manB	MamA	4	-80
manB	MamA	4	-83
Rv3312A	MamA	1	-4
Rv3312A	MamA	1	-7
echA18	MamA	6	-46
echA18	MamA	6	-43
Rv3528c	MamA	1	-97
fadA6	MamA	6	-66
fadA6	MamA	6	-69
hsaB	MamA	6	-1
hsaB	MamA	6	-4
asd	MamB	6	-15
Rv3785	MamB	6	-10
Rv3786c	MamB	6	-74
PE_PGRS62	MamA	6	-21
papA2	MamB	6	-39
gltB	MamA	6	-7
gltB	MamA	6	-10
no_downstream_cds	MamA	6	-79
no_downstream_cds	MamA	1	-76
Rv3916c	MamA	1	-59
aldA	HsdM	3	-37
aldA	HsdM	3	-30
Rv1986	MamA	1	-18
Rv1986	MamA	1	-15
Rv0043c	HsdM	7	-40
Rv0043c	HsdM	7	-47
PE_PGRS21	HsdM	6	-18
PE_PGRS21	HsdM	6	-11
desA2	MamA	8	-16
desA2	MamA	8	-13
Rv1505c	HsdM	7	-89
Rv1505c	HsdM	7	-96
TB15.3	HsdM	10	-74
TB15.3	HsdM	10	-67
no_downstream_cds	HsdM	6	-74
no_downstream_cds	HsdM	6	-67
dosT	MamA	7	-70
dosT	MamA	7	-73
PE_PGRS36	MamA	5	-18
PE_PGRS36	MamA	5	-15
no_downstream_cds	HsdM	18	-75
no_downstream_cds	HsdM	18	-68
Rv2813	MamA	7	-53
Rv2813	MamA	7	-50
Rv3191c	MamA	13	-28
Rv3191c	MamA	13	-31
PE35	MamA	7	-47
PE35	MamA	7	-44
fadD30	MamA	3	-77
fadD30	MamA	3	-74
fdxD	MamA	2	-6
fdxD	MamA	2	-9
PE_PGRS53	HsdM	1	-18
PE_PGRS53	HsdM	1	-11
gltD	MamA	2	-75
gltD	MamA	2	-78
gltB	MamB	3	-40
PE_PGRS36	MamA	2	-19
PE_PGRS36	MamA	2	-16
Rv1914c	MamA	1	-35
Rv1914c	MamA	1	-38
Rv1914c	MamB	1	-97
udgA	MamA	5	-3
ansP2	MamA	5	-42
ansP2	MamA	5	-45
Rv1435c	MamB	1	-52
Rv2182c	MamA	5	-89
Rv2182c	MamA	5	-92
Rv2285	MamA	1	-22
Rv2285	MamA	1	-19
Rv2278	HsdM	2	-50
Rv2278	HsdM	2	-57
Rv2955c	MamA	5	-95
Rv2955c	MamA	5	-98
Rv2966c	MamA	5	-18
Rv2966c	MamA	5	-21
gcp	MamA	4	-68
gcp	MamA	4	-71
no_downstream_cds	MamA	5	-82
Rv3231c	MamA	3	-59
Rv3231c	MamA	3	-56
lipV	MamA	3	-4
PPE50	MamA	3	0
PPE50	MamA	3	-3
Rv3127	HsdM	3	-20
Rv3104c	MamA	6	-83
Rv3104c	MamA	6	-80
Rv3083	MamA	6	-4
Rv3049c	MamB	6	-100
Rv1765c	MamB	2	-43
Rv2665	MamB	3	-55
Rv2665	MamA	3	-25
Rv2665	MamA	3	-22
esxR	MamA	2	-33
esxR	MamA	2	-36
esxR	MamB	2	-95
glpX	HsdM	6	-3
Rv1104	MamA	6	-18
Rv1104	MamA	6	-21
Rv1089A	MamB	3	-15
Rv1006	MamB	6	-36
PE_PGRS15	MamA	3	-36
PE_PGRS15	MamA	3	-33
Rv0823c	MamA	3	-99
Rv0823c	MamA	3	-96
Rv0794c	HsdM	3	-30
Rv0794c	HsdM	3	-23
Rv0784	MamA	3	0
Rv0520	MamB	10	-78
Rv0519c	MamB	10	-70
gabP	MamB	10	-78
Rv0696	HsdM	1	-94
Rv1081c	MamB	4	-60
PE_PGRS21	HsdM	4	-64
PE_PGRS21	HsdM	4	-57
Rv1360	MamA	3	-84
Rv1360	MamA	3	-81
Rv1676	MamB	4	-11
Rv1756c	MamA	1	-27
Rv1756c	MamA	1	-24
Rv1772	MamB	1	-33
Rv1776c	MamA	1	-66
Rv1776c	MamA	1	-69
pafC	MamB	13	-14
Rv2114	MamB	3	-41
fdhD	HsdM	4	-2
trmD	MamA	4	-22
trmD	MamA	4	-25
Rv3916c	MamA	2	-52
Rv3916c	MamA	2	-55
Rv0142	MamA	1	-95
Rv0142	MamA	1	-92
Rv0520	MamB	4	-79
Rv0519c	MamB	4	-69
gabP	MamB	4	-79
engA	MamB	1	-79
ctpF	MamA	6	-100
dop	MamA	1	-33
dop	MamA	1	-36
mmpL9	HsdM	1	-62
mmpL9	HsdM	1	-55
mtc28	MamA	1	-4
mtc28	MamA	1	-7
pks6	MamA	2	-29
pks6	MamA	2	-26
PE_PGRS21	MamB	1	-78
PE26	HsdM	4	-13
PE26	HsdM	4	-20
Rv2499c	MamA	4	-100
Rv2298	MamA	1	-46
Rv2298	MamA	1	-49
sseB	MamB	1	-11
Rv2288	MamA	1	-31
Rv2288	MamA	1	-34
Rv2288	MamB	1	-93
pitB	MamA	4	-4
Rv2161c	MamA	1	-90
Rv2136c	MamA	4	-9
Rv2136c	MamA	4	-6
Rv1986	MamB	4	-30
mpt64	MamA	6	-69
mpt64	MamA	4	-66
Rv1871c	MamA	4	-14
Rv1871c	MamA	4	-11
vapB12	MamA	4	-100
infC	MamA	4	-18
Rv2635	HsdM	1	-20
Rv2635	HsdM	1	-13
idsA2	HsdM	1	-74
idsA2	HsdM	1	-81
Rv2177c	MamA	1	-46
Rv2177c	MamA	1	-43
Rv2993c	MamB	1	-84
Rv0807	MamA	1	-31
Rv0807	MamA	1	-28
Rv1951c	HsdM	1	-89
Rv1951c	HsdM	1	-96
Rv2078	MamA	2	-91
Rv2078	MamA	2	-88
Rv3657c	MamA	1	-94
Rv3657c	MamA	1	-97
narL	MamB	3	-70
Rv0870c	MamA	2	-98
metE	MamB	2	-37
Rv1144	MamB	2	-73
no_downstream_cds	MamB	2	-2
Rv1676	MamB	1	-68
trpD	HsdM	1	-47
trpD	HsdM	1	-54
Rv2280	MamA	5	-58
Rv2280	MamA	5	-55
cut2	MamA	2	-55
cut2	MamA	2	-52
PPE38	MamA	1	-80
PPE38	MamA	1	-83
Rv2480c	MamA	4	-12
Rv2480c	MamA	4	-9
Rv3180c	MamB	15	-47
rubA	MamA	2	-53
rubA	MamA	2	-56
rubA	MamA	2	-25
rubA	MamA	2	-28
whiB2	MamB	2	-96
no_downstream_cds	MamA	1	-39
Rv1765A	MamB	1	-20
Rv3361c	MamB	2	-47
dnaN	MamA	1	-9
dnaN	MamA	1	-6
Rv0190	MamB	1	-17
Rv0299	MamB	4	-16
fadE7	HsdM	1	-57
fadE7	HsdM	1	-64
no_downstream_cds	MamA	2	-54
no_downstream_cds	MamA	2	-57
no_downstream_cds	MamA	3	-95
no_downstream_cds	MamA	3	-98
Rv0870c	MamB	1	-27
Rv1006	MamB	4	-49
mmpL12	HsdM	1	-24
mmpL12	HsdM	1	-31
PPE38	MamA	10	-13
PPE38	MamA	10	-16
htdY	MamB	1	-94
acrA1	MamA	1	-36
acrA1	MamA	1	-33
mak	HsdM	1	-19
mak	HsdM	1	-12
no_downstream_cds	MamA	2	-92
no_downstream_cds	HsdM	1	-76
no_downstream_cds	HsdM	1	-69
acrA1	MamA	10	-9
acrA1	MamA	10	-6
mak	HsdM	1	-1
Rv1678	MamB	1	-56
no_downstream_cds	MamB	1	-73
lppQ	MamA	1	-96
lppQ	MamA	1	-93
no_downstream_cds	MamA	1	-56
Rv3474	HsdM	2	-48
Rv3474	HsdM	2	-41
Rv3612c	MamA	4	-29
Rv3612c	MamA	4	-32
Rv0836c	HsdM	3	-81
Rv0836c	HsdM	3	-74
no_downstream_cds	HsdM	3	-70
no_downstream_cds	HsdM	3	-63
sirR	HsdM	1	-55
sirR	HsdM	1	-62
dfrA	MamA	3	-39
dfrA	MamA	3	-36
argA	HsdM	3	-20
Rv2712c	MamB	3	-20
fadD9	MamB	1	-1
Rv2573	MamB	3	-16
vapB38	MamA	3	-36
vapB38	MamA	3	-39
gdh	MamA	3	-45
gdh	MamA	3	-42
yjcE	MamA	1	-41
yjcE	MamA	1	-44
Rv2285	MamB	4	-2
Rv2161c	MamA	3	-94
Rv2161c	MamA	3	-91
lppK	MamA	3	-30
lppK	MamA	3	-33
dop	MamA	3	-73
dop	MamA	3	-70
pafA	HsdM	3	-18
pafA	HsdM	3	-11
Rv2024c	MamB	1	-1
PPE32	MamB	3	-17
Rv1502	MamA	3	-47
Rv1502	MamA	3	-50
Rv1424c	MamA	3	-100
mbtN	HsdM	1	-1
Rv1200	MamA	3	-1
Rv1167c	MamA	3	-64
PE_PGRS22	MamA	3	-63
PE_PGRS22	MamA	3	-66
PE_PGRS15	MamA	3	-44
PE_PGRS15	MamA	3	-41
cspB	MamA	3	-22
cspB	MamA	3	-25
rpfA	HsdM	1	-83
rpfA	HsdM	1	-76
Rv3186	MamA	1	-27
Rv3186	MamA	1	-24
manB	MamA	1	-93
manB	MamA	1	-96
no_downstream_cds	HsdM	4	-34
whiB5	HsdM	2	-72
Rv0029	HsdM	2	-11
Rv0108c	MamA	1	-35
Rv0108c	MamA	1	-38
fadD30	HsdM	3	-31
fadD30	HsdM	3	-24
Rv0796	MamA	2	-4
Rv0796	MamA	2	-7
Rv0796	MamA	2	-58
Rv0796	MamA	2	-61
Rv1767	MamA	1	-90
Rv1767	MamA	1	-87
Rv3190A	MamA	6	-47
Rv3190A	MamA	6	-44
PE_PGRS60	MamA	3	-4
PE_PGRS60	MamA	3	-1
nth	MamA	3	-90
nth	MamA	3	-93
PE_PGRS14	HsdM	2	-66
PE_PGRS14	HsdM	2	-73
no_downstream_cds	HsdM	2	-14
no_downstream_cds	HsdM	2	-21
Rv2280	MamA	2	-5
Rv2280	MamA	2	-8
Rv2280	MamA	2	-56
Rv2280	MamA	2	-59
no_downstream_cds	MamB	2	-1
Rv1498A	MamA	2	-47
Rv1498A	MamA	2	-44
lprD	HsdM	2	-1
ppgK	MamA	2	-52
ppgK	MamA	1	-55
higA	MamA	1	-49
higA	MamA	1	-52
Rv1944c	HsdM	1	-19
Rv1944c	HsdM	1	-12
ephB	MamA	1	-31
ephB	MamA	1	-34
mpt63	MamA	1	-39
mpt63	MamA	1	-36
Rv0876c	MamA	1	-60
Rv0876c	MamA	1	-57
Rv0336	MamA	4	-47
Rv0336	MamA	4	-44
Rv0648	MamA	4	-15
Rv0648	MamA	4	-12
Rv0826	HsdM	1	-12
Rv0826	HsdM	1	-5
Rv1928c	HsdM	3	-56
Rv1928c	HsdM	3	-63
Rv2843	MamB	3	-8
Rv2844	MamA	3	-70
Rv2844	MamA	3	-67
no_downstream_cds	MamB	2	0
Rv0870c	MamA	3	-45
Rv0870c	MamA	3	-48
rpmF	MamB	1	-22
Rv1760	MamA	1	-14
Rv1760	MamA	1	-11
Rv1774	MamA	1	-14
Rv1774	MamA	1	-11
Rv2114	MamA	1	-82
dop	MamA	1	-90
PPE38	MamA	1	-73
PPE38	MamA	1	-76
glyS	MamB	1	-69
vapB23	MamA	1	-15
vapB23	MamA	1	-12
agpS	MamB	1	-23
moaA1	MamA	1	-21
agpS	MamA	1	-1
Rv3188	MamA	1	-21
Rv3188	MamA	1	-18
PE_PGRS57	MamA	1	-87
PE_PGRS57	MamA	1	-84
pks6	MamA	1	-31
pks6	MamA	1	-28
Rv0519c	MamA	2	-22
Rv0519c	MamA	2	-25
PPE39	HsdM	1	-19
PPE39	HsdM	1	-26
PPE39	MamB	1	-45
Rv3386	MamA	1	-62
Rv3386	MamA	1	-59
no_downstream_cds	MamB	1	-94
Rv1085c	MamB	1	-31
Rv1507A	HsdM	1	-31
Rv1507A	HsdM	1	-24
no_downstream_cds	MamA	2	-72
Rv3510c	MamB	1	-82
Rv0472c	MamA	1	-4
Rv0472c	MamA	1	-7
Rv1057	MamA	1	-65
Rv1057	MamA	1	-62
Rv1060	HsdM	1	-12
Rv1060	HsdM	1	-19
glpX	HsdM	1	-8
glpX	HsdM	1	-13
Rv1764	HsdM	1	-24
Rv1764	HsdM	1	-31
no_downstream_cds	MamB	2	-43
cobL	MamB	3	-71
gdh	MamA	1	-80
gdh	MamA	1	-83
Rv2803	MamA	1	-7
Rv2803	MamA	1	-4
rplM	MamB	1	-34
Rv0393	MamB	1	-56
ligB	MamA	2	-26
ligB	MamA	2	-23
Rv3712	MamA	1	-55
Rv3712	MamA	1	-52
rpmE	MamA	1	-66
rpmE	MamA	1	-63
mpt64	MamA	2	-72
no_downstream_cds	HsdM	1	-96
no_downstream_cds	HsdM	1	-37
PE4	MamA	4	-4
PE4	MamA	4	-7
glpX	MamA	2	-36
glpX	MamA	2	-39
glpX	HsdM	2	-6
glpX	HsdM	2	-11
Rv1508c	MamA	2	-12
Rv1508c	MamA	2	-9
Rv1524	HsdM	1	-90
Rv1524	HsdM	1	-83
Rv2183c	MamA	1	0
Rv2183c	MamA	1	-3
Rv2283	MamB	2	-46
Rv2305	MamA	1	-54
Rv2305	MamA	1	-51
htdY	MamB	1	-40
htdY	MamB	1	-48
acrA1	MamA	1	-90
PE_PGRS58	MamB	2	-72
lysA	MamB	1	-42
Rv3789	MamA	1	-27
Rv3789	MamA	1	-24
atsD	MamA	1	-41
atsD	MamA	1	-38
Rv1524	MamB	1	-80
fadD24	MamB	1	-91
Rv3190A	MamA	1	-49
Rv0725c	MamA	1	-3
Rv0725c	MamA	1	-6
Rv0731c	MamA	1	-54
Rv0731c	MamA	1	-57
Rv0850	MamB	1	-62
Rv1672c	MamB	1	-39
Rv1772	MamA	1	-9
Rv1772	MamA	1	-6
Rv1773c	MamB	1	-62
pitB	MamA	1	-8
pitB	MamA	1	-15
vapB38	MamA	1	-90
vapB38	MamA	1	-87
Rv2775	MamA	1	-100
Rv2775	MamA	1	-97
Rv2808	MamA	1	-69
Rv2808	MamA	1	-66
Rv2808	MamB	1	-7
Rv3160c	MamA	1	-12
Rv3160c	MamA	1	-75
Rv3182	MamA	1	-100
moaC3	MamA	1	-90
moaC3	MamA	1	-93
Rv3324A	HsdM	2	-24
Rv3324A	HsdM	2	-31
Rv3368c	MamA	1	-44
Rv3368c	MamA	1	-47
Rv3717	MamA	1	-52
Rv3717	MamA	1	-49
Rv3916c	MamA	1	-42
Rv3916c	MamA	1	-45
Rv0497	MamB	1	-54
rho	MamA	1	-38
rho	MamA	1	-35
Rv2280	MamA	1	-63
Rv2280	MamA	1	-60
Rv2295	HsdM	1	-31
Rv2295	HsdM	1	-24
no_downstream_cds	MamA	1	-12
no_downstream_cds	MamA	1	-9
Rv3192	MamB	1	-21
Rv3361c	MamA	1	-65
Rv3361c	MamA	1	-68
PE27A	MamA	1	-33
PE27A	MamA	1	-36
PE27A	MamB	1	-95
Rv0876c	MamA	1	-62
PE9	MamB	2	-2
Rv1435c	MamB	1	-50
fdhD	HsdM	1	-36
fdhD	HsdM	1	-43
lepB	MamA	1	-30
lepB	MamA	1	-33
echA3	MamA	1	-88
echA3	MamA	1	-91
no_downstream_cds	MamA	1	-22
Rv3127	HsdM	1	-6
Rv3128c	HsdM	1	-74
tgs1	HsdM	1	-66
tgs1	HsdM	1	-73
devS	MamB	1	-7
devS	MamA	1	-40
devS	MamA	1	-43
Rv0176	MamB	2	-97
Rv0837c	MamB	1	-42
Rv0843	MamA	1	-89
Rv0843	MamA	1	-86
pip	MamA	1	-30
pip	MamA	1	-33
Rv1042c	MamA	1	-43
Rv1042c	MamA	1	-46
lppR	HsdM	1	-68
lppR	HsdM	1	-75
Rv2405	MamA	1	-89
Rv2405	MamA	1	-86
no_downstream_cds	MamA	3	-100
Rv0976c	MamB	1	-31
sigE	MamA	1	-88
sigE	MamA	1	-85
PE_PGRS27	MamA	1	-52
PE_PGRS27	MamA	1	-55
rpfD	MamB	1	-51
PE31	HsdM	1	-49
PE31	HsdM	1	-42
bpoA	MamA	1	-67
bpoA	MamA	1	-70
Rv1765A	MamB	1	-32
PE_PGRS31	MamA	1	-91
PE_PGRS31	MamA	1	-88
Rv2161c	MamA	1	-92
Rv2161c	MamA	1	-95
nrdE	MamA	1	-37
nrdE	MamA	1	-40
nrdE	MamA	1	-70
nrdE	MamA	1	-73
Rv3050c	MamA	1	-19
Rv3050c	MamA	1	-22
Rv3047c	MamB	1	-72
Rv2694c	MamA	1	-43
Rv2694c	MamA	1	-46
ppgK	MamA	1	-49
sigA	MamA	1	-66
sigA	MamA	1	-63
Rv2961	MamA	1	-23
Rv2961	MamA	1	-20
Rv3382c	MamB	1	-91
vapB46	MamB	2	-46
Rv3916c	MamA	1	-47
Rv3916c	MamA	1	-50
Rv0038	MamA	1	-62
Rv0038	MamA	1	-59
Rv0142	MamA	1	-46
Rv0142	MamA	1	-43
Rv0141c	MamA	1	-49
Rv0141c	MamA	1	-52
Rv0145	MamB	1	-77
mshA	MamA	1	-90
mshA	MamA	1	-87
Rv1813c	MamA	1	-5
Rv1813c	MamA	1	-8
Rv1824	MamA	1	-21
Rv1824	MamA	1	-18
garA	MamA	1	-7
garA	MamA	1	-4
Rv2177c	MamA	1	-93
Rv2177c	MamA	1	-96
Rv2370c	MamA	1	-32
Rv2370c	MamA	1	-35
amiA2	MamA	1	-98
amiA2	MamA	1	-95
Rv2183c	MamA	1	-39
Rv2183c	MamA	1	-42
recO	MamA	1	-1
recO	MamA	1	-4
Rv2361c	MamB	1	-70
Rv2189c	MamB	1	0
Rv2191	MamA	1	-52
Rv2191	MamA	1	-49
ctaE	MamA	1	-12
ctaE	MamA	1	-9
qcrC	HsdM	1	-31
qcrC	HsdM	1	-24
Rv1757c	HsdM	1	-47
Rv1757c	HsdM	1	-54
ctaC	MamB	1	0
no_downstream_cds	MamB	1	-19
vapB23	MamB	1	-72
Rv3190A	MamA	1	-27
Rv3190A	MamA	1	-24
Rv1765A	MamB	1	-19
Rv3378c	HsdM	1	-34
Rv3378c	HsdM	1	-41
Rv1482c	MamA	1	-3
Rv1482c	MamA	1	-6
mazE4	MamA	1	-49
mazE4	MamA	1	-46
lipL	MamA	1	-22
lipL	MamA	1	-19
Rv1498A	MamA	1	-91
Rv1498A	MamA	1	-94
PE20	HsdM	1	-44
PE20	HsdM	1	-37
lppD	HsdM	2	-90
lppD	HsdM	2	-97
PPE38	MamA	1	-78
PPE38	MamA	1	-81
Rv2955c	MamA	1	-63
Rv2955c	MamA	1	-66
Rv3549c	MamA	1	-60
Rv3549c	MamA	1	-63
kstR	MamA	1	-68
kstR	MamA	1	-65
espA	MamA	1	-30
espA	MamA	1	-33
lpqG	HsdM	1	-99
lpqG	HsdM	1	-92
hpt	MamA	1	-75
hpt	MamA	1	-78
Rv3627c	MamA	1	-64
Rv3627c	MamA	1	-67
Rv3636	MamA	1	-34
Rv3636	MamA	1	-31
Rv3642c	HsdM	1	-79
Rv3642c	HsdM	1	-86
aftB	MamB	1	-85
glf	HsdM	1	-5
glf	HsdM	1	-12
Rv3916c	MamA	1	-43
Rv3916c	MamA	1	-46
Rv1035c	MamA	1	-72
Rv1035c	MamA	1	-75
coaA	MamA	1	-64
coaA	MamA	1	-67
Rv1730c	MamA	1	-83
Rv1730c	MamA	1	-86
Rv1732c	MamB	1	-14
Rv1765c	HsdM	1	-75
Rv1765c	HsdM	1	-68
vapB37	HsdM	1	-16
vapB37	HsdM	1	-23
Rv2172c	MamA	1	-53
Rv2172c	MamA	1	-56
Rv2172c	MamB	1	-72
Rv2348c	HsdM	1	-24
Rv2348c	HsdM	1	-31
recO	MamB	1	-10
recO	MamB	1	-72
hrcA	MamB	1	-96
hrcA	MamB	1	-2
hemN	MamA	1	-49
hemN	MamA	1	-52
Rv2401	MamA	1	-63
Rv2401	MamA	1	-60
no_downstream_cds	MamA	1	-8
no_downstream_cds	MamA	1	-5
rubA	MamA	1	-9
whiB2	MamB	1	-80
PE22	MamA	1	-58
PE22	MamA	1	-55
hemE	MamA	1	-11
hemE	MamA	1	-14
no_downstream_cds	MamB	1	-55
Rv0756c	HsdM	1	-24
Rv0756c	HsdM	1	-31
Rv0760c	MamA	1	-58
Rv0760c	MamA	1	-61
Rv0762c	MamA	1	-61
Rv0762c	MamA	1	-64
Rv0770	HsdM	1	-21
Rv0770	HsdM	1	-14
Rv2369c	MamB	1	-20
TB15.3	HsdM	1	-16
TB15.3	HsdM	1	-9
Rv1639c	MamA	1	-36
infC	MamA	1	-14
Rv2077A	MamB	1	-29
vapB37	HsdM	1	-14
vapB37	HsdM	1	-21
Rv2184c	HsdM	1	-57
Rv2184c	HsdM	1	-64
Rv3322c	MamB	1	-24
sigM	MamA	1	-1
Rv1490	MamA	1	-82
Rv1490	MamA	1	-79
no_downstream_cds	HsdM	1	-22
PPE39	MamA	1	-16
PPE39	MamA	1	-19
glyS	MamA	1	-29
glyS	MamA	1	-32
hemN	MamA	1	-89
hemN	MamA	1	-92
Rv2859c	MamA	1	-94
Rv2859c	MamA	1	-97
vapB23	MamB	1	-80
Rv3128c	MamB	1	-49
Rv3190A	MamA	1	-45
Rv3190A	MamA	1	-42
Rv0731c	MamA	1	-37
Rv0731c	MamA	1	-40
no_downstream_cds	MamA	5	-61
vapB46	MamA	1	0
vapB46	MamA	1	-3
papA1	HsdM	1	-26
papA1	HsdM	1	-33
Rv2077A	MamA	2	-25
Rv2077A	MamA	2	-28
Rv2077A	MamB	2	-87
Rv2168c	MamA	2	-16
Rv2168c	MamA	2	-13
pknL	MamB	1	-55
Rv2285	HsdM	2	-35
Rv2285	HsdM	2	-28
Rv2288	MamA	2	-27
Rv2288	MamA	2	-24
Rv2437	MamB	1	-71
Rv2437	MamA	1	-12
Rv2437	MamA	1	-9
no_downstream_cds	HsdM	1	-49
no_downstream_cds	HsdM	1	-56
vapB23	MamB	2	-17
no_downstream_cds	HsdM	2	-7
moaC3	MamA	2	-76
moaC3	MamA	3	-79
no_downstream_cds	MamA	2	-29
no_downstream_cds	MamA	2	-32
Rv2113	MamA	1	-100
Rv0826	HsdM	1	-7
Rv0826	HsdM	1	-14
PPE24	HsdM	1	-24
PPE24	HsdM	1	-31
PPE38	MamA	1	-53
PPE38	MamA	1	-56
Rv0078A	HsdM	1	-55
Rv0078A	HsdM	1	-62
Rv0519c	MamB	1	-31
gabP	MamB	1	-99
csoR	MamA	1	-68
csoR	MamA	1	-65
Rv1359	HsdM	1	-31
Rv1359	HsdM	1	-24
Rv2355	MamA	1	-44
Rv2355	MamA	1	-47
adh	HsdM	1	-18
adh	HsdM	1	-11
Rv1531	MamB	1	-47
Rv1770	MamA	1	-38
Rv1770	MamA	1	-35
Rv1772	MamA	1	-94
Rv1772	MamA	1	-91
hemE	MamA	1	-62
hemE	MamA	1	-65
no_downstream_cds	MamA	1	-53
Rv2822c	HsdM	1	-57
Rv2822c	HsdM	1	-64
ppk2	MamA	1	-95
ppk2	MamA	1	-98
ppk2	MamB	1	-18
moaC3	MamA	1	-82
Rv2348c	HsdM	1	-12
Rv2348c	HsdM	1	-19
PPE34	HsdM	1	-60
PPE34	HsdM	1	-67
Rv1914c	MamA	1	-9
Rv1914c	MamA	1	-12
Rv2285	HsdM	1	-31
Rv2285	HsdM	1	-24
Rv2285	MamA	1	-55
Rv2285	MamA	1	-52
Rv2288	MamA	1	-26
Rv2288	MamA	1	-23
Rv0691A	MamA	1	-6
no_downstream_cds	MamA	1	-1
Rv0021c	MamB	2	-97
plcC	HsdM	2	-24
plcC	HsdM	2	-31
Rv3128c	MamB	2	-13
Rv3128c	MamA	2	-51
Rv3128c	MamA	2	-48
Rv3177	HsdM	2	-41
Rv3177	HsdM	2	-34
no_downstream_cds	HsdM	2	-1
Rv3181c	HsdM	2	-24
Rv3181c	HsdM	2	-31
htdY	MamB	2	-3
Rv0446c	MamB	1	-1
PPE34	MamA	1	-32
PPE34	MamA	1	-35
Rv3381c	HsdM	1	-93
rpsF	MamA	1	-61
rpsF	MamA	1	-58
echA3	MamA	1	-54
echA3	MamA	1	-57
hadA	MamB	1	-63
Rv2802c	MamA	1	-1
Rv2802c	MamA	1	-2
Rv2813	MamB	1	-3
