# Supplementary material for: Drivers and sites of diversity in the DNA adenine methylomes of 93 Mycobacterium tuberculosis complex clinical isolates
Source: eLife. 2020 Oct 27;9:e58542. doi: 10.7554/eLife.58542 (PMC7591249; doi:10.7554/eLife.58542)
Supplement: Figure 6—source data 2. [file elife-58542-fig6-data2.csv]

TSS_downstream_gene	abs_TSS_dist	MTase	sigma factor	count	binding region
gyrB	13	HsdM	sigA	91	-10
Rv0029	12	HsdM	sigA	91	-10
Rv0061c	12	HsdM	sigA	87	-10
Rv0102	7	MamA	sigA	93	-10
Rv0138	7	MamA	sigA	93	-10
PE4	8	MamA	sigA	89	-10
Rv0250c	12	HsdM	sigA	93	-10
mmpS4	7	MamA	sigA	93	-10
mazF1	9	HsdM	sigA	93	-10
vapB28	12	HsdM	sigA	93	-10
purB	12	HsdM	sigA	90	-10
Rv0826	13	HsdM	sigA	87	-10
Rv0863	12	HsdM	sigA	78	-10
PE_PGRS21	12	HsdM	sigA	80	-10
glpX	10	HsdM	sigA	90	-10
Rv1149	13	HsdM	sigA	85	-10
PE12	12	HsdM	sigA	93	-10
Rv1230c	11	HsdM	sigA	93	-10
corA	8	MamA	sigA	93	-10
Rv1251c	13	HsdM	sigA	85	-10
mmpL12	11	HsdM	sigA	91	-10
adh	12	HsdM	sigA	87	-10
Rv1813c	11	HsdM	sigA	93	-10
PE_PGRS33	12	HsdM	sigA	90	-10
Rv1944c	13	HsdM	sigA	86	-10
lipT	11	HsdM	sigA	93	-10
pafA	12	HsdM	sigA	88	-10
Rv2348c	13	HsdM	sigA	73	-10
Rv2631	13	HsdM	sigA	90	-10
argA	13	HsdM	sigA	93	-10
truB	12	HsdM	sigA	93	-10
Rv2825c	12	HsdM	sigA	93	-10
Rv3127	13	HsdM	sigA	84	-10
whiB7	8	MamA	sigA	93	-10
Rv3284	12	HsdM	sigA	47	-10
Rv3312c	13	HsdM	sigA	78	-10
Rv3312A	11	HsdM	sigA	78	-10
Rv3378c	7	MamA	sigA	60	-10
PE_PGRS53	12	HsdM	sigA	92	-10
echA19	7	MamA	sigA	89	-10
Rv3583c	8	MamA	sigA	92	-10
Rv3683	7	MamB	sigA	91	-10
Rv3728	7	MamA	sigA	93	-10
Rv3780	11	HsdM	sigA	93	-10
glf	11	HsdM	sigA	92	-10
PE36	7	MamA	sigA	93	-10
Rv3484	12	HsdM	sigA	90	-10
Rv0007	8	MamB	sigB	91	-10
Rv0039c	7	MamA	sigB	92	-10
Rv0102	7	MamA	sigB	93	-10
Rv0138	7	MamA	sigB	93	-10
Rv0142	8	MamA	sigB	91	-10
PE4	8	MamA	sigB	89	-10
Rv0365c	7	MamA	sigB	92	-10
mmpS4	7	MamA	sigB	93	-10
Rv0465c	7	MamA	sigB	87	-10
Rv0691A	7	MamA	sigB	86	-10
mmsB	6	MamA	sigB	85	-10
purB	12	HsdM	sigB	90	-10
Rv0799c	7	MamA	sigB	91	-10
Rv0898c	7	MamA	sigB	69	-10
Rv1049	7	MamA	sigB	91	-10
Rv1230c	11	HsdM	sigB	93	-10
corA	8	MamA	sigB	93	-10
lprD	8	HsdM	sigB	82	-10
Rv1358	6	MamA	sigB	84	-10
Rv1597	7	MamA	sigB	77	-10
Rv1817	7	MamA	sigB	92	-10
lipT	11	HsdM	sigB	93	-10
Rv2280	7	MamA	sigB	63	-10
rplU	6	MamA	sigB	93	-10
Rv2556c	6	MamA	sigB	91	-10
Rv2721c	7	MamA	sigB	93	-10
Rv3083	7	MamA	sigB	87	-10
whiB7	8	MamA	sigB	93	-10
rubA	12	MamA	sigB	89	-10
Rv3284	12	HsdM	sigB	47	-10
Rv3312c	13	HsdM	sigB	78	-10
Rv3378c	7	MamA	sigB	60	-10
fdxD	8	MamA	sigB	91	-10
echA19	7	MamA	sigB	89	-10
Rv3583c	8	MamA	sigB	92	-10
Rv3683	7	MamB	sigB	91	-10
Rv3728	7	MamA	sigB	93	-10
Rv3779	7	MamA	sigB	93	-10
glf	11	HsdM	sigB	92	-10
PE36	7	MamA	sigB	93	-10
glnA3	10	HsdM	sigB	89	-10
glpX	10	HsdM	sigF	90	-10
lipT	11	HsdM	sigF	93	-10
Rv0007	8	MamB	sigI	91	-10
Rv0029	12	HsdM	sigI	91	-10
Rv0138	7	MamA	sigI	93	-10
Rv0250c	12	HsdM	sigI	93	-10
vapB28	11	HsdM	sigI	93	-10
vapB28	12	HsdM	sigI	93	-10
purB	12	HsdM	sigI	90	-10
Rv0826	6	HsdM	sigI	87	-10
Rv0863	12	HsdM	sigI	78	-10
PE_PGRS21	12	HsdM	sigI	80	-10
glpX	10	HsdM	sigI	90	-10
PE12	12	HsdM	sigI	93	-10
lprD	8	HsdM	sigI	82	-10
mmpL12	11	HsdM	sigI	91	-10
adh	12	HsdM	sigI	87	-10
TB15.3	10	HsdM	sigI	62	-10
Rv1813c	11	HsdM	sigI	93	-10
Rv2348c	13	HsdM	sigI	73	-10
Rv2556c	6	MamA	sigI	91	-10
Rv2631	13	HsdM	sigI	90	-10
Rv2825c	12	HsdM	sigI	93	-10
rubA	12	MamA	sigI	88	-10
Rv3284	12	HsdM	sigI	47	-10
Rv3312c	13	HsdM	sigI	78	-10
Rv3312A	11	HsdM	sigI	78	-10
Rv3378c	7	MamA	sigI	60	-10
echA19	7	MamA	sigI	89	-10
Rv3780	11	HsdM	sigI	93	-10
PE36	7	MamA	sigI	93	-10
Rv3484	12	HsdM	sigI	90	-10
