# Supplementary material for: Drivers and sites of diversity in the DNA adenine methylomes of 93 Mycobacterium tuberculosis complex clinical isolates
Source: eLife. 2020 Oct 27;9:e58542. doi: 10.7554/eLife.58542 (PMC7591249; doi:10.7554/eLife.58542)
Supplement: Figure 6—source data 3. [file elife-58542-fig6-data3.csv]

TSS_downstream_gene	MTase	category
Rv0004	MamA	sequence match
gyrB	HsdM	full promoter
Rv0007	MamB	element match
Rv0029	HsdM	full promoter
Rv0039c	MamA	full promoter
Rv0061c	HsdM	full promoter
Rv0102	MamA	full promoter
Rv0108c	MamB	location match
Rv0108c	MamA	location match
fadD7	MamA	location match
cyp138	MamA	location match
Rv0138	MamA	full promoter
Rv0142	MamA	element match
Rv0149	MamA	sequence match
PE4	MamA	full promoter
Rv0176	MamB	location match
lprO	MamB	sequence match
Rv0190	MamB	sequence match
Rv0247c	MamA	sequence match
Rv0250c	HsdM	element match
vapB25	MamA	sequence match
Rv0281	MamA	location match
PE_PGRS5	MamA	location match
Rv0306	MamA	location match
Rv0318c	MamA	sequence match
Rv0336	MamA	sequence match
iniA	MamA	full promoter
ansP2	MamA	sequence match
Rv0358	MamA	sequence match
Rv0365c	MamA	full promoter
pks6	MamA	location match
Rv0446c	MamB	sequence match
mmpS4	MamA	full promoter
mazF1	HsdM	full promoter
Rv0465c	MamA	full promoter
Rv0474	MamB	sequence match
Rv0565c	MamA	location match
Rv0585c	MamB	sequence match
vapB28	HsdM	full promoter
echA3	MamA	sequence match
atsD	MamA	location match
Rv0691A	MamA	element match
rpmC	HsdM	location match
mmsB	MamA	element match
Rv0767c	MamB	sequence match
purB	HsdM	full promoter
Rv0784	MamA	sequence match
Rv0799c	MamA	element match
mshD	HsdM	location match
Rv0826	HsdM	full promoter
PE_PGRS12	MamA	location match
Rv0842	MamA	sequence match
Rv0863	HsdM	full promoter
PE_PGRS15	MamA	element match
citA	MamA	sequence match
Rv0893c	MamA	sequence match
Rv0898c	MamA	element match
Rv0919	HsdM	sequence match
Rv0942	MamA	location match
Rv0976c	MamA	location match
pepD	MamA	location match
Rv1004c	MamB	sequence match
Rv1036c	MamA	location match
Rv1049	MamA	element match
Rv1053c	MamA	sequence match
PE_PGRS20	MamA	sequence match
PE_PGRS21	HsdM	full promoter
Rv1085c	MamB	sequence match
Rv1089A	MamB	element match
glpX	MamA	location match
glpX	HsdM	full promoter
Rv1149	HsdM	full promoter
PE12	HsdM	full promoter
Rv1200	MamA	location match
Rv1199c	HsdM	sequence match
Rv1211	MamA	location match
Rv1219c	HsdM	sequence match
Rv1230c	HsdM	full promoter
corA	MamA	full promoter
Rv1250	MamA	location match
Rv1251c	HsdM	full promoter
amiB2	MamA	location match
oppB	MamA	location match
lprD	HsdM	full promoter
Rv1358	MamA	element match
Rv1370c	MamA	sequence match
rpoZ	MamB	sequence match
Rv1482c	MamA	full promoter
mazE4	MamA	sequence match
lipL	MamA	sequence match
mmpL12	HsdM	full promoter
adh	HsdM	full promoter
Rv1531	MamB	sequence match
bioF1	MamB	sequence match
Rv1597	MamA	element match
Rv1615	MamB	sequence match
cydC	MamA	sequence match
TB15.3	HsdM	full promoter
Rv1639c	MamA	location match
infC	MamA	full promoter
Rv1725c	MamB	location match
Rv1813c	HsdM	full promoter
Rv1817	MamA	element match
PE_PGRS33	HsdM	full promoter
ilvG	MamA	element match
mpt63	MamA	element match
ephB	MamA	location match
Rv1944c	HsdM	full promoter
higA	MamA	sequence match
Rv1986	MamA	full promoter
Rv2044c	MamA	sequence match
lipT	HsdM	full promoter
Rv2050	MamA	sequence match
Rv2077A	MamB	location match
pafA	HsdM	full promoter
mshC	MamA	location match
Rv2136c	MamA	sequence match
lppL	MamA	full promoter
Rv2280	MamA	full promoter
Rv2285	MamB	sequence match
Rv2348c	HsdM	full promoter
glyS	MamA	sequence match
Rv2360c	MamA	location match
dnaJ2	MamB	sequence match
mbtJ	MamA	sequence match
Rv2401	MamA	sequence match
nadD	MamA	sequence match
rplU	MamA	full promoter
Rv2456c	MamA	sequence match
clpX	HsdM	sequence match
scoA	HsdM	sequence match
ldtB	HsdM	location match
bcp	MamA	sequence match
Rv2556c	MamA	full promoter
Rv2565	MamB	location match
aspS	MamB	sequence match
yajC	MamB	sequence match
hrp1	MamA	sequence match
Rv2628	MamA	sequence match
Rv2631	HsdM	full promoter
Rv2638	MamA	sequence match
Rv2642	MamA	location match
Rv2721c	MamA	full promoter
Rv2733c	HsdM	full promoter
pgsA3	HsdM	location match
argA	HsdM	full promoter
Rv2775	MamA	location match
truB	HsdM	full promoter
Rv2825c	HsdM	full promoter
dacB2	MamA	sequence match
drrA	MamA	sequence match
pks15	MamA	sequence match
Rv2969c	HsdM	sequence match
Rv3047c	MamA	location match
Rv3058c	MamA	location match
Rv3083	MamA	full promoter
Rv3127	HsdM	full promoter
PPE50	MamA	sequence match
tgs1	MamA	element match
whiB7	MamA	full promoter
Rv3202c	MamA	full promoter
Rv3208	MamA	location match
tgs3	MamB	full promoter
rubA	MamA	full promoter
birA	MamA	location match
Rv3284	HsdM	full promoter
Rv3312c	HsdM	full promoter
Rv3312A	HsdM	full promoter
trpS	MamA	sequence match
icd1	MamA	location match
Rv3378c	MamA	full promoter
Rv3378c	MamB	location match
vapB46	MamB	sequence match
htdY	MamB	sequence match
rplM	MamB	location match
PE31	HsdM	element match
fdxD	MamA	full promoter
PE_PGRS53	HsdM	full promoter
echA19	MamA	full promoter
Rv3583c	MamA	full promoter
PE_PGRS60	MamA	sequence match
Rv3683	MamB	full promoter
Rv3688c	MamA	location match
asd	MamB	location match
Rv3728	MamA	full promoter
tcrY	MamA	location match
Rv3779	MamA	element match
Rv3780	HsdM	full promoter
Rv3778c	HsdM	none
glf	HsdM	full promoter
PE_PGRS62	MamA	location match
glf	MamA	location match
Rv3829c	MamA	sequence match
Rv3844	MamA	sequence match
gltB	MamB	location match
PE35	MamA	sequence match
PE36	MamA	full promoter
sigM	MamA	sequence match
mkl	MamB	sequence match
Rv1772	HsdM	sequence match
Rv1779c	MamA	sequence match
PPE25	MamA	location match
PPE25	HsdM	sequence match
glnA3	HsdM	full promoter
Rv2172c	MamB	location match
Rv2305	MamA	full promoter
Rv2315c	MamA	sequence match
Rv3481c	HsdM	none
Rv3484	HsdM	full promoter
ephA	MamA	sequence match
espC	HsdM	full promoter
espA	MamA	location match
Rv3636	MamA	location match
vapB37	HsdM	sequence match
rpmE	MamB	sequence match
Rv1760	MamB	location match
dop	MamA	sequence match
