# Supplementary material for: Drivers and sites of diversity in the DNA adenine methylomes of 93 Mycobacterium tuberculosis complex clinical isolates
Source: eLife. 2020 Oct 27;9:e58542. doi: 10.7554/eLife.58542 (PMC7591249; doi:10.7554/eLife.58542)
Supplement: Figure 6—source data 5. [file elife-58542-fig6-data5.csv]

TSS_downstream_gene	MTase	sigma factor	count	binding region	bp upstream of TSS
gyrB	HsdM	sigA	91	-10	-13
Rv0029	HsdM	sigA	91	-10	-12
Rv0061c	HsdM	sigA	87	-10	-12
Rv0102	MamA	sigA	93	-10	-7
Rv0138	MamA	sigA	93	-10	-7
PE4	MamA	sigA	89	-10	-8
Rv0250c	HsdM	sigA	93	-10	-12
mmpS4	MamA	sigA	93	-10	-7
mazF1	HsdM	sigA	93	-10	-9
vapB28	HsdM	sigA	93	-10	-12
purB	HsdM	sigA	90	-10	-12
Rv0826	HsdM	sigA	87	-10	-13
Rv0863	HsdM	sigA	78	-10	-12
Rv0919	HsdM	sigA	93	-10	-27
PE_PGRS21	HsdM	sigA	80	-10	-12
glpX	HsdM	sigA	90	-10	-10
Rv1149	HsdM	sigA	85	-10	-13
PE12	HsdM	sigA	93	-10	-12
Rv1219c	HsdM	sigA	93	-10	-19
Rv1230c	HsdM	sigA	93	-10	-11
corA	MamA	sigA	93	-10	-8
Rv1251c	HsdM	sigA	85	-10	-13
mmpL12	HsdM	sigA	91	-10	-11
adh	HsdM	sigA	87	-10	-12
Rv1813c	HsdM	sigA	93	-10	-11
PE_PGRS33	HsdM	sigA	90	-10	-12
Rv1944c	HsdM	sigA	86	-10	-13
lipT	HsdM	sigA	93	-10	-11
pafA	HsdM	sigA	88	-10	-12
Rv2348c	HsdM	sigA	73	-10	-13
aspS	MamB	sigA	88	-10	-44
Rv2631	HsdM	sigA	90	-10	-13
Rv2733c	HsdM	sigA	93	-10	-31
argA	HsdM	sigA	93	-10	-13
truB	HsdM	sigA	93	-10	-12
Rv2825c	HsdM	sigA	93	-10	-12
pks15	MamA	sigA	93	-10	-46
Rv3127	HsdM	sigA	84	-10	-13
whiB7	MamA	sigA	93	-10	-8
Rv3284	HsdM	sigA	47	-10	-12
Rv3312c	HsdM	sigA	78	-10	-13
Rv3312A	HsdM	sigA	78	-10	-11
Rv3378c	MamA	sigA	60	-10	-7
PE_PGRS53	HsdM	sigA	92	-10	-12
echA19	MamA	sigA	89	-10	-7
Rv3583c	MamA	sigA	92	-10	-8
Rv3683	MamB	sigA	91	-10	-7
Rv3728	MamA	sigA	93	-10	-7
Rv3780	HsdM	sigA	93	-10	-11
glf	HsdM	sigA	92	-10	-11
PE36	MamA	sigA	93	-10	-7
PPE25	HsdM	sigA	90	-10	-15
Rv3484	HsdM	sigA	90	-10	-12
mesT	HsdM	sigA	16	-10	-12
Rv0004	MamA	sigB	93	-10	-48
Rv0004	MamA	sigB	93	-10	-45
Rv0007	MamB	sigB	91	-10	-8
Rv0039c	MamA	sigB	92	-10	-4
Rv0039c	MamA	sigB	92	-10	-7
Rv0102	MamA	sigB	93	-10	-7
Rv0102	MamA	sigB	93	-10	-4
Rv0108c	MamB	sigB	92	-10	-42
Rv0108c	MamA	sigB	92	-10	-34
Rv0108c	MamA	sigB	92	-10	-37
fadD7	MamA	sigB	87	-10	-40
fadD7	MamA	sigB	87	-10	-37
cyp138	MamA	sigB	92	-10	-36
cyp138	MamA	sigB	92	-10	-33
Rv0138	MamA	sigB	93	-10	-7
Rv0138	MamA	sigB	93	-10	-4
Rv0142	MamA	sigB	91	-10	-8
Rv0142	MamA	sigB	91	-10	-5
Rv0149	MamA	sigB	87	-10	-2
PE4	MamA	sigB	89	-10	-5
PE4	MamA	sigB	89	-10	-8
Rv0176	MamB	sigB	90	-10	-40
lprO	MamB	sigB	93	-10	-49
Rv0190	MamB	sigB	92	-10	-16
Rv0247c	MamA	sigB	87	-10	-15
Rv0247c	MamA	sigB	87	-10	-18
vapB25	MamA	sigB	91	-10	-49
Rv0281	MamA	sigB	88	-10	-39
Rv0281	MamA	sigB	88	-10	-36
PE_PGRS5	MamA	sigB	85	-10	-43
PE_PGRS5	MamA	sigB	85	-10	-40
Rv0306	MamA	sigB	91	-10	-30
Rv0306	MamA	sigB	91	-10	-27
Rv0318c	MamA	sigB	86	-10	0
Rv0336	MamA	sigB	82	-10	-48
Rv0336	MamA	sigB	82	-10	-45
iniA	MamA	sigB	90	-10	-35
iniA	MamA	sigB	90	-10	-32
ansP2	MamA	sigB	86	-10	-43
ansP2	MamA	sigB	86	-10	-46
Rv0358	MamA	sigB	86	-10	-50
Rv0365c	MamA	sigB	92	-10	-4
Rv0365c	MamA	sigB	92	-10	-7
pks6	MamA	sigB	80	-10	-30
pks6	MamA	sigB	80	-10	-27
Rv0446c	MamB	sigB	92	-10	0
mmpS4	MamA	sigB	93	-10	-7
Rv0465c	MamA	sigB	87	-10	-4
Rv0465c	MamA	sigB	87	-10	-7
Rv0474	MamB	sigB	93	-10	-21
Rv0565c	MamA	sigB	93	-10	-36
Rv0565c	MamA	sigB	93	-10	-39
Rv0585c	MamB	sigB	93	-10	-23
echA3	MamA	sigB	91	-10	-22
echA3	MamA	sigB	91	-10	-25
atsD	MamA	sigB	92	-10	-40
atsD	MamA	sigB	92	-10	-37
Rv0691A	MamA	sigB	86	-10	-7
rpmC	HsdM	sigB	32	-10	-26
mmsB	MamA	sigB	85	-10	-3
mmsB	MamA	sigB	85	-10	-6
Rv0767c	MamB	sigB	89	-10	-20
purB	HsdM	sigB	90	-10	-12
Rv0784	MamA	sigB	87	-10	-3
Rv0799c	MamA	sigB	91	-10	-4
Rv0799c	MamA	sigB	91	-10	-7
PE_PGRS12	MamA	sigB	90	-10	-35
PE_PGRS12	MamA	sigB	90	-10	-32
Rv0842	MamA	sigB	85	-10	-4
Rv0842	MamA	sigB	85	-10	-1
PE_PGRS15	MamA	sigB	86	-10	-35
PE_PGRS15	MamA	sigB	86	-10	-38
citA	MamA	sigB	93	-10	-18
citA	MamA	sigB	93	-10	-21
Rv0893c	MamA	sigB	93	-10	-19
Rv0893c	MamA	sigB	93	-10	-22
Rv0898c	MamA	sigB	69	-10	-4
Rv0898c	MamA	sigB	69	-10	-7
Rv0919	HsdM	sigB	93	-10	-20
Rv0942	MamA	sigB	93	-10	-40
Rv0942	MamA	sigB	93	-10	-37
Rv0942	MamA	sigB	93	-10	-28
Rv0942	MamA	sigB	93	-10	-25
Rv0976c	MamA	sigB	90	-10	-33
Rv0976c	MamA	sigB	90	-10	-36
pepD	MamA	sigB	93	-10	-41
pepD	MamA	sigB	93	-10	-38
Rv1004c	MamB	sigB	82	-10	-45
Rv1036c	MamA	sigB	92	-10	-29
Rv1036c	MamA	sigB	92	-10	-32
Rv1049	MamA	sigB	91	-10	-7
Rv1049	MamA	sigB	91	-10	-4
Rv1053c	MamA	sigB	93	-10	-48
PE_PGRS20	MamA	sigB	74	-10	-20
PE_PGRS20	MamA	sigB	74	-10	-23
Rv1085c	MamB	sigB	55	-10	-43
Rv1089A	MamB	sigB	57	-10	-14
glpX	MamA	sigB	85	-10	-35
glpX	MamA	sigB	85	-10	-38
glpX	HsdM	sigB	84	-10	-5
Rv1149	HsdM	sigB	85	-10	-20
Rv1200	MamA	sigB	93	-10	-32
Rv1200	MamA	sigB	93	-10	-29
Rv1199c	HsdM	sigB	92	-10	-44
Rv1211	MamA	sigB	91	-10	-44
Rv1211	MamA	sigB	91	-10	-41
Rv1219c	HsdM	sigB	93	-10	-26
Rv1230c	HsdM	sigB	93	-10	-11
corA	MamA	sigB	93	-10	-5
corA	MamA	sigB	93	-10	-8
Rv1250	MamA	sigB	85	-10	-34
Rv1250	MamA	sigB	85	-10	-31
Rv1251c	HsdM	sigB	85	-10	-20
amiB2	MamA	sigB	84	-10	-41
amiB2	MamA	sigB	84	-10	-38
oppB	MamA	sigB	69	-10	-40
oppB	MamA	sigB	69	-10	-43
lprD	HsdM	sigB	82	-10	-8
Rv1358	MamA	sigB	84	-10	-6
Rv1358	MamA	sigB	84	-10	-3
Rv1370c	MamA	sigB	30	-10	-25
Rv1370c	MamA	sigB	30	-10	-22
rpoZ	MamB	sigB	93	-10	-5
Rv1473A	MamA	sigB	27	-10	-50
Rv1473A	MamA	sigB	27	-10	-47
Rv1482c	MamA	sigB	92	-10	-2
Rv1482c	MamA	sigB	92	-10	-5
mazE4	MamA	sigB	92	-10	-50
mazE4	MamA	sigB	92	-10	-47
lipL	MamA	sigB	92	-10	-23
lipL	MamA	sigB	92	-10	-20
adh	HsdM	sigB	87	-10	-19
Rv1531	MamB	sigB	88	-10	-48
bioF1	MamB	sigB	93	-10	-49
Rv1597	MamA	sigB	77	-10	-7
Rv1597	MamA	sigB	77	-10	-4
Rv1615	MamB	sigB	79	-10	-26
cydC	MamA	sigB	79	-10	-50
Rv1639c	MamA	sigB	74	-10	-35
infC	MamA	sigB	78	-10	-15
Rv1725c	MamB	sigB	88	-10	-28
Rv1817	MamA	sigB	92	-10	-7
Rv1817	MamA	sigB	92	-10	-4
ilvG	MamA	sigB	91	-10	-37
ilvG	MamA	sigB	91	-10	-34
mpt63	MamA	sigB	92	-10	-37
mpt63	MamA	sigB	92	-10	-40
ephB	MamA	sigB	92	-10	-33
ephB	MamA	sigB	92	-10	-30
Rv1944c	HsdM	sigB	86	-10	-20
higA	MamA	sigB	90	-10	-48
Rv1986	MamA	sigB	91	-10	-17
Rv1986	MamA	sigB	91	-10	-14
Rv2044c	MamA	sigB	93	-10	-20
Rv2044c	MamA	sigB	93	-10	-23
lipT	HsdM	sigB	93	-10	-11
Rv2050	MamA	sigB	93	-10	-48
Rv2077A	MamB	sigB	87	-10	-28
mshC	MamA	sigB	93	-10	-28
mshC	MamA	sigB	93	-10	-31
Rv2136c	MamA	sigB	88	-10	-17
lppL	MamA	sigB	88	-10	-15
Rv2280	MamA	sigB	63	-10	-7
Rv2280	MamA	sigB	31	-10	-14
Rv2285	MamB	sigB	66	-10	-1
glyS	MamA	sigB	84	-10	-16
glyS	MamA	sigB	84	-10	-19
Rv2360c	MamA	sigB	89	-10	-39
Rv2360c	MamA	sigB	89	-10	-42
dnaJ2	MamB	sigB	90	-10	-19
mbtJ	MamA	sigB	93	-10	-24
mbtJ	MamA	sigB	93	-10	-21
Rv2401	MamA	sigB	84	-10	-24
Rv2401	MamA	sigB	84	-10	-21
nadD	MamA	sigB	93	-10	-16
nadD	MamA	sigB	93	-10	-19
rplU	MamA	sigB	93	-10	-3
rplU	MamA	sigB	93	-10	-6
Rv2456c	MamA	sigB	92	-10	-17
Rv2456c	MamA	sigB	92	-10	-20
scoA	HsdM	sigB	67	-10	-49
ldtB	HsdM	sigB	62	-10	-38
bcp	MamA	sigB	66	-10	-49
bcp	MamA	sigB	66	-10	-46
Rv2556c	MamA	sigB	91	-10	-3
Rv2556c	MamA	sigB	91	-10	-6
Rv2556c	MamA	sigB	91	-10	-36
Rv2556c	MamA	sigB	91	-10	-39
Rv2565	MamB	sigB	91	-10	-35
aspS	MamB	sigB	88	-10	-44
yajC	MamB	sigB	88	-10	-1
hrp1	MamA	sigB	90	-10	-19
hrp1	MamA	sigB	90	-10	-22
Rv2628	MamA	sigB	85	-10	-4
Rv2628	MamA	sigB	85	-10	-1
Rv2631	HsdM	sigB	90	-10	-20
Rv2638	MamA	sigB	91	-10	-25
Rv2638	MamA	sigB	91	-10	-22
Rv2642	MamA	sigB	90	-10	-33
Rv2642	MamA	sigB	90	-10	-30
Rv2721c	MamA	sigB	93	-10	-15
Rv2721c	MamA	sigB	93	-10	-7
Rv2733c	HsdM	sigB	93	-10	-31
pgsA3	HsdM	sigB	90	-10	-41
Rv2775	MamA	sigB	91	-10	-38
Rv2775	MamA	sigB	91	-10	-35
truB	HsdM	sigB	93	-10	-5
Rv2825c	HsdM	sigB	93	-10	-5
dacB2	MamA	sigB	84	-10	-48
drrA	MamA	sigB	93	-10	-18
drrA	MamA	sigB	93	-10	-15
pks15	MamA	sigB	93	-10	-46
pks15	MamA	sigB	93	-10	-49
Rv2969c	HsdM	sigB	89	-10	-5
Rv3047c	MamA	sigB	92	-10	-27
Rv3047c	MamA	sigB	92	-10	-30
Rv3058c	MamA	sigB	86	-10	-39
Rv3058c	MamA	sigB	86	-10	-42
Rv3083	MamA	sigB	87	-10	-7
PPE50	MamA	sigB	43	-10	-49
PPE50	MamA	sigB	43	-10	-46
tgs1	MamA	sigB	81	-10	-28
tgs1	MamA	sigB	81	-10	-31
whiB7	MamA	sigB	93	-10	-5
whiB7	MamA	sigB	93	-10	-8
Rv3202c	MamA	sigB	93	-10	-40
Rv3202c	MamA	sigB	90	-10	-43
Rv3208	MamA	sigB	87	-10	-41
Rv3208	MamA	sigB	87	-10	-38
tgs3	MamB	sigB	90	-10	-18
rubA	MamA	sigB	89	-10	-40
rubA	MamA	sigB	89	-10	-43
rubA	MamA	sigB	89	-10	-12
rubA	MamA	sigB	88	-10	-15
birA	MamA	sigB	43	-10	-39
birA	MamA	sigB	43	-10	-42
Rv3284	HsdM	sigB	47	-10	-19
Rv3284	HsdM	sigB	47	-10	-12
Rv3312c	HsdM	sigB	78	-10	-13
Rv3312A	HsdM	sigB	78	-10	-4
trpS	MamA	sigB	93	-10	-43
trpS	MamA	sigB	93	-10	-46
icd1	MamA	sigB	87	-10	-25
icd1	MamA	sigB	87	-10	-28
Rv3378c	MamA	sigB	60	-10	-4
Rv3378c	MamA	sigB	60	-10	-7
Rv3378c	MamB	sigB	60	-10	-34
vapB46	MamB	sigB	56	-10	-47
htdY	MamB	sigB	75	-10	-43
rplM	MamB	sigB	79	-10	-33
fdxD	MamA	sigB	91	-10	-5
fdxD	MamA	sigB	91	-10	-8
echA19	MamA	sigB	89	-10	-7
echA19	MamA	sigB	89	-10	-4
Rv3583c	MamA	sigB	92	-10	-5
Rv3583c	MamA	sigB	92	-10	-8
PE_PGRS60	MamA	sigB	68	-10	-3
Rv3683	MamB	sigB	91	-10	-7
Rv3688c	MamA	sigB	85	-10	-38
Rv3688c	MamA	sigB	85	-10	-41
asd	MamB	sigB	85	-10	-33
Rv3728	MamA	sigB	93	-10	-7
Rv3728	MamA	sigB	93	-10	-4
tcrY	MamA	sigB	93	-10	-38
tcrY	MamA	sigB	93	-10	-41
Rv3779	MamA	sigB	93	-10	-7
Rv3779	MamA	sigB	93	-10	-4
glf	HsdM	sigB	92	-10	-11
PE_PGRS62	MamA	sigB	93	-10	-2
PE_PGRS62	MamA	sigB	87	-10	-38
glf	MamA	sigB	93	-10	-27
glf	MamA	sigB	93	-10	-30
Rv3829c	MamA	sigB	93	-10	-1
Rv3844	MamA	sigB	76	-10	-48
gltB	MamB	sigB	90	-10	-39
PE35	MamA	sigB	68	-10	-48
PE35	MamA	sigB	67	-10	-45
PE36	MamA	sigB	93	-10	-4
PE36	MamA	sigB	93	-10	-7
sigM	MamA	sigB	78	-10	-2
mkl	MamB	sigB	56	-10	-1
Rv0898c	MamA	sigB	24	-10	-3
Rv0898c	MamA	sigB	24	-10	-6
Rv1779c	MamA	sigB	87	-10	-15
Rv1779c	MamA	sigB	87	-10	-18
PPE25	MamA	sigB	90	-10	-33
PPE25	MamA	sigB	90	-10	-30
glnA3	HsdM	sigB	89	-10	-10
Rv2172c	MamB	sigB	43	-10	-33
Rv2280	MamA	sigB	32	-10	-4
Rv2305	MamA	sigB	88	-10	-17
Rv2305	MamA	sigB	88	-10	-14
Rv2315c	MamA	sigB	88	-10	-19
Rv2315c	MamA	sigB	88	-10	-22
Rv2434c	MamA	sigB	24	-10	-49
rbsK	MamB	sigB	24	-10	-45
vapB46	MamB	sigB	27	-10	-48
ephA	MamA	sigB	63	-10	-27
espA	MamA	sigB	64	-10	-29
espA	MamA	sigB	64	-10	-32
Rv3636	MamA	sigB	65	-10	-35
Rv3636	MamA	sigB	65	-10	-32
pitB	MamA	sigB	16	-10	-7
tatA	MamA	sigB	22	-10	-4
tatA	MamA	sigB	22	-10	-7
Rv0296c	MamB	sigB	17	-10	-21
rplW	MamB	sigB	15	-10	-33
PE_PGRS19	MamA	sigB	19	-10	-20
PE_PGRS19	MamA	sigB	19	-10	-23
rpmE	MamB	sigB	32	-10	-47
Rv1760	MamB	sigB	36	-10	-29
dop	MamA	sigB	43	-10	-46
dop	MamA	sigB	43	-10	-49
PPE53	MamA	sigB	17	-10	-48
Rv3160c	MamA	sigB	16	-10	-13
Rv3180c	MamB	sigB	15	-10	-47
glpX	HsdM	sigF	90	-10	-10
lipT	HsdM	sigF	93	-10	-11
espC	HsdM	sigF	65	-10	-28
gyrB	HsdM	sigG	91	-10	-18
TB15.3	HsdM	sigG	62	-10	-17
PE_PGRS33	HsdM	sigG	90	-10	-19
lipT	HsdM	sigG	93	-10	-4
Rv3284	HsdM	sigG	47	-10	-19
Rv3312c	HsdM	sigG	78	-10	-20
Rv0004	MamA	sigI	93	-10	-45
gyrB	HsdM	sigI	91	-10	-18
Rv0007	MamB	sigI	91	-10	-8
Rv0029	HsdM	sigI	91	-10	-12
Rv0039c	MamA	sigI	92	-10	-4
Rv0061c	HsdM	sigI	87	-10	-5
fadD7	MamA	sigI	87	-10	-40
cyp138	MamA	sigI	92	-10	-33
Rv0138	MamA	sigI	93	-10	-7
Rv0247c	MamA	sigI	87	-10	-15
Rv0250c	HsdM	sigI	93	-10	-5
Rv0250c	HsdM	sigI	93	-10	-12
Rv0281	MamA	sigI	88	-10	-36
Rv0306	MamA	sigI	91	-10	-27
Rv0365c	MamA	sigI	92	-10	-4
pks6	MamA	sigI	80	-10	-27
Rv0446c	MamB	sigI	92	-10	0
mazF1	HsdM	sigI	93	-10	-16
Rv0465c	MamA	sigI	87	-10	-4
vapB28	HsdM	sigI	93	-10	-11
vapB28	HsdM	sigI	93	-10	-12
rpmC	HsdM	sigI	32	-10	-26
mmsB	MamA	sigI	85	-10	-3
Rv0767c	MamB	sigI	89	-10	-20
purB	HsdM	sigI	90	-10	-12
purB	HsdM	sigI	90	-10	-5
Rv0799c	MamA	sigI	91	-10	-4
Rv0826	HsdM	sigI	87	-10	-6
PE_PGRS12	MamA	sigI	90	-10	-35
Rv0863	HsdM	sigI	78	-10	-12
PE_PGRS15	MamA	sigI	86	-10	-35
Rv0893c	MamA	sigI	93	-10	-19
Rv0919	HsdM	sigI	93	-10	-27
Rv0942	MamA	sigI	93	-10	-37
Rv0976c	MamA	sigI	90	-10	-36
Rv1036c	MamA	sigI	92	-10	-29
Rv1049	MamA	sigI	91	-10	-4
PE_PGRS20	MamA	sigI	74	-10	-20
PE_PGRS21	HsdM	sigI	80	-10	-19
PE_PGRS21	HsdM	sigI	80	-10	-12
glpX	HsdM	sigI	84	-10	-5
glpX	HsdM	sigI	90	-10	-10
Rv1149	HsdM	sigI	85	-10	-20
PE12	HsdM	sigI	93	-10	-12
PE12	HsdM	sigI	93	-10	-19
Rv1200	MamA	sigI	93	-10	-29
Rv1199c	HsdM	sigI	92	-10	-44
Rv1211	MamA	sigI	91	-10	-41
Rv1219c	HsdM	sigI	93	-10	-26
Rv1230c	HsdM	sigI	93	-10	-4
corA	MamA	sigI	93	-10	-5
Rv1250	MamA	sigI	85	-10	-34
Rv1251c	HsdM	sigI	85	-10	-20
oppB	MamA	sigI	69	-10	-43
lprD	HsdM	sigI	82	-10	-8
Rv1358	MamA	sigI	84	-10	-3
Rv1370c	MamA	sigI	30	-10	-22
Rv1473A	MamA	sigI	27	-10	-47
Rv1482c	MamA	sigI	92	-10	-5
mazE4	MamA	sigI	92	-10	-47
lipL	MamA	sigI	92	-10	-20
mmpL12	HsdM	sigI	91	-10	-4
mmpL12	HsdM	sigI	91	-10	-11
adh	HsdM	sigI	87	-10	-12
bioF1	MamB	sigI	93	-10	-49
Rv1597	MamA	sigI	77	-10	-4
cydC	MamA	sigI	79	-10	-50
TB15.3	HsdM	sigI	62	-10	-17
TB15.3	HsdM	sigI	62	-10	-10
Rv1639c	MamA	sigI	74	-10	-35
Rv1813c	HsdM	sigI	93	-10	-4
Rv1813c	HsdM	sigI	93	-10	-11
Rv1817	MamA	sigI	92	-10	-4
PE_PGRS33	HsdM	sigI	90	-10	-19
Rv1944c	HsdM	sigI	86	-10	-20
Rv1986	MamA	sigI	91	-10	-14
Rv2044c	MamA	sigI	93	-10	-20
lipT	HsdM	sigI	93	-10	-4
Rv2077A	MamB	sigI	87	-10	-28
pafA	HsdM	sigI	88	-10	-19
mshC	MamA	sigI	93	-10	-28
lppL	MamA	sigI	88	-10	-15
Rv2280	MamA	sigI	31	-10	-14
Rv2348c	HsdM	sigI	73	-10	-13
glyS	MamA	sigI	84	-10	-16
Rv2360c	MamA	sigI	89	-10	-42
dnaJ2	MamB	sigI	90	-10	-19
mbtJ	MamA	sigI	93	-10	-21
nadD	MamA	sigI	93	-10	-19
rplU	MamA	sigI	93	-10	-3
Rv2456c	MamA	sigI	92	-10	-17
scoA	HsdM	sigI	67	-10	-49
ldtB	HsdM	sigI	62	-10	-45
bcp	MamA	sigI	66	-10	-49
Rv2556c	MamA	sigI	91	-10	-6
yajC	MamB	sigI	88	-10	-1
Rv2628	MamA	sigI	85	-10	-4
Rv2631	HsdM	sigI	90	-10	-20
Rv2631	HsdM	sigI	90	-10	-13
Rv2638	MamA	sigI	91	-10	-25
Rv2642	MamA	sigI	90	-10	-30
Rv2721c	MamA	sigI	93	-10	-15
pgsA3	HsdM	sigI	90	-10	-41
Rv2825c	HsdM	sigI	93	-10	-5
Rv2825c	HsdM	sigI	93	-10	-12
pks15	MamA	sigI	93	-10	-46
Rv2969c	HsdM	sigI	89	-10	-5
Rv3047c	MamA	sigI	92	-10	-27
tgs1	MamA	sigI	81	-10	-28
tgs3	MamB	sigI	90	-10	-18
rubA	MamA	sigI	89	-10	-40
rubA	MamA	sigI	88	-10	-12
birA	MamA	sigI	43	-10	-42
Rv3284	HsdM	sigI	47	-10	-19
Rv3284	HsdM	sigI	47	-10	-12
Rv3312c	HsdM	sigI	78	-10	-13
Rv3312A	HsdM	sigI	78	-10	-4
Rv3312A	HsdM	sigI	78	-10	-11
trpS	MamA	sigI	93	-10	-43
Rv3378c	MamA	sigI	60	-10	-7
Rv3378c	MamB	sigI	60	-10	-34
htdY	MamB	sigI	75	-10	-43
PE31	HsdM	sigI	88	-10	-48
PE31	HsdM	sigI	88	-10	-41
fdxD	MamA	sigI	91	-10	-5
PE_PGRS53	HsdM	sigI	92	-10	-19
echA19	MamA	sigI	89	-10	-7
PE_PGRS60	MamA	sigI	68	-10	-3
Rv3688c	MamA	sigI	85	-10	-41
asd	MamB	sigI	85	-10	-33
Rv3779	MamA	sigI	93	-10	-4
Rv3780	HsdM	sigI	93	-10	-11
glf	HsdM	sigI	92	-10	-4
PE_PGRS62	MamA	sigI	87	-10	-38
glf	MamA	sigI	93	-10	-27
Rv3844	MamA	sigI	76	-10	-48
PE35	MamA	sigI	67	-10	-48
PE36	MamA	sigI	93	-10	-7
Rv0794c	HsdM	sigI	27	-10	-24
Rv0794c	HsdM	sigI	27	-10	-31
Rv1772	HsdM	sigI	77	-10	-47
PPE25	MamA	sigI	90	-10	-30
Rv2172c	MamB	sigI	43	-10	-33
Rv2280	MamA	sigI	32	-10	-4
Rv2305	MamA	sigI	88	-10	-14
Rv2434c	MamA	sigI	24	-10	-49
Rv3484	HsdM	sigI	90	-10	-12
espC	HsdM	sigI	65	-10	-28
espA	MamA	sigI	64	-10	-29
Rv3636	MamA	sigI	65	-10	-32
tatA	MamA	sigI	22	-10	-4
vapB37	HsdM	sigI	43	-10	-15
PE_PGRS19	MamA	sigI	19	-10	-20
dop	MamA	sigI	43	-10	-46
Rv2277c	HsdM	sigI	18	-10	-31
Rv2277c	HsdM	sigI	18	-10	-24
PPE53	MamA	sigI	17	-10	-48
tgs1	MamA	sigA	81	-35	-28
iniA	MamA	sigB	90	-35	-32
Rv2315c	MamA	sigB	88	-35	-19
pafA	HsdM	sigC	88	-35	-12
clpX	HsdM	sigC	89	-35	0
Rv2733c	HsdM	sigC	93	-35	-38
PE_PGRS15	MamA	sigF	86	-35	-38
PE_PGRS21	HsdM	sigF	80	-35	-12
glpX	HsdM	sigF	89	-35	-10
PE12	HsdM	sigF	93	-35	-12
Rv1358	MamA	sigF	84	-35	-6
lipL	MamA	sigF	92	-35	-23
TB15.3	HsdM	sigF	62	-35	-10
Rv1813c	HsdM	sigF	93	-35	-11
ilvG	MamA	sigF	91	-35	-37
mpt63	MamA	sigF	92	-35	-40
lipT	HsdM	sigF	93	-35	-11
Rv2348c	HsdM	sigF	73	-35	-20
nadD	MamA	sigF	93	-35	-19
clpX	HsdM	sigF	89	-35	0
ldtB	HsdM	sigF	62	-35	-45
Rv2733c	HsdM	sigF	93	-35	-38
argA	HsdM	sigF	93	-35	-13
Rv3127	HsdM	sigF	84	-35	-13
Rv3202c	MamA	sigF	93	-35	-40
rubA	MamA	sigF	88	-35	-12
Rv3312c	HsdM	sigF	78	-35	-13
PE31	HsdM	sigF	88	-35	-41
Rv3779	MamA	sigF	93	-35	-7
glf	HsdM	sigF	92	-35	-11
PPE25	HsdM	sigF	90	-35	-22
PPE25	HsdM	sigF	90	-35	-15
glnA3	HsdM	sigF	89	-35	-10
rbsK	MamB	sigF	24	-35	-45
Rv3484	HsdM	sigF	90	-35	-12
espC	HsdM	sigF	65	-35	-28
espC	HsdM	sigF	65	-35	-35
vapB37	HsdM	sigF	43	-35	-22
mesT	HsdM	sigF	16	-35	-12
Rv2631	HsdM	sigG	90	-35	-13
lipT	HsdM	sigI	93	-35	-4
rpmC	HsdM	sigK	32	-35	-26
Rv1251c	HsdM	sigK	85	-35	-20
lprD	HsdM	sigK	82	-35	-8
Rv2969c	HsdM	sigK	89	-35	-5
