# Supplementary material for: Drivers and sites of diversity in the DNA adenine methylomes of 93 Mycobacterium tuberculosis complex clinical isolates
Source: eLife. 2020 Oct 27;9:e58542. doi: 10.7554/eLife.58542 (PMC7591249; doi:10.7554/eLife.58542)
Supplement: Figure 7—source data 1. [file elife-58542-fig7-data1.csv]

TSSid	logIPD_adj	Activity	Lineage
Rv0004 48	0.732337781953516	barely active	East-Asian
Rv0004 48	0.619333718427139	barely active	East-Asian
Rv0004 48	1.89226414489224	active	East-Asian
Rv0004 48	0	barely active	East-Asian
Rv0004 48	2.13431738281336	active	East-African-Indian
Rv0004 48	0.212264199297846	barely active	East-Asian
Rv0004 48	1.63464620068695	active	Indo-Oceanic
Rv0004 48	0.224604137844727	barely active	East-Asian
Rv0004 48	1.94004908930318	active	Euro-American
Rv0004 48	0	barely active	East-Asian
Rv0004 48	1.44478483004796	active	Euro-American
Rv0004 48	0	barely active	East-Asian
Rv0004 48	1.5586871804152	active	East-African-Indian
Rv0004 48	0	barely active	East-Asian
Rv0004 48	0.0429808803232199	barely active	East-Asian
Rv0004 48	1.21311863415501	active	Indo-Oceanic
Rv0004 48	0	barely active	East-Asian
Rv0004 48	0.379923616477956	barely active	East-Asian
Rv0004 48	0.115085336833602	barely active	East-Asian
Rv0004 48	0.25771760190447	barely active	East-Asian
Rv0004 48	0.0321830077343032	barely active	East-Asian
Rv0004 48	0	barely active	East-Asian
Rv0004 48	1.5542603876379	active	East-African-Indian
Rv0004 48	0	barely active	East-Asian
Rv0004 48	0.147552920203102	barely active	East-Asian
Rv0004 48	0.0412917782759392	barely active	East-Asian
Rv0004 48	0.355213419242741	barely active	East-Asian
Rv0004 48	0.0477705691985918	barely active	East-Asian
Rv0004 48	0	barely active	East-Asian
Rv0004 48	0	barely active	East-Asian
Rv0004 48	0	barely active	East-Asian
Rv0004 48	1.79445374455071	active	Euro-American
Rv0004 48	0	barely active	East-Asian
Rv0004 48	1.43643564131941	active	Euro-American
Rv0004 48	2.05028523361109	active	Euro-American
Rv0004 48	1.79807106000801	active	Euro-American
Rv0004 48	1.90505420873125	active	Euro-American
Rv0004 48	1.61087475426352	active	Euro-American
Rv0004 48	0.465031542120625	barely active	East-Asian
Rv0004 48	0	barely active	East-Asian
Rv0004 48	1.42948406365028	active	Euro-American
Rv0004 48	1.90517141674137	active	Euro-American
Rv0004 48	0	barely active	East-Asian
Rv0004 48	2.01214542298544	active	Euro-American
Rv0004 48	0	barely active	East-Asian
Rv0004 48	2.23134767250055	active	Euro-American
Rv0004 48	1.91569497549604	active	Euro-American
Rv0004 48	0	inactive	Indo-Oceanic
Rv0004 48	0	inactive	Indo-Oceanic
Rv0004 48	0	inactive	Indo-Oceanic
Rv0004 48	2.01587080685165	moderately active	Euro-American
Rv0004 48	1.88717863686683	active	Euro-American
Rv0004 48	1.73820362458349	moderately active	Euro-American
Rv0004 48	1.62200783741904	moderately active	Euro-American
Rv0004 48	0	barely active	East-Asian
Rv0004 48	1.74426733029558	active	Euro-American
Rv0004 48	0.383754957515073	barely active	East-Asian
Rv0004 48	2.42571320646571	active	Euro-American
Rv0004 48	0.0241631312244427	barely active	East-Asian
Rv0004 48	2.12010776418325	active	East-African-Indian
Rv0004 48	1.90105850195959	active	M. Africanum, West African 2
Rv0004 48	1.88181201959472	active	Indo-Oceanic
Rv0004 48	0	inactive	Indo-Oceanic
Rv0004 48	1.74458253103267	active	M. Africanum, West African 1
Rv0004 48	1.99954187229567	active	M. Africanum, West African 1
Rv0004 48	1.95831246654879	active	Euro-American
Rv0004 48	1.70526554851262	active	Euro-American
Rv0004 48	0	barely active	East-Asian
Rv0004 48	1.78931731944028	active	Euro-American
Rv0004 48	1.87060003039493	active	East-African-Indian
Rv0004 48	0.0836931669111741	moderately active	Euro-American
Rv0004 48	1.82704948667419	active	Indo-Oceanic
Rv0004 48	1.70103061641849	active	Euro-American
Rv0004 48	1.40317900486417	active	Euro-American
Rv0004 48	1.6452736396252	active	Euro-American
Rv0004 48	2.04626912197371	active	Euro-American
Rv0004 48	2.21059445425872	active	Euro-American
Rv0004 48	1.65823563106131	active	Euro-American
Rv0004 48	1.87527348132594	active	Lineage 7
Rv0004 48	1.96286680768019	active	Indo-Oceanic
Rv0004 48	2.00759950117352	active	Indo-Oceanic
Rv0004 48	1.6641499729937	active	Indo-Oceanic
Rv0004 48	0	barely active	East-Asian
Rv0004 48	1.62872208476371	active	Indo-Oceanic
Rv0004 48	1.58717255581688	active	East-Asian
Rv0004 48	1.60153910933362	active	Indo-Oceanic
Rv0004 48	1.86041228399813	active	Indo-Oceanic
Rv0004 48	1.75119316235987	active	Indo-Oceanic
Rv0004 48	1.80860552678922	active	Indo-Oceanic
Rv0004 48	1.7324124823761	active	Indo-Oceanic
Rv0004 48	1.68176806401155	active	Indo-Oceanic
Rv0004 48	0	barely active	East-Asian
Rv0004 48	2.07018756030199	active	Euro-American
Rv0004 45	1.40783274498075	barely active	East-Asian
Rv0004 45	1.93966458642466	barely active	East-Asian
Rv0004 45	2.79236503716806	active	East-Asian
Rv0004 45	0.659167639080771	barely active	East-Asian
Rv0004 45	2.79236503716806	active	East-African-Indian
Rv0004 45	1.35637045787203	barely active	East-Asian
Rv0004 45	2.79236503716806	active	Indo-Oceanic
Rv0004 45	0.0394927325877384	barely active	East-Asian
Rv0004 45	2.79236503716806	active	Euro-American
Rv0004 45	0.593234035686041	barely active	East-Asian
Rv0004 45	2.59546828467163	active	Euro-American
Rv0004 45	0.701981390741778	barely active	East-Asian
Rv0004 45	2.79236503716806	active	East-African-Indian
Rv0004 45	0.54457828972004	barely active	East-Asian
Rv0004 45	1.19533478107477	barely active	East-Asian
Rv0004 45	2.79236503716806	active	Indo-Oceanic
Rv0004 45	0.778460504359669	barely active	East-Asian
Rv0004 45	1.27416673863	barely active	East-Asian
Rv0004 45	0.703807305586752	barely active	East-Asian
Rv0004 45	0.952208885229549	barely active	East-Asian
Rv0004 45	0	barely active	East-Asian
Rv0004 45	0	barely active	East-Asian
Rv0004 45	2.79236503716806	active	East-African-Indian
Rv0004 45	0	barely active	East-Asian
Rv0004 45	0.269170626262742	barely active	East-Asian
Rv0004 45	0.949020094825961	barely active	East-Asian
Rv0004 45	0.98139858269041	barely active	East-Asian
Rv0004 45	0.688530908354515	barely active	East-Asian
Rv0004 45	0.403677130468128	barely active	East-Asian
Rv0004 45	0.412873875077492	barely active	East-Asian
Rv0004 45	0.154958979524661	barely active	East-Asian
Rv0004 45	2.79236503716806	active	Euro-American
Rv0004 45	0.287170950090661	barely active	East-Asian
Rv0004 45	2.79236503716806	active	Euro-American
Rv0004 45	2.79236503716806	active	Euro-American
Rv0004 45	2.79236503716806	active	Euro-American
Rv0004 45	2.79236503716806	active	Euro-American
Rv0004 45	2.79236503716806	active	Euro-American
Rv0004 45	0.3416901163456	barely active	East-Asian
Rv0004 45	0.12200757223764	barely active	East-Asian
Rv0004 45	2.79236503716806	active	Euro-American
Rv0004 45	2.79236503716806	active	Euro-American
Rv0004 45	0.950011671252662	barely active	East-Asian
Rv0004 45	2.79236503716806	active	Euro-American
Rv0004 45	0	barely active	East-Asian
Rv0004 45	2.79236503716806	active	Euro-American
Rv0004 45	2.79236503716806	active	Euro-American
Rv0004 45	0	inactive	Indo-Oceanic
Rv0004 45	0	inactive	Indo-Oceanic
Rv0004 45	0	inactive	Indo-Oceanic
Rv0004 45	2.45074619939308	moderately active	Euro-American
Rv0004 45	2.79236503716806	active	Euro-American
Rv0004 45	2.62498835546407	moderately active	Euro-American
Rv0004 45	2.77391613832547	moderately active	Euro-American
Rv0004 45	1.04333670587017	barely active	East-Asian
Rv0004 45	2.79236503716806	active	Euro-American
Rv0004 45	1.13938784592136	barely active	East-Asian
Rv0004 45	2.79236503716806	active	Euro-American
Rv0004 45	0.683836026461942	barely active	East-Asian
Rv0004 45	2.79236503716806	active	East-African-Indian
Rv0004 45	2.79236503716806	active	M. Africanum, West African 2
Rv0004 45	2.79236503716806	active	Indo-Oceanic
Rv0004 45	0.132941748713967	inactive	Indo-Oceanic
Rv0004 45	2.79236503716806	active	M. Africanum, West African 1
Rv0004 45	2.79236503716806	active	M. Africanum, West African 1
Rv0004 45	2.79236503716806	active	Euro-American
Rv0004 45	2.79236503716806	active	Euro-American
Rv0004 45	0.740657927893956	barely active	East-Asian
Rv0004 45	2.67032928322319	active	Euro-American
Rv0004 45	2.79236503716806	active	East-African-Indian
Rv0004 45	1.21636396297971	moderately active	Euro-American
Rv0004 45	2.79236503716806	active	Indo-Oceanic
Rv0004 45	2.79236503716806	active	Euro-American
Rv0004 45	2.79236503716806	active	Euro-American
Rv0004 45	2.79236503716806	active	Euro-American
Rv0004 45	2.79236503716806	active	Euro-American
Rv0004 45	2.79236503716806	active	Euro-American
Rv0004 45	2.79236503716806	active	Euro-American
Rv0004 45	2.79236503716806	active	Lineage 7
Rv0004 45	2.79236503716806	active	Indo-Oceanic
Rv0004 45	2.79236503716806	active	Indo-Oceanic
Rv0004 45	2.79236503716806	active	Indo-Oceanic
Rv0004 45	0	barely active	East-Asian
Rv0004 45	2.69076776975873	active	Indo-Oceanic
Rv0004 45	2.79236503716806	active	East-Asian
Rv0004 45	2.79236503716806	active	Indo-Oceanic
Rv0004 45	2.79236503716806	active	Indo-Oceanic
Rv0004 45	2.79236503716806	active	Indo-Oceanic
Rv0004 45	2.79236503716806	active	Indo-Oceanic
Rv0004 45	2.79236503716806	active	Indo-Oceanic
Rv0004 45	2.79236503716806	active	Indo-Oceanic
Rv0004 45	0.293029502746142	barely active	East-Asian
Rv0004 45	2.76338324420728	active	Euro-American
Rv0039c 4	1.17991615767022	barely active	East-Asian
Rv0039c 4	1.53034231750078	barely active	East-Asian
Rv0039c 4	2.26972984968203	active	East-Asian
Rv0039c 4	1.37480946443793	barely active	East-Asian
Rv0039c 4	2.60807808012207	active	East-African-Indian
Rv0039c 4	1.3688923781267	barely active	East-Asian
Rv0039c 4	1.9260808824304	active	Indo-Oceanic
Rv0039c 4	0.989990771170164	barely active	East-Asian
Rv0039c 4	2.13255425597738	active	Euro-American
Rv0039c 4	0.422937157700649	barely active	East-Asian
Rv0039c 4	2.38732167660083	active	Euro-American
Rv0039c 4	0.493998028416838	barely active	East-Asian
Rv0039c 4	2.27590983926534	active	East-African-Indian
Rv0039c 4	0.738699774109781	barely active	East-Asian
Rv0039c 4	1.11283548061736	barely active	East-Asian
Rv0039c 4	2.46104614759859	active	Indo-Oceanic
Rv0039c 4	0.982637630306974	barely active	East-Asian
Rv0039c 4	1.0673801108648	barely active	East-Asian
Rv0039c 4	0.876129070622706	barely active	East-Asian
Rv0039c 4	0.92775584150501	barely active	East-Asian
Rv0039c 4	0.746827555977134	barely active	East-Asian
Rv0039c 4	0	barely active	East-Asian
Rv0039c 4	2.25372732308945	active	East-African-Indian
Rv0039c 4	0.409275137827616	barely active	East-Asian
Rv0039c 4	0.991098718787035	barely active	East-Asian
Rv0039c 4	1.53199609603754	barely active	East-Asian
Rv0039c 4	0.997717957270838	barely active	East-Asian
Rv0039c 4	0.972156793270355	barely active	East-Asian
Rv0039c 4	0.897173387614256	barely active	East-Asian
Rv0039c 4	0.453845656133798	barely active	East-Asian
Rv0039c 4	0.48667526938325	barely active	East-Asian
Rv0039c 4	2.51630195656176	active	Euro-American
Rv0039c 4	0.316195131810828	barely active	East-Asian
Rv0039c 4	1.7451731629803	active	Euro-American
Rv0039c 4	2.42707526353297	active	Euro-American
Rv0039c 4	2.0961295400678	active	Euro-American
Rv0039c 4	2.18657323007072	active	Euro-American
Rv0039c 4	2.20897217688775	active	Euro-American
Rv0039c 4	1.25805084641702	barely active	East-Asian
Rv0039c 4	0.404995977858657	barely active	East-Asian
Rv0039c 4	2.33678610441915	active	Euro-American
Rv0039c 4	2.1614446177911	active	Euro-American
Rv0039c 4	0.787404133299093	barely active	East-Asian
Rv0039c 4	0.385076605879814	barely active	East-Asian
Rv0039c 4	1.91167359341203	active	Euro-American
Rv0039c 4	2.62892047736564	active	Euro-American
Rv0039c 4	0.0351617933777551	inactive	Indo-Oceanic
Rv0039c 4	0	inactive	Indo-Oceanic
Rv0039c 4	0.202199920000493	inactive	Indo-Oceanic
Rv0039c 4	2.21394483510314	moderately active	Euro-American
Rv0039c 4	2.3393665831775	active	Euro-American
Rv0039c 4	1.86110695825601	moderately active	Euro-American
Rv0039c 4	2.41575746210861	moderately active	Euro-American
Rv0039c 4	0.880724633070752	barely active	East-Asian
Rv0039c 4	2.02170008419313	active	Euro-American
Rv0039c 4	0.804651974733381	barely active	East-Asian
Rv0039c 4	2.3697661015109	active	Euro-American
Rv0039c 4	0.859641654196435	barely active	East-Asian
Rv0039c 4	2.58461766018445	active	East-African-Indian
Rv0039c 4	2.16013023499158	active	M. Africanum, West African 2
Rv0039c 4	2.26500022539835	active	Indo-Oceanic
Rv0039c 4	0	inactive	Indo-Oceanic
Rv0039c 4	2.23238661112538	active	M. Africanum, West African 1
Rv0039c 4	2.00300942780877	active	M. Africanum, West African 1
Rv0039c 4	2.2842652337889	active	Euro-American
Rv0039c 4	2.53043736628833	active	Euro-American
Rv0039c 4	0.563057248783426	barely active	East-Asian
Rv0039c 4	2.50395535378434	active	Euro-American
Rv0039c 4	2.01234973578293	active	East-African-Indian
Rv0039c 4	0.545788574572597	moderately active	Euro-American
Rv0039c 4	2.61656745259918	active	Indo-Oceanic
Rv0039c 4	1.98403266214347	active	Euro-American
Rv0039c 4	1.97342577538309	active	Euro-American
Rv0039c 4	2.03608826697544	active	Euro-American
Rv0039c 4	2.71041546130535	active	Euro-American
Rv0039c 4	2.2319635167863	active	Euro-American
Rv0039c 4	1.74061840670758	active	Euro-American
Rv0039c 4	2.42414652591214	active	Lineage 7
Rv0039c 4	2.25915457338684	active	Indo-Oceanic
Rv0039c 4	2.14487040453329	active	Indo-Oceanic
Rv0039c 4	2.24228905704967	active	Indo-Oceanic
Rv0039c 4	0.806093865359482	barely active	East-Asian
Rv0039c 4	2.22317127415809	active	Indo-Oceanic
Rv0039c 4	2.24397882998158	active	East-Asian
Rv0039c 4	2.18049612053539	active	Indo-Oceanic
Rv0039c 4	2.27354549971334	active	Indo-Oceanic
Rv0039c 4	2.26128624990916	active	Indo-Oceanic
Rv0039c 4	2.25047119942836	active	Indo-Oceanic
Rv0039c 4	2.22158738277173	active	Indo-Oceanic
Rv0039c 4	2.03799728545025	active	Indo-Oceanic
Rv0039c 4	0.439293374138479	barely active	East-Asian
Rv0039c 4	2.31582572585827	active	Euro-American
Rv0039c 7	1.75499489029171	barely active	East-Asian
Rv0039c 7	2.43010532660716	barely active	East-Asian
Rv0039c 7	2.79236503716806	active	East-Asian
Rv0039c 7	1.45400163185492	barely active	East-Asian
Rv0039c 7	2.79236503716806	active	East-African-Indian
Rv0039c 7	1.40813188556177	barely active	East-Asian
Rv0039c 7	2.79236503716806	active	Indo-Oceanic
Rv0039c 7	1.13836033711033	barely active	East-Asian
Rv0039c 7	2.79236503716806	active	Euro-American
Rv0039c 7	0.820293317568937	barely active	East-Asian
Rv0039c 7	2.79236503716806	active	Euro-American
Rv0039c 7	1.07337409411941	barely active	East-Asian
Rv0039c 7	2.79236503716806	active	East-African-Indian
Rv0039c 7	1.16039307003894	barely active	East-Asian
Rv0039c 7	1.60150582111507	barely active	East-Asian
Rv0039c 7	2.79236503716806	active	Indo-Oceanic
Rv0039c 7	0.750223369748976	barely active	East-Asian
Rv0039c 7	1.47248973521403	barely active	East-Asian
Rv0039c 7	1.16024923568967	barely active	East-Asian
Rv0039c 7	0.740151672827872	barely active	East-Asian
Rv0039c 7	0.946636375738457	barely active	East-Asian
Rv0039c 7	0.312108807385182	barely active	East-Asian
Rv0039c 7	2.79236503716806	active	East-African-Indian
Rv0039c 7	1.39827760983864	barely active	East-Asian
Rv0039c 7	1.27738753151185	barely active	East-Asian
Rv0039c 7	1.65984429511486	barely active	East-Asian
Rv0039c 7	1.17560586440309	barely active	East-Asian
Rv0039c 7	1.03531767863163	barely active	East-Asian
Rv0039c 7	1.37625197016986	barely active	East-Asian
Rv0039c 7	0.338560785229831	barely active	East-Asian
Rv0039c 7	0.115946666611378	barely active	East-Asian
Rv0039c 7	2.79236503716806	active	Euro-American
Rv0039c 7	0.223484757996054	barely active	East-Asian
Rv0039c 7	2.79236503716806	active	Euro-American
Rv0039c 7	2.79236503716806	active	Euro-American
Rv0039c 7	2.79236503716806	active	Euro-American
Rv0039c 7	2.79236503716806	active	Euro-American
Rv0039c 7	2.79236503716806	active	Euro-American
Rv0039c 7	1.73055055286495	barely active	East-Asian
Rv0039c 7	0.49367522983037	barely active	East-Asian
Rv0039c 7	2.79236503716806	active	Euro-American
Rv0039c 7	2.79236503716806	active	Euro-American
Rv0039c 7	1.233698506011	barely active	East-Asian
Rv0039c 7	0.513878376906862	barely active	East-Asian
Rv0039c 7	2.79236503716806	active	Euro-American
Rv0039c 7	2.79236503716806	active	Euro-American
Rv0039c 7	0.0147802933797344	inactive	Indo-Oceanic
Rv0039c 7	0.221487989273247	inactive	Indo-Oceanic
Rv0039c 7	0	inactive	Indo-Oceanic
Rv0039c 7	2.79236503716806	moderately active	Euro-American
Rv0039c 7	2.79236503716806	active	Euro-American
Rv0039c 7	2.79236503716806	moderately active	Euro-American
Rv0039c 7	2.79236503716806	moderately active	Euro-American
Rv0039c 7	1.49579388892274	barely active	East-Asian
Rv0039c 7	2.79236503716806	active	Euro-American
Rv0039c 7	1.42074208669986	barely active	East-Asian
Rv0039c 7	2.79236503716806	active	Euro-American
Rv0039c 7	1.1883970205889	barely active	East-Asian
Rv0039c 7	2.79236503716806	active	East-African-Indian
Rv0039c 7	2.79236503716806	active	M. Africanum, West African 2
Rv0039c 7	2.79236503716806	active	Indo-Oceanic
Rv0039c 7	0.164790614753307	inactive	Indo-Oceanic
Rv0039c 7	2.79236503716806	active	M. Africanum, West African 1
Rv0039c 7	2.79236503716806	active	M. Africanum, West African 1
Rv0039c 7	2.79236503716806	active	Euro-American
Rv0039c 7	2.79236503716806	active	Euro-American
Rv0039c 7	0.414129328636154	barely active	East-Asian
Rv0039c 7	2.79236503716806	active	Euro-American
Rv0039c 7	2.79236503716806	active	East-African-Indian
Rv0039c 7	1.12363667885027	moderately active	Euro-American
Rv0039c 7	2.79236503716806	active	Indo-Oceanic
Rv0039c 7	2.79236503716806	active	Euro-American
Rv0039c 7	2.79236503716806	active	Euro-American
Rv0039c 7	2.79236503716806	active	Euro-American
Rv0039c 7	2.79236503716806	active	Euro-American
Rv0039c 7	2.79236503716806	active	Euro-American
Rv0039c 7	2.79236503716806	active	Euro-American
Rv0039c 7	2.79236503716806	active	Lineage 7
Rv0039c 7	2.79236503716806	active	Indo-Oceanic
Rv0039c 7	2.79236503716806	active	Indo-Oceanic
Rv0039c 7	2.79236503716806	active	Indo-Oceanic
Rv0039c 7	0.919954327740001	barely active	East-Asian
Rv0039c 7	2.79236503716806	active	Indo-Oceanic
Rv0039c 7	2.79236503716806	active	East-Asian
Rv0039c 7	2.79236503716806	active	Indo-Oceanic
Rv0039c 7	2.79236503716806	active	Indo-Oceanic
Rv0039c 7	2.79236503716806	active	Indo-Oceanic
Rv0039c 7	2.79236503716806	active	Indo-Oceanic
Rv0039c 7	2.79236503716806	active	Indo-Oceanic
Rv0039c 7	2.79236503716806	active	Indo-Oceanic
Rv0039c 7	0.353783533825238	barely active	East-Asian
Rv0039c 7	2.79236503716806	active	Euro-American
Rv0102 7	1.05945060962668	barely active	East-Asian
Rv0102 7	1.35928935519916	barely active	East-Asian
Rv0102 7	2.79236503716806	active	East-Asian
Rv0102 7	0.833007131432599	barely active	East-Asian
Rv0102 7	2.79236503716806	active	East-African-Indian
Rv0102 7	0.722993894020858	barely active	East-Asian
Rv0102 7	2.79236503716806	active	Indo-Oceanic
Rv0102 7	1.10524009268237	barely active	East-Asian
Rv0102 7	2.79236503716806	active	Euro-American
Rv0102 7	0.284875639342757	barely active	East-Asian
Rv0102 7	2.79236503716806	active	Euro-American
Rv0102 7	0.564387356308236	barely active	East-Asian
Rv0102 7	2.79236503716806	active	East-African-Indian
Rv0102 7	0.186503028624908	barely active	East-Asian
Rv0102 7	0.627007477644127	barely active	East-Asian
Rv0102 7	2.79236503716806	active	Indo-Oceanic
Rv0102 7	0	barely active	East-Asian
Rv0102 7	1.02057799223618	barely active	East-Asian
Rv0102 7	1.12072087150303	barely active	East-Asian
Rv0102 7	0.175640088591595	barely active	East-Asian
Rv0102 7	0.416209878383631	barely active	East-Asian
Rv0102 7	0	barely active	East-Asian
Rv0102 7	2.56333397126336	active	East-African-Indian
Rv0102 7	0.603217020388464	barely active	East-Asian
Rv0102 7	0.675306497224825	barely active	East-Asian
Rv0102 7	0.888978294330361	barely active	East-Asian
Rv0102 7	0	barely active	East-Asian
Rv0102 7	0.877663213582885	barely active	East-Asian
Rv0102 7	0.169483852520645	barely active	East-Asian
Rv0102 7	0.253596117834688	barely active	East-Asian
Rv0102 7	0.251217107901881	barely active	East-Asian
Rv0102 7	2.74866466665314	active	Euro-American
Rv0102 7	0	barely active	East-Asian
Rv0102 7	2.79236503716806	active	Euro-American
Rv0102 7	2.79236503716806	active	Euro-American
Rv0102 7	2.79236503716806	active	Euro-American
Rv0102 7	2.79236503716806	active	Euro-American
Rv0102 7	2.79236503716806	active	Euro-American
Rv0102 7	0.329133944478507	barely active	East-Asian
Rv0102 7	0	barely active	East-Asian
Rv0102 7	2.79236503716806	active	Euro-American
Rv0102 7	2.79236503716806	active	Euro-American
Rv0102 7	0.573578645721106	barely active	East-Asian
Rv0102 7	2.79236503716806	active	Euro-American
Rv0102 7	0	barely active	East-Asian
Rv0102 7	2.79236503716806	active	Euro-American
Rv0102 7	2.79236503716806	active	Euro-American
Rv0102 7	0	inactive	Indo-Oceanic
Rv0102 7	0	inactive	Indo-Oceanic
Rv0102 7	0.102758266785295	inactive	Indo-Oceanic
Rv0102 7	2.62685530983661	moderately active	Euro-American
Rv0102 7	2.79236503716806	active	Euro-American
Rv0102 7	2.79021442316004	moderately active	Euro-American
Rv0102 7	2.20254003622207	moderately active	Euro-American
Rv0102 7	0.220159446309317	barely active	East-Asian
Rv0102 7	2.79236503716806	active	Euro-American
Rv0102 7	0.645857088653492	barely active	East-Asian
Rv0102 7	2.79236503716806	active	Euro-American
Rv0102 7	1.0613101127843	barely active	East-Asian
Rv0102 7	2.79236503716806	active	East-African-Indian
Rv0102 7	2.79236503716806	active	M. Africanum, West African 2
Rv0102 7	2.79236503716806	active	Indo-Oceanic
Rv0102 7	0	inactive	Indo-Oceanic
Rv0102 7	2.79236503716806	active	M. Africanum, West African 1
Rv0102 7	2.79236503716806	active	M. Africanum, West African 1
Rv0102 7	2.79236503716806	active	Euro-American
Rv0102 7	2.79236503716806	active	Euro-American
Rv0102 7	0.414129328636154	barely active	East-Asian
Rv0102 7	2.79236503716806	active	Euro-American
Rv0102 7	2.79236503716806	active	East-African-Indian
Rv0102 7	0.749668767145574	moderately active	Euro-American
Rv0102 7	2.79236503716806	active	Indo-Oceanic
Rv0102 7	2.79236503716806	active	Euro-American
Rv0102 7	2.79236503716806	active	Euro-American
Rv0102 7	2.79236503716806	active	Euro-American
Rv0102 7	2.79236503716806	active	Euro-American
Rv0102 7	2.79236503716806	active	Euro-American
Rv0102 7	2.79236503716806	active	Euro-American
Rv0102 7	2.79236503716806	active	Lineage 7
Rv0102 7	2.79236503716806	active	Indo-Oceanic
Rv0102 7	2.79236503716806	active	Indo-Oceanic
Rv0102 7	2.79236503716806	active	Indo-Oceanic
Rv0102 7	0.713264514359327	barely active	East-Asian
Rv0102 7	2.79236503716806	active	Indo-Oceanic
Rv0102 7	2.79236503716806	active	East-Asian
Rv0102 7	2.79236503716806	active	Indo-Oceanic
Rv0102 7	2.79236503716806	active	Indo-Oceanic
Rv0102 7	2.79236503716806	active	Indo-Oceanic
Rv0102 7	2.79236503716806	active	Indo-Oceanic
Rv0102 7	2.79236503716806	active	Indo-Oceanic
Rv0102 7	2.79236503716806	active	Indo-Oceanic
Rv0102 7	0.556262777563763	barely active	East-Asian
Rv0102 7	2.69933173504394	active	Euro-American
Rv0102 4	0.718841939469293	barely active	East-Asian
Rv0102 4	1.37769057000341	barely active	East-Asian
Rv0102 4	2.79236503716806	active	East-Asian
Rv0102 4	1.07976466370152	barely active	East-Asian
Rv0102 4	2.79236503716806	active	East-African-Indian
Rv0102 4	1.16312637845086	barely active	East-Asian
Rv0102 4	2.79236503716806	active	Indo-Oceanic
Rv0102 4	0.918638337713353	barely active	East-Asian
Rv0102 4	2.79236503716806	active	Euro-American
Rv0102 4	0.435158752121473	barely active	East-Asian
Rv0102 4	2.31399822251261	active	Euro-American
Rv0102 4	0.858773442779984	barely active	East-Asian
Rv0102 4	2.68180308411242	active	East-African-Indian
Rv0102 4	0.530725144477174	barely active	East-Asian
Rv0102 4	1.33255128701	barely active	East-Asian
Rv0102 4	2.73804355209033	active	Indo-Oceanic
Rv0102 4	0.596139537242057	barely active	East-Asian
Rv0102 4	1.41823003476416	barely active	East-Asian
Rv0102 4	1.04346029576953	barely active	East-Asian
Rv0102 4	0.878420980876286	barely active	East-Asian
Rv0102 4	0.110815517580037	barely active	East-Asian
Rv0102 4	0.367962042118699	barely active	East-Asian
Rv0102 4	2.79236503716806	active	East-African-Indian
Rv0102 4	0.498703919573688	barely active	East-Asian
Rv0102 4	0.288062581607932	barely active	East-Asian
Rv0102 4	1.1637351851887	barely active	East-Asian
Rv0102 4	0.882755804133734	barely active	East-Asian
Rv0102 4	0.968308578022886	barely active	East-Asian
Rv0102 4	0.816111269568256	barely active	East-Asian
Rv0102 4	1.09317044530464	barely active	East-Asian
Rv0102 4	0.389623303378989	barely active	East-Asian
Rv0102 4	2.17627170852869	active	Euro-American
Rv0102 4	0.372548400015364	barely active	East-Asian
Rv0102 4	2.79236503716806	active	Euro-American
Rv0102 4	2.29046148618336	active	Euro-American
Rv0102 4	2.79236503716806	active	Euro-American
Rv0102 4	2.79236503716806	active	Euro-American
Rv0102 4	2.68952975150872	active	Euro-American
Rv0102 4	0.771033396107828	barely active	East-Asian
Rv0102 4	0.352891454467728	barely active	East-Asian
Rv0102 4	2.60295859174902	active	Euro-American
Rv0102 4	2.68117692866132	active	Euro-American
Rv0102 4	0.798998759755122	barely active	East-Asian
Rv0102 4	2.79236503716806	active	Euro-American
Rv0102 4	0.661150306784766	barely active	East-Asian
Rv0102 4	2.79236503716806	active	Euro-American
Rv0102 4	2.58419792360129	active	Euro-American
Rv0102 4	0.210537588212716	inactive	Indo-Oceanic
Rv0102 4	0.00392725016634159	inactive	Indo-Oceanic
Rv0102 4	0	inactive	Indo-Oceanic
Rv0102 4	2.68203063458515	moderately active	Euro-American
Rv0102 4	2.79236503716806	active	Euro-American
Rv0102 4	2.14832485435405	moderately active	Euro-American
Rv0102 4	2.39427363379682	moderately active	Euro-American
Rv0102 4	0.712799763712133	barely active	East-Asian
Rv0102 4	2.79236503716806	active	Euro-American
Rv0102 4	0.96423703525356	barely active	East-Asian
Rv0102 4	2.79236503716806	active	Euro-American
Rv0102 4	1.05089349683896	barely active	East-Asian
Rv0102 4	2.79236503716806	active	East-African-Indian
Rv0102 4	2.79236503716806	active	M. Africanum, West African 2
Rv0102 4	2.79236503716806	active	Indo-Oceanic
Rv0102 4	0	inactive	Indo-Oceanic
Rv0102 4	2.79236503716806	active	M. Africanum, West African 1
Rv0102 4	2.79236503716806	active	M. Africanum, West African 1
Rv0102 4	2.79236503716806	active	Euro-American
Rv0102 4	2.79236503716806	active	Euro-American
Rv0102 4	0.741532553589667	barely active	East-Asian
Rv0102 4	2.72027988454884	active	Euro-American
Rv0102 4	2.51662109956773	active	East-African-Indian
Rv0102 4	0.629489341314779	moderately active	Euro-American
Rv0102 4	2.79236503716806	active	Indo-Oceanic
Rv0102 4	2.79236503716806	active	Euro-American
Rv0102 4	2.79236503716806	active	Euro-American
Rv0102 4	2.71003679354813	active	Euro-American
Rv0102 4	2.79093284037148	active	Euro-American
Rv0102 4	2.78407130015623	active	Euro-American
Rv0102 4	2.71405872027925	active	Euro-American
Rv0102 4	2.56288915910944	active	Lineage 7
Rv0102 4	2.79236503716806	active	Indo-Oceanic
Rv0102 4	2.79236503716806	active	Indo-Oceanic
Rv0102 4	2.79236503716806	active	Indo-Oceanic
Rv0102 4	0.557273318745389	barely active	East-Asian
Rv0102 4	2.79236503716806	active	Indo-Oceanic
Rv0102 4	2.51925395790745	active	East-Asian
Rv0102 4	2.79236503716806	active	Indo-Oceanic
Rv0102 4	2.79236503716806	active	Indo-Oceanic
Rv0102 4	2.79236503716806	active	Indo-Oceanic
Rv0102 4	2.79236503716806	active	Indo-Oceanic
Rv0102 4	2.77681986966491	active	Indo-Oceanic
Rv0102 4	2.63383204796068	active	Indo-Oceanic
Rv0102 4	0.2095140497857	barely active	East-Asian
Rv0102 4	2.67049060715763	active	Euro-American
Rv0108c 34	0	barely active	East-Asian
Rv0108c 34	0.620331088007746	barely active	East-Asian
Rv0108c 34	2.79236503716806	active	East-Asian
Rv0108c 34	1.08392029319283	barely active	East-Asian
Rv0108c 34	2.67577341266335	active	East-African-Indian
Rv0108c 34	0.141742507991438	barely active	East-Asian
Rv0108c 34	2.79236503716806	active	Indo-Oceanic
Rv0108c 34	0.429627560334649	barely active	East-Asian
Rv0108c 34	2.79236503716806	active	Euro-American
Rv0108c 34	0.679821720682132	barely active	East-Asian
Rv0108c 34	2.45273207327774	active	Euro-American
Rv0108c 34	0.0550673228270015	barely active	East-Asian
Rv0108c 34	2.53899574325334	active	East-African-Indian
Rv0108c 34	0	barely active	East-Asian
Rv0108c 34	0.554041280438952	barely active	East-Asian
Rv0108c 34	2.63621931579946	active	Indo-Oceanic
Rv0108c 34	0.504021335253625	barely active	East-Asian
Rv0108c 34	1.00413258571789	barely active	East-Asian
Rv0108c 34	0.77075082889796	barely active	East-Asian
Rv0108c 34	0.178406522882972	barely active	East-Asian
Rv0108c 34	0.364846377760024	barely active	East-Asian
Rv0108c 34	0.480978821547656	barely active	East-Asian
Rv0108c 34	2.60249559519274	active	East-African-Indian
Rv0108c 34	0	barely active	East-Asian
Rv0108c 34	0.216233594359353	barely active	East-Asian
Rv0108c 34	0.977764395140088	barely active	East-Asian
Rv0108c 34	0	barely active	East-Asian
Rv0108c 34	0.201231666851503	barely active	East-Asian
Rv0108c 34	0.816979578376224	barely active	East-Asian
Rv0108c 34	0.254921515301255	barely active	East-Asian
Rv0108c 34	0.381705709781707	barely active	East-Asian
Rv0108c 34	2.79236503716806	active	Euro-American
Rv0108c 34	0.114800702230954	barely active	East-Asian
Rv0108c 34	2.60273940296242	active	Euro-American
Rv0108c 34	2.79236503716806	active	Euro-American
Rv0108c 34	2.51046924245715	active	Euro-American
Rv0108c 34	2.61859205595468	active	Euro-American
Rv0108c 34	2.53699967367154	active	Euro-American
Rv0108c 34	0	barely active	East-Asian
Rv0108c 34	0.283517751427066	barely active	East-Asian
Rv0108c 34	2.44677541553442	active	Euro-American
Rv0108c 34	2.79236503716806	active	Euro-American
Rv0108c 34	0.370980093749286	barely active	East-Asian
Rv0108c 34	2.36673859370084	active	Euro-American
Rv0108c 34	0.255969003250936	barely active	East-Asian
Rv0108c 34	2.73508594784566	active	Euro-American
Rv0108c 34	2.42846211127991	active	Euro-American
Rv0108c 34	0.404302336402146	inactive	Indo-Oceanic
Rv0108c 34	0	inactive	Indo-Oceanic
Rv0108c 34	0	inactive	Indo-Oceanic
Rv0108c 34	1.3161811251407	moderately active	Euro-American
Rv0108c 34	1.45067403141914	moderately active	Euro-American
Rv0108c 34	1.66542500775909	moderately active	Euro-American
Rv0108c 34	0.197198297866006	barely active	East-Asian
Rv0108c 34	2.79236503716806	active	Euro-American
Rv0108c 34	0.247816300314509	barely active	East-Asian
Rv0108c 34	2.6936324600711	active	Euro-American
Rv0108c 34	0.665745569479046	barely active	East-Asian
Rv0108c 34	2.79236503716806	active	East-African-Indian
Rv0108c 34	2.48451269617547	active	M. Africanum, West African 2
Rv0108c 34	2.56795182885579	active	Indo-Oceanic
Rv0108c 34	0	inactive	Indo-Oceanic
Rv0108c 34	2.72487957568424	active	M. Africanum, West African 1
Rv0108c 34	2.47279398551981	active	M. Africanum, West African 1
Rv0108c 34	2.45953905922345	active	Euro-American
Rv0108c 34	2.79236503716806	active	Euro-American
Rv0108c 34	0.271239942320603	barely active	East-Asian
Rv0108c 34	2.46308908711929	active	Euro-American
Rv0108c 34	2.09755739056051	active	East-African-Indian
Rv0108c 34	0.751428151559827	moderately active	Euro-American
Rv0108c 34	2.53007907612137	active	Indo-Oceanic
Rv0108c 34	2.63018938717935	active	Euro-American
Rv0108c 34	2.77578754131055	active	Euro-American
Rv0108c 34	2.53331031603376	active	Euro-American
Rv0108c 34	2.68156730795328	active	Euro-American
Rv0108c 34	2.50378365813614	active	Euro-American
Rv0108c 34	1.6201090074025	active	Euro-American
Rv0108c 34	2.59619113426027	active	Lineage 7
Rv0108c 34	2.35235770492086	active	Indo-Oceanic
Rv0108c 34	2.79236503716806	active	Indo-Oceanic
Rv0108c 34	2.52389821991678	active	Indo-Oceanic
Rv0108c 34	0.28562697830085	barely active	East-Asian
Rv0108c 34	2.66031520945903	active	Indo-Oceanic
Rv0108c 34	2.44078775335884	active	East-Asian
Rv0108c 34	2.49962393978979	active	Indo-Oceanic
Rv0108c 34	2.69728209098678	active	Indo-Oceanic
Rv0108c 34	2.60290084269908	active	Indo-Oceanic
Rv0108c 34	2.79236503716806	active	Indo-Oceanic
Rv0108c 34	2.37978464776474	active	Indo-Oceanic
Rv0108c 34	2.63312547948314	active	Indo-Oceanic
Rv0108c 34	0.0378494322981564	barely active	East-Asian
Rv0108c 34	2.40551280349582	active	Euro-American
Rv0108c 37	0.585400441042593	barely active	East-Asian
Rv0108c 37	0.633234535243401	barely active	East-Asian
Rv0108c 37	2.79236503716806	active	East-Asian
Rv0108c 37	1.56568683681341	barely active	East-Asian
Rv0108c 37	2.67088457355305	active	East-African-Indian
Rv0108c 37	0.0936953335843289	barely active	East-Asian
Rv0108c 37	2.79236503716806	active	Indo-Oceanic
Rv0108c 37	0.253272023619478	barely active	East-Asian
Rv0108c 37	2.79236503716806	active	Euro-American
Rv0108c 37	0.191029351454764	barely active	East-Asian
Rv0108c 37	2.79236503716806	active	Euro-American
Rv0108c 37	0	barely active	East-Asian
Rv0108c 37	2.79236503716806	active	East-African-Indian
Rv0108c 37	0.231241343390193	barely active	East-Asian
Rv0108c 37	0.57360354681747	barely active	East-Asian
Rv0108c 37	2.79236503716806	active	Indo-Oceanic
Rv0108c 37	0.0536769672388288	barely active	East-Asian
Rv0108c 37	0.280387942927042	barely active	East-Asian
Rv0108c 37	0.484228070141797	barely active	East-Asian
Rv0108c 37	0.134918985114225	barely active	East-Asian
Rv0108c 37	0.287965789636572	barely active	East-Asian
Rv0108c 37	0	barely active	East-Asian
Rv0108c 37	2.79236503716806	active	East-African-Indian
Rv0108c 37	0.593099902904577	barely active	East-Asian
Rv0108c 37	0.0520508335598552	barely active	East-Asian
Rv0108c 37	0.599471677135376	barely active	East-Asian
Rv0108c 37	0.270763097443429	barely active	East-Asian
Rv0108c 37	0.75078883144146	barely active	East-Asian
Rv0108c 37	0.526604652373271	barely active	East-Asian
Rv0108c 37	0.654977623041685	barely active	East-Asian
Rv0108c 37	0	barely active	East-Asian
Rv0108c 37	2.79236503716806	active	Euro-American
Rv0108c 37	0.696087544808712	barely active	East-Asian
Rv0108c 37	2.79236503716806	active	Euro-American
Rv0108c 37	2.79236503716806	active	Euro-American
Rv0108c 37	2.79236503716806	active	Euro-American
Rv0108c 37	2.79236503716806	active	Euro-American
Rv0108c 37	2.79236503716806	active	Euro-American
Rv0108c 37	0.911572043784116	barely active	East-Asian
Rv0108c 37	0	barely active	East-Asian
Rv0108c 37	2.79236503716806	active	Euro-American
Rv0108c 37	2.79236503716806	active	Euro-American
Rv0108c 37	0.389723816089984	barely active	East-Asian
Rv0108c 37	2.79236503716806	active	Euro-American
Rv0108c 37	0	barely active	East-Asian
Rv0108c 37	2.67320368317291	active	Euro-American
Rv0108c 37	2.79236503716806	active	Euro-American
Rv0108c 37	0.0044805400088798	inactive	Indo-Oceanic
Rv0108c 37	0.510034330176258	inactive	Indo-Oceanic
Rv0108c 37	0	inactive	Indo-Oceanic
Rv0108c 37	1.460977141457	moderately active	Euro-American
Rv0108c 37	2.00313906513812	moderately active	Euro-American
Rv0108c 37	2.02179874786626	moderately active	Euro-American
Rv0108c 37	0.10563105828293	barely active	East-Asian
Rv0108c 37	2.79236503716806	active	Euro-American
Rv0108c 37	0.327887007334813	barely active	East-Asian
Rv0108c 37	2.79236503716806	active	Euro-American
Rv0108c 37	0.28221904294542	barely active	East-Asian
Rv0108c 37	2.79236503716806	active	East-African-Indian
Rv0108c 37	2.79236503716806	active	M. Africanum, West African 2
Rv0108c 37	2.79236503716806	active	Indo-Oceanic
Rv0108c 37	0.0562267825731544	inactive	Indo-Oceanic
Rv0108c 37	2.79236503716806	active	M. Africanum, West African 1
Rv0108c 37	2.79236503716806	active	M. Africanum, West African 1
Rv0108c 37	2.79236503716806	active	Euro-American
Rv0108c 37	2.79236503716806	active	Euro-American
Rv0108c 37	0	barely active	East-Asian
Rv0108c 37	2.79236503716806	active	Euro-American
Rv0108c 37	2.79236503716806	active	East-African-Indian
Rv0108c 37	0.249733479052586	moderately active	Euro-American
Rv0108c 37	2.79236503716806	active	Indo-Oceanic
Rv0108c 37	2.79236503716806	active	Euro-American
Rv0108c 37	2.79236503716806	active	Euro-American
Rv0108c 37	2.79236503716806	active	Euro-American
Rv0108c 37	2.79236503716806	active	Euro-American
Rv0108c 37	2.79236503716806	active	Euro-American
Rv0108c 37	2.68021502886955	active	Euro-American
Rv0108c 37	2.79236503716806	active	Lineage 7
Rv0108c 37	2.79236503716806	active	Indo-Oceanic
Rv0108c 37	2.79236503716806	active	Indo-Oceanic
Rv0108c 37	2.79236503716806	active	Indo-Oceanic
Rv0108c 37	0.234096677660768	barely active	East-Asian
Rv0108c 37	2.79236503716806	active	Indo-Oceanic
Rv0108c 37	2.79236503716806	active	East-Asian
Rv0108c 37	2.79236503716806	active	Indo-Oceanic
Rv0108c 37	2.79236503716806	active	Indo-Oceanic
Rv0108c 37	2.79236503716806	active	Indo-Oceanic
Rv0108c 37	2.79236503716806	active	Indo-Oceanic
Rv0108c 37	2.79236503716806	active	Indo-Oceanic
Rv0108c 37	2.79236503716806	active	Indo-Oceanic
Rv0108c 37	0	barely active	East-Asian
Rv0108c 37	2.79236503716806	active	Euro-American
fadD7 40	0.410633551608598	barely active	East-Asian
fadD7 40	0	barely active	East-Asian
fadD7 40	2.53047054294333	active	East-Asian
fadD7 40	0.363458540101402	barely active	East-Asian
fadD7 40	2.38594138776633	active	East-African-Indian
fadD7 40	0.994057017292744	barely active	East-Asian
fadD7 40	2.54470137731819	active	Indo-Oceanic
fadD7 40	0.818769131611909	barely active	East-Asian
fadD7 40	2.62435656634221	active	Euro-American
fadD7 40	0.251337524566083	barely active	East-Asian
fadD7 40	2.21757539241374	active	Euro-American
fadD7 40	0.0886850390298144	barely active	East-Asian
fadD7 40	2.47071625849721	active	East-African-Indian
fadD7 40	0.00374130841721445	barely active	East-Asian
fadD7 40	0.405862792637034	barely active	East-Asian
fadD7 40	2.23419918852935	active	Indo-Oceanic
fadD7 40	0.0977647215169912	barely active	East-Asian
fadD7 40	0.41879413840415	barely active	East-Asian
fadD7 40	0.338284183591209	barely active	East-Asian
fadD7 40	0.223303060857295	barely active	East-Asian
fadD7 40	0.21995601050954	barely active	East-Asian
fadD7 40	0.53585650833364	barely active	East-Asian
fadD7 40	2.02326800851652	active	East-African-Indian
fadD7 40	1.01143325381129	barely active	East-Asian
fadD7 40	0.29305893306365	barely active	East-Asian
fadD7 40	0.169497010183881	barely active	East-Asian
fadD7 40	0.00157646462804018	barely active	East-Asian
fadD7 40	0.0593935528376769	barely active	East-Asian
fadD7 40	0.10411684860922	barely active	East-Asian
fadD7 40	0	barely active	East-Asian
fadD7 40	0.162900440169256	barely active	East-Asian
fadD7 40	0.338765543386156	barely active	East-Asian
fadD7 40	2.79236503716806	active	Euro-American
fadD7 40	2.64737441298807	active	Euro-American
fadD7 40	2.00692157335864	active	Euro-American
fadD7 40	2.18688662097906	active	Euro-American
fadD7 40	0.259375027364406	barely active	East-Asian
fadD7 40	0.397353988528785	barely active	East-Asian
fadD7 40	2.08614462886347	active	Euro-American
fadD7 40	2.55449530363057	active	Euro-American
fadD7 40	0.0927733762912419	barely active	East-Asian
fadD7 40	2.13947746147716	active	Euro-American
fadD7 40	0.167354616077368	barely active	East-Asian
fadD7 40	2.07774701282455	active	Euro-American
fadD7 40	2.79236503716806	active	Euro-American
fadD7 40	0.0609504748126605	inactive	Indo-Oceanic
fadD7 40	0.532551766737686	inactive	Indo-Oceanic
fadD7 40	0.418184540941324	inactive	Indo-Oceanic
fadD7 40	2.77711040531551	active	Euro-American
fadD7 40	1.18127305950444	moderately active	Euro-American
fadD7 40	0.720026082441008	moderately active	Euro-American
fadD7 40	0.0932473338270975	barely active	East-Asian
fadD7 40	2.77123021253673	active	Euro-American
fadD7 40	0.451479043486641	barely active	East-Asian
fadD7 40	2.63479573936996	active	Euro-American
fadD7 40	0.591026216099341	barely active	East-Asian
fadD7 40	2.65372658413923	active	East-African-Indian
fadD7 40	2.41732663684947	active	M. Africanum, West African 2
fadD7 40	2.36373303638212	active	Indo-Oceanic
fadD7 40	0.0897949567963098	inactive	Indo-Oceanic
fadD7 40	2.68225845290092	active	M. Africanum, West African 1
fadD7 40	2.28743446174538	active	M. Africanum, West African 1
fadD7 40	2.41536737774917	active	Euro-American
fadD7 40	1.96868156922522	active	Euro-American
fadD7 40	0.517827994790429	barely active	East-Asian
fadD7 40	1.97581432320129	active	East-African-Indian
fadD7 40	0.509860480624376	moderately active	Euro-American
fadD7 40	2.20976336890514	active	Euro-American
fadD7 40	2.63686977052721	active	Euro-American
fadD7 40	2.21478696730894	active	Euro-American
fadD7 40	1.79845124497706	active	Euro-American
fadD7 40	1.94518688605466	active	Euro-American
fadD7 40	2.36390509473798	active	Euro-American
fadD7 40	1.72131852171393	active	Lineage 7
fadD7 40	2.40454392511799	active	Indo-Oceanic
fadD7 40	2.57957733980359	active	Indo-Oceanic
fadD7 40	0.43871439726924	barely active	East-Asian
fadD7 40	2.79236503716806	active	Indo-Oceanic
fadD7 40	2.34958181687082	active	East-Asian
fadD7 40	2.54858568807364	active	Indo-Oceanic
fadD7 40	2.31710969513663	active	Indo-Oceanic
fadD7 40	2.29116427812063	active	Indo-Oceanic
fadD7 40	2.79236503716806	active	Indo-Oceanic
fadD7 40	2.37137404267211	active	Indo-Oceanic
fadD7 40	2.48697384059331	active	Indo-Oceanic
fadD7 40	0.12086533425354	barely active	East-Asian
fadD7 40	1.9408278674759	active	Euro-American
fadD7 37	0.228344122751629	barely active	East-Asian
fadD7 37	0.098761804975938	barely active	East-Asian
fadD7 37	2.59488291309398	active	East-Asian
fadD7 37	0.158059189678259	barely active	East-Asian
fadD7 37	2.07781909240399	active	East-African-Indian
fadD7 37	0.464226447632695	barely active	East-Asian
fadD7 37	2.79236503716806	active	Indo-Oceanic
fadD7 37	0.149675650338161	barely active	East-Asian
fadD7 37	2.79236503716806	active	Euro-American
fadD7 37	0.130824717248848	barely active	East-Asian
fadD7 37	2.79236503716806	active	Euro-American
fadD7 37	0.113394026201868	barely active	East-Asian
fadD7 37	2.52320296150457	active	East-African-Indian
fadD7 37	0.102034803162936	barely active	East-Asian
fadD7 37	0.0899243819334955	barely active	East-Asian
fadD7 37	2.60194707085389	active	Indo-Oceanic
fadD7 37	0.0865155803840318	barely active	East-Asian
fadD7 37	0.198655928527712	barely active	East-Asian
fadD7 37	0.0750078974582668	barely active	East-Asian
fadD7 37	0.00536890957332367	barely active	East-Asian
fadD7 37	0.314050525926589	barely active	East-Asian
fadD7 37	0	barely active	East-Asian
fadD7 37	2.27658849374543	active	East-African-Indian
fadD7 37	0	barely active	East-Asian
fadD7 37	0.339680686824271	barely active	East-Asian
fadD7 37	0.213542582319164	barely active	East-Asian
fadD7 37	0.654773701101648	barely active	East-Asian
fadD7 37	0	barely active	East-Asian
fadD7 37	0.221562720017902	barely active	East-Asian
fadD7 37	0	barely active	East-Asian
fadD7 37	0	barely active	East-Asian
fadD7 37	0	barely active	East-Asian
fadD7 37	2.45098210473747	active	Euro-American
fadD7 37	2.72041353462414	active	Euro-American
fadD7 37	2.68016156991446	active	Euro-American
fadD7 37	2.5255136269696	active	Euro-American
fadD7 37	0	barely active	East-Asian
fadD7 37	0	barely active	East-Asian
fadD7 37	2.79236503716806	active	Euro-American
fadD7 37	2.56979224043784	active	Euro-American
fadD7 37	0.0642311397956477	barely active	East-Asian
fadD7 37	2.02032567451508	active	Euro-American
fadD7 37	0	barely active	East-Asian
fadD7 37	2.40760833783528	active	Euro-American
fadD7 37	2.51358920679622	active	Euro-American
fadD7 37	0	inactive	Indo-Oceanic
fadD7 37	0.00239165125511638	inactive	Indo-Oceanic
fadD7 37	0	inactive	Indo-Oceanic
fadD7 37	2.60962033279025	active	Euro-American
fadD7 37	0.89303454899099	moderately active	Euro-American
fadD7 37	0.873622433961725	moderately active	Euro-American
fadD7 37	0.197198297866006	barely active	East-Asian
fadD7 37	2.79236503716806	active	Euro-American
fadD7 37	0.512079054490613	barely active	East-Asian
fadD7 37	2.79236503716806	active	Euro-American
fadD7 37	0.237602268282737	barely active	East-Asian
fadD7 37	2.79236503716806	active	East-African-Indian
fadD7 37	2.56092581169464	active	M. Africanum, West African 2
fadD7 37	2.79236503716806	active	Indo-Oceanic
fadD7 37	0	inactive	Indo-Oceanic
fadD7 37	2.79236503716806	active	M. Africanum, West African 1
fadD7 37	2.28141860626522	active	M. Africanum, West African 1
fadD7 37	2.74407570431389	active	Euro-American
fadD7 37	2.50540534052854	active	Euro-American
fadD7 37	0.363895026116017	barely active	East-Asian
fadD7 37	2.11498145550443	active	East-African-Indian
fadD7 37	0.530500246683412	moderately active	Euro-American
fadD7 37	2.43645916812457	active	Euro-American
fadD7 37	2.46274827109744	active	Euro-American
fadD7 37	2.79236503716806	active	Euro-American
fadD7 37	2.57397430508566	active	Euro-American
fadD7 37	2.72041739217967	active	Euro-American
fadD7 37	2.51172590947342	active	Euro-American
fadD7 37	2.79236503716806	active	Lineage 7
fadD7 37	2.5739867423844	active	Indo-Oceanic
fadD7 37	2.79236503716806	active	Indo-Oceanic
fadD7 37	0.20507778418923	barely active	East-Asian
fadD7 37	2.71467530924533	active	Indo-Oceanic
fadD7 37	2.33471443556954	active	East-Asian
fadD7 37	2.44975196395482	active	Indo-Oceanic
fadD7 37	2.79236503716806	active	Indo-Oceanic
fadD7 37	2.70216375412326	active	Indo-Oceanic
fadD7 37	2.43071867223853	active	Indo-Oceanic
fadD7 37	2.79236503716806	active	Indo-Oceanic
fadD7 37	2.65068670062886	active	Indo-Oceanic
fadD7 37	0	barely active	East-Asian
fadD7 37	2.45036987412766	active	Euro-American
cyp138 36	1.17728709992054	barely active	East-Asian
cyp138 36	1.2964075639767	barely active	East-Asian
cyp138 36	2.79236503716806	active	East-Asian
cyp138 36	1.30294955692874	barely active	East-Asian
cyp138 36	2.79236503716806	active	East-African-Indian
cyp138 36	0.863618766034704	barely active	East-Asian
cyp138 36	0.69520800623078	barely active	East-Asian
cyp138 36	2.79236503716806	active	Euro-American
cyp138 36	0.193647673481777	barely active	East-Asian
cyp138 36	2.79236503716806	active	Euro-American
cyp138 36	0.502337329329567	barely active	East-Asian
cyp138 36	2.79236503716806	active	East-African-Indian
cyp138 36	0.309823367365873	barely active	East-Asian
cyp138 36	0.739529016494889	barely active	East-Asian
cyp138 36	2.79236503716806	active	Indo-Oceanic
cyp138 36	0.675237549137182	barely active	East-Asian
cyp138 36	1.08809755338001	barely active	East-Asian
cyp138 36	0	barely active	East-Asian
cyp138 36	0.768886028571694	barely active	East-Asian
cyp138 36	0.80754398063752	barely active	East-Asian
cyp138 36	0.295402474652782	barely active	East-Asian
cyp138 36	2.79236503716806	active	East-African-Indian
cyp138 36	0.696893410458648	barely active	East-Asian
cyp138 36	0.203022008983469	barely active	East-Asian
cyp138 36	0.712539108033484	barely active	East-Asian
cyp138 36	0.8977406536435	barely active	East-Asian
cyp138 36	0.321945532637586	barely active	East-Asian
cyp138 36	0.183017676356136	barely active	East-Asian
cyp138 36	0.477881591589307	barely active	East-Asian
cyp138 36	0.228694091275741	barely active	East-Asian
cyp138 36	2.79236503716806	active	Euro-American
cyp138 36	0.262529957559071	barely active	East-Asian
cyp138 36	2.79236503716806	active	Euro-American
cyp138 36	2.79236503716806	active	Euro-American
cyp138 36	2.79236503716806	active	Euro-American
cyp138 36	2.70690192606937	active	Euro-American
cyp138 36	2.70859697742338	active	Euro-American
cyp138 36	0.479875389359646	barely active	East-Asian
cyp138 36	0.65801478938097	barely active	East-Asian
cyp138 36	2.79236503716806	active	Euro-American
cyp138 36	2.79236503716806	active	Euro-American
cyp138 36	0.600331373326791	barely active	East-Asian
cyp138 36	2.17021378700367	active	Euro-American
cyp138 36	0.465853702565965	barely active	East-Asian
cyp138 36	2.79236503716806	active	Euro-American
cyp138 36	2.79236503716806	active	Euro-American
cyp138 36	0	inactive	Indo-Oceanic
cyp138 36	0.33564466194113	inactive	Indo-Oceanic
cyp138 36	0.215303507274674	inactive	Indo-Oceanic
cyp138 36	2.6763460629584	moderately active	Euro-American
cyp138 36	2.79236503716806	active	Euro-American
cyp138 36	2.18997813837854	moderately active	Euro-American
cyp138 36	2.36171970936393	moderately active	Euro-American
cyp138 36	0.807650773341212	barely active	East-Asian
cyp138 36	2.5600165575143	active	Euro-American
cyp138 36	1.093626890799	barely active	East-Asian
cyp138 36	2.30381951917274	active	Euro-American
cyp138 36	1.33182112914517	barely active	East-Asian
cyp138 36	2.79236503716806	active	East-African-Indian
cyp138 36	2.79236503716806	active	M. Africanum, West African 2
cyp138 36	2.79236503716806	active	Indo-Oceanic
cyp138 36	0.0148859871922549	inactive	Indo-Oceanic
cyp138 36	2.79236503716806	active	M. Africanum, West African 1
cyp138 36	2.79236503716806	active	M. Africanum, West African 1
cyp138 36	2.79236503716806	active	Euro-American
cyp138 36	2.79236503716806	active	Euro-American
cyp138 36	1.18127656543288	barely active	East-Asian
cyp138 36	2.79236503716806	active	Euro-American
cyp138 36	2.79236503716806	active	East-African-Indian
cyp138 36	1.55135394898249	moderately active	Euro-American
cyp138 36	2.79236503716806	active	Indo-Oceanic
cyp138 36	2.79236503716806	active	Euro-American
cyp138 36	2.79236503716806	active	Euro-American
cyp138 36	2.79236503716806	active	Euro-American
cyp138 36	2.79236503716806	active	Euro-American
cyp138 36	2.79236503716806	active	Euro-American
cyp138 36	2.79236503716806	active	Euro-American
cyp138 36	2.79236503716806	active	Lineage 7
cyp138 36	2.79236503716806	active	Indo-Oceanic
cyp138 36	2.79236503716806	active	Indo-Oceanic
cyp138 36	2.79236503716806	active	Indo-Oceanic
cyp138 36	0.448436826702483	barely active	East-Asian
cyp138 36	2.79236503716806	active	Indo-Oceanic
cyp138 36	2.79236503716806	active	East-Asian
cyp138 36	2.79236503716806	active	Indo-Oceanic
cyp138 36	2.79236503716806	active	Indo-Oceanic
cyp138 36	2.79018150349636	active	Indo-Oceanic
cyp138 36	2.79236503716806	active	Indo-Oceanic
cyp138 36	2.79236503716806	active	Indo-Oceanic
cyp138 36	2.71886894462826	active	Indo-Oceanic
cyp138 36	0.521036523580016	barely active	East-Asian
cyp138 36	2.79236503716806	active	Euro-American
cyp138 33	0.511138903635205	barely active	East-Asian
cyp138 33	1.53246314851982	barely active	East-Asian
cyp138 33	2.51163449714273	active	East-Asian
cyp138 33	0.241032232146279	barely active	East-Asian
cyp138 33	2.72518725007541	active	East-African-Indian
cyp138 33	0.553649383891608	barely active	East-Asian
cyp138 33	0.760917475858166	barely active	East-Asian
cyp138 33	2.79236503716806	active	Euro-American
cyp138 33	0.340278082877798	barely active	East-Asian
cyp138 33	2.79236503716806	active	Euro-American
cyp138 33	0.424392560930971	barely active	East-Asian
cyp138 33	2.79236503716806	active	East-African-Indian
cyp138 33	0.606266031771235	barely active	East-Asian
cyp138 33	0.497812227438978	barely active	East-Asian
cyp138 33	2.44916749997304	active	Indo-Oceanic
cyp138 33	0.467630955358302	barely active	East-Asian
cyp138 33	0.544042996239063	barely active	East-Asian
cyp138 33	0.0367690931705751	barely active	East-Asian
cyp138 33	0.32292803495857	barely active	East-Asian
cyp138 33	0.194772820992359	barely active	East-Asian
cyp138 33	0.452198579286731	barely active	East-Asian
cyp138 33	2.44313805060854	active	East-African-Indian
cyp138 33	0.191871426218421	barely active	East-Asian
cyp138 33	0.00715006097726957	barely active	East-Asian
cyp138 33	0.613629740132036	barely active	East-Asian
cyp138 33	0.414300098068637	barely active	East-Asian
cyp138 33	0	barely active	East-Asian
cyp138 33	0.608122872045178	barely active	East-Asian
cyp138 33	0	barely active	East-Asian
cyp138 33	0.496135598632316	barely active	East-Asian
cyp138 33	2.79236503716806	active	Euro-American
cyp138 33	0.511830252359035	barely active	East-Asian
cyp138 33	2.6283219324959	active	Euro-American
cyp138 33	2.66159793672547	active	Euro-American
cyp138 33	2.79236503716806	active	Euro-American
cyp138 33	2.48505571116843	active	Euro-American
cyp138 33	2.46231200648834	active	Euro-American
cyp138 33	0.160784453775813	barely active	East-Asian
cyp138 33	0.242672699149683	barely active	East-Asian
cyp138 33	2.75958165156842	active	Euro-American
cyp138 33	2.74149279627651	active	Euro-American
cyp138 33	0.666024894485701	barely active	East-Asian
cyp138 33	2.43034897474452	active	Euro-American
cyp138 33	0	barely active	East-Asian
cyp138 33	2.33668655190466	active	Euro-American
cyp138 33	2.79236503716806	active	Euro-American
cyp138 33	0.255901169513713	inactive	Indo-Oceanic
cyp138 33	0	inactive	Indo-Oceanic
cyp138 33	0.140341449593451	inactive	Indo-Oceanic
cyp138 33	2.40993770845653	moderately active	Euro-American
cyp138 33	2.63661441208483	active	Euro-American
cyp138 33	1.52718001732624	moderately active	Euro-American
cyp138 33	2.10485951187616	moderately active	Euro-American
cyp138 33	0.223951025471691	barely active	East-Asian
cyp138 33	2.79236503716806	active	Euro-American
cyp138 33	0.659778345346436	barely active	East-Asian
cyp138 33	2.65646955388444	active	Euro-American
cyp138 33	0.865993651429115	barely active	East-Asian
cyp138 33	2.24712792269322	active	East-African-Indian
cyp138 33	2.79236503716806	active	M. Africanum, West African 2
cyp138 33	2.71492374342761	active	Indo-Oceanic
cyp138 33	0.215547026315004	inactive	Indo-Oceanic
cyp138 33	2.69027886519042	active	M. Africanum, West African 1
cyp138 33	2.78602641903115	active	M. Africanum, West African 1
cyp138 33	2.79236503716806	active	Euro-American
cyp138 33	2.79236503716806	active	Euro-American
cyp138 33	0.472188975714389	barely active	East-Asian
cyp138 33	2.14250616253067	active	Euro-American
cyp138 33	2.79236503716806	active	East-African-Indian
cyp138 33	1.15587701585048	moderately active	Euro-American
cyp138 33	2.71582786395428	active	Indo-Oceanic
cyp138 33	2.35092866693097	active	Euro-American
cyp138 33	2.6447501073179	active	Euro-American
cyp138 33	2.79236503716806	active	Euro-American
cyp138 33	2.79236503716806	active	Euro-American
cyp138 33	2.79236503716806	active	Euro-American
cyp138 33	2.79236503716806	active	Euro-American
cyp138 33	2.79236503716806	active	Lineage 7
cyp138 33	2.64709485802786	active	Indo-Oceanic
cyp138 33	2.79236503716806	active	Indo-Oceanic
cyp138 33	2.66800229848931	active	Indo-Oceanic
cyp138 33	0.221551424341654	barely active	East-Asian
cyp138 33	2.67374668537615	active	Indo-Oceanic
cyp138 33	2.79236503716806	active	East-Asian
cyp138 33	2.47914121255794	active	Indo-Oceanic
cyp138 33	2.56414579272372	active	Indo-Oceanic
cyp138 33	2.74073248783496	active	Indo-Oceanic
cyp138 33	2.79236503716806	active	Indo-Oceanic
cyp138 33	2.74852241784624	active	Indo-Oceanic
cyp138 33	2.71686967486986	active	Indo-Oceanic
cyp138 33	0.580907979557414	barely active	East-Asian
cyp138 33	2.44902269404948	active	Euro-American
Rv0138 7	0.232149034955059	barely active	East-Asian
Rv0138 7	0.883863920186414	barely active	East-Asian
Rv0138 7	2.79236503716806	active	East-Asian
Rv0138 7	0.909145892089118	barely active	East-Asian
Rv0138 7	2.52056728464093	active	East-African-Indian
Rv0138 7	0.989430519343219	barely active	East-Asian
Rv0138 7	2.79236503716806	active	Indo-Oceanic
Rv0138 7	0.495798250238316	barely active	East-Asian
Rv0138 7	2.72392319536064	active	Euro-American
Rv0138 7	0.31765177860158	barely active	East-Asian
Rv0138 7	2.64773234930678	active	Euro-American
Rv0138 7	0.853079121721666	barely active	East-Asian
Rv0138 7	2.79236503716806	active	East-African-Indian
Rv0138 7	0.372189248326247	barely active	East-Asian
Rv0138 7	0.709781673100837	barely active	East-Asian
Rv0138 7	2.79236503716806	active	Indo-Oceanic
Rv0138 7	0.210869616786442	barely active	East-Asian
Rv0138 7	1.12174794282193	barely active	East-Asian
Rv0138 7	0.782353140443952	barely active	East-Asian
Rv0138 7	0.755980044374757	barely active	East-Asian
Rv0138 7	0.630057839422233	barely active	East-Asian
Rv0138 7	0.881164917196977	barely active	East-Asian
Rv0138 7	2.79236503716806	active	East-African-Indian
Rv0138 7	0.755220113833514	barely active	East-Asian
Rv0138 7	1.14962031254287	barely active	East-Asian
Rv0138 7	1.01450917641422	barely active	East-Asian
Rv0138 7	0.800982633570153	barely active	East-Asian
Rv0138 7	0.309832152985485	barely active	East-Asian
Rv0138 7	0.732984755721088	barely active	East-Asian
Rv0138 7	0.405731805833472	barely active	East-Asian
Rv0138 7	0.156285595747691	barely active	East-Asian
Rv0138 7	2.79236503716806	active	Euro-American
Rv0138 7	1.08770377921844	barely active	East-Asian
Rv0138 7	2.68885685809647	active	Euro-American
Rv0138 7	2.79236503716806	active	Euro-American
Rv0138 7	2.79236503716806	active	Euro-American
Rv0138 7	2.72945127064062	active	Euro-American
Rv0138 7	2.79236503716806	active	Euro-American
Rv0138 7	0.550805558884703	barely active	East-Asian
Rv0138 7	0.797261550827321	barely active	East-Asian
Rv0138 7	2.48804102845424	active	Euro-American
Rv0138 7	2.61122919887819	active	Euro-American
Rv0138 7	0.373197918999105	barely active	East-Asian
Rv0138 7	2.57468573047859	active	Euro-American
Rv0138 7	0.526148004716592	barely active	East-Asian
Rv0138 7	2.38555473074473	active	Euro-American
Rv0138 7	2.79236503716806	active	Euro-American
Rv0138 7	0.111184777332797	inactive	Indo-Oceanic
Rv0138 7	0.425472871320358	inactive	Indo-Oceanic
Rv0138 7	0	inactive	Indo-Oceanic
Rv0138 7	2.31983197915366	moderately active	Euro-American
Rv0138 7	2.79236503716806	active	Euro-American
Rv0138 7	2.60259353640327	moderately active	Euro-American
Rv0138 7	2.20000231342017	moderately active	Euro-American
Rv0138 7	0	barely active	East-Asian
Rv0138 7	2.69344844799834	active	Euro-American
Rv0138 7	1.07227365006283	barely active	East-Asian
Rv0138 7	2.79236503716806	active	Euro-American
Rv0138 7	1.07576816547799	barely active	East-Asian
Rv0138 7	2.71486023489069	active	East-African-Indian
Rv0138 7	2.68999071766468	active	M. Africanum, West African 2
Rv0138 7	2.79236503716806	active	Indo-Oceanic
Rv0138 7	0.215547026315004	inactive	Indo-Oceanic
Rv0138 7	2.79047729700332	active	M. Africanum, West African 1
Rv0138 7	2.79236503716806	active	M. Africanum, West African 1
Rv0138 7	2.71034996751285	active	Euro-American
Rv0138 7	2.51301298724817	active	Euro-American
Rv0138 7	0.383078582677191	barely active	East-Asian
Rv0138 7	2.79236503716806	active	Euro-American
Rv0138 7	2.32180176338942	active	East-African-Indian
Rv0138 7	1.02599192007643	moderately active	Euro-American
Rv0138 7	2.79236503716806	active	Indo-Oceanic
Rv0138 7	2.79236503716806	active	Euro-American
Rv0138 7	2.64808031993799	active	Euro-American
Rv0138 7	2.77423773240791	active	Euro-American
Rv0138 7	2.79236503716806	active	Euro-American
Rv0138 7	2.79236503716806	active	Euro-American
Rv0138 7	2.79236503716806	active	Euro-American
Rv0138 7	2.79236503716806	active	Lineage 7
Rv0138 7	2.79236503716806	active	Indo-Oceanic
Rv0138 7	2.699268323914	active	Indo-Oceanic
Rv0138 7	2.68911966926983	active	Indo-Oceanic
Rv0138 7	1.1728590481389	barely active	East-Asian
Rv0138 7	2.79236503716806	active	Indo-Oceanic
Rv0138 7	2.79236503716806	active	East-Asian
Rv0138 7	2.79236503716806	active	Indo-Oceanic
Rv0138 7	2.79236503716806	active	Indo-Oceanic
Rv0138 7	2.79236503716806	active	Indo-Oceanic
Rv0138 7	2.79236503716806	active	Indo-Oceanic
Rv0138 7	2.53895403686737	active	Indo-Oceanic
Rv0138 7	2.56288927079712	active	Indo-Oceanic
Rv0138 7	0.335361000452462	barely active	East-Asian
Rv0138 7	2.40384494777146	active	Euro-American
Rv0138 4	0.781635392233363	barely active	East-Asian
Rv0138 4	0.84770004080822	barely active	East-Asian
Rv0138 4	2.79236503716806	active	East-Asian
Rv0138 4	1.04395000042972	barely active	East-Asian
Rv0138 4	2.79236503716806	active	East-African-Indian
Rv0138 4	0.577478999938117	barely active	East-Asian
Rv0138 4	2.79236503716806	active	Indo-Oceanic
Rv0138 4	0.0466312678889599	barely active	East-Asian
Rv0138 4	2.79236503716806	active	Euro-American
Rv0138 4	0.542785012998683	barely active	East-Asian
Rv0138 4	2.79236503716806	active	Euro-American
Rv0138 4	0.0983444393285736	barely active	East-Asian
Rv0138 4	2.79236503716806	active	East-African-Indian
Rv0138 4	0.357689678631132	barely active	East-Asian
Rv0138 4	0.618556913054299	barely active	East-Asian
Rv0138 4	2.79236503716806	active	Indo-Oceanic
Rv0138 4	0.212164094254078	barely active	East-Asian
Rv0138 4	1.09376074040031	barely active	East-Asian
Rv0138 4	0.516649547834174	barely active	East-Asian
Rv0138 4	0.24984833671628	barely active	East-Asian
Rv0138 4	0.682489943721079	barely active	East-Asian
Rv0138 4	0.665952082349306	barely active	East-Asian
Rv0138 4	2.79236503716806	active	East-African-Indian
Rv0138 4	0	barely active	East-Asian
Rv0138 4	0.447802662070777	barely active	East-Asian
Rv0138 4	1.15343477523335	barely active	East-Asian
Rv0138 4	0.841157125277133	barely active	East-Asian
Rv0138 4	0.460983488695995	barely active	East-Asian
Rv0138 4	0.394399316880117	barely active	East-Asian
Rv0138 4	0.229528357872858	barely active	East-Asian
Rv0138 4	0	barely active	East-Asian
Rv0138 4	2.79236503716806	active	Euro-American
Rv0138 4	0	barely active	East-Asian
Rv0138 4	2.54736478345629	active	Euro-American
Rv0138 4	2.79236503716806	active	Euro-American
Rv0138 4	2.79236503716806	active	Euro-American
Rv0138 4	2.79236503716806	active	Euro-American
Rv0138 4	2.79236503716806	active	Euro-American
Rv0138 4	0.621503848130936	barely active	East-Asian
Rv0138 4	0.2255121479915	barely active	East-Asian
Rv0138 4	2.66003003584313	active	Euro-American
Rv0138 4	2.79236503716806	active	Euro-American
Rv0138 4	0.119441326753322	barely active	East-Asian
Rv0138 4	2.49020228093197	active	Euro-American
Rv0138 4	0	barely active	East-Asian
Rv0138 4	2.79236503716806	active	Euro-American
Rv0138 4	2.79236503716806	active	Euro-American
Rv0138 4	0	inactive	Indo-Oceanic
Rv0138 4	0.344156161796648	inactive	Indo-Oceanic
Rv0138 4	0.55434808420472	inactive	Indo-Oceanic
Rv0138 4	2.03524613476965	moderately active	Euro-American
Rv0138 4	2.79236503716806	active	Euro-American
Rv0138 4	1.77738645080512	moderately active	Euro-American
Rv0138 4	2.26851569271279	moderately active	Euro-American
Rv0138 4	0.456584926684655	barely active	East-Asian
Rv0138 4	2.79236503716806	active	Euro-American
Rv0138 4	0.530379871233556	barely active	East-Asian
Rv0138 4	2.79236503716806	active	Euro-American
Rv0138 4	0.937853558938302	barely active	East-Asian
Rv0138 4	2.79236503716806	active	East-African-Indian
Rv0138 4	2.79236503716806	active	M. Africanum, West African 2
Rv0138 4	2.79236503716806	active	Indo-Oceanic
Rv0138 4	0.0858077731228724	inactive	Indo-Oceanic
Rv0138 4	2.79236503716806	active	M. Africanum, West African 1
Rv0138 4	2.79236503716806	active	M. Africanum, West African 1
Rv0138 4	2.79236503716806	active	Euro-American
Rv0138 4	2.79236503716806	active	Euro-American
Rv0138 4	0.219445327102603	barely active	East-Asian
Rv0138 4	2.79236503716806	active	Euro-American
Rv0138 4	2.79236503716806	active	East-African-Indian
Rv0138 4	0.538674178129112	moderately active	Euro-American
Rv0138 4	2.79236503716806	active	Indo-Oceanic
Rv0138 4	2.79236503716806	active	Euro-American
Rv0138 4	2.78186388319688	active	Euro-American
Rv0138 4	2.79236503716806	active	Euro-American
Rv0138 4	2.79236503716806	active	Euro-American
Rv0138 4	2.79236503716806	active	Euro-American
Rv0138 4	2.79236503716806	active	Euro-American
Rv0138 4	2.79236503716806	active	Lineage 7
Rv0138 4	2.79236503716806	active	Indo-Oceanic
Rv0138 4	2.79236503716806	active	Indo-Oceanic
Rv0138 4	2.79236503716806	active	Indo-Oceanic
Rv0138 4	0.229091659489579	barely active	East-Asian
Rv0138 4	2.79236503716806	active	Indo-Oceanic
Rv0138 4	2.79236503716806	active	East-Asian
Rv0138 4	2.79236503716806	active	Indo-Oceanic
Rv0138 4	2.79236503716806	active	Indo-Oceanic
Rv0138 4	2.79236503716806	active	Indo-Oceanic
Rv0138 4	2.79236503716806	active	Indo-Oceanic
Rv0138 4	2.79236503716806	active	Indo-Oceanic
Rv0138 4	2.79236503716806	active	Indo-Oceanic
Rv0138 4	0	barely active	East-Asian
Rv0138 4	2.79236503716806	active	Euro-American
Rv0142 8	1.45091795811421	barely active	East-Asian
Rv0142 8	1.84172613976359	barely active	East-Asian
Rv0142 8	2.77099872632406	active	East-Asian
Rv0142 8	1.47788346349884	barely active	East-Asian
Rv0142 8	2.79236503716806	active	East-African-Indian
Rv0142 8	0.514469202412317	barely active	East-Asian
Rv0142 8	2.79236503716806	active	Indo-Oceanic
Rv0142 8	1.02871826099356	barely active	East-Asian
Rv0142 8	2.79236503716806	active	Euro-American
Rv0142 8	0.686343440077523	barely active	East-Asian
Rv0142 8	2.79236503716806	active	Euro-American
Rv0142 8	0.515786717182124	barely active	East-Asian
Rv0142 8	2.79236503716806	active	East-African-Indian
Rv0142 8	0.838464975151577	barely active	East-Asian
Rv0142 8	1.08243338306428	barely active	East-Asian
Rv0142 8	2.79236503716806	active	Indo-Oceanic
Rv0142 8	0.316952042860634	barely active	East-Asian
Rv0142 8	0.594847366910554	barely active	East-Asian
Rv0142 8	1.11649628564131	barely active	East-Asian
Rv0142 8	0.878420980876286	barely active	East-Asian
Rv0142 8	0.311586485975108	barely active	East-Asian
Rv0142 8	0.104471014967313	barely active	East-Asian
Rv0142 8	2.79236503716806	active	East-African-Indian
Rv0142 8	0.499787430733059	barely active	East-Asian
Rv0142 8	0.701848284677317	barely active	East-Asian
Rv0142 8	1.42901303594557	barely active	East-Asian
Rv0142 8	0.309876596051107	barely active	East-Asian
Rv0142 8	0.711733322912061	barely active	East-Asian
Rv0142 8	0.512737606216197	barely active	East-Asian
Rv0142 8	0.0594348074449118	barely active	East-Asian
Rv0142 8	0.588459007340565	barely active	East-Asian
Rv0142 8	2.79236503716806	active	Euro-American
Rv0142 8	0.696087544808712	barely active	East-Asian
Rv0142 8	2.6498944483562	active	Euro-American
Rv0142 8	2.79236503716806	active	Euro-American
Rv0142 8	2.79236503716806	active	Euro-American
Rv0142 8	2.79236503716806	active	Euro-American
Rv0142 8	2.79236503716806	active	Euro-American
Rv0142 8	0.0178855481294554	barely active	East-Asian
Rv0142 8	1.16056887457985	barely active	East-Asian
Rv0142 8	2.79236503716806	active	Euro-American
Rv0142 8	2.79236503716806	active	Euro-American
Rv0142 8	2.79236503716806	active	Euro-American
Rv0142 8	0.173867923036042	barely active	East-Asian
Rv0142 8	2.79236503716806	active	Euro-American
Rv0142 8	2.3321674823939	active	Euro-American
Rv0142 8	0	inactive	Indo-Oceanic
Rv0142 8	0	inactive	Indo-Oceanic
Rv0142 8	0.229581307523281	inactive	Indo-Oceanic
Rv0142 8	2.17684870398858	moderately active	Euro-American
Rv0142 8	2.79236503716806	active	Euro-American
Rv0142 8	2.54294733318456	moderately active	Euro-American
Rv0142 8	2.42990431167552	moderately active	Euro-American
Rv0142 8	0.182984438646305	barely active	East-Asian
Rv0142 8	2.65136784442794	active	Euro-American
Rv0142 8	1.05762687409843	barely active	East-Asian
Rv0142 8	2.79236503716806	active	Euro-American
Rv0142 8	0.572696844990873	barely active	East-Asian
Rv0142 8	2.79236503716806	active	East-African-Indian
Rv0142 8	2.79236503716806	active	M. Africanum, West African 2
Rv0142 8	2.79236503716806	active	Indo-Oceanic
Rv0142 8	0	inactive	Indo-Oceanic
Rv0142 8	2.79236503716806	active	M. Africanum, West African 1
Rv0142 8	2.79236503716806	active	M. Africanum, West African 1
Rv0142 8	2.79236503716806	active	Euro-American
Rv0142 8	2.79236503716806	active	Euro-American
Rv0142 8	0.595346786739932	barely active	East-Asian
Rv0142 8	2.79236503716806	active	Euro-American
Rv0142 8	2.79236503716806	active	East-African-Indian
Rv0142 8	1.0032833800145	moderately active	Euro-American
Rv0142 8	2.79236503716806	active	Indo-Oceanic
Rv0142 8	2.79236503716806	active	Euro-American
Rv0142 8	2.79236503716806	active	Euro-American
Rv0142 8	2.79236503716806	active	Euro-American
Rv0142 8	2.79236503716806	active	Euro-American
Rv0142 8	2.79236503716806	active	Euro-American
Rv0142 8	2.79236503716806	active	Lineage 7
Rv0142 8	2.79236503716806	active	Indo-Oceanic
Rv0142 8	2.74580731770204	active	Indo-Oceanic
Rv0142 8	2.79236503716806	active	Indo-Oceanic
Rv0142 8	0.580055794200561	barely active	East-Asian
Rv0142 8	2.79236503716806	active	Indo-Oceanic
Rv0142 8	2.79236503716806	active	East-Asian
Rv0142 8	2.79236503716806	active	Indo-Oceanic
Rv0142 8	2.79236503716806	active	Indo-Oceanic
Rv0142 8	2.79236503716806	active	Indo-Oceanic
Rv0142 8	2.77509952780156	active	Indo-Oceanic
Rv0142 8	2.79236503716806	active	Indo-Oceanic
Rv0142 8	2.79236503716806	active	Indo-Oceanic
Rv0142 8	0.414278057676683	barely active	East-Asian
Rv0142 8	2.34480059347407	active	Euro-American
Rv0142 5	1.36803957893528	barely active	East-Asian
Rv0142 5	1.42925191336672	barely active	East-Asian
Rv0142 5	2.68439362281292	active	East-Asian
Rv0142 5	1.0804581004084	barely active	East-Asian
Rv0142 5	2.35457721685699	active	East-African-Indian
Rv0142 5	0.925475698675047	barely active	East-Asian
Rv0142 5	2.59891271209954	active	Indo-Oceanic
Rv0142 5	1.55806783597499	barely active	East-Asian
Rv0142 5	2.79236503716806	active	Euro-American
Rv0142 5	0.292223847287552	barely active	East-Asian
Rv0142 5	2.79236503716806	active	Euro-American
Rv0142 5	0	barely active	East-Asian
Rv0142 5	2.28422865913321	active	East-African-Indian
Rv0142 5	0.234907660587962	barely active	East-Asian
Rv0142 5	0.321602080959012	barely active	East-Asian
Rv0142 5	2.40380219576412	active	Indo-Oceanic
Rv0142 5	0.345544787973797	barely active	East-Asian
Rv0142 5	0.886711922212971	barely active	East-Asian
Rv0142 5	0	barely active	East-Asian
Rv0142 5	0.253788334725109	barely active	East-Asian
Rv0142 5	0.312819032005557	barely active	East-Asian
Rv0142 5	0	barely active	East-Asian
Rv0142 5	2.74044364060415	active	East-African-Indian
Rv0142 5	0.40233909061724	barely active	East-Asian
Rv0142 5	0.910489093235567	barely active	East-Asian
Rv0142 5	0.758287982963918	barely active	East-Asian
Rv0142 5	0.486562841469448	barely active	East-Asian
Rv0142 5	0	barely active	East-Asian
Rv0142 5	0	barely active	East-Asian
Rv0142 5	0.0256680629670015	barely active	East-Asian
Rv0142 5	0	barely active	East-Asian
Rv0142 5	2.41151893426279	active	Euro-American
Rv0142 5	0	barely active	East-Asian
Rv0142 5	2.63218069786126	active	Euro-American
Rv0142 5	2.32938407568937	active	Euro-American
Rv0142 5	2.65006514516833	active	Euro-American
Rv0142 5	2.79236503716806	active	Euro-American
Rv0142 5	2.79236503716806	active	Euro-American
Rv0142 5	0	barely active	East-Asian
Rv0142 5	0.75602686469028	barely active	East-Asian
Rv0142 5	2.55823790719697	active	Euro-American
Rv0142 5	2.64295440188746	active	Euro-American
Rv0142 5	2.59324961607394	active	Euro-American
Rv0142 5	0.0305037478648646	barely active	East-Asian
Rv0142 5	2.79236503716806	active	Euro-American
Rv0142 5	2.49504040472028	active	Euro-American
Rv0142 5	0	inactive	Indo-Oceanic
Rv0142 5	0	inactive	Indo-Oceanic
Rv0142 5	0	inactive	Indo-Oceanic
Rv0142 5	2.18320936071878	moderately active	Euro-American
Rv0142 5	2.35309134348724	active	Euro-American
Rv0142 5	1.9855543291805	moderately active	Euro-American
Rv0142 5	2.38704067011925	moderately active	Euro-American
Rv0142 5	0.588903293314226	barely active	East-Asian
Rv0142 5	2.70874463509486	active	Euro-American
Rv0142 5	1.0364415442078	barely active	East-Asian
Rv0142 5	2.79236503716806	active	Euro-American
Rv0142 5	0.619501384709819	barely active	East-Asian
Rv0142 5	2.72054962055361	active	East-African-Indian
Rv0142 5	2.65667166375151	active	M. Africanum, West African 2
Rv0142 5	2.68954987331772	active	Indo-Oceanic
Rv0142 5	0	inactive	Indo-Oceanic
Rv0142 5	2.79236503716806	active	M. Africanum, West African 1
Rv0142 5	2.72877181768228	active	M. Africanum, West African 1
Rv0142 5	2.79236503716806	active	Euro-American
Rv0142 5	2.36403015104074	active	Euro-American
Rv0142 5	0.420696995703317	barely active	East-Asian
Rv0142 5	2.514383263593	active	Euro-American
Rv0142 5	2.71544769392644	active	East-African-Indian
Rv0142 5	0.979461248819865	moderately active	Euro-American
Rv0142 5	2.75469637699797	active	Indo-Oceanic
Rv0142 5	2.76315579062543	active	Euro-American
Rv0142 5	2.4090660867001	active	Euro-American
Rv0142 5	2.48617679180814	active	Euro-American
Rv0142 5	2.79236503716806	active	Euro-American
Rv0142 5	2.79236503716806	active	Euro-American
Rv0142 5	2.79236503716806	active	Lineage 7
Rv0142 5	2.55603167830363	active	Indo-Oceanic
Rv0142 5	2.79236503716806	active	Indo-Oceanic
Rv0142 5	2.71278725553741	active	Indo-Oceanic
Rv0142 5	0	barely active	East-Asian
Rv0142 5	2.79236503716806	active	Indo-Oceanic
Rv0142 5	2.44983789952951	active	East-Asian
Rv0142 5	2.79236503716806	active	Indo-Oceanic
Rv0142 5	2.66094024392306	active	Indo-Oceanic
Rv0142 5	2.79236503716806	active	Indo-Oceanic
Rv0142 5	2.64465679345022	active	Indo-Oceanic
Rv0142 5	2.59107273023616	active	Indo-Oceanic
Rv0142 5	2.74002385612226	active	Indo-Oceanic
Rv0142 5	0	barely active	East-Asian
Rv0142 5	2.66794515049444	active	Euro-American
Rv0149 2	0.662619943504488	barely active	East-Asian
Rv0149 2	1.14800532399579	barely active	East-Asian
Rv0149 2	2.79236503716806	active	East-Asian
Rv0149 2	0.034676774172977	barely active	East-Asian
Rv0149 2	2.79236503716806	active	East-African-Indian
Rv0149 2	0.283283662617863	barely active	East-Asian
Rv0149 2	2.79236503716806	active	Indo-Oceanic
Rv0149 2	0	barely active	East-Asian
Rv0149 2	2.79236503716806	active	Euro-American
Rv0149 2	0.485174289828588	barely active	East-Asian
Rv0149 2	2.79236503716806	active	Euro-American
Rv0149 2	0.192828493696273	barely active	East-Asian
Rv0149 2	2.60517332178011	active	East-African-Indian
Rv0149 2	0.185240275773273	barely active	East-Asian
Rv0149 2	0.394908335747426	barely active	East-Asian
Rv0149 2	2.79236503716806	active	Indo-Oceanic
Rv0149 2	0.221193060055203	barely active	East-Asian
Rv0149 2	0.517953767370402	barely active	East-Asian
Rv0149 2	0.355115816651002	barely active	East-Asian
Rv0149 2	0.416115572797545	barely active	East-Asian
Rv0149 2	0.38842035065376	barely active	East-Asian
Rv0149 2	0.250295533483239	barely active	East-Asian
Rv0149 2	2.79236503716806	active	East-African-Indian
Rv0149 2	0.25226602427059	barely active	East-Asian
Rv0149 2	0.435428593658884	barely active	East-Asian
Rv0149 2	0.583256091088517	barely active	East-Asian
Rv0149 2	0.860832488597674	barely active	East-Asian
Rv0149 2	0.433334213133406	barely active	East-Asian
Rv0149 2	0.550816811994138	barely active	East-Asian
Rv0149 2	0	barely active	East-Asian
Rv0149 2	0.152302081829194	barely active	East-Asian
Rv0149 2	2.79236503716806	active	Euro-American
Rv0149 2	0.266253043601788	barely active	East-Asian
Rv0149 2	2.79236503716806	active	Euro-American
Rv0149 2	2.79236503716806	active	Euro-American
Rv0149 2	2.79236503716806	active	Euro-American
Rv0149 2	2.79236503716806	active	Euro-American
Rv0149 2	2.7720295460781	active	Euro-American
Rv0149 2	0.798619227779727	barely active	East-Asian
Rv0149 2	0.120682174771073	barely active	East-Asian
Rv0149 2	2.79236503716806	active	Euro-American
Rv0149 2	2.79236503716806	active	Euro-American
Rv0149 2	2.79236503716806	active	Euro-American
Rv0149 2	0.24858317633023	barely active	East-Asian
Rv0149 2	2.79236503716806	active	Euro-American
Rv0149 2	2.79236503716806	active	Euro-American
Rv0149 2	0	inactive	Indo-Oceanic
Rv0149 2	0	inactive	Indo-Oceanic
Rv0149 2	0	inactive	Indo-Oceanic
Rv0149 2	2.79236503716806	active	Euro-American
Rv0149 2	0.657798374525293	barely active	East-Asian
Rv0149 2	2.79236503716806	active	Euro-American
Rv0149 2	0.239188452911805	barely active	East-Asian
Rv0149 2	2.79236503716806	active	Euro-American
Rv0149 2	0.281031150707959	barely active	East-Asian
Rv0149 2	2.79236503716806	active	East-African-Indian
Rv0149 2	2.79236503716806	active	M. Africanum, West African 2
Rv0149 2	2.79236503716806	active	Indo-Oceanic
Rv0149 2	0.0589411672701904	inactive	Indo-Oceanic
Rv0149 2	2.79236503716806	active	M. Africanum, West African 1
Rv0149 2	2.79236503716806	active	M. Africanum, West African 1
Rv0149 2	2.79236503716806	active	Euro-American
Rv0149 2	2.79236503716806	active	Euro-American
Rv0149 2	0.448816379918792	barely active	East-Asian
Rv0149 2	2.70715821460933	active	Euro-American
Rv0149 2	2.48507538527095	active	East-African-Indian
Rv0149 2	2.79236503716806	active	Indo-Oceanic
Rv0149 2	2.79236503716806	active	Euro-American
Rv0149 2	2.79236503716806	active	Euro-American
Rv0149 2	2.68382434070538	active	Euro-American
Rv0149 2	2.79236503716806	active	Euro-American
Rv0149 2	2.79236503716806	active	Euro-American
Rv0149 2	2.79236503716806	active	Lineage 7
Rv0149 2	2.79236503716806	active	Indo-Oceanic
Rv0149 2	2.79236503716806	active	Indo-Oceanic
Rv0149 2	2.79236503716806	active	Indo-Oceanic
Rv0149 2	0.508535846766811	barely active	East-Asian
Rv0149 2	2.79236503716806	active	Indo-Oceanic
Rv0149 2	2.79236503716806	active	East-Asian
Rv0149 2	2.79236503716806	active	Indo-Oceanic
Rv0149 2	2.79236503716806	active	Indo-Oceanic
Rv0149 2	2.79236503716806	active	Indo-Oceanic
Rv0149 2	2.79236503716806	active	Indo-Oceanic
Rv0149 2	2.79236503716806	active	Indo-Oceanic
Rv0149 2	2.79236503716806	active	Indo-Oceanic
Rv0149 2	0.46069873774175	barely active	East-Asian
Rv0149 2	2.79236503716806	active	Euro-American
PE4 5	0.135234718360147	barely active	East-Asian
PE4 5	0.695129068969344	barely active	East-Asian
PE4 5	2.79236503716806	active	East-Asian
PE4 5	0.807266278069904	barely active	East-Asian
PE4 5	2.79236503716806	active	East-African-Indian
PE4 5	0.110836466405723	barely active	East-Asian
PE4 5	2.79236503716806	active	Indo-Oceanic
PE4 5	0	barely active	East-Asian
PE4 5	2.79236503716806	active	Euro-American
PE4 5	0.43294433105603	barely active	East-Asian
PE4 5	2.79236503716806	active	Euro-American
PE4 5	0.835034946251904	barely active	East-Asian
PE4 5	2.79236503716806	active	East-African-Indian
PE4 5	0	barely active	East-Asian
PE4 5	0.83258429715802	barely active	East-Asian
PE4 5	2.79236503716806	active	Indo-Oceanic
PE4 5	1.09916471681452	barely active	East-Asian
PE4 5	0.0331586391262081	barely active	East-Asian
PE4 5	0.340700758764092	barely active	East-Asian
PE4 5	0	barely active	East-Asian
PE4 5	0.545558426206439	barely active	East-Asian
PE4 5	0.544971495037413	barely active	East-Asian
PE4 5	2.67102067466981	active	East-African-Indian
PE4 5	0.569557709037233	barely active	East-Asian
PE4 5	0.365999236669889	barely active	East-Asian
PE4 5	0.494233644220279	barely active	East-Asian
PE4 5	0.346744744790291	barely active	East-Asian
PE4 5	0.219477375779513	barely active	East-Asian
PE4 5	0.331379131247787	barely active	East-Asian
PE4 5	1.02489137651977	barely active	East-Asian
PE4 5	0.592384710554365	barely active	East-Asian
PE4 5	2.79236503716806	active	Euro-American
PE4 5	0.458588231082056	barely active	East-Asian
PE4 5	2.79236503716806	active	Euro-American
PE4 5	2.79236503716806	active	Euro-American
PE4 5	2.79236503716806	active	Euro-American
PE4 5	2.79236503716806	active	Euro-American
PE4 5	2.79236503716806	active	Euro-American
PE4 5	0.110310214040698	barely active	East-Asian
PE4 5	0.218094676429017	barely active	East-Asian
PE4 5	2.79236503716806	active	Euro-American
PE4 5	2.79236503716806	active	Euro-American
PE4 5	0.149512180641136	barely active	East-Asian
PE4 5	2.79236503716806	active	Euro-American
PE4 5	0.585978072563363	barely active	East-Asian
PE4 5	2.79236503716806	active	Euro-American
PE4 5	2.79236503716806	active	Euro-American
PE4 5	0.0438093419912666	inactive	Indo-Oceanic
PE4 5	0	inactive	Indo-Oceanic
PE4 5	0.113996454408075	inactive	Indo-Oceanic
PE4 5	1.51133715734947	moderately active	Euro-American
PE4 5	2.79236503716806	active	Euro-American
PE4 5	1.74957243866269	moderately active	Euro-American
PE4 5	2.36143585396885	moderately active	Euro-American
PE4 5	0.831870245856077	barely active	East-Asian
PE4 5	2.79236503716806	active	Euro-American
PE4 5	0.490430491185849	barely active	East-Asian
PE4 5	2.79236503716806	active	Euro-American
PE4 5	0.261890637241062	barely active	East-Asian
PE4 5	2.79236503716806	active	East-African-Indian
PE4 5	2.79236503716806	active	M. Africanum, West African 2
PE4 5	2.79236503716806	active	Indo-Oceanic
PE4 5	0	inactive	Indo-Oceanic
PE4 5	2.79236503716806	active	Euro-American
PE4 5	2.79236503716806	active	Euro-American
PE4 5	0	barely active	East-Asian
PE4 5	2.79236503716806	active	Euro-American
PE4 5	2.79236503716806	active	East-African-Indian
PE4 5	0.601474965145182	moderately active	Euro-American
PE4 5	2.79236503716806	active	Indo-Oceanic
PE4 5	2.79236503716806	active	Euro-American
PE4 5	2.79236503716806	active	Euro-American
PE4 5	2.79236503716806	active	Euro-American
PE4 5	2.79236503716806	active	Euro-American
PE4 5	2.79236503716806	active	Euro-American
PE4 5	2.79236503716806	active	Euro-American
PE4 5	2.79236503716806	active	Indo-Oceanic
PE4 5	2.79236503716806	active	Indo-Oceanic
PE4 5	2.79236503716806	active	Indo-Oceanic
PE4 5	0.244054922830566	barely active	East-Asian
PE4 5	2.79236503716806	active	East-Asian
PE4 5	2.79236503716806	active	Indo-Oceanic
PE4 5	2.79236503716806	active	Indo-Oceanic
PE4 5	2.79236503716806	active	Indo-Oceanic
PE4 5	2.79236503716806	active	Indo-Oceanic
PE4 5	2.79236503716806	active	Indo-Oceanic
PE4 5	2.79236503716806	active	Indo-Oceanic
PE4 5	0	barely active	East-Asian
PE4 5	2.79236503716806	active	Euro-American
PE4 8	0.621628823502185	barely active	East-Asian
PE4 8	1.11512794149262	barely active	East-Asian
PE4 8	2.79236503716806	active	East-Asian
PE4 8	1.63576954203386	barely active	East-Asian
PE4 8	2.79236503716806	active	East-African-Indian
PE4 8	0.712738829548591	barely active	East-Asian
PE4 8	2.79236503716806	active	Indo-Oceanic
PE4 8	0.433989453425746	barely active	East-Asian
PE4 8	2.79236503716806	active	Euro-American
PE4 8	0.907407290511636	barely active	East-Asian
PE4 8	2.79236503716806	active	Euro-American
PE4 8	0.698356526923024	barely active	East-Asian
PE4 8	2.66962441729017	active	East-African-Indian
PE4 8	0.393122189661975	barely active	East-Asian
PE4 8	0.591945182806979	barely active	East-Asian
PE4 8	2.79236503716806	active	Indo-Oceanic
PE4 8	0.568105718922174	barely active	East-Asian
PE4 8	0.943483640466888	barely active	East-Asian
PE4 8	0.515580488844248	barely active	East-Asian
PE4 8	0.820271414838605	barely active	East-Asian
PE4 8	0.681536095725414	barely active	East-Asian
PE4 8	0.237858430245016	barely active	East-Asian
PE4 8	2.79236503716806	active	East-African-Indian
PE4 8	0.357619024416818	barely active	East-Asian
PE4 8	0.52945563076137	barely active	East-Asian
PE4 8	0.838435368121293	barely active	East-Asian
PE4 8	0.923188565943324	barely active	East-Asian
PE4 8	0.349426269059693	barely active	East-Asian
PE4 8	0.709797258176615	barely active	East-Asian
PE4 8	0.766046118771476	barely active	East-Asian
PE4 8	0.241250263142834	barely active	East-Asian
PE4 8	2.79236503716806	active	Euro-American
PE4 8	0	barely active	East-Asian
PE4 8	2.79236503716806	active	Euro-American
PE4 8	2.79236503716806	active	Euro-American
PE4 8	2.79236503716806	active	Euro-American
PE4 8	2.79236503716806	active	Euro-American
PE4 8	2.79236503716806	active	Euro-American
PE4 8	0.794971450764583	barely active	East-Asian
PE4 8	0.54299433784767	barely active	East-Asian
PE4 8	2.79236503716806	active	Euro-American
PE4 8	2.79236503716806	active	Euro-American
PE4 8	0.725388852603814	barely active	East-Asian
PE4 8	2.79236503716806	active	Euro-American
PE4 8	0.303076668054256	barely active	East-Asian
PE4 8	2.79236503716806	active	Euro-American
PE4 8	2.71252202057683	active	Euro-American
PE4 8	0.604621713329342	inactive	Indo-Oceanic
PE4 8	0	inactive	Indo-Oceanic
PE4 8	0.0641697691080474	inactive	Indo-Oceanic
PE4 8	1.89626140448212	moderately active	Euro-American
PE4 8	2.79236503716806	active	Euro-American
PE4 8	1.71380130764087	moderately active	Euro-American
PE4 8	2.13173863200916	moderately active	Euro-American
PE4 8	0.52477295589451	barely active	East-Asian
PE4 8	2.79236503716806	active	Euro-American
PE4 8	1.07712304972422	barely active	East-Asian
PE4 8	2.79236503716806	active	Euro-American
PE4 8	0.717595209402351	barely active	East-Asian
PE4 8	2.79236503716806	active	East-African-Indian
PE4 8	2.79236503716806	active	M. Africanum, West African 2
PE4 8	2.79236503716806	active	Indo-Oceanic
PE4 8	0.413049667906703	inactive	Indo-Oceanic
PE4 8	2.79236503716806	active	Euro-American
PE4 8	2.79236503716806	active	Euro-American
PE4 8	0.122060522441902	barely active	East-Asian
PE4 8	2.79236503716806	active	Euro-American
PE4 8	2.79236503716806	active	East-African-Indian
PE4 8	1.04476599435147	moderately active	Euro-American
PE4 8	2.79236503716806	active	Indo-Oceanic
PE4 8	2.79236503716806	active	Euro-American
PE4 8	2.79236503716806	active	Euro-American
PE4 8	2.79236503716806	active	Euro-American
PE4 8	2.79236503716806	active	Euro-American
PE4 8	2.79236503716806	active	Euro-American
PE4 8	2.79236503716806	active	Euro-American
PE4 8	2.79236503716806	active	Indo-Oceanic
PE4 8	2.79236503716806	active	Indo-Oceanic
PE4 8	2.79236503716806	active	Indo-Oceanic
PE4 8	0.898835617154685	barely active	East-Asian
PE4 8	2.79236503716806	active	East-Asian
PE4 8	2.79236503716806	active	Indo-Oceanic
PE4 8	2.79236503716806	active	Indo-Oceanic
PE4 8	2.79236503716806	active	Indo-Oceanic
PE4 8	2.79236503716806	active	Indo-Oceanic
PE4 8	2.79236503716806	active	Indo-Oceanic
PE4 8	2.79236503716806	active	Indo-Oceanic
PE4 8	0.0785705357755267	barely active	East-Asian
PE4 8	2.79236503716806	active	Euro-American
Rv0247c 15	0.232149034955059	barely active	East-Asian
Rv0247c 15	0.781477773905999	barely active	East-Asian
Rv0247c 15	2.79236503716806	active	East-Asian
Rv0247c 15	0.0783767895772721	barely active	East-Asian
Rv0247c 15	2.79236503716806	active	East-African-Indian
Rv0247c 15	0.438433311379777	barely active	East-Asian
Rv0247c 15	2.79236503716806	active	Indo-Oceanic
Rv0247c 15	0.121557269912247	barely active	East-Asian
Rv0247c 15	2.79236503716806	active	Euro-American
Rv0247c 15	0.376449444823013	barely active	East-Asian
Rv0247c 15	2.79236503716806	active	Euro-American
Rv0247c 15	0.586127008006136	barely active	East-Asian
Rv0247c 15	2.79236503716806	active	East-African-Indian
Rv0247c 15	0.128555679415629	barely active	East-Asian
Rv0247c 15	0.03876452552215	barely active	East-Asian
Rv0247c 15	2.79236503716806	active	Indo-Oceanic
Rv0247c 15	0.186051253934946	barely active	East-Asian
Rv0247c 15	1.03094648171723	barely active	East-Asian
Rv0247c 15	0.358697188057937	barely active	East-Asian
Rv0247c 15	0.860445906545584	barely active	East-Asian
Rv0247c 15	0.376681514196993	barely active	East-Asian
Rv0247c 15	0	barely active	East-Asian
Rv0247c 15	2.79236503716806	active	East-African-Indian
Rv0247c 15	0.261238834434798	barely active	East-Asian
Rv0247c 15	0.860878645016335	barely active	East-Asian
Rv0247c 15	0.385119209632634	barely active	East-Asian
Rv0247c 15	0	barely active	East-Asian
Rv0247c 15	0.203852367010639	barely active	East-Asian
Rv0247c 15	0.548727463271411	barely active	East-Asian
Rv0247c 15	0.0548765254826075	barely active	East-Asian
Rv0247c 15	0	barely active	East-Asian
Rv0247c 15	0	barely active	East-Asian
Rv0247c 15	2.79236503716806	active	Euro-American
Rv0247c 15	2.79236503716806	active	Euro-American
Rv0247c 15	2.79236503716806	active	Euro-American
Rv0247c 15	2.79236503716806	active	Euro-American
Rv0247c 15	0.935791516298982	barely active	East-Asian
Rv0247c 15	0	barely active	East-Asian
Rv0247c 15	2.79236503716806	active	Euro-American
Rv0247c 15	2.79236503716806	active	Euro-American
Rv0247c 15	0.282892874360856	barely active	East-Asian
Rv0247c 15	2.79236503716806	active	Euro-American
Rv0247c 15	0.467975313302568	barely active	East-Asian
Rv0247c 15	2.79236503716806	active	Euro-American
Rv0247c 15	2.79236503716806	active	Euro-American
Rv0247c 15	0	inactive	Indo-Oceanic
Rv0247c 15	0	inactive	Indo-Oceanic
Rv0247c 15	0	inactive	Indo-Oceanic
Rv0247c 15	2.79236503716806	active	Euro-American
Rv0247c 15	1.5032011543918	moderately active	Euro-American
Rv0247c 15	2.19427606318238	moderately active	Euro-American
Rv0247c 15	0	barely active	East-Asian
Rv0247c 15	2.79236503716806	active	Euro-American
Rv0247c 15	0.504898900824356	barely active	East-Asian
Rv0247c 15	2.79236503716806	active	Euro-American
Rv0247c 15	0.424571966356751	barely active	East-Asian
Rv0247c 15	2.79236503716806	active	East-African-Indian
Rv0247c 15	2.79236503716806	active	M. Africanum, West African 2
Rv0247c 15	2.79236503716806	active	Indo-Oceanic
Rv0247c 15	0	inactive	Indo-Oceanic
Rv0247c 15	2.79236503716806	active	M. Africanum, West African 1
Rv0247c 15	2.79236503716806	active	M. Africanum, West African 1
Rv0247c 15	2.79236503716806	active	Euro-American
Rv0247c 15	2.79236503716806	active	Euro-American
Rv0247c 15	0.10991995956969	barely active	East-Asian
Rv0247c 15	2.79236503716806	active	East-African-Indian
Rv0247c 15	0.816742952048249	moderately active	Euro-American
Rv0247c 15	2.79236503716806	active	Euro-American
Rv0247c 15	2.79236503716806	active	Euro-American
Rv0247c 15	2.79236503716806	active	Euro-American
Rv0247c 15	2.79236503716806	active	Euro-American
Rv0247c 15	2.52927407881516	active	Euro-American
Rv0247c 15	2.79236503716806	active	Euro-American
Rv0247c 15	2.79236503716806	active	Lineage 7
Rv0247c 15	2.79236503716806	active	Indo-Oceanic
Rv0247c 15	2.79236503716806	active	Indo-Oceanic
Rv0247c 15	0.606349310442815	barely active	East-Asian
Rv0247c 15	2.79236503716806	active	Indo-Oceanic
Rv0247c 15	2.79236503716806	active	East-Asian
Rv0247c 15	2.79236503716806	active	Indo-Oceanic
Rv0247c 15	2.79236503716806	active	Indo-Oceanic
Rv0247c 15	2.79236503716806	active	Indo-Oceanic
Rv0247c 15	2.79236503716806	active	Indo-Oceanic
Rv0247c 15	2.79236503716806	active	Indo-Oceanic
Rv0247c 15	2.79236503716806	active	Indo-Oceanic
Rv0247c 15	0.478646876796403	barely active	East-Asian
Rv0247c 15	2.79236503716806	active	Euro-American
Rv0247c 18	0.486926744014338	barely active	East-Asian
Rv0247c 18	0.857037905387556	barely active	East-Asian
Rv0247c 18	2.79236503716806	active	East-Asian
Rv0247c 18	0.939275558273506	barely active	East-Asian
Rv0247c 18	2.79236503716806	active	East-African-Indian
Rv0247c 18	0.0879360642956439	barely active	East-Asian
Rv0247c 18	2.79236503716806	active	Indo-Oceanic
Rv0247c 18	0.835352015807513	barely active	East-Asian
Rv0247c 18	2.79236503716806	active	Euro-American
Rv0247c 18	0.119853599427845	barely active	East-Asian
Rv0247c 18	2.79236503716806	active	Euro-American
Rv0247c 18	0.177287642800495	barely active	East-Asian
Rv0247c 18	2.76868962123285	active	East-African-Indian
Rv0247c 18	0.388740424590095	barely active	East-Asian
Rv0247c 18	0.292384900948071	barely active	East-Asian
Rv0247c 18	2.79236503716806	active	Indo-Oceanic
Rv0247c 18	0.517696272150702	barely active	East-Asian
Rv0247c 18	0.118973528426725	barely active	East-Asian
Rv0247c 18	0.0142382598059224	barely active	East-Asian
Rv0247c 18	0.0723414633875772	barely active	East-Asian
Rv0247c 18	0.617145508455459	barely active	East-Asian
Rv0247c 18	0.332138378344435	barely active	East-Asian
Rv0247c 18	2.79236503716806	active	East-African-Indian
Rv0247c 18	0	barely active	East-Asian
Rv0247c 18	0	barely active	East-Asian
Rv0247c 18	0.56879527799298	barely active	East-Asian
Rv0247c 18	0	barely active	East-Asian
Rv0247c 18	0.0866285452116469	barely active	East-Asian
Rv0247c 18	0.0430874152116607	barely active	East-Asian
Rv0247c 18	0	barely active	East-Asian
Rv0247c 18	0.58156321730085	barely active	East-Asian
Rv0247c 18	0.0312044114526149	barely active	East-Asian
Rv0247c 18	2.79236503716806	active	Euro-American
Rv0247c 18	2.78209713961594	active	Euro-American
Rv0247c 18	2.79236503716806	active	Euro-American
Rv0247c 18	2.79236503716806	active	Euro-American
Rv0247c 18	0	barely active	East-Asian
Rv0247c 18	0.41584336009565	barely active	East-Asian
Rv0247c 18	2.79236503716806	active	Euro-American
Rv0247c 18	2.79236503716806	active	Euro-American
Rv0247c 18	0.080610067364574	barely active	East-Asian
Rv0247c 18	2.79236503716806	active	Euro-American
Rv0247c 18	0	barely active	East-Asian
Rv0247c 18	2.79236503716806	active	Euro-American
Rv0247c 18	2.79236503716806	active	Euro-American
Rv0247c 18	0	inactive	Indo-Oceanic
Rv0247c 18	0.182692739102532	inactive	Indo-Oceanic
Rv0247c 18	0.115395092463221	inactive	Indo-Oceanic
Rv0247c 18	2.79236503716806	active	Euro-American
Rv0247c 18	0.945384795683771	moderately active	Euro-American
Rv0247c 18	2.10214384982087	moderately active	Euro-American
Rv0247c 18	0	barely active	East-Asian
Rv0247c 18	2.79236503716806	active	Euro-American
Rv0247c 18	0.549448813736181	barely active	East-Asian
Rv0247c 18	2.79236503716806	active	Euro-American
Rv0247c 18	0.251011444197933	barely active	East-Asian
Rv0247c 18	2.79236503716806	active	East-African-Indian
Rv0247c 18	2.79236503716806	active	M. Africanum, West African 2
Rv0247c 18	2.79236503716806	active	Indo-Oceanic
Rv0247c 18	0.0494183931516836	inactive	Indo-Oceanic
Rv0247c 18	2.79236503716806	active	M. Africanum, West African 1
Rv0247c 18	2.79236503716806	active	M. Africanum, West African 1
Rv0247c 18	2.79236503716806	active	Euro-American
Rv0247c 18	2.79236503716806	active	Euro-American
Rv0247c 18	0.343301091389108	barely active	East-Asian
Rv0247c 18	2.79236503716806	active	East-African-Indian
Rv0247c 18	0	moderately active	Euro-American
Rv0247c 18	2.79236503716806	active	Euro-American
Rv0247c 18	2.79236503716806	active	Euro-American
Rv0247c 18	2.79236503716806	active	Euro-American
Rv0247c 18	2.79236503716806	active	Euro-American
Rv0247c 18	2.79236503716806	active	Euro-American
Rv0247c 18	2.79236503716806	active	Euro-American
Rv0247c 18	2.79236503716806	active	Lineage 7
Rv0247c 18	2.79236503716806	active	Indo-Oceanic
Rv0247c 18	2.61005123935551	active	Indo-Oceanic
Rv0247c 18	0.187124014200538	barely active	East-Asian
Rv0247c 18	2.79236503716806	active	Indo-Oceanic
Rv0247c 18	2.79236503716806	active	East-Asian
Rv0247c 18	2.79236503716806	active	Indo-Oceanic
Rv0247c 18	2.79236503716806	active	Indo-Oceanic
Rv0247c 18	2.79236503716806	active	Indo-Oceanic
Rv0247c 18	2.79236503716806	active	Indo-Oceanic
Rv0247c 18	2.79236503716806	active	Indo-Oceanic
Rv0247c 18	2.79236503716806	active	Indo-Oceanic
Rv0247c 18	0.513886869806655	barely active	East-Asian
Rv0247c 18	2.79236503716806	active	Euro-American
vapB25 49	1.05444497125373	barely active	East-Asian
vapB25 49	0.631256885802959	barely active	East-Asian
vapB25 49	2.79236503716806	active	East-Asian
vapB25 49	0.850187144974124	barely active	East-Asian
vapB25 49	2.79236503716806	active	East-African-Indian
vapB25 49	1.12777632882743	barely active	East-Asian
vapB25 49	2.79236503716806	active	Indo-Oceanic
vapB25 49	0.469480573332554	barely active	East-Asian
vapB25 49	0.559121437133175	barely active	East-Asian
vapB25 49	2.79236503716806	active	Euro-American
vapB25 49	0.426585107007821	barely active	East-Asian
vapB25 49	2.79236503716806	active	East-African-Indian
vapB25 49	0.481163974421053	barely active	East-Asian
vapB25 49	0	barely active	East-Asian
vapB25 49	2.79236503716806	active	Indo-Oceanic
vapB25 49	0	barely active	East-Asian
vapB25 49	0.286582435229861	barely active	East-Asian
vapB25 49	0.340700758764092	barely active	East-Asian
vapB25 49	0	barely active	East-Asian
vapB25 49	0.326307991681874	barely active	East-Asian
vapB25 49	0	barely active	East-Asian
vapB25 49	2.79236503716806	active	East-African-Indian
vapB25 49	0	barely active	East-Asian
vapB25 49	0.654104184494756	barely active	East-Asian
vapB25 49	0.76675949903137	barely active	East-Asian
vapB25 49	0.248854846433728	barely active	East-Asian
vapB25 49	0.799250320398106	barely active	East-Asian
vapB25 49	0.40252066143555	barely active	East-Asian
vapB25 49	0.241612426072365	barely active	East-Asian
vapB25 49	0	barely active	East-Asian
vapB25 49	2.79236503716806	active	Euro-American
vapB25 49	0	barely active	East-Asian
vapB25 49	2.79236503716806	active	Euro-American
vapB25 49	2.79236503716806	active	Euro-American
vapB25 49	2.79236503716806	active	Euro-American
vapB25 49	2.79236503716806	active	Euro-American
vapB25 49	0.424291177518847	barely active	East-Asian
vapB25 49	0.301176417923573	barely active	East-Asian
vapB25 49	2.79236503716806	active	Euro-American
vapB25 49	2.79236503716806	active	Euro-American
vapB25 49	0.0914269505837252	barely active	East-Asian
vapB25 49	2.79236503716806	active	Euro-American
vapB25 49	0.828187854715333	barely active	East-Asian
vapB25 49	2.79236503716806	active	Euro-American
vapB25 49	2.79236503716806	active	Euro-American
vapB25 49	0.602672125139562	inactive	Indo-Oceanic
vapB25 49	0.489354077336584	inactive	Indo-Oceanic
vapB25 49	0.756116447763413	inactive	Indo-Oceanic
vapB25 49	1.42639988045875	moderately active	Euro-American
vapB25 49	2.79236503716806	active	Euro-American
vapB25 49	2.64849909880758	moderately active	Euro-American
vapB25 49	2.54760808739254	moderately active	Euro-American
vapB25 49	0.471546342676067	barely active	East-Asian
vapB25 49	2.79236503716806	active	Euro-American
vapB25 49	0.270977934899685	barely active	East-Asian
vapB25 49	2.79236503716806	active	Euro-American
vapB25 49	0.0757681654779937	barely active	East-Asian
vapB25 49	2.79236503716806	active	East-African-Indian
vapB25 49	2.79236503716806	active	M. Africanum, West African 2
vapB25 49	2.79236503716806	active	Indo-Oceanic
vapB25 49	0	inactive	Indo-Oceanic
vapB25 49	2.79236503716806	active	M. Africanum, West African 1
vapB25 49	2.79236503716806	active	M. Africanum, West African 1
vapB25 49	2.79236503716806	active	Euro-American
vapB25 49	2.79236503716806	active	Euro-American
vapB25 49	0.0490493953342906	barely active	East-Asian
vapB25 49	2.79236503716806	active	Euro-American
vapB25 49	2.79236503716806	active	East-African-Indian
vapB25 49	0.448279158434667	moderately active	Euro-American
vapB25 49	2.79236503716806	active	Indo-Oceanic
vapB25 49	2.76402110481594	active	Euro-American
vapB25 49	2.79236503716806	active	Euro-American
vapB25 49	2.79236503716806	active	Euro-American
vapB25 49	2.79236503716806	active	Euro-American
vapB25 49	2.79236503716806	active	Euro-American
vapB25 49	2.79236503716806	active	Euro-American
vapB25 49	2.79236503716806	active	Lineage 7
vapB25 49	2.79236503716806	active	Indo-Oceanic
vapB25 49	2.79236503716806	active	Indo-Oceanic
vapB25 49	2.79236503716806	active	Indo-Oceanic
vapB25 49	0.322514386727527	barely active	East-Asian
vapB25 49	2.79236503716806	active	Indo-Oceanic
vapB25 49	2.79236503716806	active	East-Asian
vapB25 49	2.68117747507246	active	Indo-Oceanic
vapB25 49	2.79236503716806	active	Indo-Oceanic
vapB25 49	2.79236503716806	active	Indo-Oceanic
vapB25 49	2.79236503716806	active	Indo-Oceanic
vapB25 49	2.79236503716806	active	Indo-Oceanic
vapB25 49	2.79236503716806	active	Indo-Oceanic
vapB25 49	0.711642456248813	barely active	East-Asian
vapB25 49	2.79236503716806	active	Euro-American
Rv0281 39	1.05945060962668	barely active	East-Asian
Rv0281 39	1.34306900274083	barely active	East-Asian
Rv0281 39	2.79236503716806	active	East-Asian
[truncated: 15,718 more rows]
