# Supplementary material for: Drivers and sites of diversity in the DNA adenine methylomes of 93 Mycobacterium tuberculosis complex clinical isolates
Source: eLife. 2020 Oct 27;9:e58542. doi: 10.7554/eLife.58542 (PMC7591249; doi:10.7554/eLife.58542)
Supplement: Figure 8—source data 1. [file elife-58542-fig8-data1.csv]

TSSid	logIPD_adj	Activity	Lineage
gyrB 18	2.46111989983636	active	East-Asian
gyrB 18	2.46111989983636	active	East-Asian
gyrB 18	0.0075322392718039	inactive	East-Asian
gyrB 18	2.46111989983636	active	East-Asian
gyrB 18	0	inactive	East-African-Indian
gyrB 18	2.37363419025377	active	East-Asian
gyrB 18	2.46111989983636	active	Indo-Oceanic
gyrB 18	2.46111989983636	active	East-Asian
gyrB 18	2.46111989983636	active	Euro-American
gyrB 18	2.46111989983636	active	East-Asian
gyrB 18	0.0567890132192936	inactive	Euro-American
gyrB 18	2.46111989983636	active	East-Asian
gyrB 18	0.0756966527953195	inactive	East-African-Indian
gyrB 18	2.46111989983636	active	East-Asian
gyrB 18	2.46111989983636	active	East-Asian
gyrB 18	2.46111989983636	active	Indo-Oceanic
gyrB 18	2.46111989983636	active	East-Asian
gyrB 18	2.46111989983636	active	East-Asian
gyrB 18	2.46111989983636	active	East-Asian
gyrB 18	2.46111989983636	active	East-Asian
gyrB 18	2.46111989983636	active	East-Asian
gyrB 18	2.46111989983636	active	East-Asian
gyrB 18	0	inactive	East-African-Indian
gyrB 18	0.221071402666995	active	East-Asian
gyrB 18	2.46111989983636	active	East-Asian
gyrB 18	2.08902542205302	active	East-Asian
gyrB 18	2.46111989983636	active	East-Asian
gyrB 18	2.46111989983636	active	East-Asian
gyrB 18	2.31856051683018	active	East-Asian
gyrB 18	2.46111989983636	active	East-Asian
gyrB 18	2.46111989983636	active	East-Asian
gyrB 18	0.49276644210097	inactive	Euro-American
gyrB 18	2.46111989983636	active	East-Asian
gyrB 18	2.46111989983636	active	Euro-American
gyrB 18	2.46111989983636	active	Euro-American
gyrB 18	2.46111989983636	active	Euro-American
gyrB 18	2.46111989983636	active	Euro-American
gyrB 18	2.46111989983636	active	Euro-American
gyrB 18	2.46111989983636	active	East-Asian
gyrB 18	2.46111989983636	active	East-Asian
gyrB 18	2.46111989983636	active	Euro-American
gyrB 18	2.46111989983636	active	Euro-American
gyrB 18	2.46111989983636	active	East-Asian
gyrB 18	2.38326648370804	active	Euro-American
gyrB 18	2.46111989983636	active	East-Asian
gyrB 18	2.45416970177334	active	Euro-American
gyrB 18	0.360772792814237	inactive	Euro-American
gyrB 18	2.46111989983636	active	Indo-Oceanic
gyrB 18	2.3119757560475	active	Indo-Oceanic
gyrB 18	2.46111989983636	active	Indo-Oceanic
gyrB 18	0.212636268082913	inactive	Euro-American
gyrB 18	2.46111989983636	active	Euro-American
gyrB 18	0.213157120524228	inactive	Euro-American
gyrB 18	0.167898295304582	inactive	Euro-American
gyrB 18	2.46111989983636	active	East-Asian
gyrB 18	0	inactive	Euro-American
gyrB 18	2.46111989983636	active	East-Asian
gyrB 18	2.46111989983636	active	Euro-American
gyrB 18	2.46111989983636	active	East-Asian
gyrB 18	0	inactive	East-African-Indian
gyrB 18	2.46111989983636	moderately active	M. Africanum, West African 2
gyrB 18	2.46111989983636	active	Indo-Oceanic
gyrB 18	2.46111989983636	active	Indo-Oceanic
gyrB 18	2.46111989983636	active	M. Africanum, West African 1
gyrB 18	2.46111989983636	active	M. Africanum, West African 1
gyrB 18	0.0942545951417075	inactive	Euro-American
gyrB 18	0.110652877757748	inactive	Euro-American
gyrB 18	2.46111989983636	active	East-Asian
gyrB 18	2.46111989983636	active	Euro-American
gyrB 18	0	inactive	East-African-Indian
gyrB 18	0.0165124644240262	inactive	Euro-American
gyrB 18	2.46111989983636	active	Indo-Oceanic
gyrB 18	0.465475241984743	inactive	Euro-American
gyrB 18	0.0473505033585211	inactive	Euro-American
gyrB 18	0	inactive	Euro-American
gyrB 18	0.627484360741655	inactive	Euro-American
gyrB 18	2.46111989983636	active	Euro-American
gyrB 18	0.240814693208165	inactive	Euro-American
gyrB 18	2.46111989983636	active	Lineage 7
gyrB 18	2.46111989983636	active	Indo-Oceanic
gyrB 18	2.46111989983636	active	Indo-Oceanic
gyrB 18	2.46111989983636	active	Indo-Oceanic
gyrB 18	2.46111989983636	active	East-Asian
gyrB 18	2.46111989983636	active	Indo-Oceanic
gyrB 18	2.46111989983636	active	East-Asian
gyrB 18	2.46111989983636	active	Indo-Oceanic
gyrB 18	2.46111989983636	active	Indo-Oceanic
gyrB 18	2.46111989983636	active	Indo-Oceanic
gyrB 18	2.46111989983636	active	Indo-Oceanic
gyrB 18	2.46111989983636	active	East-Asian
gyrB 18	2.27717578481887	active	Euro-American
gyrB 13	2.3677513569703	active	East-Asian
gyrB 13	2.46111989983636	active	East-Asian
gyrB 13	0.0513178282795024	inactive	East-Asian
gyrB 13	2.46111989983636	active	East-Asian
gyrB 13	0.160363328832138	inactive	East-African-Indian
gyrB 13	2.46111989983636	active	East-Asian
gyrB 13	2.42789362854794	active	Indo-Oceanic
gyrB 13	2.46111989983636	active	East-Asian
gyrB 13	2.34694922261767	active	Euro-American
gyrB 13	2.46111989983636	active	East-Asian
gyrB 13	0.272797362148756	inactive	Euro-American
gyrB 13	2.45237001477491	active	East-Asian
gyrB 13	0	inactive	East-African-Indian
gyrB 13	2.28085437680411	active	East-Asian
gyrB 13	2.46111989983636	active	East-Asian
gyrB 13	2.19305118086307	active	Indo-Oceanic
gyrB 13	2.46111989983636	active	East-Asian
gyrB 13	2.36507285519374	active	East-Asian
gyrB 13	2.05638279456233	active	East-Asian
gyrB 13	2.46111989983636	active	East-Asian
gyrB 13	2.46111989983636	active	East-Asian
gyrB 13	2.46111989983636	active	East-Asian
gyrB 13	0	inactive	East-African-Indian
gyrB 13	0	active	East-Asian
gyrB 13	2.46111989983636	active	East-Asian
gyrB 13	1.77518156054934	active	East-Asian
gyrB 13	2.46111989983636	active	East-Asian
gyrB 13	2.46111989983636	active	East-Asian
gyrB 13	2.46111989983636	active	East-Asian
gyrB 13	2.46111989983636	active	East-Asian
gyrB 13	2.17865340877615	active	East-Asian
gyrB 13	0	inactive	Euro-American
gyrB 13	2.46111989983636	active	East-Asian
gyrB 13	2.46111989983636	active	Euro-American
gyrB 13	2.46111989983636	active	Euro-American
gyrB 13	2.46111989983636	active	Euro-American
gyrB 13	2.46111989983636	active	Euro-American
gyrB 13	2.46111989983636	active	Euro-American
gyrB 13	2.46111989983636	active	East-Asian
gyrB 13	2.46111989983636	active	East-Asian
gyrB 13	2.46111989983636	active	Euro-American
gyrB 13	2.36716512075023	active	Euro-American
gyrB 13	2.46111989983636	active	East-Asian
gyrB 13	2.46111989983636	active	Euro-American
gyrB 13	2.46111989983636	active	East-Asian
gyrB 13	2.46111989983636	active	Euro-American
gyrB 13	0	inactive	Euro-American
gyrB 13	2.46111989983636	active	Indo-Oceanic
gyrB 13	2.28980163235825	active	Indo-Oceanic
gyrB 13	2.46111989983636	active	Indo-Oceanic
gyrB 13	0.329522662379866	inactive	Euro-American
gyrB 13	2.43032883280624	active	Euro-American
gyrB 13	0	inactive	Euro-American
gyrB 13	0.0878021478776685	inactive	Euro-American
gyrB 13	2.46111989983636	active	East-Asian
gyrB 13	0.0485434068209064	inactive	Euro-American
gyrB 13	2.46111989983636	active	East-Asian
gyrB 13	2.46111989983636	active	Euro-American
gyrB 13	2.38752187024771	active	East-Asian
gyrB 13	0	inactive	East-African-Indian
gyrB 13	2.26224602729418	moderately active	M. Africanum, West African 2
gyrB 13	2.46111989983636	active	Indo-Oceanic
gyrB 13	2.46111989983636	active	Indo-Oceanic
gyrB 13	2.43869892304059	active	M. Africanum, West African 1
gyrB 13	2.46111989983636	active	M. Africanum, West African 1
gyrB 13	0.0819762653632706	inactive	Euro-American
gyrB 13	0.144825366925537	inactive	Euro-American
gyrB 13	2.40835799112555	active	East-Asian
gyrB 13	2.29121135819929	active	Euro-American
gyrB 13	0.0993092973221052	inactive	East-African-Indian
gyrB 13	0	inactive	Euro-American
gyrB 13	2.38574043617766	active	Indo-Oceanic
gyrB 13	0	inactive	Euro-American
gyrB 13	0.0941447148374624	inactive	Euro-American
gyrB 13	0.495587177062689	inactive	Euro-American
gyrB 13	0.132079959103435	inactive	Euro-American
gyrB 13	2.17073671753586	active	Euro-American
gyrB 13	0.0651533222167083	inactive	Euro-American
gyrB 13	2.46111989983636	active	Lineage 7
gyrB 13	2.46111989983636	active	Indo-Oceanic
gyrB 13	2.46111989983636	active	Indo-Oceanic
gyrB 13	2.46111989983636	active	Indo-Oceanic
gyrB 13	2.37952711718233	active	East-Asian
gyrB 13	2.46111989983636	active	Indo-Oceanic
gyrB 13	2.42710518737287	active	East-Asian
gyrB 13	2.4400021574707	active	Indo-Oceanic
gyrB 13	2.41555510221519	active	Indo-Oceanic
gyrB 13	2.46111989983636	active	Indo-Oceanic
gyrB 13	2.37554196508641	active	Indo-Oceanic
gyrB 13	2.46111989983636	active	East-Asian
gyrB 13	2.12790305815828	active	Euro-American
Rv0029 12	2.43229521229498	active	East-Asian
Rv0029 12	2.20196633854359	active	East-Asian
Rv0029 12	0	inactive	East-Asian
Rv0029 12	2.46111989983636	active	East-Asian
Rv0029 12	0.0917866948951149	inactive	East-African-Indian
Rv0029 12	2.33343172711556	active	East-Asian
Rv0029 12	2.35527957391494	active	Indo-Oceanic
Rv0029 12	2.46111989983636	active	East-Asian
Rv0029 12	2.46111989983636	active	Euro-American
Rv0029 12	2.10671609873504	active	East-Asian
Rv0029 12	0.269077476011642	inactive	Euro-American
Rv0029 12	2.33646680361831	active	East-Asian
Rv0029 12	0.0585555199739257	inactive	East-African-Indian
Rv0029 12	2.13543737238642	active	East-Asian
Rv0029 12	2.21975068453387	active	East-Asian
Rv0029 12	2.46111989983636	active	Indo-Oceanic
Rv0029 12	1.78847472472232	active	East-Asian
Rv0029 12	2.33011467360473	active	East-Asian
Rv0029 12	2.12948255907216	active	East-Asian
Rv0029 12	1.97346961676637	active	East-Asian
Rv0029 12	2.38520168073544	active	East-Asian
Rv0029 12	2.41429173728952	active	East-Asian
Rv0029 12	0	inactive	East-African-Indian
Rv0029 12	0	active	East-Asian
Rv0029 12	2.07652554832035	active	East-Asian
Rv0029 12	2.46111989983636	active	East-Asian
Rv0029 12	2.46111989983636	active	East-Asian
Rv0029 12	2.25339458975162	active	East-Asian
Rv0029 12	1.94958215540793	active	East-Asian
Rv0029 12	2.46111989983636	active	East-Asian
Rv0029 12	2.46111989983636	active	East-Asian
Rv0029 12	0	inactive	Euro-American
Rv0029 12	2.03775385794317	active	East-Asian
Rv0029 12	1.92658359091677	active	Euro-American
Rv0029 12	2.0528924023305	active	Euro-American
Rv0029 12	2.36142945769547	active	Euro-American
Rv0029 12	2.46111989983636	active	Euro-American
Rv0029 12	2.2957862034529	active	Euro-American
Rv0029 12	1.65710264152317	active	East-Asian
Rv0029 12	1.84338927118539	active	East-Asian
Rv0029 12	2.37749457409086	active	Euro-American
Rv0029 12	2.46111989983636	active	Euro-American
Rv0029 12	2.37789950768908	active	East-Asian
Rv0029 12	2.46111989983636	active	Euro-American
Rv0029 12	2.46111989983636	active	East-Asian
Rv0029 12	2.05866297185142	active	Euro-American
Rv0029 12	0	inactive	Euro-American
Rv0029 12	2.35708988826512	active	Indo-Oceanic
Rv0029 12	2.46111989983636	active	Indo-Oceanic
Rv0029 12	2.33148293694546	active	Indo-Oceanic
Rv0029 12	0.119352298376815	inactive	Euro-American
Rv0029 12	0	inactive	Euro-American
Rv0029 12	0.0360971309188307	inactive	Euro-American
Rv0029 12	2.46111989983636	active	East-Asian
Rv0029 12	0	inactive	Euro-American
Rv0029 12	2.46111989983636	active	East-Asian
Rv0029 12	2.26478039670564	active	Euro-American
Rv0029 12	2.46111989983636	active	East-Asian
Rv0029 12	0.367494926078338	inactive	East-African-Indian
Rv0029 12	1.85160297259756	moderately active	M. Africanum, West African 2
Rv0029 12	2.46111989983636	active	Indo-Oceanic
Rv0029 12	2.46111989983636	active	Indo-Oceanic
Rv0029 12	2.46111989983636	active	M. Africanum, West African 1
Rv0029 12	2.46111989983636	active	M. Africanum, West African 1
Rv0029 12	0	inactive	Euro-American
Rv0029 12	0.116175162168791	inactive	Euro-American
Rv0029 12	2.23194709546296	active	East-Asian
Rv0029 12	2.14921326452666	active	Euro-American
Rv0029 12	0.316088112195027	inactive	East-African-Indian
Rv0029 12	0.111358349071831	inactive	Euro-American
Rv0029 12	2.30663095489646	active	Indo-Oceanic
Rv0029 12	0	inactive	Euro-American
Rv0029 12	0	inactive	Euro-American
Rv0029 12	0	inactive	Euro-American
Rv0029 12	0.223038926184357	inactive	Euro-American
Rv0029 12	2.46111989983636	active	Euro-American
Rv0029 12	0	inactive	Euro-American
Rv0029 12	2.32597381423953	active	Lineage 7
Rv0029 12	2.46111989983636	active	Indo-Oceanic
Rv0029 12	2.42272837677319	active	Indo-Oceanic
Rv0029 12	2.07725744517415	active	Indo-Oceanic
Rv0029 12	2.46111989983636	active	East-Asian
Rv0029 12	2.46111989983636	active	Indo-Oceanic
Rv0029 12	2.19669351804355	active	East-Asian
Rv0029 12	2.46111989983636	active	Indo-Oceanic
Rv0029 12	2.46111989983636	active	Indo-Oceanic
Rv0029 12	2.46111989983636	active	Indo-Oceanic
Rv0029 12	2.04267495359541	active	Indo-Oceanic
Rv0029 12	2.4498944106827	active	Indo-Oceanic
Rv0029 12	2.26353825576898	active	Indo-Oceanic
Rv0029 12	2.46111989983636	active	East-Asian
Rv0061c 5	2.46111989983636	active	East-Asian
Rv0061c 5	2.46111989983636	active	East-Asian
Rv0061c 5	0	inactive	East-Asian
Rv0061c 5	2.46111989983636	active	East-Asian
Rv0061c 5	0.0487179730032289	inactive	East-African-Indian
Rv0061c 5	2.46111989983636	active	East-Asian
Rv0061c 5	2.46111989983636	active	Indo-Oceanic
Rv0061c 5	2.46111989983636	active	East-Asian
Rv0061c 5	2.46111989983636	active	Euro-American
Rv0061c 5	2.46111989983636	active	East-Asian
Rv0061c 5	0.270318504080332	inactive	Euro-American
Rv0061c 5	2.46111989983636	active	East-Asian
Rv0061c 5	0	inactive	East-African-Indian
Rv0061c 5	2.46111989983636	active	East-Asian
Rv0061c 5	2.46111989983636	active	East-Asian
Rv0061c 5	2.46111989983636	active	Indo-Oceanic
Rv0061c 5	2.46111989983636	active	East-Asian
Rv0061c 5	2.46111989983636	active	East-Asian
Rv0061c 5	2.46111989983636	active	East-Asian
Rv0061c 5	2.46111989983636	active	East-Asian
Rv0061c 5	2.46111989983636	active	East-Asian
Rv0061c 5	2.46111989983636	active	East-Asian
Rv0061c 5	0	inactive	East-African-Indian
Rv0061c 5	0.547721907796761	active	East-Asian
Rv0061c 5	2.46111989983636	active	East-Asian
Rv0061c 5	2.31637961896033	active	East-Asian
Rv0061c 5	2.46111989983636	active	East-Asian
Rv0061c 5	2.46111989983636	active	East-Asian
Rv0061c 5	2.46111989983636	active	East-Asian
Rv0061c 5	2.46111989983636	active	East-Asian
Rv0061c 5	2.46111989983636	active	East-Asian
Rv0061c 5	2.46111989983636	active	East-Asian
Rv0061c 5	2.46111989983636	active	Euro-American
Rv0061c 5	2.3901444411433	active	Euro-American
Rv0061c 5	2.13433746310026	active	Euro-American
Rv0061c 5	2.46111989983636	active	Euro-American
Rv0061c 5	2.46111989983636	active	East-Asian
Rv0061c 5	2.46111989983636	active	East-Asian
Rv0061c 5	2.46111989983636	active	Euro-American
Rv0061c 5	2.46111989983636	active	Euro-American
Rv0061c 5	2.46111989983636	active	East-Asian
Rv0061c 5	2.30507175332784	active	Euro-American
Rv0061c 5	2.46111989983636	active	East-Asian
Rv0061c 5	2.46111989983636	active	Euro-American
Rv0061c 5	0.316717612736301	inactive	Euro-American
Rv0061c 5	2.46111989983636	active	Indo-Oceanic
Rv0061c 5	2.46111989983636	active	Indo-Oceanic
Rv0061c 5	2.46111989983636	active	Indo-Oceanic
Rv0061c 5	2.37329344451786	active	Euro-American
Rv0061c 5	0	inactive	Euro-American
Rv0061c 5	0.124396656667996	inactive	Euro-American
Rv0061c 5	2.46111989983636	active	East-Asian
Rv0061c 5	0.168721054410559	inactive	Euro-American
Rv0061c 5	2.46111989983636	active	East-Asian
Rv0061c 5	2.46111989983636	active	Euro-American
Rv0061c 5	2.46111989983636	active	East-Asian
Rv0061c 5	0.0533561792965383	inactive	East-African-Indian
Rv0061c 5	2.18696313943771	moderately active	M. Africanum, West African 2
Rv0061c 5	2.46111989983636	active	Indo-Oceanic
Rv0061c 5	2.46111989983636	active	Indo-Oceanic
Rv0061c 5	2.46111989983636	active	M. Africanum, West African 1
Rv0061c 5	2.46111989983636	active	M. Africanum, West African 1
Rv0061c 5	0.272907725048739	inactive	Euro-American
Rv0061c 5	0	inactive	Euro-American
Rv0061c 5	2.46111989983636	active	East-Asian
Rv0061c 5	0	inactive	East-African-Indian
Rv0061c 5	0.290237148508276	inactive	Euro-American
Rv0061c 5	0	inactive	Euro-American
Rv0061c 5	0.154265707275033	inactive	Euro-American
Rv0061c 5	0	inactive	Euro-American
Rv0061c 5	0.0740675743172786	inactive	Euro-American
Rv0061c 5	2.46111989983636	active	Euro-American
Rv0061c 5	0	inactive	Euro-American
Rv0061c 5	2.46111989983636	active	Lineage 7
Rv0061c 5	2.46111989983636	active	Indo-Oceanic
Rv0061c 5	2.43652915454745	active	Indo-Oceanic
Rv0061c 5	2.46111989983636	active	East-Asian
Rv0061c 5	2.4152553196062	active	Indo-Oceanic
Rv0061c 5	2.46111989983636	active	East-Asian
Rv0061c 5	2.46111989983636	active	Indo-Oceanic
Rv0061c 5	2.46111989983636	active	Indo-Oceanic
Rv0061c 5	2.46111989983636	active	Indo-Oceanic
Rv0061c 5	2.40725082481375	active	Indo-Oceanic
Rv0061c 5	2.46111989983636	active	Indo-Oceanic
Rv0061c 5	2.46111989983636	active	Indo-Oceanic
Rv0061c 5	2.46111989983636	active	East-Asian
Rv0061c 5	2.38818460359944	active	Euro-American
Rv0061c 12	2.46111989983636	active	East-Asian
Rv0061c 12	2.46111989983636	active	East-Asian
Rv0061c 12	0.210537187455513	inactive	East-Asian
Rv0061c 12	2.46111989983636	active	East-Asian
Rv0061c 12	0	inactive	East-African-Indian
Rv0061c 12	2.15969873359574	active	East-Asian
Rv0061c 12	2.46111989983636	active	Indo-Oceanic
Rv0061c 12	2.46111989983636	active	East-Asian
Rv0061c 12	2.46111989983636	active	Euro-American
Rv0061c 12	2.46111989983636	active	East-Asian
Rv0061c 12	0	inactive	Euro-American
Rv0061c 12	2.46111989983636	active	East-Asian
Rv0061c 12	0	inactive	East-African-Indian
Rv0061c 12	2.46111989983636	active	East-Asian
Rv0061c 12	2.46111989983636	active	East-Asian
Rv0061c 12	2.46111989983636	active	Indo-Oceanic
Rv0061c 12	2.46111989983636	active	East-Asian
Rv0061c 12	2.46111989983636	active	East-Asian
Rv0061c 12	2.46111989983636	active	East-Asian
Rv0061c 12	2.46111989983636	active	East-Asian
Rv0061c 12	2.46111989983636	active	East-Asian
Rv0061c 12	2.46111989983636	active	East-Asian
Rv0061c 12	0	inactive	East-African-Indian
Rv0061c 12	0.203888390993638	active	East-Asian
Rv0061c 12	2.46111989983636	active	East-Asian
Rv0061c 12	2.46111989983636	active	East-Asian
Rv0061c 12	2.46111989983636	active	East-Asian
Rv0061c 12	2.46111989983636	active	East-Asian
Rv0061c 12	2.03751069763423	active	East-Asian
Rv0061c 12	2.46111989983636	active	East-Asian
Rv0061c 12	2.46111989983636	active	East-Asian
Rv0061c 12	2.46111989983636	active	East-Asian
Rv0061c 12	2.46111989983636	active	Euro-American
Rv0061c 12	2.42333808190118	active	Euro-American
Rv0061c 12	2.46111989983636	active	Euro-American
Rv0061c 12	2.46111989983636	active	Euro-American
Rv0061c 12	2.46111989983636	active	East-Asian
Rv0061c 12	2.46111989983636	active	East-Asian
Rv0061c 12	2.42160661405827	active	Euro-American
Rv0061c 12	2.46111989983636	active	Euro-American
Rv0061c 12	2.46111989983636	active	East-Asian
Rv0061c 12	2.46111989983636	active	Euro-American
Rv0061c 12	2.42302622999169	active	East-Asian
Rv0061c 12	2.46111989983636	active	Euro-American
Rv0061c 12	0	inactive	Euro-American
Rv0061c 12	2.46111989983636	active	Indo-Oceanic
Rv0061c 12	2.46111989983636	active	Indo-Oceanic
Rv0061c 12	2.46111989983636	active	Indo-Oceanic
Rv0061c 12	2.4317055816853	active	Euro-American
Rv0061c 12	0.419695590659839	inactive	Euro-American
Rv0061c 12	0.104181075446595	inactive	Euro-American
Rv0061c 12	2.46111989983636	active	East-Asian
Rv0061c 12	0	inactive	Euro-American
Rv0061c 12	2.46111989983636	active	East-Asian
Rv0061c 12	2.46111989983636	active	Euro-American
Rv0061c 12	2.46111989983636	active	East-Asian
Rv0061c 12	0	inactive	East-African-Indian
Rv0061c 12	1.96590964630956	moderately active	M. Africanum, West African 2
Rv0061c 12	2.46111989983636	active	Indo-Oceanic
Rv0061c 12	2.37325607804768	active	Indo-Oceanic
Rv0061c 12	2.46111989983636	active	M. Africanum, West African 1
Rv0061c 12	2.46111989983636	active	M. Africanum, West African 1
Rv0061c 12	0.164514539145221	inactive	Euro-American
Rv0061c 12	0.0455791296361784	inactive	Euro-American
Rv0061c 12	2.46111989983636	active	East-Asian
Rv0061c 12	0.173029716605396	inactive	East-African-Indian
Rv0061c 12	0.575887615678956	inactive	Euro-American
Rv0061c 12	0.0217834732465946	inactive	Euro-American
Rv0061c 12	0.00642023930363922	inactive	Euro-American
Rv0061c 12	0.308468496755999	inactive	Euro-American
Rv0061c 12	0	inactive	Euro-American
Rv0061c 12	2.46111989983636	active	Euro-American
Rv0061c 12	0	inactive	Euro-American
Rv0061c 12	2.46111989983636	active	Lineage 7
Rv0061c 12	2.43539771464411	active	Indo-Oceanic
Rv0061c 12	2.46111989983636	active	Indo-Oceanic
Rv0061c 12	2.46111989983636	active	East-Asian
Rv0061c 12	2.46111989983636	active	Indo-Oceanic
Rv0061c 12	2.46111989983636	active	East-Asian
Rv0061c 12	2.43809868621423	active	Indo-Oceanic
Rv0061c 12	2.46111989983636	active	Indo-Oceanic
Rv0061c 12	2.46111989983636	active	Indo-Oceanic
Rv0061c 12	2.36141163625152	active	Indo-Oceanic
Rv0061c 12	2.46111989983636	active	Indo-Oceanic
Rv0061c 12	2.46111989983636	active	Indo-Oceanic
Rv0061c 12	2.23551490300774	active	East-Asian
Rv0061c 12	2.46111989983636	active	Euro-American
Rv0250c 5	2.46111989983636	active	East-Asian
Rv0250c 5	2.01819269720214	active	East-Asian
Rv0250c 5	0	inactive	East-Asian
Rv0250c 5	2.46111989983636	active	East-Asian
Rv0250c 5	0	inactive	East-African-Indian
Rv0250c 5	2.46111989983636	active	East-Asian
Rv0250c 5	2.46111989983636	active	Indo-Oceanic
Rv0250c 5	2.46111989983636	active	East-Asian
Rv0250c 5	2.46111989983636	active	Euro-American
Rv0250c 5	2.46111989983636	active	East-Asian
Rv0250c 5	0	inactive	Euro-American
Rv0250c 5	2.46111989983636	active	East-Asian
Rv0250c 5	0.0251212922423924	inactive	East-African-Indian
Rv0250c 5	2.46111989983636	active	East-Asian
Rv0250c 5	2.46111989983636	active	East-Asian
Rv0250c 5	2.20196794636706	active	Indo-Oceanic
Rv0250c 5	2.46111989983636	active	East-Asian
Rv0250c 5	2.46111989983636	active	East-Asian
Rv0250c 5	2.46111989983636	active	East-Asian
Rv0250c 5	2.23961992422826	active	East-Asian
Rv0250c 5	2.46111989983636	active	East-Asian
Rv0250c 5	2.46111989983636	active	East-Asian
Rv0250c 5	0.0214401924340867	inactive	East-African-Indian
Rv0250c 5	0.287827209493534	active	East-Asian
Rv0250c 5	2.38951556893253	active	East-Asian
Rv0250c 5	2.46111989983636	active	East-Asian
Rv0250c 5	2.44125642469214	active	East-Asian
Rv0250c 5	2.43723715861958	active	East-Asian
Rv0250c 5	2.46111989983636	active	East-Asian
Rv0250c 5	2.46111989983636	active	East-Asian
Rv0250c 5	2.46111989983636	active	East-Asian
Rv0250c 5	0	inactive	Euro-American
Rv0250c 5	2.44687996888662	active	East-Asian
Rv0250c 5	2.46111989983636	active	Euro-American
Rv0250c 5	2.46111989983636	active	Euro-American
Rv0250c 5	2.46111989983636	active	Euro-American
Rv0250c 5	2.46111989983636	active	Euro-American
Rv0250c 5	2.46111989983636	active	Euro-American
Rv0250c 5	2.46111989983636	active	East-Asian
Rv0250c 5	2.46111989983636	active	East-Asian
Rv0250c 5	2.46111989983636	active	Euro-American
Rv0250c 5	2.46111989983636	active	Euro-American
Rv0250c 5	2.46111989983636	active	East-Asian
Rv0250c 5	2.46111989983636	active	Euro-American
Rv0250c 5	2.46111989983636	active	East-Asian
Rv0250c 5	2.46111989983636	active	Euro-American
Rv0250c 5	0	inactive	Euro-American
Rv0250c 5	2.46111989983636	active	Indo-Oceanic
Rv0250c 5	2.46111989983636	active	Indo-Oceanic
Rv0250c 5	2.46111989983636	active	Indo-Oceanic
Rv0250c 5	0.355841212225484	inactive	Euro-American
Rv0250c 5	2.45409879926878	active	Euro-American
Rv0250c 5	0	inactive	Euro-American
Rv0250c 5	0.222682702560973	inactive	Euro-American
Rv0250c 5	2.46111989983636	active	East-Asian
Rv0250c 5	0.203167200425092	inactive	Euro-American
Rv0250c 5	2.46111989983636	active	East-Asian
Rv0250c 5	2.46111989983636	active	Euro-American
Rv0250c 5	2.46111989983636	active	East-Asian
Rv0250c 5	0.300115045417502	inactive	East-African-Indian
Rv0250c 5	1.82761321512506	moderately active	M. Africanum, West African 2
Rv0250c 5	2.46111989983636	active	Indo-Oceanic
Rv0250c 5	2.46111989983636	active	Indo-Oceanic
Rv0250c 5	2.46111989983636	active	M. Africanum, West African 1
Rv0250c 5	2.46111989983636	active	M. Africanum, West African 1
Rv0250c 5	0	inactive	Euro-American
Rv0250c 5	0	inactive	Euro-American
Rv0250c 5	2.46111989983636	active	East-Asian
Rv0250c 5	2.29333230057146	active	Euro-American
Rv0250c 5	0	inactive	East-African-Indian
Rv0250c 5	0.281739971831736	inactive	Euro-American
Rv0250c 5	2.46111989983636	active	Indo-Oceanic
Rv0250c 5	0	inactive	Euro-American
Rv0250c 5	0.0602638221616848	inactive	Euro-American
Rv0250c 5	0.401041540555688	inactive	Euro-American
Rv0250c 5	0.0657841350583366	inactive	Euro-American
Rv0250c 5	2.46111989983636	active	Euro-American
Rv0250c 5	0	inactive	Euro-American
Rv0250c 5	2.46111989983636	active	Lineage 7
Rv0250c 5	2.46111989983636	active	Indo-Oceanic
Rv0250c 5	2.46111989983636	active	Indo-Oceanic
Rv0250c 5	2.46111989983636	active	Indo-Oceanic
Rv0250c 5	2.46111989983636	active	East-Asian
Rv0250c 5	2.28957139078789	active	Indo-Oceanic
Rv0250c 5	2.46111989983636	active	East-Asian
Rv0250c 5	2.46111989983636	active	Indo-Oceanic
Rv0250c 5	2.46111989983636	active	Indo-Oceanic
Rv0250c 5	2.46111989983636	active	Indo-Oceanic
Rv0250c 5	2.46111989983636	active	Indo-Oceanic
Rv0250c 5	2.08835103875982	active	Indo-Oceanic
Rv0250c 5	2.39965763373406	active	Indo-Oceanic
Rv0250c 5	2.46111989983636	active	East-Asian
Rv0250c 5	2.46111989983636	active	Euro-American
Rv0250c 12	2.46111989983636	active	East-Asian
Rv0250c 12	2.46111989983636	active	East-Asian
Rv0250c 12	0	inactive	East-Asian
Rv0250c 12	2.46111989983636	active	East-Asian
Rv0250c 12	0	inactive	East-African-Indian
Rv0250c 12	2.46111989983636	active	East-Asian
Rv0250c 12	2.46111989983636	active	Indo-Oceanic
Rv0250c 12	2.46111989983636	active	East-Asian
Rv0250c 12	2.46111989983636	active	Euro-American
Rv0250c 12	2.46111989983636	active	East-Asian
Rv0250c 12	0	inactive	Euro-American
Rv0250c 12	2.46111989983636	active	East-Asian
Rv0250c 12	0.260689102326574	inactive	East-African-Indian
Rv0250c 12	2.46111989983636	active	East-Asian
Rv0250c 12	2.46111989983636	active	East-Asian
Rv0250c 12	2.46111989983636	active	Indo-Oceanic
Rv0250c 12	2.46111989983636	active	East-Asian
Rv0250c 12	2.46111989983636	active	East-Asian
Rv0250c 12	2.46111989983636	active	East-Asian
Rv0250c 12	2.46111989983636	active	East-Asian
Rv0250c 12	2.46111989983636	active	East-Asian
Rv0250c 12	2.46111989983636	active	East-Asian
Rv0250c 12	0.369468004894309	inactive	East-African-Indian
Rv0250c 12	0.202558105015668	active	East-Asian
Rv0250c 12	2.46111989983636	active	East-Asian
Rv0250c 12	2.46111989983636	active	East-Asian
Rv0250c 12	2.46111989983636	active	East-Asian
Rv0250c 12	2.46111989983636	active	East-Asian
Rv0250c 12	2.46111989983636	active	East-Asian
Rv0250c 12	2.46111989983636	active	East-Asian
Rv0250c 12	2.46111989983636	active	East-Asian
Rv0250c 12	0.238193615015372	inactive	Euro-American
Rv0250c 12	2.46111989983636	active	East-Asian
Rv0250c 12	2.46111989983636	active	Euro-American
Rv0250c 12	2.46111989983636	active	Euro-American
Rv0250c 12	2.46111989983636	active	Euro-American
Rv0250c 12	2.46111989983636	active	Euro-American
Rv0250c 12	2.46111989983636	active	Euro-American
Rv0250c 12	2.43282524752073	active	East-Asian
Rv0250c 12	2.46111989983636	active	East-Asian
Rv0250c 12	2.46111989983636	active	Euro-American
Rv0250c 12	2.46111989983636	active	Euro-American
Rv0250c 12	2.46111989983636	active	East-Asian
Rv0250c 12	2.46111989983636	active	Euro-American
Rv0250c 12	2.46111989983636	active	East-Asian
Rv0250c 12	2.46111989983636	active	Euro-American
Rv0250c 12	0	inactive	Euro-American
Rv0250c 12	2.46111989983636	active	Indo-Oceanic
Rv0250c 12	2.46111989983636	active	Indo-Oceanic
Rv0250c 12	2.46111989983636	active	Indo-Oceanic
Rv0250c 12	0	inactive	Euro-American
Rv0250c 12	2.46111989983636	active	Euro-American
Rv0250c 12	0.503738370946472	inactive	Euro-American
Rv0250c 12	0	inactive	Euro-American
Rv0250c 12	2.46111989983636	active	East-Asian
Rv0250c 12	0	inactive	Euro-American
Rv0250c 12	2.46111989983636	active	East-Asian
Rv0250c 12	2.46111989983636	active	Euro-American
Rv0250c 12	2.46111989983636	active	East-Asian
Rv0250c 12	0	inactive	East-African-Indian
Rv0250c 12	1.99303682433243	moderately active	M. Africanum, West African 2
Rv0250c 12	2.46111989983636	active	Indo-Oceanic
Rv0250c 12	2.46111989983636	active	Indo-Oceanic
Rv0250c 12	2.46111989983636	active	M. Africanum, West African 1
Rv0250c 12	2.46111989983636	active	M. Africanum, West African 1
Rv0250c 12	0.206593471013242	inactive	Euro-American
Rv0250c 12	0	inactive	Euro-American
Rv0250c 12	2.46111989983636	active	East-Asian
Rv0250c 12	2.46111989983636	active	Euro-American
Rv0250c 12	0.278232748452021	inactive	East-African-Indian
Rv0250c 12	0.269513669498477	inactive	Euro-American
Rv0250c 12	2.46111989983636	active	Indo-Oceanic
Rv0250c 12	0	inactive	Euro-American
Rv0250c 12	0	inactive	Euro-American
Rv0250c 12	0	inactive	Euro-American
Rv0250c 12	0.326046791642077	inactive	Euro-American
Rv0250c 12	2.46111989983636	active	Euro-American
Rv0250c 12	0	inactive	Euro-American
Rv0250c 12	2.46111989983636	active	Lineage 7
Rv0250c 12	2.46111989983636	active	Indo-Oceanic
Rv0250c 12	2.46111989983636	active	Indo-Oceanic
Rv0250c 12	2.46111989983636	active	Indo-Oceanic
Rv0250c 12	2.46111989983636	active	East-Asian
Rv0250c 12	2.46111989983636	active	Indo-Oceanic
Rv0250c 12	2.46111989983636	active	East-Asian
Rv0250c 12	2.46111989983636	active	Indo-Oceanic
Rv0250c 12	2.46111989983636	active	Indo-Oceanic
Rv0250c 12	2.46111989983636	active	Indo-Oceanic
Rv0250c 12	2.46111989983636	active	Indo-Oceanic
Rv0250c 12	2.46111989983636	active	Indo-Oceanic
Rv0250c 12	2.46111989983636	active	Indo-Oceanic
Rv0250c 12	2.46111989983636	active	East-Asian
Rv0250c 12	2.46111989983636	active	Euro-American
mazF1 9	2.46111989983636	active	East-Asian
mazF1 9	2.3403477915457	active	East-Asian
mazF1 9	0.466703090616771	inactive	East-Asian
mazF1 9	2.46111989983636	active	East-Asian
mazF1 9	0	inactive	East-African-Indian
mazF1 9	2.46111989983636	active	East-Asian
mazF1 9	2.46111989983636	active	Indo-Oceanic
mazF1 9	2.25450562355859	active	East-Asian
mazF1 9	2.46111989983636	active	Euro-American
mazF1 9	1.39192239000108	active	East-Asian
mazF1 9	0	inactive	Euro-American
mazF1 9	2.46111989983636	active	East-Asian
mazF1 9	0	inactive	East-African-Indian
mazF1 9	1.91206385951886	active	East-Asian
mazF1 9	2.45468144880926	active	East-Asian
mazF1 9	2.31982380312477	active	Indo-Oceanic
mazF1 9	2.15576170008197	active	East-Asian
mazF1 9	2.15022198286991	active	East-Asian
mazF1 9	2.23164802194517	active	East-Asian
mazF1 9	2.05325247116325	active	East-Asian
mazF1 9	2.12597038681333	active	East-Asian
mazF1 9	2.35189367349105	active	East-Asian
mazF1 9	0	inactive	East-African-Indian
mazF1 9	0	active	East-Asian
mazF1 9	2.26536236613444	active	East-Asian
mazF1 9	2.2123026208841	active	East-Asian
mazF1 9	2.08358899701262	active	East-Asian
mazF1 9	2.10812226246002	active	East-Asian
mazF1 9	2.02554116013695	active	East-Asian
mazF1 9	1.70238049227248	active	East-Asian
mazF1 9	2.32915427305495	active	East-Asian
mazF1 9	0	inactive	Euro-American
mazF1 9	1.46724010133496	active	East-Asian
mazF1 9	2.29054955954376	active	Euro-American
mazF1 9	2.12828774561237	active	Euro-American
mazF1 9	2.1824428888794	active	Euro-American
mazF1 9	2.21327906656765	active	Euro-American
mazF1 9	1.91001766727336	active	Euro-American
mazF1 9	2.46111989983636	active	East-Asian
mazF1 9	2.46111989983636	active	East-Asian
mazF1 9	2.06931687462933	active	Euro-American
mazF1 9	2.15767465592383	active	Euro-American
mazF1 9	2.35114604181079	active	East-Asian
mazF1 9	2.46111989983636	active	Euro-American
mazF1 9	2.46111989983636	active	East-Asian
mazF1 9	2.26405875181727	active	Euro-American
mazF1 9	0	inactive	Euro-American
mazF1 9	2.19509378284816	active	Indo-Oceanic
mazF1 9	2.25637125445704	active	Indo-Oceanic
mazF1 9	2.46111989983636	active	Indo-Oceanic
mazF1 9	0.432033214601438	inactive	Euro-American
mazF1 9	2.36697464267874	active	Euro-American
mazF1 9	0	inactive	Euro-American
mazF1 9	0.0919143455527049	inactive	Euro-American
mazF1 9	2.30583456113401	active	East-Asian
mazF1 9	0	inactive	Euro-American
mazF1 9	2.46111989983636	active	East-Asian
mazF1 9	2.46111989983636	active	Euro-American
mazF1 9	2.46111989983636	active	East-Asian
mazF1 9	0	inactive	East-African-Indian
mazF1 9	1.25666044603755	moderately active	M. Africanum, West African 2
mazF1 9	2.46111989983636	active	Indo-Oceanic
mazF1 9	2.38439034445199	active	Indo-Oceanic
mazF1 9	2.46111989983636	active	M. Africanum, West African 1
mazF1 9	2.46111989983636	active	M. Africanum, West African 1
mazF1 9	0	inactive	Euro-American
mazF1 9	0	inactive	Euro-American
mazF1 9	2.31772484468309	active	East-Asian
mazF1 9	2.07436718879756	active	Euro-American
mazF1 9	0	inactive	East-African-Indian
mazF1 9	0	inactive	Euro-American
mazF1 9	2.46111989983636	active	Indo-Oceanic
mazF1 9	0	inactive	Euro-American
mazF1 9	0	inactive	Euro-American
mazF1 9	0	inactive	Euro-American
mazF1 9	0	inactive	Euro-American
mazF1 9	2.14810827853959	active	Euro-American
mazF1 9	0	inactive	Euro-American
mazF1 9	2.33615519058777	active	Lineage 7
mazF1 9	2.33453420387025	active	Indo-Oceanic
mazF1 9	2.42710764795104	active	Indo-Oceanic
mazF1 9	2.46111989983636	active	Indo-Oceanic
mazF1 9	1.93155472560039	active	East-Asian
mazF1 9	2.46111989983636	active	Indo-Oceanic
mazF1 9	2.17598995540043	active	East-Asian
mazF1 9	1.85041257690449	active	Indo-Oceanic
mazF1 9	2.24927245537031	active	Indo-Oceanic
mazF1 9	2.46111989983636	active	Indo-Oceanic
mazF1 9	2.2714794756442	active	Indo-Oceanic
mazF1 9	1.96036106102194	active	Indo-Oceanic
mazF1 9	2.27173282205303	active	Indo-Oceanic
mazF1 9	2.46111989983636	active	East-Asian
mazF1 9	1.77267495411474	active	Euro-American
mazF1 16	2.14938881267001	active	East-Asian
mazF1 16	1.9716687191218	active	East-Asian
mazF1 16	0.044344904889531	inactive	East-Asian
mazF1 16	2.10622426403695	active	East-Asian
mazF1 16	0	inactive	East-African-Indian
mazF1 16	2.22904182472577	active	East-Asian
mazF1 16	2.23018131075771	active	Indo-Oceanic
mazF1 16	2.2346403177333	active	East-Asian
mazF1 16	2.10652936755221	active	Euro-American
mazF1 16	1.28610294272676	active	East-Asian
mazF1 16	0	inactive	Euro-American
mazF1 16	2.46111989983636	active	East-Asian
mazF1 16	0.110766319322571	inactive	East-African-Indian
mazF1 16	1.99727986175271	active	East-Asian
mazF1 16	2.21165787559697	active	East-Asian
mazF1 16	2.19602956370045	active	Indo-Oceanic
mazF1 16	2.36458764291674	active	East-Asian
mazF1 16	2.14272921557942	active	East-Asian
mazF1 16	1.93008316141043	active	East-Asian
mazF1 16	2.09484656045092	active	East-Asian
mazF1 16	2.15821266079664	active	East-Asian
mazF1 16	2.33476863438911	active	East-Asian
mazF1 16	0	inactive	East-African-Indian
mazF1 16	0.299073914668268	active	East-Asian
mazF1 16	2.32542499069452	active	East-Asian
mazF1 16	2.00630492981676	active	East-Asian
mazF1 16	2.27268030043772	active	East-Asian
mazF1 16	2.19827767756602	active	East-Asian
mazF1 16	2.24884547441131	active	East-Asian
mazF1 16	2.17770997976053	active	East-Asian
mazF1 16	2.30573386594195	active	East-Asian
mazF1 16	0.0925411370107401	inactive	Euro-American
mazF1 16	2.20161557803546	active	East-Asian
mazF1 16	2.35325933992621	active	Euro-American
mazF1 16	2.46111989983636	active	Euro-American
mazF1 16	2.09473360861792	active	Euro-American
mazF1 16	2.37384089648475	active	Euro-American
mazF1 16	2.13892938185495	active	Euro-American
mazF1 16	2.05534019257321	active	East-Asian
mazF1 16	2.15766379352932	active	East-Asian
mazF1 16	2.37865756894698	active	Euro-American
mazF1 16	2.31795869997385	active	Euro-American
mazF1 16	2.37402872526502	active	East-Asian
mazF1 16	2.38038051547043	active	Euro-American
mazF1 16	2.19707531419737	active	East-Asian
mazF1 16	2.01700897016487	active	Euro-American
mazF1 16	0	inactive	Euro-American
mazF1 16	2.39616497043779	active	Indo-Oceanic
mazF1 16	2.46111989983636	active	Indo-Oceanic
mazF1 16	2.46111989983636	active	Indo-Oceanic
mazF1 16	0	inactive	Euro-American
mazF1 16	1.96606822037799	active	Euro-American
mazF1 16	0	inactive	Euro-American
mazF1 16	0	inactive	Euro-American
mazF1 16	2.46111989983636	active	East-Asian
mazF1 16	0	inactive	Euro-American
mazF1 16	2.06322414606952	active	East-Asian
mazF1 16	2.16706222987843	active	Euro-American
mazF1 16	1.81191147689701	active	East-Asian
mazF1 16	0	inactive	East-African-Indian
mazF1 16	1.05057204337895	moderately active	M. Africanum, West African 2
mazF1 16	2.19089145361147	active	Indo-Oceanic
mazF1 16	2.27190830376349	active	Indo-Oceanic
mazF1 16	2.17019838941345	active	M. Africanum, West African 1
mazF1 16	2.03497760032119	active	M. Africanum, West African 1
mazF1 16	0	inactive	Euro-American
mazF1 16	0	inactive	Euro-American
mazF1 16	2.36616519974084	active	East-Asian
mazF1 16	2.10021136405266	active	Euro-American
mazF1 16	0	inactive	East-African-Indian
mazF1 16	0	inactive	Euro-American
mazF1 16	2.46111989983636	active	Indo-Oceanic
mazF1 16	0	inactive	Euro-American
mazF1 16	0.010861582085414	inactive	Euro-American
mazF1 16	0	inactive	Euro-American
mazF1 16	0.173786785180429	inactive	Euro-American
mazF1 16	2.40281046631041	active	Euro-American
mazF1 16	0	inactive	Euro-American
mazF1 16	1.699852111427	active	Lineage 7
mazF1 16	2.20910683353825	active	Indo-Oceanic
mazF1 16	2.00283993955894	active	Indo-Oceanic
mazF1 16	2.22731655011351	active	Indo-Oceanic
mazF1 16	2.46111989983636	active	East-Asian
mazF1 16	1.66362577156939	active	Indo-Oceanic
mazF1 16	2.2017445342871	active	East-Asian
mazF1 16	2.00609132849294	active	Indo-Oceanic
mazF1 16	1.7994471489868	active	Indo-Oceanic
mazF1 16	2.15007195888603	active	Indo-Oceanic
mazF1 16	2.46111989983636	active	Indo-Oceanic
mazF1 16	1.88003048113543	active	Indo-Oceanic
mazF1 16	2.15352925098855	active	Indo-Oceanic
mazF1 16	2.11783693538806	active	East-Asian
mazF1 16	2.03290654422253	active	Euro-American
vapB28 11	2.14737528123236	active	East-Asian
vapB28 11	1.57783629658431	active	East-Asian
vapB28 11	0	inactive	East-Asian
vapB28 11	1.69628523292532	active	East-Asian
vapB28 11	0	inactive	East-African-Indian
vapB28 11	2.05731682923725	active	East-Asian
vapB28 11	2.46111989983636	active	Indo-Oceanic
vapB28 11	2.3484817717676	active	East-Asian
vapB28 11	2.09350645616502	active	Euro-American
vapB28 11	1.14645095239825	active	East-Asian
vapB28 11	0	inactive	Euro-American
vapB28 11	1.79698455965074	active	East-Asian
vapB28 11	0.0556787592183621	inactive	East-African-Indian
vapB28 11	2.20281902291111	active	East-Asian
vapB28 11	2.19974765988625	active	East-Asian
vapB28 11	2.31860966878768	active	Indo-Oceanic
vapB28 11	2.11101014230478	active	East-Asian
vapB28 11	2.02317710895672	active	East-Asian
vapB28 11	0.350326783072057	active	East-Asian
vapB28 11	0.795258118829344	active	East-Asian
vapB28 11	1.51053726093178	active	East-Asian
vapB28 11	2.2857684152064	active	East-Asian
vapB28 11	0	inactive	East-African-Indian
vapB28 11	0	active	East-Asian
vapB28 11	2.1731847985065	active	East-Asian
vapB28 11	2.42874614203289	active	East-Asian
vapB28 11	2.08067372440479	active	East-Asian
vapB28 11	2.15525873622218	active	East-Asian
vapB28 11	2.1977596954327	active	East-Asian
vapB28 11	2.30184256268875	active	East-Asian
vapB28 11	2.40532931430761	active	East-Asian
vapB28 11	0	inactive	Euro-American
vapB28 11	1.91426771485825	active	East-Asian
vapB28 11	2.1696447904632	active	Euro-American
vapB28 11	2.00868432914432	active	Euro-American
vapB28 11	1.66754112134582	active	Euro-American
vapB28 11	2.19282815008278	active	Euro-American
vapB28 11	2.02722319869471	active	Euro-American
vapB28 11	2.28982450414302	active	East-Asian
vapB28 11	2.14141705605656	active	East-Asian
vapB28 11	2.27223411922855	active	Euro-American
vapB28 11	1.76983296743306	active	Euro-American
vapB28 11	2.17197952076707	active	East-Asian
vapB28 11	1.89893481253745	active	Euro-American
vapB28 11	2.03873445007027	active	East-Asian
vapB28 11	2.46111989983636	active	Euro-American
vapB28 11	0.490916452295547	inactive	Euro-American
vapB28 11	2.03696764546094	active	Indo-Oceanic
vapB28 11	1.93798193834249	active	Indo-Oceanic
vapB28 11	2.2621462869854	active	Indo-Oceanic
vapB28 11	0	inactive	Euro-American
vapB28 11	1.72101202613157	active	Euro-American
vapB28 11	0.0343357185935195	inactive	Euro-American
vapB28 11	0.0261031619222747	inactive	Euro-American
vapB28 11	1.59672279777352	active	East-Asian
vapB28 11	0	inactive	Euro-American
vapB28 11	2.05972839674371	active	East-Asian
vapB28 11	2.08048131307795	active	Euro-American
vapB28 11	2.05923279775169	active	East-Asian
vapB28 11	0	inactive	East-African-Indian
vapB28 11	0	moderately active	M. Africanum, West African 2
vapB28 11	2.3846952917893	active	Indo-Oceanic
vapB28 11	1.87940808318906	active	Indo-Oceanic
vapB28 11	2.34376977621887	active	M. Africanum, West African 1
vapB28 11	2.10799924102059	active	M. Africanum, West African 1
vapB28 11	0	inactive	Euro-American
vapB28 11	0.0869444508450366	inactive	Euro-American
vapB28 11	1.36219004852043	active	East-Asian
vapB28 11	2.10504914836373	active	Euro-American
vapB28 11	0	inactive	East-African-Indian
vapB28 11	0	inactive	Euro-American
vapB28 11	2.18723888063272	active	Indo-Oceanic
vapB28 11	0	inactive	Euro-American
vapB28 11	0	inactive	Euro-American
vapB28 11	0	inactive	Euro-American
vapB28 11	0	inactive	Euro-American
vapB28 11	2.4255689445311	active	Euro-American
vapB28 11	0	inactive	Euro-American
vapB28 11	1.33063707499747	active	Lineage 7
vapB28 11	2.46111989983636	active	Indo-Oceanic
vapB28 11	1.91865098297794	active	Indo-Oceanic
vapB28 11	2.12221948763598	active	Indo-Oceanic
vapB28 11	2.33799754377308	active	East-Asian
vapB28 11	1.99928228106826	active	Indo-Oceanic
vapB28 11	2.01278634068218	active	East-Asian
vapB28 11	1.78516655228905	active	Indo-Oceanic
vapB28 11	2.25598835638924	active	Indo-Oceanic
vapB28 11	2.39209318697141	active	Indo-Oceanic
vapB28 11	2.15964997163215	active	Indo-Oceanic
vapB28 11	2.02506019158705	active	Indo-Oceanic
vapB28 11	1.90734574615499	active	Indo-Oceanic
vapB28 11	1.59839540628626	active	East-Asian
vapB28 11	1.15128598559623	active	Euro-American
vapB28 12	2.46111989983636	active	East-Asian
vapB28 12	2.39702443756274	active	East-Asian
vapB28 12	0.190464584829119	inactive	East-Asian
vapB28 12	2.46111989983636	active	East-Asian
vapB28 12	0.665979111360416	inactive	East-African-Indian
vapB28 12	2.30578716110678	active	East-Asian
vapB28 12	2.41613173612609	active	Indo-Oceanic
vapB28 12	2.28862500187661	active	East-Asian
vapB28 12	2.46111989983636	active	Euro-American
vapB28 12	0.997822585733854	active	East-Asian
vapB28 12	0	inactive	Euro-American
vapB28 12	2.46111989983636	active	East-Asian
vapB28 12	0.116299192991399	inactive	East-African-Indian
vapB28 12	2.21771789929045	active	East-Asian
vapB28 12	2.20947126366248	active	East-Asian
vapB28 12	2.46111989983636	active	Indo-Oceanic
vapB28 12	2.46111989983636	active	East-Asian
vapB28 12	2.22308412882577	active	East-Asian
vapB28 12	0.656094787948399	active	East-Asian
vapB28 12	0.654326264308838	active	East-Asian
vapB28 12	1.92423134355625	active	East-Asian
vapB28 12	2.34524196561862	active	East-Asian
vapB28 12	0.0199762703999138	inactive	East-African-Indian
vapB28 12	0	active	East-Asian
vapB28 12	2.16162141001307	active	East-Asian
vapB28 12	2.43699698017827	active	East-Asian
vapB28 12	2.46111989983636	active	East-Asian
vapB28 12	2.09900013307426	active	East-Asian
vapB28 12	2.46111989983636	active	East-Asian
vapB28 12	2.46111989983636	active	East-Asian
vapB28 12	2.1645494231364	active	East-Asian
vapB28 12	0	inactive	Euro-American
vapB28 12	2.46111989983636	active	East-Asian
vapB28 12	1.63890880151845	active	Euro-American
vapB28 12	2.10011408839203	active	Euro-American
vapB28 12	2.03339378471983	active	Euro-American
vapB28 12	2.40056833651135	active	Euro-American
vapB28 12	1.86833428962939	active	Euro-American
vapB28 12	2.46111989983636	active	East-Asian
vapB28 12	2.46111989983636	active	East-Asian
vapB28 12	2.2245216015902	active	Euro-American
vapB28 12	2.31026102382645	active	Euro-American
vapB28 12	1.86942736656513	active	East-Asian
vapB28 12	2.05801902698619	active	Euro-American
vapB28 12	2.45733592112426	active	East-Asian
vapB28 12	2.38645538317699	active	Euro-American
vapB28 12	0.0182084052325758	inactive	Euro-American
vapB28 12	2.46111989983636	active	Indo-Oceanic
vapB28 12	2.46111989983636	active	Indo-Oceanic
vapB28 12	2.46111989983636	active	Indo-Oceanic
vapB28 12	0	inactive	Euro-American
vapB28 12	2.2454158259611	active	Euro-American
vapB28 12	0.195974108850871	inactive	Euro-American
vapB28 12	0.173083188723157	inactive	Euro-American
vapB28 12	1.93107460810897	active	East-Asian
vapB28 12	0.600090495920679	inactive	Euro-American
vapB28 12	2.21110135476014	active	East-Asian
vapB28 12	2.01524149060677	active	Euro-American
vapB28 12	2.340685203461	active	East-Asian
vapB28 12	0	inactive	East-African-Indian
vapB28 12	0.153501496525673	moderately active	M. Africanum, West African 2
vapB28 12	2.31577817762453	active	Indo-Oceanic
vapB28 12	2.17920828240519	active	Indo-Oceanic
vapB28 12	2.46111989983636	active	M. Africanum, West African 1
vapB28 12	2.06514735814748	active	M. Africanum, West African 1
vapB28 12	0.243810368168014	inactive	Euro-American
vapB28 12	0	inactive	Euro-American
vapB28 12	2.24218011769868	active	East-Asian
vapB28 12	1.54725491796369	active	Euro-American
vapB28 12	0.375126425081195	inactive	East-African-Indian
vapB28 12	0.180899282324909	inactive	Euro-American
vapB28 12	2.45741090707207	active	Indo-Oceanic
vapB28 12	0.215151887900503	inactive	Euro-American
vapB28 12	0.372445877324567	inactive	Euro-American
vapB28 12	0	inactive	Euro-American
vapB28 12	0.0945704543109329	inactive	Euro-American
vapB28 12	2.46111989983636	active	Euro-American
vapB28 12	0.125655495196745	inactive	Euro-American
vapB28 12	1.46872244793492	active	Lineage 7
vapB28 12	2.4298125669444	active	Indo-Oceanic
vapB28 12	1.78855376630584	active	Indo-Oceanic
vapB28 12	1.86978374239561	active	Indo-Oceanic
vapB28 12	2.35475310102918	active	East-Asian
vapB28 12	2.46111989983636	active	Indo-Oceanic
vapB28 12	1.88437869784276	active	East-Asian
vapB28 12	2.17789138944483	active	Indo-Oceanic
vapB28 12	2.18418213452321	active	Indo-Oceanic
vapB28 12	2.26189601113586	active	Indo-Oceanic
vapB28 12	2.14421641897995	active	Indo-Oceanic
vapB28 12	2.43032396508854	active	Indo-Oceanic
vapB28 12	1.88417415578541	active	Indo-Oceanic
vapB28 12	1.86440419349918	active	East-Asian
vapB28 12	1.7267183976253	active	Euro-American
purB 12	2.02915290029446	active	East-Asian
purB 12	2.40022170802613	active	East-Asian
purB 12	0.179049795286792	inactive	East-Asian
purB 12	2.46111989983636	active	East-Asian
purB 12	0	inactive	East-African-Indian
purB 12	2.23263508944978	active	East-Asian
purB 12	2.34685587321647	active	Indo-Oceanic
purB 12	2.34934799517453	active	East-Asian
purB 12	2.37509346601581	active	Euro-American
purB 12	2.46111989983636	active	East-Asian
purB 12	0.0810365594659711	inactive	Euro-American
purB 12	2.46111989983636	active	East-Asian
purB 12	0.0133079608042652	inactive	East-African-Indian
purB 12	2.31762408049418	active	East-Asian
purB 12	2.46111989983636	active	East-Asian
purB 12	2.46111989983636	active	Indo-Oceanic
purB 12	2.45538505011704	active	East-Asian
purB 12	2.44755127614303	active	East-Asian
purB 12	2.46111989983636	active	East-Asian
purB 12	2.46111989983636	active	East-Asian
purB 12	2.46111989983636	active	East-Asian
purB 12	2.46111989983636	active	East-Asian
purB 12	0	inactive	East-African-Indian
purB 12	0	active	East-Asian
purB 12	2.13647651231404	active	East-Asian
purB 12	2.46111989983636	active	East-Asian
purB 12	2.20669089453265	active	East-Asian
purB 12	2.30587330395115	active	East-Asian
purB 12	2.30624550359008	active	East-Asian
purB 12	2.46111989983636	active	East-Asian
purB 12	2.31793620721108	active	East-Asian
purB 12	2.19837137824048	active	East-Asian
purB 12	2.46111989983636	active	Euro-American
purB 12	2.46111989983636	active	Euro-American
purB 12	2.46111989983636	active	Euro-American
purB 12	2.45674648060842	active	Euro-American
purB 12	2.33932602653606	active	Euro-American
purB 12	2.42251918748127	active	East-Asian
purB 12	2.46111989983636	active	East-Asian
purB 12	2.1024264434514	active	Euro-American
purB 12	2.46111989983636	active	Euro-American
purB 12	2.39027143235805	active	East-Asian
purB 12	2.46111989983636	active	Euro-American
purB 12	2.46111989983636	active	East-Asian
purB 12	2.46111989983636	active	Euro-American
purB 12	0	inactive	Euro-American
purB 12	2.40849337752388	active	Indo-Oceanic
purB 12	2.46111989983636	active	Indo-Oceanic
purB 12	1.89043746468843	active	Indo-Oceanic
purB 12	0.557938871344084	inactive	Euro-American
purB 12	2.06945000337348	active	Euro-American
purB 12	0	inactive	Euro-American
purB 12	0.472319960088303	inactive	Euro-American
purB 12	2.46111989983636	active	East-Asian
purB 12	0	inactive	Euro-American
purB 12	2.46111989983636	active	East-Asian
purB 12	2.40359402974777	active	Euro-American
purB 12	2.41512756221231	active	East-Asian
purB 12	0	inactive	East-African-Indian
purB 12	2.00816213336163	moderately active	M. Africanum, West African 2
purB 12	2.46111989983636	active	Indo-Oceanic
purB 12	2.43515633602705	active	Indo-Oceanic
purB 12	2.46111989983636	active	M. Africanum, West African 1
purB 12	2.46111989983636	active	M. Africanum, West African 1
purB 12	0	inactive	Euro-American
purB 12	0.219838721342382	inactive	Euro-American
purB 12	2.46111989983636	active	East-Asian
purB 12	2.46111989983636	active	Euro-American
purB 12	0.184958360923429	inactive	East-African-Indian
purB 12	0	inactive	Euro-American
purB 12	2.46111989983636	active	Indo-Oceanic
purB 12	0.26623848406417	inactive	Euro-American
purB 12	0.173786785180429	inactive	Euro-American
purB 12	2.46111989983636	active	Euro-American
purB 12	0	inactive	Euro-American
purB 12	2.340496737773	active	Lineage 7
purB 12	2.46111989983636	active	Indo-Oceanic
purB 12	2.40368899595882	active	Indo-Oceanic
purB 12	2.46111989983636	active	Indo-Oceanic
purB 12	2.24312425187631	active	East-Asian
purB 12	2.46111989983636	active	Indo-Oceanic
purB 12	2.46111989983636	active	East-Asian
purB 12	2.32934037116758	active	Indo-Oceanic
purB 12	2.46111989983636	active	Indo-Oceanic
purB 12	2.46111989983636	active	Indo-Oceanic
purB 12	2.30375989098568	active	Indo-Oceanic
purB 12	2.46111989983636	active	Indo-Oceanic
purB 12	2.0001385644437	active	Indo-Oceanic
purB 12	2.46111989983636	active	East-Asian
purB 12	2.46111989983636	active	Euro-American
purB 5	2.46111989983636	active	East-Asian
purB 5	2.4431281724674	active	East-Asian
purB 5	0.00178444266148521	inactive	East-Asian
purB 5	2.46111989983636	active	East-Asian
purB 5	0	inactive	East-African-Indian
purB 5	2.46111989983636	active	East-Asian
purB 5	2.46111989983636	active	Indo-Oceanic
purB 5	1.8308106912822	active	East-Asian
purB 5	2.36122929012048	active	Euro-American
purB 5	2.46111989983636	active	East-Asian
purB 5	0	inactive	Euro-American
purB 5	2.4089507234691	active	East-Asian
purB 5	0	inactive	East-African-Indian
purB 5	2.40727170748169	active	East-Asian
purB 5	2.46111989983636	active	East-Asian
purB 5	2.46111989983636	active	Indo-Oceanic
purB 5	2.37010686957701	active	East-Asian
purB 5	2.43338394421644	active	East-Asian
purB 5	2.46111989983636	active	East-Asian
purB 5	2.08860985253233	active	East-Asian
purB 5	2.43302702176816	active	East-Asian
purB 5	2.46111989983636	active	East-Asian
purB 5	0	inactive	East-African-Indian
purB 5	0	active	East-Asian
purB 5	2.46111989983636	active	East-Asian
purB 5	2.27362563256201	active	East-Asian
purB 5	2.46111989983636	active	East-Asian
purB 5	2.46111989983636	active	East-Asian
purB 5	2.46111989983636	active	East-Asian
purB 5	2.07377508024988	active	East-Asian
purB 5	2.43158849865131	active	East-Asian
purB 5	2.46111989983636	active	East-Asian
purB 5	2.37097559627181	active	Euro-American
purB 5	2.28350110187098	active	Euro-American
purB 5	2.44213308932474	active	Euro-American
purB 5	2.36084480152524	active	Euro-American
purB 5	2.16254838208151	active	Euro-American
purB 5	2.35072548897013	active	East-Asian
purB 5	2.46111989983636	active	East-Asian
purB 5	2.46111989983636	active	Euro-American
purB 5	2.46111989983636	active	Euro-American
purB 5	2.45347308042903	active	East-Asian
purB 5	2.46111989983636	active	Euro-American
purB 5	2.46111989983636	active	East-Asian
purB 5	2.46111989983636	active	Euro-American
purB 5	0	inactive	Euro-American
purB 5	2.24156448383334	active	Indo-Oceanic
purB 5	2.46111989983636	active	Indo-Oceanic
purB 5	2.46111989983636	active	Indo-Oceanic
purB 5	0	inactive	Euro-American
purB 5	2.46111989983636	active	Euro-American
purB 5	0	inactive	Euro-American
purB 5	0	inactive	Euro-American
purB 5	2.46111989983636	active	East-Asian
purB 5	0	inactive	Euro-American
purB 5	2.31151914086736	active	East-Asian
purB 5	2.46111989983636	active	Euro-American
purB 5	2.46111989983636	active	East-Asian
purB 5	0.0808369157186453	inactive	East-African-Indian
purB 5	2.46111989983636	moderately active	M. Africanum, West African 2
purB 5	2.46111989983636	active	Indo-Oceanic
purB 5	2.46111989983636	active	Indo-Oceanic
purB 5	2.46111989983636	active	M. Africanum, West African 1
purB 5	2.46111989983636	active	M. Africanum, West African 1
purB 5	0	inactive	Euro-American
purB 5	0	inactive	Euro-American
purB 5	2.46111989983636	active	East-Asian
purB 5	2.46111989983636	active	Euro-American
purB 5	0	inactive	East-African-Indian
purB 5	0.273192451876575	inactive	Euro-American
purB 5	2.46111989983636	active	Indo-Oceanic
purB 5	0	inactive	Euro-American
purB 5	0.25981309324199	inactive	Euro-American
purB 5	2.46111989983636	active	Euro-American
purB 5	0.198208521830305	inactive	Euro-American
purB 5	2.46111989983636	active	Lineage 7
purB 5	2.46111989983636	active	Indo-Oceanic
purB 5	2.15414608772463	active	Indo-Oceanic
purB 5	2.42933763848316	active	Indo-Oceanic
purB 5	2.46111989983636	active	East-Asian
purB 5	2.4479885089522	active	Indo-Oceanic
purB 5	2.34701955564122	active	East-Asian
purB 5	2.40395698124708	active	Indo-Oceanic
purB 5	2.46111989983636	active	Indo-Oceanic
purB 5	2.46111989983636	active	Indo-Oceanic
purB 5	2.46111989983636	active	Indo-Oceanic
purB 5	2.46111989983636	active	Indo-Oceanic
purB 5	2.34605114274286	active	Indo-Oceanic
purB 5	2.20349555257849	active	East-Asian
purB 5	2.22145439701206	active	Euro-American
mshD 13	2.44519242931838	active	East-Asian
mshD 13	2.30790567901497	active	East-Asian
mshD 13	0	inactive	East-Asian
mshD 13	2.43893980185765	active	East-Asian
mshD 13	0.401371428335933	inactive	East-African-Indian
mshD 13	2.46111989983636	active	East-Asian
mshD 13	2.46111989983636	active	Indo-Oceanic
mshD 13	2.46111989983636	active	East-Asian
mshD 13	2.46111989983636	active	Euro-American
mshD 13	2.46111989983636	active	East-Asian
mshD 13	0.21596613955208	inactive	Euro-American
mshD 13	2.46111989983636	active	East-Asian
mshD 13	0.0368386767822645	inactive	East-African-Indian
mshD 13	2.46111989983636	active	East-Asian
mshD 13	2.46111989983636	active	East-Asian
mshD 13	2.46111989983636	active	Indo-Oceanic
mshD 13	2.46111989983636	active	East-Asian
mshD 13	2.46111989983636	active	East-Asian
mshD 13	2.46111989983636	active	East-Asian
mshD 13	2.46111989983636	active	East-Asian
mshD 13	2.46111989983636	active	East-Asian
mshD 13	2.46111989983636	active	East-Asian
mshD 13	0	active	East-Asian
mshD 13	2.46111989983636	active	East-Asian
mshD 13	2.07783511178305	active	East-Asian
mshD 13	2.46111989983636	active	East-Asian
mshD 13	2.46111989983636	active	East-Asian
mshD 13	2.46111989983636	active	East-Asian
mshD 13	2.46111989983636	active	East-Asian
mshD 13	2.46111989983636	active	East-Asian
mshD 13	0	inactive	Euro-American
mshD 13	2.41648886911836	active	East-Asian
mshD 13	2.46111989983636	active	Euro-American
mshD 13	2.46111989983636	active	Euro-American
mshD 13	2.46111989983636	active	Euro-American
mshD 13	2.46111989983636	active	Euro-American
mshD 13	2.46111989983636	active	Euro-American
mshD 13	2.46111989983636	active	East-Asian
mshD 13	2.46111989983636	active	East-Asian
mshD 13	2.46111989983636	active	Euro-American
mshD 13	2.46111989983636	active	Euro-American
mshD 13	2.46111989983636	active	East-Asian
mshD 13	2.46111989983636	active	Euro-American
mshD 13	2.46111989983636	active	East-Asian
mshD 13	2.46111989983636	active	Euro-American
mshD 13	0.0824716303271323	inactive	Euro-American
mshD 13	2.46111989983636	active	Indo-Oceanic
mshD 13	2.46111989983636	active	Indo-Oceanic
mshD 13	2.46111989983636	active	Indo-Oceanic
mshD 13	0	inactive	Euro-American
mshD 13	2.46111989983636	active	Euro-American
mshD 13	0	inactive	Euro-American
mshD 13	0.141690580239097	inactive	Euro-American
mshD 13	2.46111989983636	active	East-Asian
mshD 13	0.29078405235515	inactive	Euro-American
mshD 13	2.46111989983636	active	East-Asian
mshD 13	2.46111989983636	active	Euro-American
mshD 13	2.46111989983636	active	East-Asian
mshD 13	0	inactive	East-African-Indian
mshD 13	2.46111989983636	moderately active	M. Africanum, West African 2
mshD 13	2.46111989983636	active	Indo-Oceanic
mshD 13	2.46111989983636	active	Indo-Oceanic
mshD 13	2.46111989983636	active	M. Africanum, West African 1
mshD 13	2.46111989983636	active	M. Africanum, West African 1
mshD 13	0	inactive	Euro-American
mshD 13	0	inactive	Euro-American
mshD 13	2.46111989983636	active	East-Asian
mshD 13	2.46111989983636	active	Euro-American
mshD 13	0.0809846391090244	inactive	East-African-Indian
mshD 13	0.131764559733669	inactive	Euro-American
mshD 13	2.46111989983636	active	Indo-Oceanic
mshD 13	0.0101604896075095	inactive	Euro-American
mshD 13	0	inactive	Euro-American
mshD 13	0.202966914510111	inactive	Euro-American
mshD 13	0	inactive	Euro-American
mshD 13	2.46111989983636	active	Euro-American
mshD 13	0	inactive	Euro-American
mshD 13	2.46111989983636	active	Lineage 7
mshD 13	2.46111989983636	active	Indo-Oceanic
mshD 13	2.46111989983636	active	Indo-Oceanic
mshD 13	2.46111989983636	active	Indo-Oceanic
mshD 13	2.46111989983636	active	East-Asian
mshD 13	2.46111989983636	active	Indo-Oceanic
mshD 13	2.46111989983636	active	East-Asian
mshD 13	2.46111989983636	active	Indo-Oceanic
mshD 13	2.46111989983636	active	Indo-Oceanic
mshD 13	2.46111989983636	active	Indo-Oceanic
mshD 13	2.46111989983636	active	Indo-Oceanic
mshD 13	2.46111989983636	active	Indo-Oceanic
mshD 13	2.46111989983636	active	Indo-Oceanic
mshD 13	2.46111989983636	active	East-Asian
mshD 13	2.46111989983636	active	Euro-American
mshD 6	2.46111989983636	active	East-Asian
mshD 6	2.46111989983636	active	East-Asian
mshD 6	0	inactive	East-Asian
mshD 6	2.46111989983636	active	East-Asian
mshD 6	0	inactive	East-African-Indian
mshD 6	2.46111989983636	active	East-Asian
mshD 6	2.46111989983636	active	Indo-Oceanic
mshD 6	2.46111989983636	active	East-Asian
mshD 6	2.46111989983636	active	Euro-American
mshD 6	2.46111989983636	active	East-Asian
mshD 6	0	inactive	Euro-American
mshD 6	2.46111989983636	active	East-Asian
mshD 6	0	inactive	East-African-Indian
mshD 6	2.46111989983636	active	East-Asian
mshD 6	2.46111989983636	active	East-Asian
mshD 6	2.46111989983636	active	Indo-Oceanic
mshD 6	2.46111989983636	active	East-Asian
mshD 6	2.46111989983636	active	East-Asian
mshD 6	2.46111989983636	active	East-Asian
mshD 6	2.46111989983636	active	East-Asian
mshD 6	2.29234612927846	active	East-Asian
mshD 6	2.46111989983636	active	East-Asian
mshD 6	0	active	East-Asian
mshD 6	2.45422893123021	active	East-Asian
mshD 6	2.46111989983636	active	East-Asian
mshD 6	2.46111989983636	active	East-Asian
mshD 6	2.46111989983636	active	East-Asian
mshD 6	2.46111989983636	active	East-Asian
mshD 6	2.46111989983636	active	East-Asian
mshD 6	2.46111989983636	active	East-Asian
mshD 6	0.374121945602351	inactive	Euro-American
mshD 6	2.46111989983636	active	East-Asian
mshD 6	2.46111989983636	active	Euro-American
mshD 6	2.46111989983636	active	Euro-American
mshD 6	2.46111989983636	active	Euro-American
mshD 6	2.42548226709157	active	Euro-American
mshD 6	2.46111989983636	active	Euro-American
mshD 6	2.46111989983636	active	East-Asian
mshD 6	2.46111989983636	active	East-Asian
mshD 6	2.46111989983636	active	Euro-American
mshD 6	2.46111989983636	active	Euro-American
mshD 6	2.46111989983636	active	East-Asian
mshD 6	2.46111989983636	active	Euro-American
mshD 6	2.46111989983636	active	East-Asian
mshD 6	1.68594063213817	active	Euro-American
mshD 6	0	inactive	Euro-American
mshD 6	2.46111989983636	active	Indo-Oceanic
mshD 6	2.46111989983636	active	Indo-Oceanic
mshD 6	2.46111989983636	active	Indo-Oceanic
mshD 6	0	inactive	Euro-American
mshD 6	2.46111989983636	active	Euro-American
mshD 6	0	inactive	Euro-American
mshD 6	0.104181075446595	inactive	Euro-American
mshD 6	2.46111989983636	active	East-Asian
mshD 6	0.253341768142616	inactive	Euro-American
mshD 6	2.46111989983636	active	East-Asian
mshD 6	2.46111989983636	active	Euro-American
mshD 6	2.46111989983636	active	East-Asian
mshD 6	0	inactive	East-African-Indian
mshD 6	2.46111989983636	moderately active	M. Africanum, West African 2
mshD 6	2.46111989983636	active	Indo-Oceanic
mshD 6	2.46111989983636	active	Indo-Oceanic
mshD 6	2.46111989983636	active	M. Africanum, West African 1
mshD 6	2.46111989983636	active	M. Africanum, West African 1
mshD 6	0.310813223486972	inactive	Euro-American
mshD 6	0.408309981856724	inactive	Euro-American
mshD 6	2.46111989983636	active	East-Asian
mshD 6	2.46111989983636	active	Euro-American
mshD 6	0.167696272302355	inactive	East-African-Indian
mshD 6	0	inactive	Euro-American
mshD 6	2.46111989983636	active	Indo-Oceanic
mshD 6	0	inactive	Euro-American
mshD 6	0.0801242445225278	inactive	Euro-American
mshD 6	0	inactive	Euro-American
mshD 6	0	inactive	Euro-American
mshD 6	2.46111989983636	active	Euro-American
mshD 6	0.102038390336517	inactive	Euro-American
mshD 6	2.46111989983636	active	Lineage 7
mshD 6	2.46111989983636	active	Indo-Oceanic
mshD 6	2.46111989983636	active	Indo-Oceanic
mshD 6	2.46111989983636	active	Indo-Oceanic
mshD 6	2.46111989983636	active	East-Asian
mshD 6	2.38749398510076	active	Indo-Oceanic
mshD 6	2.46111989983636	active	East-Asian
mshD 6	2.46111989983636	active	Indo-Oceanic
mshD 6	2.46111989983636	active	Indo-Oceanic
mshD 6	2.46111989983636	active	Indo-Oceanic
mshD 6	2.46111989983636	active	Indo-Oceanic
mshD 6	2.46111989983636	active	Indo-Oceanic
mshD 6	2.46111989983636	active	Indo-Oceanic
mshD 6	2.46111989983636	active	East-Asian
mshD 6	2.46111989983636	active	Euro-American
Rv0826 13	2.39119638210958	active	East-Asian
Rv0826 13	2.24657242077928	active	East-Asian
Rv0826 13	0	inactive	East-Asian
Rv0826 13	2.46111989983636	active	East-Asian
Rv0826 13	0.403730701209855	inactive	East-African-Indian
Rv0826 13	2.46111989983636	active	East-Asian
Rv0826 13	2.46111989983636	active	Indo-Oceanic
Rv0826 13	2.23963234707706	active	East-Asian
Rv0826 13	2.46111989983636	active	Euro-American
Rv0826 13	2.41706742261369	active	East-Asian
Rv0826 13	0	inactive	Euro-American
Rv0826 13	2.46111989983636	active	East-Asian
Rv0826 13	0.0192267179915389	inactive	East-African-Indian
Rv0826 13	2.46111989983636	active	East-Asian
Rv0826 13	2.46111989983636	active	East-Asian
Rv0826 13	2.2868599777042	active	East-Asian
Rv0826 13	2.41030933621262	active	East-Asian
Rv0826 13	2.46111989983636	active	East-Asian
Rv0826 13	2.46111989983636	active	East-Asian
Rv0826 13	2.3737318197716	active	East-Asian
Rv0826 13	2.46111989983636	active	East-Asian
Rv0826 13	0	inactive	East-African-Indian
Rv0826 13	0	active	East-Asian
Rv0826 13	2.46111989983636	active	East-Asian
Rv0826 13	2.46111989983636	active	East-Asian
Rv0826 13	2.16463474658209	active	East-Asian
Rv0826 13	2.46111989983636	active	East-Asian
Rv0826 13	2.45170982688993	active	East-Asian
Rv0826 13	2.46111989983636	active	East-Asian
Rv0826 13	2.46111989983636	active	East-Asian
Rv0826 13	0.153143238284847	inactive	Euro-American
Rv0826 13	2.18663148039439	active	East-Asian
Rv0826 13	2.4239686838857	active	Euro-American
Rv0826 13	2.46111989983636	active	Euro-American
Rv0826 13	2.46111989983636	active	Euro-American
Rv0826 13	2.23617220071095	active	Euro-American
Rv0826 13	2.46111989983636	active	Euro-American
Rv0826 13	2.32249794638953	active	East-Asian
Rv0826 13	2.46111989983636	active	East-Asian
Rv0826 13	2.46111989983636	active	Euro-American
Rv0826 13	2.32316975752411	active	Euro-American
Rv0826 13	2.33246095474328	active	East-Asian
Rv0826 13	2.46111989983636	active	Euro-American
Rv0826 13	2.46111989983636	active	East-Asian
Rv0826 13	2.19136436787412	active	Euro-American
Rv0826 13	0.622400377433785	inactive	Euro-American
Rv0826 13	2.46111989983636	active	Indo-Oceanic
Rv0826 13	2.27588688577962	active	Indo-Oceanic
Rv0826 13	2.27440588937662	active	Indo-Oceanic
Rv0826 13	0	inactive	Euro-American
Rv0826 13	2.40951836945085	active	Euro-American
Rv0826 13	0.40366548084089	inactive	Euro-American
Rv0826 13	0.150917532920689	inactive	Euro-American
Rv0826 13	0.0845227039264729	inactive	Euro-American
Rv0826 13	2.46111989983636	active	East-Asian
Rv0826 13	2.36032266080131	active	Euro-American
Rv0826 13	2.46111989983636	active	East-Asian
Rv0826 13	0.158982687244478	inactive	East-African-Indian
Rv0826 13	2.46111989983636	moderately active	M. Africanum, West African 2
Rv0826 13	2.46111989983636	active	Indo-Oceanic
Rv0826 13	2.19348329064902	active	Indo-Oceanic
Rv0826 13	2.46111989983636	active	M. Africanum, West African 1
Rv0826 13	2.46111989983636	active	M. Africanum, West African 1
Rv0826 13	0.0996782670967298	inactive	Euro-American
Rv0826 13	0.287477438217745	inactive	Euro-American
Rv0826 13	2.44425725061202	active	East-Asian
Rv0826 13	2.46111989983636	active	Euro-American
Rv0826 13	0.10908085406475	inactive	East-African-Indian
Rv0826 13	0.208059740126344	inactive	Euro-American
Rv0826 13	2.3830463270084	active	Indo-Oceanic
Rv0826 13	0	inactive	Euro-American
Rv0826 13	0.419318206722513	inactive	Euro-American
Rv0826 13	0.332966205581867	inactive	Euro-American
Rv0826 13	2.33028952064967	active	Euro-American
Rv0826 13	0.373220349318421	inactive	Euro-American
Rv0826 13	2.46111989983636	active	Lineage 7
Rv0826 13	2.46111989983636	active	Indo-Oceanic
Rv0826 13	2.46111989983636	active	Indo-Oceanic
Rv0826 13	2.46111989983636	active	Indo-Oceanic
Rv0826 13	2.46111989983636	active	East-Asian
Rv0826 13	2.46111989983636	active	Indo-Oceanic
Rv0826 13	2.46111989983636	active	Indo-Oceanic
Rv0826 13	2.46111989983636	active	Indo-Oceanic
Rv0826 13	2.05862507733681	active	Indo-Oceanic
Rv0826 13	2.46111989983636	active	Indo-Oceanic
Rv0826 13	1.99777700763485	active	East-Asian
Rv0826 13	2.46111989983636	active	Euro-American
Rv0826 6	2.28744099398156	active	East-Asian
Rv0826 6	2.46111989983636	active	East-Asian
Rv0826 6	0	inactive	East-Asian
Rv0826 6	2.46111989983636	active	East-Asian
Rv0826 6	0	inactive	East-African-Indian
Rv0826 6	2.46111989983636	active	East-Asian
Rv0826 6	2.46111989983636	active	Indo-Oceanic
Rv0826 6	2.26372415358797	active	East-Asian
Rv0826 6	2.46111989983636	active	Euro-American
Rv0826 6	2.46111989983636	active	East-Asian
Rv0826 6	0.261608805107792	inactive	Euro-American
Rv0826 6	2.46111989983636	active	East-Asian
Rv0826 6	0.0339182404795513	inactive	East-African-Indian
Rv0826 6	2.46111989983636	active	East-Asian
Rv0826 6	2.46111989983636	active	East-Asian
Rv0826 6	2.46111989983636	active	East-Asian
Rv0826 6	2.46111989983636	active	East-Asian
Rv0826 6	2.46111989983636	active	East-Asian
Rv0826 6	2.46111989983636	active	East-Asian
Rv0826 6	2.46111989983636	active	East-Asian
Rv0826 6	2.46111989983636	active	East-Asian
Rv0826 6	0	inactive	East-African-Indian
Rv0826 6	0	active	East-Asian
Rv0826 6	2.46111989983636	active	East-Asian
Rv0826 6	2.46094813662504	active	East-Asian
Rv0826 6	2.34401207947407	active	East-Asian
Rv0826 6	2.46111989983636	active	East-Asian
Rv0826 6	2.46111989983636	active	East-Asian
Rv0826 6	2.46111989983636	active	East-Asian
Rv0826 6	2.46111989983636	active	East-Asian
Rv0826 6	0.21672054823147	inactive	Euro-American
Rv0826 6	2.46111989983636	active	East-Asian
Rv0826 6	2.46111989983636	active	Euro-American
Rv0826 6	2.46111989983636	active	Euro-American
Rv0826 6	2.44733791900441	active	Euro-American
Rv0826 6	2.46111989983636	active	Euro-American
Rv0826 6	2.46111989983636	active	Euro-American
Rv0826 6	2.34668214568935	active	East-Asian
Rv0826 6	2.19655452560269	active	East-Asian
Rv0826 6	2.46111989983636	active	Euro-American
Rv0826 6	2.46111989983636	active	Euro-American
Rv0826 6	2.46111989983636	active	East-Asian
Rv0826 6	2.46111989983636	active	Euro-American
Rv0826 6	2.46111989983636	active	East-Asian
Rv0826 6	1.81686704783428	active	Euro-American
Rv0826 6	0	inactive	Euro-American
Rv0826 6	2.46111989983636	active	Indo-Oceanic
Rv0826 6	2.46111989983636	active	Indo-Oceanic
Rv0826 6	2.46111989983636	active	Indo-Oceanic
Rv0826 6	0.262810835800437	inactive	Euro-American
Rv0826 6	2.46111989983636	active	Euro-American
Rv0826 6	0	inactive	Euro-American
Rv0826 6	0	inactive	Euro-American
Rv0826 6	0	inactive	Euro-American
Rv0826 6	2.46111989983636	active	East-Asian
Rv0826 6	2.07873745327311	active	Euro-American
Rv0826 6	2.46111989983636	active	East-Asian
Rv0826 6	0	inactive	East-African-Indian
Rv0826 6	2.39849534679925	moderately active	M. Africanum, West African 2
Rv0826 6	2.46111989983636	active	Indo-Oceanic
Rv0826 6	2.46111989983636	active	Indo-Oceanic
Rv0826 6	2.46111989983636	active	M. Africanum, West African 1
Rv0826 6	2.46111989983636	active	M. Africanum, West African 1
Rv0826 6	0.146285297901923	inactive	Euro-American
Rv0826 6	0	inactive	Euro-American
Rv0826 6	2.46111989983636	active	East-Asian
Rv0826 6	2.46111989983636	active	Euro-American
Rv0826 6	0	inactive	East-African-Indian
Rv0826 6	0	inactive	Euro-American
Rv0826 6	2.46111989983636	active	Indo-Oceanic
Rv0826 6	0	inactive	Euro-American
Rv0826 6	0	inactive	Euro-American
Rv0826 6	0.224279954253047	inactive	Euro-American
Rv0826 6	2.46111989983636	active	Euro-American
Rv0826 6	0.139369429648619	inactive	Euro-American
Rv0826 6	2.46111989983636	active	Lineage 7
Rv0826 6	2.46111989983636	active	Indo-Oceanic
Rv0826 6	2.43038339968775	active	Indo-Oceanic
Rv0826 6	2.46111989983636	active	Indo-Oceanic
Rv0826 6	2.46111989983636	active	East-Asian
Rv0826 6	2.46111989983636	active	Indo-Oceanic
Rv0826 6	2.46111989983636	active	Indo-Oceanic
Rv0826 6	2.46111989983636	active	Indo-Oceanic
Rv0826 6	2.46111989983636	active	Indo-Oceanic
Rv0826 6	2.46111989983636	active	Indo-Oceanic
Rv0826 6	2.46111989983636	active	East-Asian
Rv0826 6	2.46111989983636	active	Euro-American
Rv0863 19	2.46111989983636	active	East-Asian
Rv0863 19	2.42925191336672	active	East-Asian
Rv0863 19	0.121905888183184	inactive	East-Asian
Rv0863 19	2.24010156119202	active	East-Asian
Rv0863 19	0	inactive	East-African-Indian
Rv0863 19	2.46111989983636	active	East-Asian
Rv0863 19	2.46111989983636	active	Indo-Oceanic
Rv0863 19	2.4078952572746	active	East-Asian
Rv0863 19	1.2189303275189	active	East-Asian
Rv0863 19	0.159485657151321	inactive	Euro-American
Rv0863 19	2.46111989983636	active	East-Asian
Rv0863 19	0	inactive	East-African-Indian
Rv0863 19	2.46111989983636	active	East-Asian
Rv0863 19	2.45494517151192	active	East-Asian
Rv0863 19	2.46111989983636	active	Indo-Oceanic
Rv0863 19	2.14427951601974	active	East-Asian
Rv0863 19	2.44478431127322	active	East-Asian
Rv0863 19	1.93808481831117	active	East-Asian
Rv0863 19	2.30056510539456	active	East-Asian
Rv0863 19	2.40180297774518	active	East-Asian
Rv0863 19	2.11776783758077	active	East-Asian
Rv0863 19	0	inactive	East-African-Indian
Rv0863 19	0	active	East-Asian
Rv0863 19	2.46111989983636	active	East-Asian
Rv0863 19	2.38401833583569	active	East-Asian
Rv0863 19	2.34218742277103	active	East-Asian
Rv0863 19	2.36940688634386	active	East-Asian
Rv0863 19	2.46111989983636	active	East-Asian
Rv0863 19	2.46111989983636	active	East-Asian
Rv0863 19	2.46111989983636	active	East-Asian
Rv0863 19	2.16618608849787	active	East-Asian
Rv0863 19	2.46111989983636	active	East-Asian
Rv0863 19	2.38498677748063	active	East-Asian
Rv0863 19	2.46111989983636	active	Euro-American
Rv0863 19	2.41792777526091	active	East-Asian
Rv0863 19	2.45279031163767	active	East-Asian
Rv0863 19	0	inactive	Euro-American
Rv0863 19	2.21915262345638	active	Indo-Oceanic
Rv0863 19	2.46111989983636	active	Indo-Oceanic
Rv0863 19	2.46006947536838	active	Indo-Oceanic
Rv0863 19	2.46111989983636	active	Euro-American
Rv0863 19	0.089774705018946	inactive	Euro-American
Rv0863 19	0	inactive	Euro-American
Rv0863 19	2.46111989983636	active	East-Asian
Rv0863 19	0.0716732816594615	inactive	Euro-American
Rv0863 19	2.35180997850288	active	East-Asian
Rv0863 19	2.46111989983636	active	Euro-American
Rv0863 19	2.28607295164459	active	East-Asian
Rv0863 19	0.0767480276507666	inactive	East-African-Indian
Rv0863 19	0.990205233549264	moderately active	M. Africanum, West African 2
Rv0863 19	2.46111989983636	active	Indo-Oceanic
Rv0863 19	2.4414108040926	active	Indo-Oceanic
Rv0863 19	2.46111989983636	active	M. Africanum, West African 1
Rv0863 19	0.0888104564515796	inactive	Euro-American
Rv0863 19	0	inactive	Euro-American
Rv0863 19	2.19538930175904	active	East-Asian
Rv0863 19	0	inactive	East-African-Indian
Rv0863 19	0.0554870868472527	inactive	Euro-American
Rv0863 19	0.292754706024475	inactive	Euro-American
Rv0863 19	0	inactive	Euro-American
Rv0863 19	0.0559371233022319	inactive	Euro-American
Rv0863 19	0.23908961423219	inactive	Euro-American
Rv0863 19	2.46111989983636	active	Euro-American
Rv0863 19	0.0922001980112648	inactive	Euro-American
Rv0863 19	2.3871310672724	active	Lineage 7
Rv0863 19	2.26573813405452	active	Indo-Oceanic
Rv0863 19	2.46111989983636	active	Indo-Oceanic
Rv0863 19	2.46111989983636	active	East-Asian
Rv0863 19	2.46111989983636	active	Indo-Oceanic
Rv0863 19	2.4219743994144	active	East-Asian
Rv0863 19	2.39753444360244	active	Indo-Oceanic
Rv0863 19	2.46111989983636	active	Indo-Oceanic
Rv0863 19	2.31280585068318	active	Indo-Oceanic
Rv0863 19	2.37446362731435	active	Indo-Oceanic
Rv0863 19	2.17051001337245	active	Indo-Oceanic
Rv0863 19	2.46111989983636	active	East-Asian
Rv0863 19	2.46111989983636	active	Euro-American
Rv0863 12	2.46111989983636	active	East-Asian
Rv0863 12	2.38475108184868	active	East-Asian
Rv0863 12	0	inactive	East-Asian
Rv0863 12	2.46111989983636	active	East-Asian
Rv0863 12	0	inactive	East-African-Indian
Rv0863 12	2.46111989983636	active	East-Asian
Rv0863 12	2.46111989983636	active	Indo-Oceanic
Rv0863 12	2.46111989983636	active	East-Asian
Rv0863 12	1.51740577047846	active	East-Asian
Rv0863 12	0	inactive	Euro-American
Rv0863 12	2.22688066883327	active	East-Asian
Rv0863 12	0	inactive	East-African-Indian
Rv0863 12	2.46111989983636	active	East-Asian
Rv0863 12	2.46111989983636	active	East-Asian
Rv0863 12	2.38652420433228	active	Indo-Oceanic
Rv0863 12	2.39168942587761	active	East-Asian
Rv0863 12	2.44727481833997	active	East-Asian
Rv0863 12	1.90213171632223	active	East-Asian
Rv0863 12	1.57728942090865	active	East-Asian
Rv0863 12	2.46111989983636	active	East-Asian
Rv0863 12	2.28455962163682	active	East-Asian
Rv0863 12	0	inactive	East-African-Indian
Rv0863 12	0	active	East-Asian
Rv0863 12	2.46111989983636	active	East-Asian
Rv0863 12	2.46111989983636	active	East-Asian
Rv0863 12	2.46111989983636	active	East-Asian
Rv0863 12	2.10040729733202	active	East-Asian
Rv0863 12	2.25173825812932	active	East-Asian
Rv0863 12	2.46111989983636	active	East-Asian
Rv0863 12	1.97082094016585	active	East-Asian
Rv0863 12	2.05328044673897	active	East-Asian
Rv0863 12	2.46111989983636	active	East-Asian
Rv0863 12	2.35345577876238	active	East-Asian
Rv0863 12	2.40914020070733	active	Euro-American
Rv0863 12	2.46111989983636	active	East-Asian
Rv0863 12	2.37493657556344	active	East-Asian
Rv0863 12	0	inactive	Euro-American
Rv0863 12	2.40150152977429	active	Indo-Oceanic
Rv0863 12	2.09643700575211	active	Indo-Oceanic
Rv0863 12	2.43396417526067	active	Indo-Oceanic
Rv0863 12	2.46111989983636	active	Euro-American
Rv0863 12	0	inactive	Euro-American
Rv0863 12	0	inactive	Euro-American
Rv0863 12	2.19816234403679	active	East-Asian
Rv0863 12	0	inactive	Euro-American
Rv0863 12	2.34694229189735	active	East-Asian
Rv0863 12	2.46111989983636	active	Euro-American
Rv0863 12	2.46111989983636	active	East-Asian
Rv0863 12	0.0588943628379682	inactive	East-African-Indian
Rv0863 12	1.21542924566887	moderately active	M. Africanum, West African 2
Rv0863 12	2.46111989983636	active	Indo-Oceanic
Rv0863 12	2.46111989983636	active	Indo-Oceanic
Rv0863 12	2.46111989983636	active	M. Africanum, West African 1
Rv0863 12	0	inactive	Euro-American
Rv0863 12	0	inactive	Euro-American
Rv0863 12	2.19889601996988	active	East-Asian
Rv0863 12	0	inactive	East-African-Indian
Rv0863 12	0	inactive	Euro-American
Rv0863 12	0	inactive	Euro-American
Rv0863 12	0.634713096200165	inactive	Euro-American
Rv0863 12	0	inactive	Euro-American
Rv0863 12	0	inactive	Euro-American
Rv0863 12	2.16527378291055	active	Euro-American
Rv0863 12	0	inactive	Euro-American
Rv0863 12	2.46111989983636	active	Lineage 7
Rv0863 12	2.46111989983636	active	Indo-Oceanic
Rv0863 12	2.18745539906417	active	Indo-Oceanic
Rv0863 12	2.36818957324805	active	East-Asian
Rv0863 12	2.46111989983636	active	Indo-Oceanic
Rv0863 12	2.46111989983636	active	East-Asian
Rv0863 12	2.46111989983636	active	Indo-Oceanic
Rv0863 12	2.46111989983636	active	Indo-Oceanic
Rv0863 12	2.46111989983636	active	Indo-Oceanic
Rv0863 12	2.46111989983636	active	Indo-Oceanic
Rv0863 12	2.46111989983636	active	Indo-Oceanic
Rv0863 12	2.36603035235965	active	East-Asian
Rv0863 12	2.46111989983636	active	Euro-American
Rv0919 27	2.46111989983636	active	East-Asian
Rv0919 27	2.40109246252851	active	East-Asian
Rv0919 27	0	inactive	East-Asian
Rv0919 27	2.45051912426259	active	East-Asian
Rv0919 27	0	inactive	East-African-Indian
Rv0919 27	2.2873728478545	active	East-Asian
Rv0919 27	2.38190957897269	active	Indo-Oceanic
Rv0919 27	2.46111989983636	active	East-Asian
Rv0919 27	2.46111989983636	active	Euro-American
Rv0919 27	2.29252921188619	active	East-Asian
Rv0919 27	0.042333030135487	inactive	Euro-American
Rv0919 27	2.46111989983636	active	East-Asian
Rv0919 27	0	inactive	East-African-Indian
Rv0919 27	2.14358729260744	active	East-Asian
Rv0919 27	2.46111989983636	active	East-Asian
Rv0919 27	2.18274498511149	active	Indo-Oceanic
Rv0919 27	2.46111989983636	active	East-Asian
Rv0919 27	2.46111989983636	active	East-Asian
Rv0919 27	2.29064587294535	active	East-Asian
Rv0919 27	2.23298225417619	active	East-Asian
Rv0919 27	2.46111989983636	active	East-Asian
Rv0919 27	2.46111989983636	active	East-Asian
Rv0919 27	0.133988078815351	inactive	East-African-Indian
Rv0919 27	0.010673340682906	active	East-Asian
Rv0919 27	2.46111989983636	active	East-Asian
Rv0919 27	2.46111989983636	active	East-Asian
Rv0919 27	2.27778042078542	active	East-Asian
Rv0919 27	2.4513664020542	active	East-Asian
Rv0919 27	2.46111989983636	active	East-Asian
Rv0919 27	2.46111989983636	active	East-Asian
Rv0919 27	2.46111989983636	active	East-Asian
Rv0919 27	0.38137776160515	inactive	Euro-American
Rv0919 27	2.46111989983636	active	East-Asian
Rv0919 27	2.46111989983636	active	Euro-American
Rv0919 27	2.46111989983636	active	Euro-American
Rv0919 27	2.46111989983636	active	Euro-American
Rv0919 27	2.27471807027987	active	Euro-American
Rv0919 27	2.29073401666555	active	Euro-American
Rv0919 27	2.46111989983636	active	East-Asian
Rv0919 27	2.46111989983636	active	East-Asian
Rv0919 27	2.40000557555087	active	Euro-American
Rv0919 27	2.46111989983636	active	Euro-American
Rv0919 27	2.45294894053557	active	East-Asian
Rv0919 27	2.46111989983636	active	Euro-American
Rv0919 27	2.46111989983636	active	East-Asian
Rv0919 27	2.36132754443626	active	Euro-American
Rv0919 27	0	inactive	Euro-American
Rv0919 27	2.46111989983636	active	Indo-Oceanic
Rv0919 27	2.46111989983636	active	Indo-Oceanic
Rv0919 27	2.0914318491125	active	Indo-Oceanic
Rv0919 27	0.621441813650242	inactive	Euro-American
Rv0919 27	2.46111989983636	active	Euro-American
Rv0919 27	0.472244341841359	inactive	Euro-American
Rv0919 27	0.0795424208837352	inactive	Euro-American
Rv0919 27	2.46111989983636	active	East-Asian
Rv0919 27	0	inactive	Euro-American
Rv0919 27	2.39877447474001	active	East-Asian
Rv0919 27	2.46111989983636	active	Euro-American
Rv0919 27	2.46111989983636	active	East-Asian
Rv0919 27	0	inactive	East-African-Indian
Rv0919 27	2.46111989983636	moderately active	M. Africanum, West African 2
Rv0919 27	2.41914536184691	active	Indo-Oceanic
Rv0919 27	2.46111989983636	active	Indo-Oceanic
Rv0919 27	2.46111989983636	active	M. Africanum, West African 1
Rv0919 27	2.40159861284946	active	M. Africanum, West African 1
Rv0919 27	0	inactive	Euro-American
Rv0919 27	0	inactive	Euro-American
Rv0919 27	2.46111989983636	active	East-Asian
Rv0919 27	2.46111989983636	active	Euro-American
Rv0919 27	0	inactive	East-African-Indian
Rv0919 27	0	inactive	Euro-American
Rv0919 27	2.10722736658953	active	Indo-Oceanic
Rv0919 27	0.281920900113204	inactive	Euro-American
Rv0919 27	0.129972793973089	inactive	Euro-American
Rv0919 27	0	inactive	Euro-American
Rv0919 27	0	inactive	Euro-American
Rv0919 27	2.46111989983636	active	Euro-American
Rv0919 27	0	inactive	Euro-American
Rv0919 27	2.46111989983636	active	Lineage 7
Rv0919 27	2.19944832726258	active	Indo-Oceanic
Rv0919 27	2.28656741751641	active	Indo-Oceanic
Rv0919 27	2.46111989983636	active	Indo-Oceanic
Rv0919 27	2.29403921811705	active	East-Asian
Rv0919 27	2.33684748174224	active	Indo-Oceanic
Rv0919 27	2.35213953552912	active	East-Asian
Rv0919 27	2.46111989983636	active	Indo-Oceanic
Rv0919 27	2.46111989983636	active	Indo-Oceanic
Rv0919 27	2.46111989983636	active	Indo-Oceanic
Rv0919 27	2.46111989983636	active	Indo-Oceanic
Rv0919 27	2.46111989983636	active	Indo-Oceanic
Rv0919 27	2.46111989983636	active	Indo-Oceanic
Rv0919 27	2.4427934291409	active	East-Asian
Rv0919 27	2.37292083813765	active	Euro-American
Rv0919 20	2.31341443436427	active	East-Asian
Rv0919 20	2.22247266556878	active	East-Asian
Rv0919 20	0	inactive	East-Asian
Rv0919 20	2.37988838827053	active	East-Asian
Rv0919 20	0.139281194683017	inactive	East-African-Indian
Rv0919 20	2.46111989983636	active	East-Asian
Rv0919 20	2.39449766564161	active	Indo-Oceanic
Rv0919 20	2.46111989983636	active	East-Asian
Rv0919 20	2.33848267812575	active	Euro-American
Rv0919 20	2.22246044727595	active	East-Asian
Rv0919 20	0.011495626212894	inactive	Euro-American
Rv0919 20	2.11475441766607	active	East-Asian
Rv0919 20	0.245621654237632	inactive	East-African-Indian
Rv0919 20	2.12362000904948	active	East-Asian
Rv0919 20	2.16631728198504	active	East-Asian
Rv0919 20	2.05259630835451	active	Indo-Oceanic
Rv0919 20	2.46111989983636	active	East-Asian
Rv0919 20	1.71775505282094	active	East-Asian
Rv0919 20	2.42197191902326	active	East-Asian
Rv0919 20	2.46111989983636	active	East-Asian
Rv0919 20	2.05372171213115	active	East-Asian
Rv0919 20	2.29209801814308	active	East-Asian
Rv0919 20	0	inactive	East-African-Indian
Rv0919 20	0	active	East-Asian
Rv0919 20	2.13090625427109	active	East-Asian
Rv0919 20	2.09441994122785	active	East-Asian
Rv0919 20	2.34735130146977	active	East-Asian
Rv0919 20	2.29853599612873	active	East-Asian
Rv0919 20	2.08008631969304	active	East-Asian
Rv0919 20	2.30855947890333	active	East-Asian
Rv0919 20	2.46111989983636	active	East-Asian
Rv0919 20	0	inactive	Euro-American
Rv0919 20	2.00693214056706	active	East-Asian
Rv0919 20	2.06932660928975	active	Euro-American
Rv0919 20	2.05326447068611	active	Euro-American
Rv0919 20	1.98975087341839	active	Euro-American
Rv0919 20	2.24161291755846	active	Euro-American
Rv0919 20	1.91890533056032	active	Euro-American
Rv0919 20	2.05534019257321	active	East-Asian
Rv0919 20	2.25057123879107	active	East-Asian
Rv0919 20	2.03395403810592	active	Euro-American
Rv0919 20	2.05455574258845	active	Euro-American
Rv0919 20	2.45163775709451	active	East-Asian
Rv0919 20	1.35001915938182	active	Euro-American
Rv0919 20	2.04301016090321	active	East-Asian
Rv0919 20	2.35428626023283	active	Euro-American
Rv0919 20	0	inactive	Euro-American
Rv0919 20	2.46111989983636	active	Indo-Oceanic
Rv0919 20	2.04664608962969	active	Indo-Oceanic
Rv0919 20	2.13207383360985	active	Indo-Oceanic
Rv0919 20	0	inactive	Euro-American
Rv0919 20	1.93067232661712	active	Euro-American
Rv0919 20	0	inactive	Euro-American
Rv0919 20	0	inactive	Euro-American
Rv0919 20	2.2998594229972	active	East-Asian
Rv0919 20	0	inactive	Euro-American
Rv0919 20	2.25241722387238	active	East-Asian
Rv0919 20	2.088476029583	active	Euro-American
Rv0919 20	2.40098071264539	active	East-Asian
Rv0919 20	0	inactive	East-African-Indian
Rv0919 20	2.00606112079484	moderately active	M. Africanum, West African 2
Rv0919 20	2.32735481214175	active	Indo-Oceanic
Rv0919 20	2.46111989983636	active	Indo-Oceanic
Rv0919 20	2.46111989983636	active	M. Africanum, West African 1
Rv0919 20	2.40043043866346	active	M. Africanum, West African 1
Rv0919 20	0.253574838883557	inactive	Euro-American
Rv0919 20	0	inactive	Euro-American
Rv0919 20	1.81233818361666	active	East-Asian
Rv0919 20	2.25249133976339	active	Euro-American
Rv0919 20	0.0392479068362021	inactive	East-African-Indian
Rv0919 20	0.243496136691597	inactive	Euro-American
Rv0919 20	2.35224804028188	active	Indo-Oceanic
Rv0919 20	0	inactive	Euro-American
Rv0919 20	0.144867009272784	inactive	Euro-American
Rv0919 20	0.457403983174801	inactive	Euro-American
Rv0919 20	0	inactive	Euro-American
Rv0919 20	2.37718759500328	active	Euro-American
Rv0919 20	0	inactive	Euro-American
Rv0919 20	2.24677066526317	active	Lineage 7
Rv0919 20	2.20662049937544	active	Indo-Oceanic
Rv0919 20	1.82924302205734	active	Indo-Oceanic
Rv0919 20	2.46111989983636	active	Indo-Oceanic
Rv0919 20	1.99263429332573	active	East-Asian
Rv0919 20	2.46111989983636	active	Indo-Oceanic
Rv0919 20	2.20079881479018	active	East-Asian
Rv0919 20	1.86950525790008	active	Indo-Oceanic
Rv0919 20	2.46111989983636	active	Indo-Oceanic
Rv0919 20	2.16742445156276	active	Indo-Oceanic
Rv0919 20	2.230085959238	active	Indo-Oceanic
Rv0919 20	1.94192501486137	active	Indo-Oceanic
Rv0919 20	2.10814934748455	active	Indo-Oceanic
Rv0919 20	2.12455809844533	active	East-Asian
Rv0919 20	2.16316551783074	active	Euro-American
glpX 5	2.46111989983636	active	East-Asian
glpX 5	2.46111989983636	active	East-Asian
glpX 5	0.00896561747306132	inactive	East-Asian
glpX 5	2.43487853885602	active	East-Asian
glpX 5	0	inactive	East-African-Indian
glpX 5	2.46111989983636	active	East-Asian
glpX 5	2.46111989983636	active	Indo-Oceanic
glpX 5	2.46111989983636	active	East-Asian
glpX 5	2.46111989983636	active	Euro-American
glpX 5	1.21828755849919	active	East-Asian
glpX 5	0	inactive	Euro-American
glpX 5	2.46111989983636	active	East-Asian
glpX 5	0	inactive	East-African-Indian
glpX 5	2.46111989983636	active	East-Asian
glpX 5	2.46111989983636	active	East-Asian
glpX 5	2.46111989983636	active	Indo-Oceanic
glpX 5	2.46111989983636	active	East-Asian
glpX 5	2.46111989983636	active	East-Asian
glpX 5	0.882777446632071	active	East-Asian
glpX 5	1.2830002559416	active	East-Asian
glpX 5	2.46111989983636	active	East-Asian
glpX 5	2.46111989983636	active	East-Asian
glpX 5	0.477942480032712	inactive	East-African-Indian
glpX 5	0	active	East-Asian
glpX 5	2.16707455155259	active	East-Asian
glpX 5	2.46111989983636	active	East-Asian
glpX 5	2.46111989983636	active	East-Asian
glpX 5	2.46111989983636	active	East-Asian
glpX 5	2.46111989983636	active	East-Asian
glpX 5	2.42381575729311	active	East-Asian
glpX 5	2.46111989983636	active	East-Asian
glpX 5	0	inactive	Euro-American
glpX 5	2.46111989983636	active	East-Asian
glpX 5	2.46111989983636	active	Euro-American
glpX 5	2.46111989983636	active	Euro-American
glpX 5	2.31842229679567	active	Euro-American
glpX 5	2.46111989983636	active	Euro-American
glpX 5	2.4511673507892	active	Euro-American
glpX 5	2.46111989983636	active	East-Asian
glpX 5	2.25270388810828	active	Euro-American
glpX 5	2.46111989983636	active	Euro-American
glpX 5	2.46111989983636	active	East-Asian
glpX 5	2.46111989983636	active	Euro-American
glpX 5	2.46111989983636	active	East-Asian
glpX 5	2.46111989983636	active	Euro-American
glpX 5	0.150980408257422	inactive	Euro-American
glpX 5	2.46111989983636	active	Indo-Oceanic
glpX 5	2.46111989983636	active	Indo-Oceanic
glpX 5	2.2865621904445	active	Indo-Oceanic
glpX 5	2.46111989983636	active	Euro-American
glpX 5	2.46111989983636	active	East-Asian
glpX 5	0	inactive	Euro-American
glpX 5	2.46111989983636	active	East-Asian
glpX 5	2.46111989983636	active	Euro-American
glpX 5	2.46111989983636	active	East-Asian
glpX 5	0.290731629958865	inactive	East-African-Indian
glpX 5	2.46111989983636	active	Indo-Oceanic
glpX 5	2.46111989983636	active	Indo-Oceanic
glpX 5	0	inactive	Euro-American
glpX 5	0	inactive	Euro-American
glpX 5	2.39868956506573	active	Euro-American
glpX 5	0.110471403609405	inactive	East-African-Indian
glpX 5	0	inactive	Euro-American
glpX 5	2.46111989983636	active	Indo-Oceanic
glpX 5	0	inactive	Euro-American
glpX 5	0.108030241092412	inactive	Euro-American
glpX 5	0	inactive	Euro-American
glpX 5	0	inactive	Euro-American
glpX 5	2.46111989983636	active	Euro-American
glpX 5	0	inactive	Euro-American
glpX 5	2.46111989983636	active	Lineage 7
glpX 5	2.46111989983636	active	Indo-Oceanic
glpX 5	2.46111989983636	active	Indo-Oceanic
glpX 5	2.46111989983636	active	Indo-Oceanic
glpX 5	2.46111989983636	active	Indo-Oceanic
glpX 5	2.46111989983636	active	East-Asian
glpX 5	2.46111989983636	active	Indo-Oceanic
glpX 5	2.2813471142041	active	Indo-Oceanic
glpX 5	2.46111989983636	active	Indo-Oceanic
glpX 5	2.40477267641016	active	Indo-Oceanic
glpX 5	2.46111989983636	active	Indo-Oceanic
glpX 5	2.26748959828569	active	Indo-Oceanic
glpX 5	2.16587048027857	active	East-Asian
glpX 5	2.37434095346138	active	Euro-American
glpX 10	2.46111989983636	active	East-Asian
glpX 10	2.46111989983636	active	East-Asian
glpX 10	0.148161299627987	inactive	East-Asian
glpX 10	2.46111989983636	active	East-Asian
glpX 10	0	inactive	East-African-Indian
glpX 10	2.46111989983636	active	East-Asian
glpX 10	2.46111989983636	active	Indo-Oceanic
glpX 10	2.46111989983636	active	East-Asian
glpX 10	2.46111989983636	active	Euro-American
glpX 10	0.859569804610086	active	East-Asian
glpX 10	0.0782049686828084	inactive	Euro-American
glpX 10	2.46111989983636	active	East-Asian
glpX 10	0	inactive	East-African-Indian
glpX 10	2.46111989983636	active	East-Asian
glpX 10	2.46111989983636	active	East-Asian
glpX 10	2.46111989983636	active	Indo-Oceanic
glpX 10	2.46111989983636	active	East-Asian
glpX 10	2.46111989983636	active	East-Asian
glpX 10	1.80659327911852	active	East-Asian
glpX 10	1.41083204487069	active	East-Asian
glpX 10	2.46111989983636	active	East-Asian
glpX 10	2.46111989983636	active	East-Asian
glpX 10	0.0589899307504854	inactive	East-African-Indian
glpX 10	0	active	East-Asian
glpX 10	2.46111989983636	active	East-Asian
glpX 10	2.46111989983636	active	East-Asian
glpX 10	2.46111989983636	active	East-Asian
glpX 10	2.41082681372384	active	East-Asian
glpX 10	2.43597015737104	active	East-Asian
glpX 10	2.29670383938978	active	East-Asian
glpX 10	2.46111989983636	active	East-Asian
glpX 10	0	inactive	Euro-American
[truncated: 5,135 more rows]
