# Supplementary material for: Drivers and sites of diversity in the DNA adenine methylomes of 93 Mycobacterium tuberculosis complex clinical isolates
Source: eLife. 2020 Oct 27;9:e58542. doi: 10.7554/eLife.58542 (PMC7591249; doi:10.7554/eLife.58542)
Supplement: Supplementary file 1. — For each distinct methyltransferase (MTase) variant found in our MTBC isolates, we measured the resulting sequencing kinetics signals of bases targeted by the MTase motif in that isolate, and from them inferred the activity of the variant MTase, reported here. Variants that were not present in our dataset could potentially be with respect to H37Rv instead of a wild-type MTase. *R47W and G154D were only found in H37Rv and H37Ra. **Inferred to be deleterious, since only found in conjunction with D59G and V616A, which result in wild-type methylation patterns in the absence of this insertion. ***Also inferred to be deleterious, since only found in conjunction with V616A. ****K458N only found in tandem with E481A. *****Consensus activity should be taken as tentative, since this genotype was not observed in our study, and some previously reported as loss-of-function were revealed to be partially active with our method of examining all motif instances. ‘unknown’ means that the effect of the specified mutation cannot be inferred because it does not occur in isolation. †For hsdM variant E481A, our study sequenced the same isolate as Chiner-Oms and colleagues, but our genotyping showed both E481A and K458N in hsdM, while they only reported E481A. Both studies showed a mild reduction in HsdM activity for this isolate, but it is unclear which mutation causes the reduction, or whether the effect is epistatic. [file elife-58542-supp1.xlsx]

## Sheet: Sheet1
Genotype	Phelan et al.	Zhu et al.	Gomez-Gonzalez et al.	Chiner-Oms et al.	Modlin et. al	Consensus activity
mamA
D21N		unknown				unknown
G176D		active				active
DEL_G121			inactive			inactive*****
Q340K			inactive			inactive*****
E270A	inactive	inactive	inactive	large knockdown	large knockdown	large knockdown
A460T	inactive					inactive*****
W136R				inactive	inactive	inactive
L502F					active	active
G152S			inactive	mild knockdown	mild knockdown	mild knockdown
A34V					active	active
mamB
DEL_507-1606	inactive	inactive			inactive	inactive
R47W		unknown	active		unknown*	active
G154D		unknown	unknown		unknown*	unknown
V511M		active				active
S253L	inactive		inactive			inactive*****
INS_G1515			active			active
DEL_C1515			active			active
DEL_G2543					inactive	inactive
INS_1131-1583					inactive**	inactive
D59G				inactive	active	active
V616A					active	active
H770N					inactive***	inactive
K1033T					large knockdown	large knockdown
L452R					active	active
L452V					active	active
R289C					active	active
T658A					active	active
DEL_G3331					active	active
A124V					active	active
V1238I					active	active
G399S					active	active
E533K					active	active
R713H					active	active
T1292R					active	active
R372H					active	active
I925V					active	active
S998L					active	active
hsdM
G173D	unknown	unknown		unknown	unknown	unknown
P306L	inactive	inactive	inactive	inactive	inactive	inactive
K211Q			active			active
DEL_900-909					inactive	inactive
DEL_G1102					active	active
D430A					active	active
F522L					active	active
E436K					active	active
K458N					unknown****	unknown
E481A†				mild knockdown	unknown****	unknown
T393A				inactive		inactive*****
hsdS
L119R	unknown	unknown		unknown	inactive	inactive
S228L					active	active
G25V					active	active
Supplementary Table 1. Activity of observed methyltransferase genotypes. For each distinct methyltransferase (MTase) variant found in the M. tuberculosis and M. africanum isolates in this study, we measured the resulting sequencing kinetics signals of bases targeted by the MTase motif in that isolate, and from them inferred the activity of the variant MTase, reported here. Variants that were not …
