# Supplementary material for: Drivers and sites of diversity in the DNA adenine methylomes of 93 Mycobacterium tuberculosis complex clinical isolates
Source: eLife. 2020 Oct 27;9:e58542. doi: 10.7554/eLife.58542 (PMC7591249; doi:10.7554/eLife.58542)
Supplement: Supplementary file 2. — Methylation activity for the three MTBC m6A DNA methyltransferases and the genotypes of the genes encoding the proteins that comprise them. Each row corresponds to an isolate. [file elife-58542-supp2.xlsx]

## Sheet: S2-MTase-alleles-activities
Lineage	HsdM	hsdM	hsdS	MamA	mamA	MamB	mamB		Legend
East-African-Indian	inactive	G173D	L119R	active	WT	active	WT		HsdM, MamA, MamB	Activity level of the DNA methyltransferase
East-African-Indian	inactive	G173D	L119R	active	WT	active	WT		hsdM, hsdS, mamA, mamB	Genotype of the methyltransferase gene
East-African-Indian	inactive	G173D	L119R	active	WT	active	WT		Each row corresponds to an isolate. Both hsdM and hsdS encode genes required for methyltransferase HsdM to methylate its motif.
East-African-Indian	inactive	G173D	L119R	active	WT	active	WT
East-African-Indian	inactive	G173D	L119R	active	WT	active	WT
East-Asian	active	WT	WT	barely active	E270A	active	WT
East-Asian	active	WT	WT	barely active	E270A	active	WT
East-Asian	inactive	G173D	L119R	active	WT	active	WT
East-Asian	active	WT	WT	barely active	E270A	active	WT
East-Asian	active	WT	WT	barely active	E270A	active	WT
East-Asian	active	WT	WT	barely active	E270A	active	WT
East-Asian	active	WT	WT	barely active	E270A	active	WT
East-Asian	active	WT	WT	barely active	E270A	active	WT
East-Asian	active	WT	WT	barely active	E270A	active	WT
East-Asian	active	WT	WT	barely active	E270A	active	WT
East-Asian	active	WT	WT	barely active	E270A	active	WT
East-Asian	active	WT	WT	barely active	E270A	active	WT
East-Asian	active	WT	WT	barely active	E270A	active	WT
East-Asian	active	WT	WT	barely active	E270A	active	DEL_G3331
East-Asian	active	WT	WT	barely active	E270A	active	WT
East-Asian	active	WT	WT	barely active	E270A	active	WT
East-Asian	inactive	WT	L119R	barely active	E270A	active	WT
East-Asian	active	WT	WT	barely active	E270A	active	WT
East-Asian	active	WT	WT	barely active	E270A	active	WT
East-Asian	active	WT	WT	barely active	E270A	active	WT
East-Asian	active	WT	WT	barely active	E270A	active	WT
East-Asian	active	WT	WT	barely active	E270A	active	WT
East-Asian	active	WT	WT	barely active	E270A	active	WT
East-Asian	active	WT	WT	barely active	E270A	active	WT
East-Asian	active	WT	WT	barely active	E270A	active	WT
East-Asian	active	WT	WT	barely active	E270A	active	WT
East-Asian	active	WT	WT	barely active	E270A	active	WT
East-Asian	active	WT	WT	barely active	E270A	active	WT
East-Asian	active	WT	WT	barely active	E270A	active	WT
East-Asian	active	WT	WT	barely active	E270A	active	WT
East-Asian	active	WT	WT	barely active	E270A	active	WT
East-Asian	active	WT	WT	barely active	E270A	active	WT
East-Asian	active	WT	WT	barely active	E270A	active	WT
East-Asian	active	WT	WT	barely active	E270A	active	WT
East-Asian	active	WT	WT	active	WT	active	L452R
East-Asian	active	WT	WT	barely active	E270A	active	WT
Euro-American	active	WT	WT	active	WT	active	WT
Euro-American	inactive	P306L	WT	active	WT	inactive	DEL_507-1606
Euro-American	inactive	P306L	WT	active	WT	inactive	DEL_507-1606
Euro-American	active	WT	WT	active	WT	active	WT
Euro-American	active	WT	WT	active	WT	active	WT
Euro-American	active	WT	WT	active	WT	active	WT
Euro-American	active	WT	WT	active	WT	active	WT
Euro-American	active	WT	WT	active	WT	active	WT
Euro-American	active	WT	G25V	active	WT	active	WT
Euro-American	active	WT	WT	active	WT	active	WT
Euro-American	active	WT	WT	active	WT	inactive	DEL_G2543
Euro-American	active	DEL_G1102	WT	active	WT	active	WT
Euro-American	inactive	P306L	WT	active	WT	active	WT
Euro-American	inactive	P306L	WT	moderately active	G152S	active	WT
Euro-American	active	WT	WT	active	WT	active	V1238I
Euro-American	inactive	P306L	WT	moderately active	G152S	active	WT
Euro-American	inactive	P306L	WT	moderately active	G152S	active	WT
Euro-American	inactive	P306L	WT	active	WT	active	WT
Euro-American	active	WT	G25V	active	WT	active	WT
Euro-American	inactive	P306L	WT	active	WT	active	WT
Euro-American	inactive	DEL_900-909	G25V	active	L502F	active	G399S
Euro-American	active	WT	G25V	active	WT	barely active	K1033T
Euro-American	inactive	P306L	WT	moderately active	G152S	active	WT
Euro-American	inactive	P306L	WT	active	WT	active	WT
Euro-American	inactive	P306L	WT	active	WT	active	WT
Euro-American	inactive	P306L	WT	active	WT	inactive	DEL_507-1606
Euro-American	inactive	P306L	WT	active	WT	active	R713H
Euro-American	active	WT	G25V	active	WT	active	WT
Euro-American	inactive	P306L	WT	active	WT	inactive	DEL_507-1606
Euro-American	active	WT	WT	active	WT	active	WT
Indo-Oceanic	active	WT	WT	active	WT	active	E533K,V616A
Indo-Oceanic	active	WT	WT	active	WT	active	A124V,V616A
Indo-Oceanic	active	WT	WT	inactive	W136R	inactive	D59G,V616A,INS_1131-1583
Indo-Oceanic	active	WT	WT	inactive	W136R	active	D59G,V616A
Indo-Oceanic	active	WT	WT	inactive	W136R	active	D59G,V616A
Indo-Oceanic	active	WT	WT	active	WT	active	V616A
Indo-Oceanic	active	WT	WT	inactive	W136R	inactive	D59G,V616A,INS_1131-1583
Indo-Oceanic	active	WT	WT	active	A34V	active	V616A
Indo-Oceanic	active	WT	WT	active	WT	active	V616A
Indo-Oceanic	active	WT	S228L	active	WT	active	V616A
Indo-Oceanic	active	WT	S228L	active	WT	active	V616A
Indo-Oceanic	active	WT	WT	active	WT	active	V616A
Indo-Oceanic	active	F522L	WT	active	WT	active	V616A
Indo-Oceanic	active	F522L	WT	active	WT	active	V616A,T1292R
Indo-Oceanic	active	WT	WT	active	WT	active	V616A
Indo-Oceanic	active	WT	WT	active	WT	active	V616A
Indo-Oceanic	active	WT	WT	active	WT	inactive	V616A,H770N
Indo-Oceanic	active	WT	WT	active	WT	inactive	V616A,H770N
Ethiopian	active	D430A	WT	active	WT	active	R327H,I925V,S998L
M. africanum, West African 2	moderately active	K458N,E481A	WT	active	WT	active	R289C,T658A
M. africanum, West African 1	active	E436K	WT	active	WT	active	L452V
M. africanum, West African 1	active	E436K	WT	active	WT	active	L452V
