# Supplementary material for: Drivers and sites of diversity in the DNA adenine methylomes of 93 Mycobacterium tuberculosis complex clinical isolates
Source: eLife. 2020 Oct 27;9:e58542. doi: 10.7554/eLife.58542 (PMC7591249; doi:10.7554/eLife.58542)
Supplement: Supplementary file 3. — MTase motif site loci were assigned by our methylome annotation pipeline, using characterized MTase target motifs, and nearby genes transferred from H37Rv references by Rapid Annotation Transfer Tool (RATT). [file elife-58542-supp3.xlsx]

## Sheet: S2-distilled-MTase-motifs-CDS
MTase	RefLoci	CDSid	CDS	median	mean	sd		Legend
MamA	antisense_dnaA_520_to_stop	antisense dnaA 1003	dnaA	2.99222	2.95627	0.318081		RefLoci	References the distance to the nearest CDS boundary
MamA	sense_dnaA_517_to_stop	sense dnaA 1006	dnaA	2.77539	2.78982	0.245215		CDSid	Only filled out if the locus is intragenic. The position within the CDS. Numbered with respect to the orientation of the CDS
MamB	antisense_recF_22_from_start	sense recF 22	recF	3.24016	3.20054	0.220051		CDS	The CDS within which the locus falls
MamA	antisense_recF_506_from_start	antisense recF 506	recF	1.80861	1.80809	0.234004		median	The median log2(IPD Ratio) at the specified locus among all sites with the specified Mtase active
MamA	sense_recF_509_from_start	sense recF 509	recF	3.15247	3.14589	0.224859		mean	The mean log2(IPD Ratio) at the specified locus among all sites with the specified Mtase active
HsdM	77_up_of_gyrB	intergenic none NA	none	2.78891	2.74433	0.220988		sd	The standard deviation of log2(IPD Ratio) at the specified locus among all sites with the specified Mtase active
HsdM	70_up_of_gyrB	intergenic none NA	none	2.5379	2.53618	0.225437		All fields referencing log2(IPD Ratio) were calculated using the run-specific scaled IPD Ratio. Every isolate was scaled such that the mean IPD Ratio of all non-motif adenines == 1
HsdM	9_up_of_gyrB	intergenic none NA	none	3.04482	3.03748	0.220794
HsdM	2_up_of_gyrB	intergenic none NA	none	2.58407	2.57288	0.212277
MamA	antisense_gyrB_67_from_start	sense gyrB 67	gyrB	2.96858	2.95995	0.237706
MamA	sense_gyrB_70_from_start	antisense gyrB 70	gyrB	2.62383	2.57816	0.217372
MamA	antisense_gyrB_256_to_stop	antisense gyrB 1771	gyrB	3.21261	3.15862	0.26427
MamA	sense_gyrB_253_to_stop	sense gyrB 1774	gyrB	2.51142	2.49973	0.267648
MamB	antisense_gyrA_580_from_start	sense gyrA 580	gyrA	2.827	2.80304	0.255942
MamA	antisense_gyrA_613_from_start	sense gyrA 613	gyrA	2.83413	2.83515	0.214893
MamA	sense_gyrA_616_from_start	antisense gyrA 616	gyrA	2.83811	2.87688	0.218659
HsdM	sense_gyrA_1031_to_stop	antisense gyrA 1485	gyrA	2.58116	2.56246	0.233961
HsdM	antisense_gyrA_1024_to_stop	sense gyrA 1492	gyrA	2.74012	2.68039	0.30116
HsdM	sense_gyrA_314_to_stop	sense gyrA 2202	gyrA	2.42914	2.41942	0.21908
HsdM	antisense_gyrA_307_to_stop	antisense gyrA 2209	gyrA	2.85365	2.86014	0.187224
MamA	antisense_Rv0007_119_from_start	antisense Rv0007 119	Rv0007	3.23398	3.23354	0.263959
MamA	sense_Rv0007_122_from_start	sense Rv0007 122	Rv0007	2.68422	2.68201	0.258582
MamA	antisense_Rv0007_149_to_stop	sense Rv0007 765	Rv0007	2.75655	2.71221	0.230147
MamA	sense_Rv0007_146_to_stop	antisense Rv0007 768	Rv0007	3.06352	3.03312	0.266564
MamB	antisense_pbpA_655_to_stop	antisense pbpA 820	pbpA	3.04674	3.06455	0.244558
MamB	antisense_pbpA_100_from_start	sense pbpA 100	pbpA	3.1394	3.16261	0.208138
MamA	sense_pstP_388_to_stop	antisense pstP 1156	pstP	2.6759	2.69801	0.207266
MamA	antisense_pstP_391_to_stop	sense pstP 1153	pstP	2.53681	2.53388	0.205331
MamA	sense_Rv0021c_185_from_start	antisense Rv0021c 185	Rv0021c	3.10802	3.11553	0.254173
MamA	antisense_Rv0021c_182_from_start	sense Rv0021c 182	Rv0021c	3.14483	3.13099	0.286641
MamA	antisense_Rv0023_217_to_stop	sense Rv0023 553	Rv0023	2.85041	2.81578	0.261539
MamA	sense_Rv0023_214_to_stop	antisense Rv0023 556	Rv0023	2.70435	2.67672	0.260958
MamB	antisense_Rv0024_418_to_stop	sense Rv0024 427	Rv0024	3.22165	3.20164	0.211868
HsdM	19_up_of_Rv0029	intergenic none NA	none	2.63366	2.63514	0.210655
HsdM	12_up_of_Rv0029	intergenic none NA	none	2.3777	2.35992	0.25329
MamB	sense_Rv0030_118_from_start	sense Rv0030 118	Rv0030	2.57085	2.59944	0.198722
MamA	antisense_bioF2_625_from_start	sense bioF2 625	bioF2	3.06551	3.02456	0.187058
MamA	sense_bioF2_628_from_start	antisense bioF2 628	bioF2	2.83893	2.82387	0.194862
MamA	antisense_fadD34_817_from_start	antisense fadD34 817	fadD34	2.51282	2.48919	0.287283
MamA	sense_fadD34_820_from_start	sense fadD34 820	fadD34	2.24086	2.22567	0.208215
MamB	antisense_Rv0036c_31_from_start	sense Rv0036c 31	Rv0036c	2.85442	2.86763	0.204124
MamB	sense_Rv0039c_127_from_start	antisense Rv0039c 127	Rv0039c	2.21934	2.1923	0.201739
MamA	sense_mtc28_352_from_start	antisense mtc28 352	mtc28	2.24723	2.24425	0.217759
MamA	antisense_mtc28_349_from_start	sense mtc28 349	mtc28	3.2078	3.24381	0.194003
MamA	antisense_leuS_595_to_stop	antisense leuS 2314	leuS	3.06989	3.07198	0.296177
MamA	sense_leuS_592_to_stop	sense leuS 2317	leuS	2.28531	2.32654	0.273918
MamA	sense_Rv0042c_67_to_stop	antisense Rv0042c 559	Rv0042c	3.06498	3.08462	0.295369
MamA	antisense_Rv0042c_70_to_stop	sense Rv0042c 556	Rv0042c	2.69667	2.70465	0.249654
MamB	2_up_of_Rv0045c	intergenic none NA	none	2.70258	2.72995	0.242941
MamA	sense_ino1_196_to_stop	sense ino1 907	ino1	3.03834	3.02507	0.218713
MamA	antisense_ino1_199_to_stop	antisense ino1 904	ino1	2.80755	2.80032	0.185145
MamA	sense_ino1_367_to_stop	sense ino1 736	ino1	2.76496	2.78218	0.196096
MamA	antisense_ino1_370_to_stop	antisense ino1 733	ino1	3.1095	3.12801	0.246651
MamA	sense_Rv0047c_7_from_start	sense Rv0047c 7	Rv0047c	2.93519	2.90368	0.245568
MamA	antisense_Rv0047c_4_from_start	sense Rv0047c 4	Rv0047c	3.08775	3.11736	0.252581
MamA	sense_Rv0048c_412_to_stop	sense Rv0048c 457	Rv0048c	3.33346	3.3678	0.281369
MamA	antisense_Rv0048c_415_to_stop	antisense Rv0048c 454	Rv0048c	3.30196	3.24667	0.241895
MamB	antisense_Rv0048c_103_from_start	sense Rv0048c 103	Rv0048c	2.68431	2.65252	0.220877
MamB	antisense_Rv0051_271_to_stop	antisense Rv0051 1411	Rv0051	3.17019	3.1782	0.239217
MamA	81_down_of_Rv0052	intergenic none NA	none	2.81259	2.82258	0.214973
MamA	84_down_of_Rv0052	intergenic none NA	none	2.62846	2.60034	0.25053
MamB	antisense_rpsR1_86_to_stop	antisense rpsR1 168	rpsR1	2.61659	2.62912	0.24133
MamA	antisense_dnaB_766_from_start	sense dnaB 766	dnaB	2.8689	2.84788	0.221213
MamA	sense_dnaB_769_from_start	antisense dnaB 769	dnaB	2.61279	2.58166	0.249372
MamA	antisense_Rv0060_523_to_stop	sense Rv0060 535	Rv0060	2.2646	2.27944	0.277934
MamA	sense_Rv0060_520_to_stop	antisense Rv0060 538	Rv0060	3.04505	3.00864	0.268813
MamA	antisense_Rv0060_469_to_stop	sense Rv0060 589	Rv0060	2.8949	2.84112	0.280079
MamA	sense_Rv0060_466_to_stop	antisense Rv0060 592	Rv0060	2.59917	2.58422	0.226944
HsdM	sense_Rv0064_165_from_start	sense Rv0064 165	Rv0064	2.77389	2.72563	0.215865
HsdM	antisense_Rv0064_172_from_start	antisense Rv0064 172	Rv0064	2.69945	2.65096	0.209932
MamA	antisense_Rv0064_577_to_stop	antisense Rv0064 2362	Rv0064	3.18983	3.20634	0.220986
MamA	sense_Rv0064_574_to_stop	sense Rv0064 2365	Rv0064	2.36802	2.37288	0.230158
MamA	sense_icd2_16_to_stop	sense icd2 2184	icd2	2.83491	2.82419	0.249157
MamA	antisense_icd2_19_to_stop	antisense icd2 2181	icd2	3.17968	3.0861	0.342224
MamA	sense_icd2_556_to_stop	antisense icd2 1644	icd2	2.56862	2.56511	0.207522
MamA	antisense_icd2_559_to_stop	sense icd2 1641	icd2	2.65568	2.66751	0.207393
MamA	antisense_Rv0068_421_to_stop	sense Rv0068 490	Rv0068	2.26771	2.2678	0.238999
MamA	sense_Rv0068_418_to_stop	antisense Rv0068 493	Rv0068	2.61087	2.60586	0.219567
MamA	antisense_Rv0068_89_to_stop	antisense Rv0068 822	Rv0068	2.38372	2.39584	0.192538
MamA	sense_Rv0068_86_to_stop	sense Rv0068 825	Rv0068	2.52641	2.5065	0.251618
MamA	sense_sdaA_417_to_stop	sense sdaA 968	sdaA	2.72987	2.71648	0.234394
MamA	antisense_sdaA_420_to_stop	antisense sdaA 965	sdaA	3.0456	3.04574	0.280476
MamB	antisense_hycE_124_from_start	antisense hycE 124	hycE	2.8462	2.84821	0.239169
MamB	antisense_hycE_589_to_stop	sense hycE 889	hycE	3.42077	3.40504	0.253638
HsdM	sense_hycE_203_to_stop	sense hycE 1275	hycE	2.56565	2.46467	0.466616
HsdM	antisense_hycE_196_to_stop	antisense hycE 1282	hycE	2.17559	2.10112	0.538962
MamB	antisense_Rv0090_373_from_start	antisense Rv0090 373	Rv0090	2.89952	2.89235	0.219826
MamB	antisense_ctpA_77_from_start	sense ctpA 77	ctpA	2.46691	2.46097	0.252194
MamA	sense_Rv0093c_104_from_start	antisense Rv0093c 104	Rv0093c	3.27005	3.20116	0.242362
MamA	antisense_Rv0093c_101_from_start	sense Rv0093c 101	Rv0093c	3.24122	3.1979	0.240686
HsdM	sense_PPE1_0_from_start	sense PPE1 0	PPE1	2.50911	2.51307	0.222772
HsdM	antisense_PPE1_7_from_start	sense PPE1 7	PPE1	2.40785	2.4028	0.244019
MamA	antisense_PPE1_622_from_start	antisense PPE1 622	PPE1	2.17688	2.15817	0.37592
MamA	sense_PPE1_625_from_start	sense PPE1 625	PPE1	2.30702	2.20256	0.427997
MamA	antisense_fadD10_757_from_start	antisense fadD10 757	fadD10	2.84427	2.78264	0.473882
MamA	sense_fadD10_760_from_start	sense fadD10 760	fadD10	2.38988	2.30498	0.395155
MamA	antisense_fadD10_394_to_stop	antisense fadD10 1228	fadD10	3.04207	2.98589	0.352396
MamA	sense_fadD10_391_to_stop	sense fadD10 1231	fadD10	3.00601	2.96609	0.275486
MamA	antisense_Rv0100_28_to_stop	antisense Rv0100 208	Rv0100	3.24173	3.21275	0.225351
MamA	sense_Rv0100_25_to_stop	sense Rv0100 211	Rv0100	2.42453	2.44241	0.20732
MamA	antisense_nrp_178_from_start	antisense nrp 178	nrp	2.81217	2.76638	0.185156
MamA	sense_nrp_181_from_start	sense nrp 181	nrp	2.73371	2.72809	0.254058
MamA	antisense_nrp_2823_from_start	antisense nrp 2823	nrp	2.90536	2.86727	0.269979
MamA	sense_nrp_2826_from_start	sense nrp 2826	nrp	3.04318	3.02332	0.193885
MamA	antisense_nrp_1081_to_stop	sense nrp 6457	nrp	2.78566	2.79854	0.270269
MamA	sense_nrp_1078_to_stop	antisense nrp 6460	nrp	2.70557	2.67274	0.268559
MamA	antisense_nrp_1012_to_stop	sense nrp 6526	nrp	2.99098	3.02047	0.26359
MamA	sense_nrp_1009_to_stop	antisense nrp 6529	nrp	2.24786	2.24526	0.27901
MamA	7_up_of_Rv0102	intergenic none NA	none	3.20436	3.19885	0.233081
MamA	4_up_of_Rv0102	intergenic none NA	none	2.91598	2.87869	0.272277
MamA	antisense_Rv0102_398_from_start	sense Rv0102 398	Rv0102	2.8267	2.82618	0.253032
MamA	sense_Rv0102_401_from_start	antisense Rv0102 401	Rv0102	2.42992	2.38934	0.248849
HsdM	antisense_ctpB_207_to_stop	sense ctpB 2051	ctpB	2.91782	2.89556	0.214411
HsdM	sense_ctpB_214_to_stop	antisense ctpB 2044	ctpB	2.67541	2.65824	0.233264
MamB	antisense_ctpB_712_from_start	antisense ctpB 712	ctpB	2.99378	3.02508	0.261858
HsdM	antisense_ctpB_135_from_start	sense ctpB 135	ctpB	2.76993	2.74863	0.234685
HsdM	sense_ctpB_128_from_start	antisense ctpB 128	ctpB	2.67141	2.66962	0.214976
MamA	sense_ctpB_11_from_start	antisense ctpB 11	ctpB	2.73643	2.73931	0.200577
MamA	antisense_ctpB_8_from_start	antisense ctpB 8	ctpB	3.11482	3.12394	0.243822
MamA	antisense_Rv0106_289_from_start	antisense Rv0106 289	Rv0106	3.0653	3.06414	0.258253
MamA	sense_Rv0106_292_from_start	sense Rv0106 292	Rv0106	3.20456	3.19937	0.271077
MamA	antisense_Rv0106_268_to_stop	sense Rv0106 928	Rv0106	2.42241	2.4768	0.216564
MamA	sense_Rv0106_265_to_stop	antisense Rv0106 931	Rv0106	2.97502	2.96985	0.24631
HsdM	sense_Rv0106_206_to_stop	antisense Rv0106 990	Rv0106	2.59776	2.64971	0.236683
HsdM	antisense_Rv0106_199_to_stop	sense Rv0106 997	Rv0106	2.51597	2.48931	0.197638
MamB	antisense_ctpI_364_from_start	antisense ctpI 364	ctpI	2.39097	2.40432	0.207188
MamB	sense_ctpI_64_from_start	sense ctpI 64	ctpI	2.85663	2.84863	0.24267
MamA	697_up_of_ctpI	intergenic none NA	none	2.75163	2.74372	0.276821
MamA	700_up_of_ctpI	intergenic none NA	none	2.81556	2.82665	0.243171
MamA	484_down_of_Rv0108c	intergenic none NA	none	3.42402	3.41435	0.245043
MamA	481_down_of_Rv0108c	intergenic none NA	none	3.20117	3.21883	0.225568
MamA	sense_Rv0108c_88_to_stop	antisense Rv0108c 121	Rv0108c	2.69331	2.68361	0.215569
MamA	antisense_Rv0108c_91_to_stop	sense Rv0108c 118	Rv0108c	3.14561	3.0879	0.259672
MamB	65_up_of_Rv0108c	intergenic none NA	none	2.9449	2.93162	0.251337
MamB	antisense_Rv0108c_102_from_start	sense Rv0108c 102	Rv0108c	2.86128	2.88629	0.204899
MamA	antisense_Rv0111_508_to_stop	antisense Rv0111 1549	Rv0111	2.6025	2.59827	0.234284
MamA	sense_Rv0111_505_to_stop	sense Rv0111 1552	Rv0111	3.24774	3.23467	0.243424
HsdM	sense_gca_460_from_start	sense gca 460	gca	1.77602	1.54678	0.781034
HsdM	antisense_gca_467_from_start	antisense gca 467	gca	1.50892	1.31814	0.716231
HsdM	sense_gmhB_222_from_start	sense gmhB 222	gmhB	2.67528	2.69087	0.219513
HsdM	antisense_gmhB_229_from_start	antisense gmhB 229	gmhB	2.59618	2.60921	0.22971
MamA	antisense_hddA_298_from_start	antisense hddA 298	hddA	3.0585	3.0435	0.259908
MamA	sense_hddA_301_from_start	sense hddA 301	hddA	2.83574	2.83955	0.223947
HsdM	149_down_of_ldtA	intergenic none NA	none	2.81197	2.81652	0.240345
HsdM	142_down_of_ldtA	intergenic none NA	none	2.51385	2.52415	0.23396
MamA	sense_ldtA_149_to_stop	sense ldtA 606	ldtA	3.16128	3.16951	0.270464
MamA	antisense_ldtA_152_to_stop	antisense ldtA 603	ldtA	1.75523	1.74915	0.306116
MamA	antisense_oxyS_16_from_start	antisense oxyS 16	oxyS	3.13019	3.13939	0.265836
MamA	sense_oxyS_19_from_start	sense oxyS 19	oxyS	2.58684	2.57136	0.257739
MamB	sense_oxyS_28_to_stop	antisense oxyS 916	oxyS	3.24321	3.23449	0.227387
MamA	sense_oxcA_145_to_stop	sense oxcA 1603	oxcA	2.37137	2.3546	0.307927
MamA	antisense_oxcA_148_to_stop	antisense oxcA 1600	oxcA	2.60962	2.6428	0.277115
MamA	antisense_fadD7_760_to_stop	sense fadD7 817	fadD7	2.84088	2.81265	0.311649
MamA	sense_fadD7_757_to_stop	antisense fadD7 820	fadD7	2.47345	2.46502	0.352789
MamA	sense_fusA2_754_from_start	sense fusA2 754	fusA2	2.64727	2.63864	0.309179
MamA	antisense_fusA2_751_from_start	antisense fusA2 751	fusA2	2.18289	2.19432	0.346533
MamA	8_up_of_fusA2	intergenic none NA	none	2.74543	2.75664	0.215777
MamA	11_up_of_fusA2	intergenic none NA	none	2.75883	2.75188	0.222051
MamA	antisense_PE_PGRS2_251_from_start	sense PE_PGRS2 251	PE_PGRS2	3.23788	3.23752	0.204906
MamA	sense_PE_PGRS2_254_from_start	antisense PE_PGRS2 254	PE_PGRS2	3.34826	3.33131	0.240859
MamA	antisense_ephF_216_from_start	antisense ephF 216	ephF	3.12375	3.09378	0.297024
MamA	sense_ephF_219_from_start	sense ephF 219	ephF	2.71687	2.71643	0.250328
MamA	antisense_cyp138_400_to_stop	sense cyp138 925	cyp138	2.78395	2.75298	0.218138
MamA	sense_cyp138_397_to_stop	antisense cyp138 928	cyp138	1.44001	1.39832	0.262993
MamB	antisense_cyp138_475_from_start	antisense cyp138 475	cyp138	2.69562	2.70556	0.25131
MamA	sense_msrA_65_to_stop	antisense msrA 483	msrA	2.84067	2.80502	0.210359
MamA	antisense_msrA_68_to_stop	sense msrA 480	msrA	3.1934	3.17504	0.261976
MamA	antisense_Rv0139_403_to_stop	sense Rv0139 619	Rv0139	3.04778	2.99828	0.244875
MamA	sense_Rv0139_400_to_stop	antisense Rv0139 622	Rv0139	2.46443	2.46921	0.228839
MamA	antisense_Rv0142_322_to_stop	sense Rv0142 604	Rv0142	3.30313	3.31726	0.239073
MamA	sense_Rv0142_319_to_stop	antisense Rv0142 607	Rv0142	2.70694	2.71692	0.189492
MamA	sense_Rv0141c_117_from_start	antisense Rv0141c 117	Rv0141c	3.20193	3.16182	0.295278
MamA	antisense_Rv0141c_114_from_start	sense Rv0141c 114	Rv0141c	2.68697	2.68763	0.213498
MamA	antisense_Rv0142_264_to_stop	sense Rv0142 662	Rv0142	2.04069	2.04666	0.232027
MamA	sense_Rv0142_261_to_stop	antisense Rv0142 665	Rv0142	2.66385	2.67006	0.214464
MamA	antisense_Rv0142_115_to_stop	sense Rv0142 811	Rv0142	3.18061	3.17889	0.213193
MamA	sense_Rv0142_112_to_stop	antisense Rv0142 814	Rv0142	3.26259	3.23322	0.251546
MamA	sense_Rv0143c_132_to_stop	sense Rv0143c 1346	Rv0143c	2.60306	2.60891	0.231011
MamA	antisense_Rv0143c_135_to_stop	sense Rv0143c 1343	Rv0143c	2.15123	2.14785	0.298847
MamB	sense_Rv0145_244_to_stop	antisense Rv0145 709	Rv0145	3.01349	3.01544	0.265887
MamB	antisense_Rv0146_424_to_stop	sense Rv0146 508	Rv0146	3.09326	3.08279	0.217481
HsdM	sense_Rv0147_595_from_start	sense Rv0147 595	Rv0147	2.74925	2.73884	0.248652
HsdM	antisense_Rv0147_602_from_start	antisense Rv0147 602	Rv0147	2.45965	2.49348	0.184744
MamA	antisense_Rv0148_35_from_start	antisense Rv0148 35	Rv0148	2.86347	2.83025	0.25425
MamA	sense_Rv0148_38_from_start	sense Rv0148 38	Rv0148	3.12195	3.1142	0.207214
MamA	antisense_Rv0148_322_to_stop	sense Rv0148 538	Rv0148	3.21293	3.19305	0.3013
MamA	sense_Rv0148_319_to_stop	antisense Rv0148 541	Rv0148	2.44255	2.45487	0.213763
MamB	sense_PE1_676_to_stop	antisense PE1 1090	PE1	2.53468	2.52508	0.227826
MamA	sense_PE2_514_from_start	sense PE2 514	PE2	2.788	2.7903	0.246272
MamA	antisense_PE2_511_from_start	antisense PE2 511	PE2	3.08063	3.05993	0.281123
MamA	sense_fadE2_214_from_start	antisense fadE2 214	fadE2	2.54084	2.56842	0.249798
MamA	antisense_fadE2_211_from_start	antisense fadE2 211	fadE2	2.85225	2.87154	0.281191
MamA	antisense_pntB_400_to_stop	antisense pntB 1027	pntB	3.34039	3.29902	0.280946
MamA	sense_pntB_397_to_stop	sense pntB 1030	pntB	2.9458	2.88719	0.267577
HsdM	antisense_PE3_117_to_stop	antisense PE3 1289	PE3	2.34524	2.35424	0.212008
HsdM	sense_PE3_124_to_stop	sense PE3 1282	PE3	2.56414	2.5532	0.238848
MamA	sense_PE4_400_to_stop	antisense PE4 1108	PE4	3.3363	3.30563	0.219506
MamA	antisense_PE4_403_to_stop	sense PE4 1105	PE4	3.16116	3.14678	0.259438
MamA	antisense_Rv0161_173_from_start	sense Rv0161 173	Rv0161	3.22856	3.228	0.217359
MamA	sense_Rv0161_176_from_start	antisense Rv0161 176	Rv0161	3.36491	3.30698	0.261553
HsdM	sense_Rv0161_280_from_start	antisense Rv0161 280	Rv0161	2.19313	2.2046	0.310505
HsdM	antisense_Rv0161_287_from_start	sense Rv0161 287	Rv0161	2.50698	2.5103	0.213837
MamA	antisense_TB18.5_55_to_stop	antisense TB18.5 430	TB18.5	2.9201	2.92984	0.202189
MamA	sense_TB18.5_52_to_stop	sense TB18.5 433	TB18.5	3.26707	3.27828	0.213384
MamA	sense_mce1R_223_from_start	antisense mce1R 223	mce1R	2.85518	2.86845	0.236965
MamA	antisense_mce1R_220_from_start	sense mce1R 220	mce1R	3.17163	3.2067	0.241242
MamA	antisense_fadD5_808_from_start	antisense fadD5 808	fadD5	3.4111	3.40416	0.237576
MamA	sense_fadD5_811_from_start	sense fadD5 811	fadD5	2.20683	2.21069	0.243858
MamA	antisense_mce1B_91_to_stop	sense mce1B 949	mce1B	1.79371	1.79838	0.315437
MamA	sense_mce1B_88_to_stop	antisense mce1B 952	mce1B	2.76461	2.73333	0.251352
MamB	sense_mce1D_316_to_stop	sense mce1D 1276	mce1D	3.06752	3.08032	0.250362
MamB	sense_mce1D_259_to_stop	sense mce1D 1333	mce1D	2.57666	2.58051	0.200362
MamA	antisense_mce1F_327_to_stop	antisense mce1F 1220	mce1F	1.86587	1.87427	0.276321
MamA	sense_mce1F_324_to_stop	sense mce1F 1223	mce1F	2.95592	2.99983	0.244307
MamB	sense_Rv0175_316_from_start	sense Rv0175 316	Rv0175	2.5763	2.59948	0.21387
MamA	sense_lprO_335_from_start	antisense lprO 335	lprO	2.58773	2.58687	0.255628
MamA	antisense_lprO_332_from_start	sense lprO 332	lprO	2.4675	2.47598	0.23676
MamB	26_down_of_Rv0180c	intergenic none NA	none	2.90192	2.90391	0.309108
MamA	sense_sigG_352_from_start	antisense sigG 352	sigG	3.27951	3.23975	0.258389
MamA	antisense_sigG_349_from_start	sense sigG 349	sigG	2.90543	2.91861	0.244157
MamB	antisense_bglS_715_from_start	sense bglS 715	bglS	2.81449	2.80268	0.200665
MamB	antisense_Rv0188_49_from_start	sense Rv0188 49	Rv0188	2.57425	2.57805	0.247038
MamA	sense_ilvD_85_from_start	sense ilvD 85	ilvD	2.69978	2.72785	0.218545
MamA	antisense_ilvD_82_from_start	antisense ilvD 82	ilvD	2.70091	2.71941	0.250502
MamA	16_up_of_Rv0190	intergenic none NA	none	2.6858	2.68137	0.261592
MamA	13_up_of_Rv0190	intergenic none NA	none	1.96299	1.9455	0.25061
MamB	sense_Rv0190_25_from_start	sense Rv0190 25	Rv0190	3.04622	3.04557	0.254301
MamA	7_down_of_Rv0193c	intergenic none NA	none	2.80171	2.76544	0.287618
MamA	4_down_of_Rv0193c	intergenic none NA	none	3.16953	3.16135	0.268215
MamA	antisense_Rv0194_1000_from_start	antisense Rv0194 1000	Rv0194	2.53227	2.58101	0.227172
MamA	sense_Rv0194_1003_from_start	sense Rv0194 1003	Rv0194	2.5576	2.59151	0.258931
MamB	antisense_Rv0194_1726_to_stop	sense Rv0194 1858	Rv0194	2.96531	2.96431	0.222954
HsdM	sense_Rv0194_379_to_stop	sense Rv0194 3205	Rv0194	2.39534	2.41072	0.220923
HsdM	antisense_Rv0194_372_to_stop	antisense Rv0194 3212	Rv0194	2.57278	2.54938	0.2679
MamA	antisense_Rv0196_220_from_start	antisense Rv0196 220	Rv0196	2.72226	2.72055	0.235187
MamA	sense_Rv0196_223_from_start	sense Rv0196 223	Rv0196	3.15441	3.14615	0.249566
MamA	antisense_Rv0197_475_to_stop	antisense Rv0197 1771	Rv0197	2.49358	2.47213	0.196313
MamA	sense_Rv0197_472_to_stop	sense Rv0197 1774	Rv0197	2.17957	2.18533	0.224522
MamA	sense_zmp1_616_from_start	sense zmp1 616	zmp1	2.82778	2.82292	0.197941
MamA	antisense_zmp1_613_from_start	antisense zmp1 613	zmp1	3.04566	3.02407	0.223993
MamA	99_up_of_mmpL11	intergenic none NA	none	2.35793	2.37387	0.278217
MamA	102_up_of_mmpL11	intergenic none NA	none	2.01816	2.06246	0.239088
MamA	sense_mmpL3_1192_to_stop	sense mmpL3 1642	mmpL3	3.63214	3.59119	0.26232
MamA	antisense_mmpL3_1195_to_stop	antisense mmpL3 1639	mmpL3	2.64737	2.6619	0.238227
MamB	sense_mmpL3_118_from_start	antisense mmpL3 118	mmpL3	2.79787	2.81483	0.224079
MamA	sense_Rv0207c_121_to_stop	sense Rv0207c 607	Rv0207c	2.96388	2.94165	0.23456
MamA	antisense_Rv0207c_124_to_stop	antisense Rv0207c 604	Rv0207c	2.55538	2.5477	0.209455
MamA	antisense_Rv0209_301_to_stop	sense Rv0209 784	Rv0209	3.15422	3.16679	0.213463
MamA	sense_Rv0209_298_to_stop	antisense Rv0209 787	Rv0209	2.21806	2.23517	0.223395
MamA	antisense_pckA_499_from_start	sense pckA 499	pckA	3.08371	3.02518	0.255249
MamA	sense_pckA_502_from_start	antisense pckA 502	pckA	2.63326	2.64499	0.211551
MamB	antisense_Rv0210_94_to_stop	antisense Rv0210 1384	Rv0210	2.64815	2.63097	0.226236
MamA	antisense_pckA_639_from_start	sense pckA 639	pckA	2.58071	2.59734	0.270449
MamA	sense_pckA_642_from_start	antisense pckA 642	pckA	2.96583	2.92628	0.241714
MamA	sense_nadR_373_to_stop	sense nadR 598	nadR	2.41439	2.42782	0.244196
MamA	antisense_nadR_376_to_stop	antisense nadR 595	nadR	2.63683	2.67097	0.214973
MamA	20_up_of_fadD4	intergenic none NA	none	2.51875	2.51573	0.196474
MamA	17_up_of_fadD4	intergenic none NA	none	2.7439	2.72452	0.238947
MamB	sense_Rv0216_108_to_stop	antisense Rv0216 905	Rv0216	2.68313	2.67755	0.224721
MamB	antisense_Rv0218_385_to_stop	sense Rv0218 943	Rv0218	3.22157	3.22202	0.242044
MamA	antisense_Rv0218_272_to_stop	antisense Rv0218 1056	Rv0218	2.90336	2.90878	0.225693
MamA	sense_Rv0218_269_to_stop	sense Rv0218 1059	Rv0218	3.13971	3.15874	0.223541
MamB	sense_lipC_265_from_start	sense lipC 265	lipC	3.00303	2.94111	0.202237
MamA	antisense_lipC_331_to_stop	sense lipC 880	lipC	2.51663	2.43776	0.465234
MamA	sense_lipC_328_to_stop	antisense lipC 883	lipC	2.35258	2.27246	0.421171
MamA	antisense_lipC_133_to_stop	antisense lipC 1078	lipC	2.30812	2.2958	0.205908
MamA	sense_lipC_130_to_stop	sense lipC 1081	lipC	3.32448	3.30121	0.239821
MamB	sense_Rv0221_601_from_start	sense Rv0221 601	Rv0221	2.4036	2.41178	0.203276
MamB	antisense_Rv0224c_46_to_stop	antisense Rv0224c 718	Rv0224c	2.85592	2.89004	0.272592
MamB	antisense_Rv0225_127_to_stop	antisense Rv0225 1027	Rv0225	3.0131	2.99751	0.25464
MamB	sense_Rv0227c_118_to_stop	antisense Rv0227c 1147	Rv0227c	3.21983	3.23404	0.269402
MamA	sense_Rv0227c_150_to_stop	antisense Rv0227c 1115	Rv0227c	3.1185	3.14044	0.249356
MamA	antisense_Rv0227c_153_to_stop	sense Rv0227c 1112	Rv0227c	1.9113	1.93138	0.183877
MamB	sense_Rv0227c_595_from_start	antisense Rv0227c 595	Rv0227c	3.11036	3.11804	0.226722
MamA	antisense_Rv0232_337_to_stop	sense Rv0232 352	Rv0232	2.71301	2.69387	0.240468
MamA	sense_Rv0232_334_to_stop	antisense Rv0232 355	Rv0232	2.52899	2.52212	0.227821
MamB	antisense_gabD1_751_from_start	sense gabD1 751	gabD1	2.84472	2.8459	0.232859
MamA	sense_Rv0235c_391_from_start	sense Rv0235c 391	Rv0235c	2.57877	2.54936	0.255226
MamA	antisense_Rv0235c_388_from_start	antisense Rv0235c 388	Rv0235c	2.81758	2.86631	0.264262
MamA	sense_Rv0235c_49_from_start	sense Rv0235c 49	Rv0235c	3.03523	3.03179	0.22446
MamA	antisense_Rv0235c_46_from_start	antisense Rv0235c 46	Rv0235c	2.99992	2.99739	0.241317
MamA	sense_aftD_326_to_stop	sense aftD 3876	aftD	2.17267	2.19482	0.24994
MamA	antisense_aftD_329_to_stop	antisense aftD 3873	aftD	2.75043	2.74723	0.220963
HsdM	sense_lpqI_510_from_start	sense lpqI 510	lpqI	2.53071	2.52662	0.262917
HsdM	antisense_lpqI_517_from_start	antisense lpqI 517	lpqI	2.68192	2.62688	0.270096
MamA	antisense_vapB24_103_from_start	antisense vapB24 103	vapB24	3.1328	3.08532	0.264722
MamA	sense_vapB24_106_from_start	sense vapB24 106	vapB24	3.28509	3.29334	0.196992
MamA	sense_fabG4_424_from_start	antisense fabG4 424	fabG4	2.745	2.73688	0.201354
MamA	antisense_fabG4_421_from_start	sense fabG4 421	fabG4	2.91911	2.89155	0.230525
MamA	antisense_fadA2_602_to_stop	sense fadA2 720	fadA2	2.84117	2.81764	0.282425
MamA	sense_fadA2_599_to_stop	antisense fadA2 723	fadA2	3.23982	3.21586	0.215239
MamB	antisense_fadE5_742_to_stop	sense fadE5 1093	fadE5	2.62719	2.62617	0.21824
MamA	antisense_Rv0246_72_to_stop	antisense Rv0246 1238	Rv0246	2.52999	2.52972	0.231445
MamA	sense_Rv0246_69_to_stop	sense Rv0246 1241	Rv0246	2.89565	2.86814	0.299044
MamA	sense_Rv0248c_76_to_stop	antisense Rv0248c 1864	Rv0248c	3.22095	3.27222	0.259897
MamA	antisense_Rv0248c_79_to_stop	sense Rv0248c 1861	Rv0248c	3.25517	3.22051	0.236857
MamA	sense_Rv0248c_415_from_start	sense Rv0248c 415	Rv0248c	2.76838	2.75673	0.256192
MamA	antisense_Rv0248c_412_from_start	antisense Rv0248c 412	Rv0248c	2.69851	2.76116	0.20909
HsdM	30_up_of_Rv0250c	intergenic none NA	none	2.72283	2.70573	0.256932
HsdM	37_up_of_Rv0250c	intergenic none NA	none	2.8481	2.87591	0.238571
MamB	antisense_hsp_169_to_stop	antisense hsp 310	hsp	2.54218	2.55781	0.203777
MamB	antisense_nirB_602_to_stop	antisense nirB 1959	nirB	3.12704	3.14092	0.240617
MamA	antisense_nirB_136_to_stop	sense nirB 2425	nirB	3.1783	3.19648	0.26777
MamA	sense_nirB_133_to_stop	antisense nirB 2428	nirB	2.56164	2.54339	0.214927
MamA	sense_PPE2_507_to_stop	antisense PPE2 1163	PPE2	3.19466	3.13483	0.224463
MamA	antisense_PPE2_510_to_stop	sense PPE2 1160	PPE2	2.28668	2.31573	0.224776
MamB	antisense_Rv0260c_334_from_start	sense Rv0260c 334	Rv0260c	3.25644	3.24288	0.240218
MamB	antisense_Rv0260c_349_from_start	sense Rv0260c 349	Rv0260c	2.63869	2.63881	0.225774
MamB	sense_Rv0263c_393_from_start	antisense Rv0263c 393	Rv0263c	3.13608	3.16747	0.243732
MamA	6_down_of_Rv0264c	intergenic none NA	none	2.66625	2.62766	0.234926
MamA	3_down_of_Rv0264c	intergenic none NA	none	3.3213	3.35228	0.250756
MamA	sense_oplA_340_to_stop	antisense oplA 3289	oplA	2.62521	2.63944	0.252817
MamA	antisense_oplA_343_to_stop	sense oplA 3286	oplA	3.05797	3.08695	0.229894
MamA	sense_oplA_421_from_start	sense oplA 421	oplA	1.7757	1.83083	0.309336
MamA	antisense_oplA_418_from_start	antisense oplA 418	oplA	2.33106	2.31303	0.228634
MamA	sense_Rv0269c_496_from_start	antisense Rv0269c 496	Rv0269c	2.81259	2.83019	0.262931
MamA	antisense_Rv0269c_493_from_start	sense Rv0269c 493	Rv0269c	3.22705	3.20853	0.298634
MamA	antisense_fadD2_43_from_start	sense fadD2 43	fadD2	3.06129	3.02016	0.248692
MamA	sense_fadD2_46_from_start	antisense fadD2 46	fadD2	3.00468	2.99788	0.21616
MamA	antisense_fadD2_130_from_start	antisense fadD2 130	fadD2	3.1429	3.12197	0.261089
MamA	sense_fadD2_133_from_start	sense fadD2 133	fadD2	3.17343	3.1758	0.248358
MamA	antisense_fadD2_709_to_stop	sense fadD2 973	fadD2	3.24613	3.22801	0.272047
MamA	sense_fadD2_706_to_stop	antisense fadD2 976	fadD2	2.62822	2.6031	0.209565
HsdM	sense_fadD2_657_to_stop	sense fadD2 1025	fadD2	2.71986	2.7137	0.225534
HsdM	antisense_fadD2_650_to_stop	antisense fadD2 1032	fadD2	2.73792	2.72366	0.242025
MamB	sense_fadE6_922_from_start	sense fadE6 922	fadE6	2.81524	2.81341	0.240485
MamA	antisense_Rv0276_70_from_start	antisense Rv0276 70	Rv0276	2.57065	2.55361	0.220967
MamA	sense_Rv0276_73_from_start	sense Rv0276 73	Rv0276	3.13507	3.1594	0.252174
MamA	sense_Rv0278c_1017_to_stop	sense Rv0278c 1856	Rv0278c	1.90812	1.87066	0.257068
MamA	antisense_Rv0278c_1020_to_stop	antisense Rv0278c 1853	Rv0278c	3.14717	3.12831	0.266022
MamA	sense_Rv0278c_1302_to_stop	sense Rv0278c 1571	Rv0278c	2.34768	2.30822	0.250955
MamA	antisense_Rv0278c_1305_to_stop	antisense Rv0278c 1568	Rv0278c	3.17491	3.11705	0.260809
MamA	antisense_PPE3_15_to_stop	sense PPE3 1595	PPE3	2.77292	2.77096	0.245479
MamA	sense_PPE3_12_to_stop	antisense PPE3 1598	PPE3	2.46069	2.45226	0.253712
MamA	antisense_eccB3_186_to_stop	antisense eccB3 1430	eccB3	2.9884	2.97989	0.248647
MamA	sense_eccB3_183_to_stop	sense eccB3 1433	eccB3	2.47549	2.44406	0.258284
MamB	antisense_Rv0281_442_to_stop	sense Rv0281 466	Rv0281	2.7456	2.74678	0.243189
MamA	antisense_eccC3_757_from_start	sense eccC3 757	eccC3	2.52607	2.5087	0.320055
MamA	sense_eccC3_760_from_start	antisense eccC3 760	eccC3	2.72112	2.72261	0.243827
MamA	antisense_eccA3_673_from_start	sense eccA3 673	eccA3	2.37353	2.39258	0.251361
MamA	sense_eccA3_676_from_start	antisense eccA3 676	eccA3	2.77483	2.78175	0.19519
MamA	antisense_eccB3_610_from_start	sense eccB3 610	eccB3	3.25187	3.27405	0.257269
MamA	sense_eccB3_613_from_start	antisense eccB3 613	eccB3	3.00829	2.99848	0.235326
MamA	antisense_eccB3_449_to_stop	antisense eccB3 1167	eccB3	2.89796	2.90508	0.221444
MamA	sense_eccB3_446_to_stop	sense eccB3 1170	eccB3	3.33469	3.30957	0.279457
HsdM	sense_eccC3_1054_from_start	sense eccC3 1054	eccC3	3.00379	2.97858	0.206509
HsdM	antisense_eccC3_1061_from_start	antisense eccC3 1061	eccC3	2.70055	2.68966	0.255652
MamB	antisense_eccC3_1675_from_start	antisense eccC3 1675	eccC3	3.12518	3.10107	0.27349
MamA	antisense_eccC3_891_to_stop	antisense eccC3 3101	eccC3	3.14472	3.11736	0.250631
MamA	sense_eccC3_888_to_stop	sense eccC3 3104	eccC3	2.71305	2.63612	0.316713
MamA	antisense_PPE4_99_from_start	sense PPE4 99	PPE4	2.36365	2.35056	0.239776
MamA	sense_PPE4_102_from_start	sense PPE4 102	PPE4	3.03028	3.03203	0.250592
MamA	antisense_eccD3_481_to_stop	sense eccD3 937	eccD3	3.27681	3.28331	0.256503
MamA	sense_eccD3_478_to_stop	antisense eccD3 940	eccD3	2.73002	2.72821	0.219258
MamA	antisense_eccE3_280_to_stop	sense eccE3 715	eccE3	3.22123	3.1831	0.310358
MamA	sense_eccE3_277_to_stop	antisense eccE3 718	eccE3	1.88583	1.9304	0.27718
HsdM	antisense_Rv0293c_546_from_start	sense Rv0293c 546	Rv0293c	2.79731	2.74465	0.23904
HsdM	sense_Rv0293c_539_from_start	antisense Rv0293c 539	Rv0293c	2.59053	2.58529	0.22232
MamB	antisense_Rv0298_103_to_stop	sense Rv0298 124	Rv0298	2.39941	2.4148	0.252105
MamA	12_up_of_Rv0296c	intergenic none NA	none	2.46132	2.47427	0.222121
MamA	15_up_of_Rv0296c	intergenic none NA	none	2.55325	2.54249	0.272824
MamA	antisense_Rv0302_13_to_stop	sense Rv0302 619	Rv0302	2.84451	2.83275	0.173359
MamA	sense_Rv0302_10_to_stop	antisense Rv0302 622	Rv0302	2.58418	2.61912	0.254409
HsdM	antisense_PPE5_2398_from_start	sense PPE5 2398	PPE5	1.93487	1.95477	0.242261
HsdM	sense_PPE5_2391_from_start	antisense PPE5 2391	PPE5	1.46694	1.47807	0.169635
MamA	sense_PPE6_2843_from_start	antisense PPE6 2843	PPE6	2.3522	2.35342	0.202571
MamA	antisense_PPE6_2840_from_start	sense PPE6 2840	PPE6	2.57885	2.60724	0.258246
HsdM	antisense_PPE6_2602_from_start	sense PPE6 2602	PPE6	2.52932	2.48649	0.327909
MamA	sense_PPE5_2434_from_start	antisense PPE5 2434	PPE5	2.45014	2.44258	0.23816
MamA	antisense_PPE5_2431_from_start	sense PPE5 2431	PPE5	2.66499	2.67243	0.30786
HsdM	sense_PPE6_2595_from_start	antisense PPE6 2595	PPE6	1.95832	1.92852	0.32124
MamA	sense_PPE6_470_from_start	antisense PPE6 470	PPE6	3.26053	3.27479	0.279672
MamA	antisense_PPE6_467_from_start	sense PPE6 467	PPE6	3.45329	3.46588	0.253267
MamA	sense_PPE6_1148_from_start	antisense PPE6 1148	PPE6	1.44023	1.45906	0.260091
MamA	antisense_PPE6_1145_from_start	sense PPE6 1145	PPE6	2.41325	2.42606	0.21109
MamB	antisense_Rv0308_158_from_start	antisense Rv0308 158	Rv0308	2.47988	2.49055	0.237334
MamA	antisense_Rv0311_331_to_stop	sense Rv0311 898	Rv0311	3.36863	3.36804	0.209703
MamA	sense_Rv0311_328_to_stop	antisense Rv0311 901	Rv0311	3.33922	3.31403	0.27714
MamB	antisense_glpQ2_218_to_stop	antisense glpQ2 552	glpQ2	2.84438	2.85733	0.238071
MamA	sense_Rv0314c_43_from_start	antisense Rv0314c 43	Rv0314c	2.82513	2.81702	0.237022
MamA	antisense_Rv0314c_40_from_start	sense Rv0314c 40	Rv0314c	2.43347	2.41311	0.231823
MamA	antisense_Rv0316_199_from_start	antisense Rv0316 199	Rv0316	2.74482	2.7602	0.226843
MamA	sense_Rv0316_202_from_start	sense Rv0316 202	Rv0316	3.19417	3.19765	0.314863
HsdM	sense_Rv0320_97_from_start	antisense Rv0320 97	Rv0320	2.56625	2.5731	0.206405
HsdM	antisense_Rv0320_104_from_start	antisense Rv0320 104	Rv0320	2.29691	2.33456	0.236355
MamA	antisense_dcd_253_from_start	antisense dcd 253	dcd	3.07823	3.10039	0.202385
MamA	sense_dcd_256_from_start	sense dcd 256	dcd	3.15995	3.13536	0.206337
MamA	antisense_dcd_190_to_stop	sense dcd 382	dcd	2.89771	2.89519	0.214998
MamA	sense_dcd_187_to_stop	antisense dcd 385	dcd	3.40335	3.43918	0.230442
MamB	antisense_udgA_463_to_stop	sense udgA 868	udgA	2.83382	2.80219	0.215327
MamA	antisense_rmlA_151_to_stop	sense rmlA 715	rmlA	2.35121	2.30739	0.265173
MamA	sense_rmlA_148_to_stop	antisense rmlA 718	rmlA	3.0012	3.02064	0.331734
MamA	sense_Rv0330c_350_from_start	antisense Rv0330c 350	Rv0330c	3.08418	3.03818	0.253648
MamA	antisense_Rv0330c_347_from_start	sense Rv0330c 347	Rv0330c	3.10487	3.10717	0.235383
MamB	antisense_Rv0331_409_from_start	antisense Rv0331 409	Rv0331	3.46297	3.47808	0.236409
MamA	antisense_Rv0332_52_from_start	antisense Rv0332 52	Rv0332	2.58971	2.59644	0.227045
MamA	sense_Rv0332_55_from_start	sense Rv0332 55	Rv0332	3.41914	3.36247	0.244369
MamA	antisense_Rv0332_126_from_start	antisense Rv0332 126	Rv0332	3.12416	3.12979	0.194646
MamA	sense_Rv0332_129_from_start	sense Rv0332 129	Rv0332	3.1848	3.17713	0.257901
MamB	sense_Rv0332_222_from_start	sense Rv0332 222	Rv0332	3.07859	3.09252	0.246303
MamA	antisense_Rv0332_301_to_stop	sense Rv0332 484	Rv0332	3.05086	3.03972	0.202765
MamA	sense_Rv0332_298_to_stop	antisense Rv0332 487	Rv0332	3.21562	3.20083	0.200101
MamB	antisense_Rv0332_124_to_stop	sense Rv0332 661	Rv0332	2.81511	2.83444	0.218128
MamA	antisense_rmlA_400_to_stop	sense rmlA 466	rmlA	2.35983	2.36748	0.266015
MamA	sense_rmlA_397_to_stop	antisense rmlA 469	rmlA	2.90618	2.88958	0.268014
MamA	antisense_rmlA_22_to_stop	sense rmlA 844	rmlA	2.03535	2.04092	0.559686
MamA	sense_rmlA_19_to_stop	antisense rmlA 847	rmlA	1.67344	1.63626	0.465544
MamA	sense_Rv0338c_1312_from_start	antisense Rv0338c 1312	Rv0338c	3.0782	3.05503	0.207544
MamA	antisense_Rv0338c_1309_from_start	sense Rv0338c 1309	Rv0338c	2.25216	2.31888	0.257443
MamA	antisense_iniB_435_to_stop	antisense iniB 1004	iniB	3.25401	3.26635	0.211521
MamA	sense_iniB_432_to_stop	sense iniB 1007	iniB	1.98705	2.01136	0.255317
MamA	sense_Rv0339c_603_to_stop	antisense Rv0339c 1895	Rv0339c	2.43782	2.43989	0.210058
MamA	antisense_Rv0339c_606_to_stop	sense Rv0339c 1892	Rv0339c	3.37035	3.33868	0.227961
MamB	sense_Rv0339c_1142_from_start	antisense Rv0339c 1142	Rv0339c	3.12805	3.13348	0.226742
MamA	antisense_iniC_472_to_stop	antisense iniC 1009	iniC	3.21343	3.1974	0.218675
MamA	sense_iniC_469_to_stop	sense iniC 1012	iniC	3.24934	3.28361	0.232988
HsdM	antisense_ansP2_115_to_stop	antisense ansP2 1348	ansP2	2.59046	2.59135	0.214785
HsdM	sense_ansP2_122_to_stop	sense ansP2 1341	ansP2	2.55813	2.5581	0.210149
MamA	sense_ansP2_484_from_start	antisense ansP2 484	ansP2	2.52547	2.50936	0.255787
MamA	antisense_ansP2_481_from_start	sense ansP2 481	ansP2	3.29884	3.32142	0.272231
MamA	antisense_Rv0347_214_to_stop	sense Rv0347 772	Rv0347	2.75216	2.73703	0.253683
MamA	sense_Rv0347_211_to_stop	antisense Rv0347 775	Rv0347	2.90489	2.90412	0.23239
MamA	antisense_Rv0348_193_from_start	antisense Rv0348 193	Rv0348	3.49554	3.49636	0.285949
MamA	sense_Rv0348_196_from_start	sense Rv0348 196	Rv0348	2.7782	2.80793	0.219547
MamA	antisense_Rv0348_318_to_stop	sense Rv0348 335	Rv0348	3.01861	3.03337	0.24066
MamA	sense_Rv0348_315_to_stop	antisense Rv0348 338	Rv0348	2.24606	2.16547	0.278089
MamA	antisense_Rv0348_175_to_stop	sense Rv0348 478	Rv0348	2.95443	2.94405	0.180078
MamA	sense_Rv0348_172_to_stop	antisense Rv0348 481	Rv0348	2.95972	2.92273	0.249804
MamA	antisense_Rv0349_10_from_start	antisense Rv0349 10	Rv0349	3.32842	3.31052	0.211751
MamA	sense_Rv0349_13_from_start	sense Rv0349 13	Rv0349	2.98285	2.95316	0.232432
MamA	antisense_Rv0349_130_from_start	antisense Rv0349 130	Rv0349	3.01214	2.99696	0.202551
MamA	sense_Rv0349_133_from_start	sense Rv0349 133	Rv0349	2.91178	2.9177	0.286023
MamB	antisense_dnaJ1_181_to_stop	antisense dnaJ1 1006	dnaJ1	2.97275	2.98639	0.253561
MamA	antisense_dnaK_96_from_start	sense dnaK 96	dnaK	3.11366	3.1404	0.27707
MamA	sense_dnaK_99_from_start	antisense dnaK 99	dnaK	3.01443	3.00932	0.231274
MamA	antisense_dnaK_541_from_start	sense dnaK 541	dnaK	3.09556	3.07536	0.267188
MamA	sense_dnaK_544_from_start	antisense dnaK 544	dnaK	2.67942	2.65002	0.239593
MamA	antisense_grpE_118_to_stop	sense grpE 589	grpE	2.80871	2.80726	0.218169
MamA	sense_grpE_115_to_stop	antisense grpE 592	grpE	2.49817	2.53659	0.225378
HsdM	sense_dnaJ1_366_from_start	sense dnaJ1 366	dnaJ1	2.39027	2.35677	0.218911
HsdM	antisense_dnaJ1_373_from_start	antisense dnaJ1 373	dnaJ1	2.66636	2.66173	0.285419
MamA	antisense_dnaJ1_448_from_start	antisense dnaJ1 448	dnaJ1	2.57712	2.58157	0.207706
MamA	sense_dnaJ1_451_from_start	sense dnaJ1 451	dnaJ1	2.52161	2.52964	0.214526
MamA	sense_PPE8_2710_from_start	antisense PPE8 2710	PPE8	2.7185	2.72711	0.238212
MamA	antisense_PPE8_2707_from_start	sense PPE8 2707	PPE8	2.77838	2.81817	0.251311
MamA	sense_purA_637_from_start	antisense purA 637	purA	2.64475	2.65864	0.221887
MamA	antisense_purA_634_from_start	sense purA 634	purA	2.66945	2.67203	0.233655
MamA	sense_purA_574_from_start	antisense purA 574	purA	3.40154	3.38619	0.310094
MamA	antisense_purA_571_from_start	sense purA 571	purA	3.10142	3.08982	0.256273
HsdM	antisense_purA_436_from_start	sense purA 436	purA	2.61368	2.61339	0.20134
HsdM	sense_purA_429_from_start	antisense purA 429	purA	2.70289	2.67691	0.248551
MamA	antisense_Rv0359_208_to_stop	sense Rv0359 571	Rv0359	2.73856	2.71569	0.224945
MamA	sense_Rv0359_205_to_stop	antisense Rv0359 574	Rv0359	3.22061	3.22181	0.206787
MamA	antisense_Rv0359_17_to_stop	sense Rv0359 762	Rv0359	2.69547	2.70007	0.261598
MamA	sense_Rv0359_14_to_stop	antisense Rv0359 765	Rv0359	2.60272	2.62588	0.197983
MamA	antisense_Rv0361_11_to_stop	sense Rv0361 816	Rv0361	2.81593	2.78374	0.24233
MamA	sense_Rv0361_8_to_stop	antisense Rv0361 819	Rv0361	3.22339	3.22525	0.228856
MamA	antisense_mgtE_355_from_start	sense mgtE 355	mgtE	3.0683	3.06649	0.261421
MamA	sense_mgtE_358_from_start	antisense mgtE 358	mgtE	2.51912	2.52576	0.261116
MamB	antisense_mgtE_373_from_start	sense mgtE 373	mgtE	3.09428	3.10175	0.224595
MamA	sense_Rv0366c_23_to_stop	sense Rv0366c 570	Rv0366c	2.5239	2.51886	0.203461
MamA	antisense_Rv0366c_26_to_stop	antisense Rv0366c 567	Rv0366c	3.13001	3.14088	0.217835
MamA	sense_Rv0367c_178_to_stop	sense Rv0367c 211	Rv0367c	2.82297	2.84227	0.20961
MamA	antisense_Rv0367c_181_to_stop	antisense Rv0367c 208	Rv0367c	3.20933	3.21849	0.277834
HsdM	antisense_Rv0368c_301_to_stop	antisense Rv0368c 910	Rv0368c	2.60625	2.62088	0.245341
HsdM	sense_Rv0368c_308_to_stop	sense Rv0368c 903	Rv0368c	2.58887	2.60572	0.238626
MamA	sense_Rv0368c_526_from_start	antisense Rv0368c 526	Rv0368c	2.28699	2.31523	0.307825
MamA	antisense_Rv0368c_523_from_start	sense Rv0368c 523	Rv0368c	3.13163	3.09195	0.232371
MamA	sense_Rv0369c_8_from_start	sense Rv0369c 8	Rv0369c	3.23934	3.24703	0.254003
MamA	antisense_Rv0369c_5_from_start	sense Rv0369c 5	Rv0369c	2.07268	2.09823	0.281144
MamA	16_up_of_Rv0369c	intergenic none NA	none	3.20552	3.17798	0.221774
MamA	19_up_of_Rv0369c	intergenic none NA	none	1.80144	1.84788	0.257514
MamA	35_up_of_Rv0369c	intergenic none NA	none	3.30321	3.30588	0.210845
MamA	38_up_of_Rv0369c	intergenic none NA	none	2.64306	2.59339	0.243916
MamA	sense_Rv0370c_445_to_stop	sense Rv0370c 451	Rv0370c	2.35384	2.33822	0.294648
MamA	antisense_Rv0370c_448_from_start	sense Rv0370c 448	Rv0370c	3.07759	3.00351	0.297911
MamA	sense_Rv0370c_392_from_start	antisense Rv0370c 392	Rv0370c	2.18999	2.21527	0.428555
MamA	antisense_Rv0370c_389_from_start	sense Rv0370c 389	Rv0370c	1.42603	1.35244	0.301604
MamB	antisense_Rv0371c_65_to_stop	sense Rv0371c 528	Rv0371c	3.09716	3.06702	0.270406
MamA	sense_Rv0372c_310_from_start	antisense Rv0372c 310	Rv0372c	2.42007	2.4749	0.280086
MamA	antisense_Rv0372c_307_from_start	sense Rv0372c 307	Rv0372c	2.66948	2.6536	0.183302
MamA	antisense_Rv0377_277_to_stop	sense Rv0377 688	Rv0377	3.19228	3.17787	0.225579
MamA	sense_Rv0377_274_to_stop	antisense Rv0377 691	Rv0377	2.91528	2.90248	0.224428
MamA	sense_Rv0373c_499_from_start	sense Rv0373c 499	Rv0373c	2.22112	2.18703	0.280771
MamA	antisense_Rv0373c_496_from_start	antisense Rv0373c 496	Rv0373c	2.64058	2.56072	0.312411
MamA	sense_Rv0380c_202_to_stop	sense Rv0380c 349	Rv0380c	3.42333	3.38359	0.280563
MamA	antisense_Rv0380c_205_to_stop	antisense Rv0380c 346	Rv0380c	3.0462	3.05478	0.260946
MamA	sense_Rv0375c_347_to_stop	sense Rv0375c 513	Rv0375c	2.2119	2.24613	0.543829
MamA	antisense_Rv0375c_350_to_stop	antisense Rv0375c 510	Rv0375c	1.55425	1.52909	0.343835
MamB	antisense_Rv0376c_344_to_stop	antisense Rv0376c 798	Rv0376c	2.87355	2.84376	0.270052
MamB	antisense_Rv0376c_135_from_start	antisense Rv0376c 135	Rv0376c	3.17515	3.18918	0.219192
MamA	antisense_Rv0377_288_from_start	antisense Rv0377 288	Rv0377	2.25766	2.25312	0.23492
MamA	sense_Rv0377_291_from_start	sense Rv0377 291	Rv0377	2.99874	2.9667	0.254035
MamB	115_down_of_Rv0377	intergenic none NA	none	2.82925	2.83326	0.237095
MamA	antisense_Rv0378_90_to_stop	antisense Rv0378 131	Rv0378	3.05427	3.09029	0.211309
MamA	sense_Rv0378_87_to_stop	sense Rv0378 134	Rv0378	3.31355	3.30681	0.241634
MamA	60_up_of_Rv0378	intergenic none NA	none	3.15585	3.14336	0.238503
MamA	57_up_of_Rv0378	intergenic none NA	none	3.17332	3.18646	0.315592
MamA	sense_Rv0380c_268_to_stop	sense Rv0380c 283	Rv0380c	2.08685	2.07197	0.201658
MamA	antisense_Rv0380c_271_to_stop	antisense Rv0380c 280	Rv0380c	3.1323	3.12877	0.202541
MamA	sense_Rv0381c_268_to_stop	sense Rv0381c 640	Rv0381c	2.4407	2.44226	0.218579
MamA	antisense_Rv0381c_271_to_stop	antisense Rv0381c 637	Rv0381c	3.09412	3.09094	0.226057
MamB	sense_metZ_490_from_start	sense metZ 490	metZ	2.42066	2.37082	0.225048
MamA	sense_ndhA_250_to_stop	antisense ndhA 1162	ndhA	2.61633	2.62408	0.260418
MamA	antisense_ndhA_253_to_stop	sense ndhA 1159	ndhA	3.07543	3.05125	0.265173
MamA	sense_PPE9_63_from_start	sense PPE9 63	PPE9	2.40945	2.35572	0.222613
MamA	antisense_PPE9_60_from_start	antisense PPE9 60	PPE9	2.98446	3.03826	0.243628
MamB	37_up_of_PPE9	intergenic none NA	none	3.00922	3.01345	0.257524
MamA	sense_Rv0394c_54_to_stop	sense Rv0394c 665	Rv0394c	2.43847	2.4665	0.221423
MamA	antisense_Rv0394c_57_to_stop	antisense Rv0394c 662	Rv0394c	1.85906	1.86773	0.313061
MamB	antisense_Rv0395_183_from_start	antisense Rv0395 183	Rv0395	3.13449	3.15842	0.259031
MamA	sense_ndhA_436_from_start	antisense ndhA 436	ndhA	3.42878	3.42702	0.222521
MamA	antisense_ndhA_433_from_start	sense ndhA 433	ndhA	3.07381	3.07882	0.278326
MamA	sense_fadE7_280_from_start	antisense fadE7 280	fadE7	2.54699	2.53457	0.237019
MamA	antisense_fadE7_277_from_start	sense fadE7 277	fadE7	2.84054	2.83645	0.305137
MamA	sense_fadE7_85_to_stop	antisense fadE7 1102	fadE7	2.50622	2.47175	0.305873
MamA	antisense_fadE7_88_to_stop	sense fadE7 1099	fadE7	2.79581	2.75563	0.276266
MamA	sense_fadE7_118_to_stop	antisense fadE7 1069	fadE7	1.10318	1.11346	0.382834
MamA	antisense_fadE7_121_to_stop	sense fadE7 1066	fadE7	1.62084	1.56505	0.586883
MamA	antisense_fadD30_489_from_start	sense fadD30 489	fadD30	2.74277	2.72876	0.192325
MamA	sense_fadD30_492_from_start	antisense fadD30 492	fadD30	2.32399	2.34631	0.232583
MamA	sense_mmpL1_253_from_start	antisense mmpL1 253	mmpL1	2.5298	2.52897	0.160621
MamA	antisense_mmpL1_250_from_start	sense mmpL1 250	mmpL1	2.82704	2.8016	0.317864
HsdM	sense_fgd1_281_from_start	sense fgd1 281	fgd1	2.48821	2.47064	0.197662
HsdM	antisense_fgd1_288_from_start	antisense fgd1 288	fgd1	2.37103	2.35843	0.237719
MamB	antisense_fgd1_394_from_start	antisense fgd1 394	fgd1	3.16094	3.19399	0.233605
MamA	antisense_pta_574_to_stop	antisense pta 1498	pta	3.03163	3.07753	0.269225
MamA	sense_pta_571_to_stop	sense pta 1501	pta	2.78252	2.72238	0.254485
MamB	sense_ackA_357_from_start	sense ackA 357	ackA	2.74764	2.77027	0.226162
MamA	antisense_fgd1_49_to_stop	sense fgd1 961	fgd1	2.77126	2.75365	0.255644
MamA	sense_fgd1_46_to_stop	antisense fgd1 964	fgd1	3.33834	3.36085	0.217514
MamA	sense_pknG_775_from_start	sense pknG 775	pknG	2.45728	2.41148	0.206461
HsdM	sense_pta_181_to_stop	antisense pta 1891	pta	2.83355	2.8058	0.197279
HsdM	antisense_pta_174_to_stop	sense pta 1898	pta	2.77838	2.74293	0.27718
MamA	antisense_pknG_772_from_start	antisense pknG 772	pknG	3.03774	3.00218	0.247579
HsdM	sense_thiO_214_to_stop	antisense thiO 808	thiO	2.59605	2.58801	0.24536
HsdM	antisense_thiO_207_to_stop	sense thiO 815	thiO	2.55314	2.55162	0.238015
MamA	antisense_thiO_507_from_start	antisense thiO 507	thiO	2.54268	2.54824	0.257815
MamA	sense_thiO_510_from_start	sense thiO 510	thiO	2.97344	2.98576	0.26463
HsdM	antisense_thiD_330_from_start	sense thiD 330	thiD	2.75768	2.72684	0.241713
HsdM	sense_thiD_323_from_start	antisense thiD 323	thiD	2.84586	2.86353	0.254596
MamB	antisense_ctpH_2206_from_start	sense ctpH 2206	ctpH	2.88352	2.85817	0.270223
MamA	sense_thiC_622_from_start	sense thiC 622	thiC	2.76669	2.7462	0.232248
MamA	antisense_thiC_619_from_start	antisense thiC 619	thiC	2.84707	2.82819	0.306876
MamA	sense_ctpH_87_to_stop	antisense ctpH 4532	ctpH	2.79726	2.79367	0.242991
MamA	antisense_ctpH_90_to_stop	sense ctpH 4529	ctpH	3.13197	3.14102	0.257146
MamB	sense_xthA_160_to_stop	sense xthA 715	xthA	3.04865	3.04452	0.250598
MamA	sense_xthA_302_to_stop	sense xthA 573	xthA	3.17489	3.21473	0.235774
MamA	antisense_xthA_305_to_stop	antisense xthA 570	xthA	2.53201	2.49826	0.259088
MamB	antisense_xthA_400_to_stop	antisense xthA 475	xthA	3.102	3.12025	0.253539
HsdM	antisense_def_122_to_stop	antisense def 471	def	2.61231	2.54378	0.298434
HsdM	sense_def_129_to_stop	sense def 464	def	2.60305	2.59467	0.267089
MamA	sense_ctpH_1659_from_start	antisense ctpH 1659	ctpH	2.59788	2.61759	0.221694
MamA	antisense_ctpH_1656_from_start	sense ctpH 1656	ctpH	2.83055	2.77826	0.246235
MamA	sense_ctpH_1601_from_start	antisense ctpH 1601	ctpH	3.26476	3.21615	0.217529
MamA	antisense_ctpH_1598_from_start	sense ctpH 1598	ctpH	1.80924	1.81691	0.326583
MamA	antisense_Rv0433_415_to_stop	sense Rv0433 715	Rv0433	2.54838	2.53229	0.223813
MamA	sense_Rv0433_412_to_stop	antisense Rv0433 718	Rv0433	1.77405	1.7864	0.215699
MamA	sense_xthA_327_from_start	antisense xthA 327	xthA	3.14421	3.17766	0.275549
MamA	antisense_xthA_324_from_start	sense xthA 324	xthA	3.3236	3.3404	0.225599
MamA	antisense_Rv0433_163_to_stop	sense Rv0433 967	Rv0433	3.02255	3.02968	0.230846
MamA	sense_Rv0433_160_to_stop	antisense Rv0433 970	Rv0433	3.09529	3.08454	0.19868
MamA	sense_Rv0435c_1045_to_stop	sense Rv0435c 1141	Rv0435c	2.4491	2.39088	0.259211
MamA	antisense_Rv0435c_1048_to_stop	antisense Rv0435c 1138	Rv0435c	2.99452	2.9847	0.29242
MamB	sense_sodC_32_from_start	sense sodC 32	sodC	2.94723	2.95297	0.282677
HsdM	antisense_moeA2_325_to_stop	antisense moeA2 892	moeA2	2.50935	2.50046	0.261227
HsdM	sense_moeA2_332_to_stop	sense moeA2 885	moeA2	2.67632	2.68008	0.235049
MamB	sense_Rv0439c_151_to_stop	sense Rv0439c 784	Rv0439c	2.42433	2.44814	0.237667
MamA	antisense_groEL2_181_from_start	sense groEL2 181	groEL2	3.21744	3.24112	0.240674
MamA	sense_groEL2_184_from_start	antisense groEL2 184	groEL2	2.72462	2.66762	0.222503
MamA	antisense_groEL2_637_from_start	antisense groEL2 637	groEL2	2.7249	2.72849	0.201869
MamA	sense_groEL2_640_from_start	sense groEL2 640	groEL2	2.77819	2.73697	0.197616
MamA	antisense_groEL2_703_to_stop	sense groEL2 919	groEL2	3.13406	3.09248	0.258127
MamA	sense_groEL2_700_to_stop	antisense groEL2 922	groEL2	2.87088	2.90904	0.220542
MamA	antisense_groEL2_292_to_stop	antisense groEL2 1330	groEL2	3.09511	3.12298	0.228896
MamA	sense_groEL2_289_to_stop	sense groEL2 1333	groEL2	2.20535	2.1803	0.199558
MamA	antisense_groEL2_253_to_stop	antisense groEL2 1369	groEL2	2.90909	2.95378	0.214749
MamA	sense_groEL2_250_to_stop	sense groEL2 1372	groEL2	3.09065	3.10311	0.220013
MamB	antisense_Rv0441c_23_to_stop	antisense Rv0441c 405	Rv0441c	2.60701	2.63044	0.222487
MamB	antisense_Rv0439c_178_to_stop	antisense Rv0439c 757	Rv0439c	2.4669	2.47202	0.234049
MamB	sense_sigK_142_to_stop	sense sigK 421	sigK	3.02855	3.01541	0.256483
MamB	antisense_sigK_133_from_start	sense sigK 133	sigK	3.01921	3.01408	0.231748
MamB	sense_ufaA1_256_to_stop	antisense ufaA1 1027	ufaA1	2.62178	2.63584	0.245412
MamB	antisense_Rv0448c_148_from_start	sense Rv0448c 148	Rv0448c	2.85748	2.85407	0.223508
MamB	antisense_Rv0449c_433_from_start	sense Rv0449c 433	Rv0449c	3.1609	3.16229	0.270645
HsdM	antisense_Rv0446c_290_to_stop	antisense Rv0446c 480	Rv0446c	2.66313	2.66734	0.368829
HsdM	sense_Rv0446c_297_to_stop	sense Rv0446c 473	Rv0446c	2.60906	2.54554	0.358083
MamB	antisense_Rv0448c_145_to_stop	antisense Rv0448c 520	Rv0448c	2.87007	2.90209	0.229971
MamA	71_up_of_Rv0452	intergenic none NA	none	2.06255	2.03899	0.388404
MamA	68_up_of_Rv0452	intergenic none NA	none	2.79962	2.75797	0.24733
MamA	antisense_Rv0452_109_from_start	antisense Rv0452 109	Rv0452	3.10237	3.05494	0.23448
MamA	antisense_PPE11_280_from_start	sense PPE11 280	PPE11	3.04178	3.05852	0.215895
MamA	sense_PPE11_283_from_start	antisense PPE11 283	PPE11	2.64163	2.64276	0.23072
MamA	sense_mmpL4_1184_to_stop	sense mmpL4 1719	mmpL4	0.130761	0.148413	0.303182
MamA	antisense_mmpL4_1187_to_stop	antisense mmpL4 1716	mmpL4	0.433765	0.438349	0.343363
MamA	antisense_Rv0454_116_to_stop	sense Rv0454 234	Rv0454	3.22397	3.22738	0.223791
MamA	sense_Rv0454_113_to_stop	antisense Rv0454 237	Rv0454	2.59559	2.61705	0.192023
MamA	sense_Rv0452_112_from_start	sense Rv0452 112	Rv0452	2.68086	2.69633	0.2233
HsdM	antisense_mazE1_27_from_start	antisense mazE1 27	mazE1	2.29819	2.28544	0.2814
HsdM	sense_mazE1_20_from_start	sense mazE1 20	mazE1	2.19346	2.18799	0.248523
MamB	sense_Rv0457c_538_to_stop	antisense Rv0457c 1483	Rv0457c	2.84237	2.81885	0.200865
MamA	sense_Rv0457c_875_to_stop	antisense Rv0457c 1146	Rv0457c	2.58737	2.59163	0.22903
MamA	antisense_Rv0457c_878_to_stop	sense Rv0457c 1143	Rv0457c	2.60274	2.59009	0.225329
MamB	antisense_Rv0455c_22_from_start	sense Rv0455c 22	Rv0455c	2.81486	2.80501	0.277011
MamA	antisense_Rv0458_687_from_start	antisense Rv0458 687	Rv0458	2.7208	2.75423	0.218571
MamA	sense_Rv0458_690_from_start	sense Rv0458 690	Rv0458	2.71192	2.71202	0.235723
MamA	antisense_Rv0458_568_to_stop	sense Rv0458 955	Rv0458	2.80915	2.78384	0.207277
MamA	sense_Rv0458_565_to_stop	antisense Rv0458 958	Rv0458	2.95477	2.95345	0.213651
MamA	sense_Rv0465c_386_to_stop	antisense Rv0465c 1038	Rv0465c	3.02933	3.01675	0.204056
MamA	antisense_Rv0465c_389_to_stop	sense Rv0465c 1035	Rv0465c	2.7399	2.7738	0.250336
MamA	sense_Rv0465c_85_from_start	sense Rv0465c 85	Rv0465c	2.36933	2.3445	0.241062
MamA	antisense_Rv0465c_82_from_start	antisense Rv0465c 82	Rv0465c	3.11931	3.13296	0.232201
MamA	antisense_Rv0466_136_to_stop	sense Rv0466 658	Rv0466	3.37517	3.37995	0.264284
MamA	sense_Rv0466_133_to_stop	antisense Rv0466 661	Rv0466	2.86082	2.85325	0.224786
MamA	antisense_fadB2_154_from_start	antisense fadB2 154	fadB2	2.93543	2.92819	0.220752
MamA	sense_fadB2_157_from_start	sense fadB2 157	fadB2	3.07811	3.10093	0.230467
MamA	antisense_fadB2_363_from_start	antisense fadB2 363	fadB2	1.92769	1.91836	0.224982
MamA	sense_fadB2_366_from_start	sense fadB2 366	fadB2	3.10167	3.11387	0.259414
MamA	sense_Rv0465c_646_from_start	antisense Rv0465c 646	Rv0465c	2.74779	2.73269	0.207136
MamA	antisense_Rv0465c_643_from_start	sense Rv0465c 643	Rv0465c	3.08774	3.10688	0.239515
MamA	sense_pcaA_361_from_start	antisense pcaA 361	pcaA	2.44431	2.43457	0.207817
MamA	antisense_pcaA_358_from_start	sense pcaA 358	pcaA	3.30028	3.31277	0.253832
MamA	sense_pcaA_345_from_start	antisense pcaA 345	pcaA	2.62771	2.60874	0.24586
MamA	antisense_pcaA_342_from_start	sense pcaA 342	pcaA	2.75627	2.72285	0.22977
MamA	antisense_icl1_112_from_start	antisense icl1 112	icl1	2.55594	2.63207	0.238488
MamA	sense_icl1_115_from_start	sense icl1 115	icl1	2.67508	2.65177	0.208188
HsdM	antisense_Rv0471c_210_to_stop	antisense Rv0471c 278	Rv0471c	2.24656	2.25698	0.232364
HsdM	sense_Rv0471c_217_to_stop	sense Rv0471c 271	Rv0471c	2.40074	2.41335	0.228088
MamB	sense_Rv0472c_241_from_start	antisense Rv0472c 241	Rv0472c	2.88562	2.87719	0.216317
MamB	antisense_Rv0473_457_from_start	antisense Rv0473 457	Rv0473	3.22498	3.23714	0.230637
MamB	antisense_Rv0473_568_from_start	antisense Rv0473 568	Rv0473	3.14583	3.14939	0.216233
MamB	antisense_hbhA_211_from_start	antisense hbhA 211	hbhA	3.16979	3.16719	0.23877
MamA	antisense_umaA_136_to_stop	sense umaA 724	umaA	2.70461	2.66698	0.341863
MamA	sense_umaA_133_to_stop	antisense umaA 727	umaA	2.63117	2.63958	0.360169
MamA	sense_Rv0472c_98_to_stop	antisense Rv0472c 606	Rv0472c	3.11858	3.11007	0.243483
MamA	antisense_Rv0472c_101_to_stop	antisense Rv0472c 603	Rv0472c	3.27917	3.26622	0.296471
MamB	antisense_deoC_129_from_start	antisense deoC 129	deoC	2.708	2.68374	0.229577
MamA	sense_Rv0479c_137_to_stop	sense Rv0479c 909	Rv0479c	3.17898	3.15128	0.230676
MamA	antisense_Rv0479c_140_to_stop	antisense Rv0479c 906	Rv0479c	2.43524	2.45679	0.257213
MamB	antisense_Rv0473_235_to_stop	antisense Rv0473 1135	Rv0473	2.55033	2.572	0.248444
MamA	84_up_of_hbhA	intergenic none NA	none	2.433	2.43517	0.242426
MamA	81_up_of_hbhA	intergenic none NA	none	2.68512	2.69068	0.185988
MamB	antisense_hbhA_103_from_start	antisense hbhA 103	hbhA	2.62057	2.63135	0.222853
HsdM	sense_Rv0476_73_from_start	antisense Rv0476 73	Rv0476	2.36998	2.32546	0.231977
HsdM	antisense_Rv0476_80_from_start	sense Rv0476 80	Rv0476	2.30506	2.29898	0.237413
MamA	antisense_murB_353_to_stop	sense murB 756	murB	1.99824	1.98261	0.270929
MamA	sense_murB_350_to_stop	antisense murB 759	murB	3.21839	3.17457	0.263764
MamA	sense_Rv0484c_219_to_stop	sense Rv0484c 536	Rv0484c	2.81246	2.82992	0.243223
MamA	antisense_Rv0484c_222_to_stop	antisense Rv0484c 533	Rv0484c	2.76416	2.74839	0.26787
MamA	antisense_Rv0485_475_to_stop	sense Rv0485 841	Rv0485	3.19028	3.14719	0.275073
MamA	sense_Rv0485_472_to_stop	antisense Rv0485 844	Rv0485	2.55569	2.53526	0.180772
MamB	antisense_Rv0485_274_to_stop	antisense Rv0485 1042	Rv0485	3.13156	3.15453	0.279646
MamB	antisense_mshA_592_to_stop	sense mshA 850	mshA	3.39298	3.36127	0.260418
MamA	antisense_Rv0488_117_to_stop	sense Rv0488 488	Rv0488	2.717	2.73308	0.211986
MamA	sense_Rv0488_114_to_stop	antisense Rv0488 491	Rv0488	3.10452	3.09849	0.246642
MamA	antisense_regX3_271_from_start	antisense regX3 271	regX3	2.8457	2.87005	0.221186
MamA	sense_regX3_274_from_start	sense regX3 274	regX3	3.19074	3.13731	0.298286
MamA	antisense_regX3_292_to_stop	sense regX3 391	regX3	3.19668	3.19658	0.229563
MamA	sense_regX3_289_to_stop	antisense regX3 394	regX3	2.4531	2.44047	0.223967
MamA	sense_Rv0492c_381_to_stop	antisense Rv0492c 1508	Rv0492c	2.40625	2.36455	0.268727
MamA	antisense_Rv0492c_384_to_stop	sense Rv0492c 1505	Rv0492c	3.2257	3.21908	0.215126
MamA	sense_Rv0492c_826_from_start	sense Rv0492c 826	Rv0492c	2.73095	2.72919	0.244044
MamA	antisense_Rv0492c_823_from_start	antisense Rv0492c 823	Rv0492c	3.25827	3.23552	0.238856
MamA	antisense_Rv0494_328_from_start	antisense Rv0494 328	Rv0494	3.2171	3.18521	0.265998
MamA	sense_Rv0494_331_from_start	sense Rv0494 331	Rv0494	2.83907	2.83968	0.204316
MamA	antisense_proC_220_to_stop	sense proC 667	proC	3.09249	3.0824	0.261574
MamA	sense_proC_217_to_stop	antisense proC 670	proC	2.67403	2.70476	0.273203
MamB	antisense_Rv0496_271_from_start	antisense Rv0496 271	Rv0496	3.20667	3.20655	0.260897
HsdM	sense_Rv0497_68_to_stop	antisense Rv0497 864	Rv0497	2.45623	2.45878	0.245378
HsdM	antisense_Rv0497_61_to_stop	sense Rv0497 871	Rv0497	2.42503	2.44755	0.234407
MamB	sense_cmaA2_34_from_start	antisense cmaA2 34	cmaA2	3.52683	3.507	0.256113
MamA	sense_Rv0504c_217_from_start	antisense Rv0504c 217	Rv0504c	2.75384	2.707	0.258559
MamA	antisense_Rv0504c_214_from_start	sense Rv0504c 214	Rv0504c	3.42537	3.39642	0.223624
MamB	sense_Rv0502_452_from_start	sense Rv0502 452	Rv0502	2.54337	2.51067	0.22805
MamA	antisense_mmpL2_775_to_stop	antisense mmpL2 2131	mmpL2	2.36502	2.37844	0.360713
MamA	sense_mmpL2_772_to_stop	sense mmpL2 2134	mmpL2	2.45097	2.43375	0.285389
HsdM	sense_mmpL2_218_to_stop	antisense mmpL2 2688	mmpL2	2.42183	2.45192	0.23034
HsdM	antisense_mmpL2_211_to_stop	sense mmpL2 2695	mmpL2	2.74703	2.70131	0.274763
MamB	antisense_Rv0508_48_from_start	sense Rv0508 48	Rv0508	2.59156	2.59892	0.206778
MamB	antisense_Rv0508_58_to_stop	antisense Rv0508 235	Rv0508	3.15727	3.1629	0.237039
MamA	antisense_hemC_241_to_stop	sense hemC 688	hemC	2.57004	2.62662	0.22812
MamA	sense_hemC_238_to_stop	antisense hemC 691	hemC	2.25178	2.17895	0.302885
MamA	antisense_hemD_236_to_stop	antisense hemD 1461	hemD	2.52067	2.49386	0.272453
MamA	sense_hemD_233_to_stop	sense hemD 1464	hemD	3.24432	3.2449	0.204773
MamB	antisense_hemB_280_to_stop	sense hemB 709	hemB	3.1205	3.13358	0.236949
MamB	60_down_of_Rv0518	intergenic none NA	none	2.60243	2.61788	0.212065
MamB	antisense_Rv0520_34_to_stop	antisense Rv0520 316	Rv0520	2.72669	2.74263	0.21058
MamB	10_down_of_Rv0521	intergenic none NA	none	2.62057	2.62352	0.210522
MamA	antisense_Rv0528_183_from_start	sense Rv0528 183	Rv0528	2.81401	2.79603	0.286165
MamA	sense_Rv0528_186_from_start	antisense Rv0528 186	Rv0528	2.92277	2.95343	0.237494
MamA	antisense_Rv0530_436_to_stop	sense Rv0530 781	Rv0530	2.87984	2.88333	0.229515
MamA	sense_Rv0530_433_to_stop	antisense Rv0530 784	Rv0530	2.81839	2.7941	0.267278
MamA	antisense_Rv0530_176_to_stop	antisense Rv0530 1041	Rv0530	2.99693	2.99763	0.289197
MamA	sense_Rv0530_173_to_stop	sense Rv0530 1044	Rv0530	2.59931	2.59117	0.217938
MamB	antisense_Rv0531_31_to_stop	antisense Rv0531 286	Rv0531	3.20852	3.17988	0.231358
MamB	antisense_menA_76_to_stop	antisense menA 802	menA	2.54002	2.54881	0.243694
HsdM	antisense_menA_79_to_stop	antisense menA 799	menA	2.47415	2.44309	0.246611
HsdM	sense_menA_86_to_stop	antisense menA 792	menA	2.65057	2.6659	0.272571
MamB	sense_menA_394_to_stop	sense menA 484	menA	2.05161	2.08296	0.281297
MamB	antisense_galE3_31_to_stop	antisense galE3 1009	galE3	2.64255	2.65578	0.207054
MamA	antisense_Rv0538_183_to_stop	antisense Rv0538 1463	Rv0538	2.25194	2.24261	0.24808
MamA	sense_Rv0538_180_to_stop	sense Rv0538 1466	Rv0538	2.7663	2.75723	0.279115
MamA	antisense_Rv0539_151_to_stop	sense Rv0539 481	Rv0539	2.85577	2.86422	0.180636
MamA	sense_Rv0539_148_to_stop	antisense Rv0539 484	Rv0539	3.13626	3.13502	0.26015
MamB	7_down_of_Rv0543c	intergenic none NA	none	2.88919	2.87909	0.271137
MamA	sense_pitA_384_from_start	antisense pitA 384	pitA	3.1509	3.13297	0.265923
MamA	antisense_pitA_381_from_start	sense pitA 381	pitA	2.86551	2.84606	0.250602
MamB	antisense_pitA_367_from_start	sense pitA 367	pitA	2.57201	2.57995	0.227498
MamA	sense_pitA_238_from_start	sense pitA 238	pitA	2.37435	2.34281	0.247808
MamA	antisense_pitA_235_from_start	antisense pitA 235	pitA	3.2403	3.21301	0.227315
MamA	sense_menB_23_to_stop	sense menB 921	menB	3.11522	3.14264	0.244383
MamA	antisense_menB_26_to_stop	antisense menB 918	menB	2.50885	2.52615	0.242656
MamA	sense_menB_226_to_stop	sense menB 718	menB	2.23283	2.18092	0.367245
MamA	antisense_menB_229_to_stop	antisense menB 715	menB	3.05576	3.01857	0.307296
MamA	sense_menB_412_from_start	antisense menB 412	menB	2.36746	2.36746	0.243451
MamA	antisense_menB_409_from_start	sense menB 409	menB	3.10349	3.13798	0.216131
MamA	sense_menB_11_from_start	antisense menB 11	menB	2.03908	1.98559	0.553838
MamA	antisense_menB_8_from_start	sense menB 8	menB	1.97372	1.8656	0.478692
MamA	sense_vapC3_135_to_stop	sense vapC3 278	vapC3	3.38329	3.37854	0.266304
MamA	antisense_vapC3_138_to_stop	antisense vapC3 275	vapC3	3.30763	3.28586	0.254199
MamA	sense_vapC3_190_to_stop	sense vapC3 223	vapC3	2.92509	2.90358	0.231737
MamA	antisense_vapC3_193_to_stop	antisense vapC3 220	vapC3	2.81507	2.82918	0.249079
MamA	sense_fadD8_496_from_start	sense fadD8 496	fadD8	3.27354	3.24993	0.249819
MamA	antisense_fadD8_493_from_start	antisense fadD8 493	fadD8	3.18674	3.20512	0.257638
MamA	antisense_Rv0552_214_from_start	sense Rv0552 214	Rv0552	2.88096	2.83067	0.347699
MamA	sense_Rv0552_217_from_start	antisense Rv0552 217	Rv0552	2.41952	2.38846	0.23696
MamA	sense_menC_272_to_stop	antisense menC 699	menC	3.17698	3.17274	0.288797
MamA	antisense_bpoC_346_to_stop	sense bpoC 442	bpoC	2.66612	2.66236	0.194247
MamA	sense_bpoC_343_to_stop	antisense bpoC 445	bpoC	2.70918	2.6949	0.198226
MamA	antisense_menC_275_to_stop	sense menC 696	menC	2.78446	2.7269	0.220332
MamA	sense_Rv0561c_390_to_stop	sense Rv0561c 836	Rv0561c	1.89097	1.87223	0.215384
MamA	antisense_Rv0561c_393_to_stop	antisense Rv0561c 833	Rv0561c	2.7495	2.68441	0.376873
MamB	antisense_htpX_385_from_start	antisense htpX 385	htpX	3.16825	3.15866	0.2359
MamA	antisense_htpX_22_to_stop	sense htpX 838	htpX	3.06808	3.06317	0.203353
MamA	sense_htpX_19_to_stop	antisense htpX 841	htpX	2.4017	2.38893	0.24518
HsdM	antisense_Rv0565c_643_to_stop	antisense Rv0565c 817	Rv0565c	2.74397	2.70392	0.202537
HsdM	sense_Rv0565c_650_to_stop	sense Rv0565c 810	Rv0565c	2.50136	2.49199	0.265359
MamA	15_down_of_Rv0566c	intergenic none NA	none	2.33338	2.32271	0.203978
MamA	12_down_of_Rv0566c	intergenic none NA	none	2.79721	2.80616	0.239037
MamA	antisense_Rv0567_26_to_stop	sense Rv0567 993	Rv0567	3.03769	3.02546	0.238251
MamA	sense_Rv0567_23_to_stop	antisense Rv0567 996	Rv0567	3.00913	2.97777	0.251269
MamA	antisense_cyp135B1_591_from_start	antisense cyp135B1 591	cyp135B1	2.61993	2.63972	0.218125
MamA	sense_cyp135B1_594_from_start	sense cyp135B1 594	cyp135B1	3.27872	3.29032	0.211874
MamA	antisense_cyp135B1_598_to_stop	sense cyp135B1 820	cyp135B1	2.36924	2.29797	0.245752
MamA	sense_cyp135B1_595_to_stop	antisense cyp135B1 823	cyp135B1	2.85327	2.896	0.209897
HsdM	sense_cyp135B1_349_to_stop	sense cyp135B1 1069	cyp135B1	2.6876	2.67447	0.219666
HsdM	antisense_cyp135B1_342_to_stop	antisense cyp135B1 1076	cyp135B1	2.64674	2.64914	0.210866
MamB	antisense_nrdZ_198_from_start	sense nrdZ 198	nrdZ	2.60678	2.59258	0.195102
MamA	antisense_nrdZ_653_from_start	sense nrdZ 653	nrdZ	3.18622	3.17123	0.246088
MamA	sense_nrdZ_656_from_start	antisense nrdZ 656	nrdZ	2.37711	2.34383	0.207372
MamA	antisense_nrdZ_424_to_stop	antisense nrdZ 1654	nrdZ	3.33867	3.35115	0.275097
MamA	sense_nrdZ_421_to_stop	sense nrdZ 1657	nrdZ	2.50176	2.45382	0.217418
HsdM	160_up_of_Rv0572c	intergenic none NA	none	2.23994	2.23637	0.191419
HsdM	167_up_of_Rv0572c	intergenic none NA	none	2.48651	2.46753	0.204279
MamA	sense_pncB2_365_to_stop	antisense pncB2 1026	pncB2	3.09454	3.11216	0.2409
MamA	antisense_pncB2_368_to_stop	sense pncB2 1023	pncB2	2.72349	2.72399	0.279364
MamB	antisense_pncB2_217_from_start	antisense pncB2 217	pncB2	1.9832	1.97042	0.343011
MamA	sense_Rv0574c_37_to_stop	antisense Rv0574c 1105	Rv0574c	2.14038	2.14661	0.280834
MamA	antisense_Rv0574c_40_to_stop	sense Rv0574c 1102	Rv0574c	3.09306	3.05735	0.297158
MamA	sense_Rv0574c_256_from_start	antisense Rv0574c 256	Rv0574c	2.58317	2.57522	0.261989
MamA	antisense_Rv0574c_253_from_start	sense Rv0574c 253	Rv0574c	2.99448	2.96976	0.274349
MamB	antisense_Rv0575c_543_from_start	sense Rv0575c 543	Rv0575c	2.75122	2.72592	0.275002
MamA	antisense_Rv0576_237_from_start	sense Rv0576 237	Rv0576	2.79971	2.79957	0.238493
MamA	sense_Rv0576_240_from_start	antisense Rv0576 240	Rv0576	2.92328	2.89837	0.248555
MamA	antisense_Rv0579_118_from_start	antisense Rv0579 118	Rv0579	3.33018	3.39798	0.273612
MamA	sense_Rv0579_121_from_start	sense Rv0579 121	Rv0579	2.62084	2.58904	0.248263
MamA	antisense_Rv0579_139_to_stop	sense Rv0579 619	Rv0579	3.177	3.16534	0.271869
MamA	sense_Rv0579_136_to_stop	antisense Rv0579 622	Rv0579	3.26375	3.26249	0.274326
MamB	antisense_vapC26_178_from_start	antisense vapC26 178	vapC26	2.89751	2.88838	0.224988
MamB	sense_Rv0584_12_from_start	sense Rv0584 12	Rv0584	2.52726	2.50747	0.250323
MamA	antisense_Rv0584_1255_to_stop	sense Rv0584 1378	Rv0584	2.67242	2.69502	0.218936
MamA	sense_Rv0584_1252_to_stop	antisense Rv0584 1381	Rv0584	2.87736	2.84828	0.277401
MamA	antisense_Rv0584_1156_to_stop	sense Rv0584 1477	Rv0584	3.11856	3.1365	0.261886
MamA	sense_Rv0584_1153_to_stop	antisense Rv0584 1480	Rv0584	1.58575	1.57774	0.262429
MamA	sense_Rv0585c_157_from_start	antisense Rv0585c 157	Rv0585c	2.73787	2.72093	0.235065
MamA	antisense_Rv0585c_154_from_start	sense Rv0585c 154	Rv0585c	3.11944	3.10735	0.271635
MamB	59_up_of_mce2R	intergenic none NA	none	2.646	2.65517	0.24432
MamB	antisense_mce2R_319_to_stop	sense mce2R 403	mce2R	2.77886	2.81454	0.256381
HsdM	sense_mce2R_219_to_stop	antisense mce2R 503	mce2R	1.75412	1.65232	0.43911
HsdM	antisense_mce2R_212_to_stop	sense mce2R 510	mce2R	2.04234	1.96614	0.451433
HsdM	sense_mce2R_35_to_stop	antisense mce2R 687	mce2R	2.67816	2.66617	0.236616
HsdM	antisense_mce2R_28_to_stop	sense mce2R 694	mce2R	2.52065	2.5384	0.20753
MamA	antisense_yrbE2A_338_from_start	antisense yrbE2A 338	yrbE2A	2.90214	2.89719	0.303529
MamA	sense_yrbE2A_341_from_start	sense yrbE2A 341	yrbE2A	2.97932	2.96838	0.234667
MamA	antisense_mce2C_322_from_start	sense mce2C 322	mce2C	1.97236	1.89038	0.337704
MamA	sense_mce2C_325_from_start	antisense mce2C 325	mce2C	2.01405	2.02866	0.395564
MamA	antisense_mce2C_40_to_stop	antisense mce2C 1405	mce2C	2.68932	2.65401	0.245353
MamA	sense_mce2C_37_to_stop	sense mce2C 1408	mce2C	3.10393	3.09217	0.242076
MamA	antisense_lprL_325_from_start	antisense lprL 325	lprL	3.22132	3.21879	0.226531
MamA	sense_lprL_328_from_start	sense lprL 328	lprL	3.24632	3.23345	0.247479
MamB	antisense_Rv0597c_136_to_stop	sense Rv0597c 1099	Rv0597c	2.52408	2.55365	0.240259
MamA	sense_Rv0597c_310_to_stop	sense Rv0597c 925	Rv0597c	2.73264	2.71225	0.227743
MamA	antisense_Rv0597c_313_to_stop	antisense Rv0597c 922	Rv0597c	2.67312	2.68162	0.242468
MamA	41_down_of_vapC27	intergenic none NA	none	2.60183	2.56325	0.287627
MamA	38_down_of_vapC27	intergenic none NA	none	2.33398	2.33281	0.276403
MamA	sense_Rv0600c_53_from_start	sense Rv0600c 53	Rv0600c	2.45823	2.44824	0.234943
MamA	antisense_Rv0600c_50_from_start	antisense Rv0600c 50	Rv0600c	2.84217	2.84443	0.224762
MamA	sense_tcrA_313_to_stop	sense tcrA 448	tcrA	2.62587	2.63103	0.237687
MamA	antisense_tcrA_316_to_stop	antisense tcrA 445	tcrA	2.98975	2.94755	0.294104
MamB	antisense_Rv0606_254_to_stop	sense Rv0606 489	Rv0606	2.9891	2.99616	0.28618
HsdM	8_down_of_Rv0607	intergenic none NA	none	2.08709	2.0036	0.398268
HsdM	15_down_of_Rv0607	intergenic none NA	none	2.25366	2.19232	0.425268
MamA	sense_Rv0610c_64_to_stop	antisense Rv0610c 1093	Rv0610c	3.26604	3.23834	0.24685
MamA	antisense_Rv0610c_67_to_stop	sense Rv0610c 1090	Rv0610c	2.3682	2.34233	0.236608
MamA	sense_Rv0610c_139_to_stop	antisense Rv0610c 1018	Rv0610c	2.86028	2.83339	0.270589
MamA	antisense_Rv0610c_142_to_stop	sense Rv0610c 1015	Rv0610c	3.05913	3.08593	0.199342
MamA	antisense_Rv0612_163_to_stop	sense Rv0612 442	Rv0612	2.68832	2.68785	0.25045
MamA	sense_Rv0612_160_to_stop	antisense Rv0612 445	Rv0612	3.00014	3.06014	0.282245
MamA	antisense_Rv0613c_1261_to_stop	antisense Rv0613c 1306	Rv0613c	2.89445	2.86843	0.224988
MamA	sense_Rv0613c_1063_from_start	antisense Rv0613c 1063	Rv0613c	3.37426	3.36889	0.283582
MamA	antisense_Rv0613c_1060_from_start	sense Rv0613c 1060	Rv0613c	3.1253	3.14822	0.234847
MamA	sense_Rv0613c_433_from_start	sense Rv0613c 433	Rv0613c	3.13063	3.12594	0.271944
MamA	antisense_Rv0613c_430_from_start	antisense Rv0613c 430	Rv0613c	3.07661	3.07226	0.239253
MamA	sense_Rv0613c_1258_to_stop	sense Rv0613c 1309	Rv0613c	3.26765	3.2473	0.244659
MamB	antisense_Rv0622_9_from_start	antisense Rv0622 9	Rv0622	2.67913	2.70138	0.256418
MamA	sense_Rv0628c_238_from_start	antisense Rv0628c 238	Rv0628c	2.83818	2.84773	0.227989
MamA	antisense_Rv0628c_235_from_start	sense Rv0628c 235	Rv0628c	3.4029	3.35821	0.233731
HsdM	antisense_recD_323_from_start	antisense recD 323	recD	2.46128	2.46025	0.201527
HsdM	sense_recD_316_from_start	sense recD 316	recD	2.82069	2.8404	0.239763
MamB	antisense_recB_388_to_stop	sense recB 2896	recB	2.8633	2.83218	0.261983
HsdM	antisense_recB_936_to_stop	sense recB 2348	recB	2.62359	2.58566	0.269815
HsdM	sense_recB_943_to_stop	antisense recB 2341	recB	2.68296	2.69037	0.322783
MamA	antisense_recB_1408_from_start	sense recB 1408	recB	3.19216	3.23142	0.254488
MamB	antisense_recB_673_from_start	antisense recB 673	recB	3.10956	3.10266	0.216665
MamB	antisense_recB_316_from_start	antisense recB 316	recB	3.02699	3.02527	0.226786
MamA	sense_recB_1411_from_start	antisense recB 1411	recB	2.55955	2.58321	0.241784
MamA	sense_Rv0633c_205_to_stop	sense Rv0633c 634	Rv0633c	2.9578	2.93786	0.28897
MamA	antisense_Rv0633c_208_to_stop	antisense Rv0633c 631	Rv0633c	3.06264	3.05782	0.210241
MamA	sense_Rv0634c_283_from_start	antisense Rv0634c 283	Rv0634c	2.48448	2.42387	0.406033
MamA	antisense_Rv0634c_280_from_start	sense Rv0634c 280	Rv0634c	2.83684	2.83745	0.374207
MamB	antisense_Rv0634c_123_from_start	sense Rv0634c 123	Rv0634c	2.39866	2.37786	0.221727
MamA	antisense_rpmG2_61_to_stop	antisense rpmG2 106	rpmG2	3.03436	3.05334	0.268169
MamA	sense_rpmG2_58_to_stop	sense rpmG2 109	rpmG2	3.30742	3.32309	0.250031
MamB	antisense_hadA_6_to_stop	antisense hadA 470	hadA	3.24055	3.21397	0.252976
MamA	sense_Rv0647c_268_to_stop	antisense Rv0647c 1198	Rv0647c	3.20752	3.24771	0.232196
MamA	antisense_Rv0647c_271_to_stop	sense Rv0647c 1195	Rv0647c	2.38818	2.3611	0.216968
MamB	sense_Rv0647c_345_to_stop	antisense Rv0647c 1121	Rv0647c	3.11574	3.13638	0.25142
MamA	sense_lipG_444_from_start	antisense lipG 444	lipG	3.16371	3.15262	0.243501
MamA	antisense_lipG_441_from_start	sense lipG 441	lipG	2.97894	2.95003	0.233488
MamA	antisense_Rv0648_1237_to_stop	sense Rv0648 2943	Rv0648	2.81846	2.81881	0.263336
MamA	sense_Rv0648_1234_to_stop	antisense Rv0648 2946	Rv0648	3.24589	3.20396	0.238013
MamA	antisense_Rv0648_322_to_stop	sense Rv0648 3858	Rv0648	2.53763	2.51462	0.239634
MamA	sense_Rv0648_319_to_stop	antisense Rv0648 3861	Rv0648	2.75048	2.75405	0.257719
MamA	antisense_Rv0648_88_to_stop	antisense Rv0648 4092	Rv0648	3.17411	3.18256	0.255157
MamA	sense_Rv0648_85_to_stop	sense Rv0648 4095	Rv0648	2.94067	2.96972	0.219969
MamB	antisense_Rv0654_248_to_stop	antisense Rv0654 1257	Rv0654	2.60065	2.61388	0.223523
MamA	sense_vapB7_28_from_start	sense vapB7 28	vapB7	2.49621	2.50735	0.292848
MamA	antisense_vapB7_25_from_start	antisense vapB7 25	vapB7	3.15102	3.10535	0.27746
MamA	antisense_atsD_1000_to_stop	sense atsD 1363	atsD	3.03686	3.01053	0.230386
MamA	sense_atsD_997_to_stop	sense atsD 1366	atsD	2.37508	2.40153	0.245106
MamA	antisense_atsD_416_to_stop	antisense atsD 1947	atsD	2.94293	2.96185	0.259775
MamA	sense_atsD_413_to_stop	sense atsD 1950	atsD	3.02261	3.04293	0.262453
MamA	20_down_of_Rv0666	intergenic none NA	none	2.93461	2.91425	0.220829
MamA	23_down_of_Rv0666	intergenic none NA	none	2.87584	2.88838	0.225453
MamA	antisense_rpoB_766_from_start	sense rpoB 766	rpoB	3.02848	3.02177	0.240456
MamA	sense_rpoB_769_from_start	antisense rpoB 769	rpoB	2.75558	2.77465	0.235356
MamA	antisense_rpoB_1390_from_start	antisense rpoB 1390	rpoB	3.1597	3.11022	0.259003
MamA	sense_rpoB_1393_from_start	sense rpoB 1393	rpoB	2.3709	2.41731	0.301833
MamA	antisense_rpoB_1747_to_stop	sense rpoB 1771	rpoB	3.09194	3.12054	0.228814
MamA	sense_rpoB_1744_to_stop	antisense rpoB 1774	rpoB	3.39652	3.41255	0.276671
MamB	antisense_rpoB_1075_to_stop	sense rpoB 2443	rpoB	3.20539	3.19454	0.193919
MamA	antisense_rpoB_73_to_stop	antisense rpoB 3445	rpoB	2.2102	2.20287	0.22007
MamA	sense_rpoB_70_to_stop	sense rpoB 3448	rpoB	2.88588	2.93341	0.264369
MamA	antisense_rpoC_373_from_start	sense rpoC 373	rpoC	2.30606	2.2938	0.264481
MamA	sense_rpoC_376_from_start	antisense rpoC 376	rpoC	2.84625	2.83961	0.204587
MamA	antisense_rpoC_529_from_start	sense rpoC 529	rpoC	3.17874	3.16583	0.236965
MamA	sense_rpoC_532_from_start	antisense rpoC 532	rpoC	2.64959	2.63597	0.24365
MamA	antisense_rpoC_550_from_start	sense rpoC 550	rpoC	3.30489	3.27751	0.245708
MamA	sense_rpoC_553_from_start	antisense rpoC 553	rpoC	2.43254	2.4262	0.190878
MamA	antisense_rpoC_666_from_start	sense rpoC 666	rpoC	2.80725	2.80151	0.243903
MamA	sense_rpoC_669_from_start	antisense rpoC 669	rpoC	3.18343	3.18068	0.268422
MamA	antisense_rpoC_1345_from_start	antisense rpoC 1345	rpoC	2.96201	2.99102	0.265995
MamA	sense_rpoC_1348_from_start	sense rpoC 1348	rpoC	3.24287	3.24521	0.225592
MamA	antisense_rpoC_1411_to_stop	sense rpoC 2539	rpoC	3.04827	3.00999	0.288945
MamA	sense_rpoC_1408_to_stop	antisense rpoC 2542	rpoC	2.38503	2.34419	0.215747
HsdM	sense_rpoC_167_to_stop	antisense rpoC 3783	rpoC	2.3486	2.35074	0.215748
HsdM	antisense_rpoC_160_to_stop	sense rpoC 3790	rpoC	2.53411	2.52067	0.214831
HsdM	sense_rpoC_88_to_stop	sense rpoC 3862	rpoC	2.71085	2.72805	0.244129
HsdM	antisense_rpoC_81_to_stop	antisense rpoC 3869	rpoC	2.63846	2.62037	0.255764
MamB	antisense_Rv0669c_587_to_stop	sense Rv0669c 1326	Rv0669c	2.58441	2.57124	0.232011
MamB	sense_Rv0669c_868_from_start	sense Rv0669c 868	Rv0669c	2.94166	2.95013	0.247571
MamA	antisense_end_176_to_stop	sense end 582	end	2.76723	2.7961	0.264954
MamA	sense_end_173_to_stop	antisense end 585	end	2.72014	2.7017	0.211113
HsdM	sense_fadE8_273_from_start	antisense fadE8 273	fadE8	2.59972	2.58208	0.217638
HsdM	antisense_fadE8_280_from_start	sense fadE8 280	fadE8	2.7378	2.77202	0.259522
MamA	antisense_echA4_130_from_start	antisense echA4 130	echA4	3.0444	3.03657	0.267321
MamA	sense_echA4_133_from_start	sense echA4 133	echA4	2.41255	2.37944	0.235994
MamB	antisense_echA4_438_from_start	antisense echA4 438	echA4	2.80602	2.7848	0.221836
HsdM	sense_Rv0674_298_from_start	sense Rv0674 298	Rv0674	2.14085	2.00135	0.571718
HsdM	antisense_Rv0674_305_from_start	antisense Rv0674 305	Rv0674	2.10039	1.96723	0.530243
MamA	antisense_Rv0674_13_to_stop	sense Rv0674 709	Rv0674	3.00974	2.95832	0.234169
MamA	sense_Rv0674_10_to_stop	antisense Rv0674 712	Rv0674	1.39944	1.3844	0.312724
MamA	sense_mmpL5_1324_to_stop	sense mmpL5 1570	mmpL5	3.13922	3.14075	0.255241
MamA	antisense_mmpL5_1327_to_stop	antisense mmpL5 1567	mmpL5	3.03606	3.01971	0.248177
MamA	antisense_fadE8_448_to_stop	antisense fadE8 1180	fadE8	3.01682	2.89527	0.388706
MamA	sense_fadE8_445_to_stop	sense fadE8 1183	fadE8	2.31155	2.2784	0.267995
MamA	sense_mmpL5_286_from_start	sense mmpL5 286	mmpL5	2.72092	2.70486	0.275556
MamA	antisense_mmpL5_283_from_start	antisense mmpL5 283	mmpL5	3.22862	3.2246	0.257398
MamB	sense_rpsL_32_to_stop	antisense rpsL 342	rpsL	2.84753	2.84775	0.272839
MamA	antisense_rpsG_217_from_start	antisense rpsG 217	rpsG	2.58301	2.56709	0.229717
MamA	sense_rpsG_220_from_start	sense rpsG 220	rpsG	2.16522	2.18222	0.230618
MamA	antisense_fusA1_898_to_stop	antisense fusA1 1207	fusA1	3.21646	3.20809	0.211994
MamA	sense_fusA1_895_to_stop	sense fusA1 1210	fusA1	2.62092	2.64215	0.228757
HsdM	sense_tuf_186_from_start	antisense tuf 186	tuf	2.47641	2.44933	0.220823
HsdM	antisense_tuf_193_from_start	antisense tuf 193	tuf	2.59509	2.61405	0.250705
MamB	sense_Rv0686_373_to_stop	antisense Rv0686 424	Rv0686	3.20691	3.16273	0.272418
MamA	antisense_Rv0688_227_to_stop	sense Rv0688 993	Rv0688	2.8203	2.81359	0.265004
MamA	sense_Rv0688_224_to_stop	antisense Rv0688 996	Rv0688	1.53283	1.56619	0.342316
MamB	230_down_of_Rv0690c	intergenic none NA	none	3.10719	3.0953	0.217608
MamB	antisense_Rv0690c_328_from_start	sense Rv0690c 328	Rv0690c	2.9115	2.91299	0.258293
HsdM	sense_Rv0695_139_from_start	sense Rv0695 139	Rv0695	2.64206	2.60386	0.206714
HsdM	antisense_Rv0695_146_from_start	antisense Rv0695 146	Rv0695	2.57138	2.55143	0.205227
MamA	antisense_Rv0697_367_from_start	sense Rv0697 367	Rv0697	2.64125	2.6359	0.377403
MamA	sense_Rv0697_370_from_start	antisense Rv0697 370	Rv0697	3.07962	3.05702	0.313403
HsdM	sense_Rv0698_255_to_stop	antisense Rv0698 356	Rv0698	2.26501	2.17744	0.380656
HsdM	antisense_Rv0698_248_to_stop	sense Rv0698 363	Rv0698	2.34555	2.26937	0.416739
MamB	antisense_rplD_88_to_stop	antisense rplD 586	rplD	3.03913	3.07643	0.26661
HsdM	antisense_rplB_418_to_stop	sense rplB 424	rplB	2.66163	2.61526	0.288125
MamA	antisense_rplF_229_to_stop	sense rplF 310	rplF	2.87294	2.88672	0.206962
MamA	sense_rplF_226_to_stop	antisense rplF 313	rplF	2.59912	2.59798	0.19277
MamB	antisense_sppA_165_from_start	antisense sppA 165	sppA	3.16719	3.17292	0.240614
MamA	sense_Rv0725c_39_from_start	antisense Rv0725c 39	Rv0725c	3.14942	3.128	0.27825
MamA	antisense_Rv0725c_36_from_start	sense Rv0725c 36	Rv0725c	2.57886	2.64471	0.271113
MamB	antisense_serA2_229_to_stop	antisense serA2 751	serA2	2.68454	2.68883	0.204445
MamA	sense_serA2_464_to_stop	sense serA2 516	serA2	2.87439	2.87109	0.236366
MamA	antisense_serA2_467_to_stop	antisense serA2 513	serA2	3.36187	3.36568	0.239276
MamA	antisense_xylB_136_from_start	sense xylB 136	xylB	3.2503	3.21877	0.215696
MamA	sense_xylB_139_from_start	antisense xylB 139	xylB	3.18856	3.16314	0.221203
MamA	antisense_Rv0730_340_from_start	antisense Rv0730 340	Rv0730	2.6186	2.62194	0.19466
MamA	sense_Rv0730_343_from_start	sense Rv0730 343	Rv0730	3.36266	3.34658	0.246358
MamA	antisense_secY_142_to_stop	antisense secY 1183	secY	2.48384	2.49949	0.223332
MamA	sense_secY_139_to_stop	sense secY 1186	secY	2.58093	2.6021	0.241525
MamA	antisense_adk_214_to_stop	sense adk 331	adk	3.07911	3.04912	0.26436
MamA	sense_adk_211_to_stop	antisense adk 334	adk	2.52164	2.51182	0.225878
MamA	antisense_adk_91_to_stop	antisense adk 454	adk	3.08474	3.09207	0.281964
MamA	sense_adk_88_to_stop	sense adk 457	adk	2.62223	2.60764	0.251191
MamB	sense_rslA_277_to_stop	antisense rslA 475	rslA	3.08017	3.10374	0.232785
MamA	antisense_Rv0737_211_to_stop	sense Rv0737 286	Rv0737	3.18003	3.19163	0.211187
MamA	sense_Rv0737_208_to_stop	antisense Rv0737 289	Rv0737	2.4955	2.51697	0.223083
MamA	26_up_of_Rv0740	intergenic none NA	none	3.16725	3.15661	0.258294
MamA	23_up_of_Rv0740	intergenic none NA	none	3.39219	3.41862	0.255413
MamA	antisense_Rv0740_175_from_start	antisense Rv0740 175	Rv0740	3.03727	3.03466	0.212815
MamA	sense_Rv0740_178_from_start	sense Rv0740 178	Rv0740	2.29236	2.23604	0.246724
MamA	183_down_of_Rv0743c	intergenic none NA	none	1.96727	1.96437	0.263666
MamA	180_down_of_Rv0743c	intergenic none NA	none	2.35128	2.34988	0.287704
MamA	sense_fadE9_109_to_stop	antisense fadE9 1063	fadE9	2.70386	2.6109	0.365428
MamA	antisense_fadE9_112_to_stop	sense fadE9 1060	fadE9	2.37871	2.33244	0.38423
MamA	antisense_PE_PGRS11_419_to_stop	antisense PE_PGRS11 1335	PE_PGRS11	2.40246	2.40061	0.2349
MamA	sense_PE_PGRS11_416_to_stop	sense PE_PGRS11 1338	PE_PGRS11	3.1775	3.15593	0.256989
MamA	sense_Rv0749A_52_from_start	antisense Rv0749A 52	Rv0749A	2.59212	2.5709	0.227205
MamA	antisense_Rv0749A_49_from_start	sense Rv0749A 49	Rv0749A	2.66579	2.68116	0.220306
MamA	sense_PPE12_242_from_start	sense PPE12 242	PPE12	3.03299	2.99392	0.290347
MamA	antisense_PPE12_239_from_start	antisense PPE12 239	PPE12	3.06044	3.0537	0.279743
MamA	sense_mmsA_418_to_stop	antisense mmsA 1114	mmsA	2.55998	2.57754	0.241954
MamA	antisense_mmsA_421_to_stop	sense mmsA 1111	mmsA	2.66614	2.66417	0.25948
MamA	antisense_phoR_424_to_stop	antisense phoR 1033	phoR	2.78628	2.80674	0.235353
MamA	sense_phoR_421_to_stop	sense phoR 1036	phoR	1.84834	1.875	0.253413
MamA	sense_adhB_82_to_stop	antisense adhB 1045	adhB	3.25498	3.31641	0.279348
MamA	antisense_adhB_85_to_stop	sense adhB 1042	adhB	3.25812	3.22978	0.246516
MamB	antisense_adhB_281_to_stop	antisense adhB 846	adhB	2.14344	2.14059	0.268096
MamA	sense_Rv0763c_61_from_start	sense Rv0763c 61	Rv0763c	2.47903	2.45963	0.178098
MamA	antisense_Rv0763c_58_from_start	antisense Rv0763c 58	Rv0763c	2.89772	2.94172	0.286414
MamB	antisense_Rv0771_178_to_stop	sense Rv0771 256	Rv0771	3.22257	3.20228	0.228528
HsdM	antisense_Rv0767c_153_to_stop	antisense Rv0767c 488	Rv0767c	2.55172	2.49801	0.339853
HsdM	sense_Rv0767c_160_to_stop	sense Rv0767c 481	Rv0767c	2.77814	2.68976	0.378269
MamA	antisense_purD_373_to_stop	sense purD 895	purD	3.48198	3.43522	0.227203
MamA	sense_purD_370_to_stop	antisense purD 898	purD	2.61526	2.57211	0.259537
MamA	antisense_aldA_642_from_start	antisense aldA 642	aldA	1.21469	1.2606	0.322938
MamA	sense_aldA_645_from_start	sense aldA 645	aldA	3.11494	3.03899	0.24074
MamA	sense_Rv0774c_53_to_stop	sense Rv0774c 858	Rv0774c	2.88467	2.88242	0.218764
MamA	antisense_Rv0774c_56_to_stop	antisense Rv0774c 855	Rv0774c	2.62298	2.63058	0.218633
HsdM	33_up_of_Rv0770	intergenic none NA	none	2.52932	2.48818	0.230211
HsdM	26_up_of_Rv0770	intergenic none NA	none	2.74827	2.77815	0.25225
MamA	antisense_purD_547_from_start	antisense purD 547	purD	3.17861	3.14855	0.244944
MamA	sense_purD_550_from_start	sense purD 550	purD	2.68934	2.67848	0.257405
MamB	antisense_purB_547_from_start	antisense purB 547	purB	2.29702	2.28977	0.265493
HsdM	sense_cyp126_109_from_start	sense cyp126 109	cyp126	2.63505	2.62395	0.18679
HsdM	antisense_cyp126_116_from_start	sense cyp126 116	cyp126	2.4617	2.48487	0.248839
HsdM	sense_Rv0775_137_to_stop	antisense Rv0775 486	Rv0775	2.48327	2.49843	0.246101
HsdM	antisense_Rv0775_130_to_stop	sense Rv0775 493	Rv0775	2.54653	2.53717	0.245802
MamA	127_down_of_Rv0781	intergenic none NA	none	2.32857	2.33887	0.178798
MamA	130_down_of_Rv0781	intergenic none NA	none	3.04992	3.03373	0.272948
MamA	sense_emrB_649_to_stop	sense emrB 973	emrB	3.14757	3.09485	0.270683
MamA	antisense_emrB_652_to_stop	antisense emrB 970	emrB	1.80468	1.7796	0.283493
MamA	antisense_purC_277_from_start	antisense purC 277	purC	3.31435	3.28341	0.266344
MamA	sense_purC_280_from_start	sense purC 280	purC	2.55025	2.54539	0.275532
MamB	antisense_purC_379_to_stop	sense purC 514	purC	3.1661	3.18021	0.244411
HsdM	sense_Rv0787_45_from_start	sense Rv0787 45	Rv0787	2.47033	2.42489	0.268558
HsdM	antisense_Rv0787_52_from_start	antisense Rv0787 52	Rv0787	2.53859	2.523	0.211315
MamA	antisense_Rv0785_619_from_start	sense Rv0785 619	Rv0785	2.60358	2.56887	0.475064
MamA	sense_Rv0785_622_from_start	antisense Rv0785 622	Rv0785	2.28875	2.26006	0.402873
MamB	antisense_Rv0785_523_from_start	sense Rv0785 523	Rv0785	3.1515	3.14141	0.217917
HsdM	sense_Rv0787_180_from_start	sense Rv0787 180	Rv0787	2.43143	2.42844	0.208465
HsdM	antisense_Rv0787_187_from_start	antisense Rv0787 187	Rv0787	2.64365	2.64973	0.196381
MamA	antisense_Rv0787A_106_to_stop	sense Rv0787A 133	Rv0787A	3.04771	3.06875	0.348764
MamA	sense_Rv0787A_103_to_stop	antisense Rv0787A 136	Rv0787A	2.20788	2.20159	0.292786
MamB	antisense_Rv0794c_133_from_start	sense Rv0794c 133	Rv0794c	2.74382	2.73013	0.213134
MamB	sense_pepC_208_from_start	antisense pepC 208	pepC	2.74168	2.76567	0.375399
MamA	sense_Rv0802c_241_to_stop	sense Rv0802c 415	Rv0802c	2.67966	2.65946	0.287561
MamA	antisense_Rv0802c_244_to_stop	antisense Rv0802c 412	Rv0802c	3.00488	3.00838	0.28516
MamA	sense_Rv0802c_106_from_start	antisense Rv0802c 106	Rv0802c	2.54518	2.56011	0.178341
MamA	antisense_Rv0802c_103_from_start	sense Rv0802c 103	Rv0802c	2.84917	2.84297	0.240133
MamA	sense_Rv0802c_52_from_start	antisense Rv0802c 52	Rv0802c	3.03454	3.02608	0.206246
MamA	antisense_Rv0802c_49_from_start	sense Rv0802c 49	Rv0802c	3.30408	3.2568	0.249177
MamB	sense_purL_676_to_stop	sense purL 1588	purL	2.75447	2.75593	0.196406
MamB	antisense_purL_43_to_stop	antisense purL 2221	purL	3.00243	2.98087	0.207072
MamA	antisense_Rv0804_45_from_start	antisense Rv0804 45	Rv0804	3.08454	3.05107	0.236003
MamA	sense_Rv0804_48_from_start	sense Rv0804 48	Rv0804	2.67916	2.69653	0.205755
MamA	antisense_Rv0805_246_to_stop	sense Rv0805 710	Rv0805	3.19006	3.18053	0.223573
MamA	sense_Rv0805_243_to_stop	antisense Rv0805 713	Rv0805	2.80491	2.82484	0.248117
MamA	sense_cpsY_103_to_stop	sense cpsY 1495	cpsY	3.32872	3.33053	0.244397
MamA	antisense_cpsY_106_to_stop	antisense cpsY 1492	cpsY	2.84328	2.84451	0.196878
MamA	antisense_purM_216_from_start	antisense purM 216	purM	2.57172	2.58272	0.293906
MamA	sense_purM_219_from_start	sense purM 219	purM	3.22418	3.21091	0.242012
MamA	antisense_purF_247_to_stop	antisense purF 1336	purF	3.1143	3.10492	0.217588
MamA	sense_purF_244_to_stop	sense purF 1339	purF	2.35172	2.36531	0.266308
MamA	antisense_purM_460_to_stop	sense purM 634	purM	3.17188	3.18434	0.22786
MamA	sense_purM_457_to_stop	antisense purM 637	purM	2.74353	2.74383	0.244227
MamA	9_up_of_Rv0818	intergenic none NA	none	3.02812	3.03969	0.222038
MamA	6_up_of_Rv0818	intergenic none NA	none	2.34372	2.33245	0.215645
HsdM	sense_Rv0818_34_from_start	sense Rv0818 34	Rv0818	2.85191	2.83072	0.237793
HsdM	antisense_Rv0818_41_from_start	antisense Rv0818 41	Rv0818	2.78901	2.78302	0.254411
MamA	antisense_Rv0818_112_from_start	antisense Rv0818 112	Rv0818	3.26563	3.24958	0.205274
MamA	sense_Rv0818_115_from_start	sense Rv0818 115	Rv0818	2.71304	2.75673	0.338445
HsdM	sense_Rv0818_210_from_start	sense Rv0818 210	Rv0818	2.79699	2.77163	0.244535
HsdM	antisense_Rv0818_217_from_start	antisense Rv0818 217	Rv0818	2.50431	2.50977	0.250376
MamB	antisense_mshD_418_from_start	antisense mshD 418	mshD	2.99336	2.9903	0.261917
MamA	sense_Rv0817c_355_from_start	antisense Rv0817c 355	Rv0817c	2.7141	2.72784	0.198561
MamA	antisense_Rv0817c_352_from_start	sense Rv0817c 352	Rv0817c	3.09235	3.07928	0.228683
MamA	sense_Rv0817c_274_from_start	antisense Rv0817c 274	Rv0817c	2.10065	2.09687	0.27253
MamA	antisense_Rv0817c_271_from_start	sense Rv0817c 271	Rv0817c	2.94729	2.90244	0.293673
MamB	antisense_Rv0818_340_to_stop	sense Rv0818 427	Rv0818	3.06283	3.07301	0.208444
MamA	sense_Rv0822c_913_to_stop	antisense Rv0822c 1141	Rv0822c	3.3223	3.32227	0.262721
MamA	antisense_Rv0822c_916_to_stop	sense Rv0822c 1138	Rv0822c	3.16184	3.2055	0.235458
HsdM	antisense_Rv0822c_82_from_start	antisense Rv0822c 82	Rv0822c	2.55123	2.5252	0.218826
MamA	sense_Rv0822c_65_to_stop	antisense Rv0822c 1989	Rv0822c	3.19796	3.18964	0.219155
MamA	antisense_Rv0822c_68_to_stop	sense Rv0822c 1986	Rv0822c	2.87905	2.85558	0.285164
HsdM	sense_Rv0822c_75_from_start	sense Rv0822c 75	Rv0822c	2.682	2.66415	0.23011
MamB	49_up_of_Rv0822c	intergenic none NA	none	2.79599	2.80394	0.246291
MamA	antisense_Rv0826_403_to_stop	sense Rv0826 652	Rv0826	3.30122	3.3037	0.286534
MamA	sense_Rv0826_400_to_stop	antisense Rv0826 655	Rv0826	2.95949	2.95603	0.247344
HsdM	antisense_Rv0828c_171_from_start	sense Rv0828c 171	Rv0828c	2.64992	2.64863	0.245534
HsdM	sense_Rv0828c_164_from_start	antisense Rv0828c 164	Rv0828c	2.55886	2.56017	0.209358
MamA	sense_kmtR_139_to_stop	sense kmtR 253	kmtR	2.94186	2.91289	0.270964
MamA	antisense_kmtR_142_to_stop	antisense kmtR 250	kmtR	2.7529	2.70674	0.245578
MamA	antisense_Rv0830_374_to_stop	sense Rv0830 531	Rv0830	2.514	2.55582	0.222929
MamA	sense_Rv0830_371_to_stop	antisense Rv0830 534	Rv0830	2.26589	2.27987	0.198692
MamA	6_up_of_desA1	intergenic none NA	none	2.20622	2.14534	0.327167
MamA	9_up_of_desA1	intergenic none NA	none	2.08815	2.07735	0.319664
MamB	sense_Rv0830_94_to_stop	sense Rv0830 811	Rv0830	2.79745	2.78874	0.24761
MamA	sense_Rv0831c_406_from_start	antisense Rv0831c 406	Rv0831c	2.71012	2.68314	0.218174
MamA	antisense_Rv0831c_403_from_start	sense Rv0831c 403	Rv0831c	2.87619	2.90205	0.262365
MamA	sense_PE_PGRS14_819_to_stop	antisense PE_PGRS14 1829	PE_PGRS14	2.97413	2.98569	0.211883
MamA	antisense_PE_PGRS14_822_to_stop	sense PE_PGRS14 1826	PE_PGRS14	3.01549	3.04486	0.237511
MamB	antisense_Rv0836c_289_from_start	sense Rv0836c 289	Rv0836c	2.42459	2.44347	0.207755
MamA	sense_PE_PGRS14_416_from_start	sense PE_PGRS14 416	PE_PGRS14	2.49928	2.52076	0.250679
MamA	antisense_PE_PGRS14_413_from_start	antisense PE_PGRS14 413	PE_PGRS14	2.74838	2.75019	0.202307
HsdM	sense_lpqQ_87_to_stop	sense lpqQ 557	lpqQ	2.15316	2.1562	0.229531
HsdM	antisense_lpqQ_80_to_stop	antisense lpqQ 564	lpqQ	2.07361	2.09567	0.23673
MamB	antisense_Rv0837c_493_from_start	sense Rv0837c 493	Rv0837c	3.09853	3.07298	0.264185
MamA	119_down_of_Rv0841	intergenic none NA	none	3.32766	3.33021	0.244352
MamA	122_down_of_Rv0841	intergenic none NA	none	2.26223	2.28047	0.231187
MamB	antisense_Rv0843_444_from_start	antisense Rv0843 444	Rv0843	2.80756	2.77523	0.236031
MamA	sense_narL_142_from_start	antisense narL 142	narL	2.69554	2.70315	0.224362
MamA	antisense_narL_139_from_start	sense narL 139	narL	2.76983	2.77945	0.283827
MamA	antisense_Rv0843_46_from_start	antisense Rv0843 46	Rv0843	3.30078	3.281	0.230193
MamA	sense_Rv0843_49_from_start	sense Rv0843 49	Rv0843	2.86838	2.83946	0.264557
MamA	antisense_cysK2_260_to_stop	sense cysK2 858	cysK2	3.06613	3.07638	0.235096
MamA	sense_cysK2_257_to_stop	antisense cysK2 861	cysK2	3.27639	3.2824	0.277269
HsdM	sense_Rv0845_332_to_stop	antisense Rv0845 945	Rv0845	2.61451	2.52391	0.511723
HsdM	antisense_Rv0845_325_to_stop	sense Rv0845 952	Rv0845	2.60196	2.46573	0.568582
MamB	antisense_Rv0845_26_to_stop	antisense Rv0845 1251	Rv0845	2.74542	2.75352	0.240117
HsdM	sense_Rv0852_369_from_start	sense Rv0852 369	Rv0852	2.63376	2.61174	0.204466
HsdM	antisense_Rv0852_376_from_start	antisense Rv0852 376	Rv0852	2.8501	2.85822	0.197645
MamA	antisense_cysK2_550_from_start	antisense cysK2 550	cysK2	3.11635	3.0902	0.250808
MamA	sense_cysK2_553_from_start	sense cysK2 553	cysK2	3.09925	3.08778	0.255938
MamB	antisense_pdc_220_from_start	antisense pdc 220	pdc	3.12313	3.10894	0.2649
MamB	sense_cysK2_38_to_stop	sense cysK2 1080	cysK2	3.00263	3.01234	0.265949
MamA	antisense_far_217_from_start	antisense far 217	far	3.18612	3.20003	0.232875
MamA	sense_far_220_from_start	sense far 220	far	3.22082	3.18996	0.285881
MamB	antisense_Rv0851c_148_from_start	sense Rv0851c 148	Rv0851c	2.59331	2.58289	0.248853
MamA	antisense_Rv0857_220_from_start	antisense Rv0857 220	Rv0857	2.81161	2.80039	0.197702
MamA	sense_Rv0857_223_from_start	sense Rv0857 223	Rv0857	2.68752	2.69859	0.188139
HsdM	antisense_ercc3_390_to_stop	sense ercc3 1238	ercc3	2.45036	2.44168	0.243746
HsdM	sense_ercc3_397_to_stop	antisense ercc3 1231	ercc3	2.49276	2.44593	0.283871
MamA	antisense_Rv0859_286_from_start	antisense Rv0859 286	Rv0859	2.52177	2.56343	0.192869
MamA	sense_Rv0859_289_from_start	sense Rv0859 289	Rv0859	2.486	2.50674	0.175359
MamA	antisense_Rv0859_85_to_stop	antisense Rv0859 1126	Rv0859	3.04284	3.04958	0.207491
MamA	sense_Rv0859_82_to_stop	sense Rv0859 1129	Rv0859	3.05891	2.99395	0.259745
MamA	antisense_fadB_352_from_start	sense fadB 352	fadB	2.70782	2.74878	0.274576
MamA	sense_fadB_355_from_start	antisense fadB 355	fadB	2.13062	2.12192	0.240913
MamA	antisense_fadB_1051_to_stop	sense fadB 1111	fadB	3.21235	3.22641	0.276961
MamA	sense_fadB_1048_to_stop	antisense fadB 1114	fadB	2.59693	2.64784	0.247762
MamA	antisense_fadB_1036_to_stop	sense fadB 1126	fadB	3.1263	3.12589	0.344077
MamA	sense_fadB_1033_to_stop	antisense fadB 1129	fadB	3.26025	3.23552	0.309386
MamA	antisense_mog_87_to_stop	antisense mog 395	mog	2.85059	2.81573	0.188551
MamA	sense_mog_84_to_stop	sense mog 398	mog	2.35129	2.30761	0.275367
HsdM	antisense_ercc3_801_to_stop	antisense ercc3 827	ercc3	2.98054	2.99442	0.241104
HsdM	sense_ercc3_808_to_stop	sense ercc3 820	ercc3	2.50775	2.50879	0.236438
MamB	antisense_Rv0862c_55_to_stop	sense Rv0862c 2215	Rv0862c	2.81337	2.83171	0.232522
MamB	antisense_Rv0862c_259_to_stop	sense Rv0862c 2011	Rv0862c	3.10998	3.14018	0.26924
HsdM	antisense_moaD2_25_to_stop	antisense moaD2 253	moaD2	2.6797	2.68968	0.299722
HsdM	sense_moaD2_32_to_stop	antisense moaD2 246	moaD2	2.12969	2.11652	0.219966
MamA	6_up_of_Rv0870c	intergenic none NA	none	2.19482	2.21358	0.22424
MamA	9_up_of_Rv0870c	intergenic none NA	none	2.74843	2.74199	0.279605
MamA	sense_PE_PGRS15_312_to_stop	antisense PE_PGRS15 1517	PE_PGRS15	1.77651	1.77399	0.277309
MamA	antisense_PE_PGRS15_315_to_stop	sense PE_PGRS15 1514	PE_PGRS15	3.11926	3.12044	0.277467
MamB	sense_PE_PGRS15_328_from_start	sense PE_PGRS15 328	PE_PGRS15	2.74046	2.77387	0.212354
MamA	sense_rpfA_219_to_stop	antisense rpfA 1004	rpfA	2.86889	2.87133	0.209507
MamA	antisense_rpfA_222_to_stop	sense rpfA 1001	rpfA	3.02325	3.04004	0.25186
MamB	sense_PE_PGRS15_202_from_start	sense PE_PGRS15 202	PE_PGRS15	2.77114	2.77043	0.234536
HsdM	sense_fadE10_411_from_start	antisense fadE10 411	fadE10	2.67746	2.66926	0.276662
HsdM	antisense_fadE10_418_from_start	sense fadE10 418	fadE10	2.61103	2.55763	0.288485
MamA	antisense_fadE10_391_to_stop	antisense fadE10 1561	fadE10	2.73951	2.75398	0.232211
MamA	sense_fadE10_388_to_stop	sense fadE10 1564	fadE10	2.73125	2.69721	0.242231
MamA	sense_Rv0874c_201_to_stop	sense Rv0874c 959	Rv0874c	3.1691	3.14769	0.247835
MamA	antisense_Rv0874c_204_to_stop	antisense Rv0874c 956	Rv0874c	2.99551	3.00224	0.264883
MamB	antisense_Rv0874c_487_to_stop	antisense Rv0874c 673	Rv0874c	2.75915	2.8039	0.242364
MamA	72_up_of_PE_PGRS15	intergenic none NA	none	2.62612	2.61345	0.237003
MamA	75_up_of_PE_PGRS15	intergenic none NA	none	2.69736	2.66406	0.261389
MamB	antisense_fadE10_754_from_start	sense fadE10 754	fadE10	2.59459	2.60451	0.202287
MamA	antisense_fadE10_154_to_stop	sense fadE10 1798	fadE10	3.32538	3.35241	0.186057
MamA	sense_fadE10_151_to_stop	antisense fadE10 1801	fadE10	2.69476	2.6817	0.262627
MamA	antisense_fadE10_133_to_stop	sense fadE10 1819	fadE10	3.10082	3.0652	0.228782
MamA	sense_fadE10_130_to_stop	antisense fadE10 1822	fadE10	3.17186	3.11712	0.263786
MamB	antisense_fprB_135_from_start	antisense fprB 135	fprB	2.74381	2.72575	0.205509
MamA	antisense_fprB_679_to_stop	antisense fprB 1048	fprB	3.37069	3.34688	0.208779
MamA	sense_fprB_676_to_stop	sense fprB 1051	fprB	2.4053	2.42027	0.290331
MamB	antisense_fprB_43_to_stop	antisense fprB 1684	fprB	3.14822	3.132	0.235002
MamA	141_up_of_Rv0892	intergenic none NA	none	2.84957	2.82878	0.211039
MamA	138_up_of_Rv0892	intergenic none NA	none	3.01585	3.00489	0.239269
MamA	sense_Rv0890c_1068_from_start	antisense Rv0890c 1068	Rv0890c	3.16872	3.16719	0.241861
MamA	antisense_Rv0890c_1065_from_start	sense Rv0890c 1065	Rv0890c	2.87724	2.88647	0.225901
MamB	sense_Rv0891c_210_from_start	antisense Rv0891c 210	Rv0891c	2.81485	2.80199	0.230607
MamA	18_up_of_Rv0893c	intergenic none NA	none	2.70726	2.65749	0.346849
MamA	21_up_of_Rv0893c	intergenic none NA	none	2.64059	2.61324	0.324851
MamA	antisense_gltA2_472_to_stop	sense gltA2 823	gltA2	2.8049	2.76297	0.323276
MamA	sense_gltA2_469_to_stop	antisense gltA2 826	gltA2	2.61799	2.62556	0.27987
MamA	sense_prrB_478_to_stop	sense prrB 862	prrB	2.50563	2.51524	0.247465
MamA	antisense_prrB_481_to_stop	antisense prrB 859	prrB	3.00057	3.01289	0.300979
MamA	sense_prrA_67_to_stop	antisense prrA 643	prrA	2.40481	2.43483	0.179952
MamA	antisense_prrA_70_to_stop	sense prrA 640	prrA	2.81906	2.8602	0.224448
HsdM	sense_arfA_176_to_stop	antisense arfA 804	arfA	2.51388	2.52697	0.24068
HsdM	antisense_arfA_169_to_stop	sense arfA 811	arfA	2.18771	2.16957	0.234359
MamA	sense_prrB_55_to_stop	antisense prrB 1285	prrB	3.04743	3.03278	0.223949
MamA	antisense_prrB_58_to_stop	sense prrB 1282	prrB	3.2989	3.278	0.259463
MamA	sense_prrB_580_to_stop	sense prrB 760	prrB	1.66885	1.69199	0.259387
MamA	antisense_prrB_583_to_stop	antisense prrB 757	prrB	2.81852	2.80658	0.198038
MamA	sense_prrA_274_to_stop	sense prrA 436	prrA	2.24934	2.28671	0.228999
MamA	antisense_prrA_277_to_stop	antisense prrA 433	prrA	3.16683	3.13313	0.229748
MamA	antisense_echA6_335_to_stop	sense echA6 396	echA6	2.66666	2.64462	0.3293
MamA	sense_echA6_332_to_stop	antisense echA6 399	echA6	2.94549	2.90372	0.358303
MamA	antisense_ctpE_1075_to_stop	sense ctpE 1318	ctpE	3.08999	3.03533	0.409374
MamA	sense_ctpE_1072_to_stop	antisense ctpE 1321	ctpE	3.07128	3.0096	0.389023
MamB	antisense_Rv0906_446_to_stop	sense Rv0906 672	Rv0906	2.67945	2.67382	0.208706
HsdM	sense_Rv0911_300_from_start	sense Rv0911 300	Rv0911	2.56377	2.54204	0.209293
HsdM	antisense_Rv0911_307_from_start	antisense Rv0911 307	Rv0911	2.52988	2.55402	0.205838
MamA	antisense_Rv0912_139_from_start	antisense Rv0912 139	Rv0912	3.02003	2.9986	0.222255
MamA	sense_Rv0912_142_from_start	sense Rv0912 142	Rv0912	2.92573	2.9373	0.254122
MamB	sense_Rv0913c_30_to_stop	antisense Rv0913c 1478	Rv0913c	2.91257	2.90138	0.210026
MamA	sense_Rv0914c_367_from_start	antisense Rv0914c 367	Rv0914c	2.82988	2.82743	0.256132
MamA	antisense_Rv0914c_364_from_start	sense Rv0914c 364	Rv0914c	3.32579	3.30149	0.294107
MamA	135_down_of_betP	intergenic none NA	none	3.33325	3.32117	0.229867
MamA	138_down_of_betP	intergenic none NA	none	2.80093	2.78753	0.198435
MamA	sense_PPE14_203_to_stop	antisense PPE14 1068	PPE14	3.09211	3.08523	0.218622
MamA	antisense_PPE14_206_to_stop	sense PPE14 1065	PPE14	3.42206	3.39666	0.23511
MamB	sense_PPE14_297_to_stop	sense PPE14 974	PPE14	3.10898	3.10282	0.218092
MamB	antisense_Rv0919_184_to_stop	sense Rv0919 316	Rv0919	3.17035	3.14072	0.247409
HsdM	sense_betP_330_from_start	antisense betP 330	betP	2.47965	2.52886	0.192913
HsdM	antisense_betP_337_from_start	sense betP 337	betP	1.88274	1.91702	0.212373
MamA	antisense_betP_559_from_start	sense betP 559	betP	3.08946	3.06334	0.31262
MamA	sense_betP_562_from_start	antisense betP 562	betP	3.18851	3.18758	0.251977
HsdM	sense_Rv0918_162_from_start	sense Rv0918 162	Rv0918	2.55096	2.53231	0.212175
HsdM	antisense_Rv0918_169_from_start	antisense Rv0918 169	Rv0918	2.22247	2.21479	0.242237
MamA	antisense_Rv0922_341_to_stop	antisense Rv0922 1311	Rv0922	2.70124	2.68102	0.229304
MamA	sense_Rv0922_338_to_stop	sense Rv0922 1314	Rv0922	3.24474	3.23864	0.251665
MamA	sense_Rv0923c_490_to_stop	sense Rv0923c 574	Rv0923c	3.22834	3.18464	0.20126
MamA	antisense_Rv0923c_493_to_stop	antisense Rv0923c 571	Rv0923c	2.72478	2.68506	0.245154
MamA	sense_mntH_275_to_stop	antisense mntH 1011	mntH	3.17238	3.19975	0.264563
MamA	antisense_mntH_278_to_stop	sense mntH 1008	mntH	2.83745	2.86901	0.233814
MamA	sense_Rv0920c_562_from_start	antisense Rv0920c 562	Rv0920c	3.14845	3.13541	0.259434
MamA	antisense_Rv0920c_559_from_start	sense Rv0920c 559	Rv0920c	3.13179	3.12558	0.256823
MamB	antisense_Rv0927c_175_to_stop	antisense Rv0927c 616	Rv0927c	3.11906	3.13697	0.225277
MamA	sense_Rv0927c_199_to_stop	sense Rv0927c 592	Rv0927c	1.71316	1.75383	0.332851
MamA	antisense_Rv0927c_202_to_stop	antisense Rv0927c 589	Rv0927c	2.97367	2.97637	0.194622
MamB	sense_Rv0922_53_to_stop	sense Rv0922 1599	Rv0922	2.60033	2.59143	0.231745
MamB	37_down_of_Rv0923c	intergenic none NA	none	3.32551	3.29889	0.252892
MamB	sense_Rv0923c_83_to_stop	sense Rv0923c 981	Rv0923c	2.51005	2.53572	0.233364
MamB	antisense_Rv0925c_52_from_start	sense Rv0925c 52	Rv0925c	2.98246	3.0044	0.253539
MamA	sense_pknD_907_to_stop	antisense pknD 1087	pknD	2.65218	2.68875	0.241473
MamA	antisense_pknD_910_to_stop	sense pknD 1084	pknD	3.3176	3.32616	0.263477
MamA	sense_pstS2_153_from_start	antisense pstS2 153	pstS2	3.03891	3.05552	0.242155
MamA	antisense_pstS2_150_from_start	sense pstS2 150	pstS2	2.53725	2.52849	0.197012
MamB	antisense_pstS1_395_to_stop	sense pstS1 729	pstS1	3.05588	3.0509	0.250936
MamA	antisense_pstB_289_from_start	antisense pstB 289	pstB	3.23011	3.23402	0.237899
MamA	sense_pstB_292_from_start	sense pstB 292	pstB	2.89168	2.88587	0.203829
MamA	antisense_ligD_681_from_start	sense ligD 681	ligD	2.73437	2.61944	0.33271
MamA	sense_ligD_684_from_start	antisense ligD 684	ligD	3.01495	3.01637	0.284907
MamA	antisense_pstA2_192_from_start	antisense pstA2 192	pstA2	2.71078	2.68218	0.212274
MamA	sense_pstA2_195_from_start	sense pstA2 195	pstA2	2.44499	2.47945	0.255269
MamA	antisense_Rv0939_520_from_start	sense Rv0939 520	Rv0939	2.69106	2.75494	0.294625
MamA	sense_Rv0939_523_from_start	antisense Rv0939 523	Rv0939	2.45583	2.45759	0.208435
MamA	antisense_Rv0939_604_from_start	sense Rv0939 604	Rv0939	3.02484	3.05036	0.229033
MamA	sense_Rv0939_607_from_start	antisense Rv0939 607	Rv0939	2.92449	2.94033	0.22736
MamB	antisense_Rv0939_571_to_stop	antisense Rv0939 1363	Rv0939	1.94341	1.93788	0.236395
MamA	sense_mku_55_to_stop	sense mku 766	mku	2.63767	2.61836	0.235112
MamA	antisense_mku_58_to_stop	antisense mku 763	mku	3.15696	3.10965	0.309513
MamA	antisense_Rv0940c_37_to_stop	antisense Rv0940c 829	Rv0940c	2.18667	2.15486	0.450527
MamA	antisense_ligD_322_from_start	sense ligD 322	ligD	3.0634	3.04174	0.263988
MamA	sense_ligD_325_from_start	antisense ligD 325	ligD	2.41871	2.46851	0.289908
MamA	antisense_Rv0939_699_from_start	sense Rv0939 699	Rv0939	2.80901	2.82244	0.230911
MamA	sense_Rv0939_702_from_start	antisense Rv0939 702	Rv0939	3.16948	3.19012	0.23273
MamA	antisense_Rv0939_859_from_start	sense Rv0939 859	Rv0939	2.92769	2.90827	0.273903
MamA	sense_Rv0939_862_from_start	antisense Rv0939 862	Rv0939	2.15879	2.15442	0.232978
MamA	antisense_Rv0945_202_to_stop	sense Rv0945 559	Rv0945	2.80218	2.73654	0.414738
MamA	sense_Rv0945_199_to_stop	antisense Rv0945 562	Rv0945	2.95963	2.88268	0.361244
MamA	sense_Rv0940c_34_to_stop	sense Rv0940c 832	Rv0940c	2.13439	2.09691	0.405937
MamA	sense_pgi_649_from_start	sense pgi 649	pgi	2.05853	2.08839	0.390763
MamA	antisense_pgi_646_from_start	antisense pgi 646	pgi	2.74191	2.72192	0.358072
MamA	sense_Rv0941c_105_from_start	antisense Rv0941c 105	Rv0941c	3.28307	3.27863	0.232454
MamA	antisense_Rv0941c_102_from_start	sense Rv0941c 102	Rv0941c	2.56985	2.61277	0.246421
MamA	antisense_Rv0942_43_to_stop	antisense Rv0942 235	Rv0942	2.50867	2.50427	0.252361
MamA	sense_Rv0942_40_to_stop	sense Rv0942 238	Rv0942	2.60323	2.60359	0.208953
MamA	29_up_of_Rv0947c	intergenic none NA	none	2.88211	2.87469	0.247488
MamA	32_up_of_Rv0947c	intergenic none NA	none	3.28279	3.25106	0.249288
MamA	antisense_sucC_466_to_stop	sense sucC 697	sucC	2.69223	2.7013	0.213341
MamA	sense_sucC_463_to_stop	antisense sucC 700	sucC	2.80007	2.81626	0.233275
MamB	antisense_uvrD1_318_from_start	sense uvrD1 318	uvrD1	2.42186	2.43937	0.284628
MamA	antisense_sucD_79_to_stop	sense sucD 832	sucD	2.73697	2.71871	0.193837
MamA	sense_sucD_76_to_stop	antisense sucD 835	sucD	2.42789	2.46293	0.187097
MamA	sense_Rv0950c_191_from_start	antisense Rv0950c 191	Rv0950c	2.75686	2.72672	0.249053
MamA	antisense_Rv0950c_188_from_start	sense Rv0950c 188	Rv0950c	3.15393	3.16389	0.305732
MamA	antisense_Rv0954_66_to_stop	sense Rv0954 845	Rv0954	3.23865	3.23058	0.265577
MamA	sense_Rv0954_63_to_stop	antisense Rv0954 848	Rv0954	2.46354	2.42779	0.23797
MamB	antisense_Rv0958_37_from_start	sense Rv0958 37	Rv0958	3.34925	3.36019	0.254296
MamA	antisense_Rv0958_619_to_stop	sense Rv0958 760	Rv0958	2.02556	2.03664	0.196999
MamA	sense_Rv0958_616_to_stop	antisense Rv0958 763	Rv0958	3.0448	3.03002	0.233768
MamA	antisense_Rv0958_613_to_stop	sense Rv0958 766	Rv0958	3.09416	3.08487	0.290876
MamA	sense_Rv0958_610_to_stop	antisense Rv0958 769	Rv0958	2.56732	2.54741	0.245759
MamB	sense_Rv0959_315_to_stop	sense Rv0959 1703	Rv0959	2.68618	2.67779	0.198036
MamA	antisense_Rv0959_262_to_stop	antisense Rv0959 1756	Rv0959	2.73876	2.74422	0.2618
MamA	sense_Rv0959_259_to_stop	sense Rv0959 1759	Rv0959	2.75525	2.80411	0.263752
MamA	antisense_Rv0959_982_from_start	sense Rv0959 982	Rv0959	3.08627	3.09612	0.235396
MamA	sense_Rv0959_985_from_start	antisense Rv0959 985	Rv0959	3.24394	3.16869	0.244313
MamA	antisense_ctpV_194_to_stop	sense ctpV 2184	ctpV	2.47918	2.46633	0.200385
MamA	sense_ctpV_191_to_stop	antisense ctpV 2187	ctpV	2.92835	2.94975	0.254322
MamA	antisense_csoR_88_from_start	sense csoR 88	csoR	3.23585	3.20835	0.268187
MamA	sense_csoR_91_from_start	antisense csoR 91	csoR	2.77253	2.77376	0.20078
MamB	antisense_csoR_105_from_start	antisense csoR 105	csoR	2.63932	2.64109	0.23598
MamA	antisense_csoR_148_from_start	antisense csoR 148	csoR	3.10485	3.04945	0.241015
MamA	sense_csoR_151_from_start	sense csoR 151	csoR	3.2948	3.28404	0.245176
MamA	sense_accA2_151_to_stop	sense accA2 1852	accA2	2.23498	2.25504	0.339508
MamA	antisense_accA2_154_to_stop	antisense accA2 1849	accA2	2.82859	2.80129	0.415075
MamA	antisense_ctpV_835_from_start	sense ctpV 835	ctpV	3.11564	3.11766	0.234141
MamA	sense_ctpV_838_from_start	antisense ctpV 838	ctpV	3.23381	3.25402	0.248646
MamA	sense_accA2_847_from_start	sense accA2 847	accA2	2.74847	2.64677	0.428292
MamA	antisense_accA2_844_from_start	antisense accA2 844	accA2	2.89139	2.8603	0.261227
HsdM	sense_Rv0970_277_from_start	sense Rv0970 277	Rv0970	2.28833	2.28891	0.222879
HsdM	antisense_Rv0970_284_from_start	antisense Rv0970 284	Rv0970	1.67577	1.67901	0.255879
HsdM	sense_PE_PGRS16_835_from_start	antisense PE_PGRS16 835	PE_PGRS16	2.50854	2.49561	0.277027
HsdM	antisense_PE_PGRS16_842_from_start	sense PE_PGRS16 842	PE_PGRS16	2.39927	2.42334	0.256569
MamA	sense_accD2_208_from_start	sense accD2 208	accD2	3.47805	3.42844	0.267626
MamA	antisense_accD2_205_from_start	antisense accD2 205	accD2	2.76161	2.73124	0.29954
MamA	antisense_PE_PGRS16_327_to_stop	antisense PE_PGRS16 2444	PE_PGRS16	2.83992	2.88649	0.286839
MamA	sense_PE_PGRS16_324_to_stop	sense PE_PGRS16 2447	PE_PGRS16	2.9887	2.99698	0.280486
MamB	sense_Rv0979c_16_from_start	antisense Rv0979c 16	Rv0979c	2.61617	2.62362	0.250439
MamA	antisense_mprA_205_to_stop	sense mprA 481	mprA	3.06999	3.06954	0.251818
MamA	sense_mprA_202_to_stop	antisense mprA 484	mprA	2.31114	2.31209	0.231922
MamA	antisense_pepD_177_to_stop	antisense pepD 1217	pepD	3.18826	3.14631	0.24787
MamA	sense_pepD_174_to_stop	sense pepD 1220	pepD	2.54586	2.5179	0.201918
MamB	antisense_mprB_664_to_stop	sense mprB 850	mprB	2.63554	2.6254	0.227225
MamA	antisense_mprB_532_to_stop	sense mprB 982	mprB	2.69069	2.68281	0.206825
MamA	sense_mprB_529_to_stop	antisense mprB 985	mprB	3.01682	2.98972	0.257703
MamB	antisense_grcC2_208_to_stop	antisense grcC2 769	grcC2	3.15872	3.12581	0.243924
MamB	antisense_grcC2_238_to_stop	antisense grcC2 739	grcC2	2.97005	2.96558	0.222387
MamA	antisense_galU_442_from_start	antisense galU 442	galU	2.99717	2.99567	0.300005
MamA	sense_galU_445_from_start	sense galU 445	galU	2.7193	2.73356	0.246961
MamB	antisense_grcC2_12_to_stop	antisense grcC2 965	grcC2	2.01339	2.03936	0.236879
MamA	antisense_galU_235_from_start	antisense galU 235	galU	3.12024	3.09355	0.252536
MamA	sense_galU_238_from_start	sense galU 238	galU	2.28395	2.29071	0.26613
MamA	sense_Rv0992c_109_from_start	antisense Rv0992c 109	Rv0992c	3.21636	3.22093	0.239934
MamA	antisense_Rv0992c_106_from_start	sense Rv0992c 106	Rv0992c	2.39796	2.37515	0.219119
HsdM	sense_Rv0998_435_from_start	sense Rv0998 435	Rv0998	2.75801	2.73215	0.230817
HsdM	antisense_Rv0998_442_from_start	antisense Rv0998 442	Rv0998	2.43315	2.44185	0.239937
MamB	antisense_moeA1_193_to_stop	antisense moeA1 1087	moeA1	2.45154	2.42702	0.282799
MamA	antisense_Rv0996_103_to_stop	sense Rv0996 973	Rv0996	2.89299	2.9248	0.251917
MamA	sense_Rv0996_100_to_stop	antisense Rv0996 976	Rv0996	2.77603	2.80867	0.303156
MamA	antisense_Rv0996_67_to_stop	antisense Rv0996 1009	Rv0996	2.64061	2.6336	0.216285
MamA	sense_Rv0996_64_to_stop	sense Rv0996 1012	Rv0996	1.8989	1.88535	0.280403
MamA	sense_Rv1004c_628_from_start	antisense Rv1004c 628	Rv1004c	2.82446	2.7901	0.21522
MamA	antisense_Rv1004c_625_from_start	sense Rv1004c 625	Rv1004c	3.17685	3.16779	0.274064
MamA	sense_Rv1002c_25_to_stop	antisense Rv1002c 1486	Rv1002c	2.4716	2.51343	0.250258
MamA	antisense_Rv1002c_28_to_stop	sense Rv1002c 1483	Rv1002c	2.1015	2.12461	0.239909
MamA	sense_metS_325_to_stop	antisense metS 1234	metS	2.69926	2.71345	0.241354
MamA	antisense_metS_328_to_stop	sense metS 1231	metS	3.14209	3.14351	0.246993
MamB	antisense_Rv1003_348_to_stop	sense Rv1003 509	Rv1003	2.94178	2.94859	0.261082
MamA	antisense_tatD_121_from_start	antisense tatD 121	tatD	2.86305	2.83278	0.224776
MamA	sense_tatD_124_from_start	sense tatD 124	tatD	2.54109	2.53024	0.207428
MamB	sense_Rv1005c_45_from_start	sense Rv1005c 45	Rv1005c	2.6432	2.62834	0.25804
MamA	sense_pth_41_from_start	antisense pth 41	pth	2.94951	2.96584	0.255047
MamA	antisense_pth_38_from_start	sense pth 38	pth	2.81336	2.83469	0.191687
MamA	sense_glmU_311_to_stop	antisense glmU 1176	glmU	3.256	3.24484	0.216771
MamA	antisense_glmU_314_to_stop	sense glmU 1173	glmU	2.2119	2.10917	0.264773
HsdM	antisense_pth_166_to_stop	antisense pth 409	pth	2.68072	2.61826	0.270524
HsdM	sense_pth_173_to_stop	sense pth 402	pth	2.6373	2.6099	0.316206
MamA	antisense_Rv1019_201_to_stop	sense Rv1019 392	Rv1019	2.91027	2.899	0.238298
MamA	sense_Rv1019_198_to_stop	antisense Rv1019 395	Rv1019	2.59204	2.64513	0.259695
MamA	antisense_Rv1019_31_to_stop	sense Rv1019 562	Rv1019	2.73966	2.75161	0.237839
MamA	sense_Rv1019_28_to_stop	antisense Rv1019 565	Rv1019	2.45834	2.46725	0.231531
MamA	sense_rplY_136_from_start	antisense rplY 136	rplY	3.34059	3.31753	0.209765
MamA	antisense_rplY_133_from_start	sense rplY 133	rplY	2.21586	2.18181	0.212223
MamB	antisense_mfd_235_from_start	antisense mfd 235	mfd	2.75368	2.77216	0.18844
MamA	sense_rplY_82_to_stop	antisense rplY 565	rplY	2.53527	2.5745	0.267707
MamA	antisense_rplY_85_to_stop	sense rplY 562	rplY	3.24132	3.24862	0.221015
MamA	antisense_mfd_1654_from_start	antisense mfd 1654	mfd	3.03829	3.05663	0.241983
MamA	sense_mfd_1657_from_start	sense mfd 1657	mfd	2.77953	2.78474	0.250871
MamA	antisense_mfd_1783_to_stop	sense mfd 1921	mfd	3.22556	3.21992	0.204867
MamA	sense_mfd_1780_to_stop	antisense mfd 1924	mfd	2.62425	2.63529	0.24336
MamB	antisense_mfd_865_to_stop	antisense mfd 2839	mfd	2.89725	2.86531	0.260713
MamA	antisense_mfd_472_to_stop	antisense mfd 3232	mfd	3.00136	2.95447	0.277721
MamA	sense_mfd_469_to_stop	sense mfd 3235	mfd	2.62832	2.60181	0.210064
HsdM	sense_Rv1021_343_to_stop	antisense Rv1021 634	Rv1021	1.86946	1.87738	0.29
HsdM	antisense_Rv1021_336_to_stop	sense Rv1021 641	Rv1021	2.52187	2.50786	0.253168
MamA	antisense_mfd_1405_from_start	antisense mfd 1405	mfd	3.24898	3.23785	0.263506
MamA	sense_mfd_1408_from_start	sense mfd 1408	mfd	2.39365	2.37016	0.245367
MamB	antisense_mfd_1417_from_start	antisense mfd 1417	mfd	3.39144	3.35375	0.269491
MamA	antisense_Rv1024_304_to_stop	sense Rv1024 382	Rv1024	2.71204	2.75693	0.226068
MamA	sense_Rv1024_301_to_stop	antisense Rv1024 385	Rv1024	2.63638	2.60037	0.244349
MamA	antisense_Rv1026_334_to_stop	sense Rv1026 625	Rv1026	3.20163	3.16341	0.25662
MamA	sense_Rv1026_331_to_stop	antisense Rv1026 628	Rv1026	3.35707	3.32489	0.275701
MamA	antisense_mfd_613_to_stop	antisense mfd 3091	mfd	2.69426	2.69969	0.214971
MamA	sense_mfd_610_to_stop	sense mfd 3094	mfd	2.89388	2.8989	0.31378
MamA	antisense_Rv1021_349_from_start	antisense Rv1021 349	Rv1021	3.1099	3.0959	0.282724
MamA	sense_Rv1021_352_from_start	sense Rv1021 352	Rv1021	2.74937	2.715	0.180422
MamA	antisense_lpqU_229_from_start	antisense lpqU 229	lpqU	2.87386	2.86867	0.326601
MamA	sense_lpqU_232_from_start	sense lpqU 232	lpqU	2.3912	2.37104	0.304911
MamB	sense_kdpD_1021_from_start	antisense kdpD 1021	kdpD	3.22159	3.223	0.269566
MamA	antisense_Rv1024_225_to_stop	sense Rv1024 461	Rv1024	2.4201	2.41937	0.288315
MamA	sense_Rv1024_222_to_stop	antisense Rv1024 464	Rv1024	2.69297	2.7032	0.267964
MamA	5_up_of_Rv1025	intergenic none NA	none	2.79337	2.7878	0.268992
MamA	2_up_of_Rv1025	intergenic none NA	none	2.27014	2.29744	0.348102
MamA	antisense_kdpA_634_from_start	sense kdpA 634	kdpA	2.99875	2.96877	0.228821
MamA	sense_kdpA_637_from_start	antisense kdpA 637	kdpA	2.35994	2.3629	0.225788
MamB	antisense_kdpD_272_to_stop	sense kdpD 2310	kdpD	2.78393	2.77847	0.219724
MamA	sense_kdpD_322_to_stop	antisense kdpD 2260	kdpD	2.77823	2.74619	0.26044
MamA	antisense_kdpD_325_to_stop	sense kdpD 2257	kdpD	3.23086	3.23071	0.261461
MamB	antisense_kdpE_199_from_start	sense kdpE 199	kdpE	3.17049	3.1733	0.24546
MamB	antisense_kdpD_946_to_stop	sense kdpD 1636	kdpD	3.16265	3.12814	0.234714
MamA	sense_kdpD_160_from_start	antisense kdpD 160	kdpD	3.03672	3.04705	0.232404
MamA	antisense_kdpD_157_from_start	sense kdpD 157	kdpD	3.1364	3.10179	0.218281
MamA	sense_kdpD_715_from_start	sense kdpD 715	kdpD	2.93811	2.91876	0.251627
MamA	antisense_kdpD_712_from_start	antisense kdpD 712	kdpD	2.61946	2.57701	0.20325
MamA	sense_trcS_280_from_start	sense trcS 280	trcS	2.71348	2.694	0.198097
MamA	antisense_trcS_277_from_start	antisense trcS 277	trcS	3.01997	3.05043	0.274206
HsdM	sense_trcR_158_to_stop	sense trcR 615	trcR	2.39678	2.38534	0.208162
HsdM	antisense_trcR_229_to_stop	antisense trcR 544	trcR	2.51835	2.54447	0.216203
HsdM	sense_trcR_236_to_stop	sense trcR 537	trcR	2.56609	2.58921	0.281447
MamA	sense_trcR_323_to_stop	sense trcR 450	trcR	3.05071	3.03203	0.233517
MamA	antisense_trcR_326_to_stop	antisense trcR 447	trcR	3.14797	3.14895	0.301595
MamA	antisense_kdpA_721_to_stop	sense kdpA 994	kdpA	2.88227	2.84286	0.242661
MamA	sense_kdpA_718_to_stop	antisense kdpA 997	kdpA	2.65063	2.67963	0.246694
MamA	sense_esxI_73_from_start	sense esxI 73	esxI	2.71189	2.70724	0.266169
MamA	antisense_esxI_70_from_start	antisense esxI 70	esxI	2.88929	2.92355	0.270861
HsdM	antisense_trcR_151_to_stop	antisense trcR 622	trcR	2.5482	2.56972	0.232127
MamA	305_down_of_Rv1041c	intergenic none NA	none	2.81666	2.80749	0.209061
MamA	302_down_of_Rv1041c	intergenic none NA	none	3.09108	3.0315	0.248071
MamA	sense_esxI_11_to_stop	sense esxI 273	esxI	3.27882	3.2587	0.277788
MamA	antisense_esxI_14_to_stop	antisense esxI 270	esxI	3.23175	3.21971	0.23637
MamA	sense_esxJ_135_from_start	antisense esxJ 135	esxJ	2.59753	2.59737	0.228251
MamA	antisense_esxJ_132_from_start	sense esxJ 132	esxJ	3.11312	3.16239	0.259839
MamB	sense_Rv1045_306_to_stop	antisense Rv1045 574	Rv1045	2.33618	2.31136	0.242773
MamA	583_down_of_Rv1041c	intergenic none NA	none	2.74902	2.76818	0.22756
MamA	580_down_of_Rv1041c	intergenic none NA	none	2.74079	2.74857	0.218567
MamA	sense_Rv1044_223_to_stop	antisense Rv1044 399	Rv1044	2.8309	2.86255	0.191767
MamA	32_up_of_Rv1048c	intergenic none NA	none	2.83157	2.80002	0.213243
MamA	35_up_of_Rv1048c	intergenic none NA	none	2.88191	2.87481	0.244918
MamA	antisense_Rv1045_100_to_stop	sense Rv1045 780	Rv1045	3.08805	3.11162	0.260414
MamA	sense_Rv1045_97_to_stop	sense Rv1045 783	Rv1045	2.38866	2.42444	0.211351
MamA	antisense_Rv1050_340_from_start	antisense Rv1050 340	Rv1050	3.15986	3.14224	0.258431
MamA	sense_Rv1050_343_from_start	sense Rv1050 343	Rv1050	2.73688	2.7262	0.26264
MamA	antisense_Rv1044_226_to_stop	sense Rv1044 396	Rv1044	1.49315	1.55323	0.291561
MamB	antisense_Rv1044_158_to_stop	sense Rv1044 464	Rv1044	2.46945	2.48947	0.200627
MamA	7_up_of_Rv1049	intergenic none NA	none	0.729336	0.730523	0.508039
MamB	sense_Rv1054_13_to_stop	antisense Rv1054 301	Rv1054	3.10728	3.12976	0.231026
MamA	antisense_Rv1056_223_to_stop	sense Rv1056 541	Rv1056	2.63433	2.59833	0.301594
MamA	sense_Rv1056_220_to_stop	antisense Rv1056 544	Rv1056	3.12817	3.12209	0.254337
HsdM	sense_Rv1056_118_to_stop	antisense Rv1056 646	Rv1056	2.54945	2.55206	0.258493
HsdM	antisense_Rv1056_111_to_stop	sense Rv1056 653	Rv1056	2.44888	2.50479	0.223269
MamA	4_up_of_Rv1049	intergenic none NA	none	1.38823	1.37845	0.437394
MamA	antisense_Rv1050_48_from_start	antisense Rv1050 48	Rv1050	1.58285	1.55188	0.264236
MamA	sense_Rv1050_51_from_start	sense Rv1050 51	Rv1050	3.17699	3.16447	0.219798
MamA	89_up_of_Rv1057	intergenic none NA	none	2.77044	2.82786	0.214967
MamA	86_up_of_Rv1057	intergenic none NA	none	2.24603	2.27764	0.20191
MamB	21_down_of_Rv1051c	intergenic none NA	none	2.88359	2.85885	0.231201
HsdM	antisense_Rv1063c_139_to_stop	antisense Rv1063c 943	Rv1063c	2.47396	2.43939	0.279286
HsdM	sense_Rv1063c_146_to_stop	sense Rv1063c 936	Rv1063c	2.42982	2.41967	0.298488
MamA	sense_Rv1069c_742_to_stop	antisense Rv1069c 1021	Rv1069c	2.54897	2.57638	0.203805
MamA	antisense_Rv1069c_745_to_stop	sense Rv1069c 1018	Rv1069c	2.96416	2.94118	0.269865
MamB	antisense_Rv1065_58_from_start	sense Rv1065 58	Rv1065	3.16216	3.15011	0.27174
MamA	antisense_Rv1066_22_from_start	antisense Rv1066 22	Rv1066	2.79237	2.76378	0.222517
MamA	sense_Rv1066_25_from_start	sense Rv1066 25	Rv1066	2.46167	2.45491	0.270332
MamB	sense_echA9_448_to_stop	sense echA9 589	echA9	2.90538	2.86003	0.229796
MamA	sense_echA9_506_from_start	antisense echA9 506	echA9	3.39115	3.35176	0.27076
MamA	antisense_echA9_503_from_start	sense echA9 503	echA9	2.43651	2.45455	0.234624
MamB	antisense_metB_148_from_start	sense metB 148	metB	2.88108	2.85436	0.227652
MamA	antisense_mca_325_from_start	antisense mca 325	mca	3.01818	3.02179	0.244908
MamA	sense_mca_328_from_start	sense mca 328	mca	2.23679	2.26686	0.26816
MamB	antisense_Rv1084_571_from_start	sense Rv1084 571	Rv1084	3.20238	3.18684	0.23387
MamA	antisense_Rv1084_685_from_start	sense Rv1084 685	Rv1084	3.11083	3.13704	0.251431
MamA	sense_Rv1084_688_from_start	antisense Rv1084 688	Rv1084	2.81007	2.78254	0.237094
MamA	antisense_Rv1084_625_to_stop	antisense Rv1084 1396	Rv1084	3.06708	3.03495	0.221481
MamA	sense_Rv1084_622_to_stop	sense Rv1084 1399	Rv1084	2.9379	2.94702	0.220442
MamA	antisense_Rv1086_351_from_start	antisense Rv1086 351	Rv1086	2.03841	2.05165	0.231485
MamA	sense_Rv1086_354_from_start	sense Rv1086 354	Rv1086	2.07734	2.03348	0.274235
MamB	antisense_Rv1086_40_to_stop	sense Rv1086 748	Rv1086	3.01843	3.04624	0.233237
MamA	antisense_Rv1090_152_to_stop	sense Rv1090 303	Rv1090	2.64973	2.62035	0.253575
MamA	sense_Rv1090_149_to_stop	antisense Rv1090 306	Rv1090	3.14673	3.15134	0.286115
MamA	antisense_Rv1090_53_to_stop	antisense Rv1090 402	Rv1090	2.63256	2.68562	0.279225
MamA	sense_Rv1090_50_to_stop	sense Rv1090 405	Rv1090	2.66321	2.68171	0.310617
MamA	sense_coaA_337_to_stop	sense coaA 601	coaA	2.45955	2.48042	0.285036
MamA	antisense_coaA_340_to_stop	antisense coaA 598	coaA	2.58259	2.59492	0.205881
MamA	antisense_glyA1_79_from_start	sense glyA1 79	glyA1	2.92613	2.89123	0.327979
MamA	sense_glyA1_82_from_start	antisense glyA1 82	glyA1	2.38469	2.34613	0.311759
MamB	antisense_glyA1_313_to_stop	sense glyA1 967	glyA1	3.00182	2.98567	0.258506
MamB	antisense_phoH2_640_to_stop	sense phoH2 661	phoH2	2.88398	2.85164	0.231511
MamA	antisense_phoH2_241_to_stop	antisense phoH2 1060	phoH2	2.81165	2.79512	0.244697
MamA	sense_phoH2_238_to_stop	sense phoH2 1063	phoH2	3.30167	3.32659	0.240145
MamA	antisense_Rv1096_269_to_stop	sense Rv1096 606	Rv1096	2.62604	2.60508	0.280132
MamA	sense_Rv1096_266_to_stop	antisense Rv1096 609	Rv1096	2.93485	2.92368	0.271527
MamB	antisense_Rv1096_124_to_stop	sense Rv1096 751	Rv1096	2.71841	2.74844	0.232698
MamA	antisense_Rv1100_36_from_start	antisense Rv1100 36	Rv1100	3.04324	3.05182	0.209173
MamA	sense_Rv1100_39_from_start	sense Rv1100 39	Rv1100	3.22314	3.18997	0.230509
MamB	sense_desA2_385_to_stop	antisense desA2 442	desA2	2.19514	2.21415	0.242654
HsdM	antisense_Rv1101c_169_to_stop	antisense Rv1101c 988	Rv1101c	2.67832	2.61271	0.39604
HsdM	sense_Rv1101c_176_to_stop	sense Rv1101c 981	Rv1101c	2.70262	2.67779	0.410136
MamA	antisense_phoH2_505_to_stop	sense phoH2 796	phoH2	3.12322	3.11595	0.240462
MamA	sense_phoH2_502_to_stop	antisense phoH2 799	phoH2	2.90005	2.87432	0.276146
MamA	antisense_Rv1096_369_from_start	antisense Rv1096 369	Rv1096	2.88023	2.89045	0.282838
MamA	sense_Rv1096_372_from_start	sense Rv1096 372	Rv1096	2.70254	2.6806	0.265629
HsdM	antisense_mazE3_45_to_stop	sense mazE3 275	mazE3	2.47156	2.48139	0.246018
HsdM	sense_mazE3_52_to_stop	antisense mazE3 268	mazE3	2.86289	2.82708	0.2494
MamB	antisense_Rv1104_15_from_start	antisense Rv1104 15	Rv1104	3.22657	3.21893	0.196139
HsdM	sense_Rv1105_178_from_start	sense Rv1105 178	Rv1105	2.71625	2.68057	0.271101
HsdM	antisense_Rv1105_185_from_start	antisense Rv1105 185	Rv1105	2.20019	2.21369	0.211684
MamA	sense_xseB_115_from_start	antisense xseB 115	xseB	3.22735	3.18189	0.258912
MamA	antisense_xseB_112_from_start	sense xseB 112	xseB	2.95389	2.92503	0.280895
MamA	antisense_lytB2_103_to_stop	sense lytB2 904	lytB2	3.50064	3.52385	0.220764
MamA	sense_lytB2_100_to_stop	antisense lytB2 907	lytB2	2.70915	2.71831	0.253392
MamB	antisense_Rv1104_196_to_stop	sense Rv1104 493	Rv1104	2.5489	2.54378	0.194994
MamB	antisense_Rv1111c_189_from_start	sense Rv1111c 189	Rv1111c	2.87768	2.89932	0.266416
MamA	antisense_Rv1112_418_from_start	antisense Rv1112 418	Rv1112	2.7678	2.73449	0.241761
MamA	sense_Rv1112_421_from_start	sense Rv1112 421	Rv1112	3.20677	3.24867	0.256199
MamA	antisense_Rv1112_439_from_start	antisense Rv1112 439	Rv1112	3.19834	3.20561	0.192709
MamA	sense_Rv1112_442_from_start	sense Rv1112 442	Rv1112	2.88769	2.89986	0.216801
MamA	antisense_Rv1112_325_to_stop	sense Rv1112 748	Rv1112	3.24969	3.20595	0.262087
MamA	sense_Rv1112_322_to_stop	antisense Rv1112 751	Rv1112	2.79008	2.79803	0.233915
MamA	sense_Rv1106c_172_from_start	antisense Rv1106c 172	Rv1106c	2.07368	2.07958	0.314105
MamA	antisense_Rv1106c_169_from_start	sense Rv1106c 169	Rv1106c	2.69318	2.72335	0.225662
MamA	sense_Rv1109c_187_from_start	antisense Rv1109c 187	Rv1109c	2.96391	2.95591	0.24352
MamA	antisense_Rv1109c_184_from_start	sense Rv1109c 184	Rv1109c	2.71252	2.71122	0.240218
MamA	sense_Rv1118c_71_to_stop	antisense Rv1118c 627	Rv1118c	2.99342	2.97086	0.260704
MamA	antisense_Rv1118c_74_to_stop	sense Rv1118c 624	Rv1118c	2.80205	2.82902	0.230831
MamA	13_up_of_zwf1	intergenic none NA	none	2.61991	2.63315	0.266804
MamA	10_up_of_zwf1	intergenic none NA	none	1.85255	1.8661	0.231293
MamB	antisense_zwf1_499_from_start	antisense zwf1 499	zwf1	2.62595	2.63997	0.186907
MamA	antisense_zwf1_541_from_start	antisense zwf1 541	zwf1	3.29014	3.29954	0.249415
MamA	sense_zwf1_544_from_start	sense zwf1 544	zwf1	2.23641	2.23227	0.273648
MamB	antisense_Rv1112_493_from_start	antisense Rv1112 493	Rv1112	2.70824	2.71859	0.225338
MamB	antisense_gnd2_75_from_start	antisense gnd2 75	gnd2	2.70786	2.70027	0.197462
MamA	8_up_of_bpoB	intergenic none NA	none	2.60936	2.59857	0.212762
MamA	11_up_of_bpoB	intergenic none NA	none	2.59534	2.61138	0.246951
MamB	antisense_ephC_466_to_stop	sense ephC 484	ephC	3.0663	3.05632	0.267115
MamB	antisense_zwf1_676_from_start	antisense zwf1 676	zwf1	2.67664	2.67242	0.223502
MamA	sense_Rv1128c_448_from_start	antisense Rv1128c 448	Rv1128c	2.74768	2.70781	0.330515
MamA	antisense_Rv1128c_445_from_start	sense Rv1128c 445	Rv1128c	2.35097	2.30545	0.317175
MamA	antisense_Rv1125_397_to_stop	sense Rv1125 847	Rv1125	2.66496	2.65773	0.430109
MamA	sense_Rv1125_394_to_stop	antisense Rv1125 850	Rv1125	2.97482	2.9304	0.322271
MamA	antisense_prpD_708_from_start	antisense prpD 708	prpD	2.07421	2.1045	0.222812
MamA	sense_prpD_711_from_start	sense prpD 711	prpD	3.02387	3.03317	0.235859
MamA	antisense_prpC_289_to_stop	sense prpC 892	prpC	2.97911	2.9798	0.20794
MamA	sense_prpC_286_to_stop	antisense prpC 895	prpC	2.94997	2.93094	0.265603
MamA	antisense_Rv1132_10_from_start	antisense Rv1132 10	Rv1132	2.75612	2.80084	0.318669
MamA	sense_Rv1132_13_from_start	sense Rv1132 13	Rv1132	2.88813	2.91364	0.308364
MamA	antisense_Rv1132_712_to_stop	antisense Rv1132 1018	Rv1132	3.16608	3.13849	0.21199
MamA	sense_Rv1132_709_to_stop	sense Rv1132 1021	Rv1132	2.48932	2.53605	0.238796
MamA	antisense_Rv1132_427_to_stop	antisense Rv1132 1303	Rv1132	3.44057	3.44229	0.218121
MamA	sense_Rv1132_424_to_stop	sense Rv1132 1306	Rv1132	3.13531	3.09529	0.238726
MamA	sense_Rv1128c_118_from_start	antisense Rv1128c 118	Rv1128c	3.08168	3.09594	0.271033
MamA	antisense_Rv1128c_115_from_start	sense Rv1128c 115	Rv1128c	2.90272	2.86318	0.337601
MamB	antisense_metE_454_to_stop	sense metE 1825	metE	3.27771	3.29378	0.275086
MamA	sense_metE_343_from_start	sense metE 343	metE	2.0978	2.12138	0.212805
MamA	antisense_metE_340_from_start	antisense metE 340	metE	3.07717	3.0804	0.278462
MamA	sense_metE_130_from_start	antisense metE 130	metE	2.47625	2.48164	0.247443
MamA	antisense_metE_127_from_start	sense metE 127	metE	3.02261	3.01598	0.217752
MamB	213_up_of_Rv1134	intergenic none NA	none	3.18972	3.14591	0.279395
MamA	sense_metE_913_from_start	sense metE 913	metE	2.24449	2.25282	0.220067
MamA	antisense_metE_910_from_start	antisense metE 910	metE	2.64006	2.63443	0.261374
HsdM	antisense_Rv1148c_190_to_stop	sense Rv1148c 1258	Rv1148c	2.43762	2.41069	0.252913
HsdM	sense_Rv1148c_197_to_stop	antisense Rv1148c 1251	Rv1148c	2.37159	2.36616	0.274201
MamB	sense_Rv1148c_607_from_start	antisense Rv1148c 607	Rv1148c	3.24635	3.24183	0.26821
MamB	367_down_of_Rv1147	intergenic none NA	none	2.93246	2.92447	0.23119
MamA	sense_Rv1154c_250_from_start	antisense Rv1154c 250	Rv1154c	2.67308	2.68094	0.237011
MamA	antisense_Rv1154c_247_from_start	sense Rv1154c 247	Rv1154c	3.21166	3.17937	0.249969
MamA	sense_Rv1148c_269_to_stop	antisense Rv1148c 1179	Rv1148c	2.36082	2.36478	0.276544
MamA	antisense_Rv1148c_272_to_stop	sense Rv1148c 1176	Rv1148c	3.02108	3.00431	0.324332
MamA	60_down_of_Rv1157c	intergenic none NA	none	2.51309	2.49639	0.20971
MamA	57_down_of_Rv1157c	intergenic none NA	none	2.89044	2.85191	0.281076
MamB	53_up_of_Rv1148c	intergenic none NA	none	2.97712	2.9439	0.246014
HsdM	sense_Rv1155_216_to_stop	antisense Rv1155 227	Rv1155	2.61091	2.60521	0.225524
HsdM	antisense_Rv1155_209_to_stop	sense Rv1155 234	Rv1155	2.51122	2.52045	0.219677
MamA	antisense_narG_43_from_start	sense narG 43	narG	3.23413	3.21332	0.300888
MamA	sense_narG_46_from_start	antisense narG 46	narG	3.30694	3.32073	0.289039
MamA	antisense_narG_1742_to_stop	sense narG 1956	narG	3.02616	2.99115	0.306797
MamA	sense_narG_1739_to_stop	antisense narG 1959	narG	3.09996	3.09309	0.259261
MamB	sense_Rv1158c_86_from_start	sense Rv1158c 86	Rv1158c	2.63879	2.6578	0.229871
MamA	antisense_narG_784_to_stop	antisense narG 2914	narG	3.07642	3.13283	0.228677
MamA	sense_narG_781_to_stop	sense narG 2917	narG	2.85411	2.86209	0.23418
MamB	antisense_typA_88_from_start	sense typA 88	typA	3.21684	3.21924	0.2391
MamA	antisense_typA_136_from_start	antisense typA 136	typA	2.95064	2.92574	0.233219
MamA	sense_typA_139_from_start	sense typA 139	typA	3.21571	3.20624	0.290842
MamA	antisense_lpqW_772_to_stop	antisense lpqW 1135	lpqW	3.27445	3.29072	0.239482
MamA	sense_lpqW_769_to_stop	sense lpqW 1138	lpqW	1.75822	1.78621	0.306634
MamA	sense_PPE17_265_to_stop	sense PPE17 775	PPE17	2.3001	2.31435	0.242011
MamA	antisense_PPE17_268_to_stop	antisense PPE17 772	PPE17	3.07285	3.09981	0.204624
MamB	sense_PPE17_296_from_start	antisense PPE17 296	PPE17	3.15283	3.12906	0.226538
MamA	sense_PE12_426_from_start	antisense PE12 426	PE12	2.905	2.89224	0.201668
MamA	antisense_PE12_423_from_start	sense PE12 423	PE12	2.99148	2.98101	0.238594
MamA	antisense_fbiC_544_from_start	sense fbiC 544	fbiC	3.29797	3.33634	0.269978
MamA	sense_fbiC_547_from_start	antisense fbiC 547	fbiC	3.27853	3.30731	0.269058
MamA	sense_fadH_118_to_stop	sense fadH 1906	fadH	2.72046	2.73689	0.223894
MamA	antisense_fadH_121_to_stop	antisense fadH 1903	fadH	2.53389	2.56438	0.232431
HsdM	76_up_of_PE12	intergenic none NA	none	2.82652	2.81496	0.297025
HsdM	83_up_of_PE12	intergenic none NA	none	2.59501	2.60032	0.212717
MamA	sense_Rv1176c_13_to_stop	sense Rv1176c 556	Rv1176c	2.95204	2.94718	0.235491
MamA	antisense_Rv1176c_16_to_stop	antisense Rv1176c 553	Rv1176c	2.93652	2.93682	0.25945
MamB	antisense_Rv1176c_241_to_stop	antisense Rv1176c 328	Rv1176c	3.23463	3.22707	0.287828
MamA	antisense_fbiC_643_from_start	sense fbiC 643	fbiC	3.08686	3.12892	0.258196
MamA	sense_fbiC_646_from_start	antisense fbiC 646	fbiC	2.7469	2.77886	0.259328
MamB	antisense_fbiC_724_from_start	sense fbiC 724	fbiC	2.92831	2.92176	0.269416
MamA	sense_Rv1176c_178_from_start	antisense Rv1176c 178	Rv1176c	3.24683	3.2237	0.219726
MamA	antisense_Rv1176c_175_from_start	sense Rv1176c 175	Rv1176c	3.28951	3.28141	0.261873
MamB	antisense_Rv1178_400_from_start	antisense Rv1178 400	Rv1178	3.07558	3.10104	0.225825
MamA	antisense_pks3_3021_to_stop	sense pks3 3236	pks3	1.96877	1.96447	0.248943
MamA	sense_pks3_3018_to_stop	antisense pks3 3239	pks3	3.028	3.04046	0.299847
MamA	antisense_pks3_1781_to_stop	sense pks3 4476	pks3	3.14023	3.09778	0.295871
MamA	sense_pks3_1778_to_stop	antisense pks3 4479	pks3	3.31217	3.30258	0.265787
MamA	antisense_pks3_646_to_stop	antisense pks3 5611	pks3	2.10512	2.08296	0.429089
MamA	sense_pks3_643_to_stop	sense pks3 5614	pks3	2.11896	2.05934	0.38878
MamA	antisense_papA3_462_to_stop	sense papA3 956	papA3	2.10697	2.09764	0.24016
MamA	sense_papA3_459_to_stop	antisense papA3 959	papA3	2.35357	2.32604	0.404801
MamB	sense_pks3_2110_from_start	sense pks3 2110	pks3	2.74542	2.76774	0.239659
MamB	antisense_mmpL10_544_to_stop	antisense mmpL10 2464	mmpL10	3.07559	3.05716	0.224782
MamA	antisense_mmpL10_431_to_stop	antisense mmpL10 2577	mmpL10	2.93343	2.93048	0.247753
MamA	sense_mmpL10_428_to_stop	sense mmpL10 2580	mmpL10	2.62866	2.62445	0.224488
MamA	antisense_mmpL10_236_to_stop	sense mmpL10 2772	mmpL10	2.91323	2.90824	0.226497
MamA	sense_mmpL10_233_to_stop	antisense mmpL10 2775	mmpL10	3.09888	3.07364	0.327203
MamA	antisense_mmpL10_108_from_start	antisense mmpL10 108	mmpL10	1.7615	1.75594	0.252636
MamA	sense_mmpL10_111_from_start	sense mmpL10 111	mmpL10	2.87981	2.83615	0.402001
MamA	antisense_mmpL10_1288_from_start	antisense mmpL10 1288	mmpL10	2.29521	2.28458	0.402731
MamA	sense_mmpL10_1291_from_start	sense mmpL10 1291	mmpL10	2.87232	2.84194	0.356417
HsdM	sense_rocA_797_to_stop	antisense rocA 834	rocA	0.0839511	0.15185	0.394637
HsdM	antisense_rocA_790_to_stop	sense rocA 841	rocA	0.136651	0.183262	0.345452
MamB	antisense_Rv1186c_181_to_stop	sense Rv1186c 1435	Rv1186c	2.54439	2.52003	0.236525
MamA	antisense_Rv1190_156_from_start	antisense Rv1190 156	Rv1190	3.05547	3.03796	0.229504
MamA	sense_Rv1190_159_from_start	sense Rv1190 159	Rv1190	2.90443	2.92718	0.280525
MamA	antisense_Rv1190_323_to_stop	sense Rv1190 555	Rv1190	2.79686	2.80923	0.247486
MamA	sense_Rv1190_320_to_stop	antisense Rv1190 558	Rv1190	3.12065	3.04779	0.268186
HsdM	sense_Rv1192_337_to_stop	antisense Rv1192 478	Rv1192	2.83102	2.79614	0.269981
HsdM	antisense_Rv1192_330_to_stop	sense Rv1192 485	Rv1192	2.67351	2.65765	0.222688
MamA	antisense_sigI_188_to_stop	sense sigI 684	sigI	2.835	2.82022	0.219547
MamA	sense_sigI_185_to_stop	antisense sigI 687	sigI	2.61779	2.58582	0.234542
MamB	antisense_Rv1194c_205_from_start	antisense Rv1194c 205	Rv1194c	3.07468	3.05339	0.2137
MamB	sense_PPE18_529_to_stop	antisense PPE18 646	PPE18	2.7726	2.76262	0.256006
MamB	antisense_PPE18_52_to_stop	antisense PPE18 1123	PPE18	3.27631	3.28598	0.27336
MamA	antisense_esxL_14_to_stop	sense esxL 270	esxL	3.11385	3.12474	0.307798
MamA	sense_esxL_11_to_stop	antisense esxL 273	esxL	3.24695	3.25814	0.259434
MamA	sense_Rv1194c_618_from_start	antisense Rv1194c 618	Rv1194c	2.85057	2.8381	0.263695
MamA	antisense_Rv1194c_615_from_start	sense Rv1194c 615	Rv1194c	2.41276	2.40535	0.237575
MamA	antisense_esxL_70_from_start	sense esxL 70	esxL	3.19247	3.12735	0.281954
MamA	sense_esxL_73_from_start	antisense esxL 73	esxL	2.52403	2.52116	0.278881
MamB	antisense_dapD_194_to_stop	antisense dapD 759	dapD	2.76015	2.74335	0.185354
HsdM	sense_dapD_207_from_start	antisense dapD 207	dapD	2.53352	2.50909	0.225239
MamA	sense_dapD_17_from_start	antisense dapD 17	dapD	3.1152	3.14102	0.254824
MamA	antisense_dapD_14_from_start	sense dapD 14	dapD	2.592	2.56819	0.266609
MamA	antisense_esxK_132_from_start	antisense esxK 132	esxK	3.11215	3.10381	0.1857
MamA	sense_esxK_135_from_start	sense esxK 135	esxK	2.56366	2.55688	0.222808
MamA	sense_Rv1204c_173_from_start	sense Rv1204c 173	Rv1204c	2.66096	2.71908	0.239723
MamA	antisense_Rv1204c_170_from_start	antisense Rv1204c 170	Rv1204c	3.02281	3.05868	0.254776
HsdM	antisense_dapD_214_from_start	sense dapD 214	dapD	2.59133	2.61233	0.220064
MamB	sense_dapE_443_to_stop	antisense dapE 621	dapE	3.06063	3.09097	0.271431
MamA	sense_Rv1203c_61_from_start	sense Rv1203c 61	Rv1203c	3.27004	3.26145	0.237507
MamA	antisense_Rv1203c_58_from_start	antisense Rv1203c 58	Rv1203c	3.1282	3.11298	0.266799
MamB	sense_Rv1209_181_from_start	sense Rv1209 181	Rv1209	2.33591	2.33322	0.239666
MamA	antisense_Rv1211_45_from_start	sense Rv1211 45	Rv1211	2.64133	2.66062	0.256171
MamA	sense_Rv1211_48_from_start	antisense Rv1211 48	Rv1211	2.06911	2.11282	0.271813
HsdM	sense_Rv1211_98_to_stop	sense Rv1211 129	Rv1211	2.82563	2.83687	0.201679
HsdM	antisense_Rv1211_91_to_stop	antisense Rv1211 136	Rv1211	2.85631	2.87586	0.217328
MamA	antisense_glgC_544_from_start	antisense glgC 544	glgC	2.87879	2.85463	0.306809
MamA	sense_glgC_547_from_start	sense glgC 547	glgC	3.26707	3.24816	0.305572
MamA	antisense_glgC_73_to_stop	antisense glgC 1141	glgC	2.83614	2.86051	0.193062
MamA	sense_glgC_70_to_stop	sense glgC 1144	glgC	2.81196	2.82103	0.225542
HsdM	antisense_Rv1215c_774_to_stop	antisense Rv1215c 911	Rv1215c	2.00426	1.9992	0.168907
HsdM	sense_Rv1215c_781_to_stop	sense Rv1215c 904	Rv1215c	2.16499	2.16444	0.236031
MamA	antisense_tagA_139_from_start	antisense tagA 139	tagA	2.58967	2.59557	0.306326
MamA	sense_tagA_142_from_start	sense tagA 142	tagA	2.42792	2.40323	0.262388
MamA	sense_Rv1215c_70_from_start	sense Rv1215c 70	Rv1215c	3.2347	3.18893	0.271879
MamA	antisense_Rv1215c_67_from_start	antisense Rv1215c 67	Rv1215c	3.31798	3.27302	0.306765
MamA	sense_Rv1217c_133_to_stop	sense Rv1217c 1513	Rv1217c	3.28648	3.26547	0.234313
MamA	antisense_Rv1217c_136_to_stop	antisense Rv1217c 1510	Rv1217c	3.02305	3.00587	0.27544
MamB	antisense_Rv1217c_664_from_start	sense Rv1217c 664	Rv1217c	3.15751	3.15392	0.223308
HsdM	18_up_of_Rv1219c	intergenic none NA	none	2.15915	2.07617	0.508258
HsdM	25_up_of_Rv1219c	intergenic none NA	none	2.24022	2.17548	0.54747
HsdM	antisense_Rv1217c_16_from_start	sense Rv1217c 16	Rv1217c	2.50115	2.52649	0.267566
HsdM	sense_Rv1217c_9_from_start	sense Rv1217c 9	Rv1217c	2.48238	2.46053	0.242648
MamA	sense_Rv1218c_70_to_stop	sense Rv1218c 865	Rv1218c	2.81667	2.83015	0.191629
MamA	antisense_Rv1218c_73_to_stop	antisense Rv1218c 862	Rv1218c	2.72108	2.71983	0.239273
MamA	sense_Rv1219c_88_to_stop	antisense Rv1219c 550	Rv1219c	2.28235	2.29087	0.239618
MamA	antisense_Rv1219c_91_to_stop	sense Rv1219c 547	Rv1219c	2.32726	2.33969	0.260475
MamB	antisense_Rv1226c_640_to_stop	antisense Rv1226c 823	Rv1226c	3.10618	3.10299	0.230081
MamA	antisense_rseA_108_to_stop	sense rseA 356	rseA	2.84326	2.848	0.253256
MamA	sense_rseA_105_to_stop	antisense rseA 359	rseA	2.54595	2.56706	0.257306
HsdM	52_down_of_Rv1231c	intergenic none NA	none	2.20533	2.20789	0.228575
HsdM	45_down_of_Rv1231c	intergenic none NA	none	2.53004	2.54843	0.225272
MamA	sense_Rv1232c_583_to_stop	sense Rv1232c 724	Rv1232c	2.90252	2.86818	0.232157
MamA	antisense_Rv1232c_586_to_stop	antisense Rv1232c 721	Rv1232c	3.27248	3.29146	0.195464
HsdM	antisense_Rv1232c_175_from_start	antisense Rv1232c 175	Rv1232c	2.66693	2.64871	0.192057
HsdM	sense_Rv1232c_168_from_start	sense Rv1232c 168	Rv1232c	1.43045	1.43412	0.269101
HsdM	antisense_lpqY_568_from_start	antisense lpqY 568	lpqY	2.40192	2.42117	0.222028
MamB	sense_Rv1231c_244_from_start	antisense Rv1231c 244	Rv1231c	2.39205	2.39196	0.265828
HsdM	sense_lpqY_561_from_start	sense lpqY 561	lpqY	2.62829	2.61437	0.214156
HsdM	sense_lpqY_220_to_stop	sense lpqY 1186	lpqY	2.81927	2.81473	0.228627
HsdM	antisense_lpqY_213_to_stop	antisense lpqY 1193	lpqY	2.50903	2.51266	0.215846
MamA	antisense_mdh_307_from_start	antisense mdh 307	mdh	3.26512	3.25097	0.245317
MamA	sense_mdh_310_from_start	sense mdh 310	mdh	2.90841	2.88305	0.214229
MamB	antisense_lpqY_289_to_stop	antisense lpqY 1117	lpqY	2.48103	2.49026	0.231372
MamA	sense_corA_86_to_stop	antisense corA 1014	corA	2.1077	2.10274	0.234612
MamA	antisense_corA_89_to_stop	sense corA 1011	corA	2.68171	2.71666	0.244012
MamA	antisense_vapB33_43_to_stop	antisense vapB33 217	vapB33	3.10842	3.04215	0.274342
MamA	sense_vapB33_40_to_stop	sense vapB33 220	vapB33	2.882	2.87691	0.247488
MamB	antisense_sugA_77_to_stop	sense sugA 846	sugA	2.85	2.84783	0.237041
MamA	38_up_of_corA	intergenic none NA	none	3.18722	3.18435	0.262787
MamA	41_up_of_corA	intergenic none NA	none	2.66137	2.61306	0.249259
HsdM	antisense_PE_PGRS23_48_to_stop	sense PE_PGRS23 1640	PE_PGRS23	2.52998	2.50928	0.255303
HsdM	sense_PE_PGRS23_55_to_stop	antisense PE_PGRS23 1633	PE_PGRS23	2.58459	2.56021	0.227915
MamA	sense_Rv1245c_407_to_stop	sense Rv1245c 423	Rv1245c	3.14991	3.1336	0.218298
MamA	antisense_Rv1245c_410_to_stop	antisense Rv1245c 420	Rv1245c	2.26909	2.22772	0.267119
MamB	antisense_Rv1248c_232_to_stop	antisense Rv1248c 3463	Rv1248c	2.79626	2.78588	0.207654
MamA	sense_Rv1248c_1090_to_stop	sense Rv1248c 2605	Rv1248c	2.96705	2.97594	0.239213
MamA	antisense_Rv1248c_1093_to_stop	antisense Rv1248c 2602	Rv1248c	3.10725	3.11123	0.246763
MamA	sense_Rv1248c_1252_to_stop	sense Rv1248c 2443	Rv1248c	2.8518	2.86722	0.247104
MamA	antisense_Rv1248c_1255_to_stop	antisense Rv1248c 2440	Rv1248c	3.12137	3.13333	0.22357
MamA	sense_relB_112_to_stop	sense relB 157	relB	1.72274	1.74103	0.223528
MamA	antisense_relB_115_to_stop	antisense relB 154	relB	3.06198	3.10389	0.21985
MamA	sense_Rv1248c_1846_from_start	antisense Rv1248c 1846	Rv1248c	2.04217	2.05672	0.256704
MamA	antisense_Rv1248c_1843_from_start	sense Rv1248c 1843	Rv1248c	2.96982	2.97416	0.217714
MamA	sense_Rv1248c_1825_from_start	antisense Rv1248c 1825	Rv1248c	2.55111	2.53743	0.25351
MamA	antisense_Rv1248c_1822_from_start	sense Rv1248c 1822	Rv1248c	2.6838	2.67595	0.30638
MamA	sense_Rv1248c_1071_from_start	antisense Rv1248c 1071	Rv1248c	3.05235	3.06479	0.243075
MamA	antisense_Rv1248c_1068_from_start	sense Rv1248c 1068	Rv1248c	3.26338	3.27911	0.270658
MamA	antisense_Rv1248c_403_to_stop	sense Rv1248c 3292	Rv1248c	3.16291	3.18497	0.246065
MamA	antisense_Rv1250_790_from_start	antisense Rv1250 790	Rv1250	2.84808	2.86871	0.235969
MamA	sense_Rv1250_793_from_start	sense Rv1250 793	Rv1250	2.15944	2.14893	0.279627
MamA	sense_Rv1248c_400_to_stop	antisense Rv1248c 3295	Rv1248c	2.79104	2.75008	0.22754
MamB	sense_Rv1250_122_to_stop	antisense Rv1250 1617	Rv1250	3.23531	3.25022	0.262614
MamB	antisense_Rv1251c_1489_from_start	sense Rv1251c 1489	Rv1251c	2.85867	2.80932	0.254462
MamA	sense_Rv1251c_1312_from_start	antisense Rv1251c 1312	Rv1251c	1.82596	1.89371	0.509561
MamA	antisense_Rv1251c_1309_from_start	sense Rv1251c 1309	Rv1251c	1.63061	1.61138	0.646658
HsdM	3_up_of_lprE	intergenic none NA	none	2.43791	2.45722	0.234372
HsdM	10_up_of_lprE	intergenic none NA	none	2.81995	2.79471	0.223761
MamA	sense_Rv1257c_622_to_stop	sense Rv1257c 745	Rv1257c	2.60468	2.65484	0.191658
MamA	antisense_Rv1257c_625_to_stop	antisense Rv1257c 742	Rv1257c	3.1415	3.1302	0.271706
MamB	antisense_deaD_808_from_start	antisense deaD 808	deaD	3.21606	3.1936	0.236222
MamB	antisense_Rv1262c_6_from_start	antisense Rv1262c 6	Rv1262c	2.58114	2.59341	0.213571
MamB	antisense_Rv1257c_456_from_start	sense Rv1257c 456	Rv1257c	3.33989	3.31152	0.275274
MamA	antisense_Rv1264_448_from_start	antisense Rv1264 448	Rv1264	3.09654	3.08936	0.261436
MamA	sense_Rv1264_451_from_start	sense Rv1264 451	Rv1264	2.48071	2.45331	0.262259
MamB	antisense_pknH_606_from_start	antisense pknH 606	pknH	2.66833	2.70008	0.204193
MamA	sense_Rv1272c_571_from_start	sense Rv1272c 571	Rv1272c	3.00821	3.00011	0.266156
MamA	antisense_Rv1272c_568_from_start	antisense Rv1272c 568	Rv1272c	2.69816	2.64313	0.293499
MamA	antisense_Rv1278_1161_to_stop	sense Rv1278 1466	Rv1278	2.13699	2.07327	0.438828
MamA	sense_Rv1278_1158_to_stop	antisense Rv1278 1469	Rv1278	1.3091	1.29482	0.397112
MamA	sense_Rv1290c_423_from_start	sense Rv1290c 423	Rv1290c	3.1276	3.12708	0.229951
MamA	antisense_Rv1290c_420_from_start	antisense Rv1290c 420	Rv1290c	2.71712	2.7477	0.207388
MamB	antisense_Rv1320c_294_from_start	antisense Rv1320c 294	Rv1320c	2.71988	2.70743	0.230325
HsdM	sense_fadA4_21_from_start	antisense fadA4 21	fadA4	2.55165	2.52573	0.231083
HsdM	antisense_fadA4_28_from_start	sense fadA4 28	fadA4	2.41948	2.39778	0.218258
MamA	antisense_fadA4_100_from_start	antisense fadA4 100	fadA4	2.5259	2.47319	0.247787
MamA	sense_fadA4_103_from_start	sense fadA4 103	fadA4	2.86941	2.85522	0.255751
MamA	antisense_Rv1324_114_to_stop	sense Rv1324 800	Rv1324	2.6813	2.62377	0.289567
MamA	sense_Rv1324_111_to_stop	antisense Rv1324 803	Rv1324	2.79984	2.70339	0.292726
MamB	sense_glgE_712_to_stop	antisense glgE 1393	glgE	2.6835	2.7247	0.211743
MamA	antisense_Rv1324_406_from_start	antisense Rv1324 406	Rv1324	1.92227	1.9006	0.271923
MamA	sense_Rv1324_409_from_start	sense Rv1324 409	Rv1324	2.69176	2.6373	0.333437
MamA	sense_PE_PGRS24_617_to_stop	antisense PE_PGRS24 1194	PE_PGRS24	2.42045	2.42216	0.224822
MamA	antisense_PE_PGRS24_620_to_stop	sense PE_PGRS24 1191	PE_PGRS24	2.34261	2.3435	0.217457
MamA	antisense_glgP_352_from_start	sense glgP 352	glgP	2.89227	2.92554	0.27446
MamA	sense_glgP_355_from_start	antisense glgP 355	glgP	2.32845	2.37014	0.227596
MamB	antisense_glgB_224_to_stop	sense glgB 1095	glgB	2.58025	2.59612	0.179052
MamA	sense_dinG_862_to_stop	antisense dinG 1132	dinG	3.35924	3.32821	0.244261
MamA	antisense_dinG_865_to_stop	sense dinG 1129	dinG	3.20809	3.19357	0.203563
MamB	antisense_glgE_245_to_stop	sense glgE 1860	glgE	2.60995	2.61181	0.200448
MamA	antisense_glgP_610_to_stop	antisense glgP 1981	glgP	2.68064	2.675	0.240323
MamA	sense_glgP_607_to_stop	sense glgP 1984	glgP	2.44333	2.42321	0.221868
MamA	antisense_cysM_223_from_start	antisense cysM 223	cysM	2.82503	2.79809	0.28303
MamA	sense_cysM_226_from_start	sense cysM 226	cysM	3.11313	3.11071	0.266892
MamB	antisense_cysM_294_from_start	antisense cysM 294	cysM	2.92727	2.94007	0.233974
HsdM	sense_cysM_454_from_start	sense cysM 454	cysM	2.68496	2.68186	0.238118
HsdM	antisense_cysM_461_from_start	antisense cysM 461	cysM	2.61712	2.60271	0.249926
MamA	antisense_murI_197_to_stop	sense murI 618	murI	2.83695	2.79847	0.239496
MamA	sense_murI_194_to_stop	antisense murI 621	murI	3.12065	3.12073	0.260473
MamA	antisense_cysO_103_from_start	antisense cysO 103	cysO	2.47416	2.45066	0.306385
MamA	sense_cysO_106_from_start	sense cysO 106	cysO	2.69822	2.67803	0.230537
HsdM	sense_mbtM_501_from_start	antisense mbtM 501	mbtM	2.64263	2.62084	0.220803
HsdM	antisense_mbtM_508_from_start	sense mbtM 508	mbtM	2.95504	2.94661	0.234505
MamA	antisense_mbtM_16_to_stop	antisense mbtM 1549	mbtM	2.52024	2.48709	0.207922
MamA	sense_mbtM_13_to_stop	antisense mbtM 1552	mbtM	1.93859	1.94384	0.263444
MamA	antisense_mbtL_37_to_stop	antisense mbtL 283	mbtL	2.91551	2.91566	0.213468
MamA	sense_mbtL_34_to_stop	sense mbtL 286	mbtL	1.93311	1.96495	0.343055
MamA	antisense_irtA_717_to_stop	antisense irtA 1862	irtA	2.5531	2.54158	0.155651
MamA	sense_irtA_714_to_stop	sense irtA 1865	irtA	2.43157	2.40014	0.228392
MamB	23_down_of_irtB	intergenic none NA	none	2.53431	2.5191	0.219009
MamB	antisense_Rv1358_424_from_start	sense Rv1358 424	Rv1358	2.88567	2.88661	0.250972
MamA	sense_Rv1356c_12_to_stop	sense Rv1356c 779	Rv1356c	3.39158	3.3941	0.295842
MamA	antisense_Rv1356c_15_to_stop	antisense Rv1356c 776	Rv1356c	2.6814	2.65329	0.257266
MamA	sense_Rv1357c_269_to_stop	sense Rv1357c 654	Rv1357c	3.22381	3.21808	0.250811
MamA	antisense_Rv1357c_272_to_stop	antisense Rv1357c 651	Rv1357c	2.78903	2.77309	0.259573
MamA	108_up_of_Rv1357c	intergenic none NA	none	2.69154	2.58444	0.286886
MamA	111_up_of_Rv1357c	intergenic none NA	none	2.33061	2.30477	0.257891
MamB	sense_Rv1362c_229_to_stop	sense Rv1362c 433	Rv1362c	3.28216	3.28729	0.295658
MamA	antisense_Rv1359_131_from_start	antisense Rv1359 131	Rv1359	3.25381	3.24151	0.271572
MamA	sense_Rv1359_134_from_start	sense Rv1359 134	Rv1359	2.78397	2.78456	0.245843
MamA	antisense_Rv1359_316_from_start	antisense Rv1359 316	Rv1359	2.65338	2.64827	0.236483
MamA	sense_Rv1359_319_from_start	sense Rv1359 319	Rv1359	3.00482	3.00004	0.232618
HsdM	antisense_Rv1362c_249_from_start	sense Rv1362c 249	Rv1362c	2.48722	2.4674	0.236269
HsdM	sense_Rv1362c_242_from_start	antisense Rv1362c 242	Rv1362c	2.51757	2.52434	0.213494
HsdM	antisense_Rv1364c_768_from_start	antisense Rv1364c 768	Rv1364c	2.44115	2.45228	0.317219
HsdM	sense_Rv1364c_761_from_start	sense Rv1364c 761	Rv1364c	2.38297	2.35532	0.326295
MamB	antisense_Rv1360_370_from_start	antisense Rv1360 370	Rv1360	3.23536	3.24013	0.225279
MamA	sense_Rv1364c_199_from_start	sense Rv1364c 199	Rv1364c	2.55661	2.54671	0.23718
MamA	antisense_Rv1364c_196_from_start	antisense Rv1364c 196	Rv1364c	2.49685	2.5123	0.223757
MamB	antisense_Rv1367c_166_from_start	sense Rv1367c 166	Rv1367c	2.76992	2.80397	0.215232
MamB	antisense_Rv1366_409_from_start	antisense Rv1366 409	Rv1366	2.79586	2.75464	0.227546
MamA	sense_Rv1378c_217_from_start	sense Rv1378c 217	Rv1378c	2.99762	2.9839	0.266596
MamA	antisense_Rv1378c_214_from_start	antisense Rv1378c 214	Rv1378c	3.2613	3.22493	0.247455
MamA	sense_Rv1377c_85_to_stop	antisense Rv1377c 553	Rv1377c	3.13776	3.13941	0.226102
MamA	antisense_Rv1377c_88_to_stop	sense Rv1377c 550	Rv1377c	3.04153	3.08059	0.202369
MamA	antisense_Rv1375_412_to_stop	sense Rv1375 907	Rv1375	3.11579	3.10707	0.265354
MamA	sense_Rv1375_409_to_stop	antisense Rv1375 910	Rv1375	2.01744	2.00056	0.28982
MamB	sense_pyrB_427_from_start	sense pyrB 427	pyrB	2.60815	2.61608	0.189918
MamB	antisense_pyrC_459_from_start	antisense pyrC 459	pyrC	2.58582	2.57132	0.21566
HsdM	sense_pyrC_548_to_stop	antisense pyrC 744	pyrC	1.12952	1.26153	0.685632
HsdM	antisense_pyrC_541_to_stop	sense pyrC 751	pyrC	1.4283	1.32444	0.650125
MamA	antisense_pyrC_184_to_stop	antisense pyrC 1108	pyrC	2.25001	2.27216	0.227207
MamA	sense_pyrC_181_to_stop	sense pyrC 1111	pyrC	2.34917	2.31628	0.335859
MamA	antisense_Rv1382_16_to_stop	sense Rv1382 481	Rv1382	2.81158	2.75273	0.349844
MamA	sense_Rv1382_13_to_stop	antisense Rv1382 484	Rv1382	2.49262	2.5176	0.287457
MamA	antisense_carB_1216_from_start	antisense carB 1216	carB	2.21881	2.21051	0.540201
MamA	sense_carB_1219_from_start	sense carB 1219	carB	2.31751	2.23246	0.515186
MamA	antisense_pyrF_226_from_start	antisense pyrF 226	pyrF	3.16883	3.15883	0.240774
MamA	sense_pyrF_229_from_start	sense pyrF 229	pyrF	3.06461	3.13274	0.30721
MamA	antisense_PPE20_477_from_start	sense PPE20 477	PPE20	2.82602	2.80981	0.23429
MamB	sense_PPE20_94_from_start	antisense PPE20 94	PPE20	2.73325	2.72834	0.230885
MamB	antisense_PPE20_252_from_start	sense PPE20 252	PPE20	2.65085	2.66647	0.20074
MamA	sense_PPE20_480_from_start	antisense PPE20 480	PPE20	2.70792	2.68652	0.224921
MamB	antisense_PPE20_649_from_start	antisense PPE20 649	PPE20	2.52706	2.51005	0.235836
MamA	antisense_metK_580_to_stop	sense metK 631	metK	2.62843	2.59533	0.209652
MamA	sense_metK_577_to_stop	antisense metK 634	metK	2.67137	2.67794	0.238793
MamB	antisense_gmk_54_to_stop	sense gmk 572	gmk	2.63874	2.65204	0.251938
MamA	antisense_dfp_541_from_start	antisense dfp 541	dfp	3.01057	3.03024	0.292444
MamA	sense_dfp_544_from_start	sense dfp 544	dfp	3.33717	3.30616	0.208539
HsdM	sense_Rv1395_505_from_start	sense Rv1395 505	Rv1395	2.7057	2.71787	0.244047
HsdM	antisense_Rv1395_512_from_start	antisense Rv1395 512	Rv1395	2.55476	2.58464	0.243371
MamA	sense_cyp132_556_from_start	antisense cyp132 556	cyp132	2.76698	2.76042	0.226048
MamA	antisense_cyp132_553_from_start	sense cyp132 553	cyp132	3.35377	3.30515	0.286041
HsdM	sense_Rv1395_219_from_start	sense Rv1395 219	Rv1395	2.61626	2.56519	0.465636
HsdM	antisense_Rv1395_226_from_start	antisense Rv1395 226	Rv1395	2.75775	2.72333	0.365376
MamA	antisense_priA_109_to_stop	sense priA 1858	priA	2.50946	2.5164	0.228779
MamA	sense_priA_106_to_stop	antisense priA 1861	priA	2.20629	2.18169	0.287029
MamA	sense_Rv1403c_289_from_start	antisense Rv1403c 289	Rv1403c	3.3537	3.34153	0.25818
MamA	antisense_Rv1403c_286_from_start	sense Rv1403c 286	Rv1403c	2.81665	2.81655	0.195054
MamA	antisense_priA_585_to_stop	antisense priA 1382	priA	2.52732	2.57489	0.227167
MamA	sense_priA_582_to_stop	sense priA 1385	priA	3.04569	3.03846	0.248305
MamA	antisense_priA_259_to_stop	antisense priA 1708	priA	3.23008	3.23966	0.339773
MamA	sense_priA_256_to_stop	sense priA 1711	priA	2.66391	2.6573	0.215864
MamA	antisense_rpe_319_to_stop	sense rpe 379	rpe	3.30824	3.33398	0.292101
MamA	sense_rpe_316_to_stop	antisense rpe 382	rpe	3.12086	3.1288	0.208918
MamA	antisense_ribG_500_to_stop	sense ribG 519	ribG	3.25436	3.23904	0.253456
MamA	sense_ribG_497_to_stop	antisense ribG 522	ribG	2.85166	2.82884	0.261909
MamA	antisense_ribG_485_to_stop	sense ribG 534	ribG	2.7222	2.77104	0.276819
MamA	sense_ribG_482_to_stop	antisense ribG 537	ribG	3.18598	3.22907	0.222614
HsdM	antisense_Rv1410c_121_from_start	sense Rv1410c 121	Rv1410c	2.5498	2.53558	0.221208
HsdM	sense_Rv1410c_114_from_start	antisense Rv1410c 114	Rv1410c	2.79049	2.78024	0.244786
MamA	antisense_whiA_157_to_stop	sense whiA 820	whiA	3.08812	3.09099	0.371264
MamA	sense_whiA_154_to_stop	antisense whiA 823	whiA	2.85025	2.80337	0.25943
MamA	antisense_Rv1422_421_from_start	antisense Rv1422 421	Rv1422	2.6787	2.66112	0.271473
MamA	sense_Rv1422_424_from_start	sense Rv1422 424	Rv1422	2.71185	2.72064	0.258386
MamB	antisense_whiA_377_from_start	antisense whiA 377	whiA	3.26139	3.254	0.240135
MamA	antisense_Rv1425_601_from_start	antisense Rv1425 601	Rv1425	3.21234	3.20475	0.276132
MamA	sense_Rv1425_604_from_start	sense Rv1425 604	Rv1425	3.1638	3.13019	0.250623
HsdM	antisense_fadD12_408_to_stop	sense fadD12 1199	fadD12	2.2174	2.20867	0.244839
HsdM	sense_fadD12_415_to_stop	antisense fadD12 1192	fadD12	2.40163	2.40453	0.192534
MamA	antisense_Rv1425_19_to_stop	antisense Rv1425 1360	Rv1425	3.1897	3.20317	0.251103
MamA	sense_Rv1425_16_to_stop	sense Rv1425 1363	Rv1425	3.04596	3.03324	0.237723
MamA	antisense_Rv1429_221_from_start	sense Rv1429 221	Rv1429	3.20825	3.21441	0.232891
MamA	sense_Rv1429_224_from_start	antisense Rv1429 224	Rv1429	2.80808	2.80324	0.282267
MamA	antisense_Rv1429_349_from_start	antisense Rv1429 349	Rv1429	2.98111	2.91547	0.285362
MamA	sense_Rv1429_352_from_start	sense Rv1429 352	Rv1429	3.0988	3.0952	0.242557
MamB	antisense_Rv1429_421_to_stop	sense Rv1429 847	Rv1429	3.20228	3.17302	0.235302
MamA	antisense_Rv1429_49_to_stop	antisense Rv1429 1219	Rv1429	3.12521	3.14717	0.298349
MamA	sense_Rv1429_46_to_stop	sense Rv1429 1222	Rv1429	2.28193	2.28036	0.242871
HsdM	sense_Rv1429_190_from_start	antisense Rv1429 190	Rv1429	2.78274	2.78347	0.213673
HsdM	antisense_Rv1429_197_from_start	sense Rv1429 197	Rv1429	2.81306	2.78509	0.248418
MamB	antisense_Rv1431_601_from_start	sense Rv1431 601	Rv1431	3.06926	3.07183	0.21745
MamA	antisense_Rv1432_88_from_start	sense Rv1432 88	Rv1432	3.14548	3.1539	0.321592
MamA	sense_Rv1432_91_from_start	antisense Rv1432 91	Rv1432	2.99009	3.01831	0.262609
MamA	antisense_pgk_284_from_start	antisense pgk 284	pgk	3.10195	3.08933	0.237629
MamA	sense_pgk_287_from_start	sense pgk 287	pgk	2.83259	2.81285	0.265511
MamA	antisense_pgk_352_from_start	antisense pgk 352	pgk	3.22947	3.21615	0.219339
MamA	sense_pgk_355_from_start	sense pgk 355	pgk	2.96735	3.00908	0.246807
HsdM	sense_pgk_555_from_start	sense pgk 555	pgk	2.71115	2.71017	0.23117
MamB	antisense_Rv1439c_121_to_stop	antisense Rv1439c 304	Rv1439c	3.13264	3.14114	0.240368
HsdM	antisense_pgk_562_from_start	antisense pgk 562	pgk	2.40008	2.43518	0.228046
MamA	antisense_pgk_565_from_start	antisense pgk 565	pgk	2.52888	2.53626	0.222961
MamA	sense_pgk_568_from_start	sense pgk 568	pgk	3.23938	3.23062	0.231798
HsdM	sense_bisC_962_to_stop	sense bisC 1338	bisC	2.45542	2.48801	0.235023
HsdM	antisense_bisC_955_to_stop	antisense bisC 1345	bisC	2.44639	2.47361	0.220343
MamA	antisense_bisC_1066_to_stop	sense bisC 1234	bisC	3.22783	3.18882	0.241006
MamA	sense_bisC_1063_to_stop	antisense bisC 1237	bisC	3.27143	3.27363	0.271815
MamA	sense_opcA_389_to_stop	sense opcA 522	opcA	3.22344	3.21541	0.317998
MamA	antisense_opcA_392_to_stop	antisense opcA 519	opcA	2.56488	2.56013	0.287886
MamA	sense_zwf2_376_from_start	sense zwf2 376	zwf2	2.80225	2.79004	0.317396
MamA	antisense_zwf2_373_from_start	antisense zwf2 373	zwf2	2.6859	2.61149	0.40625
MamA	22_down_of_Rv1444c	intergenic none NA	none	1.54448	1.59645	0.324317
MamA	19_down_of_Rv1444c	intergenic none NA	none	3.10604	3.13294	0.23825
MamA	sense_tal_37_to_stop	antisense tal 1084	tal	2.86269	2.83465	0.262877
MamA	antisense_tal_40_to_stop	sense tal 1081	tal	2.69988	2.68156	0.246904
MamA	sense_tkt_238_to_stop	antisense tkt 1864	tkt	2.36164	2.3967	0.232934
MamA	antisense_tkt_241_to_stop	sense tkt 1861	tkt	2.64955	2.65661	0.260126
MamA	sense_zwf2_216_from_start	sense zwf2 216	zwf2	2.72373	2.69626	0.222092
MamA	antisense_zwf2_213_from_start	antisense zwf2 213	zwf2	2.70125	2.68447	0.250997
MamA	antisense_Rv1461_416_from_start	sense Rv1461 416	Rv1461	1.57641	1.55331	0.619586
MamA	sense_Rv1461_419_from_start	antisense Rv1461 419	Rv1461	1.68208	1.78523	0.559181
MamA	antisense_Rv1461_472_from_start	sense Rv1461 472	Rv1461	0.612882	0.628437	0.495785
MamA	sense_Rv1461_475_from_start	antisense Rv1461 475	Rv1461	0.635643	0.769752	0.589352
HsdM	sense_Rv1461_552_from_start	antisense Rv1461 552	Rv1461	0.708631	0.76186	0.722096
HsdM	antisense_Rv1461_559_from_start	sense Rv1461 559	Rv1461	0.508418	0.56254	0.673007
MamA	sense_Rv1462_469_to_stop	antisense Rv1462 724	Rv1462	2.67206	2.6763	0.229856
MamA	antisense_Rv1461_49_to_stop	antisense Rv1461 2491	Rv1461	3.11778	3.14171	0.231929
MamA	sense_Rv1461_46_to_stop	sense Rv1461 2494	Rv1461	3.42679	3.41075	0.235206
MamB	antisense_Rv1462_139_from_start	sense Rv1462 139	Rv1462	2.96891	3.00821	0.258928
MamA	antisense_Rv1462_472_to_stop	sense Rv1462 721	Rv1462	2.32968	2.3236	0.260785
MamA	antisense_Rv1462_250_to_stop	sense Rv1462 943	Rv1462	2.79857	2.79503	0.287721
MamA	sense_Rv1462_247_to_stop	antisense Rv1462 946	Rv1462	2.50819	2.48044	0.315771
MamA	antisense_Rv1465_13_from_start	antisense Rv1465 13	Rv1465	2.56795	2.56912	0.32558
MamA	sense_Rv1465_16_from_start	sense Rv1465 16	Rv1465	3.20527	3.15815	0.30692
MamA	74_up_of_csd	intergenic none NA	none	3.3874	3.3988	0.262548
MamA	71_up_of_csd	intergenic none NA	none	3.27965	3.29	0.267913
MamA	sense_fadE15_269_to_stop	antisense fadE15 1560	fadE15	2.78566	2.82312	0.300443
MamA	antisense_fadE15_272_to_stop	sense fadE15 1557	fadE15	2.53353	2.56015	0.230373
MamA	sense_PE_PGRS29_423_to_stop	sense PE_PGRS29 689	PE_PGRS29	1.53264	1.55997	0.288759
MamA	antisense_PE_PGRS29_426_to_stop	antisense PE_PGRS29 686	PE_PGRS29	2.76165	2.76482	0.251962
MamA	antisense_moxR1_127_from_start	sense moxR1 127	moxR1	3.31509	3.30588	0.235705
MamA	sense_moxR1_130_from_start	antisense moxR1 130	moxR1	2.99362	2.94955	0.249636
MamA	antisense_Rv1481_157_from_start	antisense Rv1481 157	Rv1481	3.15031	3.1021	0.215679
MamA	sense_Rv1481_160_from_start	sense Rv1481 160	Rv1481	2.4619	2.48328	0.205489
MamB	antisense_hemZ_314_from_start	antisense hemZ 314	hemZ	2.70336	2.69781	0.245208
MamA	antisense_hemZ_367_to_stop	sense hemZ 667	hemZ	3.11535	3.07108	0.297426
MamA	sense_hemZ_364_to_stop	antisense hemZ 670	hemZ	3.13334	3.11212	0.280568
MamA	antisense_hemZ_70_from_start	antisense hemZ 70	hemZ	2.81599	2.84905	0.23869
MamA	sense_hemZ_73_from_start	sense hemZ 73	hemZ	2.89368	2.86892	0.258927
MamA	antisense_hemZ_193_from_start	antisense hemZ 193	hemZ	3.20448	3.17404	0.290075
MamA	sense_hemZ_196_from_start	sense hemZ 196	hemZ	2.75849	2.74249	0.25342
MamA	antisense_Rv1487_178_to_stop	sense Rv1487 256	Rv1487	3.06252	3.04544	0.309422
MamB	antisense_hemZ_47_to_stop	sense hemZ 987	hemZ	2.75248	2.75147	0.215785
MamA	sense_Rv1487_175_to_stop	antisense Rv1487 259	Rv1487	2.7776	2.8033	0.273699
MamA	antisense_Rv1488_391_from_start	antisense Rv1488 391	Rv1488	3.16693	3.11372	0.258674
MamA	sense_Rv1488_394_from_start	sense Rv1488 394	Rv1488	3.26159	3.28057	0.261304
MamB	antisense_Rv1491c_328_to_stop	antisense Rv1491c 430	Rv1491c	2.77343	2.77954	0.182581
MamA	antisense_mutB_541_to_stop	antisense mutB 1711	mutB	3.13479	3.16835	0.217453
MamA	sense_mutB_538_to_stop	sense mutB 1714	mutB	2.97743	3.0189	0.273408
MamA	antisense_Rv1496_421_to_stop	sense Rv1496 589	Rv1496	3.41167	3.39634	0.209804
MamA	sense_Rv1496_418_to_stop	antisense Rv1496 592	Rv1496	3.28281	3.28975	0.279759
MamA	antisense_Rv1496_28_to_stop	sense Rv1496 982	Rv1496	2.72798	2.71723	0.290987
MamA	sense_Rv1496_25_to_stop	antisense Rv1496 985	Rv1496	2.11535	2.06881	0.271016
HsdM	sense_lipL_260_to_stop	sense lipL 1029	lipL	2.63042	2.56995	0.296206
HsdM	antisense_lipL_253_to_stop	antisense lipL 1036	lipL	2.35668	2.34433	0.319886
MamB	sense_lipL_120_to_stop	sense lipL 1169	lipL	2.6159	2.64486	0.233222
MamA	sense_Rv1498A_10_to_stop	sense Rv1498A 202	Rv1498A	2.99908	2.98156	0.240784
MamA	antisense_Rv1498A_13_to_stop	antisense Rv1498A 199	Rv1498A	2.77029	2.78793	0.259873
MamA	antisense_Rv1500_49_from_start	antisense Rv1500 49	Rv1500	3.13938	3.15494	0.270781
MamA	antisense_Rv1500_142_from_start	antisense Rv1500 142	Rv1500	3.25626	3.23086	0.28511
MamA	sense_Rv1500_145_from_start	sense Rv1500 145	Rv1500	3.22404	3.19408	0.256285
MamA	antisense_Rv1501_115_to_stop	sense Rv1501 706	Rv1501	2.49242	2.45368	0.357282
MamA	sense_Rv1501_112_to_stop	antisense Rv1501 709	Rv1501	3.02776	3.01995	0.343051
MamA	sense_Rv1500_52_from_start	sense Rv1500 52	Rv1500	2.62549	2.64352	0.198684
MamA	antisense_Rv1502_10_to_stop	sense Rv1502 889	Rv1502	2.87596	2.87522	0.316089
MamA	sense_Rv1502_7_to_stop	antisense Rv1502 892	Rv1502	2.47351	2.46915	0.32229
MamB	antisense_Rv1508c_341_to_stop	sense Rv1508c 1458	Rv1508c	2.68597	2.70411	0.256912
MamA	antisense_Rv1507A_120_from_start	antisense Rv1507A 120	Rv1507A	2.54689	2.42735	0.525339
MamA	sense_Rv1507A_123_from_start	sense Rv1507A 123	Rv1507A	2.15106	2.09224	0.428149
HsdM	antisense_Rv1508c_823_to_stop	antisense Rv1508c 976	Rv1508c	2.82289	2.772	0.243704
HsdM	sense_Rv1508c_830_to_stop	sense Rv1508c 969	Rv1508c	2.55835	2.56449	0.23175
MamA	sense_Rv1508c_733_from_start	sense Rv1508c 733	Rv1508c	2.47125	2.48943	0.290854
MamA	antisense_Rv1508c_730_from_start	antisense Rv1508c 730	Rv1508c	2.82836	2.80863	0.255698
MamA	antisense_Rv1510_88_to_stop	antisense Rv1510 1162	Rv1510	3.22044	3.26046	0.289229
MamA	sense_Rv1510_85_to_stop	sense Rv1510 1165	Rv1510	2.94203	2.8772	0.254562
MamB	antisense_Rv1510_283_to_stop	sense Rv1510 967	Rv1510	3.0399	3.02111	0.242779
MamA	antisense_gmdA_119_to_stop	sense gmdA 903	gmdA	3.10273	3.14514	0.281016
MamA	sense_gmdA_116_to_stop	antisense gmdA 906	gmdA	2.54751	2.53419	0.228011
MamA	antisense_gmdA_55_to_stop	sense gmdA 967	gmdA	3.14127	3.15696	0.234602
MamA	sense_gmdA_52_to_stop	antisense gmdA 970	gmdA	2.24838	2.23383	0.284442
MamA	antisense_epiA_280_from_start	antisense epiA 280	epiA	2.34652	2.34641	0.268127
MamA	sense_epiA_283_from_start	sense epiA 283	epiA	2.56115	2.56837	0.256369
MamA	sense_Rv1515c_394_to_stop	sense Rv1515c 502	Rv1515c	2.65257	2.627	0.372999
MamA	antisense_Rv1515c_397_to_stop	antisense Rv1515c 499	Rv1515c	2.82665	2.83088	0.295983
MamA	sense_Rv1515c_442_from_start	antisense Rv1515c 442	Rv1515c	2.73735	2.75258	0.259606
MamA	antisense_Rv1515c_439_from_start	sense Rv1515c 439	Rv1515c	2.21121	2.16916	0.262062
MamA	91_up_of_fadD25	intergenic none NA	none	3.12931	3.12846	0.211183
MamA	88_up_of_fadD25	intergenic none NA	none	2.60603	2.60981	0.245551
MamA	32_up_of_fadD25	intergenic none NA	none	2.8057	2.81131	0.224329
MamA	29_up_of_fadD25	intergenic none NA	none	2.34097	2.32467	0.239792
MamB	antisense_fadD25_34_from_start	sense fadD25 34	fadD25	3.12432	3.12407	0.221913
MamA	53_down_of_mmpL12	intergenic none NA	none	2.36499	2.35199	0.252518
MamA	50_down_of_mmpL12	intergenic none NA	none	2.74139	2.72373	0.232603
HsdM	antisense_mmpL12_694_to_stop	sense mmpL12 2746	mmpL12	2.42714	2.42351	0.229709
HsdM	sense_mmpL12_701_to_stop	antisense mmpL12 2739	mmpL12	2.67865	2.64484	0.248465
MamA	sense_mmpL12_1628_to_stop	sense mmpL12 1812	mmpL12	3.20778	3.20477	0.225271
MamA	antisense_mmpL12_1631_to_stop	antisense mmpL12 1809	mmpL12	2.49273	2.48688	0.248057
MamB	sense_mmpL12_340_from_start	sense mmpL12 340	mmpL12	2.77867	2.78291	0.233414
HsdM	3_up_of_mmpL12	intergenic none NA	none	2.39466	2.36381	0.198187
HsdM	10_up_of_mmpL12	intergenic none NA	none	2.4795	2.501	0.231974
MamA	antisense_Rv1524_64_from_start	sense Rv1524 64	Rv1524	2.72945	2.75789	0.229531
MamA	sense_Rv1524_67_from_start	antisense Rv1524 67	Rv1524	3.42453	3.42785	0.24294
MamB	sense_Rv1526c_89_from_start	sense Rv1526c 89	Rv1526c	2.68253	2.70493	0.223672
MamB	antisense_pks5_130_to_stop	antisense pks5 6196	pks5	2.38493	2.41842	0.241772
MamB	sense_pks5_2547_to_stop	sense pks5 3779	pks5	3.16169	3.19317	0.244275
MamA	sense_pks5_1085_from_start	antisense pks5 1085	pks5	3.11248	3.13718	0.274418
MamA	antisense_pks5_1082_from_start	sense pks5 1082	pks5	2.63531	2.60013	0.28574
HsdM	sense_fadD24_301_from_start	antisense fadD24 301	fadD24	2.54698	2.57755	0.23291
HsdM	antisense_fadD24_308_from_start	sense fadD24 308	fadD24	2.52798	2.50704	0.263872
MamB	antisense_adh_193_to_stop	sense adh 910	adh	3.03808	3.02258	0.23517
MamB	antisense_adh_92_to_stop	antisense adh 1011	adh	2.94256	2.96339	0.200067
MamA	antisense_Rv1533_139_from_start	antisense Rv1533 139	Rv1533	2.98143	2.97983	0.241962
MamA	sense_Rv1533_142_from_start	sense Rv1533 142	Rv1533	2.52667	2.49907	0.237856
MamB	41_up_of_ileS	intergenic none NA	none	2.5049	2.5003	0.245544
MamA	antisense_ileS_1507_from_start	antisense ileS 1507	ileS	3.32274	3.28045	0.286083
MamA	sense_ileS_1510_from_start	sense ileS 1510	ileS	3.13017	3.16286	0.249546
MamA	sense_ansA_265_to_stop	sense ansA 715	ansA	2.33445	2.3326	0.219968
MamA	antisense_ansA_268_to_stop	antisense ansA 712	ansA	3.03631	3.04494	0.259988
MamA	sense_ansA_62_from_start	antisense ansA 62	ansA	2.32354	2.32528	0.200315
MamA	antisense_ansA_59_from_start	sense ansA 59	ansA	2.75916	2.77517	0.268569
MamB	antisense_lprI_253_from_start	sense lprI 253	lprI	3.01275	3.01687	0.257721
MamB	sense_lprI_205_to_stop	sense lprI 388	lprI	2.82774	2.83541	0.221236
MamA	antisense_dnaE1_1315_to_stop	sense dnaE1 2239	dnaE1	3.00911	2.93667	0.289311
MamA	sense_dnaE1_1312_to_stop	antisense dnaE1 2242	dnaE1	2.7982	2.76104	0.238757
MamA	antisense_dnaE1_359_to_stop	antisense dnaE1 3195	dnaE1	2.63963	2.64012	0.244068
MamA	sense_dnaE1_356_to_stop	sense dnaE1 3198	dnaE1	3.16224	3.18039	0.240488
HsdM	antisense_PPE21_703_to_stop	sense PPE21 1333	PPE21	2.38539	2.40523	0.183311
HsdM	sense_PPE21_710_to_stop	antisense PPE21 1326	PPE21	2.39079	2.437	0.209128
MamB	antisense_plsB1_142_from_start	antisense plsB1 142	plsB1	2.91868	2.91163	0.217071
MamB	sense_plsB1_319_from_start	antisense plsB1 319	plsB1	3.10887	3.105	0.244514
MamA	antisense_frdA_787_from_start	antisense frdA 787	frdA	1.34935	1.31319	0.299699
MamA	sense_frdA_790_from_start	sense frdA 790	frdA	2.89315	2.89943	0.210137
MamB	antisense_frdA_614_to_stop	antisense frdA 1137	frdA	2.86613	2.84309	0.206658
HsdM	sense_frdB_195_from_start	sense frdB 195	frdB	2.87814	2.87985	0.237077
HsdM	antisense_frdB_202_from_start	antisense frdB 202	frdB	2.61816	2.59479	0.25118
MamA	antisense_Rv1556_152_to_stop	sense Rv1556 444	Rv1556	2.16742	2.16548	0.262749
MamA	sense_Rv1556_149_to_stop	antisense Rv1556 447	Rv1556	3.19966	3.19654	0.237644
MamB	sense_treY_665_from_start	sense treY 665	treY	2.38545	2.38754	0.206196
HsdM	antisense_Rv1566c_226_from_start	sense Rv1566c 226	Rv1566c	2.59383	2.57874	0.263217
HsdM	sense_Rv1566c_219_from_start	antisense Rv1566c 219	Rv1566c	2.32457	2.31106	0.263653
MamB	antisense_treX_613_to_stop	sense treX 1552	treX	3.07856	3.07118	0.187139
MamA	sense_Rv1566c_262_to_stop	sense Rv1566c 430	Rv1566c	2.27336	2.27457	0.233397
MamA	antisense_Rv1566c_265_to_stop	antisense Rv1566c 427	Rv1566c	3.27636	3.25169	0.25945
MamB	sense_bioA_52_to_stop	sense bioA 1261	bioA	2.88722	2.89039	0.271935
MamB	sense_bioF1_16_from_start	antisense bioF1 16	bioF1	2.21645	2.20172	0.263463
MamB	antisense_Rv1571_198_from_start	antisense Rv1571 198	Rv1571	2.87471	2.85239	0.251756
MamA	antisense_bioB_256_to_stop	sense bioB 793	bioB	2.69769	2.69911	0.222497
MamA	sense_bioB_253_to_stop	antisense bioB 796	bioB	1.25631	1.29934	0.349144
MamA	antisense_Rv1590_112_from_start	antisense Rv1590 112	Rv1590	2.55932	2.51557	0.285083
MamA	sense_Rv1590_115_from_start	sense Rv1590 115	Rv1590	3.05988	3.02507	0.294438
MamA	sense_Rv1592c_484_to_stop	sense Rv1592c 856	Rv1592c	2.98392	2.95452	0.25548
MamA	antisense_Rv1592c_487_to_stop	antisense Rv1592c 853	Rv1592c	3.09878	3.05207	0.238548
MamA	antisense_nadB_433_from_start	sense nadB 433	nadB	2.86754	2.84831	0.241392
MamA	sense_nadB_436_from_start	antisense nadB 436	nadB	2.82912	2.86571	0.243247
MamB	sense_nadB_68_to_stop	sense nadB 1515	nadB	2.99529	2.96322	0.21949
MamB	antisense_hisC1_223_from_start	antisense hisC1 223	hisC1	2.74857	2.74893	0.232938
MamA	antisense_hisC1_154_to_stop	sense hisC1 988	hisC1	1.74601	1.7679	0.308578
MamA	sense_hisC1_151_to_stop	antisense hisC1 991	hisC1	2.3431	2.35513	0.271488
MamA	antisense_hisF_220_from_start	antisense hisF 220	hisF	3.23916	3.19869	0.287621
MamA	sense_hisF_223_from_start	sense hisF 223	hisF	1.71964	1.78386	0.330652
MamB	antisense_hisF_190_to_stop	sense hisF 613	hisF	3.11649	3.13493	0.275177
MamA	sense_bcpB_68_to_stop	antisense bcpB 396	bcpB	2.66389	2.64771	0.324797
MamA	antisense_bcpB_71_to_stop	sense bcpB 393	bcpB	2.4533	2.44922	0.254234
MamA	antisense_trpE_160_from_start	sense trpE 160	trpE	3.18022	3.19953	0.258548
MamA	sense_trpE_163_from_start	antisense trpE 163	trpE	2.70224	2.6902	0.260075
MamB	antisense_lgt_679_to_stop	sense lgt 727	lgt	3.02383	3.01731	0.24387
MamB	antisense_lgt_553_to_stop	sense lgt 853	lgt	2.38672	2.3955	0.219962
MamA	antisense_Rv1619_31_to_stop	antisense Rv1619 1423	Rv1619	3.11828	3.09325	0.257178
[truncated: 2,487 more rows]
