# Supplementary material for: Drivers and sites of diversity in the DNA adenine methylomes of 93 Mycobacterium tuberculosis complex clinical isolates
Source: eLife. 2020 Oct 27;9:e58542. doi: 10.7554/eLife.58542 (PMC7591249; doi:10.7554/eLife.58542)
Supplement: Supplementary file 4. — Sheet one contains all hypervariable motif sites, defined as any site more than 3 SDs above the mean SD size across isolates, calculated using the distribution of log2 (IPD Ratios) at mamB motif sites. It specifies the coordinates with respect to proximal TSSs and CDS, as well as the standard deviation and median across motif sites of the specified genotype. Sheets 2 and 3 hold the CDSs and TSSs implicated in these analyses and the particular set (s) of variable motif sites they belong to. [file elife-58542-supp4.xlsx]

## Sheet: By CDS
MTase	RefLoci	CDSid	CDS	median	mean	sd		Legend
MamA	antisense_dnaA_520_to_stop	antisense dnaA 1003	dnaA	2.99222	2.95627	0.318081		RefLoci	References the distance to the nearest CDS boundary
HsdM	sense_hycE_203_to_stop	sense hycE 1275	hycE	2.56565	2.46467	0.466616		CDSid	Only filled out if the locus is intragenic. The position within the CDS. Numbered with respect to the orientation of the CDS
HsdM	antisense_hycE_196_to_stop	antisense hycE 1282	hycE	2.17559	2.10112	0.538962		CDS	The CDS within which the locus falls
MamA	antisense_PPE1_622_from_start	antisense PPE1 622	PPE1	2.17688	2.15817	0.37592		median	The median log2(IPD Ratio) at the specified locus among all sites with the specified Mtase active
MamA	sense_PPE1_625_from_start	sense PPE1 625	PPE1	2.30702	2.20256	0.427997		mean	The mean log2(IPD Ratio) at the specified locus among all sites with the specified Mtase active
MamA	antisense_fadD10_757_from_start	antisense fadD10 757	fadD10	2.84427	2.78264	0.473882		sd	The standard deviation of log2(IPD Ratio) at the specified locus among all sites with the specified Mtase active
MamA	sense_fadD10_760_from_start	sense fadD10 760	fadD10	2.38988	2.30498	0.395155		All fields referencing log2(IPD Ratio) were calculated using the run-specific scaled IPD Ratio. Every isolate was scaled such that the mean IPD Ratio of all non-motif adenines == 1
MamA	antisense_fadD10_394_to_stop	antisense fadD10 1228	fadD10	3.04207	2.98589	0.352396
HsdM	sense_gca_460_from_start	sense gca 460	gca	1.77602	1.54678	0.781034
HsdM	antisense_gca_467_from_start	antisense gca 467	gca	1.50892	1.31814	0.716231
MamA	antisense_fusA2_751_from_start	antisense fusA2 751	fusA2	2.18289	2.19432	0.346533
MamA	antisense_mce1B_91_to_stop	sense mce1B 949	mce1B	1.79371	1.79838	0.315437
MamA	antisense_lipC_331_to_stop	sense lipC 880	lipC	2.51663	2.43776	0.465234
MamA	sense_lipC_328_to_stop	antisense lipC 883	lipC	2.35258	2.27246	0.421171
MamA	antisense_eccC3_757_from_start	sense eccC3 757	eccC3	2.52607	2.5087	0.320055
MamA	sense_eccC3_888_to_stop	sense eccC3 3104	eccC3	2.71305	2.63612	0.316713
MamA	sense_Rv0316_202_from_start	sense Rv0316 202	Rv0316	3.19417	3.19765	0.314863
MamA	sense_rmlA_148_to_stop	antisense rmlA 718	rmlA	3.0012	3.02064	0.331734
MamA	antisense_rmlA_22_to_stop	sense rmlA 844	rmlA	2.03535	2.04092	0.559686
MamA	sense_rmlA_19_to_stop	antisense rmlA 847	rmlA	1.67344	1.63626	0.465544
MamA	sense_Rv0370c_392_from_start	antisense Rv0370c 392	Rv0370c	2.18999	2.21527	0.428555
MamA	sense_Rv0375c_347_to_stop	sense Rv0375c 513	Rv0375c	2.2119	2.24613	0.543829
MamA	antisense_Rv0375c_350_to_stop	antisense Rv0375c 510	Rv0375c	1.55425	1.52909	0.343835
MamA	sense_fadE7_118_to_stop	antisense fadE7 1069	fadE7	1.10318	1.11346	0.382834
MamA	antisense_fadE7_121_to_stop	sense fadE7 1066	fadE7	1.62084	1.56505	0.586883
MamA	antisense_mmpL1_250_from_start	sense mmpL1 250	mmpL1	2.82704	2.8016	0.317864
MamA	antisense_ctpH_1598_from_start	sense ctpH 1598	ctpH	1.80924	1.81691	0.326583
HsdM	antisense_Rv0446c_290_to_stop	antisense Rv0446c 480	Rv0446c	2.66313	2.66734	0.368829
HsdM	sense_Rv0446c_297_to_stop	sense Rv0446c 473	Rv0446c	2.60906	2.54554	0.358083
MamA	antisense_mmpL4_1187_to_stop	antisense mmpL4 1716	mmpL4	0.433765	0.438349	0.343363
MamA	71_up_of_Rv0452	intergenic none NA	none	2.06255	2.03899	0.388404
MamA	antisense_mmpL2_775_to_stop	antisense mmpL2 2131	mmpL2	2.36502	2.37844	0.360713
MamA	sense_menB_226_to_stop	sense menB 718	menB	2.23283	2.18092	0.367245
MamA	sense_menB_11_from_start	antisense menB 11	menB	2.03908	1.98559	0.553838
MamA	antisense_menB_8_from_start	sense menB 8	menB	1.97372	1.8656	0.478692
MamA	antisense_Rv0552_214_from_start	sense Rv0552 214	Rv0552	2.88096	2.83067	0.347699
MamA	antisense_Rv0561c_393_to_stop	antisense Rv0561c 833	Rv0561c	2.7495	2.68441	0.376873
MamB	antisense_pncB2_217_from_start	antisense pncB2 217	pncB2	1.9832	1.97042	0.343011
HsdM	sense_mce2R_219_to_stop	antisense mce2R 503	mce2R	1.75412	1.65232	0.43911
HsdM	antisense_mce2R_212_to_stop	sense mce2R 510	mce2R	2.04234	1.96614	0.451433
MamA	antisense_mce2C_322_from_start	sense mce2C 322	mce2C	1.97236	1.89038	0.337704
MamA	sense_mce2C_325_from_start	antisense mce2C 325	mce2C	2.01405	2.02866	0.395564
HsdM	8_down_of_Rv0607	intergenic none NA	none	2.08709	2.0036	0.398268
HsdM	15_down_of_Rv0607	intergenic none NA	none	2.25366	2.19232	0.425268
HsdM	sense_recB_943_to_stop	antisense recB 2341	recB	2.68296	2.69037	0.322783
MamA	sense_Rv0634c_283_from_start	antisense Rv0634c 283	Rv0634c	2.48448	2.42387	0.406033
MamA	antisense_Rv0634c_280_from_start	sense Rv0634c 280	Rv0634c	2.83684	2.83745	0.374207
MamA	antisense_fadE8_448_to_stop	antisense fadE8 1180	fadE8	3.01682	2.89527	0.388706
HsdM	sense_Rv0674_298_from_start	sense Rv0674 298	Rv0674	2.14085	2.00135	0.571718
HsdM	antisense_Rv0674_305_from_start	antisense Rv0674 305	Rv0674	2.10039	1.96723	0.530243
MamA	sense_Rv0688_224_to_stop	antisense Rv0688 996	Rv0688	1.53283	1.56619	0.342316
MamA	antisense_Rv0697_367_from_start	sense Rv0697 367	Rv0697	2.64125	2.6359	0.377403
HsdM	sense_Rv0698_255_to_stop	antisense Rv0698 356	Rv0698	2.26501	2.17744	0.380656
HsdM	antisense_Rv0698_248_to_stop	sense Rv0698 363	Rv0698	2.34555	2.26937	0.416739
MamA	sense_fadE9_109_to_stop	antisense fadE9 1063	fadE9	2.70386	2.6109	0.365428
MamA	antisense_fadE9_112_to_stop	sense fadE9 1060	fadE9	2.37871	2.33244	0.38423
HsdM	antisense_Rv0767c_153_to_stop	antisense Rv0767c 488	Rv0767c	2.55172	2.49801	0.339853
HsdM	sense_Rv0767c_160_to_stop	sense Rv0767c 481	Rv0767c	2.77814	2.68976	0.378269
MamA	antisense_aldA_642_from_start	antisense aldA 642	aldA	1.21469	1.2606	0.322938
MamA	antisense_Rv0785_619_from_start	sense Rv0785 619	Rv0785	2.60358	2.56887	0.475064
MamA	sense_Rv0785_622_from_start	antisense Rv0785 622	Rv0785	2.28875	2.26006	0.402873
MamA	antisense_Rv0787A_106_to_stop	sense Rv0787A 133	Rv0787A	3.04771	3.06875	0.348764
MamB	sense_pepC_208_from_start	antisense pepC 208	pepC	2.74168	2.76567	0.375399
MamA	sense_Rv0818_115_from_start	sense Rv0818 115	Rv0818	2.71304	2.75673	0.338445
MamA	6_up_of_desA1	intergenic none NA	none	2.20622	2.14534	0.327167
MamA	9_up_of_desA1	intergenic none NA	none	2.08815	2.07735	0.319664
HsdM	sense_Rv0845_332_to_stop	antisense Rv0845 945	Rv0845	2.61451	2.52391	0.511723
HsdM	antisense_Rv0845_325_to_stop	sense Rv0845 952	Rv0845	2.60196	2.46573	0.568582
MamA	antisense_fadB_1036_to_stop	sense fadB 1126	fadB	3.1263	3.12589	0.344077
MamA	18_up_of_Rv0893c	intergenic none NA	none	2.70726	2.65749	0.346849
MamA	21_up_of_Rv0893c	intergenic none NA	none	2.64059	2.61324	0.324851
MamA	antisense_gltA2_472_to_stop	sense gltA2 823	gltA2	2.8049	2.76297	0.323276
MamA	antisense_echA6_335_to_stop	sense echA6 396	echA6	2.66666	2.64462	0.3293
MamA	sense_echA6_332_to_stop	antisense echA6 399	echA6	2.94549	2.90372	0.358303
MamA	antisense_ctpE_1075_to_stop	sense ctpE 1318	ctpE	3.08999	3.03533	0.409374
MamA	sense_ctpE_1072_to_stop	antisense ctpE 1321	ctpE	3.07128	3.0096	0.389023
MamA	sense_Rv0927c_199_to_stop	sense Rv0927c 592	Rv0927c	1.71316	1.75383	0.332851
MamA	antisense_ligD_681_from_start	sense ligD 681	ligD	2.73437	2.61944	0.33271
MamA	sense_Rv0940c_34_to_stop	sense Rv0940c 832	Rv0940c	2.13439	2.09691	0.405937
MamA	antisense_Rv0940c_37_to_stop	antisense Rv0940c 829	Rv0940c	2.18667	2.15486	0.450527
MamA	antisense_Rv0945_202_to_stop	sense Rv0945 559	Rv0945	2.80218	2.73654	0.414738
MamA	sense_Rv0945_199_to_stop	antisense Rv0945 562	Rv0945	2.95963	2.88268	0.361244
MamA	sense_pgi_649_from_start	sense pgi 649	pgi	2.05853	2.08839	0.390763
MamA	antisense_pgi_646_from_start	antisense pgi 646	pgi	2.74191	2.72192	0.358072
MamA	sense_accA2_151_to_stop	sense accA2 1852	accA2	2.23498	2.25504	0.339508
MamA	antisense_accA2_154_to_stop	antisense accA2 1849	accA2	2.82859	2.80129	0.415075
MamA	sense_accA2_847_from_start	sense accA2 847	accA2	2.74847	2.64677	0.428292
HsdM	sense_pth_173_to_stop	sense pth 402	pth	2.6373	2.6099	0.316206
MamA	antisense_lpqU_229_from_start	antisense lpqU 229	lpqU	2.87386	2.86867	0.326601
MamA	2_up_of_Rv1025	intergenic none NA	none	2.27014	2.29744	0.348102
MamA	7_up_of_Rv1049	intergenic none NA	none	0.729336	0.730523	0.508039
MamA	4_up_of_Rv1049	intergenic none NA	none	1.38823	1.37845	0.437394
MamA	antisense_glyA1_79_from_start	sense glyA1 79	glyA1	2.92613	2.89123	0.327979
HsdM	antisense_Rv1101c_169_to_stop	antisense Rv1101c 988	Rv1101c	2.67832	2.61271	0.39604
HsdM	sense_Rv1101c_176_to_stop	sense Rv1101c 981	Rv1101c	2.70262	2.67779	0.410136
MamA	sense_Rv1106c_172_from_start	antisense Rv1106c 172	Rv1106c	2.07368	2.07958	0.314105
MamA	antisense_Rv1125_397_to_stop	sense Rv1125 847	Rv1125	2.66496	2.65773	0.430109
MamA	sense_Rv1125_394_to_stop	antisense Rv1125 850	Rv1125	2.97482	2.9304	0.322271
MamA	sense_Rv1128c_448_from_start	antisense Rv1128c 448	Rv1128c	2.74768	2.70781	0.330515
MamA	antisense_Rv1128c_445_from_start	sense Rv1128c 445	Rv1128c	2.35097	2.30545	0.317175
MamA	antisense_Rv1128c_115_from_start	sense Rv1128c 115	Rv1128c	2.90272	2.86318	0.337601
MamA	antisense_Rv1132_10_from_start	antisense Rv1132 10	Rv1132	2.75612	2.80084	0.318669
MamA	antisense_Rv1148c_272_to_stop	sense Rv1148c 1176	Rv1148c	3.02108	3.00431	0.324332
MamA	antisense_pks3_646_to_stop	antisense pks3 5611	pks3	2.10512	2.08296	0.429089
MamA	sense_pks3_643_to_stop	sense pks3 5614	pks3	2.11896	2.05934	0.38878
MamA	sense_papA3_459_to_stop	antisense papA3 959	papA3	2.35357	2.32604	0.404801
MamA	sense_mmpL10_111_from_start	sense mmpL10 111	mmpL10	2.87981	2.83615	0.402001
MamA	antisense_mmpL10_1288_from_start	antisense mmpL10 1288	mmpL10	2.29521	2.28458	0.402731
MamA	sense_mmpL10_1291_from_start	sense mmpL10 1291	mmpL10	2.87232	2.84194	0.356417
MamA	sense_mmpL10_233_to_stop	antisense mmpL10 2775	mmpL10	3.09888	3.07364	0.327203
HsdM	sense_rocA_797_to_stop	antisense rocA 834	rocA	0.0839511	0.15185	0.394637
HsdM	antisense_rocA_790_to_stop	sense rocA 841	rocA	0.136651	0.183262	0.345452
HsdM	18_up_of_Rv1219c	intergenic none NA	none	2.15915	2.07617	0.508258
HsdM	25_up_of_Rv1219c	intergenic none NA	none	2.24022	2.17548	0.54747
MamA	sense_Rv1251c_1312_from_start	antisense Rv1251c 1312	Rv1251c	1.82596	1.89371	0.509561
MamA	antisense_Rv1251c_1309_from_start	sense Rv1251c 1309	Rv1251c	1.63061	1.61138	0.646658
MamA	antisense_Rv1278_1161_to_stop	sense Rv1278 1466	Rv1278	2.13699	2.07327	0.438828
MamA	sense_Rv1278_1158_to_stop	antisense Rv1278 1469	Rv1278	1.3091	1.29482	0.397112
MamA	sense_Rv1324_409_from_start	sense Rv1324 409	Rv1324	2.69176	2.6373	0.333437
MamA	sense_mbtL_34_to_stop	sense mbtL 286	mbtL	1.93311	1.96495	0.343055
HsdM	antisense_Rv1364c_768_from_start	antisense Rv1364c 768	Rv1364c	2.44115	2.45228	0.317219
HsdM	sense_Rv1364c_761_from_start	sense Rv1364c 761	Rv1364c	2.38297	2.35532	0.326295
HsdM	sense_pyrC_548_to_stop	antisense pyrC 744	pyrC	1.12952	1.26153	0.685632
HsdM	antisense_pyrC_541_to_stop	sense pyrC 751	pyrC	1.4283	1.32444	0.650125
MamA	sense_pyrC_181_to_stop	sense pyrC 1111	pyrC	2.34917	2.31628	0.335859
MamA	antisense_Rv1382_16_to_stop	sense Rv1382 481	Rv1382	2.81158	2.75273	0.349844
MamA	antisense_carB_1216_from_start	antisense carB 1216	carB	2.21881	2.21051	0.540201
MamA	sense_carB_1219_from_start	sense carB 1219	carB	2.31751	2.23246	0.515186
HsdM	sense_Rv1395_219_from_start	sense Rv1395 219	Rv1395	2.61626	2.56519	0.465636
HsdM	antisense_Rv1395_226_from_start	antisense Rv1395 226	Rv1395	2.75775	2.72333	0.365376
MamA	antisense_priA_259_to_stop	antisense priA 1708	priA	3.23008	3.23966	0.339773
MamA	antisense_whiA_157_to_stop	sense whiA 820	whiA	3.08812	3.09099	0.371264
MamA	antisense_Rv1432_88_from_start	sense Rv1432 88	Rv1432	3.14548	3.1539	0.321592
MamA	22_down_of_Rv1444c	intergenic none NA	none	1.54448	1.59645	0.324317
MamA	sense_opcA_389_to_stop	sense opcA 522	opcA	3.22344	3.21541	0.317998
MamA	sense_zwf2_376_from_start	sense zwf2 376	zwf2	2.80225	2.79004	0.317396
MamA	antisense_zwf2_373_from_start	antisense zwf2 373	zwf2	2.6859	2.61149	0.40625
MamA	antisense_Rv1461_416_from_start	sense Rv1461 416	Rv1461	1.57641	1.55331	0.619586
MamA	sense_Rv1461_419_from_start	antisense Rv1461 419	Rv1461	1.68208	1.78523	0.559181
MamA	antisense_Rv1461_472_from_start	sense Rv1461 472	Rv1461	0.612882	0.628437	0.495785
MamA	sense_Rv1461_475_from_start	antisense Rv1461 475	Rv1461	0.635643	0.769752	0.589352
HsdM	sense_Rv1461_552_from_start	antisense Rv1461 552	Rv1461	0.708631	0.76186	0.722096
HsdM	antisense_Rv1461_559_from_start	sense Rv1461 559	Rv1461	0.508418	0.56254	0.673007
MamA	sense_Rv1462_247_to_stop	antisense Rv1462 946	Rv1462	2.50819	2.48044	0.315771
MamA	antisense_Rv1465_13_from_start	antisense Rv1465 13	Rv1465	2.56795	2.56912	0.32558
HsdM	antisense_lipL_253_to_stop	antisense lipL 1036	lipL	2.35668	2.34433	0.319886
MamA	antisense_Rv1501_115_to_stop	sense Rv1501 706	Rv1501	2.49242	2.45368	0.357282
MamA	sense_Rv1501_112_to_stop	antisense Rv1501 709	Rv1501	3.02776	3.01995	0.343051
MamA	antisense_Rv1502_10_to_stop	sense Rv1502 889	Rv1502	2.87596	2.87522	0.316089
MamA	sense_Rv1502_7_to_stop	antisense Rv1502 892	Rv1502	2.47351	2.46915	0.32229
MamA	sense_Rv1515c_394_to_stop	sense Rv1515c 502	Rv1515c	2.65257	2.627	0.372999
MamA	sense_bioB_253_to_stop	antisense bioB 796	bioB	1.25631	1.29934	0.349144
MamA	sense_hisF_223_from_start	sense hisF 223	hisF	1.71964	1.78386	0.330652
MamA	sense_bcpB_68_to_stop	antisense bcpB 396	bcpB	2.66389	2.64771	0.324797
MamA	sense_pykA_658_from_start	sense pykA 658	pykA	2.68472	2.67253	0.314791
MamA	antisense_pks8_295_from_start	antisense pks8 295	pks8	2.60055	2.5757	0.371926
MamA	sense_pks8_298_from_start	sense pks8 298	pks8	2.78045	2.8098	0.334426
MamA	antisense_pks9_328_to_stop	antisense pks9 2725	pks9	1.76009	1.74838	0.540128
MamA	sense_pks9_325_to_stop	sense pks9 2728	pks9	1.16821	1.26923	0.454722
MamA	sense_Rv1672c_272_to_stop	antisense Rv1672c 1059	Rv1672c	3.08541	3.08387	0.323993
MamA	antisense_Rv1672c_275_to_stop	sense Rv1672c 1056	Rv1672c	2.3997	2.41568	0.385454
MamA	antisense_Rv1701_136_to_stop	sense Rv1701 799	Rv1701	3.18024	3.15208	0.318637
HsdM	sense_Rv1711_101_to_stop	antisense Rv1711 663	Rv1711	2.20022	2.14359	0.381863
HsdM	antisense_Rv1711_94_to_stop	antisense Rv1711 670	Rv1711	2.03262	1.97982	0.397304
MamA	antisense_Rv1739c_453_from_start	antisense Rv1739c 453	Rv1739c	2.54764	2.5167	0.347305
MamA	sense_fadD1_447_to_stop	antisense fadD1 1151	fadD1	2.25331	2.2645	0.387005
MamA	antisense_fadD1_450_to_stop	sense fadD1 1148	fadD1	2.3477	2.27421	0.471987
HsdM	175_up_of_erg3	intergenic none NA	none	1.62101	1.58315	0.357651
HsdM	168_up_of_erg3	intergenic none NA	none	1.37791	1.26468	0.40973
HsdM	sense_gcvB_585_from_start	antisense gcvB 585	gcvB	2.74282	2.71147	0.353383
HsdM	sense_Rv1833c_236_from_start	antisense Rv1833c 236	Rv1833c	2.80699	2.75484	0.316753
HsdM	antisense_Rv1842c_214_from_start	antisense Rv1842c 214	Rv1842c	2.36307	2.26057	0.466816
HsdM	sense_Rv1842c_207_from_start	sense Rv1842c 207	Rv1842c	2.52949	2.37548	0.57024
MamA	sense_guaB1_485_from_start	antisense guaB1 485	guaB1	3.30615	3.27492	0.333291
MamA	10_up_of_Rv1866	intergenic none NA	none	1.32979	1.34762	0.324873
MamA	sense_Rv1868_866_from_start	antisense Rv1868 866	Rv1868	2.79783	2.77677	0.316487
MamB	antisense_cyp140_628_from_start	sense cyp140 628	cyp140	2.05887	2.02639	0.326006
MamA	sense_Rv1885c_143_to_stop	sense Rv1885c 456	Rv1885c	2.44293	2.37562	0.326425
MamA	antisense_Rv1936_400_from_start	antisense Rv1936 400	Rv1936	2.78553	2.80577	0.34786
MamA	sense_Rv1936_403_from_start	sense Rv1936 403	Rv1936	2.40274	2.38765	0.362034
MamB	antisense_Rv1937_144_from_start	antisense Rv1937 144	Rv1937	2.46471	2.46069	0.333337
MamA	antisense_Rv1937_583_to_stop	antisense Rv1937 1936	Rv1937	2.79467	2.75982	0.384697
MamA	sense_Rv1937_580_to_stop	sense Rv1937 1939	Rv1937	2.89365	2.8316	0.348454
MamA	antisense_ephB_460_from_start	antisense ephB 460	ephB	1.95649	1.94422	0.334194
MamA	antisense_Rv1939_191_to_stop	sense Rv1939 324	Rv1939	2.66709	2.59182	0.399698
MamA	antisense_Rv1939_85_to_stop	antisense Rv1939 430	Rv1939	2.89967	2.93	0.318401
MamA	antisense_Rv1945_272_to_stop	antisense Rv1945 1092	Rv1945	2.62959	2.56554	0.513932
MamA	sense_Rv1945_269_to_stop	sense Rv1945 1095	Rv1945	2.03073	1.94929	0.374352
HsdM	antisense_Rv1958c_166_from_start	sense Rv1958c 166	Rv1958c	2.61312	2.52156	0.40466
HsdM	sense_Rv1958c_159_from_start	antisense Rv1958c 159	Rv1958c	2.83427	2.77109	0.358631
MamA	sense_mce3R_382_to_stop	sense mce3R 838	mce3R	2.48334	2.41382	0.347656
MamA	antisense_mce3R_385_to_stop	antisense mce3R 835	mce3R	1.72354	1.66002	0.351995
HsdM	antisense_vapB36_85_to_stop	sense vapB36 175	vapB36	2.69535	2.63596	0.357897
MamA	antisense_ctpF_67_from_start	sense ctpF 67	ctpF	3.0265	2.98756	0.335808
MamA	antisense_Rv2004c_739_from_start	sense Rv2004c 739	Rv2004c	2.13269	2.13812	0.333494
HsdM	sense_otsB1_1775_to_stop	antisense otsB1 2208	otsB1	2.73269	2.53397	0.605604
HsdM	antisense_otsB1_1768_to_stop	sense otsB1 2215	otsB1	2.42978	2.34861	0.575759
MamA	antisense_Rv2008c_649_to_stop	antisense Rv2008c 676	Rv2008c	2.89612	2.82826	0.316764
HsdM	antisense_Rv2037c_183_to_stop	antisense Rv2037c 791	Rv2037c	2.37854	2.30874	0.418718
HsdM	sense_Rv2037c_190_to_stop	sense Rv2037c 784	Rv2037c	2.42507	2.35172	0.365793
HsdM	antisense_Rv2038c_190_from_start	sense Rv2038c 190	Rv2038c	1.62202	1.51367	0.760213
HsdM	sense_Rv2038c_183_from_start	antisense Rv2038c 183	Rv2038c	1.53321	1.49035	0.786782
HsdM	antisense_Rv2047c_455_from_start	antisense Rv2047c 455	Rv2047c	2.46277	2.39172	0.360019
MamA	sense_pks12_6001_to_stop	sense pks12 6454	pks12	2.52249	2.52913	0.327722
MamA	antisense_pks12_6004_to_stop	antisense pks12 6451	pks12	2.81066	2.84227	0.33027
MamA	antisense_Rv2067c_364_to_stop	antisense Rv2067c 859	Rv2067c	2.67076	2.69438	0.338211
HsdM	antisense_cobK_311_from_start	sense cobK 311	cobK	0.223362	0.687819	1.04761
HsdM	sense_cobK_304_from_start	antisense cobK 304	cobK	0.201954	0.705218	1.14107
MamA	antisense_pknJ_659_from_start	sense pknJ 659	pknJ	2.95737	2.9422	0.471749
MamA	sense_pknJ_662_from_start	antisense pknJ 662	pknJ	3.03424	2.99548	0.43829
MamA	sense_pepE_211_from_start	antisense pepE 211	pepE	3.15377	3.09138	0.375927
HsdM	antisense_mshC_126_to_stop	sense mshC 1118	mshC	2.55661	2.46183	0.536641
HsdM	sense_mshC_133_to_stop	antisense mshC 1111	mshC	2.35833	2.19199	0.5693
MamA	antisense_mshC_257_to_stop	antisense mshC 987	mshC	2.64883	2.62772	0.334556
HsdM	11_down_of_TB16.3	intergenic none NA	none	2.42566	2.36365	0.36215
HsdM	4_down_of_TB16.3	intergenic none NA	none	2.74147	2.68376	0.40212
MamA	antisense_Rv2227_78_to_stop	antisense Rv2227 623	Rv2227	1.84785	1.84813	0.365741
MamA	sense_Rv2227_75_to_stop	sense Rv2227 626	Rv2227	2.18881	2.16544	0.389071
HsdM	sense_Rv2307B_114_from_start	antisense Rv2307B 114	Rv2307B	2.39726	2.32768	0.345327
MamA	sense_Rv2319c_53_to_stop	sense Rv2319c 825	Rv2319c	2.39013	2.39982	0.322306
MamA	antisense_Rv2319c_56_to_stop	antisense Rv2319c 822	Rv2319c	2.82579	2.79414	0.316336
MamA	antisense_mbtA_192_to_stop	antisense mbtA 1505	mbtA	2.10543	2.07042	0.534861
MamA	sense_mbtA_189_to_stop	sense mbtA 1508	mbtA	2.55028	2.57321	0.472984
MamA	sense_Rv2426c_256_to_stop	sense Rv2426c 619	Rv2426c	3.28082	3.28821	0.320105
MamA	antisense_echA14_199_to_stop	sense echA14 571	echA14	3.14108	3.10294	0.33376
MamA	antisense_glnQ_220_from_start	antisense glnQ 220	glnQ	2.93733	2.9205	0.316116
MamA	antisense_Rv2567_1072_from_start	antisense Rv2567 1072	Rv2567	2.99049	2.99787	0.345253
MamA	sense_aspS_883_from_start	antisense aspS 883	aspS	3.05859	2.97051	0.417945
MamA	antisense_aspS_880_from_start	sense aspS 880	aspS	2.80012	2.81232	0.346895
MamA	antisense_Rv2575_211_to_stop	sense Rv2575 670	Rv2575	1.7565	1.75956	0.320777
MamA	101_up_of_Rv2576c	intergenic none NA	none	2.31259	2.3358	0.316445
MamA	sense_Rv2618_262_to_stop	antisense Rv2618 415	Rv2618	3.07494	3.04982	0.314063
MamA	antisense_Rv2627c_55_to_stop	sense Rv2627c 1186	Rv2627c	3.13116	3.10396	0.372877
HsdM	sense_arsC_497_to_stop	antisense arsC 999	arsC	2.4975	2.38175	0.365836
HsdM	antisense_arsC_490_to_stop	antisense arsC 1006	arsC	2.30764	2.29466	0.385581
MamA	antisense_ideR_184_from_start	antisense ideR 184	ideR	2.04126	2.08741	0.316638
HsdM	sense_Rv2734_232_to_stop	antisense Rv2734 622	Rv2734	1.46823	1.44465	0.48211
HsdM	antisense_Rv2734_225_to_stop	sense Rv2734 629	Rv2734	2.04155	2.04577	0.35674
MamA	sense_hsdM_652_from_start	antisense hsdM 652	hsdM	3.024	3.03199	0.338919
MamA	antisense_hsdM_649_from_start	sense hsdM 649	hsdM	2.95834	2.8738	0.372172
MamA	antisense_Rv2766c_271_to_stop	antisense Rv2766c 511	Rv2766c	3.03495	3.00066	0.319357
HsdM	antisense_ltp1_244_from_start	sense ltp1 244	ltp1	2.60016	2.55428	0.358442
HsdM	sense_ltp1_237_from_start	antisense ltp1 237	ltp1	2.45991	2.42149	0.322111
MamA	antisense_Rv2812_289_from_start	sense Rv2812 289	Rv2812	3.01879	2.96293	0.388057
MamA	sense_Rv2812_292_from_start	antisense Rv2812 292	Rv2812	2.7894	2.77721	0.319267
MamA	antisense_Rv2813_388_to_stop	sense Rv2813 424	Rv2813	2.02518	2.06195	0.372714
MamA	sense_Rv2813_385_to_stop	antisense Rv2813 427	Rv2813	2.15543	2.1143	0.388221
MamA	sense_Rv2859c_223_from_start	antisense Rv2859c 223	Rv2859c	3.29564	3.29523	0.315432
MamA	antisense_glnA4_258_to_stop	sense glnA4 1115	glnA4	3.0711	3.08333	0.342051
HsdM	antisense_mapB_282_to_stop	antisense mapB 575	mapB	2.21532	2.13086	0.485884
HsdM	sense_mapB_289_to_stop	sense mapB 568	mapB	2.25785	2.17387	0.394195
MamA	antisense_fdhD_91_from_start	antisense fdhD 91	fdhD	3.22972	3.13932	0.324437
HsdM	antisense_fdhF_735_to_stop	sense fdhF 1604	fdhF	1.59924	1.59613	0.630695
HsdM	sense_fdhF_742_to_stop	antisense fdhF 1597	fdhF	1.53956	1.54175	0.63537
HsdM	antisense_fdhF_880_from_start	antisense fdhF 880	fdhF	2.33429	2.22307	0.461879
HsdM	sense_fdhF_873_from_start	sense fdhF 873	fdhF	2.45138	2.29886	0.462397
HsdM	sense_dacB2_73_to_stop	antisense dacB2 802	dacB2	2.66837	2.62986	0.344462
MamA	11_up_of_amt	intergenic none NA	none	2.27187	2.24119	0.387827
HsdM	sense_ppsA_1511_to_stop	antisense ppsA 4119	ppsA	2.19593	2.14327	0.341771
HsdM	antisense_ppsA_1504_to_stop	sense ppsA 4126	ppsA	2.43435	2.35146	0.42552
MamA	antisense_ppsB_379_from_start	antisense ppsB 379	ppsB	2.95057	2.88709	0.336776
MamA	antisense_ppsB_1132_from_start	antisense ppsB 1132	ppsB	2.36407	2.34793	0.365493
MamA	antisense_ppsC_1807_from_start	antisense ppsC 1807	ppsC	2.52087	2.49212	0.31963
MamA	sense_pks1_2398_from_start	antisense pks1 2398	pks1	1.80979	1.80928	0.331273
MamA	sense_fadD22_674_from_start	sense fadD22 674	fadD22	2.70163	2.66575	0.354988
MamA	antisense_fadD22_671_from_start	antisense fadD22 671	fadD22	1.91563	1.9024	0.341733
HsdM	sense_ppk1_813_from_start	antisense ppk1 813	ppk1	2.03752	2.00656	0.450951
HsdM	antisense_ppk1_820_from_start	sense ppk1 820	ppk1	1.51512	1.49143	0.4438
MamA	antisense_ilvB1_142_from_start	sense ilvB1 142	ilvB1	2.34417	2.34864	0.377633
MamB	antisense_iscS_515_to_stop	antisense iscS 666	iscS	2.1989	2.22528	0.325615
MamA	antisense_nrdE_304_from_start	antisense nrdE 304	nrdE	1.92101	1.91369	0.319637
MamA	sense_Rv3079c_76_to_stop	antisense Rv3079c 751	Rv3079c	2.93353	3.01128	0.329175
MamA	antisense_Rv3085_410_to_stop	sense Rv3085 420	Rv3085	2.27447	2.23326	0.356011
MamA	sense_Rv3085_407_to_stop	antisense Rv3085 423	Rv3085	2.931	2.84778	0.342049
MamA	antisense_adhD_334_from_start	antisense adhD 334	adhD	2.66727	2.63031	0.351597
MamA	antisense_moaD1_115_from_start	antisense moaD1 115	moaD1	1.76653	1.77795	0.467402
MamA	sense_moaD1_118_from_start	sense moaD1 118	moaD1	1.94668	1.95416	0.510273
HsdM	1_up_of_Rv3126c	intergenic none NA	none	2.64458	2.60603	0.323437
MamA	antisense_fadE23_115_to_stop	antisense fadE23 1090	fadE23	2.9267	2.90836	0.322787
HsdM	sense_Rv3267_303_from_start	antisense Rv3267 303	Rv3267	2.57963	2.53563	0.388116
HsdM	antisense_Rv3267_310_from_start	sense Rv3267 310	Rv3267	2.23112	2.20638	0.430417
MamA	antisense_add_128_to_stop	antisense add 969	add	2.92334	2.87337	0.334202
MamA	sense_add_304_to_stop	sense add 793	add	3.16435	3.04152	0.414095
MamA	antisense_add_307_to_stop	antisense add 790	add	2.64766	2.53765	0.445504
MamA	sense_sdhA_226_to_stop	sense sdhA 1546	sdhA	2.96832	2.95137	0.396711
HsdM	antisense_Rv3333c_250_to_stop	antisense Rv3333c 595	Rv3333c	2.41285	2.31687	0.487541
HsdM	sense_Rv3333c_257_to_stop	sense Rv3333c 588	Rv3333c	2.66028	2.54337	0.536002
HsdM	sense_metA_384_from_start	sense metA 384	metA	0.722423	0.845655	0.779723
HsdM	antisense_metA_391_from_start	antisense metA 391	metA	0.631595	0.790513	0.714463
MamA	antisense_Rv3394c_19_to_stop	sense Rv3394c 1564	Rv3394c	1.62187	1.64254	0.366735
HsdM	55_up_of_guaA	intergenic none NA	none	2.59533	2.49791	0.426534
HsdM	62_up_of_guaA	intergenic none NA	none	2.62934	2.55988	0.43198
HsdM	antisense_phyA_328_from_start	sense phyA 328	phyA	1.81126	1.71099	0.518283
HsdM	sense_phyA_321_from_start	antisense phyA 321	phyA	2.20809	2.11702	0.592596
MamA	antisense_rpoA_76_from_start	sense rpoA 76	rpoA	2.71329	2.7223	0.340454
HsdM	sense_Rv3486_130_from_start	sense Rv3486 130	Rv3486	2.51336	2.26939	0.620204
HsdM	antisense_Rv3486_137_from_start	antisense Rv3486 137	Rv3486	2.57873	2.31202	0.672697
HsdM	84_up_of_PE_PGRS53	intergenic none NA	none	2.38522	2.38278	0.323458
MamB	sense_PE_PGRS54_112_from_start	sense PE_PGRS54 112	PE_PGRS54	1.54181	1.51419	0.318797
HsdM	sense_ltp3_240_from_start	sense ltp3 240	ltp3	2.72268	2.60182	0.522177
HsdM	antisense_ltp3_247_from_start	antisense ltp3 247	ltp3	2.52757	2.39688	0.487377
MamA	sense_Rv3529c_262_to_stop	sense Rv3529c 892	Rv3529c	2.45438	2.4758	0.427591
MamA	antisense_Rv3529c_265_to_stop	antisense Rv3529c 889	Rv3529c	2.70723	2.63796	0.494903
MamA	sense_Rv3542c_224_to_stop	sense Rv3542c 711	Rv3542c	2.61383	2.57218	0.452638
MamA	antisense_Rv3542c_227_to_stop	antisense Rv3542c 708	Rv3542c	2.45674	2.36873	0.446879
MamA	antisense_fadE31_471_from_start	antisense fadE31 471	fadE31	2.01305	1.99385	0.459636
MamA	sense_fadE31_474_from_start	sense fadE31 474	fadE31	2.68998	2.65568	0.385351
MamA	antisense_lysS_124_to_stop	antisense lysS 1393	lysS	2.76808	2.80175	0.314641
MamA	sense_dppA_235_from_start	sense dppA 235	dppA	1.81158	1.77182	0.332561
MamA	sense_acs_684_from_start	antisense acs 684	acs	2.55935	2.5757	0.381899
MamA	antisense_Rv3719_349_to_stop	antisense Rv3719 1063	Rv3719	2.53022	2.4535	0.418507
MamA	sense_Rv3719_346_to_stop	sense Rv3719 1066	Rv3719	2.06249	2.02395	0.342413
HsdM	antisense_Rv3722c_466_from_start	sense Rv3722c 466	Rv3722c	2.53961	2.44573	0.427025
HsdM	sense_Rv3722c_459_from_start	antisense Rv3722c 459	Rv3722c	2.72808	2.68362	0.394043
MamA	antisense_fadE35_616_from_start	sense fadE35 616	fadE35	2.70993	2.65243	0.324309
MamA	sense_fadE35_619_from_start	antisense fadE35 619	fadE35	2.64036	2.6377	0.315642
MamA	sense_Rv3816c_175_to_stop	sense Rv3816c 604	Rv3816c	3.05912	3.06016	0.390036
MamA	antisense_Rv3816c_178_to_stop	antisense Rv3816c 601	Rv3816c	2.89914	2.82403	0.36725
HsdM	antisense_papA2_135_to_stop	sense papA2 1271	papA2	2.74646	2.60322	0.564893
HsdM	sense_papA2_142_to_stop	antisense papA2 1264	papA2	2.48318	2.41577	0.511551
HsdM	sense_mmpL8_919_to_stop	antisense mmpL8 2350	mmpL8	2.64195	2.62003	0.332708
MamA	antisense_whiB6_45_from_start	antisense whiB6 45	whiB6	2.27134	2.21661	0.448125
HsdM	sense_eccD1_596_to_stop	antisense eccD1 939	eccD1	2.41756	2.25397	0.600002
HsdM	antisense_eccD1_589_to_stop	sense eccD1 946	eccD1	2.03609	1.96347	0.518243
MamA	sense_Rv3903c_603_to_stop	antisense Rv3903c 1937	Rv3903c	2.22445	2.25187	0.317721
HsdM	antisense_PPE6_2602_from_start	sense PPE6 2602	PPE6	2.52932	2.48649	0.327909
HsdM	sense_PPE6_2595_from_start	antisense PPE6 2595	PPE6	1.95832	1.92852	0.32124
MamA	antisense_Rv2484c_349_to_stop	sense Rv2484c 1126	Rv2484c	3.10398	3.14102	0.350056
MamA	antisense_arsB1_493_to_stop	sense arsB1 793	arsB1	3.08762	2.97669	0.36422
MamA	sense_arsB1_490_to_stop	antisense arsB1 796	arsB1	2.7967	2.72876	0.362825
MamA	sense_pyrH_346_from_start	antisense pyrH 346	pyrH	2.37423	2.32365	0.444935
MamA	antisense_pyrH_343_from_start	sense pyrH 343	pyrH	2.53715	2.59506	0.37537
MamB	sense_PE_PGRS57_112_from_start	sense PE_PGRS57 112	PE_PGRS57	1.47371	1.49226	0.332041
MamA	sense_PE_PGRS57_181_from_start	sense PE_PGRS57 181	PE_PGRS57	2.18115	2.23771	0.316052
MamA	antisense_kstD_448_from_start	sense kstD 448	kstD	2.2342	2.22099	0.46672
MamA	sense_kstD_451_from_start	antisense kstD 451	kstD	2.24963	2.2251	0.463671
MamA	antisense_Rv1507A_120_from_start	antisense Rv1507A 120	Rv1507A	2.54689	2.42735	0.525339
MamA	sense_Rv1507A_123_from_start	sense Rv1507A 123	Rv1507A	2.15106	2.09224	0.428149
MamA	sense_Rv2823c_925_to_stop	antisense Rv2823c 1513	Rv2823c	3.14068	3.06114	0.428175
MamA	antisense_Rv2823c_928_to_stop	sense Rv2823c 1510	Rv2823c	2.25711	2.17475	0.372253
MamA	antisense_icd2_19_to_stop	antisense icd2 2181	icd2	3.17968	3.0861	0.342224
MamA	sense_fadD7_757_to_stop	antisense fadD7 820	fadD7	2.47345	2.46502	0.352789
MamA	57_up_of_Rv0378	intergenic none NA	none	3.17332	3.18646	0.315592
MamA	antisense_umaA_136_to_stop	sense umaA 724	umaA	2.70461	2.66698	0.341863
MamA	sense_umaA_133_to_stop	antisense umaA 727	umaA	2.63117	2.63958	0.360169
MamA	antisense_Rv2735c_37_from_start	sense Rv2735c 37	Rv2735c	2.84644	2.81329	0.326845
HsdM	sense_Rv2963_537_to_stop	antisense Rv2963 683	Rv2963	0.599111	0.682039	0.538938
HsdM	antisense_Rv2963_530_to_stop	sense Rv2963 690	Rv2963	0.583402	0.635566	0.631116
MamA	antisense_pks8_1941_to_stop	sense pks8 2867	pks8	1.67009	1.70188	0.562147
MamA	sense_pks8_1938_to_stop	antisense pks8 2870	pks8	1.46736	1.50299	0.486237
MamA	sense_Rv3921c_168_to_stop	sense Rv3921c 893	Rv3921c	2.70012	2.68039	0.321377

## Sheet: By TSS
MTase	RefLoci	TSSid	TSS	median	mean	sd		Legend
MamA	antisense_rmlA_22_to_stop	Rv0336 48	Rv0336	2.03535	2.04092	0.559686		RefLoci	References the distance to the nearest CDS boundary
MamA	sense_rmlA_19_to_stop	Rv0336 45	Rv0336	1.67344	1.63626	0.465544		TSSid	The CDS downstream of the TSS ahead of which the locus falls, and the number of base pairs upstream of the TSS that the targeted adenine is positioned.
MamA	71_up_of_Rv0452	mmpS4 56	mmpS4	2.06255	2.03899	0.388404		TSS	The CDS downstream of the TSS within which the locus falls
HsdM	8_down_of_Rv0607	vapB28 11	vapB28	2.08709	2.0036	0.398268		median	The median log2(IPD Ratio) at the specified locus among all sites with the specified Mtase active
HsdM	15_down_of_Rv0607	vapB28 12	vapB28	2.25366	2.19232	0.425268		mean	The mean log2(IPD Ratio) at the specified locus among all sites with the specified Mtase active
MamA	sense_fadE9_109_to_stop	mmsB 3	mmsB	2.70386	2.6109	0.365428		sd	The standard deviation of log2(IPD Ratio) at the specified locus among all sites with the specified Mtase active
MamA	antisense_fadE9_112_to_stop	mmsB 6	mmsB	2.37871	2.33244	0.38423		All fields referencing log2(IPD Ratio) were calculated using the run-specific scaled IPD Ratio. Every isolate was scaled such that the mean IPD Ratio of all non-motif adenines == 1
MamA	6_up_of_desA1	Rv0823c 97	Rv0823c	2.20622	2.14534	0.327167
MamA	18_up_of_Rv0893c	Rv0893c 19	Rv0893c	2.70726	2.65749	0.346849
MamA	21_up_of_Rv0893c	Rv0893c 22	Rv0893c	2.64059	2.61324	0.324851
MamA	7_up_of_Rv1049	Rv1049 7	Rv1049	0.729336	0.730523	0.508039
MamA	4_up_of_Rv1049	Rv1049 4	Rv1049	1.38823	1.37845	0.437394
HsdM	antisense_Rv1101c_169_to_stop	glpX 5	glpX	2.67832	2.61271	0.39604
HsdM	sense_Rv1101c_176_to_stop	glpX 10	glpX	2.70262	2.67779	0.410136
HsdM	sense_rocA_797_to_stop	Rv1188 96	Rv1188	0.0839511	0.15185	0.394637
HsdM	antisense_rocA_790_to_stop	Rv1188 89	Rv1188	0.136651	0.183262	0.345452
HsdM	18_up_of_Rv1219c	Rv1219c 19	Rv1219c	2.15915	2.07617	0.508258
HsdM	25_up_of_Rv1219c	Rv1219c 26	Rv1219c	2.24022	2.17548	0.54747
MamA	antisense_Rv1501_115_to_stop	Rv1498A 75	Rv1498A	2.49242	2.45368	0.357282
MamA	sense_Rv1501_112_to_stop	Rv1498A 78	Rv1498A	3.02776	3.01995	0.343051
HsdM	175_up_of_erg3	Rv1813c 4	Rv1813c	1.62101	1.58315	0.357651
HsdM	168_up_of_erg3	Rv1813c 11	Rv1813c	1.37791	1.26468	0.40973
MamA	antisense_Rv1937_583_to_stop	ephB 33	ephB	2.79467	2.75982	0.384697
MamA	sense_Rv1937_580_to_stop	ephB 30	ephB	2.89365	2.8316	0.348454
HsdM	sense_otsB1_1775_to_stop	Rv2005c 79	Rv2005c	2.73269	2.53397	0.605604
HsdM	antisense_otsB1_1768_to_stop	Rv2005c 86	Rv2005c	2.42978	2.34861	0.575759
HsdM	antisense_Rv2047c_455_from_start	lipT 4	lipT	2.46277	2.39172	0.360019
HsdM	11_down_of_TB16.3	Rv2184c 56	Rv2184c	2.42566	2.36365	0.36215
HsdM	4_down_of_TB16.3	Rv2184c 63	Rv2184c	2.74147	2.68376	0.40212
MamA	antisense_mbtA_192_to_stop	mbtJ 24	mbtJ	2.10543	2.07042	0.534861
MamA	sense_mbtA_189_to_stop	mbtJ 21	mbtJ	2.55028	2.57321	0.472984
MamA	antisense_aspS_880_from_start	Rv2573 99	Rv2573	2.80012	2.81232	0.346895
MamA	antisense_Rv2627c_55_to_stop	hrp1 22	hrp1	3.13116	3.10396	0.372877
HsdM	antisense_fdhF_735_to_stop	fdhD 81	fdhD	1.59924	1.59613	0.630695
HsdM	sense_fdhF_742_to_stop	fdhD 88	fdhD	1.53956	1.54175	0.63537
MamA	sense_fadD22_674_from_start	pks15 89	pks15	2.70163	2.66575	0.354988
MamA	antisense_fadD22_671_from_start	pks15 92	pks15	1.91563	1.9024	0.341733
HsdM	1_up_of_Rv3126c	Rv3127 13	Rv3127	2.64458	2.60603	0.323437
HsdM	84_up_of_PE_PGRS53	PE_PGRS53 19	PE_PGRS53	2.38522	2.38278	0.323458
MamA	sense_Rv3529c_262_to_stop	Rv3528c 98	Rv3528c	2.45438	2.4758	0.427591
MamA	sense_Rv2319c_53_to_stop	Rv2315c 19	Rv2315c	2.39013	2.39982	0.322306
MamA	antisense_Rv2319c_56_to_stop	Rv2315c 22	Rv2315c	2.82579	2.79414	0.316336
