# Supplementary material for: Drivers and sites of diversity in the DNA adenine methylomes of 93 Mycobacterium tuberculosis complex clinical isolates
Source: eLife. 2020 Oct 27;9:e58542. doi: 10.7554/eLife.58542 (PMC7591249; doi:10.7554/eLife.58542)
Supplement: Supplementary file 5. — MTase motif site loci were assigned by our methylome annotation pipeline, using proximal H37Rv gene references transferred by Rapid Annotation Transfer Tool (RATT). Consistently hypomethylated loci were classified as unmodified by our Bayesian analysis in a significant number of isolates in which the relevant MTase was mostly active. Significance was calculated using cumulative binomial test, setting the number of MTase-active isolates where a locus was present as the number of trials, and the number of said isolates where the locus was hypomethylated as the number of successes. At a 0.01 significance level, the threshold p-value for significance was 4.72E-07, after a Bonferroni correction for the number of loci tested. Sheet one contains hypomethylated MamA motif site loci. Sheet two contains the hypomethylated MamB loci, and sheet three contains hypomethylated HsdM loci. [file elife-58542-supp5.xlsx]

## Sheet: hypo-mama
CDS	Sense	Position	Hypomethylated	All	P-value	Nearby Motif		Supplementary Data 5: Hypomethylation analysis
mmpL4	sense	1719	51	51	2.17826e-126	No		Consistently hypomethylated MTase motif site loci across 93 clinical isolates. MTase motif site loci were assigned by our methylome annotation pipeline, using proximal H37Rv gene references transferred by RATT. Consistently hypomethylated loci were classified as unmodified by our Bayesian analysis in a significant number of isolates in which the relevant MTase was mostly active. Significance was …
mmpL4	antisense	1716	49	51	2.33672e-118	No
Rv1049	upstream	7	39	51	1.22701e-85	No
Rv1461	antisense	472	38	50	2.73095e-83	Yes
Rv1461	sense	475	35	50	1.23593e-74	Yes
treZ	antisense	1272	31	35	2.14038e-72	No
treZ	sense	1275	26	35	5.92888e-57	No
accE5	downstream	447	20	33	2.88804e-41	No
PPE34	sense	1664	13	20	7.05078e-28	No
mptA	sense	23	14	31	8.0244e-27	No
accA1	sense	598	13	25	4.65494e-26	Yes
Rv3282	antisense	325	12	18	4.9305e-26	No
fadE7	sense	1069	13	43	3.09114e-22	Yes
pks9	sense	2728	13	50	2.93266e-21	No
bioB	sense	796	11	49	2.03632e-17	No
treZ	upstream	880	8	13	2.46189e-17	No
Rv1461	antisense	416	10	50	2.07856e-15	Yes
Rv1278	sense	1469	9	44	4.24545e-14	No
Rv1049	upstream	4	9	51	1.78287e-13	No
PPE34	antisense	1661	7	20	4.21414e-13	No
Rv2018	upstream	1662	7	24	1.85898e-12	No
fadE7	antisense	1066	8	43	2.53081e-12	Yes
aldA	antisense	642	8	48	6.486e-12	No
Rv0370c	antisense	389	8	50	9.17186e-12	Yes
frdA	antisense	787	8	51	1.08451e-11	No
PPE34	sense	3454	4	4	1.39369e-10	No
Rv1251c	antisense	1309	7	46	2.69087e-10	No
accA1	antisense	595	6	25	2.75514e-10	Yes
treZ	upstream	877	5	13	6.02318e-10	No
PPE34	sense	1439	4	6	2.07906e-09	No
Rv1866	upstream	10	6	48	1.78409e-08	No
Rv0674	sense	712	6	51	2.59529e-08	No
treY	antisense	1409	3	3	4.05624e-08	No
Rv2172c	upstream	37	4	14	1.35722e-07	No

## Sheet: hypo-mamb
CDS	Sense	Position	Hypomethylated	All	P-value	Nearby Motif
PE_PGRS54	sense	112	10	68	8.16436e-24	No
PE_PGRS57	sense	112	9	68	3.93884e-21	No

## Sheet: hypo-hsdm
CDS	Sense	Position	Hypomethylated	All	P-value	Nearby Motif
rocA	antisense	841	67	70	2.49105e-99	No
rocA	sense	834	67	70	2.49105e-99	No
cobK	antisense	311	50	68	6.15018e-62	Yes
cobK	sense	304	50	68	6.15018e-62	Yes
Rv1461	antisense	559	47	70	3.1698e-55	No
Rv2963	antisense	690	46	70	2.10151e-53	No
Rv2963	sense	683	46	70	2.10151e-53	No
PPE24	antisense	2275	33	33	1.31422e-51	No
PPE24	sense	2268	32	33	1.46816e-48	No
metA	antisense	391	42	70	2.20109e-46	No
metA	sense	384	40	70	4.99591e-43	No
Rv1461	sense	552	37	70	3.51482e-38	No
pks6	sense	423	26	34	1.18381e-33	No
PPE24	antisense	1807	17	17	6.14333e-27	No
Rv3180c	downstream	1681	16	16	2.13926e-25	Yes
pks6	sense	424	21	32	3.971e-25	No
PPE24	sense	1800	16	17	3.53844e-24	No
Rv3180c	downstream	1675	13	13	9.03313e-21	Yes
Rv3180c	downstream	1682	13	13	9.03313e-21	Yes
Rv3180c	downstream	1688	13	13	9.03313e-21	Yes
Rv3180c	downstream	4992	13	13	9.03313e-21	No
Rv3180c	downstream	4999	13	13	9.03313e-21	No
pyrC	sense	744	20	70	5.90016e-15	No
Rv3179	upstream	3360	9	9	1.32823e-14	No
Rv3179	upstream	36	9	9	1.32823e-14	Yes
Rv3179	upstream	42	9	9	1.32823e-14	Yes
Rv3179	upstream	43	9	9	1.32823e-14	Yes
Rv3179	upstream	49	9	9	1.32823e-14	Yes
gca	antisense	467	19	69	5.89221e-14	No
pks6	antisense	431	14	32	7.50321e-14	No
pyrC	antisense	751	19	70	7.86754e-14	No
Rv3186	upstream	5182	8	8	4.62521e-13	Yes
Rv3186	upstream	5188	8	8	4.62521e-13	Yes
Rv3186	upstream	5189	8	8	4.62521e-13	Yes
Rv3186	upstream	5195	8	8	4.62521e-13	Yes
Rv3188	upstream	6723	8	8	4.62521e-13	Yes
Rv3179	upstream	3353	8	9	4.05643e-12	No
Rv3190c	downstream	13071	7	7	1.61061e-11	No
Rv3190c	downstream	13078	7	7	1.61061e-11	No
Rv3190c	downstream	9754	7	7	1.61061e-11	Yes
Rv3190c	downstream	9760	7	7	1.61061e-11	Yes
Rv3190c	downstream	9761	7	7	1.61061e-11	Yes
Rv3190c	downstream	9767	7	7	1.61061e-11	Yes
Rv2279	antisense	693	10	21	1.00603e-10	No
Rv3186	upstream	8499	7	8	1.25611e-10	No
Rv3186	upstream	8506	7	8	1.25611e-10	No
lpqG	upstream	93	14	54	2.84756e-10	No
Rv3188	upstream	6717	6	6	5.60852e-10	Yes
Rv3188	upstream	6724	6	6	5.60852e-10	Yes
Rv3188	upstream	6730	6	6	5.60852e-10	Yes
Rv2279	sense	686	9	21	2.85271e-09	No
gca	sense	460	14	69	9.04801e-09	No
Rv2038c	sense	183	14	69	9.04801e-09	No
Rv3188	upstream	10034	5	5	1.95302e-08	No
Rv3188	upstream	10041	5	5	1.95302e-08	No
PPE24	antisense	1591	5	5	1.95302e-08	No
PPE24	sense	1584	5	5	1.95302e-08	No
pks6	antisense	430	9	34	3.62811e-07	No
