# Supplementary material for: Drivers and sites of diversity in the DNA adenine methylomes of 93 Mycobacterium tuberculosis complex clinical isolates
Source: eLife. 2020 Oct 27;9:e58542. doi: 10.7554/eLife.58542 (PMC7591249; doi:10.7554/eLife.58542)
Supplement: Supplementary file 6. — Sheets 1 and 3 are organized locus-wise, with frequencies of common loci and their overlap with Sigma-factor consensus motifs are each locus for –10 and –35 consensus sigma factor binding sites. Sheets 2 and 4 use the same underlying data as 1 and 3 but report the frequencies of relative distances upstream of TSS that MTase motifs and SFBSs overlap. Sheet five is similar to sheets 1 and 3, but instead reports all MTase motif sites within 100 bp of TSSs, rather than only the subset that overlap SFBSs. Sheet six lists all loci found across 30 or more isolates that fall within 50 base pairs upstream of a TSS, and for each Sigma Factor lists whether it overlaps with the –10 or –35 motifs, and whether it overlaps with a sigma factor in an arrangement indicative of a true promoter. Sheet seven is similar to six but each row represents a promoter containing at least one MTase motif. [file elife-58542-supp6.xlsx]

## Sheet: -10 SFBS motif sites filtered
TSS	bp upstream	MTase	sigA	sigB	sigC	sigF	sigG	sigI	sigJ		Legend
Rv0004	48	MamA	0	93	0	0	0	0	0		TSS	The gene immediately downstream of the TSS.
Rv0004	45	MamA	0	93	0	0	0	93	0		bp upstream	# bases that the methylation motif is upstream of the TSS. Strand is not taken into account, since DNA methylation can influence transcriptional activity regardless of strand.
gyrB	18	HsdM	0	0	0	0	91	91	0		MTase	Which Mtase the methylaiton motif belongs to
gyrB	13	HsdM	91	0	0	0	0	0	0		sigA-J	Number of isolates with a methylation motif at the specified locus, ovrelapping with the consensus binding motif of the specified sigma factor
no_downstream_cds	20	MamA	0	88	0	0	0	0	0
no_downstream_cds	23	MamA	0	85	0	0	0	85	0
Rv0007	8	MamB	0	91	0	0	0	91	0
Rv0007	96	HsdM	0	0	0	91	0	91	0
fhaA	97	MamB	0	91	0	0	0	0	0
whiB5	71	HsdM	0	91	0	0	0	91	0
Rv0029	12	HsdM	91	0	0	0	0	91	0
Rv0039c	4	MamA	0	92	0	0	0	92	0
Rv0039c	7	MamA	0	92	0	0	0	0	0
rpsF	62	MamA	0	92	0	0	0	0	0
rpsF	59	MamA	0	92	0	0	0	0	0
Rv0061c	5	HsdM	0	0	0	0	0	87	0
Rv0061c	12	HsdM	87	0	0	0	0	0	0
Rv0068	91	MamA	0	70	0	0	0	0	0
Rv0068	88	MamA	0	70	0	0	0	0	0
no_downstream_cds	55	HsdM	0	0	0	0	0	94	0
no_downstream_cds	62	HsdM	0	92	0	0	0	93	0
mtn	61	MamA	0	93	0	0	0	0	0
mtn	58	MamA	0	93	0	0	0	93	0
no_downstream_cds	34	MamA	0	93	0	0	0	93	0
no_downstream_cds	37	MamA	0	273	0	0	0	87	0
no_downstream_cds	27	MamA	0	93	0	0	0	0	93
no_downstream_cds	24	MamA	0	186	0	0	0	93	0
Rv0102	7	MamA	93	93	0	0	0	0	0
Rv0102	4	MamA	0	93	0	0	0	0	0
no_downstream_cds	15	MamA	0	90	0	0	0	3	0
no_downstream_cds	18	MamA	0	90	0	0	0	0	0
Rv0108c	42	MamB	0	92	0	0	0	0	0
Rv0108c	34	MamA	0	92	0	0	0	0	0
Rv0108c	37	MamA	0	92	0	0	0	0	0
fadD7	40	MamA	0	87	0	0	0	87	0
fadD7	37	MamA	0	87	0	0	0	0	0
cyp138	36	MamA	0	92	0	0	0	0	0
cyp138	33	MamA	0	92	0	0	0	92	0
Rv0138	7	MamA	93	93	0	0	0	93	0
Rv0138	4	MamA	0	93	0	0	0	0	0
Rv0142	8	MamA	0	91	0	0	0	0	0
Rv0142	5	MamA	0	91	0	0	0	0	0
Rv0149	2	MamA	0	87	0	0	0	0	0
pntAa	83	MamA	0	92	0	0	0	0	0
pntAa	80	MamA	0	92	0	0	0	0	0
PE4	5	MamA	0	89	0	0	0	0	0
PE4	8	MamA	89	89	0	0	0	0	0
Rv0176	40	MamB	0	90	0	0	0	0	0
lprO	49	MamB	0	93	0	0	0	0	0
Rv0190	16	MamB	0	92	0	0	0	0	0
Rv0190	95	MamA	0	91	0	0	0	91	0
Rv0190	92	MamA	0	91	0	0	0	0	0
mmpL11	57	MamA	0	93	0	0	0	0	0
mmpL11	60	MamA	0	93	0	0	0	0	0
Rv0209	83	MamB	0	93	0	0	0	0	0
Rv0247c	15	MamA	0	87	0	0	0	87	0
Rv0247c	18	MamA	0	87	0	0	0	0	0
Rv0250c	5	HsdM	0	0	0	0	0	93	0
Rv0250c	12	HsdM	93	0	0	0	0	93	0
Rv0268c	88	MamA	0	93	0	0	0	0	0
Rv0268c	91	MamA	0	93	0	0	0	0	0
vapB25	52	MamA	0	91	0	0	0	91	0
vapB25	49	MamA	0	91	0	0	0	0	0
Rv0281	39	MamA	0	88	0	0	0	0	0
Rv0281	36	MamA	0	88	0	0	0	88	0
no_downstream_cds	40	MamA	0	265	0	0	0	0	0
no_downstream_cds	43	MamA	0	86	0	0	0	85	0
PE_PGRS5	43	MamA	0	85	0	0	0	0	0
PE_PGRS5	40	MamA	0	85	0	0	0	0	0
Rv0306	30	MamA	0	91	0	0	0	0	0
Rv0306	27	MamA	0	91	0	0	0	91	0
Rv0318c	0	MamA	0	86	0	0	0	0	0
Rv0336	48	MamA	0	82	0	0	0	0	0
Rv0336	45	MamA	0	82	0	0	0	0	0
iniA	35	MamA	0	90	0	0	0	0	0
iniA	32	MamA	0	90	0	0	0	0	0
ansP2	43	MamA	0	86	0	0	0	0	0
ansP2	46	MamA	0	86	0	0	0	0	0
Rv0349	71	MamA	0	93	0	0	0	0	0
Rv0349	68	MamA	0	93	0	0	0	93	0
ansP2	70	MamA	0	91	0	0	0	0	0
ansP2	73	MamA	0	91	0	0	0	91	0
Rv0358	53	MamA	0	86	0	0	0	86	0
Rv0358	50	MamA	0	86	0	0	0	0	0
Rv0365c	4	MamA	0	92	0	0	0	92	0
Rv0365c	7	MamA	0	92	0	0	0	0	0
Rv0368c	52	MamA	0	92	0	0	0	92	0
Rv0368c	55	MamA	0	92	0	0	0	0	0
Rv0368c	77	MamA	0	92	0	0	0	0	0
Rv0368c	80	MamA	0	92	0	0	0	0	0
Rv0368c	96	MamA	0	92	0	0	0	0	0
pks6	30	MamA	0	80	0	0	0	0	0
pks6	27	MamA	0	80	0	0	0	80	0
Rv0443	83	MamA	0	89	0	0	0	0	0
Rv0443	80	MamA	0	89	0	0	0	0	0
Rv0446c	0	MamB	0	92	0	0	0	92	0
mmpS4	56	MamA	0	93	0	0	0	0	0
mmpS4	7	MamA	93	93	0	0	0	0	0
mazF1	9	HsdM	93	0	0	0	0	0	0
mazF1	16	HsdM	0	0	0	0	0	93	0
Rv0465c	4	MamA	0	87	0	0	0	87	0
Rv0465c	7	MamA	0	87	0	0	0	0	0
Rv0474	21	MamB	0	93	0	0	0	0	0
mshA	78	MamA	0	74	0	0	0	0	0
mshA	75	MamA	0	74	0	0	0	74	0
Rv0497	55	MamB	0	88	0	0	0	0	0
Rv0495c	97	HsdM	89	89	0	0	0	0	0
hemA	64	MamB	0	92	0	0	0	0	0
fabH	87	MamB	0	93	0	0	0	0	0
fabH	97	HsdM	0	0	0	0	0	93	0
Rv0565c	36	MamA	0	93	0	0	0	0	0
Rv0565c	39	MamA	0	93	0	0	0	0	0
Rv0572c	54	MamA	0	91	0	0	0	0	0
Rv0572c	57	MamA	0	91	0	0	0	91	0
lpqN	96	MamB	0	93	0	0	0	0	0
Rv0585c	23	MamB	0	93	0	0	0	0	0
no_downstream_cds	96	MamA	0	93	0	0	0	0	0
vapB28	11	HsdM	0	0	0	0	0	93	0
vapB28	12	HsdM	93	0	0	0	0	93	0
echA3	22	MamA	0	91	0	0	0	0	0
echA3	25	MamA	0	91	0	0	0	0	0
atsD	40	MamA	0	92	0	0	0	0	0
atsD	37	MamA	0	92	0	0	0	0	0
no_downstream_cds	86	MamA	0	294	0	0	0	1	0
no_downstream_cds	83	MamA	0	209	0	0	0	93	0
no_downstream_cds	21	MamA	0	93	0	0	0	0	0
Rv0691A	7	MamA	0	86	0	0	0	0	0
no_downstream_cds	0	MamA	0	83	0	0	0	0	0
rpmC	26	HsdM	0	32	0	0	0	32	0
Rv0731c	93	MamA	0	90	0	0	0	90	0
Rv0731c	96	MamA	0	90	0	0	0	0	0
Rv0737	95	MamB	0	91	0	0	0	0	0
Rv0738	89	MamB	0	74	0	0	0	74	0
mmsB	3	MamA	0	85	0	0	0	85	0
mmsB	6	MamA	0	85	0	0	0	0	0
Rv0767c	20	MamB	0	89	0	0	0	89	0
purB	12	HsdM	90	90	0	0	0	90	0
purB	5	HsdM	0	0	0	0	0	90	0
Rv0784	3	MamA	0	87	0	0	0	0	0
Rv0787A	93	HsdM	87	0	0	0	0	0	0
Rv0787A	86	HsdM	0	87	0	0	0	87	0
Rv0799c	4	MamA	0	91	0	0	0	91	0
Rv0799c	7	MamA	0	91	0	0	0	0	0
Rv0799c	58	MamA	0	91	0	0	0	0	0
Rv0799c	61	MamA	0	91	0	0	0	0	0
cpsY	73	MamA	0	86	0	0	0	0	0
cpsY	76	MamA	0	86	0	0	0	86	0
mshD	56	MamA	0	92	0	0	0	0	0
mshD	53	MamA	0	92	0	0	0	0	0
Rv0826	13	HsdM	87	0	0	0	0	0	0
Rv0826	6	HsdM	0	0	0	0	0	87	0
Rv0823c	97	MamA	0	81	0	0	0	81	0
PE_PGRS12	35	MamA	0	90	0	0	0	90	0
PE_PGRS12	32	MamA	0	90	0	0	0	0	0
Rv0842	4	MamA	0	85	0	0	0	0	0
Rv0842	1	MamA	0	85	0	0	0	0	0
Rv0850	64	MamB	0	92	0	0	0	0	0
Rv0863	12	HsdM	78	0	0	0	0	78	0
ercc3	64	MamB	0	61	0	0	0	0	0
cspB	78	MamA	0	79	0	0	0	79	0
cspB	75	MamA	0	79	0	0	0	0	0
PE_PGRS15	35	MamA	0	86	0	0	0	86	0
PE_PGRS15	38	MamA	0	86	0	0	0	0	0
Rv0876c	56	MamA	0	91	0	0	0	0	0
Rv0876c	59	MamA	0	92	0	0	0	0	0
citA	18	MamA	0	93	0	0	0	0	0
citA	21	MamA	0	93	0	0	0	0	0
Rv0892	89	MamA	0	93	0	0	0	0	0
Rv0892	86	MamA	0	93	0	0	0	93	0
Rv0893c	19	MamA	0	93	0	0	0	93	0
Rv0893c	22	MamA	0	93	0	0	0	0	0
Rv0898c	4	MamA	0	69	0	0	0	0	0
Rv0898c	7	MamA	0	69	0	0	0	0	0
Rv0919	27	HsdM	93	0	0	0	0	93	0
Rv0919	20	HsdM	0	93	0	0	0	0	0
pknD	88	MamA	0	93	0	0	0	0	0
pknD	91	MamA	0	93	0	0	0	0	0
Rv0942	40	MamA	0	93	0	0	0	0	0
Rv0942	37	MamA	0	93	0	0	0	93	0
Rv0942	28	MamA	0	93	0	0	0	0	0
Rv0942	25	MamA	0	93	0	0	0	0	0
sucC	99	MamA	0	87	0	0	0	0	0
Rv0976c	33	MamA	0	90	0	0	0	0	0
Rv0976c	36	MamA	0	90	0	0	0	90	0
mprB	58	MamA	0	93	0	0	0	0	0
mprB	55	MamA	0	93	0	0	0	0	0
pepD	41	MamA	0	93	0	0	0	0	0
pepD	38	MamA	0	93	0	0	0	0	0
mscL	69	MamB	0	93	0	0	0	93	0
galU	95	MamB	0	90	0	0	0	0	0
galU	65	MamB	0	93	0	0	0	93	0
Rv1004c	45	MamB	0	82	0	0	0	0	0
mfd	87	MamA	0	93	0	0	0	0	0
mfd	84	MamA	0	93	0	0	0	93	0
no_downstream_cds	84	MamA	0	99	0	0	0	93	0
no_downstream_cds	81	MamA	0	94	0	0	0	1	0
Rv1036c	29	MamA	0	92	0	0	0	92	0
Rv1036c	32	MamA	0	92	0	0	0	0	0
Rv1049	7	MamA	0	91	0	0	0	0	0
Rv1049	4	MamA	0	91	0	0	0	91	0
Rv1053c	48	MamA	0	93	0	0	0	0	0
Rv1053c	51	MamA	0	93	0	0	0	93	0
PE_PGRS20	20	MamA	0	74	0	0	0	74	0
PE_PGRS20	23	MamA	0	74	0	0	0	0	0
PE_PGRS21	19	HsdM	0	0	0	0	0	80	0
PE_PGRS21	12	HsdM	80	0	0	0	0	80	0
Rv1085c	43	MamB	0	55	0	0	0	0	0
Rv1089A	14	MamB	0	57	0	0	0	0	0
glpX	35	MamA	0	85	0	0	0	0	0
glpX	38	MamA	0	85	0	0	0	0	0
glpX	5	HsdM	0	84	0	0	0	84	0
glpX	10	HsdM	90	0	0	90	0	90	0
Rv1120c	51	MamA	0	93	0	0	0	0	0
Rv1120c	54	MamA	0	93	0	0	0	93	0
Rv1149	94	MamB	0	91	0	0	0	0	0
Rv1149	20	HsdM	0	85	0	0	0	85	0
Rv1149	13	HsdM	85	0	0	0	0	0	0
Rv1149	92	MamB	0	47	0	0	0	47	0
narH	99	MamA	0	89	0	0	0	0	0
narH	96	MamA	0	92	0	0	0	92	0
Rv1167c	67	MamA	0	93	0	0	0	0	0
Rv1167c	70	MamA	0	90	0	0	0	0	0
PE12	12	HsdM	93	0	0	0	0	93	0
PE12	19	HsdM	0	0	0	0	0	93	0
pks3	58	MamB	0	93	0	0	0	0	0
Rv1188	96	HsdM	0	0	0	93	0	0	0
Rv1188	89	HsdM	0	0	0	0	0	93	0
Rv1200	32	MamA	0	93	0	0	0	0	0
Rv1200	29	MamA	0	93	0	0	0	93	0
Rv1200	91	MamA	0	85	0	0	0	0	0
Rv1200	88	MamA	0	87	0	0	0	0	0
Rv1199c	44	HsdM	0	92	0	0	0	92	0
Rv1199c	51	HsdM	92	0	0	0	0	0	0
tagA	84	MamB	0	91	0	0	0	91	0
Rv1211	44	MamA	0	91	0	0	0	0	0
Rv1211	41	MamA	0	91	0	0	0	91	0
sigE	89	MamA	0	92	0	0	0	0	0
sigE	86	MamA	0	92	0	0	0	0	0
Rv1219c	19	HsdM	93	0	0	0	0	0	0
Rv1219c	26	HsdM	0	93	0	0	0	93	0
Rv1230c	4	HsdM	0	0	0	0	0	93	0
Rv1230c	11	HsdM	93	93	0	0	0	0	0
corA	5	MamA	0	93	0	0	0	93	0
corA	8	MamA	93	93	0	0	0	0	0
Rv1250	34	MamA	0	85	0	0	0	85	0
Rv1250	31	MamA	0	85	0	0	0	0	0
Rv1251c	13	HsdM	85	0	0	0	0	0	0
Rv1251c	20	HsdM	0	85	0	0	0	85	0
amiB2	41	MamA	0	84	0	0	0	0	0
amiB2	38	MamA	0	84	0	0	0	0	0
amiB2	65	MamB	0	84	0	0	0	0	0
oppB	40	MamA	0	69	0	0	0	0	0
oppB	43	MamA	0	69	0	0	0	69	0
Rv1321	91	MamB	0	83	0	0	0	83	0
glgB	59	MamB	0	85	0	0	0	0	0
lprD	8	HsdM	0	82	0	0	0	82	0
Rv1358	74	MamA	0	80	0	0	0	0	0
Rv1358	71	MamA	0	80	0	0	0	80	0
Rv1358	6	MamA	0	84	0	0	0	0	0
Rv1358	3	MamA	0	84	0	0	0	84	0
no_downstream_cds	27	MamB	0	82	0	0	0	82	0
Rv1370c	25	MamA	0	30	0	0	0	0	0
Rv1370c	22	MamA	0	30	0	0	0	30	0
rpoZ	5	MamB	0	93	0	0	0	0	0
Rv1404	80	MamA	0	93	0	0	0	0	0
Rv1404	77	MamA	0	93	0	0	0	0	0
Rv1424c	97	MamA	0	93	0	0	0	0	0
PE_PGRS28	52	MamA	0	26	0	0	0	26	0
PE_PGRS28	55	MamA	0	26	0	0	0	0	0
Rv1473A	50	MamA	0	27	0	0	0	0	0
Rv1473A	47	MamA	0	27	0	0	0	27	0
Rv1482c	2	MamA	0	92	0	0	0	0	0
Rv1482c	5	MamA	0	92	0	0	0	92	0
mazE4	50	MamA	0	92	0	0	0	0	0
mazE4	47	MamA	0	92	0	0	0	92	0
lipL	23	MamA	0	92	0	0	0	0	0
lipL	20	MamA	0	92	0	0	0	92	0
Rv1498A	90	MamA	0	90	0	0	0	0	0
Rv1498A	93	MamA	0	90	0	0	0	90	0
Rv1498A	75	MamA	0	90	0	0	0	0	0
Rv1498A	78	MamA	0	90	0	0	0	0	0
no_downstream_cds	97	MamA	0	92	0	0	0	89	0
no_downstream_cds	94	MamA	0	182	0	0	0	1	0
no_downstream_cds	38	MamA	0	87	0	0	0	0	0
no_downstream_cds	35	MamA	0	87	0	0	0	87	0
Rv1523	90	HsdM	0	90	0	0	0	0	0
Rv1523	83	HsdM	90	0	0	0	0	90	0
mmpL12	4	HsdM	0	0	0	0	0	91	0
mmpL12	11	HsdM	91	0	0	0	0	91	0
no_downstream_cds	19	HsdM	0	73	0	0	73	0	0
no_downstream_cds	12	HsdM	241	0	0	0	0	239	0
no_downstream_cds	80	MamB	0	185	0	0	0	92	0
adh	19	HsdM	0	87	0	0	0	0	0
adh	12	HsdM	87	0	0	0	0	87	0
Rv1531	48	MamB	0	88	0	0	0	0	0
no_downstream_cds	47	MamA	0	88	0	0	0	0	0
no_downstream_cds	50	MamA	0	89	0	0	0	89	0
no_downstream_cds	64	MamA	0	94	0	0	0	93	0
no_downstream_cds	67	MamA	0	94	0	0	0	0	0
no_downstream_cds	66	MamB	0	73	0	0	0	0	0
treZ	92	MamB	0	90	0	0	0	0	0
bioF1	49	MamB	0	93	0	0	0	93	0
Rv1597	7	MamA	0	77	0	0	0	0	0
Rv1597	4	MamA	0	77	0	0	0	77	0
Rv1615	26	MamB	0	79	0	0	0	0	0
cydC	50	MamA	0	79	0	0	0	79	0
cydC	53	MamA	0	79	0	0	0	0	0
Rv1624c	65	MamA	0	79	0	0	0	79	0
Rv1624c	68	MamA	0	79	0	0	0	0	0
TB15.3	17	HsdM	0	0	0	0	62	62	0
TB15.3	10	HsdM	0	0	0	0	0	62	0
Rv1639c	35	MamA	0	74	0	0	0	74	0
infC	15	MamA	0	78	0	0	0	0	0
no_downstream_cds	84	MamB	0	91	0	0	0	0	0
Rv1678	57	MamB	0	86	0	0	0	86	0
Rv1692	95	MamA	0	93	0	0	0	0	0
Rv1692	92	MamA	0	93	0	0	0	0	0
engA	80	MamB	0	92	0	0	0	0	0
Rv1725c	28	MamB	0	88	0	0	0	0	0
Rv1725c	86	MamA	0	88	0	0	0	0	0
Rv1725c	89	MamA	0	88	0	0	0	0	0
Rv1732c	71	MamB	0	67	0	0	0	0	0
Rv1813c	4	HsdM	0	0	0	0	0	93	0
Rv1813c	11	HsdM	93	0	0	0	0	93	0
Rv1813c	68	MamA	0	92	0	0	0	1	0
Rv1813c	71	MamA	0	92	0	0	0	0	0
Rv1817	7	MamA	0	92	0	0	0	0	0
Rv1817	4	MamA	0	92	0	0	0	92	0
Rv1813c	94	MamA	0	87	0	0	0	0	0
Rv1813c	97	MamA	0	87	0	0	0	0	0
PE_PGRS33	12	HsdM	90	0	0	0	0	0	0
PE_PGRS33	19	HsdM	0	0	0	0	90	90	0
ilvG	37	MamA	0	91	0	0	0	0	0
ilvG	34	MamA	0	91	0	0	0	0	0
garA	82	MamA	0	91	0	0	0	0	0
garA	79	MamA	0	91	0	0	0	91	0
Rv1871c	55	MamB	0	93	0	0	0	0	0
Rv1871c	83	MamA	0	89	0	0	0	0	0
Rv1871c	86	MamA	0	89	0	0	0	0	0
no_downstream_cds	74	MamA	0	88	0	0	0	0	0
no_downstream_cds	77	MamA	0	160	0	0	0	0	0
no_downstream_cds	42	MamB	0	76	0	0	0	0	0
mpt63	37	MamA	0	92	0	0	0	0	0
mpt63	40	MamA	0	92	0	0	0	0	0
ephB	33	MamA	0	92	0	0	0	0	0
ephB	30	MamA	0	92	0	0	0	0	0
Rv1944c	13	HsdM	86	0	0	0	0	0	0
Rv1944c	20	HsdM	0	86	0	0	0	86	0
higA	51	MamA	0	90	0	0	0	0	0
higA	48	MamA	0	90	0	0	0	0	0
mpt64	68	MamA	0	86	0	0	0	86	0
mpt64	71	MamA	0	86	0	0	0	0	0
Rv1986	17	MamA	0	91	0	0	0	0	0
Rv1986	14	MamA	0	91	0	0	0	91	0
cfp21	85	MamB	0	88	0	0	0	88	0
Rv2005c	79	HsdM	0	0	0	92	0	92	0
Rv2005c	86	HsdM	0	92	0	0	0	92	0
no_downstream_cds	91	MamA	0	146	0	0	0	53	0
no_downstream_cds	88	MamA	0	53	0	0	0	0	0
Rv2026c	94	MamB	0	86	0	0	0	0	0
Rv2044c	20	MamA	0	93	0	0	0	93	0
Rv2044c	23	MamA	0	93	0	0	0	0	0
lipT	4	HsdM	0	0	0	0	93	93	0
lipT	11	HsdM	93	93	0	93	0	0	0
Rv2050	51	MamA	0	93	0	0	0	0	0
Rv2050	48	MamA	0	93	0	0	0	0	0
Rv2078	92	MamA	0	88	0	0	0	0	0
Rv2078	89	MamA	88	88	0	0	0	0	0
Rv2077A	28	MamB	0	87	0	0	0	87	0
Rv2091c	89	MamA	0	65	0	0	0	65	0
Rv2091c	92	MamA	0	65	0	0	0	0	0
tatA	59	MamA	0	46	0	0	0	46	0
tatA	62	MamA	0	46	0	0	0	0	0
tatA	72	MamA	0	44	0	0	0	44	0
tatA	75	MamA	0	44	0	0	0	0	0
pafA	12	HsdM	88	0	0	0	0	0	0
pafA	19	HsdM	0	0	0	0	0	88	0
mshC	28	MamA	0	93	0	0	0	93	0
mshC	31	MamA	0	93	0	0	0	0	0
Rv2136c	17	MamA	0	88	0	0	0	0	0
lppL	15	MamA	0	88	0	0	0	88	0
Rv2144c	85	MamA	0	68	0	0	0	68	0
Rv2144c	88	MamA	0	68	0	0	0	0	0
Rv2161c	93	MamA	0	89	0	0	0	88	0
Rv2161c	96	MamA	0	88	0	0	0	0	0
Rv2184c	56	HsdM	0	0	0	0	0	85	0
Rv2184c	63	HsdM	0	0	0	0	0	85	0
lipB	87	MamA	0	93	0	0	0	0	0
lipB	84	MamA	0	93	0	0	0	93	0
vapB16	95	MamA	0	89	0	0	0	89	0
vapB16	98	MamA	0	89	0	0	0	0	0
aceE	62	MamA	0	93	0	0	0	0	0
aceE	59	MamA	0	93	0	0	0	0	0
Rv2280	7	MamA	0	63	0	0	0	0	0
Rv2280	14	MamA	0	31	0	0	0	31	0
Rv2285	1	MamB	0	66	0	0	0	0	0
lppP	59	MamA	0	69	0	0	0	69	0
lppP	62	MamA	0	69	0	0	0	0	0
Rv2348c	13	HsdM	73	0	0	0	0	73	0
glyS	16	MamA	0	84	0	0	0	84	0
glyS	19	MamA	0	84	0	0	0	0	0
Rv2360c	39	MamA	0	89	0	0	0	0	0
Rv2360c	42	MamA	0	89	0	0	0	89	0
recO	88	MamA	0	88	0	0	0	0	0
recO	91	MamA	0	88	0	0	0	0	0
Rv2365c	69	MamA	0	89	0	0	0	89	0
Rv2365c	72	MamA	0	89	0	0	0	0	0
dnaJ2	19	MamB	0	90	0	0	0	90	0
dnaJ2	82	MamB	0	90	0	0	0	0	0
cfp2	84	MamB	0	90	0	0	0	0	0
no_downstream_cds	58	MamA	0	101	0	0	0	93	0
no_downstream_cds	55	MamA	0	96	0	0	0	3	0
no_downstream_cds	93	MamA	0	93	0	0	0	0	0
no_downstream_cds	90	MamA	0	93	0	0	0	0	0
mbtJ	24	MamA	0	93	0	0	0	0	0
mbtJ	21	MamA	0	93	0	0	0	93	0
hemN	88	MamA	0	75	0	0	0	0	0
hemN	91	MamA	0	75	0	0	0	0	0
Rv2401	24	MamA	0	84	0	0	0	0	0
Rv2401	21	MamA	0	84	0	0	0	0	0
Rv2405	88	MamA	0	92	0	0	0	0	0
Rv2405	85	MamA	0	92	0	0	0	0	0
nadD	16	MamA	0	93	0	0	0	0	0
nadD	19	MamA	0	93	0	0	0	93	0
no_downstream_cds	59	MamB	0	94	0	0	0	1	0
rplU	3	MamA	0	93	0	0	0	93	0
rplU	6	MamA	0	93	0	0	0	0	0
rplU	83	MamB	0	93	0	0	0	93	0
Rv2456c	17	MamA	0	92	0	0	0	92	0
Rv2456c	20	MamA	0	92	0	0	0	0	0
Rv2479c	62	MamA	0	47	0	0	0	47	0
Rv2479c	59	MamA	0	47	0	0	0	0	0
Rv2499c	97	MamA	0	67	0	0	0	67	0
scoA	49	HsdM	0	67	0	0	0	67	0
ldtB	38	HsdM	0	62	0	0	0	0	0
ldtB	45	HsdM	0	0	0	0	0	62	0
bcp	88	HsdM	66	0	0	0	0	0	0
bcp	81	HsdM	0	66	0	0	0	66	0
bcp	49	MamA	0	66	0	0	0	66	0
bcp	46	MamA	0	66	0	0	0	0	0
Rv2556c	3	MamA	0	91	0	0	0	0	0
Rv2556c	6	MamA	0	91	0	0	0	91	0
Rv2556c	36	MamA	0	91	0	0	0	0	0
Rv2556c	39	MamA	0	91	0	0	0	0	0
Rv2565	35	MamB	0	91	0	0	0	0	0
Rv2573	99	MamA	0	88	0	0	0	0	0
aspS	44	MamB	88	88	0	0	0	0	0
yajC	1	MamB	0	88	0	0	0	88	0
hrp1	19	MamA	0	90	0	0	0	0	0
hrp1	22	MamA	0	90	0	0	0	0	0
Rv2628	4	MamA	0	85	0	0	0	85	0
Rv2628	1	MamA	0	85	0	0	0	0	0
Rv2631	20	HsdM	0	90	0	0	0	90	0
Rv2631	13	HsdM	90	0	0	0	0	90	0
Rv2638	25	MamA	0	91	0	0	0	91	0
Rv2638	22	MamA	0	91	0	0	0	0	0
Rv2642	86	MamA	0	90	0	0	0	90	0
Rv2642	83	MamA	0	90	0	0	0	0	0
Rv2642	33	MamA	0	90	0	0	0	0	0
Rv2642	30	MamA	0	90	0	0	0	90	0
Rv2693c	53	MamA	0	92	0	0	0	92	0
Rv2693c	56	MamA	0	92	0	0	0	0	0
ppgK	54	MamA	0	91	0	0	0	91	0
ppgK	51	MamA	0	91	0	0	0	0	0
Rv2707	82	MamA	0	93	0	0	0	0	0
Rv2707	79	MamA	0	93	0	0	0	93	0
Rv2712c	86	MamB	0	90	0	0	0	90	0
Rv2721c	15	MamA	0	93	0	0	0	93	0
Rv2721c	7	MamA	0	93	0	0	0	0	0
Rv2733c	31	HsdM	93	93	0	0	0	0	0
Rv2733c	59	MamA	0	93	0	0	0	93	0
Rv2733c	62	MamA	0	93	0	0	0	0	0
pgsA3	41	HsdM	0	90	0	0	0	90	0
argA	13	HsdM	93	0	0	0	0	0	0
Rv2762c	91	MamA	0	89	0	0	0	0	0
Rv2762c	94	MamA	0	89	0	0	0	0	0
Rv2775	38	MamA	0	91	0	0	0	0	0
Rv2775	35	MamA	0	91	0	0	0	0	0
Rv2775	67	MamA	0	92	0	0	0	92	0
Rv2775	64	MamA	0	92	0	0	0	0	0
truB	5	HsdM	0	93	0	0	0	0	0
truB	12	HsdM	93	0	0	0	0	0	0
no_downstream_cds	6	MamA	0	66	0	0	0	66	0
no_downstream_cds	3	MamA	0	66	0	0	0	0	0
no_downstream_cds	5	HsdM	0	95	0	0	66	157	0
Rv2825c	5	HsdM	0	93	0	0	0	93	0
Rv2825c	12	HsdM	93	0	0	0	0	93	0
echA16	92	MamA	0	93	0	0	0	0	0
echA16	89	MamA	0	93	0	0	0	0	0
rbfA	63	MamA	0	93	0	0	0	93	0
rbfA	66	MamA	0	93	0	0	0	0	0
infB	52	MamA	0	93	0	0	0	93	0
infB	55	MamA	0	93	0	0	0	0	0
vapB23	71	MamB	0	85	0	0	0	0	0
dxr	75	MamA	0	92	0	0	0	0	0
dxr	78	MamA	0	92	0	0	0	0	0
fdhD	81	HsdM	0	0	0	89	0	89	0
fdhD	88	HsdM	0	0	0	0	0	89	0
dacB2	51	MamA	0	84	0	0	0	1	0
dacB2	48	MamA	0	84	0	0	0	0	0
no_downstream_cds	66	MamA	0	104	0	0	0	11	0
no_downstream_cds	69	MamA	0	106	0	0	0	0	0
drrA	18	MamA	0	93	0	0	0	0	0
drrA	15	MamA	0	93	0	0	0	0	0
drrB	68	MamB	0	93	0	0	0	93	0
no_downstream_cds	79	MamB	0	96	0	0	0	96	0
no_downstream_cds	65	MamB	0	94	0	0	0	0	0
no_downstream_cds	83	MamB	0	93	0	0	0	0	0
Rv2943	55	HsdM	0	87	0	0	0	87	0
pks15	89	MamA	0	93	0	0	0	0	0
pks15	92	MamA	0	93	0	0	0	0	0
pks15	46	MamA	93	93	0	0	0	93	0
pks15	49	MamA	0	93	0	0	0	0	0
Rv2953	90	MamB	0	77	0	0	0	0	0
Rv2969c	5	HsdM	0	89	0	0	0	89	0
Rv2991	89	MamA	0	78	0	0	0	0	0
Rv2991	86	MamA	0	78	0	0	0	0	0
Rv2997	87	MamA	0	78	0	0	0	0	0
Rv2997	84	MamA	0	78	0	0	0	0	0
no_downstream_cds	89	MamA	0	95	0	0	0	94	0
Rv3047c	27	MamA	0	92	0	0	0	92	0
Rv3047c	30	MamA	0	92	0	0	0	0	0
Rv3058c	39	MamA	0	86	0	0	0	0	0
Rv3058c	42	MamA	0	86	0	0	0	0	0
pgmA	73	MamB	0	92	0	0	0	0	0
Rv3083	7	MamA	0	87	0	0	0	0	0
virS	66	MamA	0	81	0	0	0	0	0
Rv3104c	82	MamA	0	87	0	0	0	0	0
Rv3104c	85	MamA	0	87	0	0	0	87	0
PPE49	88	HsdM	0	81	0	0	0	81	0
Rv3127	13	HsdM	84	0	0	0	0	0	0
PPE50	82	MamB	0	43	0	0	0	0	0
PPE50	49	MamA	0	43	0	0	0	0	0
PPE50	46	MamA	0	43	0	0	0	0	0
PPE50	68	MamA	0	43	0	0	0	0	0
PPE50	65	MamA	0	43	0	0	0	43	0
tgs1	28	MamA	0	81	0	0	0	81	0
tgs1	31	MamA	0	81	0	0	0	0	0
Rv3142c	57	MamA	0	92	0	0	0	92	0
Rv3142c	60	MamA	0	92	0	0	0	0	0
Rv3192	90	MamA	0	78	0	0	0	0	0
Rv3192	87	MamA	0	78	0	0	0	0	0
whiB7	5	MamA	0	93	0	0	0	0	0
whiB7	8	MamA	93	93	0	0	0	0	0
Rv3202c	40	MamA	0	93	0	0	0	0	0
Rv3202c	43	MamA	0	90	0	0	0	0	0
Rv3208	41	MamA	0	87	0	0	0	0	0
Rv3208	38	MamA	0	87	0	0	0	0	0
rhlE	99	MamA	0	90	0	0	0	90	0
rhlE	96	MamA	0	93	0	0	0	0	0
sigH	84	MamA	0	91	0	0	0	0	0
sigH	87	MamA	0	91	0	0	0	91	0
desA3	69	MamB	0	90	0	0	0	0	0
Rv3231c	58	MamA	0	87	0	0	0	87	0
Rv3231c	61	MamA	0	87	0	0	0	0	0
tgs3	18	MamB	0	90	0	0	0	90	0
mtrB	94	MamA	0	89	0	0	0	0	0
mtrB	97	MamA	0	89	0	0	0	89	0
sahH	89	MamA	0	89	0	0	0	0	0
sahH	92	MamA	0	89	0	0	0	0	0
rubA	40	MamA	0	89	0	0	0	89	0
rubA	43	MamA	0	89	0	0	0	0	0
rubA	12	MamA	0	89	0	0	0	88	0
rubA	15	MamA	0	88	0	0	0	0	0
whiB2	83	MamB	0	88	0	0	0	0	0
birA	39	MamA	0	43	0	0	0	0	0
birA	42	MamA	0	43	0	0	0	43	0
Rv3284	19	HsdM	0	47	0	0	47	47	0
Rv3284	12	HsdM	47	47	0	0	0	47	0
pcd	73	MamA	0	51	0	0	0	0	0
pcd	70	MamA	0	51	0	0	0	51	0
Rv3312c	13	HsdM	78	78	0	0	0	78	0
Rv3312c	20	HsdM	0	0	0	0	78	0	0
Rv3312A	4	HsdM	0	78	0	0	0	78	0
Rv3312A	11	HsdM	78	0	0	0	0	78	0
trpS	43	MamA	0	93	0	0	0	93	0
trpS	46	MamA	0	93	0	0	0	0	0
icd1	25	MamA	0	87	0	0	0	0	0
icd1	28	MamA	0	87	0	0	0	0	0
no_downstream_cds	49	MamA	0	121	0	0	0	91	0
no_downstream_cds	46	MamA	0	122	0	0	0	11	0
Rv3378c	4	MamA	0	60	0	0	0	0	0
Rv3378c	7	MamA	60	60	0	0	0	60	0
Rv3378c	34	MamB	0	60	0	0	0	60	0
vapB46	47	MamB	0	56	0	0	0	0	0
htdY	43	MamB	0	75	0	0	0	75	0
htdY	51	MamB	0	75	0	0	0	0	0
acrA1	87	MamA	0	76	0	0	0	1	0
acrA1	84	MamA	0	75	0	0	0	75	0
rplM	33	MamB	0	79	0	0	0	0	0
PE31	48	HsdM	0	0	0	0	0	88	0
PE31	41	HsdM	0	0	0	0	0	88	0
bpoA	88	MamA	0	79	0	0	0	0	0
bpoA	91	MamA	0	79	0	0	0	0	0
fdxD	5	MamA	0	91	0	0	0	91	0
fdxD	8	MamA	0	91	0	0	0	0	0
PE_PGRS53	19	HsdM	0	0	0	0	0	92	0
PE_PGRS53	12	HsdM	92	0	0	0	0	0	0
PE_PGRS57	69	MamA	0	77	0	0	0	77	0
PE_PGRS57	66	MamA	0	77	0	0	0	0	0
echA19	7	MamA	89	89	0	0	0	89	0
echA19	4	MamA	0	89	0	0	0	0	0
Rv3528c	98	MamA	0	90	0	0	0	0	0
Rv3549c	56	MamA	0	86	0	0	0	0	0
Rv3549c	59	MamA	0	86	0	0	0	0	0
kstR	72	MamA	0	91	0	0	0	0	0
kstR	69	MamA	0	91	0	0	0	0	0
Rv3583c	5	MamA	0	92	0	0	0	0	0
Rv3583c	8	MamA	92	92	0	0	0	0	0
no_downstream_cds	20	MamB	0	85	0	0	0	1	0
no_downstream_cds	99	MamA	0	84	0	0	0	0	0
PE_PGRS60	3	MamA	0	68	0	0	0	68	0
Rv3683	7	MamB	91	91	0	0	0	0	0
Rv3688c	38	MamA	0	85	0	0	0	0	0
Rv3688c	41	MamA	0	85	0	0	0	85	0
egtC	90	MamA	0	91	0	0	0	91	0
egtC	93	MamA	0	91	0	0	0	0	0
asd	33	MamB	0	85	0	0	0	85	0
Rv3720	99	MamA	0	90	0	0	0	0	0
Rv3720	96	MamA	0	90	0	0	0	0	0
Rv3718c	98	MamA	0	87	0	0	0	0	0
Rv3722c	65	HsdM	0	91	0	0	0	91	0
Rv3728	7	MamA	93	93	0	0	0	0	0
Rv3728	4	MamA	0	93	0	0	0	0	0
no_downstream_cds	33	MamB	0	87	0	0	0	87	0
Rv3735	54	MamA	0	93	0	0	0	0	0
Rv3735	51	MamA	0	93	0	0	0	93	0
Rv3750c	61	MamA	0	93	0	0	0	93	0
Rv3750c	64	MamA	0	93	0	0	0	0	0
lpqH	97	MamA	0	87	0	0	0	0	0
lpqH	94	MamA	0	87	0	0	0	0	0
tcrY	38	MamA	0	93	0	0	0	0	0
tcrY	41	MamA	0	93	0	0	0	0	0
Rv3779	7	MamA	0	93	0	0	0	0	0
Rv3779	4	MamA	0	93	0	0	0	93	0
Rv3780	11	HsdM	93	0	0	0	0	93	0
Rv3788	51	MamB	0	86	0	0	0	0	0
Rv3789	93	MamA	0	92	0	0	0	0	0
Rv3789	90	MamA	0	92	0	0	0	0	0
Rv3787c	86	MamB	0	92	0	0	0	0	0
Rv3796	66	HsdM	0	0	0	0	0	93	0
Rv3796	59	HsdM	0	93	0	0	0	0	0
aftB	84	MamB	0	92	0	0	0	0	0
glf	4	HsdM	0	0	0	0	0	92	0
glf	11	HsdM	92	92	0	0	0	0	0
PE_PGRS62	2	MamA	0	93	0	0	0	0	0
PE_PGRS62	38	MamA	0	87	0	0	0	87	0
glf	27	MamA	0	93	0	0	0	93	0
glf	30	MamA	0	93	0	0	0	0	0
Rv3829c	1	MamA	0	93	0	0	0	0	0
Rv3829c	94	MamA	0	35	0	0	0	35	0
Rv3829c	97	MamA	0	35	0	0	0	0	0
Rv3844	51	MamA	0	76	0	0	0	0	0
Rv3844	48	MamA	0	76	0	0	0	76	0
gltD	74	MamA	0	91	0	0	0	0	0
gltD	77	MamA	0	91	0	0	0	91	0
gltB	39	MamB	0	90	0	0	0	0	0
PE35	48	MamA	0	68	0	0	0	67	0
PE35	45	MamA	0	67	0	0	0	0	0
PE36	4	MamA	0	93	0	0	0	0	0
PE36	7	MamA	93	93	0	0	0	93	0
no_downstream_cds	11	HsdM	74	73	0	0	0	0	0
Rv3898c	67	HsdM	0	0	0	0	0	74	0
sigM	2	MamA	0	78	0	0	0	0	0
no_downstream_cds	80	MamA	0	80	0	0	0	72	0
Rv3916c	53	MamA	0	72	0	0	0	0	0
Rv3916c	56	MamA	0	73	0	0	0	0	0
mkl	1	MamB	0	56	0	0	0	1	0
Rv0794c	24	HsdM	0	0	0	0	0	27	0
Rv0794c	31	HsdM	0	0	0	0	0	27	0
Rv0898c	3	MamA	0	24	0	0	0	0	0
Rv0898c	6	MamA	0	24	0	0	0	0	0
Rv1149	91	MamB	0	40	0	0	0	40	0
Rv1772	54	HsdM	0	0	0	0	0	77	0
Rv1772	47	HsdM	0	0	0	0	0	77	0
Rv1779c	15	MamA	0	87	0	0	0	0	0
Rv1779c	18	MamA	0	87	0	0	0	0	0
no_downstream_cds	4	MamA	0	105	0	0	0	0	0
no_downstream_cds	7	MamA	90	106	0	0	0	15	0
PPE25	33	MamA	0	90	0	0	0	0	0
PPE25	30	MamA	0	90	0	0	0	90	0
PPE25	15	HsdM	90	0	0	0	0	0	0
eccA5	72	MamB	0	90	0	0	0	0	0
no_downstream_cds	8	HsdM	89	89	0	0	0	0	0
no_downstream_cds	15	HsdM	0	0	0	89	0	90	0
glnA3	10	HsdM	0	89	0	0	0	0	0
Rv2144c	86	MamA	0	24	0	0	0	24	0
Rv2144c	89	MamA	0	24	0	0	0	0	0
Rv2172c	89	MamA	0	51	0	0	0	0	0
Rv2172c	92	MamA	0	51	0	0	0	51	0
Rv2172c	33	MamB	0	43	0	0	0	43	0
Rv2280	4	MamA	0	32	0	0	0	32	0
Rv2305	55	MamA	0	79	0	0	0	79	0
Rv2305	52	MamA	0	79	0	0	0	0	0
Rv2305	17	MamA	0	88	0	0	0	0	0
Rv2305	14	MamA	0	88	0	0	0	88	0
Rv2315c	19	MamA	0	88	0	0	0	0	0
Rv2315c	22	MamA	0	88	0	0	0	0	0
Rv2434c	49	MamA	0	24	0	0	0	24	0
Rv2434c	52	MamA	0	24	0	0	0	0	0
rbsK	45	MamB	0	24	0	0	0	0	0
Rv3126c	58	MamB	0	23	0	0	0	23	0
Rv3381c	95	HsdM	0	0	0	0	0	20	0
vapB46	48	MamB	0	27	0	0	0	0	0
Rv3484	12	HsdM	90	0	0	0	0	90	0
espC	51	MamA	0	65	0	0	0	65	0
espC	54	MamA	0	65	0	0	0	0	0
espC	98	MamA	0	65	0	0	0	65	0
ephA	27	MamA	0	63	0	0	0	0	0
espC	28	HsdM	0	0	0	65	0	65	0
espA	29	MamA	0	64	0	0	0	64	0
espA	32	MamA	0	64	0	0	0	0	0
lpqG	100	HsdM	0	0	0	70	0	70	0
lpqG	93	HsdM	0	70	0	0	0	70	0
hpt	74	MamA	0	70	0	0	0	70	69
hpt	77	MamA	0	70	0	0	0	0	0
Rv3627c	63	MamA	0	72	0	0	0	0	0
Rv3627c	66	MamA	0	72	0	0	0	0	0
Rv3636	35	MamA	0	65	0	0	0	0	0
Rv3636	32	MamA	0	65	0	0	0	65	0
Rv3642c	78	HsdM	0	0	0	0	0	75	0
Rv3642c	85	HsdM	0	75	0	0	0	0	0
Rv3657c	93	MamA	0	89	0	0	0	0	0
Rv3657c	96	MamA	0	89	0	0	0	89	0
Rv1473A	93	HsdM	0	0	0	0	0	66	0
moxR1	85	MamA	0	70	0	0	0	0	0
moxR1	82	MamA	0	70	0	0	0	70	0
Rv2015c	72	MamB	0	63	0	0	0	0	0
pitB	7	MamA	0	16	0	0	0	0	0
no_downstream_cds	62	MamA	0	44	0	0	0	38	0
no_downstream_cds	59	MamA	0	39	0	0	0	0	0
no_downstream_cds	13	HsdM	16	0	0	0	0	13	0
no_downstream_cds	6	HsdM	0	2	0	0	15	16	0
Rv3829c	93	MamA	0	58	0	0	0	58	0
Rv3829c	96	MamA	0	58	0	0	0	0	0
tatA	4	MamA	0	22	0	0	0	22	0
tatA	7	MamA	0	22	0	0	0	0	0
atsD	55	MamB	0	19	0	0	0	19	0
vapB37	15	HsdM	0	0	0	0	0	43	0
Rv0296c	21	MamB	0	17	0	0	0	0	0
rplW	33	MamB	0	15	0	0	0	0	0
PE_PGRS19	20	MamA	0	19	0	0	0	19	0
PE_PGRS19	23	MamA	0	19	0	0	0	0	0
rho	88	MamA	0	32	0	0	0	0	0
rho	85	MamA	0	32	0	0	0	32	0
rpmE	59	MamB	0	32	0	0	0	32	0
rpmE	47	MamB	0	32	0	0	0	0	0
Rv1760	29	MamB	0	36	0	0	0	0	0
dop	46	MamA	0	43	0	0	0	43	0
dop	49	MamA	0	43	0	0	0	0	0
no_downstream_cds	31	HsdM	0	0	0	0	0	17	0
no_downstream_cds	24	HsdM	0	0	0	0	0	17	0
Rv2953	89	MamB	0	16	0	0	0	0	0
no_downstream_cds	82	MamB	0	21	0	0	0	0	0
PPE51	68	MamA	0	18	0	0	0	0	0
PPE51	65	MamA	0	18	0	0	0	18	0
no_downstream_cds	10	HsdM	17	17	0	0	0	0	0
Rv3898c	68	HsdM	0	0	0	0	0	17	0
gabD2	90	MamA	0	19	0	0	0	0	0
gabD2	87	MamA	0	19	0	0	0	19	0
Rv2277c	31	HsdM	0	0	0	0	0	18	0
Rv2277c	24	HsdM	0	0	0	0	0	18	0
PPE53	48	MamA	0	17	0	0	0	17	0
PPE53	51	MamA	0	17	0	0	0	0	0
Rv3160c	13	MamA	0	16	0	0	0	0	0
Rv3160c	76	MamA	0	16	0	0	0	0	0
Rv3173c	64	HsdM	16	0	0	0	0	16	0
mesT	93	HsdM	0	0	0	0	0	16	0
mesT	58	HsdM	0	16	0	0	16	0	0
mesT	59	HsdM	0	16	0	0	16	0	0
mesT	12	HsdM	16	0	0	0	0	0	0
Rv0738	90	MamB	0	18	0	0	0	18	0
no_downstream_cds	68	HsdM	0	18	0	0	0	18	0
Rv3180c	47	MamB	0	15	0	0	0	0	0

## Sheet: -10 SFBS distance
MTase	bp upstream of TSS	# TSSs		Legend
HsdM	13	14		bp upstream of TSS	# bases that the methylation motifs are upstream of the TSSs. Strand is not taken into account, since DNA methylation can influence transcriptional activity regardless of strand.
HsdM	12	30		MTase	DNA methyltransferase being referred to
MamA	7	33		# TSSs	The number of distinct TSSs harboring a methylation motif for the specified MTase the specified bp upstream
MamA	8	10
HsdM	9	1
HsdM	97	3
HsdM	93	5
HsdM	27	2
HsdM	10	5
HsdM	51	1
HsdM	19	11
HsdM	11	16
HsdM	83	2
MamA	89	13
HsdM	88	4
MamB	44	2
HsdM	31	4
MamA	46	9
MamB	7	2
HsdM	15	2
HsdM	64	2
MamA	48	12
MamA	45	4
MamB	8	2
MamB	97	1
HsdM	71	2
MamA	4	30
MamA	62	7
MamA	59	11
MamA	91	8
MamA	88	10
MamA	61	5
MamA	58	6
MamB	42	1
MamA	34	4
MamA	37	7
MamA	40	10
MamA	36	7
MamA	33	6
MamA	5	10
MamA	2	4
MamA	83	4
MamA	80	4
MamB	40	1
MamB	49	3
MamB	16	1
MamA	95	5
MamA	92	9
MamA	57	5
MamA	60	2
MamB	83	4
MamA	15	10
MamA	18	4
MamA	52	10
MamA	49	8
MamA	39	6
MamA	43	8
MamA	30	9
MamA	27	9
MamA	0	1
MamA	35	10
MamA	32	7
MamA	71	5
MamA	68	8
MamA	70	4
MamA	73	4
MamA	53	7
MamA	50	5
MamA	55	6
MamA	77	5
MamA	96	10
MamB	0	2
MamA	56	6
MamB	21	2
MamA	78	5
MamA	75	6
MamB	55	4
MamB	64	3
MamB	87	1
MamA	54	7
MamB	96	1
MamB	23	1
MamA	22	7
MamA	25	6
HsdM	26	4
MamA	93	11
MamB	95	2
MamB	89	3
MamA	3	11
MamA	6	6
MamB	20	2
HsdM	86	4
MamA	76	3
MamA	97	10
MamA	1	3
MamA	38	10
MamA	21	4
MamA	86	10
MamA	19	7
HsdM	20	10
MamA	28	6
MamA	99	6
MamA	41	8
MamB	69	3
MamB	65	3
MamB	45	2
MamA	87	9
MamA	84	8
MamA	29	6
MamA	51	13
MamA	20	9
MamA	23	4
MamB	43	3
MamB	14	1
HsdM	5	10
MamB	94	2
MamB	92	3
MamA	67	3
MamB	58	3
HsdM	44	2
MamB	84	4
MamA	44	1
MamA	31	3
MamB	91	4
MamB	59	3
HsdM	8	2
MamA	74	5
MamB	5	1
MamA	47	4
MamA	90	6
HsdM	90	1
MamB	48	2
MamB	26	1
MamA	65	6
MamB	57	2
MamB	80	1
MamB	28	3
MamB	71	2
MamA	94	6
MamA	82	5
MamA	79	4
MamA	17	5
MamA	14	6
MamB	85	2
MamA	72	4
MamA	85	8
MamA	98	5
MamB	1	4
MamA	16	3
MamA	42	5
MamA	69	5
MamB	19	2
MamB	82	2
MamA	24	2
HsdM	49	2
HsdM	38	1
HsdM	81	4
MamB	35	1
MamB	86	3
HsdM	41	3
MamA	64	2
MamA	63	3
MamA	66	4
MamB	68	2
HsdM	55	2
MamB	90	3
MamB	73	1
MamB	18	2
MamA	12	2
HsdM	4	8
MamB	34	2
MamB	47	3
MamB	51	2
MamB	33	6
HsdM	65	2
HsdM	59	3
MamB	39	1
MamB	72	2
HsdM	85	1
MamB	29	1
MamA	13	1
HsdM	58	2
HsdM	96	3
HsdM	79	2
HsdM	28	2
HsdM	100	2
HsdM	18	2
HsdM	17	2
HsdM	16	1
HsdM	6	1
HsdM	89	1
HsdM	56	1
HsdM	63	1
HsdM	45	1
HsdM	48	1
HsdM	66	1
HsdM	67	1
HsdM	24	2
HsdM	54	1
HsdM	47	1
HsdM	95	1
HsdM	78	1
HsdM	68	1

## Sheet: -35 SFBS motif sites filtered
TSS	bp upstream of TSS	MTase	sigA	sigB	sigC	sigD	sigF	sigG	sigH	sigI	sigK		Legend
no_downstream_cds	55	HsdM	0	0	0	0	93	0	0	0	0		TSS	The gene immediately downstream of the TSS.
mtn	58	MamA	0	0	0	93	0	0	0	0	0		bp upstream	# bases that the methylation motif is upstream of the TSS. Strand is not taken into account, since DNA methylation can influence transcriptional activity regardless of strand.
no_downstream_cds	24	MamA	0	0	0	0	93	0	0	0	0		MTase	Which Mtase the methylaiton motif belongs to
no_downstream_cds	15	MamA	0	0	0	0	87	0	0	0	0		sigA-J	Number of isolates with a methylation motif at the specified locus, ovrelapping with the consensus binding motif of the specified sigma factor
no_downstream_cds	18	MamA	0	87	0	0	0	0	0	0	0
iniA	32	MamA	0	90	0	0	0	0	0	0	0
rpmC	26	HsdM	0	0	0	0	0	0	0	0	32
Rv0738	89	MamB	0	74	0	0	0	0	0	0	0
PE_PGRS15	38	MamA	0	0	0	0	86	0	0	0	0
pknD	91	MamA	0	93	0	0	0	0	0	0	0
PE_PGRS21	12	HsdM	0	0	0	0	80	0	0	0	0
glpX	10	HsdM	0	0	0	0	89	0	0	0	0
PE12	12	HsdM	0	0	0	0	93	0	0	0	0
Rv1251c	20	HsdM	0	0	0	0	0	0	0	0	85
Rv1321	91	MamB	0	0	0	0	83	0	0	0	0
lprD	8	HsdM	0	0	0	0	0	0	0	0	82
Rv1358	71	MamA	0	0	0	0	80	0	0	0	0
Rv1358	6	MamA	0	0	0	0	84	0	0	0	0
lipL	23	MamA	0	0	0	0	92	0	0	0	0
Rv1523	83	HsdM	0	0	0	0	90	0	0	0	0
no_downstream_cds	12	HsdM	0	0	0	0	66	0	0	0	0
TB15.3	10	HsdM	0	0	0	0	62	0	0	0	0
Rv1813c	11	HsdM	0	0	0	0	93	0	0	0	0
ilvG	37	MamA	0	0	0	0	91	0	0	0	0
mpt63	40	MamA	0	0	0	0	92	0	0	0	0
higA	51	MamA	0	0	0	0	90	0	0	0	0
Rv2005c	79	HsdM	0	0	0	0	92	0	0	0	0
Rv2005c	86	HsdM	0	0	0	0	0	0	0	92	0
lipT	4	HsdM	0	0	0	0	0	0	0	93	0
lipT	11	HsdM	0	0	0	0	93	0	0	0	0
pafA	12	HsdM	0	0	88	0	0	0	0	0	0
Rv2184c	63	HsdM	0	0	85	0	85	0	85	0	0
aceE	59	MamA	0	93	0	0	0	0	0	0	0
Rv2348c	20	HsdM	0	0	0	0	73	0	0	0	0
nadD	19	MamA	0	0	0	0	93	0	0	0	0
clpX	0	HsdM	0	0	89	0	89	0	0	0	0
Rv2479c	62	MamA	0	0	0	0	47	0	0	0	0
ldtB	45	HsdM	0	0	0	0	62	0	0	0	0
bcp	88	HsdM	0	0	66	0	66	0	0	0	0
bcp	81	HsdM	0	0	0	0	0	0	0	66	0
Rv2631	13	HsdM	0	0	0	0	0	90	0	0	0
Rv2733c	38	HsdM	0	0	93	0	93	0	0	0	0
Rv2733c	59	MamA	0	0	0	0	93	0	0	0	0
argA	13	HsdM	0	0	0	0	93	0	0	0	0
Rv2775	64	MamA	0	0	0	0	92	0	0	0	0
fdhD	81	HsdM	0	0	0	0	89	0	0	0	0
dacB2	51	MamA	0	83	0	0	0	0	0	0	0
no_downstream_cds	69	MamA	0	93	0	0	0	0	0	0	0
drrB	68	MamB	0	0	0	0	93	0	0	0	0
Rv2943	55	HsdM	0	0	87	0	87	0	87	0	0
Rv2969c	5	HsdM	0	0	0	0	0	0	0	0	89
Rv2997	84	MamA	0	78	0	0	0	0	0	0	0
Rv3127	13	HsdM	0	0	0	0	84	0	0	0	0
tgs1	28	MamA	81	0	0	0	0	0	0	0	0
Rv3202c	40	MamA	0	0	0	0	93	0	0	0	0
rubA	12	MamA	0	0	0	0	88	0	0	0	0
Rv3312c	13	HsdM	0	0	0	0	78	0	0	0	0
PE31	41	HsdM	0	0	0	0	88	0	0	0	0
no_downstream_cds	20	MamB	0	0	0	0	84	0	0	0	0
egtC	93	MamA	0	0	0	0	91	0	0	0	0
Rv3779	7	MamA	0	0	0	0	93	0	0	0	0
Rv3796	66	HsdM	0	0	0	0	93	0	0	0	0
Rv3796	59	HsdM	0	0	0	0	0	0	0	0	93
glf	11	HsdM	0	0	0	0	92	0	0	0	0
no_downstream_cds	80	MamA	0	3	0	0	72	0	0	0	0
Rv3916c	53	MamA	0	72	0	0	0	0	0	0	0
PPE25	22	HsdM	0	0	0	0	90	0	0	0	0
PPE25	15	HsdM	0	0	0	0	90	0	0	0	0
no_downstream_cds	8	HsdM	0	0	0	0	0	0	0	0	89
glnA3	10	HsdM	0	0	0	0	89	0	0	0	0
Rv2315c	19	MamA	0	88	0	0	0	0	0	0	0
rbsK	45	MamB	0	0	0	0	24	0	0	0	0
Rv3484	12	HsdM	0	0	0	0	90	0	0	0	0
espC	28	HsdM	0	0	0	0	65	0	0	0	0
espC	35	HsdM	0	0	0	0	65	0	0	0	0
Rv3642c	85	HsdM	0	0	0	0	0	0	0	0	75
Rv1473A	100	HsdM	0	0	0	0	63	0	0	0	0
no_downstream_cds	62	MamA	0	0	0	0	31	0	0	0	0
vapB37	22	HsdM	0	0	0	0	43	0	0	0	0
mesT	12	HsdM	0	0	0	0	16	0	0	0	0
Rv0738	90	MamB	0	18	0	0	0	0	0	0	0
no_downstream_cds	68	HsdM	0	0	0	0	0	0	0	0	18

## Sheet: -35 SFBS distance
MTase	bp upstream of TSS	# TSSs		Legend
MamA	28	1		bp upstream of TSS	# bases that the methylation motifs are upstream of the TSSs. Strand is not taken into account, since DNA methylation can influence transcriptional activity regardless of strand.
MamA	32	1		MTase	DNA methyltransferase being referred to
MamB	89	1		# TSSs	The number of distinct TSSs harboring a methylation motif for the specified MTase the specified bp upstream
MamA	91	1
MamA	59	2
MamA	51	2
MamA	84	1
MamA	53	1
MamA	19	2
MamB	90	1
HsdM	12	5
HsdM	63	3
HsdM	0	2
HsdM	88	2
HsdM	38	2
HsdM	55	3
MamA	58	1
MamA	38	1
HsdM	10	3
MamB	91	1
MamA	71	1
MamA	6	1
MamA	23	1
HsdM	83	1
HsdM	11	3
MamA	37	1
MamA	40	2
HsdM	79	1
HsdM	20	2
MamA	62	1
HsdM	45	1
HsdM	13	4
MamA	64	1
HsdM	81	2
MamB	68	1
MamA	12	1
HsdM	41	1
MamA	93	1
MamA	7	1
HsdM	66	1
HsdM	22	2
HsdM	15	1
MamB	45	1
HsdM	28	1
HsdM	35	1
HsdM	100	1
HsdM	86	1
HsdM	4	1
HsdM	26	1
HsdM	8	1
HsdM	5	1
HsdM	59	1
HsdM	85	1

## Sheet: TSS distance frequency
TSS	bp upstream of TSS	MTase	# isolates		Legend
Rv0004	48	MamA	93		TSS	The gene immediately downstream of the TSS.
Rv0004	45	MamA	93		bp upstream	# bases that the methylation motif is upstream of the TSS. Strand is not taken into account, since DNA methylation can influence transcriptional activity regardless of strand.
gyrB	18	HsdM	91
gyrB	13	HsdM	91
no_downstream_cds	20	MamA	88		MTase	Which Mtase the methylaiton motif belongs to
no_downstream_cds	23	MamA	85		# isolates	The number of MTBC isolates with the specifiied methylation motif/TSS configuatation. (of 93 analyzed)
Rv0007	8	MamB	91
Rv0007	96	HsdM	91
Rv0007	89	HsdM	91
fhaA	97	MamB	91
whiB5	71	HsdM	91
Rv0029	12	HsdM	91
Rv0039c	4	MamA	92
Rv0039c	7	MamA	92
rpsF	62	MamA	92
rpsF	59	MamA	92
Rv0061c	5	HsdM	87
Rv0061c	12	HsdM	87
Rv0068	91	MamA	70
Rv0068	88	MamA	70
no_downstream_cds	55	HsdM	94
no_downstream_cds	62	HsdM	93
mtn	61	MamA	93
mtn	58	MamA	93
no_downstream_cds	34	MamA	93
no_downstream_cds	37	MamA	273
no_downstream_cds	27	MamA	93
no_downstream_cds	24	MamA	186
Rv0102	7	MamA	93
Rv0102	4	MamA	93
no_downstream_cds	15	MamA	90
no_downstream_cds	18	MamA	90
Rv0108c	42	MamB	92
Rv0108c	34	MamA	92
Rv0108c	37	MamA	92
fadD7	40	MamA	87
fadD7	37	MamA	87
cyp138	36	MamA	92
cyp138	33	MamA	92
Rv0138	7	MamA	93
Rv0138	4	MamA	93
Rv0142	8	MamA	91
Rv0142	5	MamA	91
Rv0149	2	MamA	87
pntAa	83	MamA	92
pntAa	80	MamA	92
PE4	5	MamA	89
PE4	8	MamA	89
Rv0176	40	MamB	90
lprO	49	MamB	93
Rv0190	16	MamB	92
Rv0190	95	MamA	91
Rv0190	92	MamA	91
mmpL11	57	MamA	93
mmpL11	60	MamA	93
Rv0209	83	MamB	93
Rv0247c	15	MamA	87
Rv0247c	18	MamA	87
Rv0250c	5	HsdM	93
Rv0250c	12	HsdM	93
Rv0268c	88	MamA	93
Rv0268c	91	MamA	93
vapB25	52	MamA	91
vapB25	49	MamA	91
Rv0281	39	MamA	88
Rv0281	36	MamA	88
no_downstream_cds	40	MamA	265
no_downstream_cds	43	MamA	86
PE_PGRS5	43	MamA	85
PE_PGRS5	40	MamA	85
Rv0306	30	MamA	91
Rv0306	27	MamA	91
Rv0318c	0	MamA	86
Rv0336	48	MamA	82
Rv0336	45	MamA	82
iniA	35	MamA	90
iniA	32	MamA	90
ansP2	43	MamA	86
ansP2	46	MamA	86
Rv0349	71	MamA	93
Rv0349	68	MamA	93
ansP2	70	MamA	91
ansP2	73	MamA	91
Rv0358	53	MamA	86
Rv0358	50	MamA	86
Rv0365c	4	MamA	92
Rv0365c	7	MamA	92
Rv0368c	52	MamA	92
Rv0368c	55	MamA	92
Rv0368c	77	MamA	92
Rv0368c	80	MamA	92
Rv0368c	96	MamA	92
pks6	30	MamA	80
pks6	27	MamA	80
Rv0443	83	MamA	89
Rv0443	80	MamA	89
Rv0446c	0	MamB	92
mmpS4	56	MamA	93
mmpS4	7	MamA	93
mazF1	9	HsdM	93
mazF1	16	HsdM	93
Rv0465c	4	MamA	87
Rv0465c	7	MamA	87
Rv0474	21	MamB	93
mshA	78	MamA	74
mshA	75	MamA	74
Rv0497	55	MamB	88
Rv0495c	97	HsdM	89
hemA	64	MamB	92
fabH	87	MamB	93
fabH	90	HsdM	93
fabH	97	HsdM	93
Rv0565c	36	MamA	93
Rv0565c	39	MamA	93
Rv0572c	54	MamA	91
Rv0572c	57	MamA	91
lpqN	96	MamB	93
Rv0585c	23	MamB	93
no_downstream_cds	96	MamA	93
vapB28	11	HsdM	93
vapB28	12	HsdM	93
echA3	22	MamA	91
echA3	25	MamA	91
atsD	40	MamA	92
atsD	37	MamA	92
no_downstream_cds	86	MamA	294
no_downstream_cds	83	MamA	209
no_downstream_cds	21	MamA	93
Rv0691A	7	MamA	86
no_downstream_cds	0	MamA	83
rpmC	33	HsdM	32
rpmC	26	HsdM	32
Rv0731c	93	MamA	90
Rv0731c	96	MamA	90
Rv0737	95	MamB	91
Rv0738	89	MamB	74
mmsB	3	MamA	85
mmsB	6	MamA	85
Rv0767c	20	MamB	89
purB	12	HsdM	90
purB	5	HsdM	90
Rv0784	3	MamA	87
Rv0787A	93	HsdM	87
Rv0787A	86	HsdM	87
Rv0799c	4	MamA	91
Rv0799c	7	MamA	91
Rv0799c	58	MamA	91
Rv0799c	61	MamA	91
cpsY	73	MamA	86
cpsY	76	MamA	86
mshD	56	MamA	92
mshD	53	MamA	92
mshD	13	HsdM	92
mshD	6	HsdM	92
Rv0826	13	HsdM	87
Rv0826	6	HsdM	87
Rv0823c	97	MamA	81
PE_PGRS12	35	MamA	90
PE_PGRS12	32	MamA	90
lpqR	91	MamB	3
Rv0841	100	HsdM	3
Rv0842	4	MamA	85
Rv0842	1	MamA	85
Rv0850	64	MamB	92
Rv0863	19	HsdM	78
Rv0863	12	HsdM	78
ercc3	64	MamB	61
cspB	78	MamA	79
cspB	75	MamA	79
PE_PGRS15	35	MamA	86
PE_PGRS15	38	MamA	86
Rv0876c	56	MamA	91
Rv0876c	59	MamA	92
citA	18	MamA	93
citA	21	MamA	93
Rv0892	89	MamA	93
Rv0892	86	MamA	93
Rv0893c	19	MamA	93
Rv0893c	22	MamA	93
Rv0898c	4	MamA	69
Rv0898c	7	MamA	69
Rv0919	27	HsdM	93
Rv0919	20	HsdM	93
pknD	88	MamA	93
pknD	91	MamA	93
Rv0942	40	MamA	93
Rv0942	37	MamA	93
Rv0942	28	MamA	93
Rv0942	25	MamA	93
sucC	99	MamA	87
Rv0976c	33	MamA	90
Rv0976c	36	MamA	90
mprB	58	MamA	93
mprB	55	MamA	93
pepD	41	MamA	93
pepD	38	MamA	93
mscL	69	MamB	93
galU	95	MamB	90
galU	65	MamB	93
Rv1004c	45	MamB	82
mfd	87	MamA	93
mfd	84	MamA	93
no_downstream_cds	84	MamA	99
no_downstream_cds	81	MamA	94
Rv1036c	29	MamA	92
Rv1036c	32	MamA	92
Rv1049	7	MamA	91
Rv1049	4	MamA	91
Rv1053c	48	MamA	93
Rv1053c	51	MamA	93
PE_PGRS20	20	MamA	74
PE_PGRS20	23	MamA	74
PE_PGRS21	19	HsdM	80
PE_PGRS21	12	HsdM	80
Rv1085c	43	MamB	55
Rv1089A	14	MamB	57
glpX	35	MamA	85
glpX	38	MamA	85
glpX	5	HsdM	84
glpX	10	HsdM	90
Rv1120c	51	MamA	93
Rv1120c	54	MamA	93
Rv1149	94	MamB	91
Rv1149	20	HsdM	85
Rv1149	13	HsdM	85
Rv1149	92	MamB	47
narH	99	MamA	89
narH	96	MamA	92
Rv1167c	67	MamA	93
Rv1167c	70	MamA	90
PE12	12	HsdM	93
PE12	19	HsdM	93
pks3	58	MamB	93
Rv1188	96	HsdM	93
Rv1188	89	HsdM	93
Rv1200	32	MamA	93
Rv1200	29	MamA	93
Rv1200	91	MamA	85
Rv1200	88	MamA	87
Rv1199c	44	HsdM	92
Rv1199c	51	HsdM	92
tagA	84	MamB	91
Rv1211	44	MamA	91
Rv1211	41	MamA	91
sigE	89	MamA	92
sigE	86	MamA	92
Rv1219c	19	HsdM	93
Rv1219c	26	HsdM	93
Rv1230c	4	HsdM	93
Rv1230c	11	HsdM	93
corA	5	MamA	93
corA	8	MamA	93
Rv1250	34	MamA	85
Rv1250	31	MamA	85
Rv1251c	13	HsdM	85
Rv1251c	20	HsdM	85
amiB2	41	MamA	84
amiB2	38	MamA	84
amiB2	65	MamB	84
oppB	40	MamA	69
oppB	43	MamA	69
Rv1321	91	MamB	83
glgB	59	MamB	85
lprD	38	HsdM	80
lprD	8	HsdM	82
Rv1358	74	MamA	80
Rv1358	71	MamA	80
Rv1358	6	MamA	84
Rv1358	3	MamA	84
no_downstream_cds	27	MamB	82
Rv1370c	25	MamA	30
Rv1370c	22	MamA	30
rpoZ	5	MamB	93
Rv1404	80	MamA	93
Rv1404	77	MamA	93
Rv1424c	97	MamA	93
PE_PGRS28	52	MamA	26
PE_PGRS28	55	MamA	26
Rv1473A	50	MamA	27
Rv1473A	47	MamA	27
Rv1482c	2	MamA	92
Rv1482c	5	MamA	92
mazE4	50	MamA	92
mazE4	47	MamA	92
lipL	23	MamA	92
lipL	20	MamA	92
Rv1498A	90	MamA	90
Rv1498A	93	MamA	90
Rv1498A	75	MamA	90
Rv1498A	78	MamA	90
no_downstream_cds	97	MamA	92
no_downstream_cds	94	MamA	182
no_downstream_cds	38	MamA	87
no_downstream_cds	35	MamA	87
Rv1523	90	HsdM	90
Rv1523	83	HsdM	90
mmpL12	4	HsdM	91
mmpL12	11	HsdM	91
no_downstream_cds	19	HsdM	82
no_downstream_cds	12	HsdM	241
no_downstream_cds	80	MamB	185
adh	19	HsdM	87
adh	12	HsdM	87
Rv1531	48	MamB	88
no_downstream_cds	47	MamA	88
no_downstream_cds	50	MamA	89
no_downstream_cds	64	MamA	94
no_downstream_cds	67	MamA	94
no_downstream_cds	66	MamB	73
treZ	92	MamB	90
bioF1	49	MamB	93
Rv1597	7	MamA	77
Rv1597	4	MamA	77
Rv1615	26	MamB	79
cydC	50	MamA	79
cydC	53	MamA	79
Rv1624c	65	MamA	79
Rv1624c	68	MamA	79
TB15.3	17	HsdM	62
TB15.3	10	HsdM	62
Rv1639c	35	MamA	74
infC	15	MamA	78
no_downstream_cds	84	MamB	91
Rv1678	57	MamB	86
Rv1692	95	MamA	93
Rv1692	92	MamA	93
engA	80	MamB	92
Rv1725c	28	MamB	88
Rv1725c	86	MamA	88
Rv1725c	89	MamA	88
Rv1732c	71	MamB	67
Rv1813c	4	HsdM	93
Rv1813c	11	HsdM	93
Rv1813c	68	MamA	92
Rv1813c	71	MamA	92
Rv1817	7	MamA	92
Rv1817	4	MamA	92
Rv1813c	94	MamA	87
Rv1813c	97	MamA	87
PE_PGRS33	12	HsdM	90
PE_PGRS33	19	HsdM	90
ilvG	37	MamA	91
ilvG	34	MamA	91
garA	82	MamA	91
garA	79	MamA	91
Rv1871c	55	MamB	93
Rv1871c	83	MamA	89
Rv1871c	86	MamA	89
no_downstream_cds	74	MamA	88
no_downstream_cds	77	MamA	160
no_downstream_cds	42	MamB	76
mpt63	37	MamA	92
mpt63	40	MamA	92
ephB	33	MamA	92
ephB	30	MamA	92
Rv1944c	13	HsdM	86
Rv1944c	20	HsdM	86
higA	51	MamA	90
higA	48	MamA	90
mpt64	68	MamA	86
mpt64	71	MamA	86
Rv1986	17	MamA	91
Rv1986	14	MamA	91
cfp21	85	MamB	88
Rv2005c	79	HsdM	92
Rv2005c	86	HsdM	92
no_downstream_cds	91	MamA	146
no_downstream_cds	88	MamA	53
Rv2026c	94	MamB	86
Rv2044c	20	MamA	93
Rv2044c	23	MamA	93
lipT	4	HsdM	93
lipT	11	HsdM	93
Rv2050	51	MamA	93
Rv2050	48	MamA	93
Rv2078	92	MamA	88
Rv2078	89	MamA	88
Rv2077A	28	MamB	87
Rv2091c	89	MamA	65
Rv2091c	92	MamA	65
tatA	59	MamA	46
tatA	62	MamA	46
tatA	72	MamA	44
tatA	75	MamA	44
pafA	12	HsdM	88
pafA	19	HsdM	88
Rv2114	79	MamA	13
Rv2114	76	MamA	12
mshC	28	MamA	93
mshC	31	MamA	93
Rv2136c	17	MamA	88
lppL	15	MamA	88
Rv2144c	85	MamA	68
Rv2144c	88	MamA	68
Rv2161c	93	MamA	89
Rv2161c	96	MamA	88
Rv2184c	56	HsdM	85
Rv2184c	63	HsdM	85
lipB	87	MamA	93
lipB	84	MamA	93
vapB16	95	MamA	89
vapB16	98	MamA	89
aceE	62	MamA	93
aceE	59	MamA	93
Rv2280	7	MamA	63
Rv2280	14	MamA	31
Rv2285	1	MamB	66
lppP	59	MamA	69
lppP	62	MamA	69
Rv2348c	13	HsdM	73
Rv2348c	20	HsdM	73
glyS	16	MamA	84
glyS	19	MamA	84
Rv2360c	39	MamA	89
Rv2360c	42	MamA	89
recO	88	MamA	88
recO	91	MamA	88
Rv2365c	69	MamA	89
Rv2365c	72	MamA	89
dnaJ2	19	MamB	90
dnaJ2	82	MamB	90
cfp2	84	MamB	90
no_downstream_cds	58	MamA	101
no_downstream_cds	55	MamA	96
no_downstream_cds	93	MamA	93
no_downstream_cds	90	MamA	93
mbtJ	24	MamA	93
mbtJ	21	MamA	93
hemN	88	MamA	75
hemN	91	MamA	75
Rv2401	24	MamA	84
Rv2401	21	MamA	84
lppR	69	HsdM	92
lppR	76	HsdM	92
Rv2405	88	MamA	92
Rv2405	85	MamA	92
nadD	16	MamA	93
nadD	19	MamA	93
no_downstream_cds	59	MamB	94
rplU	3	MamA	93
rplU	6	MamA	93
rplU	83	MamB	93
Rv2456c	17	MamA	92
Rv2456c	20	MamA	92
clpX	0	HsdM	89
Rv2479c	62	MamA	47
Rv2479c	59	MamA	47
Rv2499c	97	MamA	67
scoA	49	HsdM	67
scoA	56	HsdM	67
ldtB	38	HsdM	62
ldtB	45	HsdM	62
bcp	88	HsdM	66
bcp	81	HsdM	66
bcp	49	MamA	66
bcp	46	MamA	66
Rv2556c	3	MamA	91
Rv2556c	6	MamA	91
Rv2556c	36	MamA	91
Rv2556c	39	MamA	91
Rv2565	35	MamB	91
Rv2573	99	MamA	88
aspS	44	MamB	88
yajC	1	MamB	88
hrp1	19	MamA	90
hrp1	22	MamA	90
Rv2628	4	MamA	85
Rv2628	1	MamA	85
Rv2631	20	HsdM	90
Rv2631	13	HsdM	90
Rv2638	25	MamA	91
Rv2638	22	MamA	91
Rv2642	86	MamA	90
Rv2642	83	MamA	90
Rv2642	33	MamA	90
Rv2642	30	MamA	90
Rv2693c	53	MamA	92
Rv2693c	56	MamA	92
ppgK	54	MamA	91
ppgK	51	MamA	91
Rv2707	82	MamA	93
Rv2707	79	MamA	93
Rv2712c	86	MamB	90
Rv2721c	15	MamA	93
Rv2721c	7	MamA	93
Rv2733c	31	HsdM	93
Rv2733c	38	HsdM	93
Rv2733c	59	MamA	93
Rv2733c	62	MamA	93
pgsA3	41	HsdM	90
argA	13	HsdM	93
Rv2762c	91	MamA	89
Rv2762c	94	MamA	89
Rv2775	38	MamA	91
Rv2775	35	MamA	91
Rv2775	67	MamA	92
Rv2775	64	MamA	92
truB	5	HsdM	93
truB	12	HsdM	93
cut1	24	HsdM	5
cut1	31	HsdM	5
no_downstream_cds	6	MamA	66
no_downstream_cds	3	MamA	66
no_downstream_cds	5	HsdM	159
Rv2825c	5	HsdM	93
Rv2825c	12	HsdM	93
echA16	92	MamA	93
echA16	89	MamA	93
rbfA	63	MamA	93
rbfA	66	MamA	93
infB	52	MamA	93
infB	55	MamA	93
vapB23	71	MamB	85
dxr	75	MamA	92
dxr	78	MamA	92
fdhD	81	HsdM	89
fdhD	88	HsdM	89
dacB2	51	MamA	84
dacB2	48	MamA	84
no_downstream_cds	66	MamA	104
no_downstream_cds	69	MamA	106
drrA	18	MamA	93
drrA	15	MamA	93
drrB	68	MamB	93
no_downstream_cds	79	MamB	96
no_downstream_cds	65	MamB	94
no_downstream_cds	83	MamB	93
Rv2943	62	HsdM	87
Rv2943	55	HsdM	87
pks15	89	MamA	93
pks15	92	MamA	93
pks15	46	MamA	93
pks15	49	MamA	93
Rv2953	90	MamB	77
Rv2969c	5	HsdM	89
Rv2991	89	MamA	78
Rv2991	86	MamA	78
Rv2997	87	MamA	78
Rv2997	84	MamA	78
PPE47	31	HsdM	3
PPE47	24	HsdM	3
no_downstream_cds	89	MamA	95
Rv3047c	27	MamA	92
Rv3047c	30	MamA	92
Rv3058c	39	MamA	86
Rv3058c	42	MamA	86
pgmA	73	MamB	92
Rv3083	7	MamA	87
virS	66	MamA	81
Rv3104c	82	MamA	87
Rv3104c	85	MamA	87
PPE49	88	HsdM	81
Rv3127	13	HsdM	84
PPE50	82	MamB	43
PPE50	49	MamA	43
PPE50	46	MamA	43
PPE50	68	MamA	43
PPE50	65	MamA	43
tgs1	28	MamA	81
tgs1	31	MamA	81
Rv3142c	57	MamA	92
Rv3142c	60	MamA	92
Rv3190A	46	MamA	10
Rv3190A	43	MamA	9
Rv3192	90	MamA	78
Rv3192	87	MamA	78
whiB7	5	MamA	93
whiB7	8	MamA	93
Rv3202c	40	MamA	93
Rv3202c	43	MamA	90
Rv3208	41	MamA	87
Rv3208	38	MamA	87
rhlE	99	MamA	90
rhlE	96	MamA	93
sigH	84	MamA	91
sigH	87	MamA	91
desA3	69	MamB	90
Rv3231c	58	MamA	87
Rv3231c	61	MamA	87
tgs3	18	MamB	90
mtrB	94	MamA	89
mtrB	97	MamA	89
sahH	89	MamA	89
sahH	92	MamA	89
rubA	40	MamA	89
rubA	43	MamA	89
rubA	12	MamA	89
rubA	15	MamA	88
whiB2	83	MamB	88
birA	39	MamA	43
birA	42	MamA	43
Rv3284	19	HsdM	47
Rv3284	12	HsdM	47
pcd	73	MamA	51
pcd	70	MamA	51
Rv3312c	13	HsdM	78
Rv3312c	20	HsdM	78
Rv3312A	4	HsdM	78
Rv3312A	11	HsdM	78
trpS	43	MamA	93
trpS	46	MamA	93
icd1	25	MamA	87
icd1	28	MamA	87
no_downstream_cds	49	MamA	121
no_downstream_cds	46	MamA	122
Rv3378c	4	MamA	60
Rv3378c	7	MamA	60
Rv3378c	34	MamB	60
dxs2	93	HsdM	10
vapB46	47	MamB	56
htdY	43	MamB	75
htdY	51	MamB	75
acrA1	87	MamA	76
acrA1	84	MamA	75
rplM	33	MamB	79
PE31	48	HsdM	88
PE31	41	HsdM	88
bpoA	88	MamA	79
bpoA	91	MamA	79
Rv3481c	3	HsdM	3
Rv3484	13	HsdM	3
fdxD	5	MamA	91
fdxD	8	MamA	91
PE_PGRS53	19	HsdM	92
PE_PGRS53	12	HsdM	92
PE_PGRS57	69	MamA	77
PE_PGRS57	66	MamA	77
echA19	7	MamA	89
echA19	4	MamA	89
Rv3528c	98	MamA	90
Rv3549c	56	MamA	86
Rv3549c	59	MamA	86
kstR	72	MamA	91
kstR	69	MamA	91
Rv3583c	5	MamA	92
Rv3583c	8	MamA	92
no_downstream_cds	20	MamB	85
no_downstream_cds	99	MamA	84
PE_PGRS60	3	MamA	68
Rv3683	7	MamB	91
Rv3688c	38	MamA	85
Rv3688c	41	MamA	85
egtC	90	MamA	91
egtC	93	MamA	91
asd	33	MamB	85
Rv3720	99	MamA	90
Rv3720	96	MamA	90
Rv3718c	98	MamA	87
Rv3722c	58	HsdM	91
Rv3722c	65	HsdM	91
Rv3728	7	MamA	93
Rv3728	4	MamA	93
no_downstream_cds	33	MamB	87
Rv3735	54	MamA	93
Rv3735	51	MamA	93
Rv3750c	61	MamA	93
Rv3750c	64	MamA	93
lpqH	97	MamA	87
lpqH	94	MamA	87
tcrY	38	MamA	93
tcrY	41	MamA	93
Rv3779	7	MamA	93
Rv3779	4	MamA	93
Rv3780	11	HsdM	93
Rv3778c	44	HsdM	93
Rv3788	51	MamB	86
Rv3789	93	MamA	92
Rv3789	90	MamA	92
Rv3787c	86	MamB	92
Rv3796	66	HsdM	93
Rv3796	59	HsdM	93
aftB	84	MamB	92
glf	4	HsdM	92
glf	11	HsdM	92
PE_PGRS62	2	MamA	93
PE_PGRS62	38	MamA	87
glf	27	MamA	93
glf	30	MamA	93
Rv3829c	1	MamA	93
Rv3829c	94	MamA	35
Rv3829c	97	MamA	35
Rv3844	51	MamA	76
Rv3844	48	MamA	76
gltD	74	MamA	91
gltD	77	MamA	91
gltB	39	MamB	90
PE35	48	MamA	68
PE35	45	MamA	67
PE36	4	MamA	93
PE36	7	MamA	93
no_downstream_cds	11	HsdM	74
Rv3898c	67	HsdM	74
sigM	2	MamA	78
no_downstream_cds	80	MamA	80
Rv3916c	53	MamA	72
Rv3916c	56	MamA	73
Rv0075	100	HsdM	8
mkl	1	MamB	56
mmsB	4	MamA	7
mmsB	7	MamA	7
Rv0794c	24	HsdM	27
Rv0794c	31	HsdM	27
Rv0898c	3	MamA	24
Rv0898c	6	MamA	24
Rv1149	91	MamB	40
Rv1186c	92	MamA	3
Rv1186c	95	MamA	2
Rv1772	54	HsdM	77
Rv1772	47	HsdM	77
Rv1779c	15	MamA	87
Rv1779c	18	MamA	87
no_downstream_cds	4	MamA	105
no_downstream_cds	7	MamA	106
PPE25	33	MamA	90
PPE25	30	MamA	90
PPE25	22	HsdM	90
PPE25	15	HsdM	90
eccA5	72	MamB	90
no_downstream_cds	8	HsdM	89
no_downstream_cds	15	HsdM	90
gnd1	87	HsdM	7
gnd1	94	HsdM	7
glnA3	10	HsdM	89
glnA3	3	HsdM	89
Rv2144c	86	MamA	24
Rv2144c	89	MamA	24
Rv2172c	89	MamA	51
Rv2172c	92	MamA	51
Rv2172c	33	MamB	43
Rv2280	4	MamA	32
Rv2305	55	MamA	79
Rv2305	52	MamA	79
Rv2305	17	MamA	88
Rv2305	14	MamA	88
Rv2315c	19	MamA	88
Rv2315c	22	MamA	88
Rv2401	23	MamA	8
Rv2401	20	MamA	8
Rv2434c	49	MamA	24
Rv2434c	52	MamA	24
rbsK	45	MamB	24
Rv3126c	58	MamB	23
Rv3179	49	HsdM	10
Rv3179	43	HsdM	10
Rv3179	42	HsdM	10
Rv3179	36	HsdM	10
Rv3381c	95	HsdM	20
vapB46	48	MamB	27
Rv3481c	4	HsdM	90
Rv3484	12	HsdM	90
espC	51	MamA	65
espC	54	MamA	65
espC	98	MamA	65
ephA	27	MamA	63
espC	28	HsdM	65
espC	35	HsdM	65
espA	29	MamA	64
espA	32	MamA	64
lpqG	100	HsdM	70
lpqG	93	HsdM	70
hpt	74	MamA	70
hpt	77	MamA	70
Rv3627c	63	MamA	72
Rv3627c	66	MamA	72
Rv3636	35	MamA	65
Rv3636	32	MamA	65
Rv3642c	78	HsdM	75
Rv3642c	85	HsdM	75
Rv3657c	93	MamA	89
Rv3657c	96	MamA	89
dnaN	21	MamA	1
dnaN	18	MamA	1
Rv0036c	82	MamB	3
Rv1085c	34	MamB	5
Rv1473A	100	HsdM	63
Rv1473A	93	HsdM	66
moxR1	85	MamA	70
moxR1	82	MamA	70
fadD25	87	MamA	6
fadD25	84	MamA	6
fadD25	21	MamB	6
gabD2	33	MamA	5
gabD2	30	MamA	5
Rv1755c	31	HsdM	4
Rv1755c	38	HsdM	4
Rv2015c	72	MamB	63
pafC	4	MamA	3
pafC	7	MamA	3
Rv2118c	59	MamA	5
Rv2118c	62	MamA	5
lppL	2	MamA	5
Rv2280	3	MamA	3
Rv2279	83	MamB	3
pitB	7	MamA	16
pitB	14	MamA	12
no_downstream_cds	62	MamA	44
no_downstream_cds	59	MamA	39
no_downstream_cds	2	MamA	1
no_downstream_cds	13	HsdM	16
no_downstream_cds	6	HsdM	18
lpqG	81	HsdM	1
lpqG	74	HsdM	1
hpt	24	MamA	1
hpt	27	MamA	1
Rv3829c	93	MamA	58
Rv3829c	96	MamA	58
Rv1186c	91	MamA	14
Rv1186c	94	MamA	14
Rv1358	11	MamA	4
Rv1358	8	MamA	4
pcd	74	MamA	1
pcd	71	MamA	1
mak	100	HsdM	12
mak	93	HsdM	12
PPE5	5	HsdM	1
PPE5	12	HsdM	1
tatA	4	MamA	22
tatA	7	MamA	22
Rv2277c	0	MamA	4
Rv2277c	84	MamA	5
Rv2277c	87	MamA	5
Rv2277c	83	MamB	9
Rv2817c	69	MamA	1
Rv2817c	72	MamA	1
Rv2818c	65	HsdM	1
Rv2818c	72	HsdM	1
PE_PGRS60	2	MamA	3
no_downstream_cds	51	MamA	3
no_downstream_cds	48	MamA	5
atsD	55	MamB	19
phoP	66	HsdM	5
phoP	59	HsdM	5
phoP	99	MamA	5
vapB37	15	HsdM	43
vapB37	22	HsdM	43
Rv3126c	96	HsdM	6
Rv3126c	48	HsdM	6
no_downstream_cds	17	MamA	3
devS	28	MamA	2
devS	31	MamA	2
Rv3354	49	MamA	1
Rv3354	46	MamA	1
Rv3475	88	MamA	8
Rv3475	91	MamA	8
cyp138	34	MamA	1
cyp138	31	MamA	1
Rv0296c	21	MamB	17
rplW	33	MamB	15
PE_PGRS19	20	MamA	19
PE_PGRS19	23	MamA	19
rho	88	MamA	32
rho	85	MamA	32
rpmE	59	MamB	32
rpmE	47	MamB	32
Rv1760	29	MamB	36
dop	46	MamA	43
dop	49	MamA	43
hemN	34	MamA	14
hemN	37	MamA	14
sirA	2	MamB	13
Rv2775	68	MamA	1
Rv2775	65	MamA	1
no_downstream_cds	31	HsdM	17
no_downstream_cds	24	HsdM	17
no_downstream_cds	78	MamA	2
no_downstream_cds	75	MamA	1
Rv2953	89	MamB	16
no_downstream_cds	82	MamB	21
PPE51	68	MamA	18
PPE51	65	MamA	18
PE35	51	MamA	1
no_downstream_cds	10	HsdM	17
Rv3898c	68	HsdM	17
vapB25	51	MamA	2
vapB25	48	MamA	2
cspB	79	MamA	5
cspB	76	MamA	5
PE_PGRS21	90	MamB	1
gabD2	90	MamA	19
gabD2	87	MamA	19
Rv2456c	98	MamA	1
lipM	36	MamA	2
lipM	33	MamA	2
Rv2813	90	MamA	1
Rv2813	87	MamA	1
Rv2277c	31	HsdM	18
Rv2277c	24	HsdM	18
espC	28	MamA	11
espC	31	MamA	11
Rv2113	8	MamA	4
Rv2113	5	MamA	4
dop	93	MamA	5
dop	96	MamA	4
mpa	36	MamB	3
Rv2184c	55	HsdM	4
Rv2184c	62	HsdM	4
Rv2434c	78	HsdM	4
Rv2434c	85	HsdM	4
Rv2437	58	MamB	4
Rv3192	89	MamA	1
Rv3192	86	MamA	1
ethA	83	MamA	3
ethA	86	MamA	3
no_downstream_cds	70	MamA	2
no_downstream_cds	73	MamA	2
Rv0680c	3	HsdM	3
Rv0680c	10	HsdM	3
PPE12	8	HsdM	2
PPE12	17	HsdM	2
Rv0756c	39	MamA	2
Rv0756c	42	MamA	2
Rv0823c	86	MamA	6
Rv0823c	89	MamA	6
adh	20	HsdM	4
adh	13	HsdM	4
Rv1531	49	MamB	4
Rv1597	9	MamA	2
Rv1597	6	MamA	2
Rv1670	96	HsdM	3
Rv1670	89	HsdM	3
vapB12	91	MamA	1
vapB12	94	MamA	1
Rv1763	43	MamB	1
Rv1887	42	MamB	5
Rv1951c	77	HsdM	1
Rv1951c	84	HsdM	1
parD1	48	HsdM	1
parD1	55	HsdM	1
Rv2799	38	MamB	2
Rv2292c	4	MamB	2
Rv2802c	66	MamA	2
Rv2802c	69	MamA	2
Rv2813	19	MamA	2
Rv2813	16	MamA	2
Rv2280	52	MamA	2
Rv2280	49	MamA	2
rnc	29	MamA	2
rnc	32	MamA	2
Rv2927c	26	MamA	2
Rv2927c	29	MamA	2
Rv3126c	91	HsdM	1
Rv3126c	98	HsdM	1
PPE53	48	MamA	17
PPE53	51	MamA	17
Rv3160c	13	MamA	16
Rv3160c	76	MamA	16
Rv3173c	64	HsdM	16
Rv3173c	71	HsdM	16
mesT	93	HsdM	16
mesT	58	HsdM	16
mesT	59	HsdM	16
mesT	12	HsdM	16
pyrR	51	MamA	1
pyrR	48	MamA	1
Rv1760	28	MamB	1
PE_PGRS32	8	HsdM	1
PE_PGRS32	15	HsdM	1
no_downstream_cds	10	MamA	1
Rv3090	2	MamA	1
Rv3090	83	MamA	1
Rv3327	93	HsdM	1
Rv3327	86	HsdM	1
no_downstream_cds	92	HsdM	1
whiB5	56	MamB	1
Rv1186c	89	MamA	1
clpX	80	MamA	1
clpX	83	MamA	1
Rv2859c	49	MamA	1
Rv2859c	52	MamA	1
Rv0190	96	MamA	2
Rv0190	93	MamA	2
Rv0443	82	MamA	4
Rv0443	79	MamA	4
lipG	91	MamA	5
lipG	94	MamA	5
rplW	87	MamB	5
Rv0738	90	MamB	18
gmdA	59	MamA	1
gmdA	56	MamA	1
Rv1914c	78	MamA	3
Rv1914c	81	MamA	3
tatA	2	MamA	14
tatA	5	MamA	14
tatA	15	MamA	14
tatA	18	MamA	14
hemN	87	MamA	2
hemN	90	MamA	2
no_downstream_cds	65	HsdM	4
no_downstream_cds	58	HsdM	4
atsD	35	MamB	1
Rv3083	8	MamA	1
Rv3083	5	MamA	1
Rv1813c	17	MamA	4
Rv1813c	20	MamA	4
PPE34	54	HsdM	2
PPE34	61	HsdM	2
Rv2808	4	HsdM	1
no_downstream_cds	13	MamA	8
no_downstream_cds	16	MamA	9
thiX	38	MamA	1
thiX	41	MamA	1
mshD	64	MamA	1
mshD	61	MamA	1
coaA	79	MamA	1
coaA	82	MamA	1
Rv2005c	78	HsdM	1
Rv2005c	85	HsdM	1
no_downstream_cds	19	MamA	2
Rv2172c	88	MamA	1
Rv2172c	91	MamA	1
Rv3083	6	MamA	1
virS	67	MamA	1
dop	47	MamA	2
dop	50	MamA	2
rpmC	87	HsdM	5
rpmC	80	HsdM	5
no_downstream_cds	98	HsdM	1
kgtP	45	MamA	3
kgtP	48	MamA	3
gyrA	56	HsdM	6
gyrA	49	HsdM	6
gyrA	41	MamA	6
gyrA	38	MamA	6
Rv0061c	4	HsdM	6
Rv0061c	11	HsdM	6
Rv0102	71	MamA	6
Rv0102	68	MamA	6
fadD7	41	MamA	6
fadD7	38	MamA	6
Rv0138	97	MamA	6
Rv0138	94	MamA	6
Rv0157A	39	HsdM	6
Rv0157A	46	HsdM	6
Rv0247c	21	MamA	6
Rv0247c	24	MamA	6
Rv0349	99	MamA	6
Rv0349	96	MamA	6
no_downstream_cds	42	MamA	7
no_downstream_cds	45	MamA	8
Rv0356c	10	MamA	6
Rv0356c	13	MamA	6
fadE7	48	MamA	5
fadE7	51	MamA	5
pks6	9	MamA	6
pks6	6	MamA	6
ufaA1	42	MamB	6
Rv0458	45	MamA	6
Rv0458	42	MamA	6
Rv0500A	53	MamA	5
Rv0500A	50	MamA	5
no_downstream_cds	47	MamB	6
Rv0691A	3	MamA	6
Rv0691A	4	MamA	9
Rv0699	28	HsdM	6
Rv0699	21	HsdM	6
Rv0731c	0	MamA	1
Rv0731c	3	MamA	1
Rv0737	41	MamB	1
Rv0738	35	MamB	1
Rv0741	43	MamA	6
Rv0741	40	MamA	6
Rv0767c	19	MamB	3
purB	13	HsdM	3
purB	6	HsdM	3
Rv0779c	35	MamA	6
Rv0779c	38	MamA	6
Rv0787A	74	HsdM	6
Rv0787A	67	HsdM	6
lpqS	13	HsdM	5
lpqS	6	HsdM	5
rpfA	23	HsdM	4
rpfA	30	HsdM	4
Rv0944	12	MamA	6
Rv0944	9	MamA	6
fadE12	87	MamA	6
fadE12	90	MamA	6
PE_PGRS17	31	MamB	5
Rv0999	26	HsdM	6
Rv0999	19	HsdM	6
no_downstream_cds	41	HsdM	12
no_downstream_cds	48	HsdM	7
prsA	11	MamA	6
prsA	14	MamA	6
no_downstream_cds	85	MamB	8
Rv1230c	15	MamB	6
deaD	34	MamA	6
deaD	31	MamA	6
Rv1376	29	MamA	6
Rv1376	26	MamA	6
Rv1435c	51	MamB	4
Rv1478	75	MamA	6
Rv1478	72	MamA	6
pks10	53	MamA	6
pks10	50	MamA	6
cmk	70	HsdM	6
cmk	63	HsdM	6
Rv1907c	13	MamA	6
Rv1907c	16	MamA	6
Rv1947	62	MamA	6
Rv1947	59	MamA	6
mazE6	2	MamA	6
mazE6	5	MamA	6
Rv2023c	1	MamB	2
no_downstream_cds	87	MamA	6
PE_PGRS38	32	MamB	3
Rv2179c	93	MamA	3
Rv2179c	96	MamA	3
TB16.3	96	MamA	3
Rv2186c	98	MamA	3
Rv2191	29	MamB	3
Rv2191	84	MamA	3
Rv2191	81	MamA	3
Rv2190c	55	MamA	3
Rv2190c	58	MamA	3
trpD	90	MamA	3
trpD	93	MamA	3
no_downstream_cds	65	MamA	6
yjcE	43	MamA	3
yjcE	40	MamA	3
Rv2307D	36	MamB	6
Rv2326c	84	MamB	6
rpfD	52	MamB	4
Rv2402	8	MamB	6
Rv2434c	34	MamB	6
accD1	42	MamA	4
accD1	45	MamA	4
Rv2508c	44	MamA	4
Rv2508c	47	MamA	4
Rv2567	90	MamA	6
Rv2567	87	MamA	6
Rv2609c	84	MamA	6
Rv2609c	87	MamA	6
pimA	33	MamA	6
pimA	36	MamA	6
hrp1	1	MamA	5
hrp1	23	MamA	6
hrp1	26	MamA	6
Rv2704	6	MamB	6
Rv2707	91	HsdM	6
Rv2707	84	HsdM	6
argA	36	MamA	6
argA	33	MamA	6
PPE44	52	MamA	6
PPE44	55	MamA	6
sirR	63	HsdM	5
sirR	56	HsdM	5
Rv2805	22	MamA	5
Rv2805	19	MamA	5
pitB	51	MamA	1
pitB	48	MamA	1
Rv2815c	50	HsdM	1
Rv2815c	57	HsdM	1
Rv2859c	93	MamA	5
Rv2859c	96	MamA	5
Rv2943	45	HsdM	6
Rv2943	38	HsdM	6
Rv2955c	96	MamA	1
Rv2966c	19	MamA	1
Rv2966c	22	MamA	1
Rv2969c	1	HsdM	1
Rv2969c	6	HsdM	1
Rv2997	20	MamA	5
Rv2997	17	MamA	5
Rv3126c	69	HsdM	1
Rv3126c	76	HsdM	1
Rv3188	62	MamA	1
Rv3188	59	MamA	1
Rv3222c	38	MamA	5
Rv3222c	41	MamA	5
manB	80	MamA	4
manB	83	MamA	4
Rv3312A	4	MamA	1
Rv3312A	7	MamA	1
echA18	46	MamA	6
echA18	43	MamA	6
Rv3528c	97	MamA	1
fadA6	66	MamA	6
fadA6	69	MamA	6
hsaB	1	MamA	6
hsaB	4	MamA	6
asd	15	MamB	6
Rv3785	10	MamB	6
Rv3786c	74	MamB	6
PE_PGRS62	21	MamA	6
papA2	39	MamB	6
gltB	7	MamA	6
gltB	10	MamA	6
no_downstream_cds	79	MamA	6
no_downstream_cds	76	MamA	1
Rv3916c	59	MamA	1
aldA	37	HsdM	3
aldA	30	HsdM	3
Rv1986	18	MamA	1
Rv1986	15	MamA	1
Rv0043c	40	HsdM	7
Rv0043c	47	HsdM	7
PE_PGRS21	18	HsdM	6
PE_PGRS21	11	HsdM	6
desA2	16	MamA	8
desA2	13	MamA	8
Rv1505c	89	HsdM	7
Rv1505c	96	HsdM	7
TB15.3	74	HsdM	10
TB15.3	67	HsdM	10
no_downstream_cds	74	HsdM	6
no_downstream_cds	67	HsdM	6
dosT	70	MamA	7
dosT	73	MamA	7
PE_PGRS36	18	MamA	5
PE_PGRS36	15	MamA	5
no_downstream_cds	75	HsdM	18
no_downstream_cds	68	HsdM	18
Rv2813	53	MamA	7
Rv2813	50	MamA	7
Rv3191c	28	MamA	13
Rv3191c	31	MamA	13
PE35	47	MamA	7
PE35	44	MamA	7
fadD30	77	MamA	3
fadD30	74	MamA	3
fdxD	6	MamA	2
fdxD	9	MamA	2
PE_PGRS53	18	HsdM	1
PE_PGRS53	11	HsdM	1
gltD	75	MamA	2
gltD	78	MamA	2
gltB	40	MamB	3
PE_PGRS36	19	MamA	2
PE_PGRS36	16	MamA	2
Rv1914c	35	MamA	1
Rv1914c	38	MamA	1
Rv1914c	97	MamB	1
udgA	3	MamA	5
ansP2	42	MamA	5
ansP2	45	MamA	5
Rv1435c	52	MamB	1
Rv2182c	89	MamA	5
Rv2182c	92	MamA	5
Rv2285	22	MamA	1
Rv2285	19	MamA	1
Rv2278	50	HsdM	2
Rv2278	57	HsdM	2
Rv2955c	95	MamA	5
Rv2955c	98	MamA	5
Rv2966c	18	MamA	5
Rv2966c	21	MamA	5
gcp	68	MamA	4
gcp	71	MamA	4
no_downstream_cds	82	MamA	5
Rv3231c	59	MamA	3
Rv3231c	56	MamA	3
lipV	4	MamA	3
PPE50	0	MamA	3
PPE50	3	MamA	3
Rv3127	20	HsdM	3
Rv3104c	83	MamA	6
Rv3104c	80	MamA	6
Rv3083	4	MamA	6
Rv3049c	100	MamB	6
Rv1765c	43	MamB	2
Rv2665	55	MamB	3
Rv2665	25	MamA	3
Rv2665	22	MamA	3
esxR	33	MamA	2
esxR	36	MamA	2
esxR	95	MamB	2
glpX	3	HsdM	6
Rv1104	18	MamA	6
Rv1104	21	MamA	6
Rv1089A	15	MamB	3
Rv1006	36	MamB	6
PE_PGRS15	36	MamA	3
PE_PGRS15	33	MamA	3
Rv0823c	99	MamA	3
Rv0823c	96	MamA	3
Rv0794c	30	HsdM	3
Rv0794c	23	HsdM	3
Rv0784	0	MamA	3
Rv0520	78	MamB	10
Rv0519c	70	MamB	10
gabP	78	MamB	10
Rv0696	94	HsdM	1
Rv1081c	60	MamB	4
PE_PGRS21	64	HsdM	4
PE_PGRS21	57	HsdM	4
Rv1360	84	MamA	3
Rv1360	81	MamA	3
Rv1676	11	MamB	4
Rv1756c	27	MamA	1
Rv1756c	24	MamA	1
Rv1772	33	MamB	1
Rv1776c	66	MamA	1
Rv1776c	69	MamA	1
pafC	14	MamB	13
Rv2114	41	MamB	3
fdhD	2	HsdM	4
trmD	22	MamA	4
trmD	25	MamA	4
Rv3916c	52	MamA	2
Rv3916c	55	MamA	2
Rv0142	95	MamA	1
Rv0142	92	MamA	1
Rv0520	79	MamB	4
Rv0519c	69	MamB	4
gabP	79	MamB	4
engA	79	MamB	1
ctpF	100	MamA	6
dop	33	MamA	1
dop	36	MamA	1
mmpL9	62	HsdM	1
mmpL9	55	HsdM	1
mtc28	4	MamA	1
mtc28	7	MamA	1
pks6	29	MamA	2
pks6	26	MamA	2
PE_PGRS21	78	MamB	1
PE26	13	HsdM	4
PE26	20	HsdM	4
Rv2499c	100	MamA	4
Rv2298	46	MamA	1
Rv2298	49	MamA	1
sseB	11	MamB	1
Rv2288	31	MamA	1
Rv2288	34	MamA	1
Rv2288	93	MamB	1
pitB	4	MamA	4
Rv2161c	90	MamA	1
Rv2136c	9	MamA	4
Rv2136c	6	MamA	4
Rv1986	30	MamB	4
mpt64	69	MamA	6
mpt64	66	MamA	4
Rv1871c	14	MamA	4
Rv1871c	11	MamA	4
vapB12	100	MamA	4
infC	18	MamA	4
Rv2635	20	HsdM	1
Rv2635	13	HsdM	1
idsA2	74	HsdM	1
idsA2	81	HsdM	1
Rv2177c	46	MamA	1
Rv2177c	43	MamA	1
Rv2993c	84	MamB	1
Rv0807	31	MamA	1
Rv0807	28	MamA	1
Rv1951c	89	HsdM	1
Rv1951c	96	HsdM	1
Rv2078	91	MamA	2
Rv2078	88	MamA	2
Rv3657c	94	MamA	1
Rv3657c	97	MamA	1
narL	70	MamB	3
Rv0870c	98	MamA	2
metE	37	MamB	2
Rv1144	73	MamB	2
no_downstream_cds	2	MamB	2
Rv1676	68	MamB	1
trpD	47	HsdM	1
trpD	54	HsdM	1
Rv2280	58	MamA	5
Rv2280	55	MamA	5
cut2	55	MamA	2
cut2	52	MamA	2
PPE38	80	MamA	1
PPE38	83	MamA	1
Rv2480c	12	MamA	4
Rv2480c	9	MamA	4
Rv3180c	47	MamB	15
rubA	53	MamA	2
rubA	56	MamA	2
rubA	25	MamA	2
rubA	28	MamA	2
whiB2	96	MamB	2
no_downstream_cds	39	MamA	1
Rv1765A	20	MamB	1
Rv3361c	47	MamB	2
dnaN	9	MamA	1
dnaN	6	MamA	1
Rv0190	17	MamB	1
Rv0299	16	MamB	4
fadE7	57	HsdM	1
fadE7	64	HsdM	1
no_downstream_cds	54	MamA	2
no_downstream_cds	57	MamA	2
no_downstream_cds	95	MamA	3
no_downstream_cds	98	MamA	3
Rv0870c	27	MamB	1
Rv1006	49	MamB	4
mmpL12	24	HsdM	1
mmpL12	31	HsdM	1
PPE38	13	MamA	10
PPE38	16	MamA	10
htdY	94	MamB	1
acrA1	36	MamA	1
acrA1	33	MamA	1
mak	19	HsdM	1
mak	12	HsdM	1
no_downstream_cds	92	MamA	2
no_downstream_cds	76	HsdM	1
no_downstream_cds	69	HsdM	1
acrA1	9	MamA	10
acrA1	6	MamA	10
mak	1	HsdM	1
Rv1678	56	MamB	1
no_downstream_cds	73	MamB	1
lppQ	96	MamA	1
lppQ	93	MamA	1
no_downstream_cds	56	MamA	1
Rv3474	48	HsdM	2
Rv3474	41	HsdM	2
Rv3612c	29	MamA	4
Rv3612c	32	MamA	4
Rv0836c	81	HsdM	3
Rv0836c	74	HsdM	3
no_downstream_cds	70	HsdM	3
no_downstream_cds	63	HsdM	3
sirR	55	HsdM	1
sirR	62	HsdM	1
dfrA	39	MamA	3
dfrA	36	MamA	3
argA	20	HsdM	3
Rv2712c	20	MamB	3
fadD9	1	MamB	1
Rv2573	16	MamB	3
vapB38	36	MamA	3
vapB38	39	MamA	3
gdh	45	MamA	3
gdh	42	MamA	3
yjcE	41	MamA	1
yjcE	44	MamA	1
Rv2285	2	MamB	4
Rv2161c	94	MamA	3
Rv2161c	91	MamA	3
lppK	30	MamA	3
lppK	33	MamA	3
dop	73	MamA	3
dop	70	MamA	3
pafA	18	HsdM	3
pafA	11	HsdM	3
Rv2024c	1	MamB	1
PPE32	17	MamB	3
Rv1502	47	MamA	3
Rv1502	50	MamA	3
Rv1424c	100	MamA	3
mbtN	1	HsdM	1
Rv1200	1	MamA	3
Rv1167c	64	MamA	3
PE_PGRS22	63	MamA	3
PE_PGRS22	66	MamA	3
PE_PGRS15	44	MamA	3
PE_PGRS15	41	MamA	3
cspB	22	MamA	3
cspB	25	MamA	3
rpfA	83	HsdM	1
rpfA	76	HsdM	1
Rv3186	27	MamA	1
Rv3186	24	MamA	1
manB	93	MamA	1
manB	96	MamA	1
no_downstream_cds	34	HsdM	4
whiB5	72	HsdM	2
Rv0029	11	HsdM	2
Rv0108c	35	MamA	1
Rv0108c	38	MamA	1
fadD30	31	HsdM	3
fadD30	24	HsdM	3
Rv0796	4	MamA	2
Rv0796	7	MamA	2
Rv0796	58	MamA	2
Rv0796	61	MamA	2
Rv1767	90	MamA	1
Rv1767	87	MamA	1
Rv3190A	47	MamA	6
Rv3190A	44	MamA	6
PE_PGRS60	4	MamA	3
PE_PGRS60	1	MamA	3
nth	90	MamA	3
nth	93	MamA	3
PE_PGRS14	66	HsdM	2
PE_PGRS14	73	HsdM	2
no_downstream_cds	14	HsdM	2
no_downstream_cds	21	HsdM	2
Rv2280	5	MamA	2
Rv2280	8	MamA	2
Rv2280	56	MamA	2
Rv2280	59	MamA	2
no_downstream_cds	1	MamB	2
Rv1498A	47	MamA	2
Rv1498A	44	MamA	2
lprD	1	HsdM	2
ppgK	52	MamA	2
ppgK	55	MamA	1
higA	49	MamA	1
higA	52	MamA	1
Rv1944c	19	HsdM	1
Rv1944c	12	HsdM	1
ephB	31	MamA	1
ephB	34	MamA	1
mpt63	39	MamA	1
mpt63	36	MamA	1
Rv0876c	60	MamA	1
Rv0876c	57	MamA	1
Rv0336	47	MamA	4
Rv0336	44	MamA	4
Rv0648	15	MamA	4
Rv0648	12	MamA	4
Rv0826	12	HsdM	1
Rv0826	5	HsdM	1
Rv1928c	56	HsdM	3
Rv1928c	63	HsdM	3
Rv2843	8	MamB	3
Rv2844	70	MamA	3
Rv2844	67	MamA	3
no_downstream_cds	0	MamB	2
Rv0870c	45	MamA	3
Rv0870c	48	MamA	3
rpmF	22	MamB	1
Rv1760	14	MamA	1
Rv1760	11	MamA	1
Rv1774	14	MamA	1
Rv1774	11	MamA	1
Rv2114	82	MamA	1
dop	90	MamA	1
PPE38	73	MamA	1
PPE38	76	MamA	1
glyS	69	MamB	1
vapB23	15	MamA	1
vapB23	12	MamA	1
agpS	23	MamB	1
moaA1	21	MamA	1
agpS	1	MamA	1
Rv3188	21	MamA	1
Rv3188	18	MamA	1
PE_PGRS57	87	MamA	1
PE_PGRS57	84	MamA	1
pks6	31	MamA	1
pks6	28	MamA	1
Rv0519c	22	MamA	2
Rv0519c	25	MamA	2
PPE39	19	HsdM	1
PPE39	26	HsdM	1
PPE39	45	MamB	1
Rv3386	62	MamA	1
Rv3386	59	MamA	1
no_downstream_cds	94	MamB	1
Rv1085c	31	MamB	1
Rv1507A	31	HsdM	1
Rv1507A	24	HsdM	1
no_downstream_cds	72	MamA	2
Rv3510c	82	MamB	1
Rv0472c	4	MamA	1
Rv0472c	7	MamA	1
Rv1057	65	MamA	1
Rv1057	62	MamA	1
Rv1060	12	HsdM	1
Rv1060	19	HsdM	1
glpX	8	HsdM	1
glpX	13	HsdM	1
Rv1764	24	HsdM	1
Rv1764	31	HsdM	1
no_downstream_cds	43	MamB	2
cobL	71	MamB	3
gdh	80	MamA	1
gdh	83	MamA	1
Rv2803	7	MamA	1
Rv2803	4	MamA	1
rplM	34	MamB	1
Rv0393	56	MamB	1
ligB	26	MamA	2
ligB	23	MamA	2
Rv3712	55	MamA	1
Rv3712	52	MamA	1
rpmE	66	MamA	1
rpmE	63	MamA	1
mpt64	72	MamA	2
no_downstream_cds	96	HsdM	1
no_downstream_cds	37	HsdM	1
PE4	4	MamA	4
PE4	7	MamA	4
glpX	36	MamA	2
glpX	39	MamA	2
glpX	6	HsdM	2
glpX	11	HsdM	2
Rv1508c	12	MamA	2
Rv1508c	9	MamA	2
Rv1524	90	HsdM	1
Rv1524	83	HsdM	1
Rv2183c	0	MamA	1
Rv2183c	3	MamA	1
Rv2283	46	MamB	2
Rv2305	54	MamA	1
Rv2305	51	MamA	1
htdY	40	MamB	1
htdY	48	MamB	1
acrA1	90	MamA	1
PE_PGRS58	72	MamB	2
lysA	42	MamB	1
Rv3789	27	MamA	1
Rv3789	24	MamA	1
atsD	41	MamA	1
atsD	38	MamA	1
Rv1524	80	MamB	1
fadD24	91	MamB	1
Rv3190A	49	MamA	1
Rv0725c	3	MamA	1
Rv0725c	6	MamA	1
Rv0731c	54	MamA	1
Rv0731c	57	MamA	1
Rv0850	62	MamB	1
Rv1672c	39	MamB	1
Rv1772	9	MamA	1
Rv1772	6	MamA	1
Rv1773c	62	MamB	1
pitB	8	MamA	1
pitB	15	MamA	1
vapB38	90	MamA	1
vapB38	87	MamA	1
Rv2775	100	MamA	1
Rv2775	97	MamA	1
Rv2808	69	MamA	1
Rv2808	66	MamA	1
Rv2808	7	MamB	1
Rv3160c	12	MamA	1
Rv3160c	75	MamA	1
Rv3182	100	MamA	1
moaC3	90	MamA	1
moaC3	93	MamA	1
Rv3324A	24	HsdM	2
Rv3324A	31	HsdM	2
Rv3368c	44	MamA	1
Rv3368c	47	MamA	1
Rv3717	52	MamA	1
Rv3717	49	MamA	1
Rv3916c	42	MamA	1
Rv3916c	45	MamA	1
Rv0497	54	MamB	1
rho	38	MamA	1
rho	35	MamA	1
Rv2280	63	MamA	1
Rv2280	60	MamA	1
Rv2295	31	HsdM	1
Rv2295	24	HsdM	1
no_downstream_cds	12	MamA	1
no_downstream_cds	9	MamA	1
Rv3192	21	MamB	1
Rv3361c	65	MamA	1
Rv3361c	68	MamA	1
PE27A	33	MamA	1
PE27A	36	MamA	1
PE27A	95	MamB	1
Rv0876c	62	MamA	1
PE9	2	MamB	2
Rv1435c	50	MamB	1
fdhD	36	HsdM	1
fdhD	43	HsdM	1
lepB	30	MamA	1
lepB	33	MamA	1
echA3	88	MamA	1
echA3	91	MamA	1
no_downstream_cds	22	MamA	1
Rv3127	6	HsdM	1
Rv3128c	74	HsdM	1
tgs1	66	HsdM	1
tgs1	73	HsdM	1
devS	7	MamB	1
devS	40	MamA	1
devS	43	MamA	1
Rv0176	97	MamB	2
Rv0837c	42	MamB	1
Rv0843	89	MamA	1
Rv0843	86	MamA	1
pip	30	MamA	1
pip	33	MamA	1
Rv1042c	43	MamA	1
Rv1042c	46	MamA	1
lppR	68	HsdM	1
lppR	75	HsdM	1
Rv2405	89	MamA	1
Rv2405	86	MamA	1
no_downstream_cds	100	MamA	3
Rv0976c	31	MamB	1
sigE	88	MamA	1
sigE	85	MamA	1
PE_PGRS27	52	MamA	1
PE_PGRS27	55	MamA	1
rpfD	51	MamB	1
PE31	49	HsdM	1
PE31	42	HsdM	1
bpoA	67	MamA	1
bpoA	70	MamA	1
Rv1765A	32	MamB	1
PE_PGRS31	91	MamA	1
PE_PGRS31	88	MamA	1
Rv2161c	92	MamA	1
Rv2161c	95	MamA	1
nrdE	37	MamA	1
nrdE	40	MamA	1
nrdE	70	MamA	1
nrdE	73	MamA	1
Rv3050c	19	MamA	1
Rv3050c	22	MamA	1
Rv3047c	72	MamB	1
Rv2694c	43	MamA	1
Rv2694c	46	MamA	1
ppgK	49	MamA	1
sigA	66	MamA	1
sigA	63	MamA	1
Rv2961	23	MamA	1
Rv2961	20	MamA	1
Rv3382c	91	MamB	1
vapB46	46	MamB	2
Rv3916c	47	MamA	1
Rv3916c	50	MamA	1
Rv0038	62	MamA	1
Rv0038	59	MamA	1
Rv0142	46	MamA	1
Rv0142	43	MamA	1
Rv0141c	49	MamA	1
Rv0141c	52	MamA	1
Rv0145	77	MamB	1
mshA	90	MamA	1
mshA	87	MamA	1
Rv1813c	5	MamA	1
Rv1813c	8	MamA	1
Rv1824	21	MamA	1
Rv1824	18	MamA	1
garA	7	MamA	1
garA	4	MamA	1
Rv2177c	93	MamA	1
Rv2177c	96	MamA	1
Rv2370c	32	MamA	1
Rv2370c	35	MamA	1
amiA2	98	MamA	1
amiA2	95	MamA	1
Rv2183c	39	MamA	1
Rv2183c	42	MamA	1
recO	1	MamA	1
recO	4	MamA	1
Rv2361c	70	MamB	1
Rv2189c	0	MamB	1
Rv2191	52	MamA	1
Rv2191	49	MamA	1
ctaE	12	MamA	1
ctaE	9	MamA	1
qcrC	31	HsdM	1
qcrC	24	HsdM	1
Rv1757c	47	HsdM	1
Rv1757c	54	HsdM	1
ctaC	0	MamB	1
no_downstream_cds	19	MamB	1
vapB23	72	MamB	1
Rv3190A	27	MamA	1
Rv3190A	24	MamA	1
Rv1765A	19	MamB	1
Rv3378c	34	HsdM	1
Rv3378c	41	HsdM	1
Rv1482c	3	MamA	1
Rv1482c	6	MamA	1
mazE4	49	MamA	1
mazE4	46	MamA	1
lipL	22	MamA	1
lipL	19	MamA	1
Rv1498A	91	MamA	1
Rv1498A	94	MamA	1
PE20	44	HsdM	1
PE20	37	HsdM	1
lppD	90	HsdM	2
lppD	97	HsdM	2
PPE38	78	MamA	1
PPE38	81	MamA	1
Rv2955c	63	MamA	1
Rv2955c	66	MamA	1
Rv3549c	60	MamA	1
Rv3549c	63	MamA	1
kstR	68	MamA	1
kstR	65	MamA	1
espA	30	MamA	1
espA	33	MamA	1
lpqG	99	HsdM	1
lpqG	92	HsdM	1
hpt	75	MamA	1
hpt	78	MamA	1
Rv3627c	64	MamA	1
Rv3627c	67	MamA	1
Rv3636	34	MamA	1
Rv3636	31	MamA	1
Rv3642c	79	HsdM	1
Rv3642c	86	HsdM	1
aftB	85	MamB	1
glf	5	HsdM	1
glf	12	HsdM	1
Rv3916c	43	MamA	1
Rv3916c	46	MamA	1
Rv1035c	72	MamA	1
Rv1035c	75	MamA	1
coaA	64	MamA	1
coaA	67	MamA	1
Rv1730c	83	MamA	1
Rv1730c	86	MamA	1
Rv1732c	14	MamB	1
Rv1765c	75	HsdM	1
Rv1765c	68	HsdM	1
vapB37	16	HsdM	1
vapB37	23	HsdM	1
Rv2172c	53	MamA	1
Rv2172c	56	MamA	1
Rv2172c	72	MamB	1
Rv2348c	24	HsdM	1
Rv2348c	31	HsdM	1
recO	10	MamB	1
recO	72	MamB	1
hrcA	96	MamB	1
hrcA	2	MamB	1
hemN	49	MamA	1
hemN	52	MamA	1
Rv2401	63	MamA	1
Rv2401	60	MamA	1
no_downstream_cds	8	MamA	1
no_downstream_cds	5	MamA	1
rubA	9	MamA	1
whiB2	80	MamB	1
PE22	58	MamA	1
PE22	55	MamA	1
hemE	11	MamA	1
hemE	14	MamA	1
no_downstream_cds	55	MamB	1
Rv0756c	24	HsdM	1
Rv0756c	31	HsdM	1
Rv0760c	58	MamA	1
Rv0760c	61	MamA	1
Rv0762c	61	MamA	1
Rv0762c	64	MamA	1
Rv0770	21	HsdM	1
Rv0770	14	HsdM	1
Rv2369c	20	MamB	1
TB15.3	16	HsdM	1
TB15.3	9	HsdM	1
Rv1639c	36	MamA	1
infC	14	MamA	1
Rv2077A	29	MamB	1
vapB37	14	HsdM	1
vapB37	21	HsdM	1
Rv2184c	57	HsdM	1
Rv2184c	64	HsdM	1
Rv3322c	24	MamB	1
sigM	1	MamA	1
Rv1490	82	MamA	1
Rv1490	79	MamA	1
no_downstream_cds	22	HsdM	1
PPE39	16	MamA	1
PPE39	19	MamA	1
glyS	29	MamA	1
glyS	32	MamA	1
hemN	89	MamA	1
hemN	92	MamA	1
Rv2859c	94	MamA	1
Rv2859c	97	MamA	1
vapB23	80	MamB	1
Rv3128c	49	MamB	1
Rv3190A	45	MamA	1
Rv3190A	42	MamA	1
Rv0731c	37	MamA	1
Rv0731c	40	MamA	1
no_downstream_cds	61	MamA	5
vapB46	0	MamA	1
vapB46	3	MamA	1
papA1	26	HsdM	1
papA1	33	HsdM	1
Rv2077A	25	MamA	2
Rv2077A	28	MamA	2
Rv2077A	87	MamB	2
Rv2168c	16	MamA	2
Rv2168c	13	MamA	2
pknL	55	MamB	1
Rv2285	35	HsdM	2
Rv2285	28	HsdM	2
Rv2288	27	MamA	2
Rv2288	24	MamA	2
Rv2437	71	MamB	1
Rv2437	12	MamA	1
Rv2437	9	MamA	1
no_downstream_cds	49	HsdM	1
no_downstream_cds	56	HsdM	1
vapB23	17	MamB	2
no_downstream_cds	7	HsdM	2
moaC3	76	MamA	2
moaC3	79	MamA	3
no_downstream_cds	29	MamA	2
no_downstream_cds	32	MamA	2
Rv2113	100	MamA	1
Rv0826	7	HsdM	1
Rv0826	14	HsdM	1
PPE24	24	HsdM	1
PPE24	31	HsdM	1
PPE38	53	MamA	1
PPE38	56	MamA	1
Rv0078A	55	HsdM	1
Rv0078A	62	HsdM	1
Rv0519c	31	MamB	1
gabP	99	MamB	1
csoR	68	MamA	1
csoR	65	MamA	1
Rv1359	31	HsdM	1
Rv1359	24	HsdM	1
Rv2355	44	MamA	1
Rv2355	47	MamA	1
adh	18	HsdM	1
adh	11	HsdM	1
Rv1531	47	MamB	1
Rv1770	38	MamA	1
Rv1770	35	MamA	1
Rv1772	94	MamA	1
Rv1772	91	MamA	1
hemE	62	MamA	1
hemE	65	MamA	1
no_downstream_cds	53	MamA	1
Rv2822c	57	HsdM	1
Rv2822c	64	HsdM	1
ppk2	95	MamA	1
ppk2	98	MamA	1
ppk2	18	MamB	1
moaC3	82	MamA	1
Rv2348c	12	HsdM	1
Rv2348c	19	HsdM	1
PPE34	60	HsdM	1
PPE34	67	HsdM	1
Rv1914c	9	MamA	1
Rv1914c	12	MamA	1
Rv2285	31	HsdM	1
Rv2285	24	HsdM	1
Rv2285	55	MamA	1
Rv2285	52	MamA	1
Rv2288	26	MamA	1
Rv2288	23	MamA	1
Rv0691A	6	MamA	1
no_downstream_cds	1	MamA	1
Rv0021c	97	MamB	2
plcC	24	HsdM	2
plcC	31	HsdM	2
Rv3128c	13	MamB	2
Rv3128c	51	MamA	2
Rv3128c	48	MamA	2
Rv3177	41	HsdM	2
Rv3177	34	HsdM	2
no_downstream_cds	1	HsdM	2
Rv3181c	24	HsdM	2
Rv3181c	31	HsdM	2
htdY	3	MamB	2
Rv0446c	1	MamB	1
PPE34	32	MamA	1
PPE34	35	MamA	1
Rv3381c	93	HsdM	1
rpsF	61	MamA	1
rpsF	58	MamA	1
echA3	54	MamA	1
echA3	57	MamA	1
hadA	63	MamB	1
Rv2802c	1	MamA	1
Rv2802c	2	MamA	1
Rv2813	3	MamB	1

## Sheet: Common SFBS promoters
TSS	MTase	bp upstream	SigA	SigB	SigC	SigF	SigG	SigI	SigK	# isolates	Promoter element	Strongest SF interaction			Legend
clpX	HsdM	0	no known SFBS	no known SFBS	-35	-35	no known SFBS	no known SFBS	no known SFBS	90	none identified	NA			TSS	The gene immediately downstream of the TSS.
Rv0318c	MamA	0	no known SFBS	-10	no known SFBS	no known SFBS	no known SFBS	no known SFBS	no known SFBS	87	none identified	NA			bp upstream	# bases that the methylation motif is upstream of the TSS. Strand is not taken into account, since DNA methylation can influence transcriptional activity regardless of strand.
Rv0446c	MamB	0	no known SFBS	-10	no known SFBS	no known SFBS	no known SFBS	-10	no known SFBS	92	none identified	NA
mkl	MamB	1	no known SFBS	-10	no known SFBS	no known SFBS	no known SFBS	no known SFBS	no known SFBS	56	none identified	NA
Rv0842	MamA	1	no known SFBS	-10	no known SFBS	no known SFBS	no known SFBS	no known SFBS	no known SFBS	86	none identified	NA			MTase	Which Mtase the methylaiton motif belongs to
Rv2285	MamB	1	no known SFBS	-10	no known SFBS	no known SFBS	no known SFBS	no known SFBS	no known SFBS	66	none identified	NA			# isolates	The number of MTBC isolates with the specifiied methylation motif/TSS configuatation. (of 93 analyzed)
yajC	MamB	1	no known SFBS	-10	no known SFBS	no known SFBS	no known SFBS	-10	no known SFBS	88	none identified	NA
Rv2628	MamA	1	no known SFBS	-10	no known SFBS	no known SFBS	no known SFBS	no known SFBS	no known SFBS	86	none identified	NA			Promoter element	Ful l Promoters mean the Mtase motif overlaps a SFBS in the correct poisition with respect to the TSS, and that promoter has the other promoter element in its canonical position, with a reasonably sized spacer region spanning the elements. Unknown elements mean the Mtase motif overlaps the correct distance upstream the TSS for an SFBS to bind, but does not match any known SFBS motif.
Rv3829c	MamA	1	no known SFBS	-10	no known SFBS	no known SFBS	no known SFBS	no known SFBS	no known SFBS	93	none identified	NA
Rv0149	MamA	2	no known SFBS	-10	no known SFBS	no known SFBS	no known SFBS	no known SFBS	no known SFBS	87	none identified	NA
Rv1482c	MamA	2	no known SFBS	-10	no known SFBS	no known SFBS	no known SFBS	no known SFBS	no known SFBS	93	none identified	NA
PE_PGRS62	MamA	2	no known SFBS	-10	no known SFBS	no known SFBS	no known SFBS	no known SFBS	no known SFBS	93	none identified	NA
sigM	MamA	2	no known SFBS	-10	no known SFBS	no known SFBS	no known SFBS	no known SFBS	no known SFBS	78	none identified	NA
glnA3	HsdM	3	no known SFBS	no known SFBS	no known SFBS	no known SFBS	no known SFBS	no known SFBS	no known SFBS	90	none	NA			Strongest SF interaction	Thje Sigma Factor (SF) with the strongest interaction (as defined by the value in the Promoter element column). In case of ties, multiple sigma factors are listed.
mmsB	MamA	3	no known SFBS	-10	no known SFBS	no known SFBS	no known SFBS	-10	no known SFBS	85	none identified	NA
Rv0784	MamA	3	no known SFBS	-10	no known SFBS	no known SFBS	no known SFBS	no known SFBS	no known SFBS	87	none identified	NA
Rv1358	MamA	3	no known SFBS	-10	no known SFBS	no known SFBS	no known SFBS	-10	no known SFBS	84	none identified	NA
rplU	MamA	3	no known SFBS	-10	no known SFBS	no known SFBS	no known SFBS	-10	no known SFBS	94	none identified	NA
Rv2556c	MamA	3	no known SFBS	-10	no known SFBS	no known SFBS	no known SFBS	no known SFBS	no known SFBS	91	none identified	NA
PE_PGRS60	MamA	3	no known SFBS	-10	no known SFBS	no known SFBS	no known SFBS	-10	no known SFBS	68	none identified	NA
Rv3481c	HsdM	4	no known SFBS	no known SFBS	no known SFBS	no known SFBS	no known SFBS	no known SFBS	no known SFBS	91	none	NA
Rv0039c	MamA	4	no known SFBS	-10	no known SFBS	no known SFBS	no known SFBS	-10	no known SFBS	93	none identified	NA
Rv0102	MamA	4	no known SFBS	-10	no known SFBS	no known SFBS	no known SFBS	no known SFBS	no known SFBS	94	none identified	NA
Rv0138	MamA	4	no known SFBS	-10	no known SFBS	no known SFBS	no known SFBS	no known SFBS	no known SFBS	93	none identified	NA
Rv0365c	MamA	4	no known SFBS	-10	no known SFBS	no known SFBS	no known SFBS	-10	no known SFBS	93	none identified	NA
Rv0799c	MamA	4	no known SFBS	-10	no known SFBS	no known SFBS	no known SFBS	-10	no known SFBS	91	none identified	NA
Rv0842	MamA	4	no known SFBS	-10	no known SFBS	no known SFBS	no known SFBS	no known SFBS	no known SFBS	86	none identified	NA
Rv0898c	MamA	4	no known SFBS	-10	no known SFBS	no known SFBS	no known SFBS	no known SFBS	no known SFBS	70	none identified	NA
Rv1049	MamA	4	no known SFBS	-10	no known SFBS	no known SFBS	no known SFBS	-10	no known SFBS	91	none identified	NA
Rv1230c	HsdM	4	no known SFBS	no known SFBS	no known SFBS	no known SFBS	no known SFBS	-10	no known SFBS	93	none identified	NA
mmpL12	HsdM	4	no known SFBS	no known SFBS	no known SFBS	no known SFBS	no known SFBS	-10	no known SFBS	92	none identified	NA
Rv1597	MamA	4	no known SFBS	-10	no known SFBS	no known SFBS	no known SFBS	-10	no known SFBS	77	none identified	NA
Rv1813c	HsdM	4	no known SFBS	no known SFBS	no known SFBS	no known SFBS	no known SFBS	-10	no known SFBS	94	none identified	NA
Rv1817	MamA	4	no known SFBS	-10	no known SFBS	no known SFBS	no known SFBS	-10	no known SFBS	93	none identified	NA
lipT	HsdM	4	no known SFBS	no known SFBS	no known SFBS	no known SFBS	-10	-35	no known SFBS	93	none identified	NA
Rv2628	MamA	4	no known SFBS	-10	no known SFBS	no known SFBS	no known SFBS	-10	no known SFBS	86	none identified	NA
Rv3312A	HsdM	4	no known SFBS	-10	no known SFBS	no known SFBS	no known SFBS	-10	no known SFBS	79	none identified	NA
Rv3378c	MamA	4	no known SFBS	-10	no known SFBS	no known SFBS	no known SFBS	no known SFBS	no known SFBS	60	none identified	NA
echA19	MamA	4	no known SFBS	-10	no known SFBS	no known SFBS	no known SFBS	no known SFBS	no known SFBS	89	none identified	NA
Rv3728	MamA	4	no known SFBS	-10	no known SFBS	no known SFBS	no known SFBS	no known SFBS	no known SFBS	93	none identified	NA
Rv3779	MamA	4	no known SFBS	-10	no known SFBS	no known SFBS	no known SFBS	-10	no known SFBS	93	none identified	NA
glf	HsdM	4	no known SFBS	no known SFBS	no known SFBS	no known SFBS	no known SFBS	-10	no known SFBS	92	none identified	NA
PE36	MamA	4	no known SFBS	-10	no known SFBS	no known SFBS	no known SFBS	no known SFBS	no known SFBS	93	none identified	NA
Rv2280	MamA	4	no known SFBS	-10	no known SFBS	no known SFBS	no known SFBS	-10	no known SFBS	32	none identified	NA
Rv0465c	MamA	4	no known SFBS	full	no known SFBS	no known SFBS	no known SFBS	-10	no known SFBS	87	Full Promoter	B
Rv0061c	HsdM	5	no known SFBS	no known SFBS	no known SFBS	no known SFBS	no known SFBS	-10	no known SFBS	88	none identified	NA
Rv0142	MamA	5	no known SFBS	-10	no known SFBS	no known SFBS	no known SFBS	no known SFBS	no known SFBS	91	none identified	NA
PE4	MamA	5	no known SFBS	-10	no known SFBS	no known SFBS	no known SFBS	no known SFBS	no known SFBS	89	none identified	NA
Rv0250c	HsdM	5	no known SFBS	no known SFBS	no known SFBS	no known SFBS	no known SFBS	-10	no known SFBS	94	none identified	NA
purB	HsdM	5	no known SFBS	no known SFBS	no known SFBS	no known SFBS	no known SFBS	-10	no known SFBS	90	none identified	NA
glpX	HsdM	5	no known SFBS	-10	no known SFBS	no known SFBS	no known SFBS	-10	no known SFBS	84	none identified	NA
rpoZ	MamB	5	no known SFBS	-10	no known SFBS	no known SFBS	no known SFBS	no known SFBS	no known SFBS	93	none identified	NA
truB	HsdM	5	no known SFBS	-10	no known SFBS	no known SFBS	no known SFBS	no known SFBS	no known SFBS	93	none identified	NA
Rv2825c	HsdM	5	no known SFBS	-10	no known SFBS	no known SFBS	no known SFBS	-10	no known SFBS	93	none identified	NA
Rv2969c	HsdM	5	no known SFBS	-10	no known SFBS	no known SFBS	no known SFBS	-10	-35	89	none identified	NA
whiB7	MamA	5	no known SFBS	-10	no known SFBS	no known SFBS	no known SFBS	no known SFBS	no known SFBS	93	none identified	NA
Rv3583c	MamA	5	no known SFBS	-10	no known SFBS	no known SFBS	no known SFBS	no known SFBS	no known SFBS	92	none identified	NA
corA	MamA	5	no known SFBS	full	no known SFBS	no known SFBS	no known SFBS	-10	no known SFBS	93	Full Promoter	B
Rv1482c	MamA	5	no known SFBS	-10	no known SFBS	no known SFBS	no known SFBS	full	no known SFBS	93	Full Promoter	I
fdxD	MamA	5	no known SFBS	full	no known SFBS	no known SFBS	no known SFBS	-10	no known SFBS	92	Full Promoter	B
mshD	HsdM	6	no known SFBS	no known SFBS	no known SFBS	no known SFBS	no known SFBS	no known SFBS	no known SFBS	92	Unknown -10 element	NA
mmsB	MamA	6	no known SFBS	-10	no known SFBS	no known SFBS	no known SFBS	no known SFBS	no known SFBS	86	SigB -10 element	B
Rv1358	MamA	6	no known SFBS	-10	no known SFBS	-35	no known SFBS	no known SFBS	no known SFBS	84	SigB -10 element	B
Rv0826	HsdM	6	no known SFBS	no known SFBS	no known SFBS	no known SFBS	no known SFBS	full	no known SFBS	87	Full Promoter	I
rplU	MamA	6	no known SFBS	full	no known SFBS	no known SFBS	no known SFBS	no known SFBS	no known SFBS	94	Full Promoter	B
Rv2556c	MamA	6	no known SFBS	-10	no known SFBS	no known SFBS	no known SFBS	full	no known SFBS	92	Full Promoter	I
Rv0691A	MamA	7	no known SFBS	-10	no known SFBS	no known SFBS	no known SFBS	no known SFBS	no known SFBS	86	SigB -10 element	B
Rv0799c	MamA	7	no known SFBS	-10	no known SFBS	no known SFBS	no known SFBS	no known SFBS	no known SFBS	92	SigB -10 element	B
Rv0898c	MamA	7	no known SFBS	-10	no known SFBS	no known SFBS	no known SFBS	no known SFBS	no known SFBS	70	SigB -10 element	B
Rv1049	MamA	7	no known SFBS	-10	no known SFBS	no known SFBS	no known SFBS	no known SFBS	no known SFBS	91	SigB -10 element	B
Rv1597	MamA	7	no known SFBS	-10	no known SFBS	no known SFBS	no known SFBS	no known SFBS	no known SFBS	77	SigB -10 element	B
Rv1817	MamA	7	no known SFBS	-10	no known SFBS	no known SFBS	no known SFBS	no known SFBS	no known SFBS	93	SigB -10 element	B
Rv3779	MamA	7	no known SFBS	-10	no known SFBS	-35	no known SFBS	no known SFBS	no known SFBS	93	SigB -10 element	B
Rv2280	MamA	7	no known SFBS	-10	no known SFBS	no known SFBS	no known SFBS	no known SFBS	no known SFBS	63	SigB -10 element	B
Rv0039c	MamA	7	no known SFBS	full	no known SFBS	no known SFBS	no known SFBS	no known SFBS	no known SFBS	93	Full Promoter	B
Rv0102	MamA	7	full	-10	no known SFBS	no known SFBS	no known SFBS	no known SFBS	no known SFBS	94	Full Promoter	A
Rv0138	MamA	7	full	-10	no known SFBS	no known SFBS	no known SFBS	-10	no known SFBS	93	Full Promoter	A
Rv0365c	MamA	7	no known SFBS	full	no known SFBS	no known SFBS	no known SFBS	no known SFBS	no known SFBS	93	Full Promoter	B
mmpS4	MamA	7	full	-10	no known SFBS	no known SFBS	no known SFBS	no known SFBS	no known SFBS	93	Full Promoter	A
Rv0465c	MamA	7	no known SFBS	full	no known SFBS	no known SFBS	no known SFBS	no known SFBS	no known SFBS	88	Full Promoter	B
Rv2721c	MamA	7	no known SFBS	full	no known SFBS	no known SFBS	no known SFBS	no known SFBS	no known SFBS	94	Full Promoter	B
Rv3083	MamA	7	no known SFBS	full	no known SFBS	no known SFBS	no known SFBS	no known SFBS	no known SFBS	87	Full Promoter	B
Rv3378c	MamA	7	full	-10	no known SFBS	no known SFBS	no known SFBS	-10	no known SFBS	60	Full Promoter	A
echA19	MamA	7	full	-10	no known SFBS	no known SFBS	no known SFBS	-10	no known SFBS	89	Full Promoter	A
Rv3683	MamB	7	full	-10	no known SFBS	no known SFBS	no known SFBS	no known SFBS	no known SFBS	91	Full Promoter	A
Rv3728	MamA	7	full	-10	no known SFBS	no known SFBS	no known SFBS	no known SFBS	no known SFBS	93	Full Promoter	A
PE36	MamA	7	full	-10	no known SFBS	no known SFBS	no known SFBS	-10	no known SFBS	93	Full Promoter	A
Rv0007	MamB	8	no known SFBS	-10	no known SFBS	no known SFBS	no known SFBS	-10	no known SFBS	92	Multiple -10 elements	B,I
Rv0142	MamA	8	no known SFBS	-10	no known SFBS	no known SFBS	no known SFBS	no known SFBS	no known SFBS	91	SigB -10 element	B
PE4	MamA	8	full	-10	no known SFBS	no known SFBS	no known SFBS	no known SFBS	no known SFBS	89	Full Promoter	A
corA	MamA	8	full	full	no known SFBS	no known SFBS	no known SFBS	no known SFBS	no known SFBS	94	Full Promoter	A,B
lprD	HsdM	8	no known SFBS	full	no known SFBS	no known SFBS	no known SFBS	full	-35	82	Full Promoter	B,I
whiB7	MamA	8	full	-10	no known SFBS	no known SFBS	no known SFBS	no known SFBS	no known SFBS	93	Full Promoter	A
fdxD	MamA	8	no known SFBS	full	no known SFBS	no known SFBS	no known SFBS	no known SFBS	no known SFBS	92	Full Promoter	B
Rv3583c	MamA	8	full	-10	no known SFBS	no known SFBS	no known SFBS	no known SFBS	no known SFBS	92	Full Promoter	A
mazF1	HsdM	9	full	no known SFBS	no known SFBS	no known SFBS	no known SFBS	no known SFBS	no known SFBS	93	Full Promoter	A
glpX	HsdM	10	full	no known SFBS	no known SFBS	full	no known SFBS	full	no known SFBS	91	Full Promoter	A,F,I
TB15.3	HsdM	10	no known SFBS	no known SFBS	no known SFBS	-35	no known SFBS	full	no known SFBS	62	Full Promoter	I
glnA3	HsdM	10	no known SFBS	full	no known SFBS	-35	no known SFBS	no known SFBS	no known SFBS	90	Full Promoter	B
vapB28	HsdM	11	no known SFBS	no known SFBS	no known SFBS	no known SFBS	no known SFBS	full	no known SFBS	93	Full Promoter	I
Rv1230c	HsdM	11	full	full	no known SFBS	no known SFBS	no known SFBS	no known SFBS	no known SFBS	93	Full Promoter	A,B
mmpL12	HsdM	11	full	no known SFBS	no known SFBS	no known SFBS	no known SFBS	-10	no known SFBS	92	Full Promoter	A
Rv1813c	HsdM	11	full	no known SFBS	no known SFBS	-35	no known SFBS	full	no known SFBS	94	Full Promoter	A,I
lipT	HsdM	11	full	full	no known SFBS	full	no known SFBS	no known SFBS	no known SFBS	93	Full Promoter	A,B,C
Rv3312A	HsdM	11	full	no known SFBS	no known SFBS	no known SFBS	no known SFBS	-10	no known SFBS	79	Full Promoter	A
Rv3780	HsdM	11	full	no known SFBS	no known SFBS	no known SFBS	no known SFBS	full	no known SFBS	93	Full Promoter	A,I
glf	HsdM	11	full	full	no known SFBS	-35	no known SFBS	no known SFBS	no known SFBS	92	Full Promoter	A,B
Rv0250c	HsdM	12	-10	no known SFBS	no known SFBS	no known SFBS	no known SFBS	-10	no known SFBS	94	Multiple -10 elements	A,I
Rv0029	HsdM	12	full	no known SFBS	no known SFBS	no known SFBS	no known SFBS	full	no known SFBS	92	Full Promoter	A,I
Rv0061c	HsdM	12	full	no known SFBS	no known SFBS	no known SFBS	no known SFBS	no known SFBS	no known SFBS	88	Full Promoter	A
vapB28	HsdM	12	full	no known SFBS	no known SFBS	no known SFBS	no known SFBS	full	no known SFBS	93	Full Promoter	A,I
purB	HsdM	12	full	full	no known SFBS	no known SFBS	no known SFBS	-10	no known SFBS	90	Full Promoter	A,B
Rv0863	HsdM	12	full	no known SFBS	no known SFBS	no known SFBS	no known SFBS	full	no known SFBS	78	Full Promoter	A,I
PE_PGRS21	HsdM	12	full	no known SFBS	no known SFBS	-35	no known SFBS	-10	no known SFBS	80	Full Promoter	A
PE12	HsdM	12	full	no known SFBS	no known SFBS	-35	no known SFBS	-10	no known SFBS	93	Full Promoter	A
adh	HsdM	12	full	no known SFBS	no known SFBS	no known SFBS	no known SFBS	full	no known SFBS	88	Full Promoter	A,I
PE_PGRS33	HsdM	12	full	no known SFBS	no known SFBS	no known SFBS	no known SFBS	no known SFBS	no known SFBS	91	Full Promoter	A
pafA	HsdM	12	full	no known SFBS	-35	no known SFBS	no known SFBS	no known SFBS	no known SFBS	88	Full Promoter	A
truB	HsdM	12	full	no known SFBS	no known SFBS	no known SFBS	no known SFBS	no known SFBS	no known SFBS	93	Full Promoter	A
Rv2825c	HsdM	12	full	no known SFBS	no known SFBS	no known SFBS	no known SFBS	-10	no known SFBS	93	Full Promoter	A
rubA	MamA	12	no known SFBS	full	no known SFBS	-35	no known SFBS	full	no known SFBS	89	Full Promoter	B,I
Rv3484	HsdM	12	full	no known SFBS	no known SFBS	-35	no known SFBS	full	no known SFBS	91	Full Promoter	A,I
PE_PGRS53	HsdM	12	full	no known SFBS	no known SFBS	no known SFBS	no known SFBS	no known SFBS	no known SFBS	93	Full Promoter	A
Rv3284	HsdM	12	full	-10	no known SFBS	no known SFBS	no known SFBS	full	no known SFBS	47	Full Promoter	A,I
mshD	HsdM	13	no known SFBS	no known SFBS	no known SFBS	no known SFBS	no known SFBS	no known SFBS	no known SFBS	92	Unknown -10 element	NA
gyrB	HsdM	13	full	no known SFBS	no known SFBS	no known SFBS	no known SFBS	no known SFBS	no known SFBS	92	Full Promoter	A
Rv0826	HsdM	13	full	no known SFBS	no known SFBS	no known SFBS	no known SFBS	no known SFBS	no known SFBS	87	Full Promoter	A
Rv1149	HsdM	13	full	no known SFBS	no known SFBS	no known SFBS	no known SFBS	no known SFBS	no known SFBS	85	Full Promoter	A
Rv1251c	HsdM	13	full	no known SFBS	no known SFBS	no known SFBS	no known SFBS	no known SFBS	no known SFBS	85	Full Promoter	A
Rv1944c	HsdM	13	full	no known SFBS	no known SFBS	no known SFBS	no known SFBS	no known SFBS	no known SFBS	87	Full Promoter	A
Rv2348c	HsdM	13	full	no known SFBS	no known SFBS	no known SFBS	no known SFBS	full	no known SFBS	73	Full Promoter	A,I
Rv2631	HsdM	13	full	no known SFBS	no known SFBS	no known SFBS	-35	full	no known SFBS	90	Full Promoter	A,I
argA	HsdM	13	full	no known SFBS	no known SFBS	-35	no known SFBS	no known SFBS	no known SFBS	93	Full Promoter	A
Rv3127	HsdM	13	full	no known SFBS	no known SFBS	-35	no known SFBS	no known SFBS	no known SFBS	84	Full Promoter	A
Rv3312c	HsdM	13	full	-10	no known SFBS	-35	no known SFBS	full	no known SFBS	79	Full Promoter	A,I
Rv1089A	MamB	14	no known SFBS	-10	no known SFBS	no known SFBS	no known SFBS	no known SFBS	no known SFBS	57	SigB -10 element	B
Rv1986	MamA	14	no known SFBS	-10	no known SFBS	no known SFBS	no known SFBS	full	no known SFBS	92	Full Promoter	I
Rv2305	MamA	14	no known SFBS	full	no known SFBS	no known SFBS	no known SFBS	full	no known SFBS	89	Full Promoter	B,I
Rv2280	MamA	14	no known SFBS	-10	no known SFBS	no known SFBS	no known SFBS	full	no known SFBS	31	Full Promoter	I
Rv0247c	MamA	15	no known SFBS	-10	no known SFBS	no known SFBS	no known SFBS	-10	no known SFBS	88	none identified	NA
Rv1779c	MamA	15	no known SFBS	-10	no known SFBS	no known SFBS	no known SFBS	no known SFBS	no known SFBS	88	none identified	NA
PPE25	HsdM	15	-10	no known SFBS	no known SFBS	-35	no known SFBS	no known SFBS	no known SFBS	91	none identified	NA
drrA	MamA	15	no known SFBS	-10	no known SFBS	no known SFBS	no known SFBS	no known SFBS	no known SFBS	93	none identified	NA
rubA	MamA	15	no known SFBS	-10	no known SFBS	no known SFBS	no known SFBS	no known SFBS	no known SFBS	88	none identified	NA
vapB37	HsdM	15	no known SFBS	no known SFBS	no known SFBS	no known SFBS	no known SFBS	-10	no known SFBS	43	none identified	NA
infC	MamA	15	no known SFBS	full	no known SFBS	no known SFBS	no known SFBS	no known SFBS	no known SFBS	78	Full Promoter	B
lppL	MamA	15	no known SFBS	-10	no known SFBS	no known SFBS	no known SFBS	full	no known SFBS	88	Full Promoter	I
Rv2721c	MamA	15	no known SFBS	-10	no known SFBS	no known SFBS	no known SFBS	full	no known SFBS	93	Full Promoter	I
Rv0190	MamB	16	no known SFBS	-10	no known SFBS	no known SFBS	no known SFBS	no known SFBS	no known SFBS	93	none identified	NA
mazF1	HsdM	16	no known SFBS	no known SFBS	no known SFBS	no known SFBS	no known SFBS	-10	no known SFBS	93	none identified	NA
glyS	MamA	16	no known SFBS	-10	no known SFBS	no known SFBS	no known SFBS	-10	no known SFBS	85	none identified	NA
nadD	MamA	16	no known SFBS	-10	no known SFBS	no known SFBS	no known SFBS	no known SFBS	no known SFBS	94	none identified	NA
TB15.3	HsdM	17	no known SFBS	no known SFBS	no known SFBS	no known SFBS	-10	-10	no known SFBS	62	none identified	NA
Rv1986	MamA	17	no known SFBS	-10	no known SFBS	no known SFBS	no known SFBS	no known SFBS	no known SFBS	92	none identified	NA
Rv2136c	MamA	17	no known SFBS	-10	no known SFBS	no known SFBS	no known SFBS	no known SFBS	no known SFBS	88	none identified	NA
Rv2456c	MamA	17	no known SFBS	-10	no known SFBS	no known SFBS	no known SFBS	-10	no known SFBS	93	none identified	NA
Rv2305	MamA	17	no known SFBS	full	no known SFBS	no known SFBS	no known SFBS	no known SFBS	no known SFBS	88	Full Promoter	B
gyrB	HsdM	18	no known SFBS	no known SFBS	no known SFBS	no known SFBS	-10	-10	no known SFBS	92	none identified	NA
Rv0247c	MamA	18	no known SFBS	-10	no known SFBS	no known SFBS	no known SFBS	no known SFBS	no known SFBS	88	none identified	NA
citA	MamA	18	no known SFBS	-10	no known SFBS	no known SFBS	no known SFBS	no known SFBS	no known SFBS	94	none identified	NA
Rv1779c	MamA	18	no known SFBS	-10	no known SFBS	no known SFBS	no known SFBS	no known SFBS	no known SFBS	88	none identified	NA
drrA	MamA	18	no known SFBS	-10	no known SFBS	no known SFBS	no known SFBS	no known SFBS	no known SFBS	93	none identified	NA
tgs3	MamB	18	no known SFBS	-10	no known SFBS	no known SFBS	no known SFBS	full	no known SFBS	90	Full Promoter	I
Rv0863	HsdM	19	no known SFBS	no known SFBS	no known SFBS	no known SFBS	no known SFBS	no known SFBS	no known SFBS	78	none	NA
Rv2315c	MamA	19	no known SFBS	-35	no known SFBS	no known SFBS	no known SFBS	no known SFBS	no known SFBS	88	none identified	NA
Rv0893c	MamA	19	no known SFBS	-10	no known SFBS	no known SFBS	no known SFBS	-10	no known SFBS	94	none identified	NA
PE_PGRS21	HsdM	19	no known SFBS	no known SFBS	no known SFBS	no known SFBS	no known SFBS	-10	no known SFBS	80	none identified	NA
PE12	HsdM	19	no known SFBS	no known SFBS	no known SFBS	no known SFBS	no known SFBS	-10	no known SFBS	93	none identified	NA
Rv1219c	HsdM	19	-10	no known SFBS	no known SFBS	no known SFBS	no known SFBS	no known SFBS	no known SFBS	93	none identified	NA
adh	HsdM	19	no known SFBS	-10	no known SFBS	no known SFBS	no known SFBS	no known SFBS	no known SFBS	88	none identified	NA
PE_PGRS33	HsdM	19	no known SFBS	no known SFBS	no known SFBS	no known SFBS	-10	-10	no known SFBS	91	none identified	NA
pafA	HsdM	19	no known SFBS	no known SFBS	no known SFBS	no known SFBS	no known SFBS	-10	no known SFBS	88	none identified	NA
glyS	MamA	19	no known SFBS	-10	no known SFBS	no known SFBS	no known SFBS	no known SFBS	no known SFBS	85	none identified	NA
dnaJ2	MamB	19	no known SFBS	-10	no known SFBS	no known SFBS	no known SFBS	-10	no known SFBS	91	none identified	NA
nadD	MamA	19	no known SFBS	-10	no known SFBS	-35	no known SFBS	-10	no known SFBS	94	none identified	NA
hrp1	MamA	19	no known SFBS	-10	no known SFBS	no known SFBS	no known SFBS	no known SFBS	no known SFBS	91	none identified	NA
PE_PGRS53	HsdM	19	no known SFBS	no known SFBS	no known SFBS	no known SFBS	no known SFBS	-10	no known SFBS	93	none identified	NA
Rv3284	HsdM	19	no known SFBS	-10	no known SFBS	no known SFBS	-10	-10	no known SFBS	47	none identified	NA
Rv2348c	HsdM	20	no known SFBS	no known SFBS	no known SFBS	-35	no known SFBS	no known SFBS	no known SFBS	73	none identified	NA
Rv0767c	MamB	20	no known SFBS	-10	no known SFBS	no known SFBS	no known SFBS	-10	no known SFBS	89	none identified	NA
Rv0919	HsdM	20	no known SFBS	-10	no known SFBS	no known SFBS	no known SFBS	no known SFBS	no known SFBS	94	none identified	NA
PE_PGRS20	MamA	20	no known SFBS	-10	no known SFBS	no known SFBS	no known SFBS	-10	no known SFBS	74	none identified	NA
Rv1149	HsdM	20	no known SFBS	-10	no known SFBS	no known SFBS	no known SFBS	-10	no known SFBS	85	none identified	NA
Rv1251c	HsdM	20	no known SFBS	-10	no known SFBS	no known SFBS	no known SFBS	-10	-35	85	none identified	NA
lipL	MamA	20	no known SFBS	-10	no known SFBS	no known SFBS	no known SFBS	-10	no known SFBS	93	none identified	NA
Rv1944c	HsdM	20	no known SFBS	-10	no known SFBS	no known SFBS	no known SFBS	-10	no known SFBS	87	none identified	NA
Rv2044c	MamA	20	no known SFBS	-10	no known SFBS	no known SFBS	no known SFBS	-10	no known SFBS	93	none identified	NA
Rv2456c	MamA	20	no known SFBS	-10	no known SFBS	no known SFBS	no known SFBS	no known SFBS	no known SFBS	93	none identified	NA
Rv2631	HsdM	20	no known SFBS	-10	no known SFBS	no known SFBS	no known SFBS	-10	no known SFBS	90	none identified	NA
Rv3312c	HsdM	20	no known SFBS	no known SFBS	no known SFBS	no known SFBS	-10	no known SFBS	no known SFBS	79	none identified	NA
Rv0474	MamB	21	no known SFBS	-10	no known SFBS	no known SFBS	no known SFBS	no known SFBS	no known SFBS	93	none identified	NA
citA	MamA	21	no known SFBS	-10	no known SFBS	no known SFBS	no known SFBS	no known SFBS	no known SFBS	94	none identified	NA
mbtJ	MamA	21	no known SFBS	-10	no known SFBS	no known SFBS	no known SFBS	-10	no known SFBS	94	none identified	NA
Rv2401	MamA	21	no known SFBS	-10	no known SFBS	no known SFBS	no known SFBS	no known SFBS	no known SFBS	85	none identified	NA
PPE25	HsdM	22	no known SFBS	no known SFBS	no known SFBS	-35	no known SFBS	no known SFBS	no known SFBS	91	none identified	NA
vapB37	HsdM	22	no known SFBS	no known SFBS	no known SFBS	-35	no known SFBS	no known SFBS	no known SFBS	43	none identified	NA
echA3	MamA	22	no known SFBS	-10	no known SFBS	no known SFBS	no known SFBS	no known SFBS	no known SFBS	91	none identified	NA
Rv0893c	MamA	22	no known SFBS	-10	no known SFBS	no known SFBS	no known SFBS	no known SFBS	no known SFBS	94	none identified	NA
Rv2315c	MamA	22	no known SFBS	-10	no known SFBS	no known SFBS	no known SFBS	no known SFBS	no known SFBS	89	none identified	NA
hrp1	MamA	22	no known SFBS	-10	no known SFBS	no known SFBS	no known SFBS	no known SFBS	no known SFBS	91	none identified	NA
Rv2638	MamA	22	no known SFBS	-10	no known SFBS	no known SFBS	no known SFBS	no known SFBS	no known SFBS	92	none identified	NA
Rv1370c	MamA	22	no known SFBS	-10	no known SFBS	no known SFBS	no known SFBS	-10	no known SFBS	30	none identified	NA
Rv0585c	MamB	23	no known SFBS	-10	no known SFBS	no known SFBS	no known SFBS	no known SFBS	no known SFBS	93	none identified	NA
PE_PGRS20	MamA	23	no known SFBS	-10	no known SFBS	no known SFBS	no known SFBS	no known SFBS	no known SFBS	74	none identified	NA
lipL	MamA	23	no known SFBS	-10	no known SFBS	-35	no known SFBS	no known SFBS	no known SFBS	93	none identified	NA
Rv2044c	MamA	23	no known SFBS	-10	no known SFBS	no known SFBS	no known SFBS	no known SFBS	no known SFBS	93	none identified	NA
mbtJ	MamA	24	no known SFBS	-10	no known SFBS	no known SFBS	no known SFBS	no known SFBS	no known SFBS	94	none identified	NA
Rv2401	MamA	24	no known SFBS	-10	no known SFBS	no known SFBS	no known SFBS	no known SFBS	no known SFBS	85	none identified	NA
echA3	MamA	25	no known SFBS	-10	no known SFBS	no known SFBS	no known SFBS	no known SFBS	no known SFBS	92	none identified	NA
Rv0942	MamA	25	no known SFBS	-10	no known SFBS	no known SFBS	no known SFBS	no known SFBS	no known SFBS	93	none identified	NA
Rv2638	MamA	25	no known SFBS	-10	no known SFBS	no known SFBS	no known SFBS	-10	no known SFBS	91	none identified	NA
icd1	MamA	25	no known SFBS	-10	no known SFBS	no known SFBS	no known SFBS	no known SFBS	no known SFBS	88	none identified	NA
Rv1370c	MamA	25	no known SFBS	-10	no known SFBS	no known SFBS	no known SFBS	no known SFBS	no known SFBS	30	none identified	NA
Rv1219c	HsdM	26	no known SFBS	-10	no known SFBS	no known SFBS	no known SFBS	-10	no known SFBS	93	none identified	NA
Rv1615	MamB	26	no known SFBS	-10	no known SFBS	no known SFBS	no known SFBS	no known SFBS	no known SFBS	79	none identified	NA
rpmC	HsdM	26	no known SFBS	-10	no known SFBS	no known SFBS	no known SFBS	-10	-35	32	none identified	NA
Rv0306	MamA	27	no known SFBS	-10	no known SFBS	no known SFBS	no known SFBS	-10	no known SFBS	92	none identified	NA
pks6	MamA	27	no known SFBS	-10	no known SFBS	no known SFBS	no known SFBS	-10	no known SFBS	81	none identified	NA
Rv0919	HsdM	27	-10	no known SFBS	no known SFBS	no known SFBS	no known SFBS	-10	no known SFBS	94	none identified	NA
Rv3047c	MamA	27	no known SFBS	-10	no known SFBS	no known SFBS	no known SFBS	-10	no known SFBS	93	none identified	NA
ephA	MamA	27	no known SFBS	-10	no known SFBS	no known SFBS	no known SFBS	no known SFBS	no known SFBS	63	none identified	NA
glf	MamA	27	no known SFBS	-10	no known SFBS	no known SFBS	no known SFBS	-10	no known SFBS	93	none identified	NA
Rv0942	MamA	28	no known SFBS	-10	no known SFBS	no known SFBS	no known SFBS	no known SFBS	no known SFBS	93	unknown -35 element	NA
Rv1725c	MamB	28	no known SFBS	-10	no known SFBS	no known SFBS	no known SFBS	no known SFBS	no known SFBS	88	unknown -35 element	NA
Rv2077A	MamB	28	no known SFBS	-10	no known SFBS	no known SFBS	no known SFBS	-10	no known SFBS	87	unknown -35 element	NA
mshC	MamA	28	no known SFBS	-10	no known SFBS	no known SFBS	no known SFBS	-10	no known SFBS	93	unknown -35 element	NA
icd1	MamA	28	no known SFBS	-10	no known SFBS	no known SFBS	no known SFBS	no known SFBS	no known SFBS	88	unknown -35 element	NA
tgs1	MamA	28	-35	-10	no known SFBS	no known SFBS	no known SFBS	-10	no known SFBS	81	SigA -35 element	A
espC	HsdM	28	no known SFBS	no known SFBS	no known SFBS	-35	no known SFBS	-10	no known SFBS	65	SigF -35 element	F
Rv1036c	MamA	29	no known SFBS	-10	no known SFBS	no known SFBS	no known SFBS	-10	no known SFBS	92	unknown -35 element	NA
Rv1200	MamA	29	no known SFBS	-10	no known SFBS	no known SFBS	no known SFBS	-10	no known SFBS	93	unknown -35 element	NA
espA	MamA	29	no known SFBS	-10	no known SFBS	no known SFBS	no known SFBS	-10	no known SFBS	64	unknown -35 element	NA
Rv1760	MamB	29	no known SFBS	-10	no known SFBS	no known SFBS	no known SFBS	no known SFBS	no known SFBS	37	unknown -35 element	NA
Rv0306	MamA	30	no known SFBS	-10	no known SFBS	no known SFBS	no known SFBS	no known SFBS	no known SFBS	92	unknown -35 element	NA
pks6	MamA	30	no known SFBS	-10	no known SFBS	no known SFBS	no known SFBS	no known SFBS	no known SFBS	80	unknown -35 element	NA
PPE25	MamA	30	no known SFBS	-10	no known SFBS	no known SFBS	no known SFBS	-10	no known SFBS	91	unknown -35 element	NA
ephB	MamA	30	no known SFBS	-10	no known SFBS	no known SFBS	no known SFBS	no known SFBS	no known SFBS	93	unknown -35 element	NA
Rv2642	MamA	30	no known SFBS	-10	no known SFBS	no known SFBS	no known SFBS	-10	no known SFBS	91	unknown -35 element	NA
Rv3047c	MamA	30	no known SFBS	-10	no known SFBS	no known SFBS	no known SFBS	no known SFBS	no known SFBS	93	unknown -35 element	NA
glf	MamA	30	no known SFBS	-10	no known SFBS	no known SFBS	no known SFBS	no known SFBS	no known SFBS	93	unknown -35 element	NA
Rv1250	MamA	31	no known SFBS	-10	no known SFBS	no known SFBS	no known SFBS	no known SFBS	no known SFBS	85	unknown -35 element	NA
mshC	MamA	31	no known SFBS	-10	no known SFBS	no known SFBS	no known SFBS	no known SFBS	no known SFBS	93	unknown -35 element	NA
Rv2733c	HsdM	31	-10	-10	no known SFBS	no known SFBS	no known SFBS	no known SFBS	no known SFBS	93	unknown -35 element	NA
tgs1	MamA	31	no known SFBS	-10	no known SFBS	no known SFBS	no known SFBS	no known SFBS	no known SFBS	81	unknown -35 element	NA
PE_PGRS12	MamA	32	no known SFBS	-10	no known SFBS	no known SFBS	no known SFBS	no known SFBS	no known SFBS	91	unknown -35 element	NA
Rv1036c	MamA	32	no known SFBS	-10	no known SFBS	no known SFBS	no known SFBS	no known SFBS	no known SFBS	92	unknown -35 element	NA
Rv1200	MamA	32	no known SFBS	-10	no known SFBS	no known SFBS	no known SFBS	no known SFBS	no known SFBS	93	unknown -35 element	NA
espA	MamA	32	no known SFBS	-10	no known SFBS	no known SFBS	no known SFBS	no known SFBS	no known SFBS	64	unknown -35 element	NA
Rv3636	MamA	32	no known SFBS	-10	no known SFBS	no known SFBS	no known SFBS	-10	no known SFBS	65	unknown -35 element	NA
iniA	MamA	32	no known SFBS	full	no known SFBS	no known SFBS	no known SFBS	no known SFBS	no known SFBS	91	Full Promoter	B
cyp138	MamA	33	no known SFBS	-10	no known SFBS	no known SFBS	no known SFBS	-10	no known SFBS	92	unknown -35 element	NA
Rv0976c	MamA	33	no known SFBS	-10	no known SFBS	no known SFBS	no known SFBS	no known SFBS	no known SFBS	90	unknown -35 element	NA
PPE25	MamA	33	no known SFBS	-10	no known SFBS	no known SFBS	no known SFBS	no known SFBS	no known SFBS	91	unknown -35 element	NA
ephB	MamA	33	no known SFBS	-10	no known SFBS	no known SFBS	no known SFBS	no known SFBS	no known SFBS	93	unknown -35 element	NA
Rv2642	MamA	33	no known SFBS	-10	no known SFBS	no known SFBS	no known SFBS	no known SFBS	no known SFBS	90	unknown -35 element	NA
rplM	MamB	33	no known SFBS	-10	no known SFBS	no known SFBS	no known SFBS	no known SFBS	no known SFBS	80	unknown -35 element	NA
asd	MamB	33	no known SFBS	-10	no known SFBS	no known SFBS	no known SFBS	-10	no known SFBS	85	unknown -35 element	NA
rpmC	HsdM	33	no known SFBS	no known SFBS	no known SFBS	no known SFBS	no known SFBS	no known SFBS	no known SFBS	32	unknown -35 element	NA
Rv2172c	MamB	33	no known SFBS	-10	no known SFBS	no known SFBS	no known SFBS	-10	no known SFBS	43	unknown -35 element	NA
Rv0108c	MamA	34	no known SFBS	-10	no known SFBS	no known SFBS	no known SFBS	no known SFBS	no known SFBS	92	unknown -35 element	NA
Rv1250	MamA	34	no known SFBS	-10	no known SFBS	no known SFBS	no known SFBS	-10	no known SFBS	85	unknown -35 element	NA
ilvG	MamA	34	no known SFBS	-10	no known SFBS	no known SFBS	no known SFBS	no known SFBS	no known SFBS	92	unknown -35 element	NA
Rv3378c	MamB	34	no known SFBS	-10	no known SFBS	no known SFBS	no known SFBS	-10	no known SFBS	60	unknown -35 element	NA
iniA	MamA	35	no known SFBS	-10	no known SFBS	no known SFBS	no known SFBS	no known SFBS	no known SFBS	91	unknown -35 element	NA
PE_PGRS12	MamA	35	no known SFBS	-10	no known SFBS	no known SFBS	no known SFBS	-10	no known SFBS	90	unknown -35 element	NA
PE_PGRS15	MamA	35	no known SFBS	-10	no known SFBS	no known SFBS	no known SFBS	-10	no known SFBS	87	unknown -35 element	NA
glpX	MamA	35	no known SFBS	-10	no known SFBS	no known SFBS	no known SFBS	no known SFBS	no known SFBS	85	unknown -35 element	NA
Rv1639c	MamA	35	no known SFBS	-10	no known SFBS	no known SFBS	no known SFBS	-10	no known SFBS	74	unknown -35 element	NA
Rv2565	MamB	35	no known SFBS	-10	no known SFBS	no known SFBS	no known SFBS	no known SFBS	no known SFBS	91	unknown -35 element	NA
Rv2775	MamA	35	no known SFBS	-10	no known SFBS	no known SFBS	no known SFBS	no known SFBS	no known SFBS	92	unknown -35 element	NA
Rv3636	MamA	35	no known SFBS	-10	no known SFBS	no known SFBS	no known SFBS	no known SFBS	no known SFBS	65	unknown -35 element	NA
espC	HsdM	35	no known SFBS	no known SFBS	no known SFBS	full	no known SFBS	no known SFBS	no known SFBS	65	Full Promoter	F
cyp138	MamA	36	no known SFBS	-10	no known SFBS	no known SFBS	no known SFBS	no known SFBS	no known SFBS	92	unknown -35 element	NA
Rv0281	MamA	36	no known SFBS	-10	no known SFBS	no known SFBS	no known SFBS	-10	no known SFBS	89	unknown -35 element	NA
Rv0565c	MamA	36	no known SFBS	-10	no known SFBS	no known SFBS	no known SFBS	no known SFBS	no known SFBS	94	unknown -35 element	NA
Rv0976c	MamA	36	no known SFBS	-10	no known SFBS	no known SFBS	no known SFBS	-10	no known SFBS	90	unknown -35 element	NA
Rv2556c	MamA	36	no known SFBS	-10	no known SFBS	no known SFBS	no known SFBS	no known SFBS	no known SFBS	91	unknown -35 element	NA
Rv0108c	MamA	37	no known SFBS	-10	no known SFBS	no known SFBS	no known SFBS	no known SFBS	no known SFBS	92	unknown -35 element	NA
fadD7	MamA	37	no known SFBS	-10	no known SFBS	no known SFBS	no known SFBS	no known SFBS	no known SFBS	87	unknown -35 element	NA
atsD	MamA	37	no known SFBS	-10	no known SFBS	no known SFBS	no known SFBS	no known SFBS	no known SFBS	93	unknown -35 element	NA
Rv0942	MamA	37	no known SFBS	-10	no known SFBS	no known SFBS	no known SFBS	-10	no known SFBS	93	unknown -35 element	NA
mpt63	MamA	37	no known SFBS	-10	no known SFBS	no known SFBS	no known SFBS	no known SFBS	no known SFBS	93	unknown -35 element	NA
ilvG	MamA	37	no known SFBS	-10	no known SFBS	-35	no known SFBS	no known SFBS	no known SFBS	92	SigF -35 element	F
pepD	MamA	38	no known SFBS	-10	no known SFBS	no known SFBS	no known SFBS	no known SFBS	no known SFBS	93	unknown -35 element	NA
glpX	MamA	38	no known SFBS	-10	no known SFBS	no known SFBS	no known SFBS	no known SFBS	no known SFBS	85	unknown -35 element	NA
amiB2	MamA	38	no known SFBS	-10	no known SFBS	no known SFBS	no known SFBS	no known SFBS	no known SFBS	84	unknown -35 element	NA
lprD	HsdM	38	no known SFBS	no known SFBS	no known SFBS	no known SFBS	no known SFBS	no known SFBS	no known SFBS	80	unknown -35 element	NA
ldtB	HsdM	38	no known SFBS	-10	no known SFBS	no known SFBS	no known SFBS	no known SFBS	no known SFBS	63	unknown -35 element	NA
Rv2775	MamA	38	no known SFBS	-10	no known SFBS	no known SFBS	no known SFBS	no known SFBS	no known SFBS	91	unknown -35 element	NA
Rv3208	MamA	38	no known SFBS	-10	no known SFBS	no known SFBS	no known SFBS	no known SFBS	no known SFBS	88	unknown -35 element	NA
Rv3688c	MamA	38	no known SFBS	-10	no known SFBS	no known SFBS	no known SFBS	no known SFBS	no known SFBS	85	unknown -35 element	NA
tcrY	MamA	38	no known SFBS	-10	no known SFBS	no known SFBS	no known SFBS	no known SFBS	no known SFBS	93	unknown -35 element	NA
PE_PGRS62	MamA	38	no known SFBS	-10	no known SFBS	no known SFBS	no known SFBS	-10	no known SFBS	87	unknown -35 element	NA
PE_PGRS15	MamA	38	no known SFBS	-10	no known SFBS	-35	no known SFBS	no known SFBS	no known SFBS	87	SigF -35 element	F
Rv2733c	HsdM	38	no known SFBS	no known SFBS	-35	full	no known SFBS	no known SFBS	no known SFBS	93	Full Promoter	F
Rv0281	MamA	39	no known SFBS	-10	no known SFBS	no known SFBS	no known SFBS	no known SFBS	no known SFBS	89	unknown -35 element	NA
Rv0565c	MamA	39	no known SFBS	-10	no known SFBS	no known SFBS	no known SFBS	no known SFBS	no known SFBS	94	unknown -35 element	NA
Rv2360c	MamA	39	no known SFBS	-10	no known SFBS	no known SFBS	no known SFBS	no known SFBS	no known SFBS	90	unknown -35 element	NA
Rv2556c	MamA	39	no known SFBS	-10	no known SFBS	no known SFBS	no known SFBS	no known SFBS	no known SFBS	92	unknown -35 element	NA
Rv3058c	MamA	39	no known SFBS	-10	no known SFBS	no known SFBS	no known SFBS	no known SFBS	no known SFBS	86	unknown -35 element	NA
gltB	MamB	39	no known SFBS	-10	no known SFBS	no known SFBS	no known SFBS	no known SFBS	no known SFBS	90	unknown -35 element	NA
birA	MamA	39	no known SFBS	-10	no known SFBS	no known SFBS	no known SFBS	no known SFBS	no known SFBS	43	unknown -35 element	NA
fadD7	MamA	40	no known SFBS	-10	no known SFBS	no known SFBS	no known SFBS	-10	no known SFBS	87	unknown -35 element	NA
Rv0176	MamB	40	no known SFBS	-10	no known SFBS	no known SFBS	no known SFBS	no known SFBS	no known SFBS	90	unknown -35 element	NA
PE_PGRS5	MamA	40	no known SFBS	-10	no known SFBS	no known SFBS	no known SFBS	no known SFBS	no known SFBS	86	unknown -35 element	NA
atsD	MamA	40	no known SFBS	-10	no known SFBS	no known SFBS	no known SFBS	no known SFBS	no known SFBS	92	unknown -35 element	NA
Rv0942	MamA	40	no known SFBS	-10	no known SFBS	no known SFBS	no known SFBS	no known SFBS	no known SFBS	93	unknown -35 element	NA
oppB	MamA	40	no known SFBS	-10	no known SFBS	no known SFBS	no known SFBS	no known SFBS	no known SFBS	69	unknown -35 element	NA
rubA	MamA	40	no known SFBS	-10	no known SFBS	no known SFBS	no known SFBS	-10	no known SFBS	89	unknown -35 element	NA
mpt63	MamA	40	no known SFBS	-10	no known SFBS	-35	no known SFBS	no known SFBS	no known SFBS	93	SigF -35 element	F
Rv3202c	MamA	40	no known SFBS	-10	no known SFBS	full	no known SFBS	no known SFBS	no known SFBS	93	Full Promoter	F
pepD	MamA	41	no known SFBS	-10	no known SFBS	no known SFBS	no known SFBS	no known SFBS	no known SFBS	93	unknown -35 element	NA
Rv1211	MamA	41	no known SFBS	-10	no known SFBS	no known SFBS	no known SFBS	-10	no known SFBS	91	unknown -35 element	NA
amiB2	MamA	41	no known SFBS	-10	no known SFBS	no known SFBS	no known SFBS	no known SFBS	no known SFBS	84	unknown -35 element	NA
pgsA3	HsdM	41	no known SFBS	-10	no known SFBS	no known SFBS	no known SFBS	-10	no known SFBS	90	unknown -35 element	NA
Rv3208	MamA	41	no known SFBS	-10	no known SFBS	no known SFBS	no known SFBS	no known SFBS	no known SFBS	88	unknown -35 element	NA
Rv3688c	MamA	41	no known SFBS	-10	no known SFBS	no known SFBS	no known SFBS	-10	no known SFBS	85	unknown -35 element	NA
tcrY	MamA	41	no known SFBS	-10	no known SFBS	no known SFBS	no known SFBS	no known SFBS	no known SFBS	93	unknown -35 element	NA
PE31	HsdM	41	no known SFBS	no known SFBS	no known SFBS	-35	no known SFBS	-10	no known SFBS	88	SigF -35 element	F
Rv0108c	MamB	42	no known SFBS	-10	no known SFBS	no known SFBS	no known SFBS	no known SFBS	no known SFBS	93	unknown -35 element	NA
Rv2360c	MamA	42	no known SFBS	-10	no known SFBS	no known SFBS	no known SFBS	-10	no known SFBS	90	unknown -35 element	NA
Rv3058c	MamA	42	no known SFBS	-10	no known SFBS	no known SFBS	no known SFBS	no known SFBS	no known SFBS	86	unknown -35 element	NA
birA	MamA	42	no known SFBS	-10	no known SFBS	no known SFBS	no known SFBS	-10	no known SFBS	43	unknown -35 element	NA
PE_PGRS5	MamA	43	no known SFBS	-10	no known SFBS	no known SFBS	no known SFBS	no known SFBS	no known SFBS	86	none identified	NA
ansP2	MamA	43	no known SFBS	-10	no known SFBS	no known SFBS	no known SFBS	no known SFBS	no known SFBS	87	none identified	NA
oppB	MamA	43	no known SFBS	-10	no known SFBS	no known SFBS	no known SFBS	-10	no known SFBS	69	none identified	NA
Rv3202c	MamA	43	no known SFBS	-10	no known SFBS	no known SFBS	no known SFBS	no known SFBS	no known SFBS	90	none identified	NA
rubA	MamA	43	no known SFBS	-10	no known SFBS	no known SFBS	no known SFBS	no known SFBS	no known SFBS	89	none identified	NA
trpS	MamA	43	no known SFBS	-10	no known SFBS	no known SFBS	no known SFBS	-10	no known SFBS	94	none identified	NA
htdY	MamB	43	no known SFBS	-10	no known SFBS	no known SFBS	no known SFBS	-10	no known SFBS	75	none identified	NA
Rv1085c	MamB	43	no known SFBS	-10	no known SFBS	no known SFBS	no known SFBS	no known SFBS	no known SFBS	55	none identified	NA
Rv3778c	HsdM	44	no known SFBS	no known SFBS	no known SFBS	no known SFBS	no known SFBS	no known SFBS	no known SFBS	93	none	NA
Rv1199c	HsdM	44	no known SFBS	-10	no known SFBS	no known SFBS	no known SFBS	-10	no known SFBS	92	none identified	NA
Rv1211	MamA	44	no known SFBS	-10	no known SFBS	no known SFBS	no known SFBS	no known SFBS	no known SFBS	91	none identified	NA
aspS	MamB	44	-10	-10	no known SFBS	no known SFBS	no known SFBS	no known SFBS	no known SFBS	88	none identified	NA
Rv0004	MamA	45	no known SFBS	-10	no known SFBS	no known SFBS	no known SFBS	-10	no known SFBS	94	none identified	NA
Rv0336	MamA	45	no known SFBS	-10	no known SFBS	no known SFBS	no known SFBS	no known SFBS	no known SFBS	83	none identified	NA
Rv1004c	MamB	45	no known SFBS	-10	no known SFBS	no known SFBS	no known SFBS	no known SFBS	no known SFBS	82	none identified	NA
ldtB	HsdM	45	no known SFBS	no known SFBS	no known SFBS	-35	no known SFBS	-10	no known SFBS	63	none identified	NA
PE35	MamA	45	no known SFBS	-10	no known SFBS	no known SFBS	no known SFBS	no known SFBS	no known SFBS	67	none identified	NA
ansP2	MamA	46	no known SFBS	-10	no known SFBS	no known SFBS	no known SFBS	no known SFBS	no known SFBS	87	none identified	NA
bcp	MamA	46	no known SFBS	-10	no known SFBS	no known SFBS	no known SFBS	no known SFBS	no known SFBS	67	none identified	NA
pks15	MamA	46	-10	-10	no known SFBS	no known SFBS	no known SFBS	-10	no known SFBS	93	none identified	NA
PPE50	MamA	46	no known SFBS	-10	no known SFBS	no known SFBS	no known SFBS	no known SFBS	no known SFBS	43	none identified	NA
trpS	MamA	46	no known SFBS	-10	no known SFBS	no known SFBS	no known SFBS	no known SFBS	no known SFBS	94	none identified	NA
dop	MamA	46	no known SFBS	-10	no known SFBS	no known SFBS	no known SFBS	-10	no known SFBS	43	none identified	NA
mazE4	MamA	47	no known SFBS	-10	no known SFBS	no known SFBS	no known SFBS	-10	no known SFBS	93	none identified	NA
Rv1772	HsdM	47	no known SFBS	no known SFBS	no known SFBS	no known SFBS	no known SFBS	-10	no known SFBS	78	none identified	NA
vapB46	MamB	47	no known SFBS	-10	no known SFBS	no known SFBS	no known SFBS	no known SFBS	no known SFBS	56	none identified	NA
rpmE	MamB	47	no known SFBS	-10	no known SFBS	no known SFBS	no known SFBS	no known SFBS	no known SFBS	32	none identified	NA
Rv0004	MamA	48	no known SFBS	-10	no known SFBS	no known SFBS	no known SFBS	no known SFBS	no known SFBS	94	none identified	NA
Rv0336	MamA	48	no known SFBS	-10	no known SFBS	no known SFBS	no known SFBS	no known SFBS	no known SFBS	83	none identified	NA
Rv1053c	MamA	48	no known SFBS	-10	no known SFBS	no known SFBS	no known SFBS	no known SFBS	no known SFBS	93	none identified	NA
Rv1531	MamB	48	no known SFBS	-10	no known SFBS	no known SFBS	no known SFBS	no known SFBS	no known SFBS	89	none identified	NA
higA	MamA	48	no known SFBS	-10	no known SFBS	no known SFBS	no known SFBS	no known SFBS	no known SFBS	91	none identified	NA
Rv2050	MamA	48	no known SFBS	-10	no known SFBS	no known SFBS	no known SFBS	no known SFBS	no known SFBS	93	none identified	NA
dacB2	MamA	48	no known SFBS	-10	no known SFBS	no known SFBS	no known SFBS	no known SFBS	no known SFBS	84	none identified	NA
PE31	HsdM	48	no known SFBS	no known SFBS	no known SFBS	no known SFBS	no known SFBS	-10	no known SFBS	88	none identified	NA
PE35	MamA	48	no known SFBS	-10	no known SFBS	no known SFBS	no known SFBS	-10	no known SFBS	68	none identified	NA
Rv3844	MamA	48	no known SFBS	-10	no known SFBS	no known SFBS	no known SFBS	-10	no known SFBS	76	none identified	NA
lprO	MamB	49	no known SFBS	-10	no known SFBS	no known SFBS	no known SFBS	no known SFBS	no known SFBS	94	none identified	NA
vapB25	MamA	49	no known SFBS	-10	no known SFBS	no known SFBS	no known SFBS	no known SFBS	no known SFBS	92	none identified	NA
bioF1	MamB	49	no known SFBS	-10	no known SFBS	no known SFBS	no known SFBS	-10	no known SFBS	94	none identified	NA
scoA	HsdM	49	no known SFBS	-10	no known SFBS	no known SFBS	no known SFBS	-10	no known SFBS	68	none identified	NA
bcp	MamA	49	no known SFBS	-10	no known SFBS	no known SFBS	no known SFBS	-10	no known SFBS	67	none identified	NA
pks15	MamA	49	no known SFBS	-10	no known SFBS	no known SFBS	no known SFBS	no known SFBS	no known SFBS	93	none identified	NA
PPE50	MamA	49	no known SFBS	-10	no known SFBS	no known SFBS	no known SFBS	no known SFBS	no known SFBS	43	none identified	NA
dop	MamA	49	no known SFBS	-10	no known SFBS	no known SFBS	no known SFBS	no known SFBS	no known SFBS	43	none identified	NA
Rv0358	MamA	50	no known SFBS	-10	no known SFBS	no known SFBS	no known SFBS	no known SFBS	no known SFBS	87	none identified	NA
mazE4	MamA	50	no known SFBS	-10	no known SFBS	no known SFBS	no known SFBS	no known SFBS	no known SFBS	93	none identified	NA
cydC	MamA	50	no known SFBS	-10	no known SFBS	no known SFBS	no known SFBS	-10	no known SFBS	79	none identified	NA

## Sheet: Frequently methylated promoters
MTase	TSS	Correctly placed SFBS match	Promoter element
HsdM	adh	A,I	full promoter
MamA	amiB2		-35 (no SFBS)
MamA	ansP2		-10 motif
HsdM	argA	A	full promoter
MamB	asd		-35 (no SFBS)
MamB	aspS		-10 motif
MamA	atsD		-35 (no SFBS)
MamA	bcp		-10 motif
MamB	bioF1		-10 motif
MamA	birA		-35 (no SFBS)
MamA	citA		-10 motif
HsdM	clpX		-35 motif
MamA	corA	B	full promoter
MamA	corA	A,B	full promoter
MamA	cydC		-10 motif
MamA	cyp138		-35 (no SFBS)
MamA	dacB2		-10 motif
MamB	dnaJ2		-10 motif
MamA	dop		-10 motif
MamA	drrA		-10 motif
MamA	echA19	A	full promoter
MamA	echA3		-10 motif
MamA	ephA		-10 motif
MamA	ephB		-35 (no SFBS)
MamA	espA		-35 (no SFBS)
HsdM	espC	F	full promoter
MamA	fadD7		-35 (no SFBS)
MamA	fdxD	B	full promoter
MamA	glf		-35 (no SFBS)
HsdM	glf	A,B	full promoter
HsdM	glnA3	B	full promoter
MamA	glpX		-35 (no SFBS)
HsdM	glpX	A,F,I	full promoter
MamB	gltB		-35 (no SFBS)
MamA	glyS		-10 motif
HsdM	gyrB	A	full promoter
MamA	higA		-10 motif
MamA	hrp1		-10 motif
MamB	htdY		-10 motif
MamA	icd1		-35 (no SFBS)
MamA	ilvG	F	-35 element
MamA	infC	B	full promoter
MamA	iniA	B	full promoter
HsdM	ldtB		-35 (no SFBS)
MamA	lipL		-10 motif
HsdM	lipT	A,B,C	full promoter
MamA	lppL	I	full promoter
HsdM	lprD	B,I	full promoter
MamB	lprO		-10 motif
MamA	mazE4		-10 motif
HsdM	mazF1	A	full promoter
MamA	mbtJ		-10 motif
MamB	mkl		-10 motif
HsdM	mmpL12	A	full promoter
MamA	mmpS4	A	full promoter
MamA	mmsB	B	-10 element
MamA	mpt63	F	-35 element
MamA	mshC		-35 (no SFBS)
HsdM	mshD		-10 (no SFBS)
MamA	nadD		-10 motif
MamA	oppB		-35 (no SFBS)
HsdM	pafA	A	full promoter
MamA	PE_PGRS12		-35 (no SFBS)
MamA	PE_PGRS15	F	-35 element
MamA	PE_PGRS20		-10 motif
HsdM	PE_PGRS21	A	full promoter
HsdM	PE_PGRS33	A	full promoter
MamA	PE_PGRS5		-35 (no SFBS)
HsdM	PE_PGRS53	A	full promoter
MamA	PE_PGRS60		-10 motif
MamA	PE_PGRS62		-35 (no SFBS)
HsdM	PE12	A	full promoter
HsdM	PE31	F	-35 element
MamA	PE35		-10 motif
MamA	PE36	A	full promoter
MamA	PE4	A	full promoter
MamA	pepD		-35 (no SFBS)
HsdM	pgsA3		-35 (no SFBS)
MamA	pks15		-10 motif
MamA	pks6		-35 (no SFBS)
HsdM	PPE25		-10 motif
MamA	PPE25		-35 (no SFBS)
MamA	PPE50		-10 motif
HsdM	purB	A,B	full promoter
MamB	rplM		-35 (no SFBS)
MamA	rplU	B	full promoter
HsdM	rpmC		-35 (no SFBS)
MamB	rpmE		-10 motif
MamB	rpoZ		-10 motif
MamA	rubA	B,I	full promoter
MamA	Rv0004		-10 motif
MamB	Rv0007	B,I	-10 element
HsdM	Rv0029	A,I	full promoter
MamA	Rv0039c	B	full promoter
HsdM	Rv0061c	A	full promoter
MamA	Rv0102	A	full promoter
MamA	Rv0108c		-35 (no SFBS)
MamB	Rv0108c		-35 (no SFBS)
MamA	Rv0138	A	full promoter
MamA	Rv0142	B	-10 element
MamA	Rv0149		-10 motif
MamB	Rv0176		-35 (no SFBS)
MamB	Rv0190		-10 motif
MamA	Rv0247c		-10 motif
HsdM	Rv0250c	A,I	-10 element
MamA	Rv0281		-35 (no SFBS)
MamA	Rv0306		-35 (no SFBS)
MamA	Rv0318c		-10 motif
MamA	Rv0336		-10 motif
MamA	Rv0358		-10 motif
MamA	Rv0365c	B	full promoter
MamB	Rv0446c		-10 motif
MamA	Rv0465c	B	full promoter
MamB	Rv0474		-10 motif
MamA	Rv0565c		-35 (no SFBS)
MamB	Rv0585c		-10 motif
MamA	Rv0691A	B	-10 element
MamB	Rv0767c		-10 motif
MamA	Rv0784		-10 motif
MamA	Rv0799c	B	-10 element
HsdM	Rv0826	I	full promoter
HsdM	Rv0826	A	full promoter
MamA	Rv0842		-10 motif
HsdM	Rv0863	A,I	full promoter
MamA	Rv0893c		-10 motif
MamA	Rv0898c	B	-10 element
HsdM	Rv0919		-10 motif
MamA	Rv0942		-35 (no SFBS)
MamA	Rv0976c		-35 (no SFBS)
MamB	Rv1004c		-10 motif
MamA	Rv1036c		-35 (no SFBS)
MamA	Rv1049	B	-10 element
MamA	Rv1053c		-10 motif
MamB	Rv1085c		-10 motif
MamB	Rv1089A	B	-10 element
HsdM	Rv1149	A	full promoter
HsdM	Rv1199c		-10 motif
MamA	Rv1200		-35 (no SFBS)
MamA	Rv1211		-35 (no SFBS)
HsdM	Rv1219c		-10 motif
HsdM	Rv1230c	A,B	full promoter
MamA	Rv1250		-35 (no SFBS)
HsdM	Rv1251c	A	full promoter
MamA	Rv1358	B	-10 element
MamA	Rv1370c		-10 motif
MamA	Rv1482c	I	full promoter
MamB	Rv1531		-10 motif
MamA	Rv1597	B	-10 element
MamB	Rv1615		-10 motif
MamA	Rv1639c		-35 (no SFBS)
MamB	Rv1725c		-35 (no SFBS)
MamB	Rv1760		-35 (no SFBS)
HsdM	Rv1772		-10 motif
MamA	Rv1779c		-10 motif
HsdM	Rv1813c	A,I	full promoter
MamA	Rv1817	B	-10 element
HsdM	Rv1944c	A	full promoter
MamA	Rv1986	I	full promoter
MamA	Rv2044c		-10 motif
MamA	Rv2050		-10 motif
MamB	Rv2077A		-35 (no SFBS)
MamA	Rv2136c		-10 motif
MamB	Rv2172c		-35 (no SFBS)
MamA	Rv2280	I	full promoter
MamB	Rv2285		-10 motif
MamA	Rv2305	B,I	full promoter
MamA	Rv2305	B	full promoter
MamA	Rv2315c		-10 motif
HsdM	Rv2348c	A,I	full promoter
MamA	Rv2360c		-35 (no SFBS)
MamA	Rv2401		-10 motif
MamA	Rv2456c		-10 motif
MamA	Rv2556c	I	full promoter
MamB	Rv2565		-35 (no SFBS)
MamA	Rv2628		-10 motif
HsdM	Rv2631	A,I	full promoter
MamA	Rv2638		-10 motif
MamA	Rv2642		-35 (no SFBS)
MamA	Rv2721c	B	full promoter
MamA	Rv2721c	I	full promoter
HsdM	Rv2733c	F	full promoter
MamA	Rv2775		-35 (no SFBS)
HsdM	Rv2825c	A	full promoter
HsdM	Rv2969c		-10 motif
MamA	Rv3047c		-35 (no SFBS)
MamA	Rv3058c		-35 (no SFBS)
MamA	Rv3083	B	full promoter
HsdM	Rv3127	A	full promoter
MamA	Rv3202c	F	full promoter
MamA	Rv3208		-35 (no SFBS)
HsdM	Rv3284	A,I	full promoter
HsdM	Rv3312A	A	full promoter
HsdM	Rv3312c	A,I	full promoter
MamB	Rv3378c		-35 (no SFBS)
MamA	Rv3378c	A	full promoter
HsdM	Rv3481c		none
HsdM	Rv3484	A,I	full promoter
MamA	Rv3583c	A	full promoter
MamA	Rv3636		-35 (no SFBS)
MamB	Rv3683	A	full promoter
MamA	Rv3688c		-35 (no SFBS)
MamA	Rv3728	A	full promoter
HsdM	Rv3778c		none
MamA	Rv3779	B	-10 element
HsdM	Rv3780	A,I	full promoter
MamA	Rv3829c		-10 motif
MamA	Rv3844		-10 motif
HsdM	scoA		-10 motif
MamA	sigM		-10 motif
HsdM	TB15.3	I	full promoter
MamA	tcrY		-35 (no SFBS)
MamA	tgs1	A	-35 element
MamB	tgs3	I	full promoter
MamA	trpS		-10 motif
HsdM	truB	A	full promoter
MamA	vapB25		-10 motif
HsdM	vapB28	I	full promoter
HsdM	vapB28	A,I	full promoter
HsdM	vapB37		-10 motif
MamB	vapB46		-10 motif
MamA	whiB7	A	full promoter
MamB	yajC		-10 motif
