# Supplementary material for: Drivers and sites of diversity in the DNA adenine methylomes of 93 Mycobacterium tuberculosis complex clinical isolates
Source: eLife. 2020 Oct 27;9:e58542. doi: 10.7554/eLife.58542 (PMC7591249; doi:10.7554/eLife.58542)
Supplement: Supplementary file 7. [file elife-58542-supp7.xlsx]

## Sheet: HsdM-KO-DifExp-RNAseq-reanal
gene	locus_tag	description	strand	baseMean	log2FoldChange	lfcSE	stat	pvalue	padj (BH)	Differentially expressed	HsdM Promoter		Legend
gyrB	Rv0005	DNA gyrase (subunit B) GyrB (DNA topoisomerase (ATP-hydrolysing)) (DNA topoisomerase II) (type II DNA topoisomerase)	+	34732.1	-0.106077	0.1194	-0.888414	0.374318	0.690466	no	yes		Differentially expressed	Whether or not the gene was differentially expressed (padj (BH) < 0.05) between hsdM-WT & hsdM-KO
Rv0029	Rv0029	Conserved hypothetical protein	+	2722.35	0.237974	0.0818249	2.90834	0.00363357	0.0452864	yes	yes		HsdM Promoter	Whether or not the gene had an HsdM motif within its promoter (within 50 bp upstream of a TSS)
Rv0061c	Rv0061c	Hypothetical protein	-	3080.25	-0.205333	0.138831	-1.47902	0.139136	0.425457	no	yes		Columns F - K (baseMean - padj (BH))	Same to that reported in Supplemental Table 9 of https://www.nature.com/articles/s41467-019-11948-6
Rv0250c	Rv0250c	Conserved protein	-	8979.91	0.245532	0.207435	1.18366	0.236548	0.552272	no	yes
mazF1	Rv0456A	Possible toxin MazF1	-	190.134	0.0691636	0.180452	0.38328	0.701512	0.890345	no	yes
vapB28	Rv0608	Possible antitoxin VapB28	+	3586.94	-0.187942	0.150988	-1.24475	0.213225	0.526933	no	yes
purB	Rv0777	Probable adenylosuccinate lyase PurB (adenylosuccinase) (ASL) (ASASE)	+	5852.63	0.0317196	0.0684307	0.463529	0.642985	0.860698	no	yes
mshD	Rv0819	GCN5-related N-acetyltransferase, MshD	+	3618.8	-0.0507097	0.0797561	-0.63581	0.524901	0.799302	no	yes
Rv0826	Rv0826	Conserved hypothetical protein	+	15291.5	-0.21308	0.12079	-1.76405	0.0777235	0.308501	no	yes
Rv0863	Rv0863	Conserved hypothetical protein	+	4388.46	-0.133752	0.178681	-0.748552	0.454127	0.755535	no	yes
Rv0919	Rv0919	GCN5-related N-acetyltransferase	+	592.878	0.0918981	0.125987	0.729426	0.465741	0.763775	no	yes
glpX	Rv1099c	Fructose 1,6-bisphosphatase GlpX	-	7800.86	-0.213424	0.0703726	-3.03277	0.00242323	0.033682	yes	yes
Rv1219c	Rv1219c	Probable transcriptional regulatory protein	-	5445.5	0.32297	0.102752	3.14321	0.00167107	0.0258187	yes	yes
Rv1230c	Rv1230c	Possible membrane protein	-	7651.66	0.275754	0.113299	2.43386	0.014939	0.114126	no	yes
Rv1251c	Rv1251c	Conserved hypothetical protein	-	7391.81	0.261566	0.0836431	3.12717	0.00176497	0.0267941	yes	yes
lprD	Rv1343c	Probable conserved lipoprotein LprD	-	1892.21	-0.11662	0.106868	-1.09125	0.275162	0.5947	no	yes
mmpL12	Rv1522c	Probable conserved transmembrane transport protein MmpL12	-	11688.9	0.387453	0.0606031	6.39329	1.62e-10	2.02e-08	yes	yes
adh	Rv1530	Probable alcohol dehydrogenase Adh	+	781.788	0.169959	0.130675	1.30062	0.193389	0.500056	no	yes
Rv1813c	Rv1813c	Conserved hypothetical protein	-	761.844	-1.16154	0.133488	-8.70144	3.28e-18	9.42e-16	yes	yes
Rv1944c	Rv1944c	Conserved protein	-	1302.55	-0.220362	0.115121	-1.91418	0.0555971	0.256931	no	yes
lipT	Rv2045c	Carboxylesterase LipT	-	4321.62	0.0257306	0.0657529	0.391322	0.695559	0.887307	no	yes
pafA	Rv2097c	Proteasome accessory factor a PafA	-	14629.3	-0.0839892	0.121537	-0.691057	0.48953	0.780534	no	yes
clpX	Rv2457c	Probable ATP-dependent CLP protease ATP-binding subunit ClpX	-	47791.3	0.0112336	0.178681	0.0628695	0.94987	0.984584	no	yes
Rv2631	Rv2631	Conserved hypothetical protein	+	859.827	-0.0239872	0.13146	-0.182467	0.855216	0.960485	no	yes
Rv2733c	Rv2733c	Conserved hypothetical alanine, arginine-rich protein	-	7647.48	-0.197394	0.0764979	-2.58039	0.00986899	0.0878575	no	yes
pgsA3	Rv2746c	Probable PGP synthase PgsA3 (CDP-diacylglycerol--glycerol-3-phosphate 3- phosphatidyltransferase) (phosphatidylglycerophosphate synthase)	-	1562.37	0.0910741	0.0838271	1.08645	0.277279	0.59686	no	yes
argA	Rv2747	Probable L-glutamate alpha-N-acetyltranferase ArgA (alpha-N-acetylglutamate synthase)	+	758.841	0.461571	0.0899449	5.1317	2.87e-07	2.11e-05	yes	yes
truB	Rv2793c	Probable tRNA pseudouridine synthase B TruB (tRNA pseudouridine 55 synthase) (PSI55 synthase) (pseudouridylate synthase) (uracil hydrolyase)	-	2742.21	0.00435545	0.10055	0.0433163	0.965449	0.988299	no	yes
Rv2825c	Rv2825c	Conserved hypothetical protein	-	990.056	0.671422	0.0963598	6.96786	3.22e-12	6.68e-10	yes	yes
Rv2969c	Rv2969c	Possible conserved membrane or secreted protein	-	8545.13	-0.114253	0.108	-1.0579	0.290099	0.610057	no	yes
Rv3127	Rv3127	Conserved protein	+	1950.26	-0.506087	0.12851	-3.93812	8.21e-05	0.00253768	yes	yes
Rv3312c	Rv3312c	Conserved hypothetical protein	-	1596.12	0.727393	0.107909	6.74081	1.58e-11	2.56e-09	yes	yes
Rv3312A	Rv3312A	Secreted protein antigen	-	2018.8	0.0632674	0.108532	0.58294	0.559933	0.822549	no	yes
Rv3780	Rv3780	Conserved protein	+	5241.27	-0.0911684	0.0667847	-1.36511	0.172219	0.470362	no	yes
Rv3778c	Rv3778c	Possible aminotransferase	-	9428.25	-0.448031	0.0986967	-4.53948	5.64e-06	0.000284939	yes	yes
glf	Rv3809c	UDP-galactopyranose mutase Glf (UDP-GALP mutase) (NAD+-flavin adenine dinucleotide-requiring enzyme)	-	7944.2	-0.0801503	0.0864383	-0.927255	0.353794	0.675261	no	yes
glnA3	Rv1878	Probable glutamine synthetase GlnA3 (glutamine synthase) (GS-I)	+	1390.56	0.0881416	0.111076	0.793525	0.427472	0.731161	no	yes
Rv3481c	Rv3481c	Probable integral membrane protein	-	2513.31	-0.0815373	0.0659868	-1.23566	0.216585	0.531023	no	yes
Rv3484	Rv3484			11996	-0.0239245	0.0697059	-0.343221	0.731433	0.907206	no	yes
dnaA	Rv0001	Chromosomal replication initiator protein DnaA	+	22619.8	0.176429	0.155407	1.13527	0.256262	0.575382	no	no
dnaN	Rv0002	DNA polymerase III (beta chain) DnaN (DNA nucleotidyltransferase)	+	10996.8	0.0162091	0.101963	0.15897	0.873693	0.964322	no	no
recF	Rv0003	DNA replication and repair protein RecF (single-strand DNA binding protein)	+	6241.15	0.0760687	0.103589	0.73433	0.462748	0.762349	no	no
Rv0004	Rv0004	Conserved hypothetical protein	+	2256.51	0.0569511	0.076553	0.743944	0.45691	0.757936	no	no
gyrA	Rv0006	DNA gyrase (subunit A) GyrA (DNA topoisomerase (ATP-hydrolysing)) (DNA topoisomerase II) (type II DNA topoisomerase)	+	30577.3	-0.0622741	0.088347	-0.704881	0.480884	0.775345	no	no
Rv0007	Rv0007	Possible conserved membrane protein	+	5843.15	0.0636987	0.0918326	0.69364	0.487908	0.780389	no	no
Rv0008c	Rv0008c	Possible membrane protein	-	1350.29	-0.0499936	0.0834922	-0.598781	0.549319	0.816661	no	no
ppiA	Rv0009	Probable iron-regulated peptidyl-prolyl cis-trans isomerase A PpiA (PPIase A) (rotamase A)	+	18788.7	-0.230249	0.193456	-1.19019	0.233971	0.550547	no	no
Rv0010c	Rv0010c	Probable conserved membrane protein	-	1563.78	0.0657395	0.105853	0.621044	0.534571	0.804006	no	no
Rv0011c	Rv0011c	Probable conserved transmembrane protein	-	3288.16	-0.0506795	0.151569	-0.334365	0.738104	0.909626	no	no
Rv0012	Rv0012	Probable conserved membrane protein	+	3704.44	-0.0767726	0.0676548	-1.13477	0.256472	0.575382	no	no
trpG	Rv0013	Possible anthranilate synthase component II TrpG (glutamine amidotransferase)	+	4177.33	-0.0290943	0.0748119	-0.3889	0.69735	0.888379	no	no
pknB	Rv0014c	Transmembrane serine/threonine-protein kinase B PknB (protein kinase B) (STPK B)	-	15135.5	-0.0567312	0.115451	-0.491387	0.623153	0.85028	no	no
pknA	Rv0015c	Transmembrane serine/threonine-protein kinase A PknA (protein kinase A) (STPK A)	-	8139.59	0.0277936	0.0635199	0.437558	0.661707	0.870586	no	no
pbpA	Rv0016c	Probable penicillin-binding protein PbpA	-	10260.6	-0.0478755	0.0849598	-0.563508	0.573089	0.828608	no	no
rodA	Rv0017c	Probable cell division protein RodA	-	6491.46	0.0220704	0.123542	0.178647	0.858215	0.96065	no	no
pstP	Rv0018c	Phosphoserine/threonine phosphatase PstP	-	10869.5	-0.0246312	0.0839253	-0.29349	0.769148	0.919582	no	no
fhaB	Rv0019c	Conserved protein with FHA domain, FhaB	-	5807.74	-0.0567786	0.124659	-0.455471	0.64877	0.864643	no	no
fhaA	Rv0020c	Conserved protein with FHA domain, FhaA	-	32800.1	-0.141437	0.137759	-1.0267	0.304562	0.624355	no	no
Rv0021c	Rv0021c	Conserved hypothetical protein	-	1597.49	0.0295271	0.0900587	0.327866	0.743013	0.911459	no	no
whiB5	Rv0022c	Probable transcriptional regulatory protein WhiB-like WhiB5	-	102.136	0.237132	0.24734	0.95873	0.337695	0.662456	no	no
Rv0023	Rv0023	Possible transcriptional regulatory protein	+	1901.03	0.0959069	0.0762382	1.25799	0.208396	0.523214	no	no
Rv0024	Rv0024	Putative secreted protein P60-related protein	+	1979.14	0.158496	0.11699	1.35479	0.175484	0.474086	no	no
Rv0025	Rv0025	Conserved hypothetical protein	+	1227.79	0.212015	0.121868	1.73971	0.0819094	0.317693	no	no
Rv0026	Rv0026	Conserved hypothetical protein	+	3422.6	0.0515828	0.0881419	0.585224	0.558397	0.822285	no	no
Rv0027	Rv0027	Conserved hypothetical protein	+	1137.14	-0.0551066	0.115928	-0.475354	0.634535	0.855581	no	no
Rv0028	Rv0028	Conserved hypothetical protein	+	614.379	-0.127192	0.150406	-0.845663	0.397741	0.706631	no	no
Rv0030	Rv0030	Conserved hypothetical protein	+	1628.14	-0.124413	0.0751207	-1.65618	0.0976854	0.35086	no	no
bioF2	Rv0032	Possible 8-amino-7-oxononanoate synthase BioF2 (AONS) (8-amino-7-ketopelargonate synthase) (7-keto-8-amino-pelargonic acid synthetase) (7-KAP synthetase) (L-alanine--pimelyl CoA ligase)	+	3640.97	0.646765	0.0920387	7.02709	2.11e-12	4.64e-10	yes	no
acpA	Rv0033	Probable acyl carrier protein AcpA (ACP)	+	849.351	0.648725	0.0993177	6.53182	6.5e-11	9.72e-09	yes	no
Rv0034	Rv0034	Conserved hypothetical protein	+	514.283	0.544112	0.138341	3.93312	8.39e-05	0.00256983	yes	no
fadD34	Rv0035	Probable fatty-acid-CoA ligase FadD34 (fatty-acid-CoA synthetase) (fatty-acid-CoA synthase)	+	2033.58	0.468167	0.0876206	5.34312	9.14e-08	7.76e-06	yes	no
Rv0036c	Rv0036c	Conserved protein	-	4125.33	0.0727298	0.0613998	1.18453	0.236204	0.552272	no	no
Rv0037c	Rv0037c	Probable conserved integral membrane protein	-	2452.61	0.126113	0.095203	1.32468	0.185278	0.488685	no	no
Rv0038	Rv0038	Conserved protein	+	2777.05	0.107512	0.0870542	1.235	0.216832	0.531042	no	no
Rv0039c	Rv0039c	Possible conserved transmembrane protein	-	1085.74	0.158864	0.142154	1.11755	0.263761	0.583846	no	no
mtc28	Rv0040c	Secreted proline rich protein Mtc28 (proline rich 28 kDa antigen)	-	9826.62	-0.0307634	0.0987873	-0.311411	0.755488	0.915647	no	no
leuS	Rv0041	Probable leucyl-tRNA synthetase LeuS (leucine--tRNA ligase) (LEURS)	+	14308.4	-0.145238	0.0545663	-2.66168	0.00777516	0.0763026	no	no
Rv0042c	Rv0042c	Possible transcriptional regulatory protein (probably MarR-family)	-	2650.49	-0.182045	0.0733188	-2.48292	0.013031	0.106615	no	no
Rv0043c	Rv0043c	Probable transcriptional regulatory protein (probably GntR-family)	-	2246.94	-0.00532431	0.080218	-0.0663731	0.947081	0.984369	no	no
Rv0044c	Rv0044c	Possible oxidoreductase	-	1816.2	-0.0130438	0.0865253	-0.150751	0.880172	0.966782	no	no
Rv0045c	Rv0045c	Possible hydrolase	-	3380.71	0.275511	0.0915622	3.00901	0.00262102	0.0357035	yes	no
ino1	Rv0046c	myo-inositol-1-phosphate synthase Ino1 (inositol 1-phosphate synthetase) (D-glucose 6-phosphate cycloaldolase) (glucose 6-phosphate cyclase) (glucocycloaldolase)	-	13176.8	0.299801	0.140055	2.14059	0.0323067	0.188448	no	no
Rv0047c	Rv0047c	Conserved protein	-	5123.5	0.378678	0.0680007	5.56873	2.57e-08	2.34e-06	yes	no
Rv0048c	Rv0048c	Possible membrane protein	-	2184.88	-0.0721308	0.086098	-0.837775	0.402157	0.71041	no	no
Rv0049	Rv0049	Conserved hypothetical protein	+	4300.6	-0.0246452	0.12899	-0.191062	0.848477	0.957862	no	no
ponA1	Rv0050	Probable bifunctional penicillin-binding protein 1A/1B PonA1 (murein polymerase) (PBP1): penicillin-insensitive transglycosylase (peptidoglycan TGASE) + penicillin-sensitive transpeptidase (DD-transpeptidase)	+	15842.7	0.117735	0.0759751	1.54965	0.121227	0.394488	no	no
Rv0051	Rv0051	Probable conserved transmembrane protein	+	3170.03	0.146473	0.0899259	1.62881	0.103352	0.363786	no	no
Rv0052	Rv0052	Conserved protein	+	1160.74	-0.0680703	0.0967142	-0.70383	0.481539	0.775937	no	no
rpsF	Rv0053	30S ribosomal protein S6 RpsF	+	6689.06	-0.319298	0.158267	-2.01746	0.0436473	0.222037	no	no
ssb	Rv0054	Single-strand binding protein Ssb (helix-destabilizing protein)	+	9537.17	-0.377357	0.111416	-3.38692	0.00070682	0.0134837	yes	no
rpsR1	Rv0055	30S ribosomal protein S18-1 RpsR1	+	7243.16	-0.33944	0.162303	-2.09139	0.0364927	0.201545	no	no
rplI	Rv0056	50S ribosomal protein L9 RplI	+	11732.8	-0.339437	0.149671	-2.26789	0.0233361	0.151859	no	no
Rv0057	Rv0057	Hypothetical protein	+	6648.3	-0.186792	0.120409	-1.55132	0.120826	0.39387	no	no
dnaB	Rv0058	Probable replicative DNA helicase DnaB	+	42639.2	-0.0395567	0.125284	-0.315736	0.752203	0.914166	no	no
Rv0059	Rv0059	Hypothetical protein	+	4922.07	0.0404498	0.0836829	0.48337	0.628833	0.852504	no	no
Rv0060	Rv0060	Conserved hypothetical protein	+	13405.9	0.0741877	0.118245	0.627406	0.530393	0.801283	no	no
celA1	Rv0062	Possible cellulase CelA1 (endoglucanase) (endo-1,4-beta-glucanase) (FI-cmcase) (carboxymethyl cellulase)	+	3305.78	-0.29832	0.106642	-2.79739	0.00515176	0.0585484	no	no
Rv0063	Rv0063	Possible oxidoreductase	+	4314.16	-0.0247332	0.0782945	-0.3159	0.752079	0.914166	no	no
Rv0064	Rv0064	Probable conserved transmembrane protein	+	8401.05	0.090623	0.0688815	1.31564	0.188296	0.492486	no	no
vapB1	Rv0064A	Possible antitoxin VapB1	+	1007.77	0.127665	0.0861327	1.48219	0.138289	0.42507	no	no
vapC1	Rv0065	Possible toxin VapC1	+	2221.9	-0.0029836	0.0835788	-0.0356981	0.971523	0.98925	no	no
icd2	Rv0066c	Probable isocitrate dehydrogenase [NADP] Icd2 (oxalosuccinate decarboxylase) (IDH) (NADP+-specific ICDH) (IDP)	-	13696.9	-0.189667	0.0565398	-3.35457	0.000794883	0.014935	yes	no
Rv0067c	Rv0067c	Possible transcriptional regulatory protein (possibly TetR-family)	-	823.279	-0.108487	0.127349	-0.851886	0.394277	0.705698	no	no
Rv0068	Rv0068	Probable oxidoreductase	+	877.125	0.209311	0.157712	1.32717	0.184453	0.487905	no	no
sdaA	Rv0069c	Probable L-serine dehydratase SdaA (L-serine deaminase) (SDH) (L-SD)	-	3764.8	0.0919118	0.0692823	1.32663	0.184632	0.487905	no	no
glyA2	Rv0070c	Serine hydroxymethyltransferase GlyA2 (serine methylase 2) (SHMT 2)	-	2214.54	0.0846291	0.104047	0.813377	0.416002	0.721763	no	no
Rv0071	Rv0071	Possible maturase	+	251.065	0.222813	0.225932	0.986193	0.324038	0.646507	no	no
Rv0072	Rv0072	Probable glutamine-transport transmembrane protein ABC transporter	+	601.972	-0.0977188	0.201753	-0.484348	0.628139	0.85188	no	no
Rv0073	Rv0073	Probable glutamine-transport ATP-binding protein ABC transporter	+	1194.01	0.101157	0.148829	0.679684	0.496705	0.782754	no	no
Rv0074	Rv0074	Conserved protein	+	632.033	0.355099	0.189202	1.87683	0.0605419	0.270224	no	no
Rv0075	Rv0075	Probable aminotransferase	+	1181.7	0.0223092	0.0969069	0.230213	0.817927	0.945977	no	no
Rv0076c	Rv0076c	Probable membrane protein	-	1025.96	-0.020887	0.0841908	-0.248091	0.804064	0.939792	no	no
Rv0077c	Rv0077c	Probable oxidoreductase	-	624.475	-0.0254456	0.134018	-0.189868	0.849413	0.958056	no	no
Rv0078	Rv0078	Probable transcriptional regulatory protein	+	1887.92	0.121213	0.0968997	1.25091	0.210967	0.525619	no	no
Rv0078A	Rv0078A	Hypothetical protein	-	3703.16	-0.0158709	0.0733807	-0.216281	0.828768	0.949086	no	no
Rv0078B	Rv0078B	Conserved protein	-	2271.02	-0.00396705	0.162572	-0.0244018	0.980532	0.992477	no	no
Rv0079	Rv0079	Unknown protein	+	1146.61	-0.21062	0.160845	-1.30946	0.190379	0.495255	no	no
Rv0080	Rv0080	Conserved hypothetical protein	+	208.129	-1.24466	0.195176	-6.37711	1.8e-10	2.18e-08	yes	no
Rv0081	Rv0081	Probable transcriptional regulatory protein	+	308.331	1.74266	0.146209	11.919	9.43e-33	3.92e-30	yes	no
Rv0082	Rv0082	Probable oxidoreductase	+	896.962	1.68989	0.124475	13.5762	5.55e-42	6.91e-39	yes	no
Rv0083	Rv0083	Probable oxidoreductase	+	1104.65	1.83331	0.15361	11.9348	7.79e-33	3.64e-30	yes	no
hycD	Rv0084	Possible formate hydrogenlyase HycD (FHL)	+	947.971	1.66301	0.125589	13.2417	5.04e-40	4.71e-37	yes	no
hycP	Rv0085	Possible hydrogenase HycP	+	441.739	1.91628	0.136312	14.058	6.88e-45	1.29e-41	yes	no
hycQ	Rv0086	Possible hydrogenase HycQ	+	1185.7	1.55654	0.119575	13.0173	9.76e-39	7.3e-36	yes	no
hycE	Rv0087	Possible formate hydrogenase HycE (FHL)	+	1201.56	1.46959	0.118497	12.4019	2.55e-35	1.59e-32	yes	no
Rv0088	Rv0088	Possible polyketide cyclase/dehydrase	+	6138.53	0.434039	0.0675226	6.42805	1.29e-10	1.73e-08	yes	no
Rv0089	Rv0089	Possible methyltransferase/methylase	+	956.211	0.381939	0.107959	3.5378	0.00040347	0.00925505	yes	no
Rv0090	Rv0090	Possible membrane protein	+	364.679	0.206315	0.178866	1.15346	0.248722	0.568789	no	no
mtn	Rv0091	Probable bifunctional MTA/SAH nucleosidase Mtn: 5'-methylthioadenosine nucleosidase (methylthioadenosine methylthioribohydrolase) + S-adenosylhomocysteine nucleosidase (S-adenosyl-L-homocysteine homocysteinylribohydrolase)	+	2270.71	-0.343887	0.0728209	-4.72237	2.33e-06	0.00013009	yes	no
ctpA	Rv0092	Cation transporter P-type ATPase a CtpA	+	4350.93	-0.0244542	0.077043	-0.31741	0.750933	0.914166	no	no
Rv0093c	Rv0093c	Probable conserved membrane protein	-	1160.25	0.131628	0.145111	0.907087	0.364361	0.682537	no	no
Rv0097	Rv0097	Possible oxidoreductase	+	1657.08	0.118439	0.140052	0.84568	0.397731	0.706631	no	no
fcoT	Rv0098	Probable fatty acyl CoA thioesterase type III FcoT	+	628.791	0.0198149	0.145971	0.135746	0.892022	0.970618	no	no
fadD10	Rv0099	Possible fatty-acid-CoA ligase FadD10 (fatty-acid-CoA synthetase) (fatty-acid-CoA synthase)	+	1551.52	0.110736	0.128085	0.864547	0.387287	0.701491	no	no
Rv0100	Rv0100	Conserved hypothetical protein	+	393.512	0.142457	0.178018	0.800238	0.423573	0.728491	no	no
nrp	Rv0101	Probable peptide synthetase Nrp (peptide synthase)	+	4803.16	0.0281377	0.137515	0.204616	0.837872	0.952012	no	no
Rv0102	Rv0102	Probable conserved integral membrane protein	+	5087.56	-0.0341594	0.063126	-0.54113	0.588418	0.836852	no	no
ctpB	Rv0103c	Probable cation-transporter P-type ATPase B CtpB	-	8957.53	-0.0652764	0.057121	-1.14277	0.253132	0.572345	no	no
Rv0104	Rv0104	Conserved hypothetical protein	+	1033.07	0.439975	0.108317	4.06191	4.87e-05	0.00163951	yes	no
rpmB1	Rv0105c	50S ribosomal protein L28-1 RpmB1	-	41.1727	0.841424	0.323929	2.59756	0.00938898	0.0847956	no	no
Rv0106	Rv0106	Conserved hypothetical protein	+	1040.56	0.358601	0.121899	2.9418	0.00326314	0.0413595	yes	no
ctpI	Rv0107c	Probable cation-transporter ATPase I CtpI	-	12541.1	0.307773	0.0707749	4.34863	1.37e-05	0.000602607	yes	no
Rv0108c	Rv0108c	Hypothetical protein	-	7469.15	0.155904	0.347763	0.448306	0.653932	0.866546	no	no
Rv0110	Rv0110	Probable conserved integral membrane protein	+	1267.9	0.204815	0.134342	1.52458	0.127364	0.408767	no	no
Rv0111	Rv0111	Possible transmembrane acyltransferase	+	9672.49	0.157237	0.0594322	2.64566	0.00815316	0.078862	no	no
gca	Rv0112	Possible GDP-mannose 4,6-dehydratase Gca (GDP-D-mannose dehydratase)	+	2799.74	0.0556477	0.116809	0.476399	0.63379	0.855265	no	no
gmhA	Rv0113	Probable sedoheptulose-7-phosphate isomerase GmhA (phosphoheptose isomerase)	+	2186.52	0.0697091	0.0840005	0.829866	0.406614	0.714583	no	no
gmhB	Rv0114	Possible D-alpha,beta-D-heptose-1,7-biphosphate phosphatase GmhB (D-glycero-D-manno-heptose 7-phosphate kinase)	+	1252.81	0.166021	0.123752	1.34156	0.179738	0.482009	no	no
hddA	Rv0115	Possible D-alpha-D-heptose-7-phosphate kinase HddA	+	905.565	0.179324	0.148826	1.20493	0.228232	0.54166	no	no
ldtA	Rv0116c	Probable L,D-transpeptidase LdtA	-	2126.2	0.194461	0.0892277	2.17938	0.0293033	0.177577	no	no
oxyS	Rv0117	Oxidative stress response regulatory protein OxyS	+	988.127	0.106843	0.113844	0.938497	0.347989	0.67034	no	no
oxcA	Rv0118c	Probable oxalyl-CoA decarboxylase OxcA	-	2060.03	0.119621	0.134726	0.887884	0.374603	0.690652	no	no
fadD7	Rv0119	Probable fatty-acid-CoA ligase FadD7 (fatty-acid-CoA synthetase) (fatty-acid-CoA synthase)	+	2119.28	0.116078	0.114792	1.0112	0.31192	0.633348	no	no
fusA2	Rv0120c	Probable elongation factor G FusA2 (EF-G)	-	5110.58	0.332762	0.0607246	5.47987	4.26e-08	3.79e-06	yes	no
Rv0121c	Rv0121c	Conserved protein	-	706.042	0.0583218	0.115135	0.506551	0.61247	0.847257	no	no
Rv0122	Rv0122	Hypothetical protein	+	948.1	-0.0198575	0.0994383	-0.199696	0.841718	0.953192	no	no
Rv0123	Rv0123	Unknown protein	+	624.957	0.035184	0.1725	0.203965	0.838381	0.952012	no	no
pepA	Rv0125	Probable serine protease PepA (serine proteinase) (MTB32A)	+	7274.23	-0.0684598	0.115045	-0.595072	0.551795	0.817742	no	no
treS	Rv0126	Trehalose synthase TreS	+	9095.44	-0.000875557	0.059475	-0.0147214	0.988254	0.996721	no	no
mak	Rv0127	Maltokinase Mak	+	5002.61	0.108498	0.086049	1.26088	0.207352	0.521027	no	no
Rv0128	Rv0128	Probable conserved transmembrane protein	+	1991.65	-0.0495182	0.105877	-0.467695	0.640002	0.859544	no	no
fbpC	Rv0129c	Secreted antigen 85-C FbpC (85C) (antigen 85 complex C) (AG58C) (mycolyl transferase 85C) (fibronectin-binding protein C)	-	31177.1	-0.212316	0.162017	-1.31045	0.190043	0.495171	no	no
htdZ	Rv0130	Probable 3-hydroxyl-thioester dehydratase	+	1179.5	-0.188654	0.0924736	-2.04009	0.0413414	0.21619	no	no
fadE1	Rv0131c	Probable acyl-CoA dehydrogenase FadE1	-	2804.3	0.0184413	0.0880731	0.209386	0.834147	0.950547	no	no
fgd2	Rv0132c	Putative F420-dependent glucose-6-phosphate dehydrogenase Fgd2	-	621.763	0.0968451	0.127806	0.757754	0.448599	0.75182	no	no
Rv0133	Rv0133	GCN5-related N-acetyltransferase	+	2020.85	0.00635818	0.0812451	0.0782593	0.937622	0.980086	no	no
ephF	Rv0134	Possible epoxide hydrolase EphF (epoxide hydratase) (arene-oxide hydratase)	+	4716.45	0.00975689	0.0672916	0.144994	0.884716	0.967795	no	no
Rv0135c	Rv0135c	Possible transcriptional regulatory protein	-	3494.83	-0.0159397	0.113693	-0.140199	0.888502	0.968828	no	no
cyp138	Rv0136	Probable cytochrome P450 138 Cyp138	+	1998.23	0.177	0.0966458	1.83143	0.0670363	0.28465	no	no
msrA	Rv0137c	Probable peptide methionine sulfoxide reductase MsrA (protein-methionine-S-oxide reductase) (peptide met(O) reductase)	-	3017.45	-0.0709591	0.0865589	-0.819778	0.412343	0.719435	no	no
Rv0138	Rv0138	Conserved hypothetical protein	+	2094.48	0.00387237	0.0729806	0.0530602	0.957684	0.986557	no	no
Rv0139	Rv0139	Possible oxidoreductase	+	3151.86	0.0581513	0.0938906	0.619351	0.535685	0.804675	no	no
Rv0140	Rv0140	Conserved protein	+	2469.59	-0.160696	0.0752248	-2.13621	0.0326619	0.189269	no	no
Rv0141c	Rv0141c	Unknown protein	-	2801.8	0.123109	0.105304	1.16909	0.242369	0.559955	no	no
Rv0142	Rv0142	Conserved hypothetical protein	+	945.949	0.41601	0.143983	2.88931	0.00386092	0.0471765	yes	no
Rv0143c	Rv0143c	Probable conserved transmembrane protein	-	4004.73	-0.0245496	0.0706019	-0.347719	0.728051	0.905275	no	no
Rv0144	Rv0144	Probable transcriptional regulatory protein (possibly TetR-family)	+	7787.94	-0.0172405	0.14554	-0.118459	0.905704	0.972495	no	no
Rv0145	Rv0145	Possible S-adenosylmethionine-dependent methyltransferase	+	11266.8	-0.091554	0.101002	-0.906457	0.364694	0.68282	no	no
Rv0146	Rv0146	Possible S-adenosylmethionine-dependent methyltransferase	+	2477.16	0.011777	0.117723	0.10004	0.920313	0.975753	no	no
Rv0147	Rv0147	Probable aldehyde dehydrogenase (NAD+) dependent	+	10424.4	-0.0284279	0.0771122	-0.368656	0.712384	0.895028	no	no
Rv0148	Rv0148	Probable short-chain type dehydrogenase/reductase	+	11527	-0.0382569	0.133428	-0.286722	0.774325	0.923509	no	no
Rv0149	Rv0149	Possible quinone oxidoreductase (NADPH:quinone oxidoreductase) (zeta-crystallin)	+	5788.73	0.0684686	0.100566	0.680832	0.495978	0.782754	no	no
Rv0150c	Rv0150c	Conserved hypothetical protein	-	64.7766	-0.265685	0.366063	-0.725791	0.467967	0.765673	no	no
ptbB	Rv0153c	Phosphotyrosine protein phosphatase PTPB (protein-tyrosine-phosphatase) (PTPase)	-	3816.76	-0.0220445	0.0686745	-0.320999	0.748211	0.9141	no	no
fadE2	Rv0154c	Probable acyl-CoA dehydrogenase FadE2	-	6307.87	-0.122787	0.0680901	-1.8033	0.0713412	0.295398	no	no
pntAa	Rv0155	Probable NAD(P) transhydrogenase (subunit alpha) PntAa [first part; catalytic part] (pyridine nucleotide transhydrogenase subunit alpha) (nicotinamide nucleotide transhydrogenase subunit alpha)	+	6137.36	-0.248166	0.0611935	-4.05543	5e-05	0.00167059	yes	no
pntAb	Rv0156	Probable NAD(P) transhydrogenase (subunit alpha) PntAb [second part; integral membrane protein] (pyridine nucleotide transhydrogenase subunit alpha) (nicotinamide nucleotide transhydrogenase subunit alpha)	+	5135.63	-0.30743	0.127982	-2.40213	0.0162998	0.119033	no	no
pntB	Rv0157	Probable NAD(P) transhydrogenase (subunit beta) PntB [integral membrane protein] (pyridine nucleotide transhydrogenase subunit beta) (nicotinamide nucleotide transhydrogenase subunit beta)	+	15021.8	-0.261136	0.0971477	-2.68804	0.00718737	0.0725344	no	no
Rv0157A	Rv0157A	Conserved protein	-	1533.54	0.245803	0.196626	1.25011	0.21126	0.525619	no	no
Rv0158	Rv0158	Probable transcriptional regulatory protein (possibly TetR-family)	+	3095.01	-0.119529	0.0723437	-1.65224	0.098485	0.353305	no	no
Rv0161	Rv0161	Possible oxidoreductase	+	1519.5	-0.181135	0.130995	-1.38276	0.166738	0.464556	no	no
adhE1	Rv0162c	Probable zinc-type alcohol dehydrogenase (E subunit) AdhE1	-	670.114	0.0922694	0.134669	0.685157	0.493245	0.78179	no	no
Rv0163	Rv0163	Conserved protein	+	944.71	0.155022	0.104637	1.48152	0.138469	0.42507	no	no
TB18.5	Rv0164	Conserved protein TB18.5	+	7640.46	-0.121162	0.154449	-0.784478	0.43276	0.735495	no	no
mce1R	Rv0165c	Probable transcriptional regulatory protein Mce1R (probably GntR-family)	-	3563.92	0.220167	0.123649	1.78059	0.0749796	0.301775	no	no
fadD5	Rv0166	Probable fatty-acid-CoA ligase FadD5 (fatty-acid-CoA synthetase) (fatty-acid-CoA synthase)	+	23894.3	0.323381	0.14068	2.2987	0.0215221	0.14268	no	no
yrbE1A	Rv0167	Conserved integral membrane protein YrbE1A	+	14170.4	0.121031	0.140032	0.864307	0.387419	0.701491	no	no
yrbE1B	Rv0168	Conserved integral membrane protein YrbE1B	+	11499.3	0.0471247	0.127722	0.368965	0.712154	0.895028	no	no
mce1A	Rv0169	Mce-family protein Mce1A	+	32610.2	0.098796	0.156244	0.63232	0.527178	0.799302	no	no
mce1B	Rv0170	Mce-family protein Mce1B	+	22783	0.10547	0.129828	0.812382	0.416572	0.721763	no	no
mce1C	Rv0171	Mce-family protein Mce1C	+	37608.3	0.0349647	0.167211	0.209105	0.834366	0.950547	no	no
mce1D	Rv0172	Mce-family protein Mce1D	+	30181.3	0.107711	0.155015	0.694846	0.487152	0.780389	no	no
lprK	Rv0173	Possible Mce-family lipoprotein LprK (Mce-family lipoprotein Mce1E)	+	22678.2	0.027514	0.133608	0.20593	0.836845	0.951631	no	no
mce1F	Rv0174	Mce-family protein Mce1F	+	37182.6	0.0888439	0.17988	0.493906	0.621372	0.849763	no	no
Rv0175	Rv0175	Probable conserved Mce associated membrane protein	+	12463.2	-0.0244488	0.157795	-0.15494	0.876869	0.966002	no	no
Rv0176	Rv0176	Probable conserved Mce associated transmembrane protein	+	9285.99	-0.00483898	0.100967	-0.0479263	0.961775	0.987309	no	no
Rv0177	Rv0177	Probable conserved Mce associated protein	+	13398.8	-0.0952051	0.134833	-0.706095	0.480129	0.775131	no	no
Rv0178	Rv0178	Probable conserved Mce associated membrane protein	+	14402.8	-0.189701	0.126057	-1.50488	0.132356	0.416099	no	no
lprO	Rv0179c	Possible lipoprotein LprO	-	15207.4	-0.239969	0.11639	-2.06176	0.0392302	0.210145	no	no
Rv0180c	Rv0180c	Probable conserved transmembrane protein	-	5339.09	-0.139204	0.0695632	-2.00111	0.0453805	0.228061	no	no
Rv0181c	Rv0181c	Conserved hypothetical protein	-	2455.3	-0.0221782	0.0817123	-0.271419	0.786069	0.928923	no	no
sigG	Rv0182c	Probable alternative RNA polymerase sigma factor SigG (RNA polymerase ECF type sigma factor)	-	2953.04	-0.104419	0.075446	-1.38403	0.16635	0.464167	no	no
Rv0183	Rv0183	Possible lysophospholipase	+	5149.07	-0.0556729	0.0666064	-0.835849	0.40324	0.711857	no	no
Rv0184	Rv0184	Conserved hypothetical protein	+	5180.49	-0.0317831	0.0621738	-0.511197	0.609213	0.845526	no	no
Rv0185	Rv0185	Conserved hypothetical protein	+	2827.62	0.0477434	0.0827114	0.577229	0.563785	0.82467	no	no
bglS	Rv0186	Probable beta-glucosidase BglS (gentiobiase) (cellobiase) (beta-D-glucoside glucohydrolase)	+	6318.93	0.0977889	0.0687586	1.42221	0.154967	0.446051	no	no
mymT	Rv0186A	Metallothionein, MymT	-	1579.62	-0.268856	0.164043	-1.63893	0.101227	0.359155	no	no
Rv0187	Rv0187	Probable O-methyltransferase	+	1933.91	0.0199345	0.0950993	0.209618	0.833966	0.950547	no	no
Rv0188	Rv0188	Probable conserved transmembrane protein	+	3499.89	0.054606	0.0975343	0.559865	0.575571	0.830591	no	no
ilvD	Rv0189c	Probable dihydroxy-acid dehydratase IlvD (dad)	-	8181.79	-0.0547274	0.0656712	-0.833354	0.404645	0.712656	no	no
Rv0190	Rv0190	Conserved protein	+	3085.33	-0.267269	0.127286	-2.09976	0.0357502	0.198324	no	no
Rv0191	Rv0191	Probable conserved integral membrane protein	+	2144.41	0.0114604	0.102418	0.111898	0.910904	0.973607	no	no
Rv0192	Rv0192	Conserved hypothetical protein	+	6645.82	-0.0083615	0.0617111	-0.135494	0.892221	0.970618	no	no
Rv0192A	Rv0192A	Conserved secreted protein	+	1420.1	-0.0188737	0.103563	-0.182244	0.855392	0.960485	no	no
Rv0193c	Rv0193c	Hypothetical protein	-	804.909	0.210863	0.109617	1.92363	0.0544005	0.254255	no	no
Rv0194	Rv0194	Probable transmembrane multidrug efflux pump	+	624.473	0.113762	0.20729	0.548804	0.58314	0.834748	no	no
Rv0195	Rv0195	Possible two component transcriptional regulatory protein (probably LuxR-family)	+	81.7883	0.139449	0.231941	0.601228	0.547688	0.814561	no	no
Rv0196	Rv0196	Possible transcriptional regulatory protein	+	355.136	-0.100609	0.202428	-0.497011	0.619181	0.849763	no	no
Rv0197	Rv0197	Possible oxidoreductase	+	2624.27	0.0298804	0.104832	0.285031	0.775621	0.92391	no	no
zmp1	Rv0198c	Probable zinc metalloprotease Zmp1	-	18449.4	-0.150632	0.0907992	-1.65896	0.0971244	0.350523	no	no
Rv0199	Rv0199	Probable conserved membrane protein	+	2583.07	-0.0704984	0.0857795	-0.821856	0.411159	0.718952	no	no
Rv0200	Rv0200	Possible conserved transmembrane protein	+	3555.21	-0.0506185	0.0798576	-0.63386	0.526172	0.799302	no	no
Rv0201c	Rv0201c	Conserved protein	-	3261.98	-0.0811394	0.0654457	-1.2398	0.21505	0.52942	no	no
mmpL11	Rv0202c	Probable conserved transmembrane transport protein MmpL11	-	13008.7	-0.032975	0.0572506	-0.575976	0.564631	0.82467	no	no
Rv0203	Rv0203	Possible exported protein	+	3470.37	-0.175887	0.0915732	-1.92073	0.0547661	0.25469	no	no
Rv0204c	Rv0204c	Probable conserved transmembrane protein	-	3857.9	-0.0493277	0.0612186	-0.805763	0.42038	0.725669	no	no
Rv0205	Rv0205	Probable conserved transmembrane protein	+	1934.76	-0.0132271	0.081525	-0.162246	0.871112	0.962781	no	no
mmpL3	Rv0206c	Possible conserved transmembrane transport protein MmpL3	-	28689.3	-0.0804237	0.0946739	-0.849482	0.395613	0.706098	no	no
Rv0207c	Rv0207c	Conserved hypothetical protein	-	6924.2	0.0128543	0.0916672	0.140228	0.88848	0.968828	no	no
Rv0208c	Rv0208c	Hypothetical methlytransferase (methylase)	-	4809.62	0.00829382	0.0784609	0.105706	0.915815	0.974348	no	no
Rv0209	Rv0209	Hypothetical protein	+	930.117	0.0844354	0.121292	0.696131	0.486347	0.780389	no	no
Rv0210	Rv0210	Hypothetical protein	+	1264.12	0.0651703	0.173943	0.374664	0.707911	0.892707	no	no
pckA	Rv0211	Probable iron-regulated phosphoenolpyruvate carboxykinase [GTP] PckA (phosphoenolpyruvate carboxylase) (PEPCK)(pep carboxykinase)	+	18253.6	-0.210192	0.0859443	-2.44568	0.0144579	0.111921	no	no
nadR	Rv0212c	Possible transcriptional regulatory protein NadR (probably AsnC-family)	-	1438.06	0.0438219	0.105975	0.413514	0.67923	0.880077	no	no
Rv0213c	Rv0213c	Possible methyltransferase (methylase)	-	1844.87	0.0134453	0.102404	0.131296	0.895541	0.972071	no	no
fadD4	Rv0214	Probable fatty-acid-CoA ligase FadD4 (fatty-acid-CoA synthetase) (fatty-acid-CoA synthase)	+	2623.28	-0.135848	0.121486	-1.11822	0.263474	0.583846	no	no
fadE3	Rv0215c	Probable acyl-CoA dehydrogenase FadE3	-	2060.55	0.0620641	0.0689061	0.900705	0.367745	0.684119	no	no
Rv0216	Rv0216	Double hotdog hydratase	+	1185.75	0.289121	0.127117	2.27445	0.0229387	0.15047	no	no
lipW	Rv0217c	Possible esterase LipW	-	1242.38	-0.0153928	0.107369	-0.143363	0.886003	0.967795	no	no
Rv0218	Rv0218	Probable conserved transmembrane protein	+	573.011	0.251136	0.119361	2.104	0.0353785	0.197517	no	no
Rv0219	Rv0219	Probable conserved transmembrane protein	+	313.838	0.356636	0.131115	2.72002	0.00652785	0.0685608	no	no
lipC	Rv0220	Probable esterase LipC	+	18770.3	0.0259666	0.147683	0.175827	0.86043	0.96065	no	no
Rv0221	Rv0221	Possible triacylglycerol synthase (diacylglycerol acyltransferase)	+	7368.41	0.108735	0.0728772	1.49203	0.135693	0.421391	no	no
echA1	Rv0222	Probable enoyl-CoA hydratase EchA1 (enoyl hydrase) (unsaturated acyl-CoA hydratase) (crotonase)	+	3176.47	0.166092	0.0751381	2.2105	0.0270707	0.168415	no	no
Rv0223c	Rv0223c	Probable aldehyde dehydrogenase	-	2770.98	0.180198	0.099046	1.81934	0.0688596	0.289613	no	no
Rv0224c	Rv0224c	Possible methyltransferase (methylase)	-	858.562	0.24537	0.114372	2.14538	0.0319227	0.187319	no	no
Rv0225	Rv0225	Possible conserved protein	+	4517.21	-0.094913	0.0690283	-1.37499	0.169136	0.468096	no	no
Rv0226c	Rv0226c	Probable conserved transmembrane protein	-	2324.3	0.103749	0.0973205	1.06606	0.286398	0.605338	no	no
Rv0227c	Rv0227c	Probable conserved membrane protein	-	19011.2	-0.125426	0.115954	-1.08169	0.279389	0.598872	no	no
Rv0228	Rv0228	Probable integral membrane acyltransferase	+	968.277	0.0681173	0.126115	0.540122	0.589113	0.837179	no	no
Rv0229c	Rv0229c	Possible conserved membrane protein with PIN domain	-	4438.74	0.00460863	0.109884	0.0419407	0.966546	0.988299	no	no
php	Rv0230c	Probable phosphotriesterase Php (parathion hydrolase) (PTE) (aryldialkylphosphatase) (paraoxonase) (a-esterase) (aryltriphosphatase) (paraoxon hydrolase)	-	5212.89	0.049855	0.0758886	0.656949	0.511214	0.791777	no	no
fadE4	Rv0231	Probable acyl-CoA dehydrogenase FadE4	+	8103.32	0.122706	0.0933072	1.31507	0.188486	0.492486	no	no
Rv0232	Rv0232	Probable transcriptional regulatory protein (probably TetR/AcrR-family)	+	7378.84	0.0635878	0.122465	0.519233	0.603599	0.842541	no	no
nrdB	Rv0233	Ribonucleoside-diphosphate reductase (beta chain) NrdB (ribonucleotide reductase small chain)	+	12601.7	0.0598377	0.105717	0.566016	0.571383	0.8277	no	no
gabD1	Rv0234c	Succinate-semialdehyde dehydrogenase [NADP+] dependent (SSDH) GabD1	-	5422.16	-0.0886085	0.0683981	-1.29548	0.195154	0.503575	no	no
Rv0235c	Rv0235c	Probable conserved transmembrane protein	-	1002.31	0.0809777	0.125413	0.645686	0.518483	0.79647	no	no
aftD	Rv0236c	Possible arabinofuranosyltransferase AftD	-	6897.81	0.119299	0.0865614	1.3782	0.168141	0.467117	no	no
Rv0236A	Rv0236A	Small secreted protein	-	3185.09	-0.114043	0.230209	-0.495387	0.620327	0.849763	no	no
lpqI	Rv0237	Probable conserved lipoprotein LpqI	+	5429.05	-0.188442	0.0788632	-2.38948	0.0168721	0.120621	no	no
Rv0238	Rv0238	Possible transcriptional regulatory protein (probably TetR-family)	+	6469.54	-0.0151121	0.125947	-0.119987	0.904493	0.972495	no	no
vapB24	Rv0239	Possible antitoxin VapB24	+	3878.93	-0.0932418	0.135883	-0.686192	0.492592	0.78179	no	no
vapC24	Rv0240	Possible toxin VapC24. Contains PIN domain.	+	997.177	-0.0799905	0.112611	-0.710325	0.477503	0.771891	no	no
htdX	Rv0241c	Probable 3-hydroxyacyl-thioester dehydratase HtdX	-	4914.2	0.32151	0.0786181	4.08952	4.32e-05	0.00149652	yes	no
fabG4	Rv0242c	Probable 3-oxoacyl-[acyl-carrier protein] reductase FabG4 (3-ketoacyl-acyl carrier protein reductase)	-	5751.55	0.409205	0.0767925	5.32871	9.89e-08	8.22e-06	yes	no
fadA2	Rv0243	Probable acetyl-CoA acyltransferase FadA2 (3-ketoacyl-CoA thiolase) (beta-ketothiolase)	+	11455.5	0.227852	0.115442	1.97374	0.048411	0.238082	no	no
fadE5	Rv0244c	Probable acyl-CoA dehydrogenase FadE5	-	1796.69	-0.288116	0.11675	-2.4678	0.0135946	0.10838	no	no
Rv0245	Rv0245	Possible oxidoreductase	+	1985.43	0.106846	0.0952462	1.12178	0.261955	0.581567	no	no
Rv0246	Rv0246	Probable conserved integral membrane protein	+	1023.81	0.21546	0.11908	1.80937	0.0703934	0.293423	no	no
sdhB2	Rv0247c	Probable succinate dehydrogenase [iron-sulfur subunit] (succinic dehydrogenase)	-	13499.3	-0.14547	0.1327	-1.09623	0.272977	0.593228	no	no
sdhA2	Rv0248c	Probable succinate dehydrogenase [iron-sulfur subunit] (succinic dehydrogenase)	-	20673.6	-0.122102	0.0833712	-1.46456	0.143041	0.432334	no	no
sdhD2	Rv0249c	Probable succinate dehydrogenase [membrane anchor subunit] (succinic dehydrogenase)	-	9814.8	-0.00164954	0.139256	-0.0118454	0.990549	0.997485	no	no
hsp	Rv0251c	Heat shock protein Hsp (heat-stress-induced ribosome-binding protein A)	-	1140.91	0.09653	0.0827165	1.167	0.243211	0.559955	no	no
nirB	Rv0252	Probable nitrite reductase [NAD(P)H] large subunit [FAD flavoprotein] NirB	+	1693.95	0.00496493	0.146948	0.0337869	0.973047	0.989782	no	no
nirD	Rv0253	Probable nitrite reductase [NAD(P)H] small subunit NirD	+	223.612	-0.122381	0.180699	-0.677266	0.498237	0.783393	no	no
cobU	Rv0254c	Probable bifunctional cobalamin biosynthesis protein CobU: cobinamide kinase + cobinamide phosphate guanylyltransferase	-	656.026	-0.0304898	0.132449	-0.230201	0.817936	0.945977	no	no
cobQ1	Rv0255c	Probable cobyric acid synthase CobQ1	-	2002.15	0.227083	0.107198	2.11836	0.0341446	0.193948	no	no
Rv0257	Rv0257	Conserved hypothetical protein	+	242.599	0.108453	0.149702	0.724459	0.468784	0.765742	no	no
Rv0258c	Rv0258c	Conserved hypothetical protein	-	658.424	0.272605	0.111288	2.44954	0.0143038	0.111189	no	no
Rv0259c	Rv0259c	Conserved hypothetical protein	-	214.419	-0.0332518	0.255332	-0.13023	0.896385	0.972318	no	no
Rv0260c	Rv0260c	Possible transcriptional regulatory protein	-	117.237	0.157539	0.271275	0.580734	0.561419	0.823518	no	no
narK3	Rv0261c	Probable integral membrane nitrite extrusion protein NarK3 (nitrite facilitator)	-	185.25	0.149922	0.217257	0.690068	0.490152	0.780859	no	no
aac	Rv0262c	Aminoglycoside 2'-N-acetyltransferase Aac (Aac(2')-IC)	-	1853.78	0.0308621	0.0770943	0.400316	0.688924	0.884037	no	no
Rv0263c	Rv0263c	Conserved hypothetical protein	-	2163.37	0.0128944	0.101329	0.127253	0.89874	0.972335	no	no
Rv0264c	Rv0264c	Conserved hypothetical protein	-	1167.97	0.286794	0.145566	1.97019	0.0488161	0.238281	no	no
Rv0265c	Rv0265c	Probable periplasmic iron-transport lipoprotein	-	3009.39	-0.0994715	0.073396	-1.35527	0.175331	0.474086	no	no
oplA	Rv0266c	Probable 5-oxoprolinase OplA (5-oxo-L-prolinase) (pyroglutamase) (5-OPASE)	-	4226.19	-0.0090229	0.0956663	-0.0943164	0.924858	0.976573	no	no
narU	Rv0267	Probable integral membrane nitrite extrusion protein NarU (nitrite facilitator)	+	166.645	0.228171	0.18162	1.25631	0.209004	0.523685	no	no
Rv0268c	Rv0268c	Hypothetical protein	-	3930.36	0.186277	0.116248	1.60241	0.109064	0.373898	no	no
Rv0269c	Rv0269c	Conserved hypothetical protein	-	1564.69	0.0418153	0.0881173	0.474541	0.635114	0.855747	no	no
fadD2	Rv0270	Probable fatty-acid-CoA ligase FadD2 (fatty-acid-CoA synthetase) (fatty-acid-CoA synthase)	+	15555.7	0.0243074	0.0887071	0.274019	0.78407	0.928027	no	no
fadE6	Rv0271c	Probable acyl-CoA dehydrogenase FadE6	-	11756.5	0.160096	0.0609773	2.6255	0.00865207	0.0817179	no	no
Rv0272c	Rv0272c	Unknown protein	-	4186.46	0.24883	0.0720948	3.45143	0.000557635	0.011648	yes	no
Rv0273c	Rv0273c	Possible transcriptional regulatory protein	-	2742.18	0.295779	0.070816	4.17672	2.96e-05	0.00111694	yes	no
Rv0274	Rv0274	Conserved protein	+	1868.85	0.283375	0.112028	2.52949	0.0114227	0.0979574	no	no
Rv0275c	Rv0275c	Possible transcriptional regulatory protein (possibly TetR-family)	-	4600.8	0.112509	0.129924	0.865959	0.386513	0.701199	no	no
Rv0276	Rv0276	Conserved hypothetical protein	+	12676.4	0.314271	0.175174	1.79405	0.0728052	0.297832	no	no
vapC25	Rv0277c	Possible toxin VapC25. Contains PIN domain.	-	3139.78	-0.243537	0.099781	-2.44072	0.0146581	0.11277	no	no
vapB25	Rv0277A	Possible antitoxin VapB25	-	5525.11	-0.0538928	0.191802	-0.280982	0.778724	0.925077	no	no
Rv0281	Rv0281	Possible S-adenosylmethionine-dependent methyltransferase	+	7180.66	0.00266831	0.0897775	0.0297213	0.976289	0.991104	no	no
eccA3	Rv0282	ESX conserved component EccA3. ESX-3 type VII secretion system protein.	+	27119.2	-0.0301493	0.136494	-0.220883	0.825183	0.947456	no	no
eccB3	Rv0283	ESX conserved component EccB3. ESX-3 type VII secretion system protein. Possible membrane protein.	+	12067.3	0.0734382	0.0787542	0.932499	0.351079	0.671793	no	no
eccC3	Rv0284	ESX conserved component EccC3. ESX-3 type VII secretion system protein. Possible membrane protein.	+	37343.7	0.0533745	0.0970878	0.549755	0.582487	0.834424	no	no
esxG	Rv0287	ESAT-6 like protein EsxG (conserved protein TB9.8)	+	11711.1	0.0959642	0.182075	0.52706	0.598152	0.840941	no	no
esxH	Rv0288	Low molecular weight protein antigen 7 EsxH (10 kDa antigen) (CFP-7) (protein TB10.4)	+	13546	-0.0398087	0.187461	-0.212357	0.831828	0.949642	no	no
espG3	Rv0289	ESX-3 secretion-associated protein EspG3	+	11722.5	0.205407	0.14119	1.45483	0.145716	0.434824	no	no
eccD3	Rv0290	ESX conserved component EccD3. ESX-3 type VII secretion system protein. Probable transmembrane protein.	+	5371.41	0.311722	0.126792	2.45854	0.0139505	0.109952	no	no
mycP3	Rv0291	Probable membrane-anchored mycosin MycP3 (serine protease) (subtilisin-like protease) (subtilase-like) (mycosin-3)	+	9022.25	0.255028	0.104867	2.43192	0.0150189	0.114126	no	no
eccE3	Rv0292	ESX conserved component EccE3. ESX-3 type VII secretion system protein. Probable transmembrane protein.	+	4922.14	0.24842	0.0793817	3.12944	0.00175141	0.0267941	yes	no
Rv0293c	Rv0293c	Conserved protein	-	4087.16	0.143706	0.0907903	1.58283	0.11346	0.3815	no	no
tam	Rv0294	Probable trans-aconitate methyltransferase Tam	+	450.358	0.326749	0.136537	2.39312	0.0167058	0.120195	no	no
Rv0295c	Rv0295c	Conserved protein	-	4411.57	-0.0812986	0.0804476	-1.01058	0.312219	0.633348	no	no
Rv0296c	Rv0296c	Probable sulfatase	-	7030.63	-0.127721	0.0824011	-1.54999	0.121143	0.394488	no	no
Rv0298	Rv0298	Hypothetical protein	+	4603.39	-0.105934	0.163174	-0.64921	0.516203	0.795022	no	no
Rv0299	Rv0299	Hypothetical protein	+	5530.1	-0.175609	0.122453	-1.43409	0.151546	0.442681	no	no
vapB2	Rv0300	Possible antitoxin VapB2	+	3623.16	-0.183983	0.110995	-1.65757	0.0974039	0.350523	no	no
vapC2	Rv0301	Possible toxin VapC2	+	4699.39	-0.263345	0.0842435	-3.126	0.00177201	0.0267941	yes	no
Rv0302	Rv0302	Probable transcriptional regulatory protein (probably TetR/AcrR-family)	+	2834.49	0.0337258	0.0864383	0.390172	0.696409	0.887631	no	no
Rv0303	Rv0303	Probable dehydrogenase/reductase	+	1567.67	0.0560616	0.0999406	0.560949	0.574832	0.830165	no	no
Rv0306	Rv0306	Putative oxidoreductase	+	595.41	0.38108	0.124669	3.05673	0.00223765	0.0318121	yes	no
Rv0307c	Rv0307c	Unknown protein	-	534.899	-0.0585029	0.119199	-0.490799	0.623568	0.85028	no	no
Rv0308	Rv0308	Probable conserved integral membrane protein	+	5821.9	-0.195912	0.109173	-1.79452	0.0727308	0.297832	no	no
Rv0309	Rv0309	Possible conserved exported protein	+	15507.2	-0.110868	0.156041	-0.710508	0.477389	0.771891	no	no
Rv0310c	Rv0310c	Conserved protein	-	1196.75	-0.213723	0.102057	-2.09414	0.0362473	0.200783	no	no
Rv0311	Rv0311	Unknown protein	+	979.428	0.218761	0.134096	1.63137	0.102812	0.362656	no	no
Rv0312	Rv0312	Conserved hypothetical proline and threonine rich protein	+	12008.4	-0.0942833	0.0968703	-0.973294	0.330407	0.654339	no	no
Rv0313	Rv0313	Conserved protein	+	6431.38	-0.0351747	0.120504	-0.291896	0.770366	0.919961	no	no
Rv0314c	Rv0314c	Possible conserved membrane protein	-	5563.61	0.0870647	0.0953036	0.913551	0.360953	0.6799	no	no
Rv0315	Rv0315	Possible beta-1,3-glucanase precursor	+	16789.9	-0.105968	0.137066	-0.773113	0.439456	0.741482	no	no
Rv0316	Rv0316	Possible muconolactone isomerase	+	3764.4	-0.0939642	0.0664302	-1.41448	0.157221	0.447715	no	no
glpQ2	Rv0317c	Possible glycerophosphoryl diester phosphodiesterase GlpQ2 (glycerophosphodiester phosphodiesterase)	-	2830.17	0.0243479	0.0890895	0.273297	0.784625	0.928096	no	no
Rv0318c	Rv0318c	Probable conserved integral membrane protein	-	642.673	0.203783	0.139517	1.46063	0.144116	0.433363	no	no
pcp	Rv0319	Probable pyrrolidone-carboxylate peptidase Pcp (5-oxoprolyl-peptidase) (pyroglutamyl-peptidase I) (PGP-I) (pyrase)	+	634.981	0.167422	0.156328	1.07097	0.284185	0.603775	no	no
Rv0320	Rv0320	Possible conserved exported protein	+	441.576	0.355377	0.167512	2.12151	0.0338793	0.193396	no	no
dcd	Rv0321	Probable deoxycytidine triphosphate deaminase Dcd (dCTP deaminase)	+	2069.77	-0.162892	0.0868802	-1.8749	0.0608064	0.270902	no	no
udgA	Rv0322	Probable UDP-glucose 6-dehydrogenase UdgA (UDP-GLC dehydrogenase) (UDP-GLCDH) (UDPGDH)	+	782.154	-0.0605371	0.116444	-0.51988	0.603148	0.842541	no	no
Rv0323c	Rv0323c	Conserved hypothetical protein	-	526.293	0.0118189	0.136917	0.0863214	0.931211	0.978858	no	no
Rv0324	Rv0324	Possible transcriptional regulatory protein (possibly ArsR-family)	+	672.922	0.0492344	0.145487	0.338411	0.735054	0.908851	no	no
Rv0325	Rv0325	Hypothetical protein	+	291.483	0.11076	0.144414	0.766958	0.443106	0.745288	no	no
Rv0326	Rv0326	Hypothetical protein	+	299.23	0.240649	0.165107	1.45753	0.14497	0.43398	no	no
cyp135A1	Rv0327c	Possible cytochrome P450 135A1 Cyp135A1	-	567.902	0.0664105	0.155779	0.426313	0.66988	0.874679	no	no
Rv0328	Rv0328	Possible transcriptional regulatory protein (possibly TetR/AcrR-family)	+	775.944	0.0814062	0.123676	0.658219	0.510397	0.791776	no	no
Rv0329c	Rv0329c	Conserved hypothetical protein	-	314.887	0.0695186	0.218161	0.318657	0.749986	0.914166	no	no
Rv0330c	Rv0330c	Hypothetical protein	-	317.732	0.071809	0.177899	0.40365	0.68647	0.883246	no	no
Rv0331	Rv0331	Possible dehydrogenase/reductase	+	1059.23	0.192858	0.130253	1.48064	0.138703	0.425089	no	no
Rv0332	Rv0332	Conserved protein	+	2434.74	0.207669	0.0897114	2.31486	0.0206208	0.138422	no	no
Rv0333	Rv0333	Unknown protein	+	2394.27	0.0899164	0.0735496	1.22253	0.221509	0.534972	no	no
rmlA	Rv0334	Alpha-D-glucose-1-phosphate thymidylyltransferase RmlA (dTDP-glucose synthase) (dTDP-glucose pyrophosphorylase)	+	3166.76	0.057386	0.068484	0.837948	0.40206	0.71041	no	no
aspC	Rv0337c	Probable aspartate aminotransferase AspC (transaminase A) (ASPAT)	-	13226.6	-0.227494	0.0874844	-2.60039	0.0093117	0.0843013	no	no
Rv0338c	Rv0338c	Probable iron-sulfur-binding reductase	-	32119.3	-0.199944	0.103114	-1.93905	0.0524954	0.250126	no	no
Rv0339c	Rv0339c	Possible transcriptional regulatory protein	-	3639.78	-0.0574243	0.111288	-0.515997	0.605857	0.844256	no	no
Rv0340	Rv0340	Conserved protein	+	1349.59	-0.0212611	0.119389	-0.178083	0.858658	0.96065	no	no
iniB	Rv0341	Isoniazid inductible gene protein IniB	+	4215.52	0.341796	0.0955276	3.57798	0.000346263	0.00820564	yes	no
iniA	Rv0342	Isoniazid inductible gene protein IniA	+	5948.84	0.140599	0.0800512	1.75636	0.0790262	0.311803	no	no
iniC	Rv0343	Isoniazid inductible gene protein IniC	+	2924.16	0.0107952	0.085115	0.126831	0.899074	0.972415	no	no
lpqJ	Rv0344c	Probable lipoprotein LpqJ	-	2176.22	0.156579	0.0807158	1.93987	0.0523951	0.250126	no	no
Rv0345	Rv0345	Conserved hypothetical protein	+	669.075	0.18978	0.109811	1.72824	0.0839452	0.32126	no	no
ansP2	Rv0346c	Possible L-asparagine permease AnsP2 (L-asparagine transport protein)	-	15513.8	-0.171049	0.146851	-1.16478	0.244108	0.561328	no	no
Rv0347	Rv0347	Probable conserved membrane protein	+	4251.74	-0.130378	0.0712801	-1.82909	0.0673855	0.284751	no	no
Rv0348	Rv0348	Possible transcriptional regulatory protein	+	3318.41	-0.154681	0.088845	-1.74102	0.0816796	0.317464	no	no
Rv0349	Rv0349	Hypothetical protein	+	2864.92	-0.0466924	0.0732439	-0.637492	0.523805	0.798792	no	no
dnaK	Rv0350	Probable chaperone protein DnaK (heat shock protein 70) (heat shock 70 kDa protein) (HSP70)	+	57249.1	-0.163055	0.146069	-1.11629	0.264298	0.584395	no	no
dnaJ1	Rv0352	Probable chaperone protein DnaJ1	+	15969.6	-0.0612618	0.0933981	-0.655921	0.511875	0.791849	no	no
hspR	Rv0353	Probable heat shock protein transcriptional repressor HspR (MerR family)	+	5270	0.0121289	0.152538	0.0795139	0.936624	0.980086	no	no
Rv0356c	Rv0356c	Conserved protein	-	3058.7	-0.0344643	0.0645295	-0.534086	0.593282	0.838037	no	no
purA	Rv0357c	Probable adenylosuccinate synthetase PurA (imp--aspartate ligase) (ADSS) (ampsase)	-	4712.79	-0.115047	0.0765737	-1.50244	0.132985	0.41644	no	no
Rv0358	Rv0358	Conserved protein	+	578.317	0.00615358	0.148391	0.0414687	0.966922	0.988299	no	no
Rv0359	Rv0359	Probable conserved integral membrane protein	+	864.482	0.039087	0.120292	0.324935	0.745231	0.912981	no	no
Rv0360c	Rv0360c	Conserved protein	-	1661.81	0.0541734	0.106873	0.506895	0.612228	0.847257	no	no
Rv0361	Rv0361	Probable conserved membrane protein	+	5387.1	0.0374615	0.0835859	0.44818	0.654024	0.866546	no	no
mgtE	Rv0362	Possible Mg2+ transport transmembrane protein MgtE	+	919.612	-0.0652586	0.172351	-0.378638	0.704957	0.891689	no	no
fba	Rv0363c	Probable fructose-bisphosphate aldolase Fba	-	10051	-0.113999	0.0811859	-1.40417	0.160269	0.453974	no	no
Rv0364	Rv0364	Possible conserved transmembrane protein	+	5741.76	-0.0647211	0.115862	-0.558604	0.576432	0.830625	no	no
Rv0365c	Rv0365c	Conserved protein	-	2120.47	0.117755	0.107108	1.0994	0.271592	0.591595	no	no
Rv0366c	Rv0366c	Conserved hypothetical protein	-	963.067	0.102966	0.121555	0.84708	0.39695	0.706424	no	no
Rv0367c	Rv0367c	Hypothetical protein	-	1415.9	0.0759355	0.0881555	0.861381	0.389028	0.701607	no	no
Rv0368c	Rv0368c	Conserved hypothetical protein	-	176.416	-0.113106	0.271881	-0.416013	0.677401	0.87914	no	no
Rv0369c	Rv0369c	Possible membrane oxidoreductase	-	358.84	0.155338	0.134786	1.15248	0.249125	0.569362	no	no
Rv0370c	Rv0370c	Possible oxidoreductase	-	403.022	0.0419278	0.17826	0.235206	0.814049	0.945551	no	no
Rv0371c	Rv0371c	Conserved hypothetical protein	-	49.6548	0.869469	0.373537	2.32767	0.0199299	0.135487	no	no
Rv0372c	Rv0372c	Conserved hypothetical protein	-	81.4578	0.420298	0.249667	1.68344	0.0922907	0.339975	no	no
Rv0373c	Rv0373c	Probable carbon monoxyde dehydrogenase (large chain)	-	1044.77	0.425092	0.168292	2.52591	0.0115398	0.098631	no	no
Rv0374c	Rv0374c	Probable carbon monoxyde dehydrogenase (small chain)	-	125.202	0.36839	0.300525	1.22582	0.220267	0.533059	no	no
Rv0375c	Rv0375c	Probable carbon monoxyde dehydrogenase (medium chain)	-	152.936	0.585365	0.256233	2.2845	0.0223421	0.147332	no	no
Rv0376c	Rv0376c	Conserved hypothetical protein	-	588.273	0.391752	0.181193	2.16207	0.0306125	0.181683	no	no
Rv0377	Rv0377	Probable transcriptional regulatory protein (probably LysR-family)	+	742.808	0.0390018	0.0992404	0.393003	0.694317	0.886327	no	no
Rv0378	Rv0378	Conserved hypothetical glycine rich protein	+	28.3535	0.0268842	0.52937	0.0507852	0.959497	0.986677	no	no
secE2	Rv0379	Possible protein transport protein SecE2	+	2851.4	-0.0412058	0.229972	-0.179178	0.857798	0.96065	no	no
Rv0380c	Rv0380c	Possible RNA methyltransferase (RNA methylase)	-	675.192	-0.12549	0.113108	-1.10947	0.267227	0.586707	no	no
Rv0381c	Rv0381c	Hypothetical protein	-	931.31	0.0280359	0.122804	0.228298	0.819415	0.945977	no	no
pyrE	Rv0382c	Probable orotate phosphoribosyltransferase PyrE (OPRT) (oprtase)	-	2320.7	0.0454314	0.0762463	0.595851	0.551275	0.817301	no	no
Rv0383c	Rv0383c	Possible conserved secreted protein	-	9496.07	-0.0796939	0.106053	-0.751454	0.45238	0.754773	no	no
clpB	Rv0384c	Probable endopeptidase ATP binding protein (chain B) ClpB (ClpB protein) (heat shock protein F84.1)	-	9364.62	0.0732272	0.0823049	0.889707	0.373623	0.690325	no	no
Rv0385	Rv0385	Probable monooxygenase	+	810.357	-0.115811	0.141063	-0.820984	0.411656	0.719243	no	no
Rv0386	Rv0386	Probable transcriptional regulatory protein (probably LuxR/UhpA-family)	+	7380.41	0.22895	0.0665251	3.44157	0.000578359	0.0118818	yes	no
purT	Rv0389	Probable phosphoribosylglycinamide formyltransferase 2 PurT (GART 2) (gar transformylase 2) (5'-phosphoribosylglycinamide transformylase 2) (formate-dependent gar transformylase)	+	1405.43	0.0588743	0.144449	0.407579	0.683583	0.881351	no	no
Rv0390	Rv0390	Conserved protein	+	1975.62	-0.0222401	0.0898515	-0.247521	0.804505	0.940014	no	no
metZ	Rv0391	Probable O-succinylhomoserine sulfhydrylase MetZ (OSH sulfhydrylase)	+	3693.04	0.0727593	0.0834214	0.87219	0.383105	0.69977	no	no
ndhA	Rv0392c	Probable membrane NADH dehydrogenase NdhA	-	4984.84	0.0781242	0.0750957	1.04033	0.298188	0.618374	no	no
Rv0394c	Rv0394c	Possible secreted protein	-	2337.64	-0.00248647	0.0772857	-0.0321724	0.974335	0.990078	no	no
Rv0395	Rv0395	Hypothetical protein	+	35.5981	0.117864	0.394652	0.298651	0.765206	0.918899	no	no
Rv0396	Rv0396	Hypothetical protein	+	105.675	0.276723	0.270852	1.02167	0.306935	0.626094	no	no
Rv0397A	Rv0397A	Conserved protein	+	1032.23	0.201684	0.107624	1.87398	0.060933	0.270902	no	no
Rv0398c	Rv0398c	Possible secreted protein	-	901.598	-0.0135137	0.109822	-0.123051	0.902067	0.972495	no	no
lpqK	Rv0399c	Possible conserved lipoprotein LpqK	-	1940.49	0.0997027	0.101904	0.978398	0.327877	0.650669	no	no
fadE7	Rv0400c	Acyl-CoA dehydrogenase FadE7	-	2332.98	0.137205	0.0882691	1.55439	0.12009	0.393449	no	no
Rv0401	Rv0401	Probable conserved transmembrane protein	+	322.402	0.0966378	0.198037	0.487978	0.625566	0.85028	no	no
mmpL1	Rv0402c	Probable conserved transmembrane transport protein MmpL1	-	6079.84	-0.0982871	0.0890979	-1.10314	0.269968	0.589161	no	no
mmpS1	Rv0403c	Probable conserved membrane protein MmpS1	-	636.027	-0.0111859	0.122491	-0.0913203	0.927238	0.97696	no	no
fadD30	Rv0404	Fatty-acid-AMP ligase FadD30 (fatty-acid-AMP synthetase) (fatty-acid-AMP synthase)	+	9175.56	0.171827	0.0870991	1.97278	0.0485206	0.238082	no	no
pks6	Rv0405	Probable membrane bound polyketide synthase Pks6	+	8786.22	0.296899	0.0846799	3.50614	0.000454663	0.010082	yes	no
Rv0406c	Rv0406c	Beta lactamase like protein	-	1352.54	-0.0251573	0.090559	-0.2778	0.781166	0.926643	no	no
fgd1	Rv0407	F420-dependent glucose-6-phosphate dehydrogenase Fgd1	+	4287.25	0.0122657	0.0863831	0.141991	0.887087	0.968131	no	no
pta	Rv0408	Probable phosphate acetyltransferase Pta (phosphotransacetylase)	+	5915.99	0.176129	0.068585	2.56804	0.0102276	0.0901456	no	no
ackA	Rv0409	Probable acetate kinase AckA (acetokinase)	+	2758.49	0.292538	0.0949239	3.08181	0.00205745	0.029817	yes	no
pknG	Rv0410c	Serine/threonine-protein kinase PknG (protein kinase G) (STPK G)	-	14831.1	-0.126138	0.0824209	-1.53041	0.125914	0.405856	no	no
glnH	Rv0411c	Probable glutamine-binding lipoprotein GlnH (GLNBP)	-	6450.63	-0.164115	0.0590927	-2.77725	0.00548216	0.0610509	no	no
Rv0412c	Rv0412c	Possible conserved membrane protein	-	8251.26	-0.232715	0.0745054	-3.12346	0.00178737	0.0268392	yes	no
mutT3	Rv0413	Possible mutator protein MutT3 (7,8-dihydro-8-oxoguanine-triphosphatase) (8-oxo-dGTPase) (dGTP pyrophosphohydrolase)	+	1593.51	0.0180367	0.0948026	0.190255	0.849109	0.958002	no	no
thiE	Rv0414c	Thiamine-phosphate pyrophosphorylase ThiE (TMP pyrophosphorylase) (TMP-PPASE) (thiamine-phosphate synthase)	-	808.13	0.0753126	0.109294	0.689083	0.490771	0.781181	no	no
thiO	Rv0415	Possible thiamine biosynthesis oxidoreductase ThiO	+	1835.34	0.110291	0.074409	1.48223	0.13828	0.42507	no	no
thiS	Rv0416	Possible protein ThiS	+	472.03	0.0240126	0.160868	0.149269	0.881342	0.966782	no	no
thiG	Rv0417	Probable thiamin biosynthesis protein ThiG (thiazole biosynthesis protein)	+	1523.82	0.0587136	0.114527	0.512664	0.608187	0.844909	no	no
lpqL	Rv0418	Probable lipoprotein aminopeptidase LpqL	+	12461.5	-0.183994	0.073855	-2.49128	0.0127283	0.104826	no	no
lpqM	Rv0419	Possible lipoprotein peptidase LpqM	+	10369.4	0.015497	0.0717665	0.215937	0.829037	0.949103	no	no
Rv0420c	Rv0420c	Possible transmembrane protein	-	1552.9	-0.116402	0.106589	-1.09206	0.274805	0.594271	no	no
Rv0421c	Rv0421c	Conserved hypothetical protein	-	1523.81	0.0942017	0.10968	0.858877	0.390408	0.701745	no	no
thiD	Rv0422c	Probable phosphomethylpyrimidine kinase ThiD (HMP-phosphate kinase) (HMP-P kinase)	-	3887.07	0.00240389	0.0816931	0.0294259	0.976525	0.991104	no	no
thiC	Rv0423c	Probable thiamine biosynthesis protein ThiC	-	21820.4	-0.0763052	0.107931	-0.706985	0.479576	0.774907	no	no
Rv0424c	Rv0424c	Hypothetical protein	-	4295.54	-0.0134696	0.135043	-0.0997429	0.920548	0.975753	no	no
ctpH	Rv0425c	Possible metal cation transporting P-type ATPase CtpH	-	21238.8	0.144584	0.0606143	2.38531	0.0170648	0.121072	no	no
Rv0426c	Rv0426c	Possible transmembrane protein	-	5655.05	0.07796	0.136461	0.571298	0.567797	0.826615	no	no
xthA	Rv0427c	Probable exodeoxyribonuclease III protein XthA (exonuclease III) (EXO III) (AP endonuclease VI)	-	3176.39	-0.0204139	0.0799418	-0.255359	0.798446	0.935272	no	no
Rv0428c	Rv0428c	GCN5-related N-acetyltransferase	-	2698.38	-0.155255	0.0777812	-1.99605	0.0459288	0.229037	no	no
def	Rv0429c	Probable polypeptide deformylase Def (PDF) (formylmethionine deformylase)	-	3425.27	-0.169985	0.0909343	-1.86932	0.0615788	0.273124	no	no
Rv0430	Rv0430	Conserved hypothetical protein	+	8558.27	0.0477239	0.193176	0.247049	0.804871	0.940147	no	no
Rv0431	Rv0431	Putative tuberculin related peptide	+	5321.46	0.00121293	0.0731907	0.0165721	0.986778	0.995833	no	no
sodC	Rv0432	Periplasmic superoxide dismutase [Cu-Zn] SodC	+	8114.41	-0.134598	0.0894269	-1.50511	0.132295	0.416099	no	no
Rv0433	Rv0433	Conserved hypothetical protein	+	10114.3	-0.0468401	0.0970553	-0.482613	0.629371	0.852845	no	no
Rv0434	Rv0434	Conserved hypothetical protein	+	1899.75	0.0414599	0.0942497	0.439894	0.660014	0.870042	no	no
Rv0435c	Rv0435c	Putative conserved ATPase	-	4875.59	-0.0260208	0.0822311	-0.316434	0.751673	0.914166	no	no
pssA	Rv0436c	Probable CDP-diacylglycerol--serine O-phosphatidyltransferase PssA (PS synthase) (phosphatidylserine synthase)	-	3948.76	-0.115998	0.0798608	-1.4525	0.146363	0.435364	no	no
psd	Rv0437c	Possible phosphatidylserine decarboxylase Psd (PS decarboxylase)	-	1889.88	-0.0621239	0.0897025	-0.692554	0.488589	0.780389	no	no
moeA2	Rv0438c	Probable molybdopterin biosynthesis protein MoeA2	-	2025.58	-0.154629	0.105369	-1.46749	0.142242	0.431341	no	no
Rv0439c	Rv0439c	Probable dehydrogenase/reductase	-	4072.7	-0.234981	0.0664186	-3.53788	0.000403354	0.00925505	yes	no
groEL2	Rv0440	60 kDa chaperonin 2 GroEL2 (protein CPN60-2) (GroEL protein 2) (65 kDa antigen) (heat shock protein 65) (cell wall protein A) (antigen A)	+	94374.2	-0.196546	0.241883	-0.812569	0.416465	0.721763	no	no
Rv0441c	Rv0441c	Hypothetical protein	-	769.759	-0.0702705	0.141955	-0.49502	0.620586	0.849763	no	no
Rv0443	Rv0443	Conserved protein	+	1789.04	-0.088396	0.0884682	-0.999183	0.317706	0.639345	no	no
rskA	Rv0444c	Anti-sigma factor RskA (regulator of sigma K)	-	5630.03	-0.0715948	0.0709398	-1.00923	0.312863	0.633348	no	no
sigK	Rv0445c	Alternative RNA polymerase sigma factor SigK	-	4105.45	-0.0343697	0.0952218	-0.360943	0.718142	0.899351	no	no
Rv0446c	Rv0446c	Possible conserved transmembrane protein	-	2342.17	-0.0395395	0.0876991	-0.450854	0.652095	0.865734	no	no
ufaA1	Rv0447c	Probable cyclopropane-fatty-acyl-phospholipid synthase UfaA1 (cyclopropane fatty acid synthase) (CFA synthase)	-	1987.41	0.0183109	0.0782377	0.234041	0.814953	0.945977	no	no
Rv0448c	Rv0448c	Conserved hypothetical protein	-	153.624	-0.0551218	0.211963	-0.260054	0.794822	0.934541	no	no
Rv0449c	Rv0449c	Conserved hypothetical protein	-	2172.02	-0.09052	0.107932	-0.838677	0.40165	0.71041	no	no
mmpL4	Rv0450c	Probable conserved transmembrane transport protein MmpL4	-	37436.2	-0.0260557	0.113086	-0.230405	0.817777	0.945977	no	no
mmpS4	Rv0451c	Probable conserved membrane protein MmpS4	-	8040.06	-0.0241395	0.121203	-0.199165	0.842133	0.953192	no	no
Rv0452	Rv0452	Possible transcriptional regulatory protein	+	2151.07	-0.0687714	0.0753873	-0.912241	0.361642	0.680524	no	no
Rv0454	Rv0454	Conserved hypothetical protein	+	128.554	-0.296413	0.300521	-0.98633	0.323971	0.646507	no	no
Rv0455c	Rv0455c	Conserved protein	-	10921.2	0.0540004	0.17999	0.300018	0.764163	0.918899	no	no
echA2	Rv0456c	enoyl-CoA hydratase EchA2 (enoyl hydrase) (unsaturated acyl-CoA hydratase) (crotonase)	-	1251.35	0.372521	0.153531	2.42635	0.0152514	0.114508	no	no
mazE1	Rv0456B	Possible antitoxin MazE1	-	289.989	0.0391508	0.172092	0.227499	0.820036	0.945977	no	no
Rv0457c	Rv0457c	Probable peptidase	-	2931	-0.224794	0.124906	-1.7997	0.0719081	0.296137	no	no
Rv0458	Rv0458	Probable aldehyde dehydrogenase	+	5964.33	0.129746	0.0685543	1.8926	0.0584114	0.265694	no	no
Rv0459	Rv0459	Conserved hypothetical protein	+	932.841	0.2921	0.118328	2.46857	0.0135655	0.108379	no	no
Rv0460	Rv0460	Conserved hydrophobic protein	+	2368.5	-0.0859869	0.127516	-0.674322	0.500107	0.784444	no	no
Rv0461	Rv0461	Probable transmembrane protein	+	4024.69	0.00944139	0.0918388	0.102804	0.918119	0.974686	no	no
lpdC	Rv0462	Dihydrolipoamide dehydrogenase LpdC (lipoamide reductase (NADH)) (lipoyl dehydrogenase) (dihydrolipoyl dehydrogenase) (diaphorase)	+	19768.7	-0.198148	0.0972557	-2.0374	0.0416104	0.216765	no	no
Rv0463	Rv0463	Probable conserved membrane protein	+	1476.45	-0.126191	0.0948645	-1.33022	0.183446	0.486457	no	no
Rv0464c	Rv0464c	Conserved protein	-	6991.33	-0.0795774	0.0910351	-0.874139	0.382042	0.698853	no	no
Rv0465c	Rv0465c	Probable transcriptional regulatory protein	-	5016.41	-0.211216	0.091768	-2.30163	0.0213559	0.142081	no	no
Rv0466	Rv0466	Conserved protein	+	4419.46	-0.100154	0.0758542	-1.32035	0.186717	0.490607	no	no
icl1	Rv0467	Isocitrate lyase Icl (isocitrase) (isocitratase)	+	1919.93	-0.209567	0.150016	-1.39697	0.162423	0.457304	no	no
fadB2	Rv0468	3-hydroxybutyryl-CoA dehydrogenase FadB2 (beta-hydroxybutyryl-CoA dehydrogenase) (BHBD)	+	4054.22	-0.0357911	0.0600678	-0.595844	0.551279	0.817301	no	no
umaA	Rv0469	Possible mycolic acid synthase UmaA	+	13147.3	-0.0267894	0.122828	-0.218104	0.827348	0.947992	no	no
pcaA	Rv0470c	Mycolic acid synthase PcaA (cyclopropane synthase)	-	15165.3	-0.04685	0.144848	-0.323442	0.746361	0.913437	no	no
Rv0470A	Rv0470A	Hypothetical protein	-	422.71	0.258978	0.154787	1.67313	0.0943018	0.34433	no	no
Rv0471c	Rv0471c	Hypothetical protein	-	1579.63	0.00642478	0.0923491	0.0695705	0.944536	0.983327	no	no
Rv0472c	Rv0472c	Probable transcriptional regulatory protein (possibly TetR-family)	-	6693.01	-0.107819	0.0891988	-1.20875	0.226758	0.540058	no	no
Rv0473	Rv0473	Possible conserved transmembrane protein	+	3934.38	0.0134467	0.078989	0.170235	0.864826	0.96065	no	no
Rv0474	Rv0474	Probable transcriptional regulatory protein	+	3707.93	0.0758827	0.084064	0.902677	0.366697	0.683742	no	no
hbhA	Rv0475	Iron-regulated heparin binding hemagglutinin HbhA (adhesin)	+	8058.37	-0.0412562	0.137798	-0.299395	0.764638	0.918899	no	no
Rv0476	Rv0476	Possible conserved transmembrane protein	+	2597.91	0.0578645	0.12568	0.460412	0.645221	0.861292	no	no
Rv0477	Rv0477	Possible conserved secreted protein	+	3195.51	0.00401872	0.0790908	0.0508115	0.959476	0.986677	no	no
deoC	Rv0478	Probable deoxyribose-phosphate aldolase DeoC (phosphodeoxyriboaldolase) (deoxyriboaldolase)	+	1836.67	0.142416	0.0895408	1.59052	0.111719	0.378709	no	no
Rv0479c	Rv0479c	Probable conserved membrane protein	-	13980.4	-0.161501	0.119464	-1.35189	0.176411	0.475559	no	no
Rv0480c	Rv0480c	Possible amidohydrolase	-	3088.27	-0.00126288	0.0915334	-0.0137969	0.988992	0.996723	no	no
Rv0481c	Rv0481c	Hypothetical protein	-	2932.25	0.186007	0.082698	2.24924	0.0244974	0.156307	no	no
murB	Rv0482	Probable UDP-N-acetylenolpyruvoylglucosamine reductase MurB (UDP-N-acetylmuramate dehydrogenase)	+	1504.84	-0.0254814	0.0991928	-0.256888	0.797265	0.935272	no	no
lprQ	Rv0483	Probable conserved lipoprotein LprQ	+	17291.6	-0.41878	0.0890283	-4.70389	2.55e-06	0.000140348	yes	no
Rv0484c	Rv0484c	Probable short-chain type oxidoreductase	-	2290.68	-0.0328736	0.085099	-0.386298	0.699276	0.889067	no	no
Rv0485	Rv0485	Possible transcriptional regulatory protein	+	4502.79	-0.19235	0.0802511	-2.39685	0.0165365	0.119455	no	no
mshA	Rv0486	Glycosyltransferase MshA	+	4789.83	0.074958	0.0834846	0.897867	0.369257	0.68527	no	no
Rv0487	Rv0487	Conserved hypothetical protein	+	2261.86	0.271096	0.0920073	2.94646	0.00321429	0.0413054	yes	no
Rv0488	Rv0488	Probable conserved integral membrane protein	+	365.691	0.335498	0.154558	2.17069	0.0299543	0.17921	no	no
gpm1	Rv0489	Probable phosphoglycerate mutase 1 Gpm1 (phosphoglyceromutase) (PGAM) (BPG-dependent PGAM)	+	2514.45	0.0409549	0.0878377	0.466257	0.641032	0.859727	no	no
senX3	Rv0490	Putative two component sensor histidine kinase SenX3	+	11695.2	-0.0728498	0.102164	-0.713071	0.475802	0.771891	no	no
regX3	Rv0491	Two component sensory transduction protein RegX3 (transcriptional regulatory protein) (probably LuxR-family)	+	3506.1	0.127054	0.103482	1.22779	0.219525	0.531608	no	no
Rv0492c	Rv0492c	Probable oxidoreductase GMC-type	-	1576.65	0.370236	0.125854	2.94179	0.00326318	0.0413595	yes	no
Rv0492A	Rv0492A	Hypothetical protein	-	255.671	0.413818	0.144221	2.86934	0.00411325	0.0497005	yes	no
Rv0493c	Rv0493c	Conserved protein	-	1158.09	0.380809	0.103743	3.67071	0.000241879	0.00641409	yes	no
Rv0494	Rv0494	Probable transcriptional regulatory protein (probably GntR-family)	+	178.156	0.100713	0.18769	0.53659	0.591551	0.837594	no	no
Rv0495c	Rv0495c	Conserved hypothetical protein	-	6223.28	-0.206661	0.0981018	-2.10659	0.0351527	0.197517	no	no
Rv0496	Rv0496	Conserved hypothetical protein	+	7949.58	-0.0915403	0.0760307	-1.20399	0.228593	0.541985	no	no
Rv0497	Rv0497	Probable conserved transmembrane protein	+	7097.22	-0.0950682	0.0871756	-1.09054	0.275477	0.5947	no	no
Rv0498	Rv0498	Conserved hypothetical protein	+	2295.01	0.0350921	0.0754319	0.465215	0.641777	0.859765	no	no
Rv0499	Rv0499	Conserved hypothetical protein	+	1827.6	-0.00954014	0.0874959	-0.109035	0.913175	0.973607	no	no
proC	Rv0500	Probable pyrroline-5-carboxylate reductase ProC (P5CR) (P5C reductase)	+	4116.77	-0.182072	0.0900821	-2.02117	0.0432618	0.220676	no	no
Rv0500A	Rv0500A	Conserved protein	+	5488.11	0.0603263	0.156317	0.385922	0.699555	0.889067	no	no
Rv0500B	Rv0500B	Conserved hypothetical protein	+	5125.3	-0.103704	0.170133	-0.609546	0.542162	0.809886	no	no
galE2	Rv0501	Possible UDP-glucose 4-epimerase GalE2 (galactowaldenase) (UDP-galactose 4-epimerase) (uridine diphosphate galactose 4-epimerase) (uridine diphospho-galactose 4-epimerase)	+	12913.8	-0.158254	0.113827	-1.3903	0.164438	0.461587	no	no
Rv0502	Rv0502	Conserved protein	+	14700.5	0.0224485	0.129297	0.17362	0.862164	0.96065	no	no
cmaA2	Rv0503c	Cyclopropane-fatty-acyl-phospholipid synthase 2 CmaA2 (cyclopropane fatty acid synthase) (CFA synthase) (cyclopropane mycolic acid synthase 2) (mycolic acid trans-cyclopropane synthetase)	-	19264.2	0.0580301	0.156927	0.36979	0.711539	0.894567	no	no
Rv0504c	Rv0504c	Conserved protein	-	4616.45	6.9e-05	0.0904173	0.000763376	0.999391	0.999391	no	no
serB1	Rv0505c	Possible phosphoserine phosphatase SerB1 (PSP) (O-phosphoserine phosphohydrolase) (pspase)	-	6231.39	0.0337532	0.0854052	0.395212	0.692686	0.885383	no	no
mmpS2	Rv0506	Probable conserved membrane protein MmpS2	+	3891.95	0.281728	0.12768	2.20651	0.0273481	0.169391	no	no
mmpL2	Rv0507	Probable conserved transmembrane transport protein MmpL2	+	9665.52	0.301449	0.086355	3.49081	0.000481565	0.0105297	yes	no
Rv0508	Rv0508	Conserved hypothetical protein	+	793.362	0.348912	0.126564	2.7568	0.00583707	0.0636291	no	no
hemA	Rv0509	Probable glutamyl-tRNA reductase HemA (GLUTR)	+	10359.2	-0.020247	0.07849	-0.257957	0.79644	0.935272	no	no
hemC	Rv0510	Probable porphobilinogen deaminase HemC (PBG) (hydroxymethylbilane synthase) (HMBS) (pre-uroporphyrinogen synthase)	+	8116.03	-0.0862985	0.0901714	-0.957049	0.338542	0.662728	no	no
hemD	Rv0511	Probable uroporphyrin-III C-methyltransferase HemD (uroporphyrinogen III methylase) (urogen III methylase) (SUMT) (urogen III methylase) (UROM)	+	9301.33	-0.0222531	0.0563189	-0.395128	0.692749	0.885383	no	no
hemB	Rv0512	Probable delta-aminolevulinic acid dehydratase HemB (porphobilinogen synthase) (ALAD) (ALADH)	+	4884.13	0.0151215	0.0690879	0.218874	0.826749	0.947643	no	no
Rv0513	Rv0513	Possible conserved transmembrane protein	+	2951.56	-0.0381825	0.0753836	-0.506509	0.6125	0.847257	no	no
Rv0514	Rv0514	Possible transmembrane protein	+	721.896	0.0420268	0.0973096	0.431888	0.665823	0.873513	no	no
Rv0516c	Rv0516c	Possible anti-anti-sigma factor	-	4483.74	0.217575	0.120524	1.80524	0.0710375	0.294506	no	no
Rv0517	Rv0517	Possible membrane acyltransferase	+	2772.95	0.0364728	0.0919567	0.396629	0.691641	0.885026	no	no
Rv0518	Rv0518	Possible exported protein	+	1708.98	0.0472832	0.082845	0.570743	0.568174	0.826615	no	no
Rv0519c	Rv0519c	Possible conserved membrane protein	-	4241.11	0.210465	0.0693578	3.03448	0.00240949	0.0336159	yes	no
Rv0520	Rv0520	Possible methyltransferase/methylase (fragment)	+	688.26	0.137219	0.109807	1.24964	0.21143	0.525619	no	no
Rv0521	Rv0521	Possible methyltransferase/methylase (fragment)	+	213.256	0.215414	0.162187	1.32818	0.184118	0.487893	no	no
gabP	Rv0522	Probable GABA permease GabP (4-amino butyrate transport carrier) (GAMA-aminobutyrate permease)	+	1201.34	0.37445	0.113796	3.29052	0.00100001	0.0181507	yes	no
Rv0523c	Rv0523c	Conserved protein	-	1748.87	0.0264684	0.129021	0.205149	0.837456	0.952012	no	no
hemL	Rv0524	Probable glutamate-1-semialdehyde 2,1-aminomutase HemL (GSA) (glutamate-1-semialdehyde aminotransferase) (GSA-at)	+	5453.46	-0.189482	0.0704638	-2.68907	0.00716523	0.0725344	no	no
Rv0525	Rv0525	Conserved protein	+	2639.26	-0.213052	0.0826817	-2.57677	0.00997278	0.0881932	no	no
Rv0526	Rv0526	Possible thioredoxin protein (thiol-disulfide interchange protein)	+	3086.04	-0.0905086	0.0735134	-1.23118	0.218254	0.531254	no	no
ccdA	Rv0527	Possible cytochrome C-type biogenesis protein CcdA	+	1701.18	0.135964	0.112308	1.21063	0.226037	0.539419	no	no
Rv0528	Rv0528	Probable conserved transmembrane protein	+	4088.61	-0.134191	0.0867355	-1.54712	0.121833	0.39534	no	no
ccsA	Rv0529	Possible cytochrome C-type biogenesis protein CcsA	+	4112.83	-0.123947	0.064399	-1.92467	0.0542703	0.254255	no	no
Rv0530	Rv0530	Conserved protein	+	7931.62	-0.0455549	0.0930083	-0.489794	0.62428	0.85028	no	no
Rv0530A	Rv0530A	Conserved protein	-	759.943	0.153222	0.155421	0.985855	0.324204	0.646507	no	no
Rv0531	Rv0531	Possible conserved membrane protein	+	1637.42	0.136663	0.0792105	1.72532	0.0844705	0.32261	no	no
fabH	Rv0533c	3-oxoacyl-[acyl-carrier-protein] synthase III FabH (beta-ketoacyl-ACP synthase III) (KAS III)	-	7440.18	-0.099637	0.111024	-0.897439	0.369485	0.68527	no	no
menA	Rv0534c	1,4-dihydroxy-2-naphthoate octaprenyltransferase MenA (DHNA-octaprenyltransferase)	-	1576.73	0.00839925	0.137534	0.0610705	0.951303	0.984974	no	no
pnp	Rv0535	Probable 5'-methylthioadenosine phosphorylase Pnp (MTA phosphorylase)	+	687.318	0.020179	0.133466	0.151192	0.879825	0.966782	no	no
galE3	Rv0536	Probable UDP-glucose 4-epimerase GalE3 (galactowaldenase) (UDP-galactose 4-epimerase) (uridine diphosphate galactose 4-epimerase) (uridine diphospho-galactose 4-epimerase)	+	674.084	-0.0161553	0.172911	-0.0934318	0.925561	0.97696	no	no
Rv0537c	Rv0537c	Probable integral membrane protein	-	5448.19	0.0356572	0.0843733	0.422613	0.672578	0.876466	no	no
Rv0538	Rv0538	Possible conserved membrane protein	+	4350.7	0.109199	0.0918891	1.18838	0.234684	0.551528	no	no
Rv0539	Rv0539	Probable dolichyl-phosphate sugar synthase (dolichol-phosphate sugar synthetase) (dolichol-phosphate sugar transferase) (sugar phosphoryldolichol synthase)	+	914.036	0.224087	0.109473	2.04696	0.0406622	0.213834	no	no
Rv0540	Rv0540	Conserved hypothetical protein	+	489.629	0.442695	0.136593	3.24097	0.00119123	0.0205151	yes	no
Rv0541c	Rv0541c	Probable conserved integral membrane protein	-	1702.74	0.0361808	0.11001	0.328887	0.742241	0.910981	no	no
menE	Rv0542c	Possible O-succinylbenzoic acid--CoA ligase MenE (OSB-CoA synthetase) (O-succinylbenzoate-CoA synthase)	-	3475.69	-0.00308861	0.0937907	-0.0329308	0.97373	0.989879	no	no
Rv0543c	Rv0543c	Conserved protein	-	3436.86	-0.13805	0.11312	-1.22039	0.222318	0.534972	no	no
Rv0544c	Rv0544c	Possible conserved transmembrane protein	-	2766.6	-0.133994	0.102108	-1.31228	0.189424	0.494409	no	no
pitA	Rv0545c	Probable low-affinity inorganic phosphate transporter integral membrane protein PitA	-	15147.6	-0.153882	0.126927	-1.21237	0.22537	0.539419	no	no
Rv0546c	Rv0546c	Conserved protein	-	2693.34	-0.168715	0.0801649	-2.1046	0.0353263	0.197517	no	no
Rv0547c	Rv0547c	Possible oxidoreductase	-	2317.27	-0.130619	0.0904694	-1.44379	0.148799	0.438769	no	no
menB	Rv0548c	Naphthoate synthase MenB (dihydroxynaphthoic acid synthetase) (DHNA synthetase)	-	5147.87	-0.247248	0.0631299	-3.91649	8.98e-05	0.00268397	yes	no
vapC3	Rv0549c	Possible toxin VapC3	-	1483.22	-0.00837741	0.0789809	-0.106069	0.915528	0.974348	no	no
vapB3	Rv0550c	Possible antitoxin VapB3	-	512.517	-0.0836444	0.105145	-0.795517	0.426313	0.73018	no	no
fadD8	Rv0551c	Probable fatty-acid-CoA ligase FadD8 (fatty-acid-CoA synthetase) (fatty-acid-CoA synthase)	-	2670.11	0.0363844	0.104336	0.348725	0.727296	0.905246	no	no
Rv0552	Rv0552	Conserved protein	+	2094.2	0.0291679	0.088436	0.329819	0.741537	0.910843	no	no
menC	Rv0553	Probable muconate cycloisomerase MenC (cis,cis-muconate lactonizing enzyme) (MLE)	+	661.152	0.0923369	0.150499	0.613539	0.53952	0.806938	no	no
bpoC	Rv0554	Possible peroxidase BpoC (non-haem peroxidase)	+	3550.41	-0.147427	0.0740809	-1.99008	0.046582	0.231302	no	no
menD	Rv0555	Probable bifunctional menaquinone biosynthesis protein MenD : 2-succinyl-6-hydroxy-2,4-cyclohexadiene-1-carboxylate synthase (SHCHC synthase) + 2-oxoglutarate decarboxylase (alpha- ketoglutarate decarboxylase) (KDC)	+	6571.58	-0.0458155	0.0631562	-0.725432	0.468187	0.765673	no	no
Rv0556	Rv0556	Probable conserved transmembrane protein	+	3530.85	-0.122844	0.0826412	-1.48647	0.137154	0.423516	no	no
mgtA	Rv0557	Mannosyltransferase MgtA	+	2353.94	-0.0390246	0.0790582	-0.493619	0.621575	0.849763	no	no
menH	Rv0558	Probable ubiquinone/menaquinone biosynthesis methyltransferase MenH (2-heptaprenyl-1,4-naphthoquinone methyltransferase)	+	3477.25	-0.0359188	0.080301	-0.447302	0.654657	0.866772	no	no
Rv0559c	Rv0559c	Possible conserved secreted protein	-	8697.47	-0.107007	0.202552	-0.528292	0.597297	0.840941	no	no
Rv0560c	Rv0560c	Possible benzoquinone methyltransferase (methylase)	-	1248.59	0.0278426	0.0914604	0.304422	0.760806	0.918585	no	no
Rv0561c	Rv0561c	Possible oxidoreductase	-	1368.9	-0.0405096	0.138062	-0.293416	0.769204	0.919582	no	no
grcC1	Rv0562	Probable polyprenyl-diphosphate synthase GrcC1 (polyprenyl pyrophosphate synthetase)	+	8136.91	-0.0599756	0.0702214	-0.854093	0.393054	0.704519	no	no
htpX	Rv0563	Probable protease transmembrane protein heat shock protein HtpX	+	4977.73	-0.0984844	0.0601272	-1.63793	0.101436	0.359155	no	no
gpdA1	Rv0564c	Probable glycerol-3-phosphate dehydrogenase [NAD(P)+] GpdA1 (NAD(P)H-dependent glycerol-3-phosphate dehydrogenase) (NAD(P)H-dependent dihydroxyacetone-phosphate reductase)	-	2029.8	-0.0352612	0.0782477	-0.450635	0.652253	0.865734	no	no
Rv0565c	Rv0565c	Probable monooxygenase	-	5897.68	-0.100915	0.0619864	-1.62801	0.103522	0.363786	no	no
Rv0566c	Rv0566c	Conserved protein	-	3161.73	-0.0320531	0.0678639	-0.472314	0.636703	0.856959	no	no
Rv0567	Rv0567	Probable methyltransferase/methylase	+	9534.61	-0.223601	0.118228	-1.89126	0.0585894	0.266179	no	no
cyp135B1	Rv0568	Possible cytochrome P450 135B1 Cyp135B1	+	8079.51	0.00403802	0.0937037	0.0430935	0.965627	0.988299	no	no
Rv0569	Rv0569	Conserved protein	+	1560.8	0.0420569	0.09854	0.4268	0.669525	0.874679	no	no
nrdZ	Rv0570	Probable ribonucleoside-diphosphate reductase (large subunit) NrdZ (ribonucleotide reductase)	+	1687.2	0.0590537	0.112043	0.527062	0.598151	0.840941	no	no
Rv0571c	Rv0571c	Conserved protein	-	1226.49	-0.036596	0.131309	-0.278702	0.780474	0.926116	no	no
Rv0572c	Rv0572c	Hypothetical protein	-	1609.88	-0.128701	0.0911425	-1.41209	0.157924	0.449375	no	no
pncB2	Rv0573c	Nicotinic acid phosphoribosyltransferase PncB2	-	625.334	0.184608	0.136158	1.35584	0.17515	0.474086	no	no
Rv0574c	Rv0574c	Conserved hypothetical protein	-	639.871	0.0374498	0.162738	0.230123	0.817996	0.945977	no	no
Rv0575c	Rv0575c	Possible oxidoreductase	-	275.099	-0.142449	0.241959	-0.588732	0.556041	0.821105	no	no
Rv0576	Rv0576	Probable transcriptional regulatory protein (possibly ArsR-family)	+	3968.7	0.0712415	0.0907058	0.785413	0.432211	0.734897	no	no
TB27.3	Rv0577	Conserved protein TB27.3	+	4005.15	0.0792227	0.0694598	1.14056	0.254055	0.572926	no	no
Rv0579	Rv0579	Conserved hypothetical protein	+	1747.37	0.156665	0.0862829	1.81571	0.0694143	0.290323	no	no
Rv0580c	Rv0580c	Conserved protein	-	1416.85	-0.037361	0.117917	-0.316843	0.751363	0.914166	no	no
vapB26	Rv0581	Possible antitoxin VapB26	+	1415.29	0.0196133	0.129823	0.151077	0.879915	0.966782	no	no
vapC26	Rv0582	Possible toxin VapC26. Contains PIN domain.	+	1146.38	-0.0518169	0.126143	-0.410779	0.681234	0.880077	no	no
lpqN	Rv0583c	Probable conserved lipoprotein LpqN	-	3807.52	-0.182483	0.0741137	-2.46221	0.0138085	0.109386	no	no
Rv0584	Rv0584	Possible conserved exported protein	+	1728.46	0.003251	0.121893	0.0266709	0.978722	0.991988	no	no
Rv0585c	Rv0585c	Probable conserved integral membrane protein	-	1961.34	0.107725	0.112529	0.957304	0.338414	0.662728	no	no
mce2R	Rv0586	Probable transcriptional regulatory protein Mce2R (GntR-family)	+	3814.05	0.046348	0.07275	0.637086	0.524069	0.798792	no	no
yrbE2A	Rv0587	Conserved hypothetical integral membrane protein YrbE2A	+	3634.4	0.150116	0.0774232	1.9389	0.0525137	0.250126	no	no
yrbE2B	Rv0588	Conserved hypothetical integral membrane protein YrbE2B	+	4026.82	0.188996	0.0670059	2.82059	0.00479359	0.0558356	no	no
mce2A	Rv0589	Mce-family protein Mce2A	+	4540.18	0.267236	0.076293	3.50275	0.000460478	0.0101278	yes	no
mce2B	Rv0590	Mce-family protein Mce2B	+	4698.35	0.106875	0.0713632	1.49762	0.134232	0.41868	no	no
Rv0590A	Rv0590A	Mce-family related protein	+	736.857	0.251851	0.119517	2.10724	0.0350964	0.197517	no	no
mce2C	Rv0591	Mce-family protein Mce2C	+	519.607	0.151415	0.19478	0.777365	0.436943	0.739037	no	no
mce2D	Rv0592	Mce-family protein Mce2D	+	548.885	0.219872	0.150688	1.45912	0.144532	0.433363	no	no
lprL	Rv0593	Possible Mce-family lipoprotein LprL (Mce-family lipoprotein Mce2E)	+	587.081	0.287358	0.170991	1.68055	0.0928511	0.340697	no	no
mce2F	Rv0594	Mce-family protein Mce2F	+	1355.63	0.143517	0.138001	1.03997	0.298354	0.618374	no	no
vapC4	Rv0595c	Possible toxin VapC4	-	1081.08	-0.148262	0.103738	-1.4292	0.152948	0.445265	no	no
vapB4	Rv0596c	Possible antitoxin VapB4	-	497.501	-0.0482593	0.116275	-0.415043	0.67811	0.879755	no	no
Rv0597c	Rv0597c	Conserved hypothetical protein	-	3951.46	-0.0850742	0.0636519	-1.33655	0.181368	0.483347	no	no
vapC27	Rv0598c	Possible toxin VapC27. Contains PIN domain.	-	3962.65	-0.297541	0.105477	-2.82091	0.00478873	0.0558356	no	no
vapB27	Rv0599c	Possible antitoxin VapB27	-	1672.94	-0.223927	0.107779	-2.07766	0.0377411	0.205536	no	no
Rv0600c	Rv0600c	Two component sensor kinase [second part]	-	76.4957	0.0289999	0.284519	0.101926	0.918815	0.975149	no	no
Rv0601c	Rv0601c	Two component sensor kinase [first part]	-	105.805	-0.175715	0.239692	-0.733088	0.463505	0.762349	no	no
tcrA	Rv0602c	Two component DNA binding transcriptional regulatory protein TcrA	-	98.1627	0.277988	0.265045	1.04883	0.294256	0.615038	no	no
Rv0603	Rv0603	Possible exported protein	+	115.972	0.0133675	0.310515	0.0430495	0.965662	0.988299	no	no
lpqO	Rv0604	Probable conserved lipoprotein LpqO	+	2086.95	-0.0373214	0.09073	-0.411346	0.680819	0.880077	no	no
Rv0605	Rv0605	Possible resolvase	+	899.106	0.190209	0.140899	1.34997	0.177025	0.476528	no	no
Rv0606	Rv0606	Possible transposase (fragment)	+	2042.52	0.0195464	0.11723	0.166735	0.867578	0.961032	no	no
Rv0607	Rv0607	Hypothetical protein	+	317.744	0.220584	0.159355	1.38423	0.166288	0.464167	no	no
vapC28	Rv0609	Possible toxin VapC28. Contains PIN domain.	+	3935.32	-0.0522602	0.0913184	-0.572285	0.567129	0.826381	no	no
Rv0609A	Rv0609A	Conserved hypothetical protein	+	1571.49	0.0479265	0.0858361	0.558349	0.576606	0.830625	no	no
Rv0610c	Rv0610c	Hypothetical protein	-	2077.73	0.0850534	0.0950148	0.895159	0.370702	0.686846	no	no
Rv0611c	Rv0611c	Hypothetical protein	-	2148.34	0.0917023	0.108729	0.843404	0.399003	0.707383	no	no
Rv0612	Rv0612	Conserved hypothetical protein	+	255.698	0.0824491	0.168806	0.488426	0.625248	0.85028	no	no
Rv0613c	Rv0613c	Unknown protein	-	13562.4	-0.19693	0.0689596	-2.85573	0.00429379	0.0514567	no	no
Rv0614	Rv0614	Conserved hypothetical protein	+	400.01	0.172573	0.147088	1.17326	0.240691	0.557815	no	no
Rv0615	Rv0615	Probable integral membrane protein	+	1151.43	0.225168	0.13057	1.72449	0.0846187	0.322846	no	no
Rv0616c	Rv0616c	Hypothetical protein	-	149.731	-0.271738	0.22966	-1.18322	0.236722	0.552272	no	no
vapB29	Rv0616A	Possible antitoxin VapB29	+	1006.6	-0.111142	0.101915	-1.09053	0.27548	0.5947	no	no
vapC29	Rv0617	Possible toxin VapC29. Contains PIN domain.	+	1536.81	-0.156687	0.106673	-1.46885	0.141874	0.430574	no	no
galTa	Rv0618	Probable galactose-1-phosphate uridylyltransferase GalTa [first part]	+	844.014	-0.0582629	0.144732	-0.402557	0.687275	0.883369	no	no
galTb	Rv0619	Probable galactose-1-phosphate uridylyltransferase GalTb [second part]	+	108.522	-0.186871	0.276112	-0.676794	0.498536	0.783534	no	no
galK	Rv0620	Probable galactokinase GalK (galactose kinase)	+	17.4287	-0.111294	0.470704	-0.236442	0.81309	0.944912	no	no
Rv0621	Rv0621	Possible membrane protein	+	674.573	0.371264	0.119438	3.10843	0.00188087	0.0280182	yes	no
Rv0622	Rv0622	Possible membrane protein	+	726.668	0.42735	0.162363	2.63206	0.00848692	0.0807445	no	no
vapB30	Rv0623	Possible antitoxin VapB30	+	1056.76	0.0132957	0.121157	0.109739	0.912616	0.973607	no	no
vapC30	Rv0624	Possible toxin VapC30. Contains PIN domain.	+	2018.63	-0.0380979	0.0960218	-0.396763	0.691542	0.885026	no	no
Rv0625c	Rv0625c	Probable conserved transmembrane protein	-	1211.95	0.0566688	0.101688	0.557281	0.577335	0.830625	no	no
vapB5	Rv0626	Possible antitoxin VapB5	+	1492.58	-0.0426599	0.0856743	-0.497931	0.618533	0.849763	no	no
vapC5	Rv0627	Possible toxin VapC5	+	1537.33	0.0684378	0.102559	0.667303	0.504579	0.788062	no	no
Rv0628c	Rv0628c	Conserved hypothetical protein	-	2079.47	0.0944738	0.0920512	1.02632	0.304742	0.624355	no	no
recD	Rv0629c	Probable exonuclease V (alpha chain) RecD (exodeoxyribonuclease V alpha chain) (exodeoxyribonuclease V polypeptide)	-	926.64	0.289149	0.17504	1.6519	0.0985551	0.353305	no	no
recB	Rv0630c	Probable exonuclease V (beta chain) RecB (exodeoxyribonuclease V beta chain)(exodeoxyribonuclease V polypeptide) (chi-specific endonuclease)	-	1917.89	0.22231	0.134103	1.65775	0.0973675	0.350523	no	no
recC	Rv0631c	Probable exonuclease V (gamma chain) RecC (exodeoxyribonuclease V gamma chain)(exodeoxyribonuclease V polypeptide)	-	2182.92	0.055276	0.148628	0.37191	0.70996	0.894524	no	no
echA3	Rv0632c	Probable enoyl-CoA hydratase EchA3 (enoyl hydrase) (unsaturated acyl-CoA hydratase) (crotonase)	-	11138.1	-0.184199	0.120554	-1.52794	0.126527	0.407479	no	no
Rv0633c	Rv0633c	Possible exported protein	-	5130.69	-0.06428	0.0590832	-1.08796	0.276614	0.595874	no	no
Rv0634c	Rv0634c	Possible glyoxalase II (hydroxyacylglutathione hydrolase) (GLX II)	-	4240.18	-0.0769097	0.0821869	-0.93579	0.349381	0.670781	no	no
Rv0634A	Rv0634A	Unknown protein	+	4403.41	0.00672853	0.163148	0.0412418	0.967103	0.988299	no	no
rpmG2	Rv0634B	50S ribosomal protein L33 RpmG2	+	8086.91	-0.207252	0.172427	-1.20197	0.229376	0.543495	no	no
hadA	Rv0635	(3R)-hydroxyacyl-ACP dehydratase subunit HadA	+	15919.4	-0.14871	0.153777	-0.96705	0.333519	0.658181	no	no
hadB	Rv0636	(3R)-hydroxyacyl-ACP dehydratase subunit HadB	+	13940.8	-0.203594	0.163	-1.24904	0.211651	0.525619	no	no
hadC	Rv0637	(3R)-hydroxyacyl-ACP dehydratase subunit HadC	+	16750.7	-0.21867	0.174205	-1.25524	0.20939	0.523685	no	no
secE1	Rv0638	Probable preprotein translocase SecE1	+	10392.1	-0.273837	0.123064	-2.22517	0.02607	0.163276	no	no
nusG	Rv0639	Probable transcription antitermination protein NusG	+	16919	-0.209324	0.133028	-1.57353	0.115596	0.384532	no	no
rplK	Rv0640	50S ribosomal protein L11 RplK	+	15780.8	-0.245622	0.167977	-1.46223	0.143677	0.433363	no	no
rplA	Rv0641	50S ribosomal protein L1 RplA	+	18398.3	-0.353653	0.163241	-2.16644	0.0302775	0.17998	no	no
mmaA4	Rv0642c	Methoxy mycolic acid synthase 4 MmaA4 (methyl mycolic acid synthase 4) (MMA4) (hydroxy mycolic acid synthase)	-	26684.6	-0.0970816	0.171284	-0.566787	0.570859	0.8277	no	no
mmaA3	Rv0643c	Methoxy mycolic acid synthase 3 MmaA3 (methyl mycolic acid synthase 3) (MMA3) (hydroxy mycolic acid synthase)	-	17870.7	-0.0464288	0.135937	-0.341546	0.732692	0.907278	no	no
mmaA2	Rv0644c	Methoxy mycolic acid synthase 2 MmaA2 (methyl mycolic acid synthase 2) (MMA2) (hydroxy mycolic acid synthase)	-	9491.11	-0.0392532	0.107745	-0.364316	0.715622	0.897098	no	no
mmaA1	Rv0645c	Methoxy mycolic acid synthase 1 MmaA1 (methyl mycolic acid synthase 1) (MMA1) (hydroxy mycolic acid synthase)	-	2998.73	0.107962	0.087823	1.22932	0.218952	0.531254	no	no
lipG	Rv0646c	Probable lipase/esterase LipG	-	4284.97	-0.144573	0.0596142	-2.42514	0.0153024	0.114606	no	no
Rv0647c	Rv0647c	Conserved protein	-	6502.82	-0.205531	0.0745361	-2.75747	0.00582502	0.0636291	no	no
Rv0648	Rv0648	Alpha-mannosidase	+	2554.61	0.379651	0.115199	3.29561	0.000982068	0.017912	yes	no
fabD2	Rv0649	Possible malonyl CoA-acyl carrier protein transacylase FabD2 (MCT)	+	473.269	0.343392	0.133273	2.57661	0.00997746	0.0881932	no	no
Rv0650	Rv0650	Possible sugar kinase	+	312.059	0.579415	0.216334	2.67834	0.00739885	0.0739688	no	no
rplJ	Rv0651	50S ribosomal protein L10 RplJ	+	7508.12	-0.508061	0.0844562	-6.01567	1.79e-09	1.86e-07	yes	no
rplL	Rv0652	50S ribosomal protein L7/L12 RplL (SA1)	+	5680.85	-0.577697	0.136412	-4.23493	2.29e-05	0.000909388	yes	no
Rv0653c	Rv0653c	Possible transcriptional regulatory protein (probably TetR-family)	-	618.374	0.0662287	0.149105	0.444174	0.656917	0.868533	no	no
Rv0654	Rv0654	Probable dioxygenase	+	3599.22	0.00491665	0.0656917	0.0748443	0.940339	0.980679	no	no
mkl	Rv0655	Possible ribonucleotide-transport ATP-binding protein ABC transporter Mkl	+	33355.2	-0.00794439	0.171439	-0.0463396	0.96304	0.987604	no	no
vapC6	Rv0656c	Possible toxin VapC6	-	318.025	0.0508806	0.202947	0.250709	0.802039	0.938306	no	no
vapB6	Rv0657c	Possible antitoxin VapB6	-	867.611	0.124829	0.129027	0.967467	0.333311	0.658181	no	no
Rv0658c	Rv0658c	Probable conserved integral membrane protein	-	765.796	0.222808	0.132275	1.68443	0.0920991	0.339846	no	no
mazF2	Rv0659c	Toxin MazF2	-	5719.79	0.0865056	0.114757	0.753816	0.45096	0.753413	no	no
mazE2	Rv0660c	Possible antitoxin MazE2	-	4028.27	-0.0234813	0.157366	-0.149214	0.881385	0.966782	no	no
vapC7	Rv0661c	Possible toxin VapC7	-	235.718	0.0135096	0.193985	0.0696427	0.944478	0.983327	no	no
vapB7	Rv0662c	Possible antitoxin VapB7	-	285.336	0.0822253	0.154713	0.53147	0.595093	0.839643	no	no
atsD	Rv0663	Possible arylsulfatase AtsD (aryl-sulfate sulphohydrolase) (arylsulphatase)	+	8512.79	0.055368	0.09276	0.596895	0.550578	0.817233	no	no
vapB8	Rv0664	Possible antitoxin VapB8	+	594.118	0.146192	0.139959	1.04454	0.296236	0.617406	no	no
vapC8	Rv0665	Possible toxin VapC8	+	561.279	0.0806464	0.116319	0.693321	0.488108	0.780389	no	no
Rv0666	Rv0666	Possible membrane protein	+	243.369	-0.0431195	0.202418	-0.213022	0.83131	0.949642	no	no
rpoB	Rv0667	DNA-directed RNA polymerase (beta chain) RpoB (transcriptase beta chain) (RNA polymerase beta subunit)	+	69130.6	-0.29207	0.137068	-2.13085	0.0331016	0.190998	no	no
rpoC	Rv0668	DNA-directed RNA polymerase (beta' chain) RpoC (transcriptase beta' chain) (RNA polymerase beta' subunit).	+	52662	-0.317586	0.106034	-2.99514	0.00274321	0.0368952	yes	no
Rv0669c	Rv0669c	Possible hydrolase	-	7979.77	-0.0559592	0.061553	-0.909123	0.363285	0.682537	no	no
end	Rv0670	Probable endonuclease IV End (endodeoxyribonuclease IV) (apurinase)	+	4963.04	-0.187852	0.0990738	-1.89608	0.0579494	0.263913	no	no
lpqP	Rv0671	Possible conserved lipoprotein LpqP	+	2784.37	0.00613455	0.0779109	0.0787381	0.937241	0.980086	no	no
fadE8	Rv0672	Probable acyl-CoA dehydrogenase FadE8	+	6273.34	0.182866	0.073201	2.49813	0.0124849	0.103505	no	no
echA4	Rv0673	Possible enoyl-CoA hydratase EchA4 (enoyl hydrase) (unsaturated acyl-CoA hydratase) (crotonase)	+	1872.72	0.340983	0.0961889	3.54492	0.000392726	0.00916294	yes	no
Rv0674	Rv0674	Conserved hypothetical protein	+	991.111	0.362468	0.11105	3.264	0.00109851	0.0193742	yes	no
echA5	Rv0675	Probable enoyl-CoA hydratase EchA5 (enoyl hydrase) (unsaturated acyl-CoA hydratase) (crotonase)	+	1370.03	0.426437	0.1536	2.77629	0.00549838	0.0610509	no	no
mmpL5	Rv0676c	Probable conserved transmembrane transport protein MmpL5	-	40547	-0.0964353	0.120038	-0.80337	0.421761	0.726095	no	no
mmpS5	Rv0677c	Possible conserved membrane protein MmpS5	-	9877.14	-0.0734061	0.129587	-0.56646	0.571081	0.8277	no	no
Rv0678	Rv0678	Conserved protein	+	5907.48	0.09001	0.131953	0.682139	0.495151	0.782754	no	no
Rv0679c	Rv0679c	Conserved threonine rich protein	-	3037.66	0.0549197	0.0992261	0.55348	0.579935	0.832758	no	no
Rv0680c	Rv0680c	Probable conserved transmembrane protein	-	1554.42	0.138364	0.153059	0.903987	0.366002	0.683216	no	no
Rv0681	Rv0681	Probable transcriptional regulatory protein (possibly TetR-family)	+	2397.13	0.030139	0.0784792	0.384038	0.70095	0.889933	no	no
rpsL	Rv0682	30S ribosomal protein S12 RpsL	+	9467.35	-0.154598	0.139055	-1.11177	0.266237	0.586572	no	no
rpsG	Rv0683	30S ribosomal protein S7 RpsG	+	14004.7	-0.193967	0.162662	-1.19245	0.233083	0.549208	no	no
fusA1	Rv0684	Probable elongation factor G FusA1 (EF-G)	+	52755.5	-0.158834	0.142925	-1.11131	0.266435	0.586572	no	no
tuf	Rv0685	Probable iron-regulated elongation factor TU Tuf (EF-TU)	+	39632.6	-0.146331	0.155518	-0.94093	0.346741	0.669942	no	no
Rv0686	Rv0686	Probable membrane protein	+	5608.42	0.00808121	0.0677195	0.119334	0.905011	0.972495	no	no
Rv0687	Rv0687	Probable short-chain type dehydrogenase/reductase	+	3131.85	0.107046	0.0981985	1.0901	0.275668	0.594763	no	no
Rv0688	Rv0688	Putative ferredoxin reductase	+	4557.99	0.0585252	0.0794072	0.737026	0.461107	0.761582	no	no
Rv0689c	Rv0689c	Hypothetical protein	-	4.12995	0.712921	1.30227	0.547447	0.584072	0.835122	no	no
Rv0690c	Rv0690c	Conserved hypothetical protein	-	2902.57	-0.154674	0.0744566	-2.07737	0.0377675	0.205536	no	no
Rv0691c	Rv0691c	Probable transcriptional regulatory protein	-	1971.56	-0.226635	0.123663	-1.83267	0.066851	0.28465	no	no
Rv0691A	Rv0691A	Mycofactocin precursor protein	+	2267.01	0.252344	0.17495	1.44237	0.149197	0.439596	no	no
Rv0692	Rv0692	Conserved hypothetical protein	+	5018.7	0.313919	0.124566	2.5201	0.0117321	0.0996958	no	no
pqqE	Rv0693	Probable coenzyme PQQ synthesis protein E PqqE (coenzyme PQQ synthesis protein III)	+	7262.53	0.328175	0.0625469	5.24685	1.55e-07	1.23e-05	yes	no
lldD1	Rv0694	Possible L-lactate dehydrogenase (cytochrome) LldD1	+	6046.05	0.282884	0.0773843	3.65557	0.000256612	0.00675684	yes	no
Rv0695	Rv0695	Conserved hypothetical protein	+	2743.31	0.388481	0.0764376	5.08232	3.73e-07	2.68e-05	yes	no
Rv0696	Rv0696	Probable membrane sugar transferase	+	4064.73	0.45078	0.0703331	6.40921	1.46e-10	1.89e-08	yes	no
Rv0697	Rv0697	Probable dehydrogenase	+	777.25	0.709089	0.135669	5.2266	1.73e-07	1.32e-05	yes	no
Rv0698	Rv0698	Conserved hypothetical protein	+	795.133	0.0810833	0.101715	0.797159	0.425359	0.729297	no	no
Rv0699	Rv0699	Hypothetical protein	+	49.9894	0.11888	0.368332	0.322753	0.746882	0.913508	no	no
rpsJ	Rv0700	30S ribosomal protein S10 RpsJ (transcription antitermination factor NusE)	+	20343.1	-0.294981	0.185599	-1.58934	0.111983	0.378782	no	no
rplC	Rv0701	50S ribosomal protein L3 RplC	+	22702.1	-0.265018	0.14473	-1.83112	0.0670824	0.28465	no	no
rplD	Rv0702	50S ribosomal protein L4 RplD	+	19921.8	-0.335232	0.135574	-2.47268	0.0134106	0.107371	no	no
rplW	Rv0703	50S ribosomal protein L23 RplW	+	14606.8	-0.316354	0.200277	-1.57958	0.114204	0.381939	no	no
rplB	Rv0704	50S ribosomal protein L2 RplB	+	25204	-0.341789	0.153495	-2.22671	0.0259669	0.163177	no	no
rpsS	Rv0705	30S ribosomal protein S19 RpsS	+	11108	-0.33815	0.188161	-1.79713	0.0723156	0.296804	no	no
rplV	Rv0706	50S ribosomal protein L22 RplV	+	10633	-0.406075	0.104843	-3.87316	0.000107432	0.00311385	yes	no
rpsC	Rv0707	30S ribosomal protein S3 RpsC	+	19942.3	-0.308132	0.138369	-2.22689	0.0259546	0.163177	no	no
rplP	Rv0708	50S ribosomal protein L16 RplP	+	12410.8	-0.303723	0.136598	-2.22347	0.0261838	0.163714	no	no
rpmC	Rv0709	50S ribosomal protein L29 RpmC	+	11661.2	-0.302463	0.164141	-1.8427	0.0653732	0.281247	no	no
rpsQ	Rv0710	30S ribosomal protein S17 RpsQ	+	14344.4	-0.346497	0.17466	-1.98383	0.0472746	0.2335	no	no
atsA	Rv0711	Possible arylsulfatase AtsA (aryl-sulfate sulphohydrolase) (arylsulphatase)	+	6179.69	0.204936	0.0887776	2.30842	0.0209755	0.140049	no	no
Rv0712	Rv0712	Conserved protein	+	1700.09	0.241382	0.138756	1.73962	0.0819255	0.317693	no	no
Rv0713	Rv0713	Probable conserved transmembrane protein	+	7809.25	0.0637089	0.0784771	0.811815	0.416898	0.721992	no	no
rplN	Rv0714	50S ribosomal protein L14 RplN	+	11710	-0.204977	0.169857	-1.20677	0.227523	0.540474	no	no
rplX	Rv0715	50S ribosomal protein L24 RplX	+	11051.6	-0.260476	0.153276	-1.69939	0.0892449	0.333638	no	no
rplE	Rv0716	50S ribosomal protein L5 RplE	+	14188.2	-0.286	0.138199	-2.06947	0.0385016	0.207731	no	no
rpsN1	Rv0717	30S ribosomal protein S14 RpsN1	+	7059.12	-0.230451	0.160077	-1.43963	0.149973	0.441053	no	no
rpsH	Rv0718	30S ribosomal protein S8 RpsH	+	9922.81	-0.261016	0.166588	-1.56683	0.117154	0.386617	no	no
rplF	Rv0719	50S ribosomal protein L6 RplF	+	13341	-0.245825	0.132941	-1.84912	0.06444	0.279808	no	no
rplR	Rv0720	50S ribosomal protein L18 RplR	+	7232.08	-0.248673	0.123089	-2.02026	0.0433563	0.220857	no	no
rpsE	Rv0721	30S ribosomal protein S5 RpsE	+	13342	-0.234656	0.123335	-1.90259	0.0570944	0.261131	no	no
rpmD	Rv0722	50S ribosomal protein L30 RpmD	+	3689.8	-0.23321	0.130064	-1.79304	0.0729659	0.29792	no	no
rplO	Rv0723	50S ribosomal protein L15 RplO	+	9318.95	-0.273152	0.167069	-1.63497	0.102055	0.360665	no	no
sppA	Rv0724	Possible protease IV SppA (endopeptidase IV) (signal peptide peptidase)	+	15565.6	-0.0589622	0.0827599	-0.712449	0.476187	0.771891	no	no
Rv0724A	Rv0724A	Conserved hypothetical protein	-	375.866	0.222962	0.153093	1.45638	0.145287	0.434133	no	no
Rv0725c	Rv0725c	Conserved hypothetical protein	-	1302.91	-0.0146891	0.118379	-0.124085	0.901248	0.972495	no	no
Rv0726c	Rv0726c	Possible S-adenosylmethionine-dependent methyltransferase	-	6380.08	-0.118187	0.0645764	-1.83018	0.0672228	0.28465	no	no
fucA	Rv0727c	Possible L-fuculose phosphate aldolase FucA (L-fuculose-1-phosphate aldolase)	-	484.386	0.139351	0.156585	0.889937	0.3735	0.690325	no	no
serA2	Rv0728c	Possible D-3-phosphoglycerate dehydrogenase SerA2 (phosphoglycerate dehydrogenase) (PGDH)	-	390.062	0.385346	0.174658	2.20629	0.0273636	0.169391	no	no
xylB	Rv0729	Possible D-xylulose kinase XylB (xylulokinase) (xylulose kinase)	+	1782.39	-0.047628	0.149807	-0.317929	0.750538	0.914166	no	no
Rv0730	Rv0730	GCN5-related N-acetyltransferase	+	5050.92	0.0448933	0.0973963	0.460934	0.644846	0.861292	no	no
Rv0731c	Rv0731c	Possible S-adenosylmethionine-dependent methyltransferase	-	2022.05	-0.0418823	0.119964	-0.349125	0.726996	0.905174	no	no
secY	Rv0732	Probable preprotein translocase SecY	+	22677.6	-0.219889	0.147926	-1.48648	0.137152	0.423516	no	no
adk	Rv0733	Adenylate kinase Adk (ATP-AMP transphosphorylase)	+	10336.2	-0.178661	0.125536	-1.42319	0.154682	0.445847	no	no
mapA	Rv0734	Methionine aminopeptidase MapA (map) (peptidase M) (MetAP)	+	5721.47	-0.181232	0.0964873	-1.87829	0.0603411	0.270198	no	no
sigL	Rv0735	Probable alternative RNA polymerase sigma factor SigL	+	928.596	-0.0576107	0.0855757	-0.673213	0.500812	0.784472	no	no
rslA	Rv0736	Anti-sigma factor RslA	+	432.905	-0.0124537	0.137384	-0.0906486	0.927772	0.97696	no	no
Rv0737	Rv0737	Possible transcriptional regulatory protein	+	342.278	0.112426	0.138148	0.813813	0.415752	0.721763	no	no
Rv0738	Rv0738	Conserved protein	+	1444.68	0.334495	0.0744143	4.49503	6.96e-06	0.000338058	yes	no
Rv0739	Rv0739	Conserved hypothetical protein	+	1905.52	0.0998255	0.0840756	1.18733	0.235097	0.551807	no	no
Rv0740	Rv0740	Conserved hypothetical protein	+	3559.67	0.152438	0.0690087	2.20897	0.0271767	0.168793	no	no
Rv0743c	Rv0743c	Hypothetical protein	-	1058.56	0.160209	0.101805	1.57368	0.115561	0.384532	no	no
Rv0744c	Rv0744c	Possible transcriptional regulatory protein	-	1082.96	0.11457	0.0793498	1.44386	0.148778	0.438769	no	no
Rv0745	Rv0745	Conserved hypothetical protein	+	28.1468	0.047754	0.486625	0.0981332	0.921827	0.975852	no	no
vapB31	Rv0748	Possible antitoxin VapB31	+	2370.81	-0.0286156	0.134709	-0.212425	0.831775	0.949642	no	no
vapC31	Rv0749	Possible toxin VapC31. Contains PIN domain.	+	1629.51	-0.019841	0.0861218	-0.230383	0.817794	0.945977	no	no
Rv0749A	Rv0749A	Hypothetical protein (fragment)	-	683.307	-0.154686	0.145813	-1.06085	0.288757	0.608947	no	no
Rv0750	Rv0750	Conserved hypothetical protein	+	1280.59	-0.0700498	0.122026	-0.574055	0.565931	0.825601	no	no
mmsB	Rv0751c	Probable 3-hydroxyisobutyrate dehydrogenase MmsB (hibadh)	-	2242.35	-0.0107352	0.0996746	-0.107702	0.914232	0.973878	no	no
fadE9	Rv0752c	Probable acyl-CoA dehydrogenase FadE9	-	2770.7	-0.0180189	0.0981683	-0.183551	0.854365	0.96034	no	no
mmsA	Rv0753c	Probable methylmalonate-semialdehyde dehydrogenase MmsA (methylmalonic acid semialdehyde dehydrogenase) (MMSDH)	-	4243.01	0.0309879	0.086188	0.359539	0.719192	0.899351	no	no
Rv0756c	Rv0756c	Unknown protein	-	2959.09	0.0432316	0.0808218	0.5349	0.592719	0.838037	no	no
phoP	Rv0757	Possible two component system response transcriptional positive regulator PhoP	+	8906.76	-0.0297984	0.161923	-0.184029	0.853991	0.96034	no	no
phoR	Rv0758	Possible two component system response sensor kinase membrane associated PhoR	+	5495.28	0.0952824	0.10129	0.94069	0.346864	0.669942	no	no
Rv0759c	Rv0759c	Conserved hypothetical protein	-	4289.12	-0.0889716	0.123053	-0.723032	0.46966	0.766503	no	no
Rv0760c	Rv0760c	Conserved protein	-	5202.55	-0.0118909	0.113774	-0.104514	0.916762	0.974352	no	no
adhB	Rv0761c	Possible zinc-containing alcohol dehydrogenase NAD dependent AdhB	-	17820	-0.143591	0.111825	-1.28406	0.199119	0.509588	no	no
Rv0762c	Rv0762c	Conserved hypothetical protein	-	1743.65	0.0514303	0.0924047	0.556577	0.577817	0.830625	no	no
Rv0763c	Rv0763c	Possible ferredoxin	-	707.507	0.0260829	0.113116	0.230585	0.817637	0.945977	no	no
cyp51	Rv0764c	Cytochrome P450 51 Cyp51 (CYPL1) (P450-L1A1) (sterol 14-alpha demethylase) (lanosterol 14-alpha demethylase) (P450-14DM)	-	3082.35	0.052122	0.0901846	0.577947	0.5633	0.824658	no	no
Rv0765c	Rv0765c	Probable oxidoreductase	-	1259.91	0.158293	0.113265	1.39754	0.162251	0.457304	no	no
cyp123	Rv0766c	Probable cytochrome P450 123 Cyp123	-	1816.33	-0.0108156	0.101581	-0.106473	0.915207	0.974348	no	no
Rv0767c	Rv0767c	Conserved hypothetical protein	-	776.297	-0.0345664	0.154284	-0.224044	0.822723	0.946802	no	no
aldA	Rv0768	Probable aldehyde dehydrogenase NAD dependent AldA (aldehyde dehydrogenase [NAD+])	+	1896.04	0.0953274	0.10843	0.879159	0.379315	0.695891	no	no
Rv0769	Rv0769	Probable dehydrogenase/reductase	+	1753.63	0.0654696	0.089268	0.733404	0.463312	0.762349	no	no
Rv0770	Rv0770	Probable dehydrogenase/reductase	+	1388.73	0.0645103	0.0976491	0.660634	0.508847	0.791776	no	no
Rv0771	Rv0771	Possible 4-carboxymuconolactone decarboxylase (CMD)	+	715.499	0.0228737	0.100465	0.227679	0.819896	0.945977	no	no
purD	Rv0772	Probable phosphoribosylamine--glycine ligase PurD (GARS) (glycinamide ribonucleotide synthetase) (phosphoribosylglycinamide synthetase) (5'-phosphoribosylglycinamide synthetase)	+	2894.16	0.105756	0.0820083	1.28957	0.197199	0.5061	no	no
ggtA	Rv0773c	Probable bifunctional acylase GgtA: cephalosporin acylase (GL-7ACA acylase) + gamma-glutamyltranspeptidase (GGT)	-	4949.63	-0.0700178	0.0803607	-0.871294	0.383594	0.700321	no	no
Rv0774c	Rv0774c	Probable conserved exported protein	-	2784.38	-0.0709224	0.102722	-0.690434	0.489921	0.780825	no	no
Rv0775	Rv0775	Conserved hypothetical protein	+	1659	0.019857	0.0786806	0.252375	0.800751	0.937385	no	no
Rv0776c	Rv0776c	Conserved hypothetical protein	-	425.019	0.11624	0.126046	0.922203	0.356423	0.676479	no	no
cyp126	Rv0778	Possible cytochrome P450 126 Cyp126	+	5029.16	-0.171494	0.0774014	-2.21564	0.0267161	0.16659	no	no
Rv0779c	Rv0779c	Possible conserved transmembrane protein	-	454.73	-0.12777	0.158541	-0.805915	0.420292	0.725669	no	no
purC	Rv0780	Phosphoribosylaminoimidazole- succinocarboxamide synthase PurC (SAICAR synthetase)	+	3970.64	-0.219394	0.0754019	-2.90967	0.00361816	0.0452451	yes	no
ptrBa	Rv0781	Probable protease II PtrBa [first part] (oligopeptidase B)	+	7320.02	-0.216371	0.0892402	-2.42459	0.0153257	0.114606	no	no
ptrBb	Rv0782	Probable protease II PtrBb [second part] (oligopeptidase B)	+	12952.5	-0.160573	0.0761122	-2.10968	0.0348856	0.197035	no	no
emrB	Rv0783c	Possible multidrug resistance integral membrane efflux protein EmrB	-	5284.8	-0.209689	0.065948	-3.17961	0.00147474	0.0235643	yes	no
Rv0784	Rv0784	Conserved hypothetical protein	+	1046.22	0.035849	0.146561	0.244601	0.806766	0.941478	no	no
Rv0785	Rv0785	Conserved protein	+	4207.15	-0.0958254	0.084941	-1.12814	0.259261	0.578387	no	no
Rv0786c	Rv0786c	Conserved protein	-	795.385	0.071217	0.139606	0.510129	0.609961	0.845936	no	no
Rv0787	Rv0787	Unknown protein	+	775.046	-0.0291127	0.144504	-0.201466	0.840334	0.952701	no	no
Rv0787A	Rv0787A	Conserved protein	+	2539.39	-0.185972	0.103736	-1.79274	0.0730149	0.29792	no	no
purQ	Rv0788	Probable phosphoribosylformylglycinamidine synthase I PURG (FGAM synthase I)	+	3518	-0.242566	0.0774467	-3.13204	0.00173597	0.026711	yes	no
Rv0789c	Rv0789c	Hypothetical protein	-	462.14	0.0172544	0.150121	0.114936	0.908495	0.973415	no	no
Rv0790c	Rv0790c	Hypothetical protein	-	1226.74	0.0623636	0.103675	0.601527	0.547489	0.814561	no	no
Rv0791c	Rv0791c	Conserved protein	-	1326.97	0.131778	0.0995596	1.32361	0.185634	0.488685	no	no
Rv0792c	Rv0792c	Probable transcriptional regulatory protein (probably GntR-family)	-	1051.92	0.0441148	0.136514	0.323152	0.74658	0.913437	no	no
Rv0793	Rv0793	Possible monooxygenase	+	138.568	0.0943265	0.229949	0.410207	0.681654	0.880077	no	no
Rv0794c	Rv0794c	Probable oxidoreductase	-	2617.44	0.103195	0.0977579	1.05562	0.291141	0.611215	no	no
cfp29	Rv0798c	29 KDa antigen CFP29	-	6699.92	-0.0645383	0.0746713	-0.864298	0.387424	0.701491	no	no
Rv0799c	Rv0799c	Conserved protein	-	7420.52	-0.128221	0.066584	-1.9257	0.0541421	0.253999	no	no
pepC	Rv0800	Probable aminopeptidase PepC	+	2628.09	-0.0238662	0.103589	-0.230393	0.817787	0.945977	no	no
Rv0801	Rv0801	Conserved protein	+	1934.76	-0.0139776	0.0826915	-0.169033	0.865771	0.96065	no	no
Rv0802c	Rv0802c	Possible succinyltransferase in the GCN5-related N-acetyltransferase family	-	772.513	-0.0515811	0.123108	-0.418989	0.675224	0.877533	no	no
purL	Rv0803	Phosphoribosylformylglycinamidine synthase II PurL (FGAM synthase II)	+	7421.6	-0.0596772	0.0885005	-0.674315	0.500111	0.784444	no	no
Rv0804	Rv0804	Conserved hypothetical protein	+	1320.46	0.150555	0.11367	1.32449	0.18534	0.488685	no	no
Rv0805	Rv0805	Class III cyclic nucleotide phosphodiesterase (cNMP PDE)	+	16047.9	-0.102154	0.155587	-0.656573	0.511456	0.791777	no	no
cpsY	Rv0806c	Possible UDP-glucose-4-epimerase CpsY (galactowaldenase) (UDP-galactose-4-epimerase) (uridine diphosphate galactose-4-epimerase) (uridine diphospho-galactose-4-epimerase)	-	3269.16	0.124491	0.0910638	1.36708	0.171601	0.470042	no	no
Rv0807	Rv0807	Conserved hypothetical protein	+	343.998	0.141488	0.193056	0.732883	0.46363	0.762349	no	no
purF	Rv0808	Amidophosphoribosyltransferase PurF (glutamine phosphoribosylpyrophosphate amidotransferase) (ATASE) (gpatase)	+	8144.86	0.145057	0.0716486	2.02456	0.0429123	0.219193	no	no
purM	Rv0809	Probable phosphoribosylformylglycinamidine CYCLO-ligase PurM (AIRS) (phosphoribosyl-aminoimidazole synthetase) (air synthase)	+	7422.71	0.0473857	0.103166	0.459315	0.646008	0.861728	no	no
Rv0810c	Rv0810c	Conserved hypothetical protein	-	4964.25	-0.0783275	0.169189	-0.462959	0.643394	0.860698	no	no
Rv0811c	Rv0811c	Conserved protein	-	4624.93	0.00535181	0.0788383	0.0678834	0.945878	0.983493	no	no
Rv0812	Rv0812	Probable amino acid aminotransferase	+	1237.81	0.00860423	0.106292	0.0809488	0.935483	0.980042	no	no
Rv0813c	Rv0813c	Conserved protein	-	3343.72	-0.0711699	0.0760792	-0.935471	0.349545	0.670781	no	no
sseC2	Rv0814c	Conserved protein SseC2	-	3093.07	-0.283385	0.088614	-3.19797	0.00138397	0.0224012	yes	no
cysA2	Rv0815c	Probable thiosulfate sulfurtransferase CysA2 (rhodanese-like protein) (thiosulfate cyanide transsulfurase) (thiosulfate thiotransferase)	-	8795.49	-0.250394	0.111085	-2.25407	0.0241916	0.155417	no	no
thiX	Rv0816c	Probable thioredoxin ThiX	-	493.04	-0.0297485	0.170124	-0.174864	0.861187	0.96065	no	no
Rv0817c	Rv0817c	Probable conserved exported protein	-	1695.88	-0.0885916	0.101962	-0.868868	0.384919	0.700844	no	no
Rv0818	Rv0818	Transcriptional regulatory protein	+	4358.6	0.0150602	0.0884028	0.170359	0.864728	0.96065	no	no
phoT	Rv0820	Probable phosphate-transport ATP-binding protein ABC transporter PhoT	+	2962.58	0.238116	0.105039	2.26693	0.0233942	0.151859	no	no
phoY2	Rv0821c	Probable phosphate-transport system transcriptional regulatory protein PhoY2	-	6226.94	0.0526344	0.0917911	0.573415	0.566364	0.825911	no	no
Rv0822c	Rv0822c	Conserved protein	-	10071.2	-0.138579	0.0659396	-2.10161	0.0355878	0.197716	no	no
Rv0823c	Rv0823c	Possible transcriptional regulatory protein	-	4292.22	-0.24988	0.0608845	-4.10416	4.06e-05	0.00143133	yes	no
desA1	Rv0824c	Probable acyl-[acyl-carrier protein] desaturase DesA1 (acyl-[ACP] desaturase) (stearoyl-ACP desaturase) (protein Des)	-	20069.6	-0.280762	0.142469	-1.97068	0.0487602	0.238281	no	no
Rv0825c	Rv0825c	Conserved protein	-	2415.4	0.214532	0.0829532	2.58618	0.00970466	0.0873479	no	no
kmtR	Rv0827c	Metal sensor transcriptional regulator KmtR (ArsR-SmtB family)	-	589.05	-0.37594	0.150658	-2.49531	0.0125847	0.104102	no	no
Rv0828c	Rv0828c	Possible deaminase	-	121.405	-0.712697	0.272381	-2.61654	0.00888257	0.0825042	no	no
Rv0829	Rv0829	Possible transposase (fragment)	+	297.144	-0.100287	0.163022	-0.615177	0.538438	0.806145	no	no
Rv0830	Rv0830	Possible S-adenosylmethionine-dependent methyltransferase	+	2175.18	-0.0269199	0.0881117	-0.30552	0.75997	0.918184	no	no
Rv0831c	Rv0831c	Conserved protein	-	15508.5	-0.164222	0.155885	-1.05348	0.29212	0.61224	no	no
lpqQ	Rv0835	Possible lipoprotein LpqQ	+	1549.12	0.0757953	0.0957103	0.791924	0.428405	0.731418	no	no
Rv0836c	Rv0836c	Hypothetical protein	-	8511.27	0.0870599	0.132397	0.657569	0.510815	0.791776	no	no
Rv0837c	Rv0837c	Hypothetical protein	-	25540.5	0.00760468	0.203428	0.0373827	0.97018	0.988517	no	no
lpqR	Rv0838	Probable conserved lipoprotein LpqR	+	1033.07	0.190891	0.101393	1.88267	0.0597447	0.268848	no	no
Rv0839	Rv0839	Conserved hypothetical protein	+	1092.43	0.13428	0.150961	0.889504	0.373732	0.690325	no	no
pip	Rv0840c	Probable proline iminopeptidase Pip (prolyl aminopeptidase) (pap)	-	777.665	0.154169	0.147362	1.04619	0.295472	0.616501	no	no
Rv0841	Rv0841	Probable conserved transmembrane protein	+	21.975	0.0636324	0.447168	0.142301	0.886842	0.968131	no	no
Rv0842	Rv0842	Probable conserved integral membrane protein	+	577.679	0.115865	0.128154	0.904106	0.365939	0.683216	no	no
Rv0843	Rv0843	Probable dehydrogenase	+	389.12	0.137673	0.208414	0.660575	0.508885	0.791776	no	no
narL	Rv0844c	Possible nitrate/nitrite response transcriptional regulatory protein NarL	-	2513	0.0395507	0.0738129	0.535823	0.592081	0.837922	no	no
Rv0845	Rv0845	Possible two component sensor kinase	+	2334.26	0.13781	0.0948411	1.45306	0.146208	0.435364	no	no
Rv0846c	Rv0846c	Probable oxidase	-	1907.03	-0.163913	0.118876	-1.37886	0.167938	0.467117	no	no
lpqS	Rv0847	Probable lipoprotein LpqS	+	1134.8	-0.542515	0.12165	-4.45965	8.21e-06	0.000392449	yes	no
cysK2	Rv0848	Possible cysteine synthase a CysK2 (O-acetylserine sulfhydrylase) (O-acetylserine (thiol)-lyase) (CSASE)	+	1212.52	-0.578669	0.133399	-4.33788	1.44e-05	0.000611368	yes	no
Rv0849	Rv0849	Probable conserved integral membrane transport protein	+	732.105	-0.292069	0.141287	-2.0672	0.038715	0.208246	no	no
Rv0851c	Rv0851c	Probable short-chain type dehydrogenase/reductase	-	1107.77	-0.0103992	0.109055	-0.0953568	0.924031	0.976499	no	no
fadD16	Rv0852	Possible fatty-acid-CoA ligase FadD16 (fatty-acid-CoA synthetase) (fatty-acid-CoA synthase)	+	1354.79	0.194382	0.0863636	2.25074	0.0244022	0.155966	no	no
pdc	Rv0853c	Probable pyruvate or indole-3-pyruvate decarboxylase Pdc	-	3936.25	0.106155	0.0830715	1.27787	0.201294	0.511536	no	no
Rv0854	Rv0854	Conserved protein	+	3451.64	0.195355	0.0961042	2.03274	0.0420791	0.217789	no	no
far	Rv0855	Probable fatty-acid-CoA racemase Far	+	2549.93	0.277462	0.0865577	3.20552	0.0013482	0.0219171	yes	no
Rv0856	Rv0856	Conserved hypothetical protein	+	3749.18	0.212977	0.104891	2.03046	0.0423097	0.217885	no	no
Rv0857	Rv0857	Conserved hypothetical protein	+	2778.65	0.223474	0.091544	2.44116	0.01464	0.11277	no	no
dapC	Rv0858c	Probable N-succinyldiaminopimelate aminotransferase DapC (DAP-at)	-	3034.01	-0.116544	0.0680137	-1.71354	0.0866128	0.328111	no	no
fadA	Rv0859	Possible acyl-CoA thiolase FadA	+	7819.26	-0.113431	0.0739291	-1.53432	0.124952	0.403101	no	no
fadB	Rv0860	Probable fatty oxidation protein FadB	+	15479.8	-0.052318	0.0875455	-0.59761	0.5501	0.816849	no	no
ercc3	Rv0861c	DNA helicase Ercc3	-	3992.92	0.0964329	0.0776124	1.24249	0.214054	0.527935	no	no
Rv0862c	Rv0862c	Conserved protein	-	3375.32	0.142019	0.0768099	1.84897	0.0644627	0.279808	no	no
moaC2	Rv0864	Probable molybdenum cofactor biosynthesis protein C 2 MoaC2	+	8102.84	-0.111613	0.110836	-1.00701	0.313929	0.634819	no	no
mog	Rv0865	Probable molybdopterin biosynthesis Mog protein	+	2069.33	-0.0029846	0.0738231	-0.0404291	0.967751	0.988299	no	no
moaE2	Rv0866	Probable molybdenum cofactor biosynthesis protein E2 MoaE2 (molybdopterin converting factor large subunit) (molybdopterin [MPT] converting factor, subunit 2)	+	1125.1	0.175558	0.100346	1.74953	0.0801998	0.313997	no	no
rpfA	Rv0867c	Possible resuscitation-promoting factor RpfA	-	7266.06	-0.186503	0.0768512	-2.42681	0.0152321	0.114508	no	no
moaD2	Rv0868c	Probable molybdenum cofactor biosynthesis protein D 2 MoaD2 (molybdopterin converting factor small subunit) (molybdopterin [MPT] converting factor, subunit 1)	-	2575.57	-0.00717788	0.154795	-0.0463702	0.963015	0.987604	no	no
moaA2	Rv0869c	Probable molybdenum cofactor biosynthesis protein A2 MoaA2	-	3471.68	0.159061	0.0702067	2.26561	0.0234753	0.152043	no	no
Rv0870c	Rv0870c	Possible conserved integral membrane protein	-	2967.91	0.0314546	0.114222	0.275383	0.783022	0.927374	no	no
cspB	Rv0871	Probable cold shock-like protein B CspB	+	4008.71	-0.100077	0.0790522	-1.26596	0.205526	0.518778	no	no
fadE10	Rv0873	Probable acyl-CoA dehydrogenase FadE10	+	17780.8	-0.0350053	0.0824919	-0.424349	0.671311	0.875794	no	no
Rv0874c	Rv0874c	Conserved hypothetical protein	-	553.538	0.25176	0.176162	1.42914	0.152964	0.445265	no	no
Rv0875c	Rv0875c	Possible conserved exported protein	-	1464.77	0.100661	0.100322	1.00338	0.315677	0.636632	no	no
Rv0876c	Rv0876c	Possible conserved transmembrane protein	-	5193.1	0.0899292	0.0701849	1.28132	0.200082	0.511001	no	no
Rv0877	Rv0877	Conserved hypothetical protein	+	4855.7	0.114258	0.0715025	1.59796	0.110052	0.376129	no	no
Rv0879c	Rv0879c	Possible conserved transmembrane protein	-	1660.84	0.0186812	0.116688	0.160095	0.872806	0.963799	no	no
Rv0880	Rv0880	Possible transcriptional regulatory protein (possibly MarR-family)	+	828.015	0.0938302	0.116557	0.805014	0.420812	0.725745	no	no
Rv0881	Rv0881	Possible rRNA methyltransferase (rRNA methylase)	+	1228.52	0.0614971	0.122213	0.503196	0.614826	0.849167	no	no
Rv0882	Rv0882	Probable transmembrane protein	+	555.23	0.0240237	0.144901	0.165794	0.868319	0.961115	no	no
Rv0883c	Rv0883c	Conserved hypothetical protein	-	6937.18	0.00546384	0.127568	0.0428308	0.965836	0.988299	no	no
serC	Rv0884c	Possible phosphoserine aminotransferase SerC (PSAT)	-	4465.1	-0.123583	0.0641682	-1.92592	0.0541144	0.253999	no	no
Rv0885	Rv0885	Conserved hypothetical protein	+	4565.77	0.339612	0.0890308	3.81455	0.000136433	0.00380688	yes	no
fprB	Rv0886	Probable NADPH:adrenodoxin oxidoreductase FprB (adrenodoxin reductase) (AR) (ferredoxin-NADP(+) reductase)	+	2329.61	0.433898	0.103827	4.17903	2.93e-05	0.00111694	yes	no
Rv0887c	Rv0887c	Conserved hypothetical protein	-	633.637	-0.188848	0.114711	-1.6463	0.0997028	0.356054	no	no
Rv0888	Rv0888	Probable exported protein	+	9392.4	0.0458995	0.0645038	0.711578	0.476726	0.771891	no	no
citA	Rv0889c	Probable citrate synthase II CitA	-	4984.96	-0.0211503	0.0679013	-0.311486	0.755432	0.915647	no	no
Rv0890c	Rv0890c	Probable transcriptional regulatory protein (probably LuxR-family)	-	9032.33	-0.235254	0.0662927	-3.54872	0.000387113	0.00910324	yes	no
Rv0891c	Rv0891c	Possible transcriptional regulatory protein	-	3341.69	-0.331591	0.121481	-2.72958	0.00634149	0.0671695	no	no
Rv0892	Rv0892	Probable monooxygenase	+	10887.8	-0.295711	0.0811128	-3.64568	0.000266689	0.0068298	yes	no
Rv0893c	Rv0893c	Possible S-adenosylmethionine-dependent methyltransferase	-	1769.2	-0.17903	0.0900256	-1.98865	0.0467393	0.231775	no	no
Rv0894	Rv0894	Possible transcriptional regulatory protein (possibly LuxR-family)	+	413.667	0.0584547	0.19076	0.30643	0.759277	0.918156	no	no
Rv0895	Rv0895	Possible triacylglycerol synthase (diacylglycerol acyltransferase)	+	621.641	-0.0828459	0.140711	-0.588766	0.556018	0.821105	no	no
gltA2	Rv0896	Probable citrate synthase I GltA2	+	27764	-0.189132	0.182661	-1.03542	0.300471	0.62104	no	no
Rv0897c	Rv0897c	Probable oxidoreductase	-	2483.2	-0.010293	0.0980207	-0.105009	0.916369	0.974348	no	no
Rv0898c	Rv0898c	Conserved hypothetical protein	-	1752.77	-0.16257	0.100667	-1.61493	0.106325	0.369347	no	no
ompA	Rv0899	Outer membrane protein A OmpA	+	3406.4	-0.00281008	0.0833505	-0.033714	0.973105	0.989782	no	no
Rv0900	Rv0900	Possible membrane protein	+	737.345	0.0531573	0.101832	0.522009	0.601664	0.842541	no	no
Rv0901	Rv0901	Possible conserved exported or membrane protein	+	2370.22	0.03783	0.119847	0.315653	0.752266	0.914166	no	no
prrB	Rv0902c	Two component sensor histidine kinase PrrB	-	4781.43	-0.00562314	0.0685502	-0.0820296	0.934623	0.979734	no	no
prrA	Rv0903c	Two component response transcriptional regulatory protein PrrA	-	3403.05	0.0467341	0.0710514	0.65775	0.510699	0.791776	no	no
accD3	Rv0904c	Putative acetyl-coenzyme A carboxylase carboxyl transferase (subunit beta) AccD3 (accase beta chain)	-	1480.75	0.0901462	0.088725	1.01602	0.309621	0.629854	no	no
echA6	Rv0905	Possible enoyl-CoA hydratase EchA6 (enoyl hydrase) (unsaturated acyl-CoA hydratase) (crotonase)	+	3914.01	-0.183087	0.0679569	-2.69416	0.00705659	0.0722866	no	no
Rv0906	Rv0906	Conserved protein	+	3675.7	0.00471483	0.0690248	0.0683062	0.945542	0.983416	no	no
Rv0907	Rv0907	Conserved protein	+	6834.16	0.0144436	0.0730669	0.197677	0.843298	0.953748	no	no
ctpE	Rv0908	Probable metal cation transporter ATPase P-type CtpE	+	7030.02	0.0256959	0.0705548	0.364197	0.715711	0.897098	no	no
Rv0909	Rv0909	Conserved hypothetical protein	+	3936.33	-0.0770584	0.155359	-0.496001	0.619893	0.849763	no	no
Rv0910	Rv0910	Conserved hypothetical protein	+	5466.36	-0.0655303	0.115151	-0.56908	0.569302	0.827291	no	no
Rv0911	Rv0911	Conserved protein	+	2492.4	-0.0471036	0.0829739	-0.567692	0.570244	0.827696	no	no
Rv0912	Rv0912	Probable conserved transmembrane protein	+	1001.14	0.215148	0.100717	2.13616	0.0326668	0.189269	no	no
Rv0913c	Rv0913c	Possible dioxygenase	-	9845.77	0.124541	0.063329	1.96658	0.0492319	0.239069	no	no
Rv0914c	Rv0914c	Possible lipid carrier protein or keto acyl-CoA thiolase	-	4741.62	0.208792	0.0740693	2.81887	0.0048193	0.0559607	no	no
betP	Rv0917	Possible glycine betaine transport integral membrane protein BetP	+	2253.41	0.119434	0.106791	1.11839	0.2634	0.583846	no	no
Rv0918	Rv0918	Conserved protein	+	595.605	-0.0502436	0.0968477	-0.51879	0.603907	0.842541	no	no
Rv0923c	Rv0923c	Conserved hypothetical protein	-	2109.11	0.0403265	0.076307	0.528476	0.597169	0.840941	no	no
mntH	Rv0924c	Divalent cation-transport integral membrane protein MntH (BRAMP) (MRAMP)	-	2981.08	0.0906682	0.0801873	1.13071	0.258179	0.577016	no	no
Rv0925c	Rv0925c	Conserved protein	-	9808.77	-0.0156772	0.100536	-0.155937	0.876083	0.965706	no	no
Rv0926c	Rv0926c	Conserved hypothetical protein	-	4443.27	-0.0671079	0.0672398	-0.998037	0.318261	0.640118	no	no
Rv0927c	Rv0927c	Probable short-chain type dehydrogenase/reductase	-	2290.09	-0.0787705	0.0914039	-0.861786	0.388806	0.701607	no	no
pstS3	Rv0928	Periplasmic phosphate-binding lipoprotein PstS3 (PBP-3) (PstS3) (PHOS1)	+	7735.8	-0.214329	0.104463	-2.05171	0.0401974	0.212621	no	no
pstC2	Rv0929	Phosphate-transport integral membrane ABC transporter PstC2	+	3898.4	-0.0575691	0.0624191	-0.922299	0.356373	0.676479	no	no
pstA1	Rv0930	Probable phosphate-transport integral membrane ABC transporter PstA1	+	3405.45	-0.0663915	0.0820114	-0.80954	0.418205	0.723245	no	no
pknD	Rv0931c	Transmembrane serine/threonine-protein kinase D PknD (protein kinase D) (STPK D)	-	32068.7	-0.0981508	0.126543	-0.775633	0.437966	0.739311	no	no
pstS2	Rv0932c	Periplasmic phosphate-binding lipoprotein PstS2 (PBP-2) (PstS2)	-	31456.5	-0.112296	0.156045	-0.719639	0.471747	0.768233	no	no
pstB	Rv0933	Phosphate-transport ATP-binding protein ABC transporter PstB	+	6877.49	-0.0631285	0.107941	-0.584844	0.558653	0.822285	no	no
pstS1	Rv0934	Periplasmic phosphate-binding lipoprotein PstS1 (PBP-1) (PstS1)	+	13447.9	-0.00784285	0.114042	-0.0687718	0.945171	0.983327	no	no
pstC1	Rv0935	Phosphate-transport integral membrane ABC transporter PstC1	+	6586.97	0.109008	0.115312	0.945329	0.344491	0.668097	no	no
pstA2	Rv0936	Phosphate-transport integral membrane ABC transporter PstA2	+	2593.95	0.289355	0.0914238	3.16499	0.0015509	0.0244676	yes	no
mku	Rv0937c	DNA end-binding protein, Mku	-	4162.9	0.0674027	0.0916431	0.735491	0.462041	0.762349	no	no
ligD	Rv0938	ATP dependent DNA ligase LigD (ATP dependent polydeoxyribonucleotide synthase) (thermostable DNA ligase) (ATP dependent polynucleotide ligase) (sealase) (DNA repair enzyme) (DNA joinase)	+	6726.74	0.14558	0.0822961	1.76898	0.0768971	0.305908	no	no
Rv0939	Rv0939	Possible bifunctional enzyme: 2-hydroxyhepta-2,4-diene-1,7-dioate isomerase (HHDD isomerase) + cyclase/dehydrase	+	6095.55	0.149535	0.0829566	1.80257	0.0714557	0.295545	no	no
Rv0940c	Rv0940c	Possible oxidoreductase	-	3682.34	-0.115862	0.0665056	-1.74214	0.0814842	0.317464	no	no
Rv0941c	Rv0941c	Conserved hypothetical protein	-	2927.03	-0.00380553	0.0744192	-0.0511364	0.959217	0.986677	no	no
Rv0942	Rv0942	Hypothetical protein	+	152.776	0.130109	0.193009	0.674107	0.500243	0.784444	no	no
Rv0943c	Rv0943c	Probable monooxygenase	-	87.2882	0.181416	0.213604	0.849313	0.395707	0.706098	no	no
Rv0944	Rv0944	Possible formamidopyrimidine-DNA glycosylase (FAPY-DNA glycosylase)	+	760.003	-0.0541929	0.126718	-0.427664	0.668896	0.874435	no	no
Rv0945	Rv0945	Probable short-chain type dehydrogenase/reductase	+	3084.77	-0.143987	0.0763804	-1.88514	0.0594114	0.268102	no	no
pgi	Rv0946c	Probable glucose-6-phosphate isomerase Pgi (GPI) (phosphoglucose isomerase) (phosphohexose isomerase) (phi)	-	3435.29	0.0236136	0.0923511	0.255694	0.798187	0.935272	no	no
Rv0947c	Rv0947c	Probable mycolyl transferase, pseudogene	-	301.036	-0.0388739	0.171201	-0.227066	0.820372	0.945977	no	no
Rv0948c	Rv0948c	Chorismate mutase	-	3269.45	-0.13364	0.120103	-1.11272	0.26583	0.586572	no	no
uvrD1	Rv0949	Probable ATP-dependent DNA helicase II UvrD1	+	6309.84	-0.0288272	0.0969914	-0.297214	0.766303	0.919118	no	no
Rv0950c	Rv0950c	Conserved hypothetical protein	-	4863.29	-0.00244634	0.130325	-0.0187711	0.985024	0.995137	no	no
sucC	Rv0951	Probable succinyl-CoA synthetase (beta chain) SucC (SCS-beta)	+	16239	-0.292139	0.10851	-2.69227	0.00709671	0.0723123	no	no
sucD	Rv0952	Probable succinyl-CoA synthetase (alpha chain) SucD (SCS-alpha)	+	14940.6	-0.349923	0.118104	-2.96283	0.00304822	0.0398654	yes	no
Rv0953c	Rv0953c	Possible oxidoreductase	-	912.169	0.146744	0.0868891	1.68886	0.0912455	0.337789	no	no
Rv0954	Rv0954	Probable conserved transmembrane protein	+	12843.1	-0.0466451	0.131818	-0.353859	0.723444	0.902254	no	no
Rv0955	Rv0955	Probable conserved integral membrane protein	+	5756.67	-0.049755	0.072423	-0.687005	0.492079	0.78179	no	no
purN	Rv0956	Probable 5'-phosphoribosylglycinamide formyltransferase PurN (GART) (gar transformylase) (5'-phosphoribosylglycinamide transformylase)	+	3534.65	-0.140487	0.0808949	-1.73666	0.0824471	0.317726	no	no
purH	Rv0957	Probable bifunctional purine biosynthesis protein PurH: phosphoribosylaminoimidazolecarboxamide formyltransferase (AICAR transformylase) (5'-phosphoribosyl-5-aminoimidazole-4-carboxamide formyltransferase) + inosinemonophosphate cyclohydrolase (imp cyclohydrolase) (inosinicase) (imp synthetase) (ATIC)	+	9294.24	-0.154462	0.0628822	-2.45637	0.0140349	0.11013	no	no
Rv0958	Rv0958	Possible magnesium chelatase	+	3870.95	0.0842127	0.0898851	0.936894	0.348813	0.670781	no	no
Rv0959	Rv0959	Conserved hypothetical protein	+	3930.41	0.171356	0.0914145	1.8745	0.0608622	0.270902	no	no
vapB9	Rv0959A	Possible antitoxin VapB9	+	686.401	0.0153788	0.0913846	0.168286	0.866358	0.96065	no	no
vapC9	Rv0960	Possible toxin VapC9	+	1146.75	0.0622393	0.100435	0.619699	0.535456	0.804675	no	no
Rv0961	Rv0961	Probable integral membrane protein	+	993.421	0.155695	0.10961	1.42045	0.155478	0.446449	no	no
lprP	Rv0962c	Possible lipoprotein LprP	-	110.887	0.236858	0.221976	1.06704	0.285952	0.60508	no	no
Rv0963c	Rv0963c	Conserved hypothetical protein	-	440.922	0.00961009	0.181224	0.0530288	0.957709	0.986557	no	no
Rv0964c	Rv0964c	Hypothetical protein	-	554.952	0.0431633	0.159024	0.271426	0.786063	0.928923	no	no
Rv0965c	Rv0965c	Conserved hypothetical protein	-	1714.76	0.10082	0.0743963	1.35517	0.175362	0.474086	no	no
Rv0966c	Rv0966c	Conserved protein	-	4302.83	0.0457915	0.11256	0.406821	0.68414	0.881764	no	no
csoR	Rv0967	Copper-sensitive operon repressor CsoR	+	1255.7	0.394512	0.103882	3.79769	0.000146052	0.00401537	yes	no
Rv0968	Rv0968	Conserved protein	+	1023.43	0.388414	0.1108	3.50553	0.000455697	0.010082	yes	no
ctpV	Rv0969	Probable metal cation transporter P-type ATPase CtpV	+	2597.7	0.414772	0.106793	3.8839	0.000102793	0.00300269	yes	no
Rv0970	Rv0970	Probable conserved integral membrane protein	+	1634.54	0.148781	0.0942825	1.57804	0.114557	0.382777	no	no
echA7	Rv0971c	Probable enoyl-CoA hydratase EchA7 (enoyl hydrase) (unsaturated acyl-CoA hydratase) (crotonase)	-	535.64	-0.143865	0.139181	-1.03366	0.301297	0.622059	no	no
fadE12	Rv0972c	Acyl-CoA dehydrogenase FadE12	-	1519.76	-0.0394427	0.123701	-0.318854	0.749837	0.914166	no	no
accA2	Rv0973c	Probable acetyl-/propionyl-coenzyme A carboxylase alpha chain (alpha subunit) AccA2: biotin carboxylase + biotin carboxyl carrier protein (BCCP)	-	1303.59	0.0941	0.147498	0.637973	0.523491	0.798792	no	no
accD2	Rv0974c	Probable acetyl-/propionyl-CoA carboxylase (beta subunit) AccD2	-	644.186	-0.00696706	0.129743	-0.0536988	0.957175	0.986557	no	no
fadE13	Rv0975c	Probable acyl-CoA dehydrogenase FadE13	-	476.868	0.228407	0.168755	1.35348	0.175901	0.474585	no	no
Rv0976c	Rv0976c	Conserved hypothetical protein	-	657.242	-0.0248815	0.145512	-0.170993	0.86423	0.96065	no	no
Rv0979c	Rv0979c	Hypothetical protein	-	97.4338	0.339251	0.265499	1.27779	0.201325	0.511536	no	no
rpmF	Rv0979A	50S ribosomal protein L32 RpmF	+	3040.78	-0.333885	0.12925	-2.58326	0.00978715	0.0875458	no	no
mprA	Rv0981	Mycobacterial persistence regulator MRPA (two component response transcriptional regulatory protein)	+	2875.1	0.147321	0.0831396	1.77197	0.076399	0.304862	no	no
mprB	Rv0982	Two component sensor kinase MprB	+	6926.9	0.112419	0.0648278	1.73412	0.0828969	0.318786	no	no
pepD	Rv0983	Probable serine protease PepD (serine proteinase) (MTB32B)	+	10996.6	-0.0125112	0.0736764	-0.169813	0.865157	0.96065	no	no
moaB2	Rv0984	Possible pterin-4-alpha-carbinolamine dehydratase MoaB2 (PHS) (4-alpha- hydroxy-tetrahydropterin dehydratase) (pterin-4-a-carbinolamine dehydratase) (phenylalanine hydroxylase-stimulating protein) (PHS) (pterin carbinolamine dehydratase) (PCD)	+	4473.12	-0.0638592	0.0745625	-0.856452	0.391748	0.703393	no	no
mscL	Rv0985c	Possible large-conductance ion mechanosensitive channel MscL	-	2391.78	-0.113665	0.103797	-1.09508	0.273483	0.593472	no	no
Rv0986	Rv0986	Probable adhesion component transport ATP-binding protein ABC transporter	+	3195.68	0.153965	0.112767	1.36534	0.172146	0.470362	no	no
Rv0987	Rv0987	Probable adhesion component transport transmembrane protein ABC transporter	+	9844.83	0.226406	0.100462	2.25364	0.0242185	0.155417	no	no
Rv0988	Rv0988	Possible conserved exported protein	+	4365.04	0.377891	0.106638	3.5437	0.000394553	0.00916294	yes	no
grcC2	Rv0989c	Probable polyprenyl-diphosphate synthase GrcC2 (polyprenyl pyrophosphate synthetase)	-	2360.58	-0.268188	0.100485	-2.66893	0.00760941	0.0750701	no	no
Rv0990c	Rv0990c	Hypothetical protein	-	1066.42	-0.152074	0.105912	-1.43586	0.151042	0.442245	no	no
Rv0991c	Rv0991c	Conserved serine rich protein	-	5332.52	-0.199478	0.136996	-1.45609	0.145369	0.434133	no	no
Rv0992c	Rv0992c	Conserved hypothetical protein	-	1157.06	0.137795	0.0939524	1.46665	0.142472	0.431579	no	no
galU	Rv0993	UTP--glucose-1-phosphate uridylyltransferase GalU (UDP-glucose pyrophosphorylase) (UDPGP) (alpha-D-glucosyl-1-phosphate uridylyltransferase) (uridine diphosphoglucose pyrophosphorylase)	+	4770.52	0.1375	0.0828295	1.66003	0.0969079	0.350424	no	no
moeA1	Rv0994	Probable molybdopterin biosynthesis protein MoeA1	+	6260.62	0.194383	0.0732216	2.65472	0.00793749	0.0772957	no	no
rimJ	Rv0995	Ribosomal-protein-alanine acetyltransferase RimJ (acetylating enzyme for N-terminal of ribosomal protein S5)	+	2139.92	0.230309	0.10728	2.14681	0.0318087	0.187001	no	no
Rv0996	Rv0996	Probable conserved transmembrane protein	+	10690.1	0.181239	0.106681	1.69888	0.089342	0.333638	no	no
Rv0997	Rv0997	Hypothetical protein	+	2477.44	0.140489	0.085333	1.64636	0.0996897	0.356054	no	no
Rv0998	Rv0998	Conserved hypothetical protein	+	1579.97	0.113915	0.0953391	1.19484	0.232151	0.548155	no	no
Rv0999	Rv0999	Unknown protein	+	1948.65	0.15496	0.091567	1.69231	0.0905868	0.33635	no	no
Rv1000c	Rv1000c	Conserved hypothetical protein	-	1630.63	-0.00546199	0.084087	-0.0649565	0.948209	0.984369	no	no
arcA	Rv1001	Probable arginine deiminase ArcA (adi) (ad) (arginine dihydrolase)	+	3362.52	-0.050477	0.0702127	-0.718915	0.472193	0.768624	no	no
Rv1002c	Rv1002c	Conserved membrane protein	-	4127.16	-0.224742	0.0662568	-3.39198	0.000693898	0.0133586	yes	no
Rv1003	Rv1003	Conserved protein	+	1093.49	0.163124	0.105069	1.55254	0.120533	0.393569	no	no
Rv1004c	Rv1004c	Probable membrane protein	-	1346.15	0.263706	0.105504	2.49948	0.0124376	0.103505	no	no
pabB	Rv1005c	Probable para-aminobenzoate synthase component I PABD	-	1204.31	0.117947	0.121644	0.969606	0.332243	0.656584	no	no
Rv1006	Rv1006	Unknown protein	+	13877.8	-0.256147	0.0980012	-2.61371	0.00895654	0.0825143	no	no
metS	Rv1007c	Methionyl-tRNA synthetase MetS (MetRS) (methionine--tRNA ligase)	-	6747.87	-0.192734	0.0622106	-3.09809	0.00194769	0.028671	yes	no
tatD	Rv1008	Probable deoxyribonuclease TatD (YJJV protein)	+	783.413	0.0221712	0.136285	0.162683	0.870768	0.962686	no	no
rpfB	Rv1009	Probable resuscitation-promoting factor RpfB	+	6513.8	0.0203902	0.0640386	0.318405	0.750178	0.914166	no	no
ksgA	Rv1010	Probable dimethyladenosine transferase KsgA (S-adenosylmethionine-6-N', N'-adenosyl(rRNA) dimethyltransferase) (16S rRNA dimethylase) (high level kasugamycin resistance protein KsgA) (kasugamycin dimethyltransferase)	+	3030.87	0.115803	0.0834747	1.38729	0.165354	0.462769	no	no
ispE	Rv1011	Probable 4-diphosphocytidyl-2-C-methyl-D-erythritol kinase IspE (CMK) (4-(cytidine-5'-diphospho)-2-C-methyl-D-erythritol kinase)	+	2197.1	-0.0271557	0.0879918	-0.308617	0.757613	0.916916	no	no
Rv1012	Rv1012	Hypothetical protein	+	270	0.11737	0.190502	0.616106	0.537824	0.806053	no	no
pks16	Rv1013	Putative polyketide synthase Pks16	+	16086.1	-0.529984	0.105453	-5.02578	5.01e-07	3.35e-05	yes	no
pth	Rv1014c	Probable peptidyl-tRNA hydrolase Pth	-	1870.12	-0.281105	0.0873409	-3.21848	0.00128872	0.0214156	yes	no
rplY	Rv1015c	50S ribosomal protein L25 RplY	-	6124.44	-0.275355	0.0783083	-3.51629	0.000437618	0.00979793	yes	no
lpqT	Rv1016c	Probable conserved lipoprotein LpqT	-	6012.31	-0.0897681	0.076879	-1.16765	0.242946	0.559955	no	no
prsA	Rv1017c	Probable ribose-phosphate pyrophosphokinase PrsA (phosphoribosyl pyrophosphate synthetase) (PRPP synthetase)	-	12984.4	-0.0938116	0.125323	-0.748559	0.454123	0.755535	no	no
glmU	Rv1018c	Probable UDP-N-acetylglucosamine pyrophosphorylase GlmU	-	10736.1	-0.0801056	0.0881162	-0.909091	0.363302	0.682537	no	no
Rv1019	Rv1019	Probable transcriptional regulatory protein (probably TetR-family)	+	2004.52	0.0648366	0.0705603	0.918882	0.358157	0.678269	no	no
mfd	Rv1020	Probable transcription-repair coupling factor Mfd (TRCF)	+	7559.76	0.00453169	0.0919111	0.0493052	0.960676	0.986804	no	no
Rv1021	Rv1021	Conserved protein	+	4662.89	-0.0818528	0.0673108	-1.21604	0.223969	0.537496	no	no
lpqU	Rv1022	Probable conserved lipoprotein LpqU	+	2931.26	0.0119785	0.0952286	0.125786	0.899901	0.972454	no	no
eno	Rv1023	Probable enolase Eno	+	10371.1	-0.0191832	0.0772642	-0.248281	0.803917	0.939792	no	no
Rv1024	Rv1024	Possible conserved membrane protein	+	3690.54	-0.128716	0.0617852	-2.08329	0.037225	0.203784	no	no
Rv1025	Rv1025	Conserved protein	+	2099.64	0.0531555	0.0734928	0.723274	0.469511	0.766503	no	no
Rv1026	Rv1026	Conserved protein	+	1679.47	0.0676957	0.13533	0.500229	0.616914	0.849763	no	no
kdpE	Rv1027c	Probable transcriptional regulatory protein KdpE	-	830.192	0.100351	0.115327	0.870142	0.384223	0.700807	no	no
kdpD	Rv1028c	Probable sensor protein KdpD	-	2132.45	0.11305	0.107459	1.05203	0.292785	0.612946	no	no
kdpF	Rv1028A	Probable membrane protein KdpF	+	143.01	-0.126881	0.177382	-0.715296	0.474426	0.771588	no	no
kdpA	Rv1029	Probable potassium-transporting ATPase a chain KdpA (potassium-translocating ATPase a chain) (ATP phosphohydrolase [potassium-transporting] a chain) (potassium binding and translocating subunit A)	+	2107.63	-0.135584	0.0944954	-1.43482	0.151339	0.442421	no	no
kdpB	Rv1030	Probable potassium-transporting P-type ATPase B chain KdpB (potassium-translocating ATPase B chain) (ATP phosphohydrolase [potassium-transporting] B chain) (potassium binding and translocating subunit B)	+	2322.59	0.0107435	0.0953475	0.112678	0.910286	0.973488	no	no
kdpC	Rv1031	Probable potassium-transporting ATPase C chain KdpC (potassium-translocating ATPase C chain) (ATP phosphohydrolase [potassium-transporting] C chain) (potassium binding and translocating subunit C)	+	854.285	-0.0220734	0.0982786	-0.2246	0.82229	0.946802	no	no
trcS	Rv1032c	Two component sensor histidine kinase TrcS	-	1739.54	0.2395	0.0850882	2.81473	0.00488181	0.0565111	no	no
trcR	Rv1033c	Two component transcriptional regulator TrcR	-	1226.22	0.353199	0.081327	4.34295	1.41e-05	0.000611219	yes	no
Rv1036c	Rv1036c	Probable IS1560 transposase (fragment)	-	280.811	0.0552483	0.170266	0.324482	0.745573	0.913101	no	no
esxI	Rv1037c	Putative ESAT-6 like protein EsxI (ESAT-6 like protein 1)	-	1887.63	0.179939	0.107393	1.67552	0.0938329	0.343289	no	no
esxJ	Rv1038c	ESAT-6 like protein EsxJ (ESAT-6 like protein 2)	-	3522.99	0.175388	0.117291	1.49532	0.13483	0.419446	no	no
Rv1043c	Rv1043c	Conserved hypothetical protein	-	1694.87	0.0260716	0.0991816	0.262867	0.792653	0.933368	no	no
Rv1044	Rv1044	Conserved hypothetical protein	+	402.688	0.05036	0.156579	0.321627	0.747735	0.913953	no	no
Rv1045	Rv1045	Hypothetical protein	+	1032.84	-0.0147183	0.118101	-0.124625	0.900821	0.972495	no	no
Rv1046c	Rv1046c	Hypothetical protein	-	7444.58	-0.068752	0.133725	-0.514131	0.60716	0.844873	no	no
Rv1048c	Rv1048c	Hypothetical protein	-	1604.02	0.113723	0.0996023	1.14177	0.253548	0.572474	no	no
Rv1049	Rv1049	Probable transcriptional repressor protein	+	932.552	0.249287	0.0982317	2.53774	0.011157	0.0963417	no	no
Rv1050	Rv1050	Probable oxidoreductase	+	390.879	0.21618	0.182229	1.18631	0.235499	0.552009	no	no
Rv1051c	Rv1051c	Conserved hypothetical protein	-	93.4356	0.0284975	0.355144	0.080242	0.936045	0.980086	no	no
Rv1052	Rv1052	Hypothetical protein	+	1083.3	-0.0746667	0.115387	-0.647096	0.51757	0.796049	no	no
Rv1053c	Rv1053c	Hypothetical protein	-	20.2838	0.188656	0.429815	0.438924	0.660717	0.870042	no	no
Rv1055	Rv1055	Possible integrase (fragment)	+	1156.2	-0.152049	0.101027	-1.50504	0.132313	0.416099	no	no
Rv1056	Rv1056	Conserved protein	+	1363.86	0.0436281	0.0994249	0.438804	0.660803	0.870042	no	no
Rv1057	Rv1057	Conserved hypothetical protein	+	194.761	-0.045245	0.246101	-0.183847	0.854134	0.96034	no	no
fadD14	Rv1058	Probable medium chain fatty-acid-CoA ligase FadD14 (fatty-acid-CoA synthetase) (fatty-acid-CoA synthase)	+	4082.08	0.092384	0.0757048	1.22032	0.222344	0.534972	no	no
Rv1059	Rv1059	Conserved protein	+	4422.14	0.14697	0.0800978	1.83488	0.0665231	0.284263	no	no
Rv1060	Rv1060	Unknown protein	+	2877.09	0.0051928	0.0831577	0.0624452	0.950208	0.984584	no	no
Rv1061	Rv1061	Conserved protein	+	1930.27	-0.107426	0.100441	-1.06954	0.284826	0.604406	no	no
Rv1062	Rv1062	Conserved hypothetical protein	+	553.413	0.111562	0.161326	0.691533	0.489231	0.780389	no	no
Rv1063c	Rv1063c	Conserved hypothetical protein	-	1336.01	0.0688356	0.126484	0.544225	0.586287	0.836384	no	no
lpqV	Rv1064c	Possible lipoprotein LpqV	-	946.603	0.0298653	0.111212	0.268544	0.78828	0.930066	no	no
Rv1065	Rv1065	Conserved hypothetical protein	+	1798.4	-0.0938712	0.0820176	-1.14452	0.252406	0.571275	no	no
Rv1066	Rv1066	Conserved hypothetical protein	+	409.109	0.148275	0.170819	0.868027	0.38538	0.700844	no	no
Rv1069c	Rv1069c	Conserved protein	-	7981.09	-0.083805	0.0679422	-1.23347	0.217399	0.531042	no	no
echA8	Rv1070c	Probable enoyl-CoA hydratase EchA8 (enoyl hydrase) (unsaturated acyl-CoA hydratase) (crotonase)	-	9351.22	-0.232432	0.0853999	-2.7217	0.00649478	0.0684056	no	no
echA9	Rv1071c	Possible enoyl-CoA hydratase EchA9 (enoyl hydrase) (unsaturated acyl-CoA hydratase) (crotonase)	-	6859.39	-0.119789	0.0908161	-1.31903	0.187159	0.491079	no	no
Rv1072	Rv1072	Probable conserved transmembrane protein	+	21560.2	0.0258348	0.177774	0.145323	0.884456	0.967795	no	no
Rv1073	Rv1073	Conserved hypothetical protein	+	6745.55	0.208693	0.101471	2.05669	0.0397165	0.211639	no	no
fadA3	Rv1074c	Probable beta-ketoacyl CoA thiolase FadA3	-	15343.4	-0.0871348	0.13755	-0.633478	0.526421	0.799302	no	no
Rv1075c	Rv1075c	Conserved exported protein	-	2074.36	0.0851082	0.0794782	1.07084	0.284243	0.603775	no	no
lipU	Rv1076	Possible lipase LipU	+	4793.1	0.0947222	0.0725745	1.30517	0.191834	0.497757	no	no
cbs	Rv1077	Probable cystathionine beta-synthase Cbs (serine sulfhydrase) (beta-thionase) (hemoprotein H-450)	+	7981.59	-0.000714976	0.062838	-0.0113781	0.990922	0.997592	no	no
pra	Rv1078	Probable proline-rich antigen homolog Pra	+	18267.9	-0.116944	0.182538	-0.640655	0.521747	0.797551	no	no
metB	Rv1079	Cystathionine gamma-synthase MetB (CGS) (O-succinylhomoserine [thiol]-lyase)	+	9977.27	0.0312566	0.0873935	0.357653	0.720603	0.900513	no	no
greA	Rv1080c	Probable transcription elongation factor GreA (transcript cleavage factor GreA)	-	11505	-0.237371	0.134936	-1.75913	0.0785549	0.310483	no	no
Rv1081c	Rv1081c	Probable conserved membrane protein	-	966.48	0.0882891	0.0816309	1.08156	0.279447	0.598872	no	no
mca	Rv1082	Mycothiol conjugate amidase Mca (mycothiol S-conjugate amidase)	+	4974.03	-0.0990137	0.0765052	-1.29421	0.195593	0.50436	no	no
Rv1083	Rv1083	Conserved hypothetical protein	+	2391.01	-0.0754158	0.0948826	-0.794834	0.42671	0.730245	no	no
Rv1084	Rv1084	Conserved protein	+	2476.51	0.187176	0.099553	1.88017	0.060085	0.269727	no	no
Rv1085c	Rv1085c	Possible hemolysin-like protein	-	3245.6	-0.0685417	0.101059	-0.678237	0.497622	0.782754	no	no
Rv1086	Rv1086	Short (C15) chain Z-isoprenyl diphosphate synthase (Z-FPP synthase) (Z-farnesyl diphosphate synthase) (Z-FPP synthetase) (Z-farnesyl diphosphate synthetase) (geranyltranstransferase) (farnesyl pyrophosphate synthetase)	+	1982.37	-0.00873443	0.0874244	-0.0999084	0.920417	0.975753	no	no
Rv1087A	Rv1087A	Conserved hypothetical protein	+	20.7251	-0.0592516	0.517531	-0.114489	0.90885	0.973415	no	no
celA2a	Rv1089A	Probable cellulase CelA2a (endo-1,4-beta-glucanase) (endoglucanase) (carboxymethyl cellulase)	+	66.1565	-0.225345	0.403523	-0.558444	0.576541	0.830625	no	no
celA2b	Rv1090	Probable cellulase CelA2b (endo-1,4-beta-glucanase) (endoglucanase) (carboxymethyl cellulase)	+	545.973	-0.107183	0.135868	-0.788873	0.430186	0.733121	no	no
coaA	Rv1092c	Probable pantothenate kinase CoaA (pantothenic acid kinase)	-	2466.12	-0.0515649	0.0745525	-0.691659	0.489152	0.780389	no	no
glyA1	Rv1093	Serine hydroxymethyltransferase 1 GlyA1	+	6888.25	-0.196436	0.0847306	-2.31836	0.0204297	0.137882	no	no
desA2	Rv1094	Possible acyl-[acyl-carrier protein] desaturase DesA2 (acyl-[ACP] desaturase) (stearoyl-ACP desaturase)	+	16975.5	-0.404884	0.161621	-2.50515	0.0122401	0.102844	no	no
phoH2	Rv1095	Probable PHOH-like protein PhoH2 (phosphate starvation-inducible protein PSIH)	+	11918.4	0.1888	0.102335	1.84492	0.0650489	0.280854	no	no
Rv1096	Rv1096	Possible glycosyl hydrolase	+	7180.13	-0.151335	0.0835841	-1.81058	0.0702066	0.292972	no	no
Rv1097c	Rv1097c	Probable membrane glycine and proline rich protein	-	9246.27	-0.231358	0.0882152	-2.62265	0.00872487	0.082172	no	no
fum	Rv1098c	Probable fumarase Fum (fumarate hydratase)	-	11134.8	-0.236629	0.0769995	-3.07312	0.0021183	0.0304629	yes	no
Rv1100	Rv1100	Conserved protein	+	2413.68	0.0501527	0.0704514	0.711877	0.476541	0.771891	no	no
Rv1101c	Rv1101c	Conserved membrane protein	-	5383.57	0.104518	0.100825	1.03663	0.299909	0.620222	no	no
mazF3	Rv1102c	Toxin MazF3	-	6164.97	-0.207483	0.127607	-1.62595	0.103961	0.364985	no	no
mazE3	Rv1103c	Possible antitoxin MazE3	-	3966.47	-0.161455	0.1581	-1.02122	0.30715	0.62619	no	no
Rv1104	Rv1104	Possible para-nitrobenzyl esterase (fragment)	+	1697.89	0.0217051	0.0987618	0.219773	0.826048	0.947456	no	no
Rv1105	Rv1105	Possible para-nitrobenzyl esterase (fragment)	+	182.677	0.08037	0.172416	0.46614	0.641115	0.859727	no	no
Rv1106c	Rv1106c	3-beta-hydroxysteroid dehydrogenase	-	4754.88	0.304278	0.0745123	4.08359	4.43e-05	0.00152115	yes	no
xseB	Rv1107c	Probable exodeoxyribonuclease VII (small subunit) XseB (exonuclease VII small subunit)	-	3025.17	0.0956047	0.155464	0.614962	0.53858	0.806145	no	no
xseA	Rv1108c	Probable exodeoxyribonuclease VII (large subunit) XseA (exonuclease VII large subunit)	-	4823.4	0.140025	0.0753438	1.85848	0.0631013	0.277245	no	no
Rv1109c	Rv1109c	Conserved protein	-	12270.5	-0.0636748	0.148291	-0.429392	0.667638	0.874287	no	no
lytB2	Rv1110	Probable LYTB-related protein LytB2	+	4545.07	0.0879982	0.0715001	1.23074	0.21842	0.531254	no	no
Rv1111c	Rv1111c	Conserved hypothetical protein	-	7411.66	-0.232958	0.113952	-2.04436	0.0409177	0.214574	no	no
Rv1112	Rv1112	Probable GTP binding protein	+	1508.97	-0.00871541	0.147827	-0.058957	0.952986	0.98513	no	no
vapB32	Rv1113	Possible antitoxin VapB32	+	1200.38	0.0496389	0.09924	0.500191	0.616941	0.849763	no	no
vapC32	Rv1114	Possible toxin VapC32. Contains PIN domain.	+	1251.18	0.103706	0.113076	0.917135	0.359072	0.678269	no	no
Rv1115	Rv1115	Possible exported protein	+	703.095	0.100213	0.165172	0.606717	0.544039	0.811716	no	no
Rv1116	Rv1116	Hypothetical protein	+	160.787	0.0991843	0.171399	0.578676	0.562808	0.824261	no	no
Rv1116A	Rv1116A	Conserved hypothetical protein (fragment)	-	1362.98	0.0967764	0.090071	1.07445	0.282623	0.601438	no	no
Rv1117	Rv1117	Conserved protein	+	7169.86	-0.0324246	0.164855	-0.196686	0.844073	0.953759	no	no
Rv1118c	Rv1118c	Conserved protein	-	1378.67	0.140005	0.0943421	1.48401	0.137806	0.424779	no	no
Rv1119c	Rv1119c	Hypothetical protein	-	27.1683	0.141395	0.355709	0.397502	0.690997	0.885026	no	no
Rv1120c	Rv1120c	Conserved hypothetical protein	-	152.231	-0.00616316	0.18623	-0.0330944	0.973599	0.989879	no	no
zwf1	Rv1121	Probable glucose-6-phosphate 1-dehydrogenase Zwf1 (G6PD)	+	6531.85	-0.0698632	0.0576542	-1.21176	0.225603	0.539419	no	no
gnd2	Rv1122	Probable 6-phosphogluconate dehydrogenase, decarboxylating Gnd2	+	4465.6	-0.097226	0.0775932	-1.25302	0.210197	0.525353	no	no
bpoB	Rv1123c	Possible peroxidase BpoB (non-haem peroxidase)	-	2805.37	-0.061715	0.0851054	-0.72516	0.468354	0.765673	no	no
ephC	Rv1124	Probable epoxide hydrolase EphC (epoxide hydratase)	+	1134.35	0.0099886	0.0924737	0.108016	0.913983	0.973878	no	no
Rv1125	Rv1125	Conserved hypothetical protein	+	827.49	-0.0680839	0.10337	-0.658643	0.510125	0.791776	no	no
Rv1126c	Rv1126c	Conserved protein	-	2323.12	-0.172039	0.0828266	-2.0771	0.0377924	0.205536	no	no
ppdK	Rv1127c	Probable pyruvate, phosphate dikinase PpdK	-	4673.7	-0.144792	0.0779369	-1.85781	0.0631954	0.277333	no	no
Rv1129c	Rv1129c	Probable transcriptional regulator protein	-	579.392	0.32496	0.131061	2.47946	0.0131583	0.107141	no	no
prpD	Rv1130	Possible methylcitrate dehydratase PrpD	+	1471.5	0.153071	0.116689	1.31179	0.189592	0.494409	no	no
prpC	Rv1131	Probable methylcitrate synthase PrpC	+	1256.63	0.183726	0.113138	1.6239	0.104397	0.366172	no	no
Rv1132	Rv1132	Conserved membrane protein	+	4672.8	-0.211885	0.0634998	-3.33678	0.000847542	0.0158448	yes	no
metE	Rv1133c	Probable 5-methyltetrahydropteroyltriglutamate--homocysteine methyltransferase MetE (methionine synthase, vitamin-B12 independent isozyme)	-	26119.9	-0.108382	0.141262	-0.767239	0.442939	0.745288	no	no
Rv1134	Rv1134	Hypothetical protein	+	172.039	0.421519	0.173507	2.4294	0.0151237	0.114469	no	no
Rv1135A	Rv1135A	Possible acetyl-CoA acetyltransferase (acetoacetyl-CoA thiolase)	+	40.3095	0.10928	0.320483	0.340985	0.733115	0.907278	no	no
Rv1136	Rv1136	Possible enoyl-CoA hydratase	+	583.601	-0.148398	0.137641	-1.07815	0.280965	0.600799	no	no
Rv1137c	Rv1137c	Hypothetical protein	-	314.09	-0.0764486	0.203778	-0.375155	0.707545	0.892547	no	no
Rv1138c	Rv1138c	Possible oxidoreductase	-	964.881	-0.078051	0.106602	-0.73217	0.464065	0.762349	no	no
Rv1139c	Rv1139c	Conserved hypothetical membrane protein	-	891.063	0.112336	0.0885024	1.2693	0.204333	0.516776	no	no
Rv1140	Rv1140	Probable integral membrane protein	+	5375.18	-0.232147	0.0945228	-2.45599	0.0140497	0.11013	no	no
echA11	Rv1141c	Probable enoyl-CoA hydratase EchA11 (enoyl hydrase) (unsaturated acyl-CoA hydratase) (crotonase)	-	2122.85	-0.0636252	0.0744484	-0.85462	0.392761	0.704333	no	no
echA10	Rv1142c	Probable enoyl-CoA hydratase EchA10 (enoyl hydrase) (unsaturated acyl-CoA hydratase) (crotonase)	-	2294.78	0.0210174	0.104876	0.200402	0.841166	0.953192	no	no
mcr	Rv1143	Probable alpha-methylacyl-CoA racemase Mcr (2-methylacyl-CoA racemase) (2-arylpropionyl-CoA epimerase )	+	2438	0.0105877	0.138493	0.0764496	0.939061	0.980648	no	no
Rv1144	Rv1144	Probable short-chain type dehydrogenase/reductase	+	1625.06	-0.165699	0.0985765	-1.68092	0.0927784	0.340697	no	no
mmpL13a	Rv1145	Probable conserved transmembrane transport protein MmpL13a	+	779.816	0.220701	0.12991	1.69888	0.0893421	0.333638	no	no
mmpL13b	Rv1146	Probable conserved transmembrane transport protein MmpL13b	+	1062.91	0.212958	0.108185	1.96847	0.0490144	0.238937	no	no
Rv1147	Rv1147	Conserved protein	+	417.34	0.184222	0.130212	1.41479	0.157131	0.447715	no	no
Rv1150	Rv1150	Possible transposase (fragment)	+	875.129	0.178978	0.150892	1.18613	0.23557	0.552009	no	no
Rv1151c	Rv1151c	Transcriptional regulatory protein	-	1643.86	0.0553893	0.0962969	0.575193	0.56516	0.824799	no	no
Rv1152	Rv1152	Probable transcriptional regulatory protein	+	2313.06	0.0643953	0.0993619	0.648089	0.516928	0.795388	no	no
omt	Rv1153c	Probable O-methyltransferase Omt	-	1529.13	-0.00381833	0.109283	-0.0349398	0.972128	0.989596	no	no
Rv1154c	Rv1154c	Hypothetical protein	-	1273.78	0.173679	0.084555	2.05404	0.0399721	0.211994	no	no
Rv1155	Rv1155	Possible pyridoxamine 5'-phosphate oxidase (PNP/PMP oxidase) (pyridoxinephosphate oxidase) (PNPOX) (pyridoxine 5'-phosphate oxidase)	+	3510.19	0.006183	0.118152	0.0523311	0.958265	0.986557	no	no
Rv1156	Rv1156	Conserved protein	+	8326.18	-0.0910225	0.123444	-0.737357	0.460905	0.761582	no	no
Rv1157c	Rv1157c	Conserved ala-, pro-rich protein	-	9615.22	-0.0932646	0.0906345	-1.02902	0.303471	0.624135	no	no
Rv1158c	Rv1158c	Conserved hypothetical ala-, pro-rich protein	-	8200.99	-0.175549	0.153147	-1.14628	0.251681	0.571017	no	no
pimE	Rv1159	Mannosyltransferase PimE	+	1360.47	0.184204	0.103374	1.78193	0.074761	0.301645	no	no
Rv1159A	Rv1159A	Unknown protein	-	2053.78	0.0188272	0.116716	0.161308	0.871851	0.963313	no	no
mutT2	Rv1160	Probable mutator protein MutT2 (7,8-dihydro-8-oxoguanine-triphosphatase) (8-oxo-dGTPase)	+	1297.08	0.000631196	0.087923	0.00717896	0.994272	0.998753	no	no
narG	Rv1161	Respiratory nitrate reductase (alpha chain) NarG	+	28735.3	0.132163	0.0966397	1.36759	0.171441	0.470042	no	no
narH	Rv1162	Probable respiratory nitrate reductase (beta chain) NarH	+	14077.4	0.143084	0.0775882	1.84414	0.0651623	0.280854	no	no
narJ	Rv1163	Probable respiratory nitrate reductase (delta chain) NarJ	+	1893.23	0.31199	0.0998324	3.12514	0.00177719	0.0267941	yes	no
narI	Rv1164	Probable respiratory nitrate reductase (gamma chain) NarI	+	2197.56	0.208575	0.0896451	2.32668	0.0199823	0.135597	no	no
typA	Rv1165	Possible GTP-binding translation elongation factor TypA (tyrosine phosphorylated protein A) (GTP-binding protein)	+	5479.37	0.0489418	0.0871758	0.561415	0.574514	0.830027	no	no
lpqW	Rv1166	Probable conserved lipoprotein LpqW	+	6556.37	-0.00810176	0.0685442	-0.118198	0.905911	0.972495	no	no
Rv1167c	Rv1167c	Probable transcriptional regulatory protein	-	3098.97	0.0181893	0.0652146	0.278915	0.78031	0.926116	no	no
mshB	Rv1170	N-acetyl-1-D-myo-inosityl-2-amino-2-deoxy-alpha-D-glucopyranoside deacetylase MshB (GlcNAc-Ins deacetylase)	+	2005.23	0.0174454	0.0931377	0.187308	0.85142	0.959162	no	no
Rv1171	Rv1171	Conserved hypothetical protein	+	2137.83	0.451081	0.110023	4.09988	4.13e-05	0.00144446	yes	no
fbiC	Rv1173	Probable F420 biosynthesis protein FbiC	+	16354	0.0178428	0.0776156	0.229887	0.81818	0.945977	no	no
TB8.4	Rv1174c	Low molecular weight T-cell antigen TB8.4	-	9084.32	-0.0518842	0.182055	-0.284993	0.77565	0.92391	no	no
fadH	Rv1175c	Probable NADPH dependent 2,4-dienoyl-CoA reductase FadH (2,4-dienoyl coenzyme A reductase) (4-enoyl-CoA reductase)	-	11114.4	-0.0674596	0.0596593	-1.13075	0.258161	0.577016	no	no
Rv1176c	Rv1176c	Conserved hypothetical protein	-	2121.85	-0.1503	0.074619	-2.01423	0.0439854	0.222848	no	no
fdxC	Rv1177	Probable ferredoxin FdxC	+	6542.21	-0.374844	0.120675	-3.10623	0.00189489	0.0280626	yes	no
Rv1178	Rv1178	Probable aminotransferase	+	4788.64	-0.244744	0.0880959	-2.77815	0.00546689	0.0610509	no	no
Rv1179c	Rv1179c	Unknown protein	-	2970.85	-0.274182	0.114219	-2.40049	0.0163729	0.119102	no	no
pks3	Rv1180	Probable polyketide beta-ketoacyl synthase Pks3	+	3879.65	-0.163579	0.076265	-2.14487	0.0319629	0.187319	no	no
pks4	Rv1181	Probable polyketide beta-ketoacyl synthase Pks4	+	13863.1	-0.196108	0.0729533	-2.68813	0.00718524	0.0725344	no	no
papA3	Rv1182	Probable conserved polyketide synthase associated protein PapA3	+	10249.2	-0.227099	0.0947326	-2.39726	0.0165181	0.119455	no	no
mmpL10	Rv1183	Probable conserved transmembrane transport protein MmpL10	+	7942.32	-0.0383923	0.0724923	-0.529605	0.596386	0.840832	no	no
Rv1184c	Rv1184c	Possible exported protein	-	2831.03	-0.539684	0.0922375	-5.85103	4.89e-09	4.94e-07	yes	no
fadD21	Rv1185c	Probable fatty-acid-AMP ligase FadD21 (fatty-acid-AMP synthetase) (fatty-acid-AMP synthase)	-	19131.7	-0.334406	0.100744	-3.31935	0.000902265	0.0167839	yes	no
Rv1186c	Rv1186c	Conserved protein	-	1035.62	0.0439661	0.166755	0.263656	0.792045	0.933036	no	no
rocA	Rv1187	Probable pyrroline-5-carboxylate dehydrogenase RocA	+	731.153	0.259158	0.11861	2.18496	0.0288916	0.175938	no	no
Rv1188	Rv1188	Probable proline dehydrogenase	+	258.264	0.316985	0.20034	1.58223	0.113597	0.381616	no	no
sigI	Rv1189	Possible alternative RNA polymerase sigma factor SigI	+	334.499	-0.0904323	0.175824	-0.514334	0.607018	0.844873	no	no
Rv1190	Rv1190	Conserved hypothetical protein	+	319.128	0.0115047	0.200923	0.0572594	0.954339	0.9855	no	no
Rv1191	Rv1191	Conserved protein	+	2055.08	-0.000140521	0.075653	-0.00185744	0.998518	0.99932	no	no
Rv1192	Rv1192	Unknown protein	+	6189.87	0.00882902	0.0657948	0.13419	0.893252	0.971135	no	no
fadD36	Rv1193	Probable fatty-acid-CoA ligase FadD36 (fatty-acid-CoA synthetase) (fatty-acid-CoA synthase)	+	3770.82	-0.0490325	0.107946	-0.454233	0.649661	0.864822	no	no
Rv1194c	Rv1194c	Conserved protein	-	7371.78	-0.138791	0.0610595	-2.27304	0.0230236	0.150762	no	no
esxK	Rv1197	ESAT-6 like protein EsxK (ESAT-6 like protein 3)	+	6882.06	0.108587	0.151656	0.716008	0.473986	0.771208	no	no
esxL	Rv1198	Putative ESAT-6 like protein EsxL (ESAT-6 like protein 4)	+	4801.83	0.0126996	0.127304	0.0997579	0.920537	0.975753	no	no
Rv1200	Rv1200	Probable conserved integral membrane transport protein	+	2786.45	-0.0266384	0.0880296	-0.302607	0.762189	0.918789	no	no
dapD	Rv1201c	Tetrahydrodipicolinate N-succinyltransferase DapD	-	8649.97	-0.153762	0.0845686	-1.81819	0.0690347	0.289698	no	no
dapE	Rv1202	Probable succinyl-diaminopimelate desuccinylase DapE	+	2461.6	-0.0623295	0.0922778	-0.675455	0.499387	0.784444	no	no
Rv1203c	Rv1203c	Hypothetical protein	-	414.408	-0.0163113	0.155571	-0.104848	0.916497	0.974348	no	no
Rv1204c	Rv1204c	Conserved hypothetical protein	-	2694.81	-0.0347718	0.084083	-0.413542	0.67921	0.880077	no	no
Rv1205	Rv1205	Conserved hypothetical protein	+	4192.04	0.19623	0.0965507	2.0324	0.0421132	0.217789	no	no
fadD6	Rv1206	Probable fatty-acid-CoA ligase FadD6 (fatty-acid-CoA synthetase) (fatty-acid-CoA synthase)	+	7361.06	0.19417	0.0570507	3.40346	0.000665385	0.0131202	yes	no
folP2	Rv1207	Dihydropteroate synthase 2 FolP2 (DHPS 2) (dihydropteroate pyrophosphorylase 2)	+	4706.46	0.000283193	0.0991677	0.00285569	0.997721	0.999057	no	no
gpgS	Rv1208	Probable glucosyl-3-phosphoglycerate synthase GpgS	+	4539.65	-0.0333315	0.0623443	-0.534636	0.592901	0.838037	no	no
Rv1209	Rv1209	Conserved protein	+	2008.62	-0.0928626	0.0942706	-0.985064	0.324593	0.646936	no	no
tagA	Rv1210	Probable DNA-3-methyladenine glycosylase I TagA (tag I) (3-methyladenine-DNA glycosylase I, constitutive) (DNA-3-methyladenine glycosidase I)	+	3346.16	-0.00676289	0.0832867	-0.0812001	0.935283	0.980042	no	no
Rv1211	Rv1211	Conserved protein	+	7260.59	-0.135302	0.173224	-0.781081	0.434755	0.737983	no	no
glgA	Rv1212c	Putative glycosyl transferase GlgA	-	1361.07	-0.0970153	0.10326	-0.939529	0.347459	0.670015	no	no
glgC	Rv1213	Glucose-1-phosphate adenylyltransferase GlgC (ADP-glucose synthase) (ADP-glucose pyrophosphorylase)	+	4844.37	0.0498642	0.0678551	0.734863	0.462423	0.762349	no	no
Rv1215c	Rv1215c	Conserved protein	-	5384.82	0.0385155	0.0619097	0.622124	0.53386	0.804006	no	no
Rv1216c	Rv1216c	Probable conserved integral membrane protein	-	5108.92	0.177943	0.0831093	2.14107	0.0322685	0.188448	no	no
Rv1217c	Rv1217c	Probable tetronasin-transport integral membrane protein ABC transporter	-	4828.26	0.469683	0.0937471	5.01011	5.44e-07	3.57e-05	yes	no
Rv1218c	Rv1218c	Probable tetronasin-transport ATP-binding protein ABC transporter	-	7392.86	0.29776	0.0720356	4.13351	3.57e-05	0.00129693	yes	no
Rv1220c	Rv1220c	Probable methyltransferase	-	3415.32	0.167259	0.0733507	2.28027	0.0225918	0.148716	no	no
sigE	Rv1221	Alternative RNA polymerase sigma factor SigE	+	6977.61	-0.215123	0.0945776	-2.27456	0.0229321	0.15047	no	no
rseA	Rv1222	Anti-sigma factor RseA	+	5720.16	0.0355842	0.14725	0.241659	0.809044	0.942373	no	no
htrA	Rv1223	Probable serine protease HtrA (DEGP protein)	+	22381.1	-0.0507375	0.121684	-0.41696	0.676708	0.87885	no	no
tatB	Rv1224	Probable protein TatB	+	4618.99	-0.0105988	0.089208	-0.118809	0.905426	0.972495	no	no
Rv1225c	Rv1225c	Conserved hypothetical protein	-	607.811	0.239318	0.117471	2.03725	0.0416253	0.216765	no	no
Rv1226c	Rv1226c	Probable transmembrane protein	-	825.292	0.0912984	0.143273	0.637234	0.523972	0.798792	no	no
Rv1227c	Rv1227c	Probable transmembrane protein	-	531.746	0.0887546	0.155434	0.57101	0.567993	0.826615	no	no
lpqX	Rv1228	Probable lipoprotein LpqX	+	564.28	0.0190811	0.149107	0.127969	0.898173	0.972335	no	no
mrp	Rv1229c	Probable Mrp-related protein Mrp	-	6042.87	-0.0773949	0.0803141	-0.963653	0.33522	0.659678	no	no
Rv1231c	Rv1231c	Probable membrane protein	-	3049.79	-0.0708185	0.0765225	-0.92546	0.354727	0.675661	no	no
Rv1232c	Rv1232c	Conserved protein	-	3229.21	0.00896432	0.0821997	0.109055	0.913158	0.973607	no	no
Rv1233c	Rv1233c	Conserved hypothetical membrane protein	-	6672.1	-0.0866152	0.148411	-0.583615	0.559479	0.822285	no	no
Rv1234	Rv1234	Probable transmembrane protein	+	2543.05	0.0620472	0.067815	0.914947	0.360219	0.679203	no	no
lpqY	Rv1235	Probable sugar-binding lipoprotein LpqY	+	3754.4	0.141166	0.0885573	1.59406	0.110922	0.377332	no	no
sugA	Rv1236	Probable sugar-transport integral membrane protein ABC transporter SugA	+	2803.27	0.15763	0.0718478	2.19394	0.0282394	0.173663	no	no
sugB	Rv1237	Probable sugar-transport integral membrane protein ABC transporter SugB	+	3569.93	0.147635	0.0773271	1.90923	0.0562327	0.258615	no	no
sugC	Rv1238	Probable sugar-transport ATP-binding protein ABC transporter SugC	+	10153.8	-0.0166524	0.0918009	-0.181397	0.856056	0.96065	no	no
corA	Rv1239c	Possible magnesium and cobalt transport transmembrane protein CorA	-	3343.57	-0.0980796	0.0787899	-1.24482	0.213196	0.526933	no	no
mdh	Rv1240	Probable malate dehydrogenase Mdh	+	12429.7	-0.190936	0.0956007	-1.99722	0.0458011	0.229037	no	no
vapB33	Rv1241	Possible antitoxin VapB33	+	3538.35	-0.142201	0.10382	-1.36969	0.170783	0.469182	no	no
vapC33	Rv1242	Possible toxin VapC33. Contains PIN domain.	+	3301.79	-0.166484	0.0795271	-2.09342	0.0363115	0.200841	no	no
lpqZ	Rv1244	Probable lipoprotein LpqZ	+	2166.04	-0.0170803	0.082496	-0.207044	0.835976	0.951511	no	no
Rv1245c	Rv1245c	Probable short-chain type dehydrogenase/reductase	-	2500.18	0.0959208	0.0950279	1.0094	0.312785	0.633348	no	no
relE	Rv1246c	Toxin RelE	-	1777.19	0.00652028	0.0855583	0.0762087	0.939253	0.980648	no	no
relB	Rv1247c	Antitoxin RelB	-	3210.63	-0.050397	0.0926207	-0.544123	0.586357	0.836384	no	no
Rv1248c	Rv1248c	Multifunctional alpha-ketoglutarate metabolic enzyme	-	28858.1	0.0292901	0.0730795	0.400798	0.688569	0.884037	no	no
Rv1249c	Rv1249c	Possible membrane protein	-	2942.94	-0.00534566	0.0821864	-0.065043	0.94814	0.984369	no	no
Rv1250	Rv1250	Probable drug-transport integral membrane protein	+	1904.29	0.0454663	0.100409	0.452809	0.650686	0.864883	no	no
lprE	Rv1252c	Probable lipoprotein LprE	-	2760.04	0.40898	0.0835978	4.89223	9.97e-07	6.01e-05	yes	no
deaD	Rv1253	Probable cold-shock DeaD-box protein A homolog DeaD (ATP-dependent RNA helicase dead homolog)	+	5774.64	-0.0904362	0.0848	-1.06647	0.286213	0.60529	no	no
Rv1254	Rv1254	Probable acyltransferase	+	4256.16	-0.0215038	0.0753666	-0.285323	0.775397	0.92391	no	no
Rv1255c	Rv1255c	Probable transcriptional regulatory protein	-	563.529	-0.12761	0.146786	-0.869361	0.38465	0.700844	no	no
cyp130	Rv1256c	Probable cytochrome P450 130 Cyp130	-	988.219	-0.0248279	0.147443	-0.16839	0.866277	0.96065	no	no
Rv1257c	Rv1257c	Probable oxidoreductase	-	5509.89	-0.147752	0.0758136	-1.94888	0.0513092	0.246986	no	no
Rv1258c	Rv1258c	Probable conserved integral membrane transport protein	-	2162.94	-0.276242	0.0906923	-3.04593	0.00231965	0.032729	yes	no
udgB	Rv1259	Probable uracil DNA glycosylase, UdgB	+	930.778	-0.0404359	0.107096	-0.377567	0.705752	0.891852	no	no
Rv1260	Rv1260	Probable oxidoreductase	+	8169.53	-0.20354	0.0933819	-2.17966	0.029283	0.177577	no	no
Rv1261c	Rv1261c	Conserved protein	-	4642.57	-0.0613801	0.0987567	-0.621528	0.534252	0.804006	no	no
Rv1262c	Rv1262c	Hypothetical hit-like protein	-	2202.66	-0.16511	0.089122	-1.85262	0.0639364	0.278738	no	no
amiB2	Rv1263	Probable amidase AmiB2 (aminohydrolase)	+	1670.64	-0.0163805	0.120601	-0.135823	0.891961	0.970618	no	no
Rv1264	Rv1264	Adenylyl cyclase (ATP pyrophosphate-lyase) (adenylate cyclase)	+	4875.98	-0.0437536	0.0824289	-0.530804	0.595555	0.839977	no	no
Rv1265	Rv1265	Unknown protein	+	5561.26	-0.164265	0.111222	-1.47691	0.139699	0.426309	no	no
pknH	Rv1266c	Probable transmembrane serine/threonine-protein kinase H PknH (protein kinase H) (STPK H)	-	7195.37	0.0530177	0.0710485	0.746218	0.455536	0.756326	no	no
embR	Rv1267c	Probable transcriptional regulatory protein EmbR	-	2427.46	0.0955163	0.0939365	1.01682	0.30924	0.629422	no	no
Rv1268c	Rv1268c	Hypothetical protein	-	648.164	0.201954	0.104024	1.94142	0.0522073	0.24994	no	no
Rv1269c	Rv1269c	Conserved probable secreted protein	-	2437.83	0.189708	0.111953	1.69453	0.0901644	0.335114	no	no
lprA	Rv1270c	Possible lipoprotein LprA	-	6679.66	-0.00173662	0.103095	-0.016845	0.98656	0.995833	no	no
Rv1271c	Rv1271c	Conserved hypothetical secreted protein	-	1111.6	-0.0587039	0.103919	-0.564899	0.572143	0.82788	no	no
Rv1272c	Rv1272c	Probable drugs-transport transmembrane ATP-binding protein ABC transporter	-	3294.14	0.157316	0.0915209	1.71891	0.0856313	0.325051	no	no
Rv1273c	Rv1273c	Probable drugs-transport transmembrane ATP-binding protein ABC transporter	-	2258.82	0.16394	0.119617	1.37054	0.170517	0.469182	no	no
lprB	Rv1274	Possible lipoprotein LprB	+	6163.49	-0.12911	0.0898115	-1.43757	0.150557	0.441515	no	no
lprC	Rv1275	Possible lipoprotein LprC	+	5780.78	-0.0418092	0.0839978	-0.497741	0.618666	0.849763	no	no
Rv1276c	Rv1276c	Conserved hypothetical protein	-	473.329	0.164333	0.19703	0.834052	0.404251	0.712554	no	no
Rv1277	Rv1277	Conserved hypothetical protein	+	4524.8	0.0652941	0.0694969	0.939524	0.347462	0.670015	no	no
Rv1278	Rv1278	Hypothetical protein	+	8164.29	0.136654	0.069332	1.97101	0.0487222	0.238281	no	no
Rv1279	Rv1279	Probable dehydrogenase FAD flavoprotein GMC oxidoreductase	+	8268.9	0.113414	0.0689395	1.64512	0.0999459	0.356582	no	no
oppA	Rv1280c	Probable periplasmic oligopeptide-binding lipoprotein OppA	-	10081.7	-0.106127	0.0703751	-1.50802	0.131549	0.416099	no	no
oppD	Rv1281c	Probable oligopeptide-transport ATP-binding protein ABC transporter OppD	-	5071.48	-0.157162	0.0641537	-2.44978	0.0142945	0.111189	no	no
oppC	Rv1282c	Probable oligopeptide-transport integral membrane protein ABC transporter OppC	-	3366.93	-0.147266	0.072571	-2.02927	0.0424309	0.217885	no	no
oppB	Rv1283c	Probable oligopeptide-transport integral membrane protein ABC transporter OppB	-	3035.16	-0.156184	0.0753577	-2.07256	0.038213	0.20707	no	no
canA	Rv1284	Beta-carbonic anhydrase	+	2583.85	0.0472321	0.0908585	0.519843	0.603173	0.842541	no	no
cysD	Rv1285	Probable sulfate adenylyltransferase subunit 2 CysD	+	1591.75	-0.134194	0.119449	-1.12344	0.261249	0.580744	no	no
cysN	Rv1286	Probable bifunctional enzyme CysN/CysC: sulfate adenyltransferase (subunit 1) + adenylylsulfate kinase	+	5652.43	-0.290111	0.0683978	-4.24153	2.22e-05	0.000892537	yes	no
Rv1287	Rv1287	Conserved hypothetical protein	+	2253.37	-0.189353	0.0753649	-2.51248	0.0119886	0.101415	no	no
Rv1288	Rv1288	Conserved protein	+	1915.77	-0.0407669	0.101687	-0.400906	0.688489	0.884037	no	no
Rv1289	Rv1289	Unknown protein	+	2429.54	-0.0680743	0.0864006	-0.787892	0.43076	0.733763	no	no
Rv1290c	Rv1290c	Conserved protein	-	1275.4	0.0754228	0.135401	0.557034	0.577504	0.830625	no	no
Rv1290A	Rv1290A	Hypothetical protein	+	57.1426	0.278799	0.304287	0.916238	0.359542	0.678269	no	no
Rv1291c	Rv1291c	Conserved hypothetical secreted protein	-	63.8736	0.107347	0.288972	0.371481	0.710279	0.894524	no	no
argS	Rv1292	Probable arginyl-tRNA synthetase ArgS (ARGRS) (arginine--tRNA ligase)	+	7694.65	-0.309767	0.0681384	-4.54614	5.46e-06	0.000279849	yes	no
lysA	Rv1293	Diaminopimelate decarboxylase LysA (DAP decarboxylase)	+	7253.86	-0.235672	0.0656905	-3.58761	0.000333718	0.00805015	yes	no
thrA	Rv1294	Probable homoserine dehydrogenase ThrA	+	9237.15	-0.266382	0.0709266	-3.75574	0.000172828	0.00468264	yes	no
thrC	Rv1295	Threonine synthase ThrC (ts)	+	5872.56	-0.146815	0.0595824	-2.46407	0.0137371	0.109283	no	no
thrB	Rv1296	Probable homoserine kinase ThrB	+	2768.32	-0.145157	0.0734087	-1.97738	0.0479982	0.23645	no	no
rho	Rv1297	Probable transcription termination factor Rho homolog	+	36493.8	-0.118349	0.141	-0.839354	0.401271	0.71041	no	no
rpmE	Rv1298	50S ribosomal protein L31 RpmE	+	7596.42	-0.109891	0.176014	-0.624332	0.532409	0.803017	no	no
prfA	Rv1299	Probable peptide chain release factor 1 PrfA (RF-1)	+	5955.93	-0.126801	0.063884	-1.98486	0.0471596	0.23324	no	no
hemK	Rv1300	Probable HemK protein homolog HemK	+	5870.88	-0.122034	0.0792612	-1.53964	0.123647	0.399928	no	no
Rv1301	Rv1301	Conserved protein	+	3461.57	-0.158252	0.0722045	-2.19172	0.0283996	0.173673	no	no
rfe	Rv1302	Probable undecapaprenyl-phosphate alpha-N-acetylglucosaminyltransferase Rfe (UDP-GlcNAc transferase)	+	2360.76	0.0657423	0.083298	0.789242	0.429971	0.733087	no	no
Rv1303	Rv1303	Conserved hypothetical transmembrane protein	+	4798	0.0198682	0.0936844	0.212076	0.832048	0.949642	no	no
atpB	Rv1304	Probable ATP synthase a chain AtpB (protein 6)	+	11556.5	-0.186577	0.14473	-1.28914	0.197351	0.5061	no	no
atpE	Rv1305	Probable ATP synthase C chain AtpE (lipid-binding protein) (dicyclohexylcarbodiimide-binding protein)	+	8558.81	-0.157279	0.176936	-0.8889	0.374057	0.690325	no	no
atpF	Rv1306	Probable ATP synthase B chain AtpF	+	18436.6	-0.254972	0.146763	-1.7373	0.0823335	0.317693	no	no
atpH	Rv1307	Probable ATP synthase delta chain AtpH	+	25804.8	-0.237962	0.136845	-1.73892	0.0820493	0.317693	no	no
atpA	Rv1308	Probable ATP synthase alpha chain AtpA	+	35219.2	-0.216652	0.138203	-1.56763	0.116968	0.386617	no	no
atpG	Rv1309	Probable ATP synthase gamma chain AtpG	+	19867.2	-0.184401	0.136039	-1.3555	0.175258	0.474086	no	no
atpD	Rv1310	Probable ATP synthase beta chain AtpD	+	26091.2	-0.087379	0.143319	-0.609681	0.542073	0.809886	no	no
atpC	Rv1311	Probable ATP synthase epsilon chain AtpC	+	6353.92	-0.0135664	0.150878	-0.0899158	0.928354	0.97696	no	no
Rv1312	Rv1312	Conserved hypothetical secreted protein	+	3668.88	0.138135	0.0740813	1.86464	0.0622312	0.27439	no	no
Rv1314c	Rv1314c	Conserved protein	-	1692.83	0.123642	0.0984612	1.25574	0.20921	0.523685	no	no
murA	Rv1315	Probable UDP-N-acetylglucosamine 1-carboxyvinyltransferase MurA	+	6500.01	-0.0493317	0.0740513	-0.666182	0.505295	0.788851	no	no
ogt	Rv1316c	Methylated-DNA--protein-cysteine methyltransferase Ogt (6-O-methylguanine-DNA methyltransferase) (O-6-methylguanine-DNA-alkyltransferase)	-	2010.08	0.102011	0.0990833	1.02954	0.303224	0.624135	no	no
alkA	Rv1317c	Probable bifunctional regulatory protein and DNA repair enzyme AlkA (regulatory protein of adaptative response) (methylphosphotriester-DNA--protein-cysteine S-methyltransferase)	-	1410.83	0.11015	0.117489	0.937532	0.348485	0.670605	no	no
Rv1318c	Rv1318c	Possible adenylate cyclase (ATP pyrophosphate-lyase) (adenylyl cyclase)	-	2268.69	0.301835	0.115143	2.62138	0.00875739	0.082271	no	no
Rv1319c	Rv1319c	Possible adenylate cyclase (ATP pyrophosphate-lyase) (adenylyl cyclase)	-	3831.16	0.118534	0.0860094	1.37815	0.168157	0.467117	no	no
Rv1320c	Rv1320c	Possible adenylate cyclase (ATP pyrophosphate-lyase) (adenylyl cyclase)	-	9011.39	0.149738	0.0629687	2.37798	0.0174077	0.122575	no	no
Rv1321	Rv1321	Conserved hypothetical protein	+	4487.1	0.0554367	0.0883606	0.627391	0.530403	0.801283	no	no
Rv1322	Rv1322	Conserved hypothetical protein	+	1982.21	-0.109909	0.122909	-0.894233	0.371197	0.687352	no	no
Rv1322A	Rv1322A	Conserved protein	-	13735.5	-0.114254	0.185526	-0.61584	0.538	0.806053	no	no
fadA4	Rv1323	Probable acetyl-CoA acetyltransferase FadA4 (acetoacetyl-CoA thiolase)	+	17511.1	-0.0471461	0.104807	-0.449839	0.652827	0.866176	no	no
Rv1324	Rv1324	Possible thioredoxin	+	9689.15	-0.226982	0.107065	-2.12004	0.034003	0.193676	no	no
glgB	Rv1326c	1,4-alpha-glucan branching enzyme GlgB (glycogen branching enzyme)	-	10067	-0.0973464	0.0621229	-1.567	0.117115	0.386617	no	no
glgE	Rv1327c	Probable glucanase GlgE	-	12576.4	-0.138498	0.0736851	-1.87959	0.0601638	0.269727	no	no
glgP	Rv1328	Probable glycogen phosphorylase GlgP	+	13342.5	-0.21046	0.0605223	-3.4774	0.000506305	0.0109426	yes	no
dinG	Rv1329c	Probable ATP-dependent helicase DinG	-	2288.41	0.0139012	0.114014	0.121925	0.902958	0.972495	no	no
pncB1	Rv1330c	Nicotinic acid phosphoribosyltransferase PncB1	-	1675.04	0.0343098	0.0937441	0.365995	0.714369	0.896318	no	no
Rv1331	Rv1331	Conserved hypothetical protein	+	4692.04	-0.0844713	0.160058	-0.527756	0.597669	0.840941	no	no
Rv1332	Rv1332	Probable transcriptional regulatory protein	+	7317.11	-0.163662	0.120548	-1.35764	0.174577	0.474086	no	no
Rv1333	Rv1333	Probable hydrolase	+	3578.72	-0.105581	0.090571	-1.16573	0.243725	0.560793	no	no
mec	Rv1334	Possible hydrolase	+	4306.92	-0.216357	0.093634	-2.31067	0.0208509	0.139716	no	no
cysO	Rv1335	Sulfur carrier protein CysO	+	2857.59	-0.159378	0.103646	-1.53771	0.12412	0.401111	no	no
cysM	Rv1336	Cysteine synthase B CysM (CSASE B) (O-phosphoserine sulfhydrylase B) (O-phosphoserine (thiol)-lyase B)	+	7337.78	-0.10039	0.104116	-0.964211	0.33494	0.659474	no	no
Rv1337	Rv1337	Probable integral membrane protein	+	5635.87	0.034499	0.0891205	0.387105	0.698678	0.889067	no	no
murI	Rv1338	Probable glutamate racemase MurI	+	2821.13	-0.0204254	0.0723857	-0.282175	0.77781	0.92501	no	no
Rv1339	Rv1339	Conserved protein	+	5246.77	-0.0793455	0.0899481	-0.882126	0.377709	0.69423	no	no
rphA	Rv1340	Probable ribonuclease RphA (RNase PH) (tRNA nucleotidyltransferase)	+	5091.63	-0.0976389	0.0834562	-1.16994	0.242024	0.559634	no	no
Rv1341	Rv1341	Conserved protein	+	1807.9	-0.0082345	0.0915875	-0.0899086	0.92836	0.97696	no	no
Rv1342c	Rv1342c	Conserved membrane protein	-	1166.89	-0.215403	0.078063	-2.75935	0.00579169	0.0635048	no	no
mbtL	Rv1344	Acyl carrier protein (ACP) MbtL	+	772.181	0.0675168	0.107405	0.62862	0.529598	0.80077	no	no
mbtM	Rv1345	Probable fatty acyl-AMP ligase MbtM	+	2916.94	0.0583579	0.101424	0.575387	0.565029	0.824799	no	no
mbtN	Rv1346	Acyl-CoA dehydrogenase MbtN	+	3667.22	0.0224516	0.0690585	0.32511	0.745098	0.912981	no	no
mbtK	Rv1347c	Lysine N-acetyltransferase MbtK	-	900.435	0.333732	0.116944	2.85378	0.0043202	0.0516077	no	no
irtA	Rv1348	Iron-regulated transporter IrtA	+	1600.88	-0.0929052	0.147	-0.632008	0.527381	0.799302	no	no
irtB	Rv1349	Iron-regulated transporter IrtB	+	705.664	0.099493	0.159192	0.624987	0.531979	0.802692	no	no
fabG2	Rv1350	Probable 3-oxoacyl-[acyl-carrier protein] reductase FabG2 (3-ketoacyl-acyl carrier protein reductase)	+	1387.98	-0.209141	0.12685	-1.64872	0.0992051	0.354955	no	no
Rv1351	Rv1351	Hypothetical protein	+	1573.86	-0.210646	0.0859666	-2.45033	0.0142726	0.111189	no	no
Rv1352	Rv1352	Conserved protein	+	2468.63	0.112299	0.150879	0.744303	0.456693	0.757912	no	no
Rv1353c	Rv1353c	Probable transcriptional regulatory protein	-	470.403	0.0238563	0.135717	0.17578	0.860467	0.96065	no	no
Rv1354c	Rv1354c	Conserved hypothetical protein	-	1284.44	-0.143505	0.112112	-1.28001	0.200541	0.511536	no	no
moeY	Rv1355c	Possible molybdopterin biosynthesis protein MoeY	-	875.844	0.0243396	0.139287	0.174745	0.86128	0.96065	no	no
Rv1356c	Rv1356c	Hypothetical protein	-	252.71	0.375189	0.17089	2.19551	0.0281272	0.173258	no	no
Rv1357c	Rv1357c	Conserved hypothetical protein	-	68.1813	-0.0955357	0.430815	-0.221756	0.824504	0.947456	no	no
Rv1358	Rv1358	Probable transcriptional regulatory protein	+	1174.91	0.123063	0.163026	0.754867	0.450329	0.753256	no	no
Rv1359	Rv1359	Probable transcriptional regulatory protein	+	408.82	0.0704454	0.148938	0.472985	0.636224	0.856931	no	no
Rv1360	Rv1360	Probable oxidoreductase	+	5666.62	-0.113553	0.0735339	-1.54423	0.122533	0.396667	no	no
Rv1362c	Rv1362c	Possible membrane protein	-	4212.51	0.075305	0.0710179	1.06037	0.288978	0.609069	no	no
Rv1363c	Rv1363c	Possible membrane protein	-	7683.8	-0.0563579	0.115247	-0.48902	0.624827	0.85028	no	no
Rv1364c	Rv1364c	Possible sigma factor regulatory protein	-	5105.78	0.071735	0.0645286	1.11168	0.266277	0.586572	no	no
rsfA	Rv1365c	Anti-anti-sigma factor RsfA (anti-sigma factor antagonist) (regulator of sigma F A)	-	1421.72	0.256133	0.0891302	2.87369	0.00405701	0.0492506	yes	no
Rv1366	Rv1366	Hypothetical protein	+	1921.86	0.0063111	0.0977327	0.0645751	0.948512	0.984369	no	no
Rv1366A	Rv1366A	Conserved protein	+	1489.82	0.0401616	0.0838848	0.47877	0.632102	0.855076	no	no
Rv1367c	Rv1367c	Conserved protein	-	1951.23	-0.027121	0.0967811	-0.28023	0.779301	0.925312	no	no
lprF	Rv1368	Probable conserved lipoprotein LprF	+	4804.84	0.345558	0.0768787	4.49485	6.96e-06	0.000338058	yes	no
Rv1371	Rv1371	Probable conserved membrane protein	+	1888.63	0.605577	0.0974648	6.21328	5.19e-10	5.88e-08	yes	no
Rv1372	Rv1372	Conserved hypothetical protein	+	2310.5	0.273833	0.0805022	3.40156	0.000670022	0.0131202	yes	no
Rv1373	Rv1373	Glycolipid sulfotransferase	+	2698.66	0.151585	0.0942827	1.60777	0.107885	0.372361	no	no
Rv1374c	Rv1374c	Hypothetical protein	-	256.713	0.0353471	0.230434	0.153393	0.878088	0.966491	no	no
Rv1375	Rv1375	Conserved hypothetical protein	+	2501.28	0.0641061	0.0983237	0.65199	0.514407	0.794781	no	no
Rv1376	Rv1376	Conserved hypothetical protein	+	1383	0.0460566	0.110696	0.416062	0.677364	0.87914	no	no
Rv1377c	Rv1377c	Putative transferase	-	1810.98	0.0445448	0.096715	0.460578	0.645102	0.861292	no	no
Rv1378c	Rv1378c	Conserved hypothetical protein	-	2795.47	0.309209	0.0942455	3.28089	0.0010348	0.0185125	yes	no
pyrR	Rv1379	Probable pyrimidine operon regulatory protein PyrR	+	2684.3	-0.148578	0.102519	-1.44927	0.147263	0.436305	no	no
pyrB	Rv1380	Probable aspartate carbamoyltransferase PyrB (ATCase) (aspartate transcarbamylase)	+	1558.34	-0.140368	0.119466	-1.17497	0.240008	0.557039	no	no
pyrC	Rv1381	Probable dihydroorotase PyrC (DHOase)	+	3374.61	0.0329508	0.0962278	0.342425	0.732031	0.907206	no	no
Rv1382	Rv1382	Probable export or membrane protein	+	1401.31	0.199807	0.0889594	2.24604	0.0247012	0.157339	no	no
carA	Rv1383	Probable carbamoyl-phosphate synthase small chain CarA (carbamoyl-phosphate synthetase glutamine chain)	+	2771.48	0.113129	0.0708338	1.59711	0.110242	0.376433	no	no
carB	Rv1384	Probable carbamoyl-phosphate synthase large chain CarB (carbamoyl-phosphate synthetase ammonia chain)	+	9843.2	0.0213365	0.0652714	0.326889	0.743752	0.911766	no	no
pyrF	Rv1385	Probable orotidine 5'-phosphate decarboxylase PyrF (OMP decarboxylase) (ompdecase)	+	1195.88	0.253003	0.0967393	2.61531	0.0089146	0.0825042	no	no
mihF	Rv1388	Putative integration host factor MihF	+	12411.3	-0.202134	0.16598	-1.21782	0.223294	0.536221	no	no
gmk	Rv1389	Probable guanylate kinase Gmk	+	10379.2	-0.147904	0.149422	-0.989842	0.322251	0.64502	no	no
rpoZ	Rv1390	Probable DNA-directed RNA polymerase (omega chain) RpoZ (transcriptase omega chain) (RNA polymerase omega subunit)	+	11040.6	-0.217472	0.183368	-1.18599	0.235626	0.552009	no	no
dfp	Rv1391	Probable DNA/pantothenate metabolism flavoprotein homolog Dfp	+	10128.5	-0.0976149	0.0824916	-1.18333	0.236678	0.552272	no	no
metK	Rv1392	Probable S-adenosylmethionine synthetase MetK (mat) (AdoMet synthetase) (methionine adenosyltransferase)	+	9387.51	-0.0672885	0.05964	-1.12825	0.259216	0.578387	no	no
Rv1393c	Rv1393c	Probable monoxygenase	-	2686.47	0.347993	0.10324	3.37071	0.000749752	0.0141977	yes	no
cyp132	Rv1394c	Probable cytochrome P450 132 Cyp132	-	2110.15	0.293138	0.0929821	3.15263	0.00161805	0.0252079	yes	no
Rv1395	Rv1395	Transcriptional regulatory protein	+	571.603	0.211867	0.135428	1.56443	0.117717	0.387791	no	no
vapC10	Rv1397c	Possible toxin VapC10	-	9746.77	0.0349149	0.14316	0.243888	0.807318	0.941535	no	no
vapB10	Rv1398c	Possible antitoxin VapB10	-	9307.88	-0.0199888	0.348264	-0.0573956	0.95423	0.9855	no	no
nlhH	Rv1399c	Probable non lipolytic carboxylesterase NlhH	-	1764.56	-0.0211671	0.09581	-0.220928	0.825148	0.947456	no	no
lipI	Rv1400c	Probable lipase LipH	-	2344.98	-0.0367142	0.0967544	-0.379458	0.704348	0.891332	no	no
Rv1401	Rv1401	Possible membrane protein	+	1117.3	0.00853822	0.0820827	0.10402	0.917154	0.974492	no	no
priA	Rv1402	Putative primosomal protein N' PriA (replication factor Y)	+	1096.07	0.23386	0.14108	1.65764	0.0973901	0.350523	no	no
Rv1403c	Rv1403c	Putative methyltransferase	-	326.525	0.00149106	0.185613	0.00803315	0.993591	0.998734	no	no
Rv1404	Rv1404	Probable transcriptional regulatory protein	+	4895.45	-0.00103364	0.107106	-0.00965066	0.9923	0.998405	no	no
Rv1405c	Rv1405c	Putative methyltransferase	-	247.53	0.153449	0.177675	0.863653	0.387778	0.701607	no	no
fmt	Rv1406	Probable methionyl-tRNA formyltransferase Fmt	+	1237.84	0.0505634	0.0877383	0.576298	0.564414	0.82467	no	no
fmu	Rv1407	Probable Fmu protein (sun protein)	+	1191.73	0.0551928	0.159777	0.345437	0.729766	0.90651	no	no
rpe	Rv1408	Probable ribulose-phosphate 3-epimerase Rpe (PPE) (R5P3E) (pentose-5-phosphate 3-epimerase)	+	5312.4	-0.0925566	0.101997	-0.907444	0.364172	0.682537	no	no
ribG	Rv1409	Probable bifunctional riboflavin biosynthesis protein RibG : diaminohydroxyphosphoribosylaminopyrimidine deaminase (riboflavin-specific deaminase) + 5-amino-6-(5-phosphoribosylamino) uracil reductase (HTP reductase)	+	5835.27	0.0571976	0.0770351	0.742487	0.457792	0.758397	no	no
Rv1410c	Rv1410c	Aminoglycosides/tetracycline-transport integral membrane protein	-	15700.5	-0.0964974	0.0956113	-1.00927	0.312847	0.633348	no	no
lprG	Rv1411c	Conserved lipoprotein LprG	-	11604.8	-0.156624	0.127525	-1.22818	0.219379	0.531598	no	no
ribC	Rv1412	Probable riboflavin synthase alpha chain RibC (RibE)	+	1474.62	0.00543785	0.106415	0.0511005	0.959245	0.986677	no	no
Rv1413	Rv1413	Conserved hypothetical protein	+	890.812	0.0500302	0.136496	0.366531	0.713969	0.896116	no	no
Rv1414	Rv1414	Conserved hypothetical protein	+	197.109	0.306472	0.192862	1.58907	0.112044	0.378782	no	no
ribA2	Rv1415	Probable riboflavin biosynthesis protein RibA2 : GTP cyclohydrolase II + 3,4-dihydroxy-2-butanone 4-phosphate synthase (DHBP synthase)	+	9183.48	-0.00212793	0.104414	-0.0203797	0.98374	0.994378	no	no
ribH	Rv1416	Probable riboflavin synthase beta chain RibH (6,7-dimethyl-8-ribityllumazine synthase) (DMRL synthase) (lumazine synthase)	+	3841.3	0.0196312	0.0809551	0.242495	0.808397	0.941912	no	no
Rv1417	Rv1417	Possible conserved membrane protein	+	1400.36	0.223302	0.102106	2.18695	0.0287462	0.175338	no	no
lprH	Rv1418	Probable lipoprotein LprH	+	2745.38	0.000640203	0.0915907	0.00698983	0.994423	0.998753	no	no
Rv1419	Rv1419	Unknown protein	+	2745.63	-0.135386	0.0711686	-1.90232	0.0571289	0.261131	no	no
uvrC	Rv1420	Probable excinuclease ABC (subunit C - nuclease) UvrC	+	6931.22	-0.0512556	0.0767065	-0.668205	0.504003	0.787491	no	no
Rv1421	Rv1421	Conserved protein	+	3179.82	0.00797748	0.0704975	0.11316	0.909904	0.973488	no	no
Rv1422	Rv1422	Conserved hypothetical protein	+	2932.21	0.103276	0.0836521	1.23459	0.216985	0.531042	no	no
whiA	Rv1423	Probable transcriptional regulatory protein WhiA	+	3789.02	0.0541296	0.0814855	0.664285	0.506508	0.790085	no	no
Rv1424c	Rv1424c	Possible membrane protein	-	1380.26	0.103805	0.0996184	1.04203	0.2974	0.618374	no	no
Rv1425	Rv1425	Possible triacylglycerol synthase (diacylglycerol acyltransferase)	+	5069.47	0.244311	0.0720495	3.39088	0.000696692	0.0133586	yes	no
lipO	Rv1426c	Probable esterase LipO	-	3281.11	-0.0593244	0.07904	-0.750561	0.452917	0.755333	no	no
fadD12	Rv1427c	Possible long-chain-fatty-acid--CoA ligase FadD12 (fatty-acid-CoA synthetase) (fatty-acid-CoA synthase)	-	8753.89	-0.136138	0.0625962	-2.17485	0.029641	0.178754	no	no
Rv1428c	Rv1428c	Conserved hypothetical protein	-	4460.88	-0.169277	0.0709301	-2.38654	0.0170079	0.121072	no	no
Rv1429	Rv1429	Conserved protein	+	1803.58	0.0250602	0.113751	0.220307	0.825632	0.947456	no	no
Rv1431	Rv1431	Conserved membrane protein	+	2783.53	0.0347214	0.101995	0.340422	0.733539	0.907278	no	no
Rv1432	Rv1432	Probable dehydrogenase	+	774.415	0.376215	0.127611	2.94813	0.00319702	0.0413054	yes	no
Rv1433	Rv1433	Possible conserved exported protein	+	2428.81	0.0819753	0.086672	0.945811	0.344245	0.668097	no	no
Rv1434	Rv1434	Hypothetical protein	+	889.453	-0.0712253	0.10825	-0.657973	0.510556	0.791776	no	no
Rv1435c	Rv1435c	Probable conserved proline, glycine, valine-rich secreted protein	-	3709.66	0.0144309	0.0886966	0.162699	0.870755	0.962686	no	no
gap	Rv1436	Probable glyceraldehyde 3-phosphate dehydrogenase Gap (GAPDH)	+	18895.7	-0.219066	0.139539	-1.56993	0.116432	0.386036	no	no
pgk	Rv1437	Probable phosphoglycerate kinase Pgk	+	14095.2	-0.155416	0.102582	-1.51504	0.129763	0.41187	no	no
tpi	Rv1438	Probable triosephosphate isomerase Tpi (TIM)	+	7720.43	-0.121717	0.0963247	-1.26361	0.206369	0.519606	no	no
Rv1439c	Rv1439c	Unknown protein	-	726.692	0.114474	0.103027	1.1111	0.266524	0.586572	no	no
secG	Rv1440	Probable protein-export membrane protein (translocase subunit) SecG	+	3131.98	-0.0270867	0.215462	-0.125715	0.899958	0.972454	no	no
bisC	Rv1442	Probable biotin sulfoxide reductase BisC (BDS reductase) (BSO reductase)	+	5240.82	0.0283563	0.1001	0.28328	0.776962	0.924699	no	no
Rv1443c	Rv1443c	Unknown protein	-	1852.99	-0.255099	0.101691	-2.50856	0.0121225	0.102086	no	no
Rv1444c	Rv1444c	Unknown protein	-	2586.28	0.059389	0.0764415	0.776921	0.437206	0.739037	no	no
devB	Rv1445c	Probable 6-phosphogluconolactonase DevB (6PGL)	-	3429.29	0.132763	0.0660834	2.00902	0.0445354	0.225024	no	no
opcA	Rv1446c	Putative OXPP cycle protein OpcA	-	5893.39	-0.0638425	0.0651913	-0.979311	0.327426	0.650503	no	no
zwf2	Rv1447c	Probable glucose-6-phosphate 1-dehydrogenase Zwf2 (G6PD)	-	15128.9	-0.088126	0.101809	-0.865599	0.38671	0.701216	no	no
tal	Rv1448c	Probable transaldolase Tal	-	11141.9	-0.0638218	0.100817	-0.633049	0.526702	0.799302	no	no
tkt	Rv1449c	Transketolase Tkt (TK)	-	19092.9	-0.0939081	0.106441	-0.882259	0.377637	0.69423	no	no
ctaB	Rv1451	Probable cytochrome C oxidase assembly factor CtaB	+	4925.82	-0.193156	0.0791009	-2.44189	0.0146106	0.11277	no	no
Rv1453	Rv1453	Possible transcriptional activator protein	+	1431.69	0.105912	0.0894666	1.18382	0.236485	0.552272	no	no
qor	Rv1454c	Probable quinone reductase Qor (NADPH:quinone reductase) (zeta-crystallin homolog protein)	-	2640.88	0.0839822	0.0831603	1.00988	0.312552	0.633348	no	no
Rv1455	Rv1455	Conserved protein	+	649.559	0.0399998	0.131426	0.304351	0.76086	0.918585	no	no
Rv1456c	Rv1456c	Probable unidentified antibiotic-transport integral membrane ABC transporter	-	622.505	-0.18398	0.144042	-1.27727	0.201507	0.511536	no	no
Rv1457c	Rv1457c	Probable unidentified antibiotic-transport integral membrane ABC transporter	-	2079.69	-0.207646	0.0958437	-2.1665	0.0302727	0.17998	no	no
Rv1458c	Rv1458c	Probable unidentified antibiotic-transport ATP-binding protein ABC transporter	-	3998.26	-0.0922639	0.0738685	-1.24903	0.211655	0.525619	no	no
Rv1459c	Rv1459c	Possible conserved integral membrane protein	-	4243.75	-0.0402059	0.0668561	-0.601379	0.547587	0.814561	no	no
Rv1460	Rv1460	Probable transcriptional regulatory protein	+	2267.98	-0.189882	0.0825238	-2.30094	0.0213951	0.142089	no	no
Rv1461	Rv1461	Conserved protein	+	29762.5	-0.147646	0.09965	-1.48164	0.138436	0.42507	no	no
Rv1462	Rv1462	Conserved hypothetical protein	+	6491.66	-0.0887849	0.0612139	-1.4504	0.146946	0.436056	no	no
Rv1463	Rv1463	Probable conserved ATP-binding protein ABC transporter	+	5565.9	-0.180298	0.0940703	-1.91663	0.0552846	0.256463	no	no
csd	Rv1464	Probable cysteine desulfurase Csd	+	6290.59	-0.0767299	0.0695722	-1.10288	0.270078	0.589161	no	no
Rv1465	Rv1465	Possible nitrogen fixation related protein	+	2966.99	-0.0704386	0.0781306	-0.901549	0.367296	0.683925	no	no
Rv1466	Rv1466	Conserved protein	+	3755.66	-0.232713	0.098416	-2.36458	0.0180504	0.1259	no	no
fadE15	Rv1467c	Probable acyl-CoA dehydrogenase FadE15	-	6837	-0.248444	0.0690566	-3.59769	0.00032106	0.00779509	yes	no
ctpD	Rv1469	Probable cation transporter P-type ATPase D CtpD	+	4455.16	0.184331	0.094927	1.94182	0.052159	0.24994	no	no
trxA	Rv1470	Probable thioredoxin TrxA	+	1994.26	0.0783605	0.0923372	0.848635	0.396084	0.706215	no	no
trxB1	Rv1471	Probable thioredoxin TrxB1	+	2362.95	-0.301329	0.071973	-4.1867	2.83e-05	0.00109102	yes	no
echA12	Rv1472	Possible enoyl-CoA hydratase EchA12 (enoyl hydrase) (unsaturated acyl-CoA hydratase) (crotonase)	+	6651.91	-0.224918	0.100664	-2.23436	0.0254596	0.160959	no	no
Rv1473	Rv1473	Probable macrolide-transport ATP-binding protein ABC transporter	+	5529.96	-0.162685	0.0625329	-2.6016	0.00927903	0.0842095	no	no
Rv1473A	Rv1473A	Possible transcriptional regulatory protein	+	363.971	-0.160189	0.155866	-1.02774	0.304074	0.62429	no	no
Rv1474c	Rv1474c	Probable transcriptional regulatory protein	-	2301.72	-0.147324	0.0715533	-2.05894	0.0395	0.210987	no	no
acn	Rv1475c	Probable iron-regulated aconitate hydratase Acn (citrate hydro-lyase) (aconitase)	-	24865	-0.148143	0.0835593	-1.7729	0.0762446	0.304571	no	no
Rv1476	Rv1476	Possible membrane protein	+	5147.06	-0.114131	0.119492	-0.955137	0.339509	0.663624	no	no
ripA	Rv1477	Peptidoglycan hydrolase	+	18357.7	-0.0580529	0.119545	-0.485614	0.627241	0.851272	no	no
Rv1478	Rv1478	Possible invasion protein	+	5952.75	-0.0139405	0.104282	-0.133681	0.893655	0.971135	no	no
moxR1	Rv1479	Probable transcriptional regulatory protein MoxR1	+	16528.1	-0.080977	0.120244	-0.67344	0.500668	0.784472	no	no
Rv1480	Rv1480	Conserved protein	+	5375.32	-0.0721172	0.0753289	-0.957365	0.338383	0.662728	no	no
Rv1481	Rv1481	Probable membrane protein	+	6118.88	-0.0650469	0.0797302	-0.815837	0.414593	0.721678	no	no
Rv1482c	Rv1482c	Conserved hypothetical protein	-	116.257	0.0795557	0.242029	0.328704	0.74238	0.910981	no	no
fabG1	Rv1483	3-oxoacyl-[acyl-carrier protein] reductase FabG1 (3-ketoacyl-acyl carrier protein reductase) (mycolic acid biosynthesis a protein)	+	10966.4	-0.303873	0.151929	-2.0001	0.0454899	0.228136	no	no
inhA	Rv1484	NADH-dependent enoyl-[acyl-carrier-protein] reductase InhA (NADH-dependent enoyl-ACP reductase)	+	8057.22	-0.225797	0.0722369	-3.12578	0.00177332	0.0267941	yes	no
hemZ	Rv1485	Ferrochelatase HemZ (protoheme ferro-lyase) (heme synthetase)	+	2922.04	-0.242564	0.0977952	-2.48032	0.0131263	0.107141	no	no
Rv1486c	Rv1486c	Conserved hypothetical protein	-	3905.69	-0.0729422	0.0706733	-1.0321	0.302023	0.622871	no	no
Rv1487	Rv1487	Conserved membrane protein	+	2030.7	0.105375	0.107299	0.982067	0.326067	0.648836	no	no
Rv1488	Rv1488	Possible exported conserved protein	+	7352.86	0.053263	0.07025	0.758192	0.448336	0.751717	no	no
Rv1489	Rv1489	Conserved protein	+	2185.46	-0.00502587	0.0908739	-0.055306	0.955895	0.9865	no	no
Rv1489A	Rv1489A	Conserved protein	+	930.589	0.141293	0.0909593	1.55337	0.120335	0.393449	no	no
Rv1490	Rv1490	Probable membrane protein	+	1414.44	0.133568	0.125502	1.06426	0.287209	0.606024	no	no
Rv1491c	Rv1491c	Conserved membrane protein	-	3224.15	0.0706225	0.131276	0.537968	0.590599	0.837594	no	no
mutA	Rv1492	Probable methylmalonyl-CoA mutase small subunit MutA (MCM)	+	2620.59	-0.0126585	0.0982312	-0.128864	0.897465	0.972335	no	no
mutB	Rv1493	Probable methylmalonyl-CoA mutase large subunit MutB (MCM)	+	5733.16	-0.0386475	0.0880523	-0.438915	0.660723	0.870042	no	no
mazE4	Rv1494	Possible antitoxin MazE4	+	2179.26	-0.210558	0.0850102	-2.47686	0.0132544	0.107141	no	no
mazF4	Rv1495	Possible toxin MazF4	+	2026.3	-0.21583	0.0936962	-2.30351	0.0212504	0.141631	no	no
Rv1496	Rv1496	Possible transport system kinase	+	3206.46	0.0624779	0.078272	0.798215	0.424746	0.729166	no	no
lipL	Rv1497	Probable esterase LipL	+	10791.1	0.00420923	0.0847169	0.0496858	0.960373	0.986804	no	no
Rv1498c	Rv1498c	Probable methyltransferase	-	5961.56	-0.173581	0.108336	-1.60225	0.109099	0.373898	no	no
Rv1498A	Rv1498A	Conserved protein	-	1930.55	-0.0873983	0.122877	-0.711268	0.476918	0.771891	no	no
Rv1499	Rv1499	Hypothetical protein	+	268.03	0.242369	0.149324	1.62311	0.104566	0.366422	no	no
Rv1500	Rv1500	Probable glycosyltransferase	+	6406.36	0.182903	0.109558	1.66946	0.0950259	0.345624	no	no
Rv1501	Rv1501	Conserved hypothetical protein	+	5248.3	0.00205441	0.142001	0.0144676	0.988457	0.996721	no	no
Rv1502	Rv1502	Hypothetical protein	+	5595.85	0.192641	0.113449	1.69804	0.0894995	0.333638	no	no
Rv1503c	Rv1503c	Conserved hypothetical protein	-	686.909	0.057766	0.150944	0.382699	0.701943	0.890589	no	no
Rv1504c	Rv1504c	Conserved hypothetical protein	-	849.017	0.0489263	0.11873	0.412081	0.68028	0.880077	no	no
Rv1505c	Rv1505c	Conserved hypothetical protein	-	2216.31	0.0761763	0.123721	0.615708	0.538087	0.806053	no	no
Rv1506c	Rv1506c	Hypothetical protein	-	2012.63	0.0130102	0.109659	0.118642	0.905559	0.972495	no	no
Rv1507c	Rv1507c	Conserved protein	-	6793.2	0.0640166	0.114982	0.556754	0.577696	0.830625	no	no
Rv1507A	Rv1507A	Hypothetical protein	+	107.529	-0.158083	0.270031	-0.585425	0.558262	0.822285	no	no
Rv1508c	Rv1508c	Probable membrane protein	-	12148.9	-0.112891	0.128673	-0.877353	0.380295	0.697021	no	no
Rv1508A	Rv1508A	Conserved hypothetical protein	+	998.523	0.0567383	0.123116	0.460851	0.644905	0.861292	no	no
Rv1509	Rv1509	Hypothetical protein	+	2059.73	0.103296	0.104397	0.989451	0.322443	0.645058	no	no
Rv1510	Rv1510	Conserved probable membrane protein	+	1372.48	0.206861	0.113987	1.81478	0.069558	0.290589	no	no
gmdA	Rv1511	GDP-D-mannose dehydratase GmdA (GDP-mannose 4,6 dehydratase) (GMD)	+	6967.26	-0.0907128	0.079006	-1.14818	0.250896	0.570967	no	no
epiA	Rv1512	Probable nucleotide-sugar epimerase EpiA	+	4878.91	-0.0677887	0.0610652	-1.1101	0.266954	0.586572	no	no
Rv1513	Rv1513	Conserved protein	+	4544.52	-0.0120311	0.0831848	-0.144631	0.885002	0.967795	no	no
Rv1514c	Rv1514c	Conserved hypothetical protein	-	2055.44	0.0428747	0.0917745	0.467174	0.640375	0.859727	no	no
Rv1515c	Rv1515c	Conserved hypothetical protein	-	5839.39	-0.237315	0.0762365	-3.11288	0.00185274	0.0277096	yes	no
Rv1516c	Rv1516c	Probable sugar transferase	-	3643.43	-0.252483	0.073761	-3.42298	0.000619376	0.0125063	yes	no
Rv1517	Rv1517	Conserved hypothetical transmembrane protein	+	504.208	0.269875	0.151925	1.77636	0.0756728	0.303584	no	no
Rv1518	Rv1518	Conserved hypothetical protein	+	428.533	-0.163245	0.159208	-1.02535	0.305196	0.624355	no	no
Rv1519	Rv1519	Conserved hypothetical protein	+	211.91	0.562648	0.242122	2.32382	0.0201353	0.136141	no	no
Rv1520	Rv1520	Probable sugar transferase	+	2541.59	-0.0476931	0.0799817	-0.5963	0.550975	0.817301	no	no
fadD25	Rv1521	Probable fatty-acid-AMP ligase FadD25 (fatty-acid-AMP synthetase) (fatty-acid-AMP synthase)	+	17001.3	0.0128871	0.0898208	0.143476	0.885914	0.967795	no	no
Rv1523	Rv1523	Probable methyltransferase	+	2334.45	0.00209258	0.0970943	0.021552	0.982805	0.993702	no	no
Rv1524	Rv1524	Probable glycosyltransferase	+	2270.42	0.0523898	0.101983	0.513712	0.607453	0.844909	no	no
wbbL2	Rv1525	Possible rhamnosyl transferase WbbL2	+	2370.72	0.0233189	0.0790529	0.294979	0.76801	0.919203	no	no
Rv1526c	Rv1526c	Probable glycosyltransferase	-	2365.72	0.121758	0.085399	1.42575	0.15394	0.445531	no	no
pks5	Rv1527c	Probable polyketide synthase Pks5	-	12721.2	0.136498	0.0785511	1.7377	0.0822642	0.317693	no	no
papA4	Rv1528c	Probable conserved polyketide synthase associated protein PapA4	-	210.152	-0.280531	0.25603	-1.0957	0.273212	0.593228	no	no
fadD24	Rv1529	Probable fatty-acid-AMP ligase FadD24 (fatty-acid-AMP synthetase) (fatty-acid-AMP synthase)	+	3699.84	0.0135838	0.0786565	0.172697	0.86289	0.96065	no	no
Rv1531	Rv1531	Conserved protein	+	2020.45	0.00472431	0.0983268	0.048047	0.961679	0.987309	no	no
Rv1532c	Rv1532c	Conserved hypothetical protein	-	471.538	-0.00286907	0.127923	-0.0224281	0.982106	0.993517	no	no
Rv1533	Rv1533	Conserved protein	+	2890.82	0.0479095	0.0892971	0.536518	0.591601	0.837594	no	no
Rv1534	Rv1534	Probable transcriptional regulator	+	2013.41	0.150046	0.0905651	1.65678	0.0975647	0.350764	no	no
Rv1535	Rv1535	Unknown protein	+	2426.73	-0.404473	0.0963229	-4.19914	2.68e-05	0.00104355	yes	no
ileS	Rv1536	Isoleucyl-tRNA synthetase IleS	+	11251.3	-0.110474	0.0726203	-1.52125	0.128197	0.410383	no	no
dinX	Rv1537	Probable DNA polymerase IV DinX (pol IV 1) (DNA nucleotidyltransferase (DNA-directed))	+	685.964	0.0932858	0.159733	0.584013	0.559212	0.822285	no	no
ansA	Rv1538c	Probable L-aparaginase AnsA	-	2087.27	0.229453	0.0770861	2.97658	0.00291483	0.0386473	yes	no
lspA	Rv1539	Probable lipoprotein signal peptidase LspA	+	2919.82	-0.000647286	0.0691388	-0.00936213	0.99253	0.998405	no	no
Rv1540	Rv1540	Conserved hypothetical protein member of yabO/yceC/yfiI family	+	4407.45	-0.0428398	0.0730618	-0.58635	0.55764	0.822167	no	no
lprI	Rv1541c	Possible lipoprotein LprI	-	1401.38	0.139062	0.110005	1.26414	0.20618	0.519479	no	no
glbN	Rv1542c	Hemoglobin GlbN	-	171.248	-0.0182687	0.20312	-0.0899402	0.928335	0.97696	no	no
Rv1543	Rv1543	Possible fatty acyl-CoA reductase	+	12729.7	-0.255887	0.134161	-1.90732	0.0564796	0.259113	no	no
Rv1544	Rv1544	Possible ketoacyl reductase	+	5468.58	-0.198412	0.106183	-1.86858	0.0616813	0.273133	no	no
Rv1545	Rv1545	Hypothetical protein	+	1325.5	-0.215946	0.0829683	-2.60275	0.00924781	0.0842095	no	no
Rv1546	Rv1546	Conserved protein	+	3190.2	-0.0421421	0.0905159	-0.465577	0.641519	0.859727	no	no
dnaE1	Rv1547	Probable DNA polymerase III (alpha chain) DnaE1 (DNA nucleotidyltransferase)	+	30222.4	-0.0168457	0.0855395	-0.196935	0.843878	0.953759	no	no
fadD11.1	Rv1549	Possible fatty-acid-CoA ligase FadD11.1 (fatty-acid-CoA synthetase) (fatty-acid-CoA synthase)	+	1795.22	0.161622	0.091123	1.77367	0.0761184	0.304392	no	no
fadD11	Rv1550	Probable fatty-acid-CoA ligase FadD11 (fatty-acid-CoA synthetase) (fatty-acid-CoA synthase)	+	3028.4	0.292335	0.0763253	3.83012	0.000128082	0.003628	yes	no
plsB1	Rv1551	Possible acyltransferase PlsB1	+	1101.41	0.303058	0.147367	2.05649	0.0397354	0.211639	no	no
frdA	Rv1552	Probable fumarate reductase [flavoprotein subunit] FrdA (fumarate dehydrogenase) (fumaric hydrogenase)	+	1079.21	0.635064	0.127246	4.99083	6.01e-07	3.84e-05	yes	no
frdB	Rv1553	Probable fumarate reductase [iron-sulfur subunit] FrdB (fumarate dehydrogenase) (fumaric hydrogenase)	+	307.898	0.395099	0.163071	2.42287	0.0153984	0.114864	no	no
frdC	Rv1554	Probable fumarate reductase [membrane anchor subunit] FrdC (fumarate dehydrogenase) (fumaric hydrogenase)	+	86.3852	0.67239	0.256735	2.619	0.00881868	0.0825042	no	no
frdD	Rv1555	Probable fumarate reductase [membrane anchor subunit] FrdD (fumarate dehydrogenase) (fumaric hydrogenase)	+	191.245	0.460781	0.187105	2.46268	0.0137903	0.109386	no	no
Rv1556	Rv1556	Possible regulatory protein	+	1179.51	-0.0232091	0.114506	-0.202689	0.839378	0.952173	no	no
mmpL6	Rv1557	Probable conserved transmembrane transport protein MmpL6	+	1282.06	0.110026	0.0990847	1.11043	0.266815	0.586572	no	no
Rv1558	Rv1558	Conserved protein	+	2809.58	-0.13465	0.0717131	-1.87762	0.060433	0.270224	no	no
ilvA	Rv1559	Probable threonine dehydratase IlvA	+	6762.27	-0.130471	0.0664639	-1.96304	0.0496418	0.240428	no	no
vapB11	Rv1560	Possible antitoxin VapB11	+	1055.8	-0.160235	0.119024	-1.34625	0.178223	0.479062	no	no
vapC11	Rv1561	Possible toxin VapC11	+	1212.09	-0.115998	0.0982174	-1.18103	0.23759	0.5528	no	no
treZ	Rv1562c	Maltooligosyltrehalose trehalohydrolase TreZ	-	1920.85	0.0891452	0.109315	0.815487	0.414794	0.721691	no	no
treY	Rv1563c	Maltooligosyltrehalose synthase TreY	-	2451.11	0.0280147	0.130271	0.21505	0.829729	0.949118	no	no
treX	Rv1564c	Probable maltooligosyltrehalose synthase TreX	-	6905.87	0.00927185	0.0813887	0.113921	0.909301	0.973488	no	no
Rv1565c	Rv1565c	Conserved hypothetical membrane protein	-	11542.9	-0.0542624	0.0990148	-0.548023	0.583676	0.834876	no	no
Rv1566c	Rv1566c	Possible Inv protein	-	8880.53	-0.0897292	0.126235	-0.710813	0.4772	0.771891	no	no
Rv1567c	Rv1567c	Probable hypothetical membrane protein	-	1208.63	-0.0123735	0.113437	-0.109078	0.91314	0.973607	no	no
bioA	Rv1568	Adenosylmethionine-8-amino-7-oxononanoate aminotransferase BioA	+	2097.74	-0.115636	0.107494	-1.07574	0.282044	0.601438	no	no
bioF1	Rv1569	Probable 8-amino-7-oxononanoate synthase BioF1 (AONS) (8-amino-7-ketopelargonate synthase) (7-keto-8-amino-pelargonic acid synthetase) (7-KAP synthetase) (L-alanine--pimelyl CoA ligase)	+	2662.76	-0.00695041	0.0831942	-0.0835444	0.933419	0.979011	no	no
bioD	Rv1570	Dethiobiotin synthetase BioD	+	1286.97	-0.0193668	0.0931971	-0.207805	0.835381	0.951124	no	no
Rv1571	Rv1571	Conserved protein	+	594.934	0.121434	0.178805	0.679146	0.497046	0.782754	no	no
bioB	Rv1589	Probable biotin synthetase BioB	+	8659.82	-0.214929	0.0765382	-2.80813	0.00498305	0.057328	no	no
Rv1590	Rv1590	Conserved hypothetical protein	+	2217.09	-0.151398	0.0910552	-1.66271	0.0963708	0.349157	no	no
Rv1591	Rv1591	Probable transmembrane protein	+	2451.84	-0.0236378	0.0676216	-0.34956	0.726669	0.905068	no	no
Rv1592c	Rv1592c	Conserved hypothetical protein	-	11440.4	-0.689004	0.0566628	-12.1597	5.09e-34	2.72e-31	yes	no
Rv1593c	Rv1593c	Conserved protein	-	3425.86	-0.0213716	0.104709	-0.204105	0.838272	0.952012	no	no
nadA	Rv1594	Probable quinolinate synthetase NadA	+	18747.5	-0.137704	0.130519	-1.05504	0.291405	0.611428	no	no
nadB	Rv1595	Probable L-aspartate oxidase NadB	+	20743	-0.0375999	0.091753	-0.409795	0.681956	0.880164	no	no
nadC	Rv1596	Probable nicotinate-nucleotide pyrophosphatase NadC	+	11976.3	-0.0159623	0.102883	-0.15515	0.876703	0.966002	no	no
Rv1597	Rv1597	Hypothetical protein	+	3562.66	-0.128178	0.0691129	-1.85462	0.0636512	0.278353	no	no
Rv1598c	Rv1598c	Conserved protein	-	1779.3	0.103642	0.112111	0.92446	0.355247	0.675752	no	no
hisD	Rv1599	Probable histidinol dehydrogenase HisD (HDH)	+	3939.99	0.0335916	0.079285	0.423682	0.671798	0.87582	no	no
hisC1	Rv1600	Probable histidinol-phosphate aminotransferase HisC1	+	5540.08	-0.126765	0.0864489	-1.46636	0.142551	0.431579	no	no
hisB	Rv1601	Probable imidazole glycerol-phosphate dehydratase HisB	+	3973.03	-0.259911	0.0793046	-3.27737	0.00104779	0.0186556	yes	no
hisH	Rv1602	Probable amidotransferase HisH	+	2613.09	-0.0784064	0.0791425	-0.990699	0.321832	0.644527	no	no
hisA	Rv1603	Probable phosphoribosylformimino-5-aminoimidazole carboxamide ribotide isomerase HisA	+	2368.93	-0.0660978	0.0982776	-0.672562	0.501226	0.784792	no	no
impA	Rv1604	Probable inositol-monophosphatase ImpA (imp)	+	3123.63	-0.0755708	0.0828418	-0.91223	0.361648	0.680524	no	no
hisF	Rv1605	Probable cyclase HisF	+	2307.47	-0.0978542	0.0935781	-1.0457	0.295701	0.616636	no	no
hisI	Rv1606	Probable phosphoribosyl-AMP 1,6 cyclohydrolase HisI	+	1561.48	-0.152145	0.0789358	-1.92745	0.0539234	0.25361	no	no
chaA	Rv1607	Probable ionic transporter integral membrane protein ChaA	+	1872.71	-0.364221	0.0914383	-3.98325	6.8e-05	0.00221024	yes	no
bcpB	Rv1608c	Probable peroxidoxin BcpB	-	4366.98	-0.0892908	0.0957462	-0.932578	0.351038	0.671793	no	no
trpE	Rv1609	Anthranilate synthase component I TrpE (glutamine amidotransferase)	+	6040.03	-0.099506	0.0589543	-1.68785	0.0914402	0.337841	no	no
Rv1610	Rv1610	Possible conserved membrane protein	+	2813.21	-0.054641	0.105027	-0.520256	0.602885	0.842541	no	no
trpC	Rv1611	Probable indole-3-glycerol phosphate synthase TrpC	+	14541.2	-0.219715	0.12454	-1.76421	0.0776962	0.308501	no	no
trpB	Rv1612	Tryptophan synthase, beta subunit TrpB	+	17517.9	-0.267222	0.112007	-2.38576	0.0170439	0.121072	no	no
trpA	Rv1613	Probable tryptophan synthase, alpha subunit TrpA	+	7531.73	-0.10239	0.0719606	-1.42286	0.154776	0.445847	no	no
lgt	Rv1614	Possible prolipoprotein diacylglyceryl transferases Lgt	+	16670	-0.210366	0.110221	-1.90858	0.056316	0.25868	no	no
Rv1615	Rv1615	Probable membrane protein	+	3469.56	-0.0772483	0.141259	-0.546854	0.584479	0.835385	no	no
Rv1616	Rv1616	Conserved membrane protein	+	1557.9	0.0450332	0.0856373	0.52586	0.598985	0.841009	no	no
pykA	Rv1617	Probable pyruvate kinase PykA	+	11719.4	-0.157378	0.0863913	-1.82169	0.0685026	0.288436	no	no
tesB1	Rv1618	Probable acyl-CoA thioesterase II TesB1	+	9238.66	-0.134035	0.113385	-1.18212	0.23716	0.5528	no	no
Rv1619	Rv1619	Conserved membrane protein	+	1514.81	0.249829	0.104056	2.40092	0.016354	0.119102	no	no
cydC	Rv1620c	Probable 'component linked with the assembly of cytochrome' transport transmembrane ATP-binding protein ABC transporter CydC	-	1155.61	0.357506	0.127487	2.80425	0.00504335	0.0576669	no	no
cydD	Rv1621c	Probable 'component linked with the assembly of cytochrome' transport transmembrane ATP-binding protein ABC transporter CydD	-	1244.78	0.163267	0.12663	1.28932	0.197286	0.5061	no	no
cydB	Rv1622c	Probable integral membrane cytochrome D ubiquinol oxidase (subunit II) CydB (cytochrome BD-I oxidase subunit II)	-	1614.2	0.233464	0.111035	2.10262	0.0354992	0.197517	no	no
cydA	Rv1623c	Probable integral membrane cytochrome D ubiquinol oxidase (subunit I) CydA (cytochrome BD-I oxidase subunit I)	-	4062.45	-0.00373246	0.0782567	-0.0476952	0.961959	0.987309	no	no
Rv1624c	Rv1624c	Probable conserved membrane protein	-	1546.28	0.259082	0.134142	1.9314	0.0534335	0.252257	no	no
cya	Rv1625c	Membrane-anchored adenylyl cyclase Cya (ATP pyrophosphate-lyase) (adenylate cyclase)	-	5688.1	0.104333	0.0635701	1.64123	0.10075	0.358425	no	no
Rv1626	Rv1626	Probable two-component system transcriptional regulator	+	13944.8	-0.1424	0.149675	-0.951394	0.341404	0.664951	no	no
Rv1627c	Rv1627c	Probable nonspecific lipid-transfer protein	-	5876.22	-0.161158	0.0772904	-2.0851	0.0370605	0.203617	no	no
Rv1628c	Rv1628c	Conserved protein	-	1682.45	-0.115932	0.0773888	-1.49805	0.13412	0.41868	no	no
polA	Rv1629	Probable DNA polymerase I PolA	+	8231.29	-0.209186	0.0660776	-3.16576	0.00154678	0.0244676	yes	no
rpsA	Rv1630	30S ribosomal protein S1 RpsA	+	43123.8	-0.171884	0.167749	-1.02465	0.305527	0.624355	no	no
coaE	Rv1631	Probable dephospho-CoA kinase CoaE (dephosphocoenzyme a kinase)	+	7448.22	-0.170258	0.0801593	-2.124	0.0336702	0.192497	no	no
Rv1632c	Rv1632c	Hypothetical protein	-	3851	0.134442	0.10945	1.22834	0.219321	0.531598	no	no
uvrB	Rv1633	Probable excinuclease ABC (subunit B - helicase) UvrB	+	10468.4	-0.0360058	0.0621392	-0.579438	0.562294	0.823831	no	no
Rv1634	Rv1634	Possible drug efflux membrane protein	+	2744.43	0.105961	0.0782917	1.35342	0.175923	0.474585	no	no
Rv1635c	Rv1635c	Probable mannosyltransferase. Probable conserved transmembrane protein.	-	3175.98	0.0360564	0.0740766	0.486745	0.626439	0.850802	no	no
TB15.3	Rv1636	Iron-regulated universal stress protein family protein TB15.3	+	7120.19	0.084172	0.135771	0.619956	0.535287	0.804675	no	no
Rv1637c	Rv1637c	Conserved protein	-	4335.46	-0.0853902	0.0596476	-1.43158	0.152265	0.444433	no	no
uvrA	Rv1638	Probable excinuclease ABC (subunit A - DNA-binding ATPase) UvrA	+	11927.6	-0.0886611	0.0613621	-1.44489	0.14849	0.438717	no	no
Rv1638A	Rv1638A	Conserved hypothetical protein	-	2508.24	0.0241132	0.0744683	0.323805	0.746085	0.913429	no	no
Rv1639c	Rv1639c	Conserved hypothetical membrane protein	-	7847.39	0.0332206	0.0961105	0.34565	0.729606	0.90651	no	no
lysX	Rv1640c	Lysyl-tRNA synthetase 2 LysX	-	5028.19	0.0645561	0.0992156	0.650665	0.515263	0.795022	no	no
infC	Rv1641	Probable initiation factor if-3 InfC	+	20943.5	-0.121678	0.164617	-0.739155	0.459813	0.760389	no	no
rpmI	Rv1642	50S ribosomal protein L35 RpmI	+	6406.9	-0.216809	0.125825	-1.7231	0.0848711	0.32315	no	no
rplT	Rv1643	50S ribosomal protein L20 RplT	+	6854.92	-0.187275	0.131721	-1.42176	0.155096	0.44608	no	no
tsnR	Rv1644	Possible 23S rRNA methyltransferase TsnR	+	3652.27	-0.239528	0.0806514	-2.96991	0.00297883	0.0393564	yes	no
Rv1645c	Rv1645c	Conserved hypothetical protein	-	7035.42	0.333813	0.0958159	3.48389	0.000494175	0.0107426	yes	no
Rv1647	Rv1647	Adenylate cyclase (ATP pyrophosphate-lyase) (adenylyl cyclase)	+	1862.94	0.0656809	0.0845785	0.776568	0.437414	0.739037	no	no
Rv1648	Rv1648	Probable transmembrane protein	+	2734.47	0.159166	0.0822356	1.93548	0.0529309	0.250822	no	no
pheS	Rv1649	Probable phenylalanyl-tRNA synthetase, alpha chain PheS	+	3947.18	-0.229436	0.0847872	-2.70602	0.00680956	0.0707248	no	no
pheT	Rv1650	Probable phenylalanyl-tRNA synthetase, beta chain PheT	+	6138.31	-0.144806	0.0991665	-1.46023	0.144227	0.433363	no	no
argC	Rv1652	Probable N-acetyl-gamma-glutamyl-phoshate reductase ArgC	+	4911.72	-0.537002	0.0880661	-6.09772	1.08e-09	1.15e-07	yes	no
argJ	Rv1653	Probable glutamate N-acetyltransferase ArgJ	+	11076.6	-0.404659	0.0925667	-4.37154	1.23e-05	0.000555775	yes	no
argB	Rv1654	Probable acetylglutamate kinase ArgB	+	8199.49	-0.327233	0.082753	-3.95434	7.67e-05	0.00245265	yes	no
argD	Rv1655	Probable acetylornithine aminotransferase ArgD	+	7937.64	-0.373704	0.0665697	-5.61373	1.98e-08	1.9e-06	yes	no
argF	Rv1656	Probable ornithine carbamoyltransferase, anabolic ArgF	+	5539.72	-0.315363	0.0881491	-3.57761	0.000346748	0.00820564	yes	no
argR	Rv1657	Probable arginine repressor ArgR (AHRC)	+	2472.48	-0.197009	0.0833648	-2.36321	0.0181173	0.125912	no	no
argG	Rv1658	Probable argininosuccinate synthase ArgG	+	14172.5	-0.388083	0.102303	-3.79345	0.000148571	0.00405481	yes	no
argH	Rv1659	Probable argininosuccinate lyase ArgH	+	5656.34	-0.29841	0.0601853	-4.95818	7.12e-07	4.36e-05	yes	no
pks10	Rv1660	Chalcone synthase Pks10	+	3653.44	0.0543717	0.0718864	0.756356	0.449436	0.752721	no	no
pks7	Rv1661	Probable polyketide synthase Pks7	+	6687.19	0.505342	0.147018	3.43727	0.000587607	0.0120058	yes	no
pks8	Rv1662	Probable polyketide synthase Pks8	+	4321.99	0.657972	0.130137	5.05602	4.28e-07	3.02e-05	yes	no
pks17	Rv1663	Probable polyketide synthase Pks17	+	1527.04	0.239411	0.161464	1.48275	0.138141	0.42507	no	no
pks9	Rv1664	Probable polyketide synthase Pks9	+	2791.12	0.207682	0.130776	1.58807	0.112271	0.378828	no	no
pks11	Rv1665	Chalcone synthase Pks11	+	3205.11	0.138437	0.08113	1.70636	0.0879413	0.330797	no	no
cyp139	Rv1666c	Probable cytochrome P450 139 Cyp139	-	3911.65	0.050584	0.0611927	0.826634	0.408445	0.716311	no	no
Rv1667c	Rv1667c	Probable second part of macrolide-transport ATP-binding protein ABC transporter	-	1375.01	0.0506755	0.145852	0.347445	0.728257	0.905275	no	no
Rv1668c	Rv1668c	Probable first part of macrolide-transport ATP-binding protein ABC transporter	-	2256.93	-0.113706	0.10742	-1.05852	0.289819	0.609811	no	no
Rv1669	Rv1669	Hypothetical protein	+	89.3161	0.301508	0.263141	1.14581	0.251875	0.571111	no	no
Rv1670	Rv1670	Conserved hypothetical protein	+	356.573	0.261779	0.142295	1.83969	0.0658141	0.281877	no	no
Rv1671	Rv1671	Probable membrane protein	+	266.914	0.169234	0.257344	0.657619	0.510783	0.791776	no	no
Rv1672c	Rv1672c	Probable conserved integral membrane transport protein	-	1764.97	0.170415	0.0931093	1.83027	0.0672094	0.28465	no	no
Rv1673c	Rv1673c	Conserved hypothetical protein	-	543.48	0.145877	0.171783	0.84919	0.395775	0.706098	no	no
Rv1674c	Rv1674c	Probable transcriptional regulatory protein	-	246.549	0.0771636	0.180153	0.428323	0.668416	0.874287	no	no
cmr	Rv1675c	Probable transcriptional regulatory protein Cmr	-	318.183	0.283036	0.189915	1.49033	0.136138	0.422422	no	no
Rv1676	Rv1676	Unknown protein	+	6047.26	-0.214189	0.0835285	-2.56426	0.0103395	0.0905371	no	no
dsbF	Rv1677	Probable conserved lipoprotein DsbF	+	5368.58	-0.179343	0.0926346	-1.93603	0.0528646	0.250822	no	no
Rv1678	Rv1678	Probable integral membrane protein	+	3364.24	0.119328	0.112697	1.05884	0.289675	0.609811	no	no
fadE16	Rv1679	Possible acyl-CoA dehydrogenase FadE16	+	3300.77	0.223	0.0939238	2.37426	0.017584	0.123583	no	no
Rv1680	Rv1680	Hypothetical protein	+	2226.64	0.187498	0.0827753	2.26514	0.0235039	0.152043	no	no
moeX	Rv1681	Possible molybdopterin biosynthesis protein MoeX	+	2216.54	0.36789	0.101564	3.62227	0.000292033	0.00727941	yes	no
Rv1682	Rv1682	Probable coiled-coil structural protein	+	1214.82	0.208904	0.164795	1.26766	0.20492	0.517699	no	no
Rv1683	Rv1683	Possible bifunctional enzyme; long-chain acyl-CoA synthase and lipase.	+	17490.6	-0.211966	0.0655357	-3.23436	0.00121915	0.02072	yes	no
Rv1684	Rv1684	Conserved hypothetical protein	+	1251.21	-0.242036	0.10004	-2.41938	0.015547	0.115272	no	no
Rv1685c	Rv1685c	Conserved hypothetical protein	-	733.778	0.0991443	0.123865	0.800423	0.423466	0.728491	no	no
Rv1686c	Rv1686c	Probable conserved integral membrane protein ABC transporter	-	1183.81	0.0117111	0.113202	0.103453	0.917604	0.974686	no	no
Rv1687c	Rv1687c	Probable conserved ATP-binding protein ABC transporter	-	987.309	0.08259	0.122555	0.673901	0.500374	0.784444	no	no
mpg	Rv1688	Possible 3-methyladenine DNA glycosylase Mpg	+	438.393	0.195878	0.163153	1.20058	0.229915	0.544083	no	no
tyrS	Rv1689	Probable tyrosyl-tRNA synthase TyrS (TYRRS)	+	5677.44	9.14e-05	0.111786	0.000817416	0.999348	0.999391	no	no
lprJ	Rv1690	Probable lipoprotein LprJ	+	3929.78	-0.0550147	0.0896726	-0.613506	0.539542	0.806938	no	no
Rv1691	Rv1691	Conserved hypothetical protein	+	3183.55	-0.130718	0.0909064	-1.43794	0.150452	0.441515	no	no
Rv1692	Rv1692	Probable phosphatase	+	3193.86	-0.224474	0.0858876	-2.61358	0.00895983	0.0825143	no	no
Rv1693	Rv1693	Conserved hypothetical protein	+	1433.35	-0.0606576	0.0975357	-0.621901	0.534007	0.804006	no	no
tlyA	Rv1694	2'-O-methyltransferase TlyA	+	3453.08	0.0586967	0.0733929	0.79976	0.42385	0.728632	no	no
ppnK	Rv1695	Inorganic polyphosphate/ATP-NAD kinase PpnK (poly(P)/ATP NAD kinase)	+	4243.08	-0.0126946	0.0844993	-0.150233	0.880581	0.966782	no	no
recN	Rv1696	Probable DNA repair protein RecN (recombination protein N)	+	4300.11	-0.0434072	0.0921226	-0.47119	0.637505	0.857422	no	no
Rv1697	Rv1697	Conserved hypothetical protein	+	16109.4	0.0884154	0.126836	0.697082	0.485752	0.780166	no	no
mctB	Rv1698	Outer membrane protein MctB	+	7083.13	0.15803	0.0994991	1.58825	0.11223	0.378828	no	no
pyrG	Rv1699	Probable CTP synthase PyrG	+	15874.7	-0.0889034	0.091944	-0.966929	0.333579	0.658181	no	no
Rv1700	Rv1700	NUDIX hydrolase	+	4462.2	0.0148645	0.0682387	0.217832	0.82756	0.947992	no	no
Rv1701	Rv1701	Probable integrase/recombinase	+	4031.88	0.103233	0.0724498	1.42489	0.15419	0.445531	no	no
Rv1702c	Rv1702c	Conserved hypothetical protein	-	715.645	-0.0548344	0.135685	-0.404129	0.686118	0.883246	no	no
Rv1703c	Rv1703c	Probable catechol-O-methyltransferase	-	9827.13	-0.142813	0.122326	-1.16748	0.243018	0.559955	no	no
cycA	Rv1704c	Probable D-serine/alanine/glycine transporter protein CycA	-	9369.52	-0.132261	0.0990315	-1.33555	0.181698	0.483722	no	no
Rv1706A	Rv1706A	Conserved hypothetical protein	-	38.3705	-0.082877	0.415459	-0.199483	0.841885	0.953192	no	no
Rv1707	Rv1707	Probable conserved transmembrane protein	+	7167.79	-0.161501	0.107249	-1.50585	0.132106	0.416099	no	no
Rv1708	Rv1708	Putative initiation inhibitor protein	+	7875.14	-0.120512	0.0845527	-1.42529	0.154073	0.445531	no	no
scpA	Rv1709	Possible segregation and condensation protein ScpA	+	5117.93	-0.103078	0.0926927	-1.11204	0.266122	0.586572	no	no
scpB	Rv1710	Possible segregation and condensation protein ScpB	+	3102.17	-0.0374065	0.0765892	-0.488404	0.625264	0.85028	no	no
Rv1711	Rv1711	Conserved hypothetical protein	+	3088.78	0.00118938	0.0767083	0.0155053	0.987629	0.996423	no	no
cmk	Rv1712	Cytidylate kinase Cmk (CMP kinase) (cytidine monophosphate kinase) (ck)	+	2799.9	0.0730142	0.0659625	1.10691	0.268335	0.586826	no	no
engA	Rv1713	Probable GTP-binding protein EngA	+	4153.23	0.0110887	0.0915223	0.121159	0.903565	0.972495	no	no
Rv1714	Rv1714	Probable oxidoreductase	+	318.143	0.117562	0.183038	0.642282	0.52069	0.796884	no	no
fadB3	Rv1715	Probable 3-hydroxybutyryl-CoA dehydrogenase FadB3 (beta-hydroxybutyryl-CoA dehydrogenase) (BHBD)	+	367.892	-0.0211004	0.173969	-0.121288	0.903463	0.972495	no	no
Rv1716	Rv1716	Conserved hypothetical protein	+	800.259	-0.00762994	0.133428	-0.0571838	0.954399	0.9855	no	no
Rv1717	Rv1717	Conserved hypothetical protein	+	210.807	-0.166396	0.288557	-0.576648	0.564177	0.82467	no	no
Rv1718	Rv1718	Conserved hypothetical protein	+	817.776	0.0525098	0.14772	0.35547	0.722238	0.901351	no	no
Rv1719	Rv1719	Probable transcriptional regulatory protein	+	483.634	0.214491	0.200776	1.06831	0.28538	0.604552	no	no
vapC12	Rv1720c	Possible toxin VapC12	-	740.668	0.0351433	0.117192	0.299878	0.76427	0.918899	no	no
vapB12	Rv1721c	Possible antitoxin VapB12	-	332.997	-0.0989884	0.140944	-0.702324	0.482477	0.77624	no	no
Rv1722	Rv1722	Possible carboxylase	+	2873.95	0.151415	0.110665	1.36823	0.171239	0.470042	no	no
Rv1723	Rv1723	Probable hydrolase	+	850.772	0.194865	0.169857	1.14723	0.251286	0.571017	no	no
Rv1724c	Rv1724c	Hypothetical protein	-	1049.51	-0.0480221	0.107263	-0.447703	0.654368	0.866695	no	no
Rv1725c	Rv1725c	Conserved hypothetical protein	-	615.336	-0.133393	0.176762	-0.754644	0.450463	0.753256	no	no
Rv1726	Rv1726	Probable oxidoreductase	+	79.2624	0.486906	0.394905	1.23297	0.217587	0.531042	no	no
Rv1727	Rv1727	Conserved hypothetical protein	+	85.0175	0.273637	0.322852	0.847559	0.396683	0.706285	no	no
Rv1728c	Rv1728c	Conserved hypothetical protein	-	6919.76	-0.197573	0.0828542	-2.38459	0.0170982	0.12108	no	no
Rv1729c	Rv1729c	Possible S-adenosylmethionine-dependent methyltransferase	-	3147.07	-0.239682	0.0902868	-2.65468	0.00793837	0.0772957	no	no
Rv1730c	Rv1730c	Possible penicillin-binding protein	-	4100.31	-0.0936878	0.0998214	-0.938555	0.34796	0.67034	no	no
gabD2	Rv1731	Possible succinate-semialdehyde dehydrogenase [NADP+] dependent (SSDH) GabD2	+	5818.05	-0.116326	0.0603241	-1.92834	0.0538126	0.253407	no	no
Rv1732c	Rv1732c	Conserved protein	-	3421.11	-0.180483	0.109363	-1.65031	0.0988794	0.354128	no	no
Rv1733c	Rv1733c	Probable conserved transmembrane protein	-	70.5956	-0.324585	0.263209	-1.23319	0.217507	0.531042	no	no
Rv1734c	Rv1734c	Conserved hypothetical protein	-	30.8791	-0.133387	0.381531	-0.349609	0.726632	0.905068	no	no
Rv1735c	Rv1735c	Hypothetical membrane protein	-	75.5315	-0.453643	0.280956	-1.61464	0.106388	0.369347	no	no
narX	Rv1736c	Probable nitrate reductase NarX	-	456.994	-0.0583021	0.172728	-0.337537	0.735712	0.908968	no	no
narK2	Rv1737c	Possible nitrate/nitrite transporter NarK2	-	234.704	-0.477974	0.230889	-2.07015	0.0384386	0.20769	no	no
Rv1738	Rv1738	Conserved protein	+	1033.94	-0.490046	0.184051	-2.66256	0.00775486	0.0763026	no	no
Rv1739c	Rv1739c	Probable sulphate-transport transmembrane protein ABC transporter	-	1355.37	0.114206	0.134135	0.851431	0.39453	0.705813	no	no
vapB34	Rv1740	Possible antitoxin VapB34	+	1131.72	0.0836072	0.0887379	0.942181	0.3461	0.669942	no	no
vapC34	Rv1741	Possible toxin VapC34. Contains PIN domain.	+	1520.5	0.193622	0.092806	2.08631	0.0369507	0.203474	no	no
Rv1742	Rv1742	Unknown protein	+	1180.06	0.160657	0.156212	1.02845	0.303738	0.62429	no	no
pknE	Rv1743	Probable transmembrane serine/threonine-protein kinase E PknE (protein kinase E) (STPK E)	+	6173.71	0.0658957	0.0576826	1.14238	0.253295	0.572345	no	no
Rv1744c	Rv1744c	Probable membrane protein	-	396.174	0.00577594	0.153705	0.0375782	0.970024	0.988517	no	no
idi	Rv1745c	Probable isopentenyl-diphosphate delta-isomerase Idi (IPP isomerase) (isopentenyl pyrophosphate isomerase)	-	415.089	-0.000122267	0.127349	-0.000960091	0.999234	0.999391	no	no
pknF	Rv1746	Anchored-membrane serine/threonine-protein kinase PknF (protein kinase F) (STPK F)	+	4488.39	-0.0527024	0.0797679	-0.660697	0.508807	0.791776	no	no
Rv1747	Rv1747	Probable conserved transmembrane ATP-binding protein ABC transporter	+	18008.1	-0.144529	0.0839718	-1.72116	0.0852216	0.324154	no	no
Rv1748	Rv1748	Unknown protein	+	786.472	0.0330869	0.163483	0.202387	0.839614	0.952173	no	no
Rv1749c	Rv1749c	Possible integral membrane protein	-	4525.34	-0.16609	0.0960249	-1.72965	0.0836923	0.32062	no	no
fadD1	Rv1750c	Possible fatty-acid-CoA ligase FadD1 (fatty-acid-CoA synthetase) (fatty-acid-CoA synthase)	-	3632.1	-0.156003	0.109256	-1.42786	0.153332	0.445462	no	no
Rv1751	Rv1751	Probable oxidoreductase	+	9426.41	-0.111895	0.0657376	-1.70215	0.0887264	0.332929	no	no
Rv1752	Rv1752	Conserved hypothetical protein	+	1350.08	-0.188895	0.0861384	-2.19292	0.0283128	0.173673	no	no
Rv1754c	Rv1754c	Conserved protein	-	16343.1	0.00451325	0.101475	0.0444765	0.964525	0.988299	no	no
plcD	Rv1755c	Probable phospholipase C 4 (fragment) PlcD	-	1133.18	0.272954	0.153198	1.7817	0.0747978	0.301645	no	no
cut1	Rv1758	Probable cutinase Cut1	+	1373.43	-0.170177	0.105867	-1.60746	0.107954	0.372361	no	no
Rv1760	Rv1760	Possible triacylglycerol synthase (diacylglycerol acyltransferase)	+	2777.96	0.30356	0.0977457	3.10561	0.00189886	0.0280626	yes	no
Rv1761c	Rv1761c	Possible exported protein	-	1103.94	0.0916936	0.098195	0.933791	0.350412	0.671548	no	no
Rv1762c	Rv1762c	Unknown protein	-	4949.31	0.0761586	0.0703029	1.08329	0.278678	0.598151	no	no
Rv1765c	Rv1765c	Conserved hypothetical protein	-	2015.19	0.0997677	0.147802	0.675011	0.499669	0.784444	no	no
Rv1766	Rv1766	Conserved protein	+	1491.38	-0.158776	0.0781902	-2.03064	0.042292	0.217885	no	no
Rv1767	Rv1767	Conserved protein	+	643.249	0.00809744	0.133908	0.06047	0.951781	0.984974	no	no
Rv1769	Rv1769	Conserved protein	+	7327.02	0.187596	0.0878368	2.13574	0.0327007	0.189269	no	no
Rv1770	Rv1770	Conserved protein	+	10557.3	0.0903609	0.0940503	0.960772	0.336667	0.661133	no	no
Rv1771	Rv1771	L-gulono-1,4-lactone dehydrogenase	+	9754.95	0.12446	0.091039	1.36711	0.171591	0.470042	no	no
Rv1772	Rv1772	Hypothetical protein	+	3866.05	0.215815	0.142275	1.51689	0.129295	0.410735	no	no
Rv1773c	Rv1773c	Probable transcriptional regulatory protein	-	432.111	0.0796963	0.153093	0.520574	0.602664	0.842541	no	no
Rv1774	Rv1774	Probable oxidoreductase	+	2596.29	0.0135682	0.0975212	0.139131	0.889347	0.969183	no	no
Rv1775	Rv1775	Conserved hypothetical protein	+	2488.99	0.0828862	0.100881	0.821626	0.41129	0.718952	no	no
Rv1776c	Rv1776c	Possible transcriptional regulatory protein	-	429.835	0.141719	0.204472	0.693094	0.48825	0.780389	no	no
cyp144	Rv1777	Probable cytochrome P450 144 Cyp144	+	377.377	0.294776	0.20702	1.4239	0.154475	0.445847	no	no
Rv1778c	Rv1778c	Unknown protein	-	2093.92	-0.255496	0.0842881	-3.03122	0.0024357	0.0337299	yes	no
Rv1779c	Rv1779c	Possible integral membrane protein	-	3722.62	-0.418153	0.0873831	-4.78529	1.71e-06	9.82e-05	yes	no
Rv1780	Rv1780	Conserved protein	+	4169.7	0.0663323	0.117267	0.565653	0.57163	0.8277	no	no
malQ	Rv1781c	Probable 4-alpha-glucanotransferase MalQ (amylomaltase) (disproportionating enzyme) (D-enzyme)	-	1220.22	-0.0464998	0.133777	-0.347592	0.728146	0.905275	no	no
eccB5	Rv1782	ESX conserved component EccB5. ESX-5 type VII secretion system protein. Probable membrane protein.	+	12655.3	0.075302	0.0823729	0.914159	0.360633	0.679641	no	no
eccC5	Rv1783	ESX conserved component EccC5. ESX-5 type VII secretion system protein.	+	38945.4	0.0347662	0.0880231	0.394967	0.692867	0.885383	no	no
cyp143	Rv1785c	Probable cytochrome P450 143 Cyp143	-	1535.89	0.00141417	0.110564	0.0127905	0.989795	0.997086	no	no
Rv1786	Rv1786	Probable ferredoxin	+	846.276	0.0830774	0.0978153	0.849329	0.395698	0.706098	no	no
esxM	Rv1792	ESAT-6 like protein EsxM	+	11498.8	0.133221	0.145347	0.916571	0.359368	0.678269	no	no
esxN	Rv1793	Putative ESAT-6 like protein EsxN (ESAT-6 like protein 5)	+	9827.36	0.153567	0.178443	0.860595	0.389461	0.701607	no	no
Rv1794	Rv1794	Conserved protein	+	16007.5	0.152433	0.116433	1.30918	0.190472	0.495255	no	no
eccD5	Rv1795	ESX conserved component EccD5. ESX-5 type VII secretion system protein. Probable membrane protein.	+	9511.34	0.092982	0.0702634	1.32334	0.185724	0.488685	no	no
mycP5	Rv1796	Probable proline rich membrane-anchored mycosin MycP5 (serine protease) (subtilisin-like protease) (subtilase-like) (mycosin-5)	+	15660.5	0.0685095	0.100047	0.684772	0.493488	0.781844	no	no
eccE5	Rv1797	ESX conserved component EccE5. ESX-5 type VII secretion system protein. Probable membrane protein.	+	9329.67	0.0975808	0.080531	1.21172	0.225621	0.539419	no	no
eccA5	Rv1798	ESX conserved component EccA5. ESX-5 type VII secretion system protein.	+	10561.2	0.187682	0.0708904	2.6475	0.00810897	0.0787518	no	no
lppT	Rv1799	Probable lipoprotein LppT	+	262.577	0.554943	0.179645	3.08911	0.0020076	0.0293219	yes	no
Rv1804c	Rv1804c	Conserved protein	-	239.745	0.218172	0.176944	1.233	0.217575	0.531042	no	no
Rv1805c	Rv1805c	Hypothetical protein	-	31.5821	0.0490513	0.402952	0.12173	0.903113	0.972495	no	no
Rv1810	Rv1810	Conserved protein	+	3378.33	-0.0495089	0.0973863	-0.508376	0.611189	0.846698	no	no
mgtC	Rv1811	Possible Mg2+ transport P-type ATPase C MgtC	+	1373.78	-0.107995	0.109384	-0.987295	0.323498	0.646132	no	no
Rv1812c	Rv1812c	Probable dehydrogenase	-	4240.72	-0.226032	0.0747471	-3.02396	0.00249486	0.0342951	yes	no
erg3	Rv1814	Membrane-bound C-5 sterol desaturase Erg3 (sterol-C5-desaturase)	+	2322.18	0.0654334	0.0917496	0.713174	0.475738	0.771891	no	no
Rv1815	Rv1815	Conserved protein	+	16061.8	-0.0829475	0.168153	-0.493286	0.621811	0.849763	no	no
Rv1816	Rv1816	Possible transcriptional regulatory protein	+	6149.22	-0.0855313	0.0945297	-0.904808	0.365567	0.683216	no	no
Rv1817	Rv1817	Possible flavoprotein	+	3176.01	0.103439	0.110818	0.933417	0.350605	0.671573	no	no
bacA	Rv1819c	Probable drug-transport transmembrane ATP-binding protein ABC transporter BacA	-	4673.94	0.0656939	0.0791757	0.829724	0.406695	0.714583	no	no
ilvG	Rv1820	Probable acetolactate synthase IlvG (acetohydroxy-acid synthase)(ALS)	+	3208.93	0.173805	0.0650149	2.67331	0.00751066	0.074489	no	no
secA2	Rv1821	Possible preprotein translocase ATPase SecA2	+	19934.7	-0.118834	0.0895536	-1.32696	0.184522	0.487905	no	no
pgsA2	Rv1822	Probable CDP-diacylglycerol--glycerol-3-phosphate 3-phosphatidyltransferase PgsA2 (PGP synthase) (phosphatidylglycerophosphate synthase) (3-phosphatidyl-1'-glycerol-3'phosphate synthase)	+	1976.58	-0.0121354	0.082218	-0.147601	0.882658	0.96725	no	no
Rv1823	Rv1823	Conserved protein	+	2949.75	-0.0557244	0.0664165	-0.839014	0.401462	0.71041	no	no
Rv1824	Rv1824	Conserved hypothetical membrane protein	+	2179.84	0.0762797	0.098095	0.77761	0.436799	0.739037	no	no
Rv1825	Rv1825	Conserved protein	+	5822.4	0.0292565	0.0581724	0.502927	0.615016	0.849167	no	no
gcvH	Rv1826	Probable glycine cleavage system H protein GcvH	+	6889.42	0.0356549	0.119682	0.297914	0.765769	0.918899	no	no
garA	Rv1827	Conserved protein with FHA domain, GarA	+	14680.9	0.0238803	0.179652	0.132925	0.894252	0.971135	no	no
Rv1828	Rv1828	Conserved protein	+	9007.63	0.00672882	0.128765	0.0522566	0.958324	0.986557	no	no
Rv1829	Rv1829	Conserved protein	+	5863.28	0.0979711	0.114419	0.856248	0.391861	0.703393	no	no
Rv1830	Rv1830	Conserved hypothetical protein	+	10503.7	0.0407875	0.1208	0.337644	0.735632	0.908968	no	no
Rv1831	Rv1831	Hypothetical protein	+	5853.5	-0.125077	0.153673	-0.813916	0.415693	0.721763	no	no
gcvB	Rv1832	Probable glycine dehydrogenase GcvB (glycine decarboxylase) (glycine cleavage system P-protein)	+	9980.84	-0.145059	0.064373	-2.25341	0.0242333	0.155417	no	no
Rv1833c	Rv1833c	Possible haloalkane dehalogenase	-	1503.41	0.211063	0.12723	1.65891	0.0971332	0.350523	no	no
lipZ	Rv1834	Probable hydrolase	+	539.237	0.273237	0.142156	1.92209	0.0545946	0.254525	no	no
Rv1835c	Rv1835c	Conserved hypothetical protein	-	3503.3	-0.188787	0.093877	-2.01101	0.0443249	0.224264	no	no
Rv1836c	Rv1836c	Conserved protein	-	20794.1	-0.195516	0.111479	-1.75385	0.0794569	0.312726	no	no
glcB	Rv1837c	Malate synthase G GlcB	-	32390.1	-0.217558	0.0948925	-2.29268	0.0218667	0.144451	no	no
vapC13	Rv1838c	Possible toxin VapC13	-	1527.64	-0.252353	0.0939551	-2.68589	0.00723366	0.0727061	no	no
vapB13	Rv1839c	Possible antitoxin VapB13	-	1109.88	-0.196695	0.122999	-1.59916	0.109786	0.37576	no	no
Rv1841c	Rv1841c	Conserved hypothetical membrane protein	-	2091.73	0.0627024	0.0933423	0.671747	0.501745	0.784947	no	no
Rv1842c	Rv1842c	Conserved hypothetical membrane protein	-	4022.23	0.0399507	0.0796964	0.501286	0.61617	0.849763	no	no
guaB1	Rv1843c	Probable inosine-5'-monophosphate dehydrogenase GuaB1(imp dehydrogenase) (IMPDH) (IMPD)	-	8193.78	0.0447088	0.0694063	0.644161	0.519471	0.796884	no	no
gnd1	Rv1844c	Probable 6-phosphogluconate dehydrogenase Gnd1	-	7981.4	0.0182	0.0656611	0.27718	0.781642	0.926913	no	no
blaR	Rv1845c	Possible sensor-transducer protein BlaR	-	2780.47	0.0706571	0.0767059	0.921143	0.356976	0.677185	no	no
blaI	Rv1846c	Transcriptional repressor BlaI	-	3592.82	-0.129973	0.114771	-1.13245	0.257446	0.576746	no	no
Rv1847	Rv1847	Conserved protein	+	1745.41	-0.0254084	0.0989665	-0.256737	0.797382	0.935272	no	no
ureA	Rv1848	Urease gamma subunit UreA (urea amidohydrolase)	+	1778.07	-0.0596662	0.111217	-0.536483	0.591625	0.837594	no	no
ureB	Rv1849	Urease beta subunit UreB (urea amidohydrolase)	+	693.375	-0.0550544	0.163212	-0.337318	0.735878	0.908968	no	no
ureC	Rv1850	Urease alpha subunit UreC (urea amidohydrolase)	+	3788.75	-0.0272693	0.0796632	-0.342308	0.732119	0.907206	no	no
ureF	Rv1851	Urease accessory protein UreF	+	658.933	-0.0719219	0.141448	-0.50847	0.611124	0.846698	no	no
ureG	Rv1852	Urease accessory protein UreG	+	1019.47	0.102756	0.12868	0.798537	0.424559	0.729166	no	no
ureD	Rv1853	Probable urease accessory protein UreD	+	1110.19	0.0294085	0.088289	0.333094	0.739063	0.909897	no	no
ndh	Rv1854c	Probable NADH dehydrogenase Ndh	-	5163.9	-0.112597	0.0794409	-1.41736	0.156377	0.446671	no	no
Rv1855c	Rv1855c	Possible oxidoreductase	-	4100.05	-0.153779	0.0691025	-2.22537	0.0260564	0.163276	no	no
Rv1856c	Rv1856c	Possible oxidoreductase	-	3198.54	-0.718992	0.0743408	-9.67157	3.98e-22	1.24e-19	yes	no
modA	Rv1857	Probable molybdate-binding lipoprotein ModA	+	1966.24	-0.397403	0.0789651	-5.03263	4.84e-07	3.29e-05	yes	no
modB	Rv1858	Probable molybdenum-transport integral membrane protein ABC transporter ModB	+	254.479	-0.109782	0.186358	-0.589089	0.555802	0.821105	no	no
modC	Rv1859	Probable molybdenum-transport ATP-binding protein ABC transporter ModC	+	1714.91	-0.0968364	0.100719	-0.961447	0.336327	0.660929	no	no
apa	Rv1860	Alanine and proline rich secreted protein Apa (fibronectin attachment protein) (immunogenic protein MPT32) (antigen MPT-32) (45-kDa glycoprotein) (45/47 kDa antigen)	+	9351.71	-0.162816	0.151036	-1.07799	0.281037	0.600799	no	no
Rv1861	Rv1861	Probable conserved transmembrane protein	+	1478.84	0.18289	0.106473	1.71772	0.085848	0.325543	no	no
adhA	Rv1862	Probable alcohol dehydrogenase AdhA	+	2457.58	0.194931	0.0950206	2.05146	0.0402223	0.212621	no	no
Rv1863c	Rv1863c	Probable conserved integral membrane protein	-	5136.32	-0.113922	0.100754	-1.1307	0.258183	0.577016	no	no
Rv1864c	Rv1864c	Conserved protein	-	1532.2	0.0731534	0.125039	0.585045	0.558517	0.822285	no	no
Rv1865c	Rv1865c	Probable short-chain type dehydrogenase	-	1351.84	-0.023316	0.118373	-0.196971	0.84385	0.953759	no	no
Rv1866	Rv1866	Conserved protein	+	3356.96	-0.0223924	0.0896398	-0.249804	0.802739	0.938831	no	no
Rv1867	Rv1867	Conserved protein	+	2335.66	0.0202479	0.0863383	0.234519	0.814582	0.945877	no	no
Rv1868	Rv1868	Conserved hypothetical protein	+	3750.45	0.274294	0.0948912	2.89062	0.00384484	0.047134	yes	no
Rv1869c	Rv1869c	Probable reductase	-	6757.42	-0.144453	0.0784339	-1.84172	0.0655164	0.281247	no	no
Rv1870c	Rv1870c	Conserved hypothetical protein	-	7672.56	0.0361563	0.114986	0.31444	0.753187	0.91434	no	no
Rv1871c	Rv1871c	Conserved protein	-	25679.7	-0.0277262	0.234526	-0.118222	0.905891	0.972495	no	no
lldD2	Rv1872c	Possible L-lactate dehydrogenase (cytochrome) LldD2	-	57854	0.0671689	0.227141	0.295715	0.767448	0.919118	no	no
Rv1873	Rv1873	Conserved hypothetical protein	+	363.912	-0.041556	0.175906	-0.23624	0.813246	0.944912	no	no
Rv1874	Rv1874	Unknown protein	+	1821.54	0.0581898	0.0918542	0.633501	0.526406	0.799302	no	no
Rv1875	Rv1875	Conserved protein	+	2077.86	-0.00348831	0.0693255	-0.0503179	0.959869	0.986789	no	no
bfrA	Rv1876	Probable bacterioferritin BfrA	+	8188.8	-0.018079	0.141554	-0.127718	0.898372	0.972335	no	no
Rv1877	Rv1877	Probable conserved integral membrane protein	+	5101.29	0.0190346	0.0777713	0.244751	0.806649	0.941478	no	no
Rv1879	Rv1879	Conserved hypothetical protein	+	880.875	-0.0349072	0.128594	-0.271454	0.786042	0.928923	no	no
cyp140	Rv1880c	Probable cytochrome P450 140 Cyp140	-	10487	0.0385731	0.0742895	0.519226	0.603603	0.842541	no	no
lppE	Rv1881c	Possible conserved lipoprotein LppE	-	4481.41	0.110642	0.113137	0.977951	0.328098	0.650669	no	no
Rv1882c	Rv1882c	Probable short-chain type dehydrogenase/reductase	-	5280.66	-0.00531815	0.0773617	-0.0687439	0.945193	0.983327	no	no
Rv1883c	Rv1883c	Conserved hypothetical protein	-	14406.5	-0.0855263	0.152564	-0.560593	0.575075	0.830195	no	no
rpfC	Rv1884c	Probable resuscitation-promoting factor RpfC	-	19668.8	-0.0991883	0.227229	-0.436513	0.662465	0.870776	no	no
Rv1885c	Rv1885c	Chorismate mutase	-	4754.74	0.0779026	0.11431	0.681501	0.495554	0.782754	no	no
fbpB	Rv1886c	Secreted antigen 85-B FbpB (85B) (antigen 85 complex B) (mycolyl transferase 85B) (fibronectin-binding protein B) (extracellular alpha-antigen)	-	16222.7	-0.00324096	0.166273	-0.0194918	0.984449	0.994825	no	no
Rv1887	Rv1887	Hypothetical protein	+	14210.2	-0.151274	0.119201	-1.26907	0.204416	0.516776	no	no
Rv1888c	Rv1888c	Possible transmembrane protein	-	1154.27	-0.0868973	0.180953	-0.480219	0.631071	0.854447	no	no
Rv1888A	Rv1888A	Conserved hypothetical protein	-	339.159	0.073362	0.13642	0.537767	0.590738	0.837594	no	no
Rv1889c	Rv1889c	Conserved hypothetical protein	-	548.026	0.0683293	0.148087	0.461415	0.644501	0.861292	no	no
Rv1890c	Rv1890c	Hypothetical protein	-	731.644	0.124726	0.123367	1.01102	0.312006	0.633348	no	no
Rv1891	Rv1891	Conserved protein	+	4265.72	0.045389	0.148589	0.305467	0.76001	0.918184	no	no
Rv1892	Rv1892	Probable membrane protein	+	2348.82	0.0890348	0.102771	0.866342	0.386302	0.701199	no	no
Rv1893	Rv1893	Conserved hypothetical protein	+	2934.33	0.0572292	0.116651	0.490603	0.623708	0.85028	no	no
Rv1894c	Rv1894c	Conserved hypothetical protein	-	2198.74	-0.0199911	0.11905	-0.167922	0.866645	0.960683	no	no
Rv1895	Rv1895	Possible dehydrogenase	+	1158.95	-0.0494387	0.0996327	-0.496209	0.619747	0.849763	no	no
Rv1896c	Rv1896c	Conserved hypothetical protein	-	2810.21	-0.109229	0.0786111	-1.38949	0.164685	0.461656	no	no
Rv1897c	Rv1897c	Conserved hypothetical protein	-	782.852	-0.0904337	0.151259	-0.597875	0.549924	0.816849	no	no
Rv1898	Rv1898	Conserved hypothetical protein	+	1656.01	0.0616412	0.0872686	0.70634	0.479977	0.775131	no	no
lppD	Rv1899c	Possible lipoprotein LppD	-	6073.75	-0.0544032	0.0832282	-0.653663	0.513329	0.79377	no	no
lipJ	Rv1900c	Probable lignin peroxidase LipJ	-	4021.96	0.0743299	0.0715417	1.03897	0.298817	0.618991	no	no
cinA	Rv1901	Probable CinA-like protein CinA	+	8549.63	-0.11007	0.0653589	-1.68409	0.0921648	0.339846	no	no
nanT	Rv1902c	Probable sialic acid-transport integral membrane protein NanT	-	1473.21	0.118579	0.0989472	1.19841	0.230759	0.545735	no	no
Rv1903	Rv1903	Probable conserved membrane protein	+	1838.45	0.215843	0.108236	1.99419	0.0461308	0.229366	no	no
Rv1904	Rv1904	Conserved hypothetical protein	+	5728.25	0.112964	0.138009	0.81853	0.413055	0.720005	no	no
aao	Rv1905c	Probable D-amino acid oxidase Aao	-	3998.88	0.0679879	0.0956471	0.71082	0.477196	0.771891	no	no
Rv1906c	Rv1906c	Conserved protein	-	7674.86	0.0367022	0.136279	0.269316	0.787686	0.93005	no	no
Rv1907c	Rv1907c	Hypothetical protein	-	1108.23	0.106198	0.129486	0.820148	0.412132	0.719402	no	no
katG	Rv1908c	Catalase-peroxidase-peroxynitritase T KatG	-	20807.7	0.0557063	0.0862228	0.646074	0.518232	0.79647	no	no
furA	Rv1909c	Ferric uptake regulation protein FurA (fur)	-	2150.12	-0.00908117	0.0827406	-0.109755	0.912604	0.973607	no	no
Rv1910c	Rv1910c	Probable exported protein	-	1918.65	-0.169425	0.0811539	-2.0877	0.0368252	0.203082	no	no
lppC	Rv1911c	Probable lipoprotein LppC	-	5336.62	-0.203914	0.0634917	-3.21166	0.0013197	0.0215527	yes	no
fadB5	Rv1912c	Possible oxidoreductase FadB5	-	4671.46	-0.186386	0.0834324	-2.23397	0.0254849	0.160959	no	no
Rv1913	Rv1913	Conserved hypothetical protein	+	1228.4	-0.163086	0.113167	-1.44112	0.149552	0.440295	no	no
Rv1914c	Rv1914c	Unknown protein	-	1861.4	-0.199191	0.080507	-2.47421	0.0133532	0.107141	no	no
aceAa	Rv1915	Probable isocitrate lyase AceAa [first part] (isocitrase) (isocitratase) (Icl)	+	10359.8	-0.128566	0.0753088	-1.70719	0.0877868	0.3307	no	no
aceAb	Rv1916	Probable isocitrate lyase AceAb [second part] (isocitrase) (isocitratase) (Icl)	+	14535.5	-0.179133	0.109644	-1.63377	0.102308	0.361217	no	no
Rv1919c	Rv1919c	Conserved protein	-	7379.59	-0.105777	0.11726	-0.902078	0.367016	0.683742	no	no
Rv1920	Rv1920	Probable membrane protein	+	2719.12	0.0879194	0.0875255	1.0045	0.315137	0.63623	no	no
lppF	Rv1921c	Probable conserved lipoprotein LppF	-	826.321	0.0173553	0.130084	0.133416	0.893864	0.971135	no	no
Rv1922	Rv1922	Probable conserved lipoprotein	+	3183.97	-0.0378153	0.0902478	-0.419017	0.675204	0.877533	no	no
lipD	Rv1923	Probable lipase LipD	+	7324.16	-0.144665	0.0971822	-1.4886	0.136594	0.423401	no	no
Rv1924c	Rv1924c	Unknown protein	-	1103.79	-0.149586	0.113168	-1.3218	0.186235	0.489684	no	no
fadD31	Rv1925	Probable acyl-CoA ligase FadD31 (acyl-CoA synthetase) (acyl-CoA synthase)	+	41138.6	-0.162785	0.162701	-1.00052	0.317061	0.638734	no	no
mpt63	Rv1926c	Immunogenic protein Mpt63 (antigen Mpt63/MPB63) (16 kDa immunoprotective extracellular protein)	-	5223.11	0.170327	0.136608	1.24683	0.212459	0.526082	no	no
Rv1927	Rv1927	Conserved hypothetical protein	+	2000.76	-0.000843678	0.0829378	-0.0101724	0.991884	0.998292	no	no
Rv1928c	Rv1928c	Probable short-chain type dehydrogenase/reductase	-	946.974	-0.0852546	0.140403	-0.607215	0.543708	0.811547	no	no
Rv1929c	Rv1929c	Conserved hypothetical protein	-	2037.13	-0.310555	0.0944888	-3.28669	0.00101372	0.0183106	yes	no
Rv1930c	Rv1930c	Conserved hypothetical protein	-	198.369	0.0766069	0.201122	0.380897	0.703279	0.890768	no	no
Rv1931c	Rv1931c	Probable transcriptional regulatory protein	-	474.968	0.0824909	0.189041	0.436365	0.662572	0.870776	no	no
tpx	Rv1932	Probable thiol peroxidase Tpx	+	6633.43	-0.297147	0.12009	-2.47437	0.0133472	0.107141	no	no
fadE18	Rv1933c	Probable acyl-CoA dehydrogenase FadE18	-	136.093	0.191062	0.223477	0.854951	0.392578	0.704333	no	no
fadE17	Rv1934c	Probable acyl-CoA dehydrogenase FadE17	-	178.119	0.408537	0.254739	1.60374	0.10877	0.373455	no	no
echA13	Rv1935c	Possible enoyl-CoA hydratase EchA13 (enoyl hydrase) (unsaturated acyl-CoA hydratase) (crotonase)	-	259.337	0.290427	0.187114	1.55214	0.120629	0.393569	no	no
Rv1936	Rv1936	Possible monooxygenase	+	560.468	0.157486	0.142022	1.10889	0.267479	0.586826	no	no
Rv1937	Rv1937	Possible oxygenase	+	1266.15	0.0594979	0.121468	0.489825	0.624258	0.85028	no	no
ephB	Rv1938	Probable epoxide hydrolase EphB (epoxide hydratase)	+	540.909	0.158098	0.182089	0.868248	0.385258	0.700844	no	no
Rv1939	Rv1939	Probable oxidoreductase	+	194.067	0.253064	0.257448	0.982971	0.325622	0.648296	no	no
ribA1	Rv1940	Probable riboflavin biosynthesis protein RibA1 (GTP cyclohydrolase II)	+	445.812	0.239481	0.154661	1.54843	0.121519	0.39488	no	no
Rv1941	Rv1941	Probable short-chain type dehydrogenase/reductase	+	1540.74	0.027145	0.0818933	0.331468	0.740291	0.91051	no	no
mazF5	Rv1942c	Possible toxin MazF5	-	2025.03	-0.170327	0.0759038	-2.24399	0.0248333	0.157911	no	no
mazE5	Rv1943c	Possible antitoxin MazE5	-	1837.13	-0.158164	0.0865136	-1.8282	0.06752	0.284941	no	no
lppG	Rv1946c	Possible lipoprotein	-	164.767	-0.121009	0.253507	-0.477339	0.633121	0.855265	no	no
Rv1947	Rv1947	Hypothetical protein	+	1257.18	-0.292391	0.120879	-2.41887	0.0155689	0.115272	no	no
Rv1948c	Rv1948c	Hypothetical protein	-	563.328	0.138528	0.152664	0.907407	0.364192	0.682537	no	no
Rv1949c	Rv1949c	Conserved hypothetical protein	-	1124.32	-0.00410561	0.100798	-0.0407313	0.96751	0.988299	no	no
Rv1950c	Rv1950c	Conserved hypothetical protein	-	1275.88	-0.126056	0.0876849	-1.4376	0.150547	0.441515	no	no
Rv1951c	Rv1951c	Conserved hypothetical protein	-	1159.88	-0.144538	0.116747	-1.23805	0.215698	0.529892	no	no
vapB14	Rv1952	Possible antitoxin VapB14	+	723.398	-0.0411666	0.217457	-0.189309	0.84985	0.958148	no	no
vapC14	Rv1953	Possible toxin VapC14	+	1204.63	0.0533253	0.101251	0.526666	0.598425	0.840941	no	no
Rv1954c	Rv1954c	Hypothetical protein	-	147.09	-0.100105	0.179658	-0.557198	0.577392	0.830625	no	no
Rv1954A	Rv1954A	Hypothetical protein	+	2294.31	0.0132226	0.117287	0.112737	0.910239	0.973488	no	no
higB	Rv1955	Possible toxin HigB	+	1117.76	0.0354664	0.154776	0.229146	0.818755	0.945977	no	no
higA	Rv1956	Possible antitoxin HigA	+	1652.99	-0.197114	0.097778	-2.01593	0.0438071	0.222547	no	no
Rv1957	Rv1957	Hypothetical protein	+	4352.69	-0.157146	0.0717121	-2.19135	0.0284267	0.173673	no	no
Rv1958c	Rv1958c	Hypothetical protein	-	298.924	-0.234646	0.153634	-1.5273	0.126685	0.407639	no	no
parE1	Rv1959c	Possible toxin ParE1	-	1929.17	-0.0627889	0.0993019	-0.632304	0.527188	0.799302	no	no
parD1	Rv1960c	Possible antitoxin ParD1	-	1243.85	0.0188355	0.135733	0.138769	0.889632	0.969212	no	no
Rv1961	Rv1961	Hypothetical protein	+	314.146	0.150503	0.135775	1.10847	0.267658	0.586826	no	no
vapC35	Rv1962c	Possible toxin VapC35. Contains PIN domain.	-	1920.52	-0.170152	0.103771	-1.6397	0.101068	0.359155	no	no
vapB35	Rv1962A	Possible antitoxin VapB35	-	1664.69	-0.0632764	0.10011	-0.632071	0.527341	0.799302	no	no
mce3R	Rv1963c	Probable transcriptional repressor (probably TetR-family) Mce3R	-	2146.56	0.152874	0.119522	1.27905	0.200881	0.511536	no	no
yrbE3A	Rv1964	Conserved hypothetical integral membrane protein YrbE3A	+	307.91	0.456862	0.140602	3.24933	0.00115676	0.0201168	yes	no
yrbE3B	Rv1965	Conserved hypothetical integral membrane protein YrbE3B	+	256.471	0.381531	0.181443	2.10276	0.0354865	0.197517	no	no
mce3A	Rv1966	Mce-family protein Mce3A	+	407.85	0.316904	0.185636	1.70712	0.0877991	0.3307	no	no
mce3B	Rv1967	Mce-family protein Mce3B	+	196.879	0.121852	0.243312	0.500806	0.616508	0.849763	no	no
mce3C	Rv1968	Mce-family protein Mce3C	+	228.177	0.413605	0.202013	2.04742	0.0406173	0.213834	no	no
mce3D	Rv1969	Mce-family protein Mce3D	+	316.602	0.375524	0.194	1.93569	0.0529051	0.250822	no	no
lprM	Rv1970	Possible Mce-family lipoprotein LprM (Mce-family lipoprotein Mce3E)	+	286.47	0.417632	0.204226	2.04495	0.04086	0.214573	no	no
mce3F	Rv1971	Mce-family protein Mce3F	+	471.475	0.337309	0.175929	1.9173	0.0551993	0.256385	no	no
Rv1972	Rv1972	Probable conserved Mce associated membrane protein	+	127.623	0.17208	0.218777	0.786554	0.431543	0.734763	no	no
Rv1973	Rv1973	Possible conserved Mce associated membrane protein	+	155.17	0.262056	0.2399	1.09235	0.274679	0.594271	no	no
Rv1974	Rv1974	Probable conserved membrane protein	+	132.627	0.408554	0.18928	2.15846	0.0308923	0.183053	no	no
Rv1975	Rv1975	Conserved hypothetical protein	+	357.809	0.19752	0.145776	1.35496	0.175431	0.474086	no	no
Rv1976c	Rv1976c	Conserved hypothetical protein	-	710.777	0.106348	0.103803	1.02451	0.305592	0.624355	no	no
Rv1977	Rv1977	Conserved protein	+	1998.89	0.237145	0.0995113	2.3831	0.0171674	0.12134	no	no
Rv1978	Rv1978	Conserved protein	+	3786.26	-0.124413	0.0877084	-1.41848	0.156051	0.446449	no	no
Rv1979c	Rv1979c	Possible conserved permease	-	3941.94	-0.0451116	0.0907917	-0.496869	0.619282	0.849763	no	no
mpt64	Rv1980c	Immunogenic protein Mpt64 (antigen Mpt64/MPB64)	-	14297	-0.234816	0.121227	-1.937	0.0527457	0.250822	no	no
nrdF1	Rv1981c	Ribonucleoside-diphosphate reductase (beta chain) NrdF1 (ribonucleotide reductase small subunit) (R2F protein)	-	8488.74	0.118238	0.100242	1.17953	0.238189	0.553504	no	no
vapC36	Rv1982c	Possible toxin VapC36. Contains PIN domain.	-	1893	-0.0933128	0.0763441	-1.22227	0.221607	0.534972	no	no
vapB36	Rv1982A	Possible antitoxin VapB36	-	1569.91	-0.0602217	0.113002	-0.532924	0.594086	0.838856	no	no
cfp21	Rv1984c	Probable cutinase precursor CFP21	-	3495.74	0.00129873	0.0731623	0.0177513	0.985837	0.995421	no	no
Rv1985c	Rv1985c	Probable transcriptional regulatory protein (probably LysR-family)	-	920.529	0.0421634	0.140918	0.299205	0.764783	0.918899	no	no
Rv1986	Rv1986	Probable conserved integral membrane protein	+	760.817	-0.104995	0.110177	-0.95296	0.340611	0.664303	no	no
Rv1987	Rv1987	Possible chitinase	+	9338.06	-0.181302	0.17025	-1.06492	0.286914	0.605778	no	no
erm(37)	Rv1988	Probable 23S rRNA methyltransferase Erm(37)	+	3024.49	-0.0410184	0.138626	-0.295892	0.767312	0.919118	no	no
Rv1989c	Rv1989c	Hypothetical protein	-	2410.95	0.164555	0.0757801	2.17148	0.0298953	0.17921	no	no
Rv1990c	Rv1990c	Probable transcriptional regulatory protein	-	1857.48	0.131296	0.0785426	1.67166	0.0945917	0.344716	no	no
Rv1990A	Rv1990A	Possible dehydrogenase (fragment)	-	306.273	0.305846	0.201518	1.51771	0.129087	0.410735	no	no
mazF6	Rv1991c	Toxin MazF6	-	849.37	0.0387233	0.117245	0.330278	0.74119	0.910836	no	no
mazE6	Rv1991A	Antitoxin MazE6	-	837.724	-0.0155306	0.12187	-0.127436	0.898595	0.972335	no	no
ctpG	Rv1992c	Probable metal cation transporter P-type ATPase G CtpG	-	3031.01	0.0894338	0.103962	0.860252	0.38965	0.701607	no	no
Rv1993c	Rv1993c	Conserved protein	-	624.793	0.192049	0.128253	1.49742	0.134284	0.41868	no	no
cmtR	Rv1994c	Metal sensor transcriptional regulator CmtR (ArsR-SmtB family)	-	1097.1	0.102512	0.107337	0.955049	0.339553	0.663624	no	no
Rv1995	Rv1995	Unknown protein	+	545.497	0.140202	0.198838	0.705107	0.480744	0.775345	no	no
Rv1996	Rv1996	Universal stress protein family protein	+	897.025	-0.113503	0.131958	-0.860147	0.389708	0.701607	no	no
ctpF	Rv1997	Probable metal cation transporter P-type ATPase A CtpF	+	782.89	-0.0688238	0.151265	-0.454988	0.649118	0.864643	no	no
Rv1998c	Rv1998c	Conserved protein	-	2056.34	-0.234971	0.113923	-2.06253	0.0391571	0.210055	no	no
Rv1999c	Rv1999c	Probable conserved integral membrane protein	-	137.815	0.331232	0.241824	1.36972	0.170773	0.469182	no	no
Rv2000	Rv2000	Unknown protein	+	4221.03	-0.269648	0.0777939	-3.46618	0.000527905	0.011215	yes	no
Rv2001	Rv2001	Conserved hypothetical protein	+	3167.49	-0.323793	0.0805511	-4.01972	5.83e-05	0.00191107	yes	no
fabG3	Rv2002	Possible 20-beta-hydroxysteroid dehydrogenase FabG3 (cortisone reductase) ((R)-20-hydroxysteroid dehydrogenase)	+	3440.17	-0.14619	0.0619443	-2.36002	0.0182741	0.126766	no	no
Rv2003c	Rv2003c	Conserved hypothetical protein	-	727.666	-0.117485	0.130492	-0.900321	0.367949	0.684119	no	no
Rv2004c	Rv2004c	Conserved protein	-	1426.82	0.0505751	0.129675	0.390015	0.696525	0.887631	no	no
Rv2005c	Rv2005c	Universal stress protein family protein	-	1183.15	0.0644113	0.173841	0.370519	0.710996	0.894567	no	no
otsB1	Rv2006	Probable trehalose-6-phosphate phosphatase OtsB1 (trehalose-phosphatase) (TPP)	+	4001.09	-0.11894	0.131396	-0.905205	0.365357	0.683216	no	no
fdxA	Rv2007c	Ferredoxin FdxA	-	870.138	-0.518275	0.198089	-2.61637	0.00888699	0.0825042	no	no
Rv2008c	Rv2008c	Conserved hypothetical protein	-	1046.53	-0.188476	0.125123	-1.50633	0.131983	0.416099	no	no
vapB15	Rv2009	Antitoxin VapB15	+	1792.3	-0.42423	0.174742	-2.42775	0.0151926	0.114508	no	no
vapC15	Rv2010	Toxin VapC15	+	3068.39	-0.455174	0.0916709	-4.96531	6.86e-07	4.27e-05	yes	no
Rv2011c	Rv2011c	Conserved hypothetical protein, probable transcription repressor.	-	396.573	-0.120538	0.187758	-0.641983	0.520884	0.796884	no	no
Rv2012	Rv2012	Conserved hypothetical protein	+	697.688	-0.14529	0.0983957	-1.47659	0.139785	0.426309	no	no
Rv2015c	Rv2015c	Conserved hypothetical protein	-	4325.12	0.0365918	0.0762446	0.479927	0.631279	0.854447	no	no
Rv2016	Rv2016	Hypothetical protein	+	1277.41	-0.0733443	0.108077	-0.678627	0.497374	0.782754	no	no
Rv2017	Rv2017	Transcriptional regulatory protein	+	885.047	-0.0909566	0.0990396	-0.918386	0.358417	0.678269	no	no
Rv2018	Rv2018	Conserved protein	+	1629.28	0.156932	0.11188	1.40269	0.160711	0.454536	no	no
Rv2019	Rv2019	Conserved protein	+	824.255	0.173112	0.118117	1.4656	0.142757	0.431852	no	no
Rv2020c	Rv2020c	Conserved hypothetical protein	-	3451.75	0.033896	0.068826	0.492488	0.622374	0.850222	no	no
Rv2021c	Rv2021c	Transcriptional regulatory protein	-	3352.42	0.0556996	0.0789495	0.70551	0.480493	0.775345	no	no
Rv2022c	Rv2022c	Conserved protein	-	2652.5	0.0744897	0.109339	0.681276	0.495697	0.782754	no	no
Rv2023c	Rv2023c	Hypothetical protein	-	513.928	0.296095	0.169731	1.7445	0.0810723	0.316419	no	no
Rv2023A	Rv2023A	Hypothetical protein, pseudogene	-	3123.92	0.195417	0.103041	1.8965	0.0578946	0.263913	no	no
Rv2024c	Rv2024c	Conserved hypothetical protein	-	4688.68	0.100835	0.0640506	1.5743	0.115418	0.384532	no	no
Rv2025c	Rv2025c	Conserved membrane protein	-	832.723	-0.498228	0.106517	-4.67746	2.9e-06	0.000157389	yes	no
Rv2026c	Rv2026c	Universal stress protein family protein	-	910.56	0.331597	0.122994	2.69605	0.00701682	0.0721822	no	no
dosT	Rv2027c	Two component sensor histidine kinase DosT	-	2493.34	0.121667	0.0983642	1.2369	0.216124	0.53024	no	no
Rv2028c	Rv2028c	Universal stress protein family protein	-	199.541	0.0121362	0.189343	0.0640964	0.948893	0.984369	no	no
pfkB	Rv2029c	6-phosphofructokinase PfkB (phosphohexokinase) (phosphofructokinase)	-	345.154	-0.385425	0.206847	-1.86333	0.0624157	0.274879	no	no
Rv2030c	Rv2030c	Conserved protein	-	418.948	-0.715538	0.136869	-5.22792	1.71e-07	1.32e-05	yes	no
hspX	Rv2031c	Heat shock protein HspX (alpha-crystallin homolog) (14 kDa antigen) (HSP16.3)	-	675.244	-0.730687	0.164607	-4.43899	9.04e-06	0.000417208	yes	no
acg	Rv2032	Conserved protein Acg	+	343.282	-0.459397	0.144967	-3.16898	0.00152977	0.0243396	yes	no
Rv2033c	Rv2033c	Conserved hypothetical protein	-	3344.3	0.0305539	0.069065	0.442393	0.658205	0.869314	no	no
Rv2034	Rv2034	ArsR repressor protein	+	937.336	0.00447094	0.163381	0.0273651	0.978169	0.991964	no	no
Rv2035	Rv2035	Conserved hypothetical protein	+	2571.07	-0.0154488	0.0742149	-0.208163	0.835101	0.951095	no	no
Rv2036	Rv2036	Conserved hypothetical protein	+	2380.34	0.0505742	0.0779522	0.648785	0.516477	0.795022	no	no
Rv2037c	Rv2037c	Conserved transmembrane protein	-	1500.25	0.0750909	0.117923	0.636781	0.524267	0.798792	no	no
Rv2038c	Rv2038c	Probable sugar-transport ATP-binding protein ABC transporter	-	1044.95	0.0121718	0.145763	0.0835035	0.933451	0.979011	no	no
Rv2039c	Rv2039c	Probable sugar-transport integral membrane protein ABC transporter	-	453.474	0.0333608	0.16483	0.202395	0.839608	0.952173	no	no
Rv2040c	Rv2040c	Probable sugar-transport integral membrane protein ABC transporter	-	1386.58	0.00894984	0.084622	0.105763	0.915771	0.974348	no	no
Rv2041c	Rv2041c	Probable sugar-binding lipoprotein	-	1973.63	0.0347138	0.11752	0.295387	0.767698	0.919124	no	no
Rv2042c	Rv2042c	Conserved protein	-	2148.41	-0.0492001	0.076535	-0.642844	0.520325	0.796884	no	no
pncA	Rv2043c	Pyrazinamidase/nicotinamidase PncA (PZase)	-	2694.48	-0.0972618	0.102835	-0.945807	0.344247	0.668097	no	no
Rv2044c	Rv2044c	Conserved hypothetical protein	-	193.035	-0.0110488	0.173947	-0.0635181	0.949354	0.984369	no	no
lppI	Rv2046	Probable lipoprotein LppI	+	2943.15	-0.0871343	0.0736496	-1.18309	0.236773	0.552272	no	no
Rv2047c	Rv2047c	Conserved hypothetical protein	-	4090.69	0.0435604	0.0882882	0.493389	0.621738	0.849763	no	no
pks12	Rv2048c	Polyketide synthase Pks12	-	31058	0.0460585	0.0865696	0.532041	0.594698	0.839402	no	no
Rv2049c	Rv2049c	Conserved hypothetical protein	-	1497.07	0.163071	0.0887132	1.83818	0.0660355	0.282502	no	no
Rv2050	Rv2050	Conserved protein	+	4433.94	-0.018098	0.119687	-0.151211	0.879809	0.966782	no	no
ppm1	Rv2051c	Polyprenol-monophosphomannose synthase Ppm1	-	11700.2	-0.0535273	0.0631518	-0.847597	0.396663	0.706285	no	no
Rv2052c	Rv2052c	Conserved protein	-	3416.33	-0.0429233	0.0853449	-0.502939	0.615007	0.849167	no	no
fxsA	Rv2053c	Probable transmembrane protein FxsA	-	2571.37	-0.102601	0.0676323	-1.51704	0.129257	0.410735	no	no
Rv2054	Rv2054	Conserved protein	+	2681.13	0.0388014	0.0856567	0.452987	0.650558	0.864883	no	no
rpsR2	Rv2055c	30S ribosomal protein S18 RpsR2	-	528.398	0.208998	0.164571	1.26996	0.204101	0.516677	no	no
rpsN2	Rv2056c	30S ribosomal protein S14 RpsN2	-	303.69	0.273714	0.133213	2.05471	0.039907	0.211994	no	no
rpmG1	Rv2057c	50S ribosomal protein L33 RpmG1	-	767.067	-0.035247	0.117146	-0.30088	0.763506	0.918899	no	no
rpmB2	Rv2058c	50S ribosomal protein L28 RpmB2	-	783.628	0.141673	0.127977	1.10702	0.268287	0.586826	no	no
Rv2059	Rv2059	Conserved hypothetical protein	+	1892.89	0.175718	0.130851	1.34288	0.179309	0.481291	no	no
Rv2060	Rv2060	Possible conserved integral membrane protein	+	521.19	-0.0380426	0.115181	-0.330284	0.741185	0.910836	no	no
Rv2061c	Rv2061c	Conserved protein	-	4305.24	-0.0950324	0.0655635	-1.44947	0.147206	0.436305	no	no
cobN	Rv2062c	Cobalamin biosynthesis protein CobN	-	10373.3	-0.132431	0.0779509	-1.6989	0.0893384	0.333638	no	no
mazE7	Rv2063	Antitoxin MazE7	+	250.808	0.317465	0.159048	1.99603	0.0459305	0.229037	no	no
mazF7	Rv2063A	Possible toxin MazF7	+	579.418	0.0996083	0.154214	0.645911	0.518337	0.79647	no	no
cobG	Rv2064	Precorrin-3B synthase CobG	+	1844.9	0.0829262	0.100696	0.823528	0.410208	0.718056	no	no
cobH	Rv2065	Precorrin-8X methylmutase CobH (aka precorrin isomerase)	+	1435.44	0.0272801	0.093568	0.291554	0.770628	0.91998	no	no
cobI	Rv2066	Probable bifunctional protein, CobI-COBJ fusion protein: S-adenosyl-L-methionine-precorrin-2 methyl transferase + precorrin-3 methylase	+	3405.39	-0.00983102	0.0889979	-0.110463	0.912042	0.973607	no	no
Rv2067c	Rv2067c	Conserved protein	-	7559.16	-0.0557826	0.0859465	-0.649038	0.516314	0.795022	no	no
blaC	Rv2068c	Class a beta-lactamase BlaC	-	5557.32	-0.101013	0.0777352	-1.29946	0.193788	0.500741	no	no
sigC	Rv2069	RNA polymerase sigma factor, ECF subfamily, SigC	+	3671.5	-0.39437	0.0747218	-5.27784	1.31e-07	1.06e-05	yes	no
cobK	Rv2070c	Precorrin-6X reductase CobK	-	927.504	0.145801	0.113093	1.28921	0.197324	0.5061	no	no
cobM	Rv2071c	Precorrin-3 methylase CobM (precorrin-4 C11-methyltransferase)	-	1063.2	0.224444	0.103393	2.1708	0.0299467	0.17921	no	no
cobL	Rv2072c	Precorrin-6Y C(5,15)-methyltransferase (decarboxylating) CobL	-	1172.2	0.221903	0.159142	1.39437	0.163206	0.458818	no	no
Rv2073c	Rv2073c	Probable shortchain dehydrogenase	-	663.881	0.245184	0.146385	1.67493	0.0939476	0.343373	no	no
Rv2074	Rv2074	Possible pyridoxamine 5'-phosphate oxidase (PNP/PMP oxidase) (pyridoxinephosphate oxidase) (PNPOX) (pyridoxine 5'-phosphate oxidase)	+	4951.12	0.122143	0.149522	0.816889	0.413992	0.720966	no	no
Rv2075c	Rv2075c	Possible hypothetical exported or envelope protein	-	3782.61	0.0673432	0.0868245	0.775624	0.437971	0.739311	no	no
Rv2076c	Rv2076c	Conserved hypothetical protein	-	1123.66	-0.0331981	0.105363	-0.315083	0.752699	0.91431	no	no
Rv2077c	Rv2077c	Possible conserved transmembrane protein	-	1828.83	-0.0971125	0.108208	-0.897465	0.369471	0.68527	no	no
[truncated: 1,741 more rows]
